# Supplementary material for: Dental Follicle Mesenchymal Stem Cell-Derived Exosomes Mitigate Temporomandibular Joint Osteoarthritis in an In Vitro Model via the miR-146a-5p/Traf6/NF-κB Axis
Source: Research Square preprint supplement (doi:10.21203/rs.3.rs-8341412/v1), 2025-12-19
Supplement: Supplementary file 1 [file 05846e9aa30bf181219c5646.xlsx]

## Sheet: All.ReadsCount
AccID	Control_1	Control_2	Control_3	Treatment_1	Treatment_2	Treatment_3	Model_1	Model_2	Model_3	EnsemblID	GeneID	chromosome	start	end	strand	gene_biotype	Biological_Process	Molecular_Function	Cellular_Component	KO	Pathway	PathwayName
0610030E20Rik	337	337	406	312	366	321	266	266	239	ENSRNOG00000011713	691113	4	104402588	104408320	+	protein_coding	NA	NA	NA	NA	NA	NA
0610040J01Rik	1	1	4	1	2	2	4	1	0	ENSRNOG00000002191	498368	14	44387393	44478041	-	protein_coding	NA	GO:0005654|nucleoplasm;GO:0030054|cell junction;	NA	NA	NA	NA
1110002E22Rik	3	0	0	0	0	0	0	0	6	ENSRNOG00000063384	102555814	2	226583481	226588835	+	protein_coding	NA	NA	NA	NA	NA	NA
1110032F04Rik	6	3	3	0	6	0	2	3	1	ENSRNOG00000009803	100362176	2	153125676	153126419	+	protein_coding	NA	GO:0016020|membrane;	NA	NA	NA	NA
1110038F14Rik	290	263	253	221	251	227	234	183	224	ENSRNOG00000034107	681282	7	108682176	108684358	+	protein_coding	NA	NA	NA	NA	NA	NA
1110065P20Rik	797	627	697	625	670	610	184	161	335	ENSRNOG00000042421	NA	5	137108633	137110929	-	protein_coding	NA	NA	NA	NA	NA	NA
1500009L16Rik	18	14	30	30	34	15	71	54	100	ENSRNOG00000060879	100910996	7	20015102	20057975	-	protein_coding	NA	NA	NA	NA	NA	NA
1600012H06Rik	169	126	119	109	122	117	106	97	78	ENSRNOG00000070184	100125364	1	55949814	55963333	+	protein_coding	GO:0006915|apoptotic process;	GO:0005576|extracellular region;	NA	NA	NA	NA
1600014C10Rik	487	454	441	448	395	361	435	359	500	ENSRNOG00000014966	690000	1	90873549	90886208	+	protein_coding	GO:0006914|autophagy;GO:0006915|apoptotic process;GO:0006979|response to oxidative stress;GO:0051560|mitochondrial calcium ion homeostasis;	GO:0005739|mitochondrion;GO:0005783|endoplasmic reticulum;GO:0005829|cytosol;GO:0031966|mitochondrial membrane;	NA	NA	NA	NA
1700001P01Rik	0	0	0	1	0	0	0	0	2	ENSRNOG00000036888	691189	10	82764438	82768039	-	protein_coding	NA	NA	NA	NA	NA	NA
1700013G24Rik	0	0	0	0	0	0	0	0	0	ENSRNOG00000013566	690206	5	149659122	149662945	+	protein_coding	NA	NA	NA	NA	NA	NA
1700017N19Rik	0	0	2	0	0	0	2	0	0	ENSRNOG00000051928	500827	7	35411555	35443320	+	protein_coding	GO:0016973|poly(A)+ mRNA export from nucleus;	NA	GO:0046872|metal ion binding;	NA	NA	NA
1700019D03Rik	0	0	0	0	0	0	1	0	0	ENSRNOG00000038738	685203	9	48568409	48584831	+	protein_coding	NA	GO:0005886|plasma membrane;	GO:0034237|protein kinase A regulatory subunit binding;	NA	NA	NA
1700020N01Rik	0	0	0	0	0	0	0	0	0	ENSRNOG00000059251	108349468	1	23361748	23395300	-	protein_coding	GO:0006355|regulation of DNA-templated transcription;	NA	NA	NA	NA	NA
1700021F07Rik	0	0	0	0	0	0	0	0	0	ENSRNOG00000028533	689618	3	162315622	162322455	+	protein_coding	NA	NA	NA	NA	NA	NA
1700024G13Rik	0	0	0	0	0	0	0	0	0	ENSRNOG00000039749	680885	16	7634207	7644876	-	protein_coding	NA	NA	NA	NA	NA	NA
1700028K03Rik	3	0	2	4	2	3	7	2	0	ENSRNOG00000047876	689986	14	2231451	2270782	-	protein_coding	GO:0007130|synaptonemal complex assembly;GO:0007131|reciprocal meiotic recombination;	GO:0005694|chromosome;	NA	NA	NA	NA
1700030J22Rik	12	18	15	18	19	9	28	18	14	ENSRNOG00000045541	687399	19	45022280	45032683	-	protein_coding	NA	GO:0005654|nucleoplasm;GO:0005829|cytosol;	NA	NA	NA	NA
1700031L13Rik	0	0	0	0	0	0	0	0	0	ENSRNOG00000062941	NA	14	26019173	26019331	+	protein_coding	NA	NA	NA	NA	NA	NA
1700056E22Rik	0	1	0	2	0	0	0	1	0	ENSRNOG00000004066	100912365	13	95612866	95614164	-	protein_coding	NA	NA	NA	NA	NA	NA
1700057G04Rik	0	0	0	0	1	0	0	0	0	ENSRNOG00000030551	102551265	8	92860469	92903755	+	protein_coding	GO:0017121|plasma membrane phospholipid scrambling;	GO:0005886|plasma membrane;	GO:0017128|phospholipid scramblase activity;	NA	NA	NA
1700066B19Rik	0	0	0	0	0	0	1	0	0	ENSRNOG00000066011	NA	18	27325433	27327213	+	protein_coding	NA	NA	NA	NA	NA	NA
1700067K01Rik	32	28	35	42	40	26	55	61	86	ENSRNOG00000005533	686013	19	24146815	24150095	-	protein_coding	GO:0001701|in utero embryonic development;	NA	NA	NA	NA	NA
1700092M07Rik	2	2	1	0	3	1	1	1	0	ENSRNOG00000063481	120099984	1	205631828	205637144	+	protein_coding	NA	NA	NA	NA	NA	NA
1700102P08Rik	8	10	5	22	13	11	16	16	11	ENSRNOG00000046155	498675	8	109036030	109097895	+	protein_coding	GO:0007283|spermatogenesis;	NA	NA	NA	NA	NA
1700109H08Rik	3	6	11	5	2	4	6	9	5	ENSRNOG00000009135	500007	4	30569045	30588558	-	protein_coding	NA	NA	GO:0005509|calcium ion binding;	NA	NA	NA
1700122O11Rik	1	3	1	3	0	0	7	7	13	ENSRNOG00000067280	100911489	9	12941405	12943070	+	protein_coding	NA	NA	NA	NA	NA	NA
1700123L14Rik	0	0	0	0	0	0	0	0	0	ENSRNOG00000024560	500265	4	128787100	128789312	-	protein_coding	GO:0051028|mRNA transport;	GO:0005643|nuclear pore;	NA	NA	NA	NA
1810010H24Rik	200	159	190	153	151	157	183	185	143	ENSRNOG00000043295	498014	10	91972410	91977602	+	protein_coding	NA	NA	NA	NA	NA	NA
1810037I17Rik	414	344	401	419	436	392	1761	1646	1395	ENSRNOG00000014654	691807	2	211055911	211057681	+	protein_coding	GO:1901877|negative regulation of calcium ion binding;GO:1901895|negative regulation of ATPase-coupled calcium transmembrane transporter activity;	GO:0005789|endoplasmic reticulum membrane;	NA	K26467|another-regulin;	rno04020;	Calcium signaling pathway;
2010003K11Rik	0	0	0	0	0	0	0	0	0	ENSRNOG00000036641	689065	1	201784009	201785916	-	protein_coding	NA	NA	NA	NA	NA	NA
2210017I01Rik	0	0	0	0	0	0	0	0	0	ENSRNOG00000065845	NA	2	178182848	178183135	-	protein_coding	NA	NA	NA	NA	NA	NA
2310002L09Rik	0	0	0	0	0	0	0	0	0	ENSRNOG00000045733	298139	5	87692735	87706183	-	protein_coding	NA	GO:0016020|membrane;	NA	NA	NA	NA
2310039H08Rik	119	100	99	89	102	82	126	73	99	ENSRNOG00000046871	681367	9	14208417	14208761	-	protein_coding	NA	NA	NA	NA	NA	NA
2310050C09Rik	0	0	0	0	0	0	0	0	0	ENSRNOG00000023511	686143	2	178481373	178483424	-	protein_coding	NA	NA	NA	NA	NA	NA
2310061N02Rik	0	0	0	0	0	0	0	0	0	ENSRNOG00000001570	100363136	11	28023949	28024476	-	protein_coding	NA	GO:0005829|cytosol;GO:0045095|keratin filament;	NA	NA	NA	NA
2310079G19Rik	0	0	0	0	0	0	0	0	0	ENSRNOG00000050096	100912272	11	27947508	27948065	-	protein_coding	NA	GO:0005829|cytosol;GO:0045095|keratin filament;	GO:0005198|structural molecule activity;	NA	NA	NA
2610008E11Rik	515	418	423	419	411	398	480	459	233	ENSRNOG00000022871	691170	7	10430206	10451406	+	protein_coding	GO:0006357|regulation of transcription by RNA polymerase II;	GO:0005634|nucleus;	GO:0000977|RNA polymerase II transcription regulatory region sequence-specific DNA binding;GO:0000981|DNA-binding transcription factor activity, RNA polymerase II-specific;GO:0046872|metal ion binding;	K09228|KRAB domain-containing zinc finger protein;	rno05168;	Herpes simplex virus 1 infection;
2700049A03Rik	391	434	450	394	412	364	332	296	360	ENSRNOG00000008244	690035	6	89623699	89725962	+	protein_coding	GO:0007224|smoothened signaling pathway;GO:0060271|cilium assembly;GO:0070201|regulation of establishment of protein localization;	GO:0005813|centrosome;GO:0005814|centriole;GO:0036064|ciliary basal body;	NA	NA	NA	NA
2810021J22Rik	147	155	136	114	116	143	191	168	142	ENSRNOG00000023431	NA	10	43630069	43645966	+	protein_coding	NA	NA	NA	NA	NA	NA
2810459M11Rik	0	0	0	0	0	0	0	2	0	ENSRNOG00000017557	100362216	9	86691867	86698185	+	protein_coding	NA	NA	NA	NA	NA	NA
3110082J24Rik	0	1	1	0	3	0	3	1	4	ENSRNOG00000046262	NA	6	26241695	26243651	+	protein_coding	NA	NA	NA	NA	NA	NA
4833439L19Rik	903	860	934	838	732	738	520	459	526	ENSRNOG00000017133	306766	17	10049160	10061819	+	protein_coding	GO:0008150|biological_process;	GO:0005575|cellular_component;GO:0005737|cytoplasm;	GO:0003674|molecular_function;GO:0016491|oxidoreductase activity;	NA	NA	NA
4930402F06Rik	0	0	0	0	0	0	0	0	0	ENSRNOG00000039210	502618	3	18713197	18729441	-	protein_coding	GO:0005975|carbohydrate metabolic process;GO:0030259|lipid glycosylation;	GO:0005794|Golgi apparatus;GO:0016020|membrane;GO:0031982|vesicle;	GO:0016757|glycosyltransferase activity;GO:0016758|hexosyltransferase activity;	NA	NA	NA
4930444P10Rik	3	2	0	3	0	0	0	0	0	ENSRNOG00000047310	100912291	5	3225638	3247589	+	protein_coding	NA	NA	NA	NA	NA	NA
4930455H04Rik	0	0	1	0	0	0	0	0	0	ENSRNOG00000070759	NA	2	204941062	204955671	+	protein_coding	NA	NA	NA	NA	NA	NA
4930503L19Rik	851	787	880	848	777	770	763	804	1001	ENSRNOG00000028677	361346	18	64065740	64089415	-	protein_coding	GO:0008285|negative regulation of cell population proliferation;	GO:0005576|extracellular region;	NA	NA	NA	NA
4930523C07Rik	594	538	529	461	515	557	290	231	358	ENSRNOG00000049537	100302372	13	72274552	72312103	+	protein_coding	NA	GO:0016020|membrane;	NA	NA	NA	NA
4930544D05Rik	4	9	5	7	5	8	22	21	57	ENSRNOG00000042847	687707	10	55332244	55333196	+	protein_coding	NA	NA	NA	NA	NA	NA
4930563E22Rik	352	351	373	342	331	297	473	393	455	ENSRNOG00000067475	100912483	10	56832412	56843871	+	protein_coding	NA	NA	NA	NA	NA	NA
4931406B18Rik	0	0	0	0	0	0	0	0	0	ENSRNOG00000032990	690483	1	93900773	93913028	-	protein_coding	NA	NA	NA	NA	NA	NA
4933400A11Rik	3	1	0	0	1	0	0	0	1	ENSRNOG00000003688	NA	X	24389645	24393849	+	protein_coding	NA	NA	NA	NA	NA	NA
4933403O08Rik	0	2	0	0	0	0	0	0	0	ENSRNOG00000042394	NA	X	77306795	77311232	+	protein_coding	NA	NA	NA	NA	NA	NA
4933412E24Rik	0	0	0	0	0	0	0	0	0	ENSRNOG00000004914	500876	7	91616126	91618033	-	protein_coding	NA	NA	NA	NA	NA	NA
5S_rRNA	8	8	17	9	6	18	5	16	5	ENSRNOG00000034316	120093896	7	63840510	63840625	-	rRNA	NA	NA	NA	NA	NA	NA
5S_rRNA	8	8	17	9	6	18	5	16	5	ENSRNOG00000034503	120094510	8	45409189	45409294	+	rRNA	NA	NA	NA	NA	NA	NA
5S_rRNA	8	8	17	9	6	18	5	16	5	ENSRNOG00000034535	120097192	15	21042358	21042476	-	rRNA	NA	NA	NA	NA	NA	NA
5S_rRNA	8	8	17	9	6	18	5	16	5	ENSRNOG00000034597	120098340	18	26478511	26478629	-	rRNA	NA	NA	NA	NA	NA	NA
5S_rRNA	8	8	17	9	6	18	5	16	5	ENSRNOG00000034790	120097579	16	75818998	75819115	-	rRNA	NA	NA	NA	NA	NA	NA
5S_rRNA	8	8	17	9	6	18	5	16	5	ENSRNOG00000034938	120094400	8	106210563	106210681	-	rRNA	NA	NA	NA	NA	NA	NA
5S_rRNA	8	8	17	9	6	18	5	16	5	ENSRNOG00000035046	120100437	1	207205662	207205779	-	rRNA	NA	NA	NA	NA	NA	NA
5S_rRNA	8	8	17	9	6	18	5	16	5	ENSRNOG00000035103	120096019	12	36482702	36482820	-	rRNA	NA	NA	NA	NA	NA	NA
5S_rRNA	8	8	17	9	6	18	5	16	5	ENSRNOG00000035114	120096080	12	21476153	21476268	+	rRNA	NA	NA	NA	NA	NA	NA
5S_rRNA	8	8	17	9	6	18	5	16	5	ENSRNOG00000035926	120098412	18	57657451	57657572	-	rRNA	NA	NA	NA	NA	NA	NA
5S_rRNA	8	8	17	9	6	18	5	16	5	ENSRNOG00000035975	120097639	16	36578173	36578291	+	rRNA	NA	NA	NA	NA	NA	NA
5S_rRNA	8	8	17	9	6	18	5	16	5	ENSRNOG00000040652	120096078	12	34444803	34444920	-	rRNA	NA	NA	NA	NA	NA	NA
5S_rRNA	8	8	17	9	6	18	5	16	5	ENSRNOG00000055727	120098724	19	48642686	48642804	+	rRNA	NA	NA	NA	NA	NA	NA
5S_rRNA	8	8	17	9	6	18	5	16	5	ENSRNOG00000058198	120093275	6	40922922	40923040	-	rRNA	NA	NA	NA	NA	NA	NA
5S_rRNA	8	8	17	9	6	18	5	16	5	ENSRNOG00000062342	120096148	12	4048451	4048568	+	rRNA	NA	NA	NA	NA	NA	NA
5S_rRNA	8	8	17	9	6	18	5	16	5	ENSRNOG00000062433	120096139	12	1133457	1133574	-	rRNA	NA	NA	NA	NA	NA	NA
5S_rRNA	8	8	17	9	6	18	5	16	5	ENSRNOG00000062504	120096061	12	4014277	4014394	+	rRNA	NA	NA	NA	NA	NA	NA
5S_rRNA	8	8	17	9	6	18	5	16	5	ENSRNOG00000062514	120102552	4	20519601	20519719	-	rRNA	NA	NA	NA	NA	NA	NA
5S_rRNA	8	8	17	9	6	18	5	16	5	ENSRNOG00000062589	120096159	12	4078485	4078602	+	rRNA	NA	NA	NA	NA	NA	NA
5S_rRNA	8	8	17	9	6	18	5	16	5	ENSRNOG00000062634	120096133	12	1113453	1113570	-	rRNA	NA	NA	NA	NA	NA	NA
5S_rRNA	8	8	17	9	6	18	5	16	5	ENSRNOG00000062638	120096036	12	4026499	4026616	+	rRNA	NA	NA	NA	NA	NA	NA
5S_rRNA	8	8	17	9	6	18	5	16	5	ENSRNOG00000062639	120096020	12	4118192	4118309	+	rRNA	NA	NA	NA	NA	NA	NA
5S_rRNA	8	8	17	9	6	18	5	16	5	ENSRNOG00000062894	120096041	12	4113284	4113401	+	rRNA	NA	NA	NA	NA	NA	NA
5S_rRNA	8	8	17	9	6	18	5	16	5	ENSRNOG00000062902	120096136	12	1120829	1120946	-	rRNA	NA	NA	NA	NA	NA	NA
5S_rRNA	8	8	17	9	6	18	5	16	5	ENSRNOG00000062914	120096031	12	4094506	4094623	+	rRNA	NA	NA	NA	NA	NA	NA
5S_rRNA	8	8	17	9	6	18	5	16	5	ENSRNOG00000062974	120096098	12	1068781	1068898	-	rRNA	NA	NA	NA	NA	NA	NA
5S_rRNA	8	8	17	9	6	18	5	16	5	ENSRNOG00000063149	120100328	1	182252145	182252263	+	rRNA	NA	NA	NA	NA	NA	NA
5S_rRNA	8	8	17	9	6	18	5	16	5	ENSRNOG00000063208	120096150	12	4050898	4051015	+	rRNA	NA	NA	NA	NA	NA	NA
5S_rRNA	8	8	17	9	6	18	5	16	5	ENSRNOG00000063378	120096035	12	1082084	1082201	-	rRNA	NA	NA	NA	NA	NA	NA
5S_rRNA	8	8	17	9	6	18	5	16	5	ENSRNOG00000063447	120096157	12	4070480	4070597	+	rRNA	NA	NA	NA	NA	NA	NA
5S_rRNA	8	8	17	9	6	18	5	16	5	ENSRNOG00000063472	120096120	12	1077242	1077359	-	rRNA	NA	NA	NA	NA	NA	NA
5S_rRNA	8	8	17	9	6	18	5	16	5	ENSRNOG00000063492	120096076	12	1044405	1044522	-	rRNA	NA	NA	NA	NA	NA	NA
5S_rRNA	8	8	17	9	6	18	5	16	5	ENSRNOG00000063515	120098722	19	51610075	51610193	-	rRNA	NA	NA	NA	NA	NA	NA
5S_rRNA	8	8	17	9	6	18	5	16	5	ENSRNOG00000063557	120096131	12	1101944	1102061	-	rRNA	NA	NA	NA	NA	NA	NA
5S_rRNA	8	8	17	9	6	18	5	16	5	ENSRNOG00000063697	120096024	12	1051558	1051675	-	rRNA	NA	NA	NA	NA	NA	NA
5S_rRNA	8	8	17	9	6	18	5	16	5	ENSRNOG00000063764	120096055	12	1166554	1166671	-	rRNA	NA	NA	NA	NA	NA	NA
5S_rRNA	8	8	17	9	6	18	5	16	5	ENSRNOG00000063776	120096079	12	1061420	1061537	-	rRNA	NA	NA	NA	NA	NA	NA
5S_rRNA	8	8	17	9	6	18	5	16	5	ENSRNOG00000063862	120096147	12	4046002	4046119	+	rRNA	NA	NA	NA	NA	NA	NA
5S_rRNA	8	8	17	9	6	18	5	16	5	ENSRNOG00000063893	120096145	12	4023938	4024055	+	rRNA	NA	NA	NA	NA	NA	NA
5S_rRNA	8	8	17	9	6	18	5	16	5	ENSRNOG00000063911	120096047	12	1073689	1073806	-	rRNA	NA	NA	NA	NA	NA	NA
5S_rRNA	8	8	17	9	6	18	5	16	5	ENSRNOG00000063921	120096156	12	4068023	4068140	+	rRNA	NA	NA	NA	NA	NA	NA
5S_rRNA	8	8	17	9	6	18	5	16	5	ENSRNOG00000063948	120098736	19	51581263	51581381	-	rRNA	NA	NA	NA	NA	NA	NA
5S_rRNA	8	8	17	9	6	18	5	16	5	ENSRNOG00000063972	120096162	12	4105896	4106013	+	rRNA	NA	NA	NA	NA	NA	NA
5S_rRNA	8	8	17	9	6	18	5	16	5	ENSRNOG00000064155	120096134	12	1115910	1116027	-	rRNA	NA	NA	NA	NA	NA	NA
5S_rRNA	8	8	17	9	6	18	5	16	5	ENSRNOG00000064185	120096155	12	4065564	4065681	+	rRNA	NA	NA	NA	NA	NA	NA
5S_rRNA	8	8	17	9	6	18	5	16	5	ENSRNOG00000064190	120096160	12	4133032	4133149	+	rRNA	NA	NA	NA	NA	NA	NA
5S_rRNA	8	8	17	9	6	18	5	16	5	ENSRNOG00000064272	120096066	12	4009551	4009668	+	rRNA	NA	NA	NA	NA	NA	NA
5S_rRNA	8	8	17	9	6	18	5	16	5	ENSRNOG00000064336	120096069	12	1135912	1136034	-	rRNA	NA	NA	NA	NA	NA	NA
5S_rRNA	8	8	17	9	6	18	5	16	5	ENSRNOG00000064343	120096161	12	4101959	4102076	+	rRNA	NA	NA	NA	NA	NA	NA
5S_rRNA	8	8	17	9	6	18	5	16	5	ENSRNOG00000064352	120096045	12	1063888	1064005	-	rRNA	NA	NA	NA	NA	NA	NA
5S_rRNA	8	8	17	9	6	18	5	16	5	ENSRNOG00000064391	120096165	12	4115728	4115845	+	rRNA	NA	NA	NA	NA	NA	NA
5S_rRNA	8	8	17	9	6	18	5	16	5	ENSRNOG00000064405	120096030	12	1104401	1104518	-	rRNA	NA	NA	NA	NA	NA	NA
5S_rRNA	8	8	17	9	6	18	5	16	5	ENSRNOG00000064514	120098693	19	51588947	51589065	-	rRNA	NA	NA	NA	NA	NA	NA
5S_rRNA	8	8	17	9	6	18	5	16	5	ENSRNOG00000064538	120096146	12	4040245	4040362	+	rRNA	NA	NA	NA	NA	NA	NA
5S_rRNA	8	8	17	9	6	18	5	16	5	ENSRNOG00000064592	120100217	1	243285618	243285736	+	rRNA	NA	NA	NA	NA	NA	NA
5S_rRNA	8	8	17	9	6	18	5	16	5	ENSRNOG00000064618	120096154	12	4063090	4063207	+	rRNA	NA	NA	NA	NA	NA	NA
5S_rRNA	8	8	17	9	6	18	5	16	5	ENSRNOG00000064624	120096049	12	4091907	4092024	+	rRNA	NA	NA	NA	NA	NA	NA
5S_rRNA	8	8	17	9	6	18	5	16	5	ENSRNOG00000064696	120096029	12	1131056	1131173	-	rRNA	NA	NA	NA	NA	NA	NA
5S_rRNA	8	8	17	9	6	18	5	16	5	ENSRNOG00000064748	120096046	12	1084540	1084657	-	rRNA	NA	NA	NA	NA	NA	NA
5S_rRNA	8	8	17	9	6	18	5	16	5	ENSRNOG00000064757	120096026	12	1053947	1054064	-	rRNA	NA	NA	NA	NA	NA	NA
5S_rRNA	8	8	17	9	6	18	5	16	5	ENSRNOG00000064767	120096129	12	1097042	1097159	-	rRNA	NA	NA	NA	NA	NA	NA
5S_rRNA	8	8	17	9	6	18	5	16	5	ENSRNOG00000064850	120096028	12	4139418	4139535	+	rRNA	NA	NA	NA	NA	NA	NA
5S_rRNA	8	8	17	9	6	18	5	16	5	ENSRNOG00000064863	120096075	12	4031451	4031568	+	rRNA	NA	NA	NA	NA	NA	NA
5S_rRNA	8	8	17	9	6	18	5	16	5	ENSRNOG00000064898	120096163	12	4108346	4108463	+	rRNA	NA	NA	NA	NA	NA	NA
5S_rRNA	8	8	17	9	6	18	5	16	5	ENSRNOG00000064906	120096021	12	4122862	4122979	+	rRNA	NA	NA	NA	NA	NA	NA
5S_rRNA	8	8	17	9	6	18	5	16	5	ENSRNOG00000065030	120096023	12	4126760	4126877	+	rRNA	NA	NA	NA	NA	NA	NA
5S_rRNA	8	8	17	9	6	18	5	16	5	ENSRNOG00000065057	120096149	12	4083444	4083561	+	rRNA	NA	NA	NA	NA	NA	NA
5S_rRNA	8	8	17	9	6	18	5	16	5	ENSRNOG00000065132	120098704	19	51590707	51590825	-	rRNA	NA	NA	NA	NA	NA	NA
5S_rRNA	8	8	17	9	6	18	5	16	5	ENSRNOG00000065173	120098725	19	51579501	51579619	-	rRNA	NA	NA	NA	NA	NA	NA
5S_rRNA	8	8	17	9	6	18	5	16	5	ENSRNOG00000065316	120096126	12	1181141	1181258	-	rRNA	NA	NA	NA	NA	NA	NA
5S_rRNA	8	8	17	9	6	18	5	16	5	ENSRNOG00000065370	120096164	12	4110812	4110929	+	rRNA	NA	NA	NA	NA	NA	NA
5S_rRNA	8	8	17	9	6	18	5	16	5	ENSRNOG00000065400	120096042	12	1087133	1087250	-	rRNA	NA	NA	NA	NA	NA	NA
5S_rRNA	8	8	17	9	6	18	5	16	5	ENSRNOG00000065423	120098716	19	51601273	51601391	-	rRNA	NA	NA	NA	NA	NA	NA
5S_rRNA	8	8	17	9	6	18	5	16	5	ENSRNOG00000065467	120096057	12	1056470	1056587	-	rRNA	NA	NA	NA	NA	NA	NA
5S_rRNA	8	8	17	9	6	18	5	16	5	ENSRNOG00000065486	120096022	12	4136935	4137052	+	rRNA	NA	NA	NA	NA	NA	NA
5S_rRNA	8	8	17	9	6	18	5	16	5	ENSRNOG00000065496	120096065	12	4018986	4019103	+	rRNA	NA	NA	NA	NA	NA	NA
5S_rRNA	8	8	17	9	6	18	5	16	5	ENSRNOG00000065549	120094951	9	94156794	94156912	+	rRNA	NA	NA	NA	NA	NA	NA
5S_rRNA	8	8	17	9	6	18	5	16	5	ENSRNOG00000065593	120098721	19	51608311	51608429	-	rRNA	NA	NA	NA	NA	NA	NA
5S_rRNA	8	8	17	9	6	18	5	16	5	ENSRNOG00000065615	120096056	12	1171430	1171547	-	rRNA	NA	NA	NA	NA	NA	NA
5S_rRNA	8	8	17	9	6	18	5	16	5	ENSRNOG00000065678	120096109	12	1071219	1071336	-	rRNA	NA	NA	NA	NA	NA	NA
5S_rRNA	8	8	17	9	6	18	5	16	5	ENSRNOG00000065950	120098713	19	51595991	51596109	-	rRNA	NA	NA	NA	NA	NA	NA
5S_rRNA	8	8	17	9	6	18	5	16	5	ENSRNOG00000065983	120096032	12	1109315	1109432	-	rRNA	NA	NA	NA	NA	NA	NA
5S_rRNA	8	8	17	9	6	18	5	16	5	ENSRNOG00000066000	120096141	12	1141321	1141438	-	rRNA	NA	NA	NA	NA	NA	NA
5S_rRNA	8	8	17	9	6	18	5	16	5	ENSRNOG00000066022	120096153	12	4060687	4060804	+	rRNA	NA	NA	NA	NA	NA	NA
5S_rRNA	8	8	17	9	6	18	5	16	5	ENSRNOG00000066211	120096087	12	1066338	1066455	-	rRNA	NA	NA	NA	NA	NA	NA
5S_rRNA	8	8	17	9	6	18	5	16	5	ENSRNOG00000066370	120096132	12	1106852	1106969	-	rRNA	NA	NA	NA	NA	NA	NA
5S_rRNA	8	8	17	9	6	18	5	16	5	ENSRNOG00000066427	120096070	12	4016619	4016736	+	rRNA	NA	NA	NA	NA	NA	NA
5S_rRNA	8	8	17	9	6	18	5	16	5	ENSRNOG00000066442	120102040	3	41274166	41274284	-	rRNA	NA	NA	NA	NA	NA	NA
5S_rRNA	8	8	17	9	6	18	5	16	5	ENSRNOG00000066443	120098711	19	51592467	51592585	-	rRNA	NA	NA	NA	NA	NA	NA
5S_rRNA	8	8	17	9	6	18	5	16	5	ENSRNOG00000066581	120098720	19	51606555	51606673	-	rRNA	NA	NA	NA	NA	NA	NA
5S_rRNA	8	8	17	9	6	18	5	16	5	ENSRNOG00000066705	120096060	12	4099561	4099678	+	rRNA	NA	NA	NA	NA	NA	NA
5S_rRNA	8	8	17	9	6	18	5	16	5	ENSRNOG00000066865	120096072	12	1168995	1169112	-	rRNA	NA	NA	NA	NA	NA	NA
5S_rRNA	8	8	17	9	6	18	5	16	5	ENSRNOG00000067017	120096048	12	4086718	4086835	+	rRNA	NA	NA	NA	NA	NA	NA
5S_rRNA	8	8	17	9	6	18	5	16	5	ENSRNOG00000067020	120096034	12	1178736	1178853	-	rRNA	NA	NA	NA	NA	NA	NA
5S_rRNA	8	8	17	9	6	18	5	16	5	ENSRNOG00000067049	120096062	12	4130574	4130691	+	rRNA	NA	NA	NA	NA	NA	NA
5S_rRNA	8	8	17	9	6	18	5	16	5	ENSRNOG00000067099	120096152	12	4058243	4058360	+	rRNA	NA	NA	NA	NA	NA	NA
5S_rRNA	8	8	17	9	6	18	5	16	5	ENSRNOG00000067123	120096027	12	1128087	1128204	-	rRNA	NA	NA	NA	NA	NA	NA
5S_rRNA	8	8	17	9	6	18	5	16	5	ENSRNOG00000067176	120094858	9	104784301	104784419	-	rRNA	NA	NA	NA	NA	NA	NA
5S_rRNA	8	8	17	9	6	18	5	16	5	ENSRNOG00000067197	120096144	12	1148672	1148789	-	rRNA	NA	NA	NA	NA	NA	NA
5S_rRNA	8	8	17	9	6	18	5	16	5	ENSRNOG00000067199	120096067	12	4007176	4007293	+	rRNA	NA	NA	NA	NA	NA	NA
5S_rRNA	8	8	17	9	6	18	5	16	5	ENSRNOG00000067227	120096052	12	1156702	1156819	-	rRNA	NA	NA	NA	NA	NA	NA
5S_rRNA	8	8	17	9	6	18	5	16	5	ENSRNOG00000067264	120098717	19	51577741	51577859	-	rRNA	NA	NA	NA	NA	NA	NA
5S_rRNA	8	8	17	9	6	18	5	16	5	ENSRNOG00000067454	120096058	12	1176282	1176399	-	rRNA	NA	NA	NA	NA	NA	NA
5S_rRNA	8	8	17	9	6	18	5	16	5	ENSRNOG00000067552	120096128	12	1079673	1079790	-	rRNA	NA	NA	NA	NA	NA	NA
5S_rRNA	8	8	17	9	6	18	5	16	5	ENSRNOG00000067666	120096053	12	1161665	1161782	-	rRNA	NA	NA	NA	NA	NA	NA
5S_rRNA	8	8	17	9	6	18	5	16	5	ENSRNOG00000067720	120096044	12	1049165	1049282	-	rRNA	NA	NA	NA	NA	NA	NA
5S_rRNA	8	8	17	9	6	18	5	16	5	ENSRNOG00000067783	120098714	19	51597753	51597871	-	rRNA	NA	NA	NA	NA	NA	NA
5S_rRNA	8	8	17	9	6	18	5	16	5	ENSRNOG00000067880	120096040	12	4053347	4053464	+	rRNA	NA	NA	NA	NA	NA	NA
5S_rRNA	8	8	17	9	6	18	5	16	5	ENSRNOG00000067994	120096073	12	1173851	1173968	-	rRNA	NA	NA	NA	NA	NA	NA
5S_rRNA	8	8	17	9	6	18	5	16	5	ENSRNOG00000068030	120096025	12	1046788	1046905	-	rRNA	NA	NA	NA	NA	NA	NA
5S_rRNA	8	8	17	9	6	18	5	16	5	ENSRNOG00000068031	120096039	12	4037782	4037899	+	rRNA	NA	NA	NA	NA	NA	NA
5S_rRNA	8	8	17	9	6	18	5	16	5	ENSRNOG00000068125	120096140	12	1138862	1138979	-	rRNA	NA	NA	NA	NA	NA	NA
5S_rRNA	8	8	17	9	6	18	5	16	5	ENSRNOG00000068237	120096138	12	4075386	4075503	+	rRNA	NA	NA	NA	NA	NA	NA
5S_rRNA	8	8	17	9	6	18	5	16	5	ENSRNOG00000068338	120096064	12	4149799	4149916	+	rRNA	NA	NA	NA	NA	NA	NA
5S_rRNA	8	8	17	9	6	18	5	16	5	ENSRNOG00000068354	120096043	12	1092526	1092643	-	rRNA	NA	NA	NA	NA	NA	NA
5S_rRNA	8	8	17	9	6	18	5	16	5	ENSRNOG00000068400	120096038	12	4035331	4035448	+	rRNA	NA	NA	NA	NA	NA	NA
5S_rRNA	8	8	17	9	6	18	5	16	5	ENSRNOG00000068581	120096059	12	4089427	4089544	+	rRNA	NA	NA	NA	NA	NA	NA
5S_rRNA	8	8	17	9	6	18	5	16	5	ENSRNOG00000068657	120096158	12	4072938	4073055	+	rRNA	NA	NA	NA	NA	NA	NA
5S_rRNA	8	8	17	9	6	18	5	16	5	ENSRNOG00000068924	120096063	12	4029100	4029217	+	rRNA	NA	NA	NA	NA	NA	NA
5S_rRNA	8	8	17	9	6	18	5	16	5	ENSRNOG00000068925	120096033	12	1151128	1151245	-	rRNA	NA	NA	NA	NA	NA	NA
5S_rRNA	8	8	17	9	6	18	5	16	5	ENSRNOG00000068944	120098666	19	51575979	51576097	-	rRNA	NA	NA	NA	NA	NA	NA
5S_rRNA	8	8	17	9	6	18	5	16	5	ENSRNOG00000069008	120096142	12	1143768	1143885	-	rRNA	NA	NA	NA	NA	NA	NA
5S_rRNA	8	8	17	9	6	18	5	16	5	ENSRNOG00000069035	120096074	12	4011908	4012025	+	rRNA	NA	NA	NA	NA	NA	NA
5S_rRNA	8	8	17	9	6	18	5	16	5	ENSRNOG00000069085	120098683	19	51587193	51587311	-	rRNA	NA	NA	NA	NA	NA	NA
5S_rRNA	8	8	17	9	6	18	5	16	5	ENSRNOG00000069307	120096054	12	1164089	1164206	-	rRNA	NA	NA	NA	NA	NA	NA
5S_rRNA	8	8	17	9	6	18	5	16	5	ENSRNOG00000069325	120096137	12	1125691	1125808	-	rRNA	NA	NA	NA	NA	NA	NA
5S_rRNA	8	8	17	9	6	18	5	16	5	ENSRNOG00000069430	120098748	19	51583020	51583138	-	rRNA	NA	NA	NA	NA	NA	NA
5S_rRNA	8	8	17	9	6	18	5	16	5	ENSRNOG00000069546	120096071	12	4080973	4081089	+	rRNA	NA	NA	NA	NA	NA	NA
5S_rRNA	8	8	17	9	6	18	5	16	5	ENSRNOG00000069603	120096143	12	1146211	1146328	-	rRNA	NA	NA	NA	NA	NA	NA
5S_rRNA	8	8	17	9	6	18	5	16	5	ENSRNOG00000069873	120096068	12	1058972	1059089	-	rRNA	NA	NA	NA	NA	NA	NA
5S_rRNA	8	8	17	9	6	18	5	16	5	ENSRNOG00000069928	120098723	19	51574203	51574321	-	rRNA	NA	NA	NA	NA	NA	NA
5S_rRNA	8	8	17	9	6	18	5	16	5	ENSRNOG00000069982	120100110	1	243761050	243761168	+	rRNA	NA	NA	NA	NA	NA	NA
5S_rRNA	8	8	17	9	6	18	5	16	5	ENSRNOG00000070248	120098719	19	51604795	51604913	-	rRNA	NA	NA	NA	NA	NA	NA
5S_rRNA	8	8	17	9	6	18	5	16	5	ENSRNOG00000070259	120098715	19	51599513	51599631	-	rRNA	NA	NA	NA	NA	NA	NA
5S_rRNA	8	8	17	9	6	18	5	16	5	ENSRNOG00000070262	120096130	12	1099495	1099612	-	rRNA	NA	NA	NA	NA	NA	NA
5S_rRNA	8	8	17	9	6	18	5	16	5	ENSRNOG00000070337	120098718	19	51603037	51603155	-	rRNA	NA	NA	NA	NA	NA	NA
5S_rRNA	8	8	17	9	6	18	5	16	5	ENSRNOG00000070555	120096050	12	4096994	4097111	+	rRNA	NA	NA	NA	NA	NA	NA
5S_rRNA	8	8	17	9	6	18	5	16	5	ENSRNOG00000070678	120098672	19	51584773	51584891	-	rRNA	NA	NA	NA	NA	NA	NA
5S_rRNA	8	8	17	9	6	18	5	16	5	ENSRNOG00000070719	120096037	12	1153573	1153690	-	rRNA	NA	NA	NA	NA	NA	NA
5S_rRNA	8	8	17	9	6	18	5	16	5	ENSRNOG00000070840	120101931	3	151710338	151710456	+	rRNA	NA	NA	NA	NA	NA	NA
5S_rRNA	8	8	17	9	6	18	5	16	5	ENSRNOG00000070995	120096077	12	1123298	1123415	-	rRNA	NA	NA	NA	NA	NA	NA
5S_rRNA	8	8	17	9	6	18	5	16	5	ENSRNOG00000071017	120096051	12	4021353	4021470	+	rRNA	NA	NA	NA	NA	NA	NA
5S_rRNA	8	8	17	9	6	18	5	16	5	ENSRNOG00000071042	120096135	12	1118364	1118481	-	rRNA	NA	NA	NA	NA	NA	NA
5S_rRNA	8	8	17	9	6	18	5	16	5	ENSRNOG00000071121	120098712	19	51594231	51594349	-	rRNA	NA	NA	NA	NA	NA	NA
5S_rRNA	8	8	17	9	6	18	5	16	5	ENSRNOG00000071134	120096151	12	4055802	4055919	+	rRNA	NA	NA	NA	NA	NA	NA
5_8S_rRNA	3	6	3	6	3	5	1	6	1	ENSRNOG00000052008	120093061	11	62963	63115	-	rRNA	NA	NA	NA	NA	NA	NA
5_8S_rRNA	3	6	3	6	3	5	1	6	1	ENSRNOG00000063154	120102558	4	4013450	4013602	+	rRNA	NA	NA	NA	NA	NA	NA
5_8S_rRNA	3	6	3	6	3	5	1	6	1	ENSRNOG00000063335	120102580	4	2953693	2953845	-	rRNA	NA	NA	NA	NA	NA	NA
5_8S_rRNA	3	6	3	6	3	5	1	6	1	ENSRNOG00000063349	120101153	2	719524	719677	+	rRNA	NA	NA	NA	NA	NA	NA
5_8S_rRNA	3	6	3	6	3	5	1	6	1	ENSRNOG00000063407	120101142	2	1237182	1237334	+	rRNA	NA	NA	NA	NA	NA	NA
5_8S_rRNA	3	6	3	6	3	5	1	6	1	ENSRNOG00000064178	120101186	2	2427576	2427728	+	rRNA	NA	NA	NA	NA	NA	NA
5_8S_rRNA	3	6	3	6	3	5	1	6	1	ENSRNOG00000064311	120101968	3	3018943	3019095	+	rRNA	NA	NA	NA	NA	NA	NA
5_8S_rRNA	3	6	3	6	3	5	1	6	1	ENSRNOG00000064606	120102635	4	2877944	2878097	+	rRNA	NA	NA	NA	NA	NA	NA
5_8S_rRNA	3	6	3	6	3	5	1	6	1	ENSRNOG00000064733	120101197	2	372751	372904	+	rRNA	NA	NA	NA	NA	NA	NA
5_8S_rRNA	3	6	3	6	3	5	1	6	1	ENSRNOG00000064856	120101393	2	1362812	1362964	+	rRNA	NA	NA	NA	NA	NA	NA
5_8S_rRNA	3	6	3	6	3	5	1	6	1	ENSRNOG00000066190	120102569	4	749258	749410	-	rRNA	NA	NA	NA	NA	NA	NA
5_8S_rRNA	3	6	3	6	3	5	1	6	1	ENSRNOG00000066911	120102646	4	1929884	1930037	+	rRNA	NA	NA	NA	NA	NA	NA
5_8S_rRNA	3	6	3	6	3	5	1	6	1	ENSRNOG00000067251	120102591	4	494813	494965	-	rRNA	NA	NA	NA	NA	NA	NA
5_8S_rRNA	3	6	3	6	3	5	1	6	1	ENSRNOG00000067403	120102613	4	1546402	1546554	+	rRNA	NA	NA	NA	NA	NA	NA
5_8S_rRNA	3	6	3	6	3	5	1	6	1	ENSRNOG00000067463	120095374	10	167840	167992	+	rRNA	NA	NA	NA	NA	NA	NA
5_8S_rRNA	3	6	3	6	3	5	1	6	1	ENSRNOG00000067493	120101382	2	3556866	3557018	-	rRNA	NA	NA	NA	NA	NA	NA
5_8S_rRNA	3	6	3	6	3	5	1	6	1	ENSRNOG00000068043	120102624	4	1789102	1789254	+	rRNA	NA	NA	NA	NA	NA	NA
5_8S_rRNA	3	6	3	6	3	5	1	6	1	ENSRNOG00000068249	120101120	2	590062	590215	+	rRNA	NA	NA	NA	NA	NA	NA
5_8S_rRNA	3	6	3	6	3	5	1	6	1	ENSRNOG00000068370	120102761	4	598721	598874	-	rRNA	NA	NA	NA	NA	NA	NA
5_8S_rRNA	3	6	3	6	3	5	1	6	1	ENSRNOG00000068392	120102602	4	4738615	4738766	+	rRNA	NA	NA	NA	NA	NA	NA
5_8S_rRNA	3	6	3	6	3	5	1	6	1	ENSRNOG00000068704	120101164	2	61727	61880	-	rRNA	NA	NA	NA	NA	NA	NA
5_8S_rRNA	3	6	3	6	3	5	1	6	1	ENSRNOG00000068904	120101316	2	954583	954735	+	rRNA	NA	NA	NA	NA	NA	NA
5_8S_rRNA	3	6	3	6	3	5	1	6	1	ENSRNOG00000069225	120103191	5	71212	71364	-	rRNA	NA	NA	NA	NA	NA	NA
5_8S_rRNA	3	6	3	6	3	5	1	6	1	ENSRNOG00000069242	120101131	2	788239	788392	-	rRNA	NA	NA	NA	NA	NA	NA
5_8S_rRNA	3	6	3	6	3	5	1	6	1	ENSRNOG00000069816	120101109	2	2073612	2073764	-	rRNA	NA	NA	NA	NA	NA	NA
5_8S_rRNA	3	6	3	6	3	5	1	6	1	ENSRNOG00000069960	120101957	3	2234750	2234902	+	rRNA	NA	NA	NA	NA	NA	NA
5_8S_rRNA	3	6	3	6	3	5	1	6	1	ENSRNOG00000070537	120101979	3	3031454	3031606	-	rRNA	NA	NA	NA	NA	NA	NA
5_8S_rRNA	3	6	3	6	3	5	1	6	1	ENSRNOG00000070547	120102772	4	3916580	3916732	+	rRNA	NA	NA	NA	NA	NA	NA
5_8S_rRNA	3	6	3	6	3	5	1	6	1	ENSRNOG00000070998	120101175	2	3046721	3046873	-	rRNA	NA	NA	NA	NA	NA	NA
6030468B19Rik	0	0	0	0	0	1	0	0	0	ENSRNOG00000045889	688282	10	103016505	103027407	+	protein_coding	GO:0002313|mature B cell differentiation involved in immune response;GO:0007166|cell surface receptor signaling pathway;GO:2000558|positive regulation of immunoglobulin production in mucosal tissue;	GO:0005615|extracellular space;GO:0005886|plasma membrane;	GO:0004888|transmembrane signaling receptor activity;	NA	NA	NA
6330403K07Rik	402	362	369	335	351	320	460	390	389	ENSRNOG00000059827	691995	10	55755612	55757162	-	protein_coding	NA	GO:0016020|membrane;	NA	NA	NA	NA
6330411D24Rik	0	0	0	0	0	0	0	0	0	ENSRNOG00000065736	NA	5	155139220	155381086	-	protein_coding	NA	NA	NA	NA	NA	NA
A030014E15Rik	1	2	1	2	0	1	1	0	0	ENSRNOG00000066070	NA	9	84206732	84207088	+	protein_coding	NA	NA	NA	NA	NA	NA
A130010J15Rik	84	68	91	52	65	67	118	89	64	ENSRNOG00000005558	100125367	13	104692824	104695470	+	protein_coding	NA	NA	NA	NA	NA	NA
A1bg	1	0	3	1	2	0	0	0	2	ENSRNOG00000004692	140656	7	92494372	92498097	-	protein_coding	GO:0008150|biological_process;	GO:0005576|extracellular region;GO:0005886|plasma membrane;	GO:0003674|molecular_function;	NA	NA	NA
A1cf	0	0	0	0	0	0	0	0	0	ENSRNOG00000033195	170912	1	229736106	229824354	+	protein_coding	GO:0006397|mRNA processing;GO:0007566|embryo implantation;GO:0010609|mRNA localization resulting in post-transcriptional regulation of gene expression;GO:0016554|cytidine to uridine editing;GO:0016556|mRNA modification;GO:0050714|positive regulation of protein secretion;GO:0050821|protein stabilization;GO:2000623|negative regulation of nuclear-transcribed mRNA catabolic process, nonsense-mediated…	GO:0000792|heterochromatin;GO:0005634|nucleus;GO:0005654|nucleoplasm;GO:0005737|cytoplasm;GO:0005783|endoplasmic reticulum;GO:0030895|apolipoprotein B mRNA editing enzyme complex;GO:0045293|mRNA editing complex;	GO:0003723|RNA binding;GO:0003727|single-stranded RNA binding;GO:0003729|mRNA binding;GO:0005515|protein binding;	NA	NA	NA
A2m	517	424	490	419	426	450	2045	1670	1513	ENSRNOG00000028896	24153	4	154897877	154947786	+	protein_coding	GO:0001553|luteinization;GO:0001869|negative regulation of complement activation, lectin pathway;GO:0002438|acute inflammatory response to antigenic stimulus;GO:0006953|acute-phase response;GO:0007584|response to nutrient;GO:0009611|response to wounding;GO:0010037|response to carbon dioxide;GO:0010466|negative regulation of peptidase activity;GO:0010951|negative regulation of endopeptidase activi…	GO:0005615|extracellular space;	GO:0002020|protease binding;GO:0004866|endopeptidase inhibitor activity;GO:0004867|serine-type endopeptidase inhibitor activity;GO:0005102|signaling receptor binding;GO:0019838|growth factor binding;GO:0019899|enzyme binding;GO:0019959|interleukin-8 binding;GO:0019966|interleukin-1 binding;GO:0042802|identical protein binding;GO:0043120|tumor necrosis factor binding;GO:0048306|calcium-dependent p…	K03910|alpha-2-macroglobulin;	rno04610;	Complement and coagulation cascades;
A2ml1	0	0	0	0	0	0	0	0	0	ENSRNOG00000007247	362442	4	161814708	161857343	-	protein_coding	GO:0010466|negative regulation of peptidase activity;	GO:0005615|extracellular space;	GO:0004867|serine-type endopeptidase inhibitor activity;	NA	NA	NA
A3galt2	237	206	228	201	173	233	485	385	320	ENSRNOG00000005935	171553	5	141107983	141115641	+	protein_coding	GO:0005975|carbohydrate metabolic process;GO:0006688|glycosphingolipid biosynthetic process;GO:0030259|lipid glycosylation;GO:0071287|cellular response to manganese ion;	GO:0005794|Golgi apparatus;GO:0016020|membrane;GO:0031982|vesicle;GO:0032580|Golgi cisterna membrane;	GO:0001962|alpha-1,3-galactosyltransferase activity;GO:0016757|glycosyltransferase activity;GO:0016758|hexosyltransferase activity;GO:0046872|metal ion binding;GO:0047276|N-acetyllactosaminide 3-alpha-galactosyltransferase activity;	K20736|alpha-1,3-galactosyltransferase 2 [EC:2.4.1.87];K20736|alpha-1,3-galactosyltransferase 2 [EC:2.4.1.87];	rno00603;rno01100;	Glycosphingolipid biosynthesis - globo and isoglobo series;Metabolic pathways;
A4galt	0	0	0	0	0	0	0	0	0	ENSRNOG00000009736	63888	7	114368276	114396071	-	protein_coding	GO:0001576|globoside biosynthetic process;GO:0006493|protein O-linked glycosylation;GO:0007009|plasma membrane organization;	GO:0000139|Golgi membrane;GO:0016020|membrane;	GO:0008375|acetylglucosaminyltransferase activity;GO:0008378|galactosyltransferase activity;GO:0015643|toxic substance binding;GO:0050512|lactosylceramide 4-alpha-galactosyltransferase activity;	K01988|lactosylceramide 4-alpha-galactosyltransferase [EC:2.4.1.228];K01988|lactosylceramide 4-alpha-galactosyltransferase [EC:2.4.1.228];K01988|lactosylceramide 4-alpha-galactosyltransferase [EC:2.4.1.228];	rno00601;rno00603;rno01100;	Glycosphingolipid biosynthesis - lacto and neolacto series;Glycosphingolipid biosynthesis - globo and isoglobo series;Metabolic pathways;
A4gnt	0	0	0	0	0	0	0	0	0	ENSRNOG00000042649	685758	8	100172104	100178569	+	protein_coding	GO:0006493|protein O-linked glycosylation;GO:0008150|biological_process;GO:0009101|glycoprotein biosynthetic process;GO:0050673|epithelial cell proliferation;GO:0050680|negative regulation of epithelial cell proliferation;	GO:0000139|Golgi membrane;GO:0005575|cellular_component;	GO:0003674|molecular_function;GO:0008375|acetylglucosaminyltransferase activity;	NA	NA	NA
AA926063	1	1	2	0	0	2	1	0	1	ENSRNOG00000000478	NA	20	4981263	4981668	-	protein_coding	NA	NA	NA	NA	NA	NA
AA986860	6	2	3	4	3	0	3	1	7	ENSRNOG00000004341	498222	13	42188609	42201426	+	protein_coding	NA	GO:0005737|cytoplasm;GO:0005829|cytosol;GO:0005886|plasma membrane;	NA	NA	NA	NA
AABR07000137.1	0	0	0	0	0	0	0	0	0	ENSRNOG00000050129	NA	1	1307185	1308310	+	protein_coding	NA	NA	NA	NA	NA	NA
AABR07000158.1	0	0	0	0	0	0	0	0	0	ENSRNOG00000042852	NA	1	1588152	1590424	+	protein_coding	NA	NA	NA	NA	NA	NA
AABR07000158.2	0	0	0	0	0	0	0	0	0	ENSRNOG00000061806	120100385	1	1316463	1316584	-	snoRNA	NA	NA	NA	NA	NA	NA
AABR07000159.4	0	0	0	0	0	0	1	0	0	ENSRNOG00000055877	NA	1	2046074	2046678	-	protein_coding	NA	NA	NA	NA	NA	NA
AABR07000222.1	28	29	13	21	9	30	15	13	20	ENSRNOG00000014431	498977	1	5527048	5527608	-	protein_coding	GO:0061640|cytoskeleton-dependent cytokinesis;	GO:0005869|dynactin complex;	NA	NA	NA	NA
AABR07000239.1	0	0	0	0	0	0	0	0	0	ENSRNOG00000054906	120100424	1	6005785	6005914	+	snoRNA	NA	NA	NA	NA	NA	NA
AABR07000247.1	0	0	0	0	0	0	0	0	0	ENSRNOG00000058048	120100351	1	6308354	6308480	+	snoRNA	NA	NA	NA	NA	NA	NA
AABR07000276.1	0	0	1	2	1	0	0	0	0	ENSRNOG00000016624	NA	1	8030312	8030995	-	pseudogene	NA	NA	NA	NA	NA	NA
AABR07000292.1	1	2	1	4	1	1	0	0	1	ENSRNOG00000011399	100912436	1	8684189	8685037	-	protein_coding	NA	GO:0016020|membrane;	NA	NA	NA	NA
AABR07000304.1	0	0	0	0	0	0	0	0	0	ENSRNOG00000059930	120100430	1	9383523	9383653	+	snoRNA	NA	NA	NA	NA	NA	NA
AABR07000497.1	1	0	0	0	1	0	0	3	4	ENSRNOG00000054452	120100374	1	14828587	14828721	-	snoRNA	NA	NA	NA	NA	NA	NA
AABR07000521.1	0	0	0	0	0	0	0	0	0	ENSRNOG00000058518	120100369	1	15679169	15679309	+	snoRNA	NA	NA	NA	NA	NA	NA
AABR07000544.1	48	46	27	43	46	36	50	35	51	ENSRNOG00000055971	NA	1	16724591	16740168	+	lncRNA	NA	NA	NA	NA	NA	NA
AABR07000583.1	0	0	0	0	0	0	0	0	0	ENSRNOG00000046438	NA	1	17691637	17692974	-	protein_coding	NA	NA	NA	NA	NA	NA
AABR07000631.1	0	0	0	0	0	0	0	0	0	ENSRNOG00000053931	120100396	1	19381437	19381570	+	snRNA	NA	NA	NA	NA	NA	NA
AABR07000658.1	173	170	173	146	164	134	46	65	139	ENSRNOG00000054921	120100438	1	20119766	20119889	+	snoRNA	NA	NA	NA	NA	NA	NA
AABR07000658.1	173	170	173	146	164	134	46	65	139	ENSRNOG00000055111	100364016	1	20099733	20101248	-	protein_coding	GO:0010033|response to organic substance;GO:0044772|mitotic cell cycle phase transition;	NA	GO:0016538|cyclin-dependent protein serine/threonine kinase regulator activity;GO:0019901|protein kinase binding;	K21770|G2/mitotic-specific cyclin-B2;K21770|G2/mitotic-specific cyclin-B2;K21770|G2/mitotic-specific cyclin-B2;K21770|G2/mitotic-specific cyclin-B2;K21770|G2/mitotic-specific cyclin-B2;K21770|G2/mitotic-specific cyclin-B2;K21770|G2/mitotic-specific cyclin-B2;K21770|G2/mitotic-specific cyclin-B2;	rno04068;rno04110;rno04114;rno04115;rno04218;rno04914;rno05166;rno05170;	FoxO signaling pathway;Cell cycle;Oocyte meiosis;p53 signaling pathway;Cellular senescence;Progesterone-mediated oocyte maturation;Human T-cell leukemia virus 1 infection;Human immunodeficiency virus 1 infection;
AABR07000900.1	0	0	0	0	0	0	0	0	0	ENSRNOG00000052712	120100455	1	25264927	25265029	-	snoRNA	NA	NA	NA	NA	NA	NA
AABR07000968.2	0	0	0	0	0	0	0	0	0	ENSRNOG00000060033	120100449	1	27618984	27619106	+	snoRNA	NA	NA	NA	NA	NA	NA
AABR07000989.1	0	0	0	0	0	0	0	0	0	ENSRNOG00000061741	NA	1	28701045	28701383	+	protein_coding	NA	NA	NA	NA	NA	NA
AABR07000990.1	0	0	0	0	0	0	0	0	0	ENSRNOG00000054845	120100446	1	28741639	28741754	+	snoRNA	NA	NA	NA	NA	NA	NA
AABR07001001.1	0	2	0	0	1	0	3	0	0	ENSRNOG00000051415	120100379	1	29367274	29367411	-	snoRNA	NA	NA	NA	NA	NA	NA
AABR07001054.1	0	0	0	0	0	1	0	0	0	ENSRNOG00000055337	120099033	1	33246387	33360293	-	lncRNA	NA	NA	NA	NA	NA	NA
AABR07001060.1	1	0	0	0	0	0	2	0	0	ENSRNOG00000052644	120100362	1	33716713	33716842	-	snoRNA	NA	NA	NA	NA	NA	NA
AABR07001064.1	143	139	129	127	113	107	115	111	136	ENSRNOG00000017678	680107	1	34291930	34295752	-	protein_coding	GO:0006886|intracellular protein transport;GO:0016192|vesicle-mediated transport;	GO:0030131|clathrin adaptor complex;	GO:0030276|clathrin binding;	NA	NA	NA
AABR07001348.1	0	0	0	0	0	0	0	0	0	ENSRNOG00000023081	NA	1	39668472	39670153	-	protein_coding	NA	NA	NA	NA	NA	NA
AABR07001379.1	0	0	0	0	0	0	0	0	0	ENSRNOG00000055223	120100474	1	41296869	41296962	-	snoRNA	NA	NA	NA	NA	NA	NA
AABR07001406.1	2	1	4	2	1	1	0	2	1	ENSRNOG00000055161	120100394	1	42212190	42212259	+	snoRNA	NA	NA	NA	NA	NA	NA
AABR07001406.2	2	4	2	3	0	0	0	2	1	ENSRNOG00000059321	120100395	1	42211968	42212047	+	snoRNA	NA	NA	NA	NA	NA	NA
AABR07001408.1	0	0	0	0	0	0	0	0	0	ENSRNOG00000033265	NA	1	42487145	42487429	-	protein_coding	NA	NA	NA	NA	NA	NA
AABR07001416.1	0	0	0	0	0	0	0	0	0	ENSRNOG00000059050	NA	7	132758366	132762047	+	protein_coding	NA	NA	NA	NA	NA	NA
AABR07001435.1	5	5	5	5	4	6	4	4	1	ENSRNOG00000004144	NA	1	43640876	43641875	-	protein_coding	NA	NA	NA	NA	NA	NA
AABR07001512.1	2	3	0	4	4	4	1	1	0	ENSRNOG00000017412	NA	1	48369044	48369595	-	protein_coding	NA	NA	NA	NA	NA	NA
AABR07001519.1	26	39	19	29	24	20	25	47	46	ENSRNOG00000055547	56816	1	48690556	49882555	-	protein_coding	GO:0000122|negative regulation of transcription by RNA polymerase II;GO:0000209|protein polyubiquitination;GO:0000266|mitochondrial fission;GO:0000422|autophagy of mitochondrion;GO:0000423|mitophagy;GO:0001933|negative regulation of protein phosphorylation;GO:0001963|synaptic transmission, dopaminergic;GO:0001964|startle response;GO:0006511|ubiquitin-dependent protein catabolic process;GO:0006513…	GO:0000139|Golgi membrane;GO:0000151|ubiquitin ligase complex;GO:0005634|nucleus;GO:0005737|cytoplasm;GO:0005739|mitochondrion;GO:0005741|mitochondrial outer membrane;GO:0005783|endoplasmic reticulum;GO:0005789|endoplasmic reticulum membrane;GO:0005794|Golgi apparatus;GO:0005829|cytosol;GO:0008021|synaptic vesicle;GO:0014069|postsynaptic density;GO:0016235|aggresome;GO:0016607|nuclear speck;GO:00…	GO:0001664|G protein-coupled receptor binding;GO:0003714|transcription corepressor activity;GO:0003779|actin binding;GO:0004842|ubiquitin-protein transferase activity;GO:0005515|protein binding;GO:0008013|beta-catenin binding;GO:0015631|tubulin binding;GO:0016874|ligase activity;GO:0019899|enzyme binding;GO:0019900|kinase binding;GO:0019901|protein kinase binding;GO:0030165|PDZ domain binding;GO:…	K04556|parkin [EC:2.3.2.31];K04556|parkin [EC:2.3.2.31];K04556|parkin [EC:2.3.2.31];K04556|parkin [EC:2.3.2.31];K04556|parkin [EC:2.3.2.31];K04556|parkin [EC:2.3.2.31];	rno04120;rno04137;rno04141;rno05012;rno05014;rno05022;	Ubiquitin mediated proteolysis;Mitophagy - animal;Protein processing in endoplasmic reticulum;Parkinson disease;Amyotrophic lateral sclerosis;Pathways of neurodegeneration - multiple diseases;
AABR07001573.1	0	0	0	0	0	0	0	0	0	ENSRNOG00000052521	120093055	1	52648274	52648388	-	scaRNA	NA	NA	NA	NA	NA	NA
AABR07001592.2	3	4	2	2	2	5	0	0	0	ENSRNOG00000058564	NA	1	53854235	53871769	-	protein_coding	NA	NA	NA	NA	NA	NA
AABR07001807.2	0	0	0	0	0	0	0	0	0	ENSRNOG00000061593	120100349	1	57317861	57318000	+	snoRNA	NA	NA	NA	NA	NA	NA
AABR07001902.1	2	2	3	1	3	1	1	5	4	ENSRNOG00000042547	NA	1	61493819	61494744	+	protein_coding	NA	NA	NA	NA	NA	NA
AABR07001910.1	71	71	72	98	66	78	107	114	89	ENSRNOG00000051570	102547235	1	61865571	61902792	-	protein_coding	GO:0006355|regulation of DNA-templated transcription;GO:0045944|positive regulation of transcription by RNA polymerase II;	NA	GO:0046872|metal ion binding;	NA	NA	NA
AABR07001923.1	0	0	0	0	0	0	0	0	0	ENSRNOG00000047884	NA	1	61789774	61868888	+	protein_coding	NA	NA	NA	NA	NA	NA
AABR07001926.1	1	0	1	1	4	5	7	3	2	ENSRNOG00000028767	682225	1	62509056	62528102	-	protein_coding	NA	NA	GO:0046872|metal ion binding;	NA	NA	NA
AABR07001926.3	235	205	220	233	206	198	188	209	313	ENSRNOG00000061533	100362641	1	62631812	62702799	-	protein_coding	GO:0006355|regulation of DNA-templated transcription;GO:0045944|positive regulation of transcription by RNA polymerase II;	NA	GO:0046872|metal ion binding;	NA	NA	NA
AABR07001942.1	14	4	3	3	1	2	1	2	0	ENSRNOG00000055124	NA	1	62903418	62949645	-	lncRNA	NA	NA	NA	NA	NA	NA
AABR07002025.1	0	0	0	0	0	0	0	0	0	ENSRNOG00000054417	NA	1	62256801	62257942	-	protein_coding	NA	NA	NA	NA	NA	NA
AABR07002065.2	156	157	162	146	119	138	142	161	135	ENSRNOG00000060429	102552463	1	73601759	73612685	+	protein_coding	GO:0006355|regulation of DNA-templated transcription;	GO:0005634|nucleus;	GO:0003677|DNA binding;GO:0042802|identical protein binding;GO:0046872|metal ion binding;	NA	NA	NA
AABR07002066.2	0	0	0	0	0	0	1	0	0	ENSRNOG00000051968	NA	1	73550741	73552612	+	lncRNA	NA	NA	NA	NA	NA	NA
AABR07002093.1	8	5	4	5	8	1	5	6	12	ENSRNOG00000019280	691722	1	73025988	73049736	+	protein_coding	NA	GO:0016020|membrane;	NA	NA	NA	NA
AABR07002093.2	0	0	0	0	0	0	0	0	0	ENSRNOG00000048663	NA	1	73073396	73106385	-	protein_coding	NA	NA	NA	NA	NA	NA
AABR07002140.2	0	0	0	0	0	0	0	0	0	ENSRNOG00000032062	308353	1	72505157	72505474	+	protein_coding	GO:0006412|translation;	GO:0005737|cytoplasm;GO:0005840|ribosome;GO:1990904|ribonucleoprotein complex;	GO:0003735|structural constituent of ribosome;	K02929|large subunit ribosomal protein L44e;K02929|large subunit ribosomal protein L44e;	rno03010;rno05171;	Ribosome;Coronavirus disease - COVID-19;
AABR07002209.1	0	0	0	0	0	0	0	0	0	ENSRNOG00000062307	100910123	1	961223	1074280	-	protein_coding	GO:0007186|G protein-coupled receptor signaling pathway;	GO:0005886|plasma membrane;GO:0016020|membrane;	GO:0004930|G protein-coupled receptor activity;	NA	NA	NA
AABR07002351.1	0	0	0	0	0	0	0	0	0	ENSRNOG00000038674	292572	1	68133886	68152636	+	protein_coding	GO:0006468|protein phosphorylation;	NA	GO:0004674|protein serine/threonine kinase activity;GO:0005524|ATP binding;	NA	NA	NA
AABR07002351.2	0	0	0	0	0	0	0	0	0	ENSRNOG00000060136	120098145	1	68202754	68204452	+	protein_coding	GO:0006357|regulation of transcription by RNA polymerase II;	GO:0005634|nucleus;	GO:0000981|DNA-binding transcription factor activity, RNA polymerase II-specific;GO:0003677|DNA binding;	NA	NA	NA
AABR07002353.2	0	0	0	0	0	0	0	0	0	ENSRNOG00000053141	NA	1	68356299	68356778	-	pseudogene	NA	NA	NA	NA	NA	NA
AABR07002384.1	0	0	0	0	0	0	0	0	0	ENSRNOG00000046037	NA	1	68809116	68809523	-	pseudogene	NA	NA	NA	NA	NA	NA
AABR07002467.1	0	0	0	0	0	0	0	0	0	ENSRNOG00000038479	367480	1	71907881	71954362	-	protein_coding	GO:0007186|G protein-coupled receptor signaling pathway;	NA	NA	NA	NA	NA
AABR07002473.1	0	0	0	0	0	0	0	0	0	ENSRNOG00000046339	289295	1	70984379	71007229	+	protein_coding	GO:0007186|G protein-coupled receptor signaling pathway;	NA	NA	NA	NA	NA
AABR07002505.1	0	0	0	0	0	0	0	0	0	ENSRNOG00000056605	120100453	1	74797201	74797324	+	snoRNA	NA	NA	NA	NA	NA	NA
AABR07002546.1	3	4	7	2	2	8	10	3	9	ENSRNOG00000048028	NA	1	75385736	75387750	-	pseudogene	NA	NA	NA	NA	NA	NA
AABR07002622.1	0	0	0	0	0	0	0	0	0	ENSRNOG00000038276	NA	1	76426358	76427521	+	protein_coding	NA	NA	NA	NA	NA	NA
AABR07002623.1	0	0	0	0	0	0	0	0	0	ENSRNOG00000038251	292625	1	76577929	76580090	+	protein_coding	NA	NA	NA	NA	NA	NA
AABR07002627.1	6	27	43	6	16	19	10	12	13	ENSRNOG00000060587	NA	1	76911602	76914024	-	protein_coding	NA	NA	NA	NA	NA	NA
AABR07002659.1	0	0	0	0	0	0	0	0	0	ENSRNOG00000034000	120098290	1	78028093	78037459	+	protein_coding	NA	GO:0016020|membrane;	NA	NA	NA	NA
AABR07002683.1	0	0	0	0	0	0	0	1	0	ENSRNOG00000054609	NA	1	79715896	79723832	+	lncRNA	NA	NA	NA	NA	NA	NA
AABR07002689.1	6	1	5	1	1	6	3	3	4	ENSRNOG00000050032	100363433	1	80103042	80104777	-	protein_coding	NA	NA	NA	NA	NA	NA
AABR07002774.1	96	94	74	79	60	67	81	62	27	ENSRNOG00000018928	102553760	1	83194775	83223764	-	protein_coding	GO:0006355|regulation of DNA-templated transcription;	NA	GO:0046872|metal ion binding;	NA	NA	NA
AABR07002774.4	172	140	155	160	152	168	200	164	121	ENSRNOG00000050995	102554136	1	83094305	83140793	+	protein_coding	GO:0006355|regulation of DNA-templated transcription;GO:0045944|positive regulation of transcription by RNA polymerase II;	NA	GO:0046872|metal ion binding;	NA	NA	NA
AABR07002782.1	0	0	0	0	0	0	0	0	0	ENSRNOG00000054568	NA	1	84898135	84901405	+	protein_coding	NA	NA	NA	NA	NA	NA
AABR07002783.1	0	0	0	0	0	0	0	0	0	ENSRNOG00000054618	NA	1	84871909	84892429	+	protein_coding	NA	NA	NA	NA	NA	NA
AABR07002784.1	46	33	48	42	54	39	82	77	58	ENSRNOG00000053366	685610	1	83309355	83330251	-	protein_coding	NA	NA	GO:0046872|metal ion binding;	K09228|KRAB domain-containing zinc finger protein;	rno05168;	Herpes simplex virus 1 infection;
AABR07002788.1	18	12	16	12	30	17	9	9	7	ENSRNOG00000055387	120100461	1	83643919	83644044	+	snoRNA	NA	NA	NA	NA	NA	NA
AABR07002835.1	0	0	0	0	0	0	0	0	0	ENSRNOG00000031073	100312678	1	59547693	59548587	+	pseudogene	NA	NA	NA	NA	NA	NA
AABR07002848.1	83	60	98	70	78	56	128	127	97	ENSRNOG00000050453	499114	1	83965986	83987778	+	protein_coding	GO:0016567|protein ubiquitination;	GO:0005737|cytoplasm;GO:0019005|SCF ubiquitin ligase complex;	NA	NA	NA	NA
AABR07002868.1	74	59	76	67	72	76	92	118	72	ENSRNOG00000055519	308482	1	85004920	85015478	+	protein_coding	GO:0000122|negative regulation of transcription by RNA polymerase II;	NA	GO:0001227|DNA-binding transcription repressor activity, RNA polymerase II-specific;GO:0046872|metal ion binding;	K09228|KRAB domain-containing zinc finger protein;	rno05168;	Herpes simplex virus 1 infection;
AABR07002870.2	17	15	39	30	14	16	43	37	35	ENSRNOG00000056062	100912787	1	85071905	85082919	-	protein_coding	GO:0006355|regulation of DNA-templated transcription;	NA	GO:0046872|metal ion binding;	K09228|KRAB domain-containing zinc finger protein;	rno05168;	Herpes simplex virus 1 infection;
AABR07002938.1	24	25	26	17	33	25	11	11	13	ENSRNOG00000037415	NA	1	86665907	86667858	-	pseudogene	NA	NA	NA	NA	NA	NA
AABR07002945.2	0	0	0	0	0	0	0	0	0	ENSRNOG00000051284	NA	10	92434319	92434749	+	pseudogene	NA	NA	NA	NA	NA	NA
AABR07002945.4	0	0	1	0	1	1	0	2	0	ENSRNOG00000061556	120100477	1	86758702	86758828	-	snoRNA	NA	NA	NA	NA	NA	NA
AABR07002969.1	322	331	405	322	349	341	597	498	645	ENSRNOG00000052945	292808	1	87536609	87681231	+	protein_coding	GO:0006508|proteolysis;GO:0030574|collagen catabolic process;	NA	GO:0008233|peptidase activity;GO:0030145|manganese ion binding;GO:0070006|metalloaminopeptidase activity;GO:0102009|proline dipeptidase activity;	NA	NA	NA
AABR07003049.1	4	1	4	5	16	12	1	10	8	ENSRNOG00000037364	100362023	1	91287876	91288130	+	protein_coding	GO:0006909|phagocytosis;GO:0008360|regulation of cell shape;GO:0035023|regulation of Rho protein signal transduction;	GO:0005856|cytoskeleton;GO:0005886|plasma membrane;	GO:0031267|small GTPase binding;	NA	NA	NA
AABR07003173.1	0	2	2	2	1	2	8	1	1	ENSRNOG00000037360	NA	1	93016530	93017532	-	pseudogene	NA	NA	NA	NA	NA	NA
AABR07003176.1	68	73	81	86	70	70	86	79	61	ENSRNOG00000014380	102555672	1	93173713	93197478	+	protein_coding	GO:0045944|positive regulation of transcription by RNA polymerase II;	NA	NA	K09228|KRAB domain-containing zinc finger protein;	rno05168;	Herpes simplex virus 1 infection;
AABR07003187.1	14	15	27	14	9	15	21	12	14	ENSRNOG00000037348	120099798	1	93693837	93694943	-	protein_coding	GO:0090503|RNA phosphodiester bond hydrolysis, exonucleolytic;	NA	GO:0000175|3'-5'-RNA exonuclease activity;GO:0003676|nucleic acid binding;	NA	NA	NA
AABR07003241.3	0	0	0	0	0	0	0	0	0	ENSRNOG00000055194	NA	1	94602120	94603186	-	protein_coding	NA	NA	NA	NA	NA	NA
AABR07003273.1	0	1	0	0	0	0	0	0	1	ENSRNOG00000050257	NA	1	97568938	97569371	+	protein_coding	NA	NA	NA	NA	NA	NA
AABR07003302.1	0	0	0	0	0	0	0	0	0	ENSRNOG00000058668	NA	1	98433780	98434019	-	protein_coding	NA	NA	NA	NA	NA	NA
AABR07003537.1	879	783	908	797	795	761	758	810	727	ENSRNOG00000021484	NA	1	106622141	106623699	+	protein_coding	NA	NA	NA	NA	NA	NA
AABR07003610.1	0	0	0	0	0	0	0	0	0	ENSRNOG00000047696	690816	1	63917504	63948873	+	protein_coding	GO:0007186|G protein-coupled receptor signaling pathway;	GO:0005886|plasma membrane;	GO:0004930|G protein-coupled receptor activity;	NA	NA	NA
AABR07004061.1	0	0	0	0	0	0	0	0	0	ENSRNOG00000051782	102548067	1	116311960	116447353	-	protein_coding	NA	NA	NA	NA	NA	NA
AABR07004112.1	55	43	38	36	34	37	29	45	56	ENSRNOG00000016498	NA	1	118609714	118612368	+	protein_coding	NA	NA	NA	NA	NA	NA
AABR07004134.1	0	0	0	0	0	0	0	0	1	ENSRNOG00000056928	NA	1	119314109	119314510	-	protein_coding	NA	NA	NA	NA	NA	NA
AABR07004190.1	0	0	0	0	0	0	0	0	0	ENSRNOG00000049257	102551255	1	122232253	122234290	+	protein_coding	NA	NA	NA	NA	NA	NA
AABR07004232.1	0	0	0	0	0	0	0	0	1	ENSRNOG00000048904	NA	1	18937773	18938846	+	protein_coding	NA	NA	NA	NA	NA	NA
AABR07004269.3	97	90	109	99	100	103	71	61	36	ENSRNOG00000051102	NA	1	127424015	127431922	+	pseudogene	NA	NA	NA	NA	NA	NA
AABR07004292.1	0	0	0	0	0	0	0	0	0	ENSRNOG00000051333	100360396	1	128028275	128028628	+	protein_coding	GO:0006412|translation;	GO:0005737|cytoplasm;GO:0005840|ribosome;	GO:0003735|structural constituent of ribosome;	NA	NA	NA
AABR07004397.1	0	0	0	0	0	0	0	0	0	ENSRNOG00000030679	688615	9	20353464	20353688	-	processed_pseudogene	NA	NA	NA	NA	NA	NA
AABR07004442.1	0	0	0	0	1	0	0	0	0	ENSRNOG00000051409	120100372	1	135195011	135195135	-	snoRNA	NA	NA	NA	NA	NA	NA
AABR07004450.2	0	0	0	0	0	0	0	0	0	ENSRNOG00000054102	120100468	1	135499682	135499825	+	snoRNA	NA	NA	NA	NA	NA	NA
AABR07004481.2	0	0	0	0	0	0	0	0	0	ENSRNOG00000059239	120100361	1	136662596	136662746	-	snoRNA	NA	NA	NA	NA	NA	NA
AABR07004539.1	0	0	0	0	0	0	0	0	0	ENSRNOG00000056733	100912265	1	237078517	237169650	+	protein_coding	NA	NA	GO:0004497|monooxygenase activity;GO:0005506|iron ion binding;GO:0016705|oxidoreductase activity, acting on paired donors, with incorporation or reduction of molecular oxygen;GO:0020037|heme binding;	NA	NA	NA
AABR07004549.1	0	0	0	0	0	0	0	0	0	ENSRNOG00000059330	108348203	1	238352131	238504300	+	protein_coding	NA	NA	GO:0004497|monooxygenase activity;GO:0005506|iron ion binding;GO:0016705|oxidoreductase activity, acting on paired donors, with incorporation or reduction of molecular oxygen;GO:0020037|heme binding;	NA	NA	NA
AABR07004560.1	0	0	0	0	0	0	0	0	0	ENSRNOG00000046080	NA	1	238245325	238266249	+	protein_coding	NA	NA	NA	NA	NA	NA
AABR07004681.1	0	0	0	0	0	0	0	0	0	ENSRNOG00000013711	365304	1	140004210	140005140	+	pseudogene	NA	NA	NA	NA	NA	NA
AABR07004684.1	0	0	0	0	0	0	0	0	0	ENSRNOG00000033507	679945	1	140594348	140625529	+	protein_coding	GO:0007186|G protein-coupled receptor signaling pathway;	GO:0005886|plasma membrane;	GO:0004930|G protein-coupled receptor activity;	NA	NA	NA
AABR07004733.2	0	0	0	0	0	0	0	0	0	ENSRNOG00000058110	NA	1	150257195	150276211	-	lncRNA	NA	NA	NA	NA	NA	NA
AABR07004746.1	0	0	2	0	0	0	0	1	0	ENSRNOG00000022941	102549852	1	143810583	143810987	+	protein_coding	GO:0006826|iron ion transport;	NA	NA	NA	NA	NA
AABR07004803.1	0	0	0	0	0	0	0	0	0	ENSRNOG00000053994	120100425	1	147306143	147306271	-	snoRNA	NA	NA	NA	NA	NA	NA
AABR07004871.1	0	0	0	0	0	0	0	0	0	ENSRNOG00000058651	120100452	1	153237414	153237538	+	snoRNA	NA	NA	NA	NA	NA	NA
AABR07004876.1	6	1	8	2	7	1	5	3	0	ENSRNOG00000018083	NA	1	154141584	154142717	+	protein_coding	NA	NA	NA	NA	NA	NA
AABR07004881.1	44	36	44	56	45	47	37	30	15	ENSRNOG00000052319	NA	1	154618281	154618592	+	pseudogene	NA	NA	NA	NA	NA	NA
AABR07004891.1	0	0	0	0	0	0	0	0	0	ENSRNOG00000033196	NA	1	155502940	155505756	-	protein_coding	NA	NA	NA	NA	NA	NA
AABR07004966.1	0	0	0	0	0	0	0	0	0	ENSRNOG00000034061	499238	1	162580418	162581362	-	protein_coding	GO:0007186|G protein-coupled receptor signaling pathway;GO:0050911|detection of chemical stimulus involved in sensory perception of smell;	GO:0005886|plasma membrane;	GO:0004930|G protein-coupled receptor activity;	NA	NA	NA
AABR07004992.1	4	8	7	13	8	4	141	114	107	ENSRNOG00000052236	NA	1	160266806	160267183	-	processed_pseudogene	NA	NA	NA	NA	NA	NA
AABR07005004.1	27	37	18	29	20	20	8	13	10	ENSRNOG00000053089	120100352	1	163541736	163541866	+	snoRNA	NA	NA	NA	NA	NA	NA
AABR07005004.3	51	33	54	47	48	32	34	38	34	ENSRNOG00000055001	120100353	1	163540664	163540793	+	snoRNA	NA	NA	NA	NA	NA	NA
AABR07005031.1	32	39	58	34	42	49	122	147	228	ENSRNOG00000029082	499244	1	165377553	165378489	-	protein_coding	GO:0006826|iron ion transport;	NA	NA	NA	NA	NA
AABR07005031.3	0	0	0	0	0	0	0	0	0	ENSRNOG00000060840	NA	1	165348811	165362087	+	lncRNA	NA	NA	NA	NA	NA	NA
AABR07005040.1	0	0	0	0	0	0	0	0	1	ENSRNOG00000043512	120099907	1	166888513	166888812	-	protein_coding	NA	NA	NA	NA	NA	NA
AABR07005506.1	1	0	0	2	0	0	0	0	0	ENSRNOG00000025122	NA	1	168338500	168339520	-	protein_coding	NA	NA	NA	NA	NA	NA
AABR07005533.1	2	3	2	4	2	4	0	1	1	ENSRNOG00000020477	100911093	1	170721272	170722576	-	protein_coding	GO:0001680|tRNA 3'-terminal CCA addition;	NA	GO:0003723|RNA binding;GO:0016779|nucleotidyltransferase activity;	NA	NA	NA
AABR07005543.1	0	0	0	0	0	0	0	0	0	ENSRNOG00000059173	120100415	1	171168503	171168634	-	snoRNA	NA	NA	NA	NA	NA	NA
AABR07005564.1	0	0	0	0	0	0	0	0	0	ENSRNOG00000061992	NA	1	172338196	172338561	+	processed_pseudogene	NA	NA	NA	NA	NA	NA
AABR07005572.2	0	1	0	0	0	0	0	2	1	ENSRNOG00000062071	102548890	1	168627481	168627882	-	protein_coding	GO:0006412|translation;	GO:0005840|ribosome;GO:1990904|ribonucleoprotein complex;	GO:0003735|structural constituent of ribosome;	NA	NA	NA
AABR07005579.1	0	0	0	0	1	0	0	2	0	ENSRNOG00000055386	120100364	1	173170301	173170415	+	snoRNA	NA	NA	NA	NA	NA	NA
AABR07005579.2	0	0	0	1	0	0	0	0	0	ENSRNOG00000059323	120100373	1	173218181	173218293	-	snoRNA	NA	NA	NA	NA	NA	NA
AABR07005775.1	50	41	32	35	46	44	14	8	8	ENSRNOG00000047124	116601	1	181026608	181044838	-	protein_coding	GO:0006816|calcium ion transport;GO:0006874|intracellular calcium ion homeostasis;GO:0006937|regulation of muscle contraction;GO:0006942|regulation of striated muscle contraction;GO:0008637|apoptotic mitochondrial changes;GO:0015931|nucleobase-containing compound transport;GO:0031448|positive regulation of fast-twitch skeletal muscle fiber contraction;GO:0032470|positive regulation of endoplasmic…	GO:0005739|mitochondrion;GO:0005783|endoplasmic reticulum;GO:0005789|endoplasmic reticulum membrane;GO:0005793|endoplasmic reticulum-Golgi intermediate compartment;GO:0016020|membrane;GO:0016529|sarcoplasmic reticulum;GO:0031673|H zone;GO:0031674|I band;GO:0033017|sarcoplasmic reticulum membrane;GO:0043231|intracellular membrane-bounded organelle;GO:0048471|perinuclear region of cytoplasm;	GO:0005338|nucleotide-sugar transmembrane transporter activity;GO:0005388|P-type calcium transporter activity;GO:0005509|calcium ion binding;GO:0005515|protein binding;GO:0005524|ATP binding;GO:0016887|ATP hydrolysis activity;GO:0030899|calcium-dependent ATPase activity;GO:0042803|protein homodimerization activity;	K05853|P-type Ca2+ transporter type 2A [EC:7.2.2.10];K05853|P-type Ca2+ transporter type 2A [EC:7.2.2.10];K05853|P-type Ca2+ transporter type 2A [EC:7.2.2.10];K05853|P-type Ca2+ transporter type 2A [EC:7.2.2.10];K05853|P-type Ca2+ transporter type 2A [EC:7.2.2.10];K05853|P-type Ca2+ transporter type 2A [EC:7.2.2.10];K05853|P-type Ca2+ transporter type 2A [EC:7.2.2.10];K05853|P-type Ca2+ transport…	rno04020;rno04022;rno04024;rno04260;rno04261;rno04919;rno04972;rno05010;rno05017;rno05022;rno05410;rno05412;rno05414;rno05415;	Calcium signaling pathway;cGMP-PKG signaling pathway;cAMP signaling pathway;Cardiac muscle contraction;Adrenergic signaling in cardiomyocytes;Thyroid hormone signaling pathway;Pancreatic secretion;Alzheimer disease;Spinocerebellar ataxia;Pathways of neurodegeneration - multiple diseases;Hypertrophic cardiomyopathy;Arrhythmogenic right ventricular cardiomyopathy;Dilated cardiomyopathy;Diabetic car…
AABR07005779.1	470	457	472	441	432	385	355	329	454	ENSRNOG00000018518	691898	1	182084126	182089317	+	protein_coding	NA	GO:0005654|nucleoplasm;	NA	NA	NA	NA
AABR07005779.3	0	0	0	0	0	0	0	0	0	ENSRNOG00000054418	NA	1	181974569	181975823	+	pseudogene	NA	NA	NA	NA	NA	NA
AABR07005790.1	0	0	1	0	0	0	0	0	0	ENSRNOG00000051561	120100354	1	183310598	183310728	-	snoRNA	NA	NA	NA	NA	NA	NA
AABR07005790.2	0	0	0	0	0	0	0	0	0	ENSRNOG00000053512	120100487	1	183371628	183371752	-	snoRNA	NA	NA	NA	NA	NA	NA
AABR07005801.1	0	0	0	0	0	0	0	0	0	ENSRNOG00000056252	120100399	1	184576350	184576490	-	snoRNA	NA	NA	NA	NA	NA	NA
AABR07005806.1	0	0	0	0	0	0	0	0	0	ENSRNOG00000057653	NA	16	45883933	45884160	+	protein_coding	NA	NA	NA	NA	NA	NA
AABR07005821.1	2	0	0	0	0	0	0	0	0	ENSRNOG00000020560	170568	1	185617294	185696478	+	protein_coding	GO:0001824|blastocyst development;GO:0001833|inner cell mass cell proliferation;GO:0002065|columnar/cuboidal epithelial cell differentiation;GO:0006897|endocytosis;GO:0006898|receptor-mediated endocytosis;GO:0009611|response to wounding;GO:0009617|response to bacterium;GO:0010033|response to organic substance;GO:0015031|protein transport;GO:0030154|cell differentiation;GO:0030858|positive regulat…	GO:0005576|extracellular region;GO:0005615|extracellular space;GO:0005737|cytoplasm;GO:0016020|membrane;GO:0019898|extrinsic component of membrane;GO:0030658|transport vesicle membrane;GO:0030670|phagocytic vesicle membrane;GO:0031012|extracellular matrix;GO:0042589|zymogen granule membrane;GO:0062023|collagen-containing extracellular matrix;	GO:0001530|lipopolysaccharide binding;GO:0003674|molecular_function;GO:0003677|DNA binding;GO:0005044|scavenger receptor activity;GO:0035375|zymogen binding;GO:0038187|pattern recognition receptor activity;GO:0070891|lipoteichoic acid binding;GO:1904399|heparan sulfate binding;	K13912|deleted in malignant brain tumors 1 protein;	rno04970;	Salivary secretion;
AABR07005838.1	10	13	13	11	15	24	10	6	5	ENSRNOG00000020446	102555739	1	184215516	184300008	+	protein_coding	GO:0007059|chromosome segregation;GO:0051301|cell division;	GO:0000940|outer kinetochore;GO:0005737|cytoplasm;GO:0005876|spindle microtubule;	GO:0008017|microtubule binding;	NA	NA	NA
AABR07005844.1	1	0	0	0	0	0	0	0	0	ENSRNOG00000034038	100911413	1	185617480	185900277	+	protein_coding	GO:0006897|endocytosis;GO:0015031|protein transport;GO:0030154|cell differentiation;	GO:0005576|extracellular region;GO:0016020|membrane;	GO:0005044|scavenger receptor activity;	NA	NA	NA
AABR07005886.1	0	0	0	1	0	1	0	0	0	ENSRNOG00000053539	NA	1	186877655	186881977	+	protein_coding	NA	NA	NA	NA	NA	NA
AABR07005965.1	0	3	0	0	0	0	2	0	1	ENSRNOG00000055312	102552565	1	191980661	191986286	-	lncRNA	NA	NA	NA	NA	NA	NA
AABR07005985.1	0	0	0	0	0	0	0	0	0	ENSRNOG00000027374	499282	1	194403211	194482730	-	protein_coding	GO:0035082|axoneme assembly;GO:0060294|cilium movement involved in cell motility;	NA	NA	NA	NA	NA
AABR07006025.2	12	21	7	11	5	15	8	3	2	ENSRNOG00000057858	NA	1	196564574	196564915	-	protein_coding	NA	NA	NA	NA	NA	NA
AABR07006030.1	4	2	5	5	8	8	22	17	35	ENSRNOG00000046602	24572	1	196799517	196831756	+	protein_coding	GO:0002064|epithelial cell development;GO:0002068|glandular epithelial cell development;GO:0006915|apoptotic process;GO:0008285|negative regulation of cell population proliferation;GO:0009725|response to hormone;GO:0010273|detoxification of copper ion;GO:0030277|maintenance of gastrointestinal epithelium;GO:0030336|negative regulation of cell migration;GO:0032496|response to lipopolysaccharide;GO…	GO:0005576|extracellular region;GO:0005615|extracellular space;GO:0005634|nucleus;GO:0005737|cytoplasm;GO:0031012|extracellular matrix;GO:0070701|mucus layer;GO:0070702|inner mucus layer;GO:0070703|outer mucus layer;	GO:0005515|protein binding;GO:0042802|identical protein binding;GO:1903135|cupric ion binding;GO:1903136|cuprous ion binding;	K10955|mucin-2;K10955|mucin-2;	rno05146;rno05226;	Amoebiasis;Gastric cancer;
AABR07006032.1	0	0	0	0	0	0	0	2	0	ENSRNOG00000055996	682837	1	196864336	196896475	+	protein_coding	GO:0010193|response to ozone;GO:0010477|response to sulfur dioxide;GO:0030855|epithelial cell differentiation;GO:0032496|response to lipopolysaccharide;GO:0033189|response to vitamin A;GO:0036438|maintenance of lens transparency;GO:0048015|phosphatidylinositol-mediated signaling;GO:0071300|cellular response to retinoic acid;GO:0071364|cellular response to epidermal growth factor stimulus;GO:00713…	GO:0005615|extracellular space;GO:0005737|cytoplasm;GO:0070701|mucus layer;	GO:0003674|molecular_function;	K13908|mucin-5;K13908|mucin-5;	rno04657;rno04970;	IL-17 signaling pathway;Salivary secretion;
AABR07006049.1	0	0	0	0	0	0	0	0	0	ENSRNOG00000046649	NA	1	197254956	197356066	-	protein_coding	NA	NA	NA	NA	NA	NA
AABR07006081.1	0	0	0	0	0	0	0	1	0	ENSRNOG00000016597	NA	1	200972088	200972693	-	protein_coding	NA	NA	NA	NA	NA	NA
AABR07006089.1	0	0	0	0	0	0	0	0	0	ENSRNOG00000017872	120099971	1	201187962	201250204	+	protein_coding	GO:0006081|cellular aldehyde metabolic process;	NA	GO:0016620|oxidoreductase activity, acting on the aldehyde or oxo group of donors, NAD or NADP as acceptor;	K00129|aldehyde dehydrogenase (NAD(P)+) [EC:1.2.1.5];K00129|aldehyde dehydrogenase (NAD(P)+) [EC:1.2.1.5];K00129|aldehyde dehydrogenase (NAD(P)+) [EC:1.2.1.5];K00129|aldehyde dehydrogenase (NAD(P)+) [EC:1.2.1.5];K00129|aldehyde dehydrogenase (NAD(P)+) [EC:1.2.1.5];K00129|aldehyde dehydrogenase (NAD(P)+) [EC:1.2.1.5];K00129|aldehyde dehydrogenase (NAD(P)+) [EC:1.2.1.5];K00129|aldehyde dehydrogenas…	rno00010;rno00340;rno00350;rno00360;rno00410;rno00980;rno00982;rno01100;	Glycolysis / Gluconeogenesis;Histidine metabolism;Tyrosine metabolism;Phenylalanine metabolism;beta-Alanine metabolism;Metabolism of xenobiotics by cytochrome P450;Drug metabolism - cytochrome P450;Metabolic pathways;
AABR07006093.2	0	0	0	0	0	0	0	0	0	ENSRNOG00000060273	120100386	1	201660247	201660328	+	snoRNA	NA	NA	NA	NA	NA	NA
AABR07006111.1	0	0	0	0	0	3	0	0	0	ENSRNOG00000020409	NA	1	202534573	202536183	+	protein_coding	NA	NA	NA	NA	NA	NA
AABR07006120.1	0	0	0	0	0	0	0	0	0	ENSRNOG00000056396	286961	1	204910455	204965538	-	protein_coding	GO:0002238|response to molecule of fungal origin;GO:0008202|steroid metabolic process;GO:0015711|organic anion transport;GO:0035382|sterol transmembrane transport;GO:1901998|toxin transport;	GO:0016324|apical plasma membrane;	GO:0008514|organic anion transmembrane transporter activity;GO:0019534|toxin transmembrane transporter activity;	NA	NA	NA
AABR07006142.1	0	0	0	0	0	0	0	0	0	ENSRNOG00000043478	100909964	2	85011149	85049805	+	protein_coding	NA	NA	NA	NA	NA	NA
AABR07006160.1	15	14	18	23	13	6	14	12	8	ENSRNOG00000017884	690183	1	204990642	204991949	-	protein_coding	GO:0061077|chaperone-mediated protein folding;	NA	GO:0030544|Hsp70 protein binding;GO:0051082|unfolded protein binding;	NA	NA	NA
AABR07006242.1	0	0	0	0	0	0	0	0	0	ENSRNOG00000028909	NA	1	206434271	206438418	-	protein_coding	NA	NA	NA	NA	NA	NA
AABR07006255.1	1	0	0	1	0	0	0	1	1	ENSRNOG00000036633	NA	1	206634613	206635221	+	protein_coding	NA	NA	NA	NA	NA	NA
AABR07006264.1	0	0	1	0	1	1	0	0	0	ENSRNOG00000033714	499319	1	207843432	207872137	-	protein_coding	NA	NA	NA	NA	NA	NA
AABR07006264.2	16	9	14	13	15	16	0	3	5	ENSRNOG00000061597	100912336	1	207808991	207839247	-	protein_coding	NA	GO:0016020|membrane;	NA	NA	NA	NA
AABR07006275.1	0	0	0	0	0	0	0	0	0	ENSRNOG00000042133	690862	1	208218000	208236257	+	protein_coding	NA	NA	NA	NA	NA	NA
AABR07006278.1	0	0	0	2	0	2	0	0	0	ENSRNOG00000020980	NA	1	208368386	208386814	+	protein_coding	NA	NA	NA	NA	NA	NA
AABR07006283.1	0	0	1	0	4	1	0	0	2	ENSRNOG00000020998	NA	1	208516050	208541026	-	protein_coding	NA	NA	NA	NA	NA	NA
AABR07006292.1	0	0	1	0	0	0	1	0	0	ENSRNOG00000058441	120100478	1	208668771	208668889	+	snRNA	NA	NA	NA	NA	NA	NA
AABR07006333.1	5	1	11	1	4	4	4	5	0	ENSRNOG00000050414	NA	18	36198528	36199717	-	protein_coding	NA	NA	NA	NA	NA	NA
AABR07006367.1	0	0	0	0	1	0	0	0	0	ENSRNOG00000005112	NA	16	13110953	13112147	-	protein_coding	NA	NA	NA	NA	NA	NA
AABR07006451.1	0	0	0	0	0	0	0	0	0	ENSRNOG00000029732	108349792	1	216612120	216613127	-	protein_coding	NA	NA	GO:0051287|NAD binding;	NA	NA	NA
AABR07006451.2	0	0	0	0	0	0	0	0	0	ENSRNOG00000053012	120100427	1	216711164	216711298	+	snoRNA	NA	NA	NA	NA	NA	NA
AABR07006474.1	0	0	0	0	0	0	0	0	0	ENSRNOG00000022308	120099997	1	214772800	214773354	+	protein_coding	NA	GO:0016020|membrane;	NA	NA	NA	NA
AABR07006504.1	0	0	0	0	0	0	0	0	0	ENSRNOG00000031086	365426	1	217557253	217557717	+	protein_coding	NA	NA	NA	NA	NA	NA
AABR07006536.3	1	6	1	2	1	2	2	1	0	ENSRNOG00000059083	120100370	1	218910326	218910454	+	snoRNA	NA	NA	NA	NA	NA	NA
AABR07006538.1	1	0	0	0	0	0	0	0	0	ENSRNOG00000051330	100911842	1	219079683	219084806	+	protein_coding	NA	NA	NA	NA	NA	NA
AABR07006540.1	0	0	0	0	0	0	0	0	0	ENSRNOG00000058025	120100414	1	219114576	219114705	-	snoRNA	NA	NA	NA	NA	NA	NA
AABR07006542.2	0	0	0	0	0	0	0	0	0	ENSRNOG00000058035	NA	1	219244661	219252518	-	lncRNA	NA	NA	NA	NA	NA	NA
AABR07006576.1	0	0	0	0	0	0	0	0	0	ENSRNOG00000046395	120100003	1	220577097	220577495	+	protein_coding	GO:0006412|translation;	NA	NA	NA	NA	NA
AABR07006585.1	0	0	0	0	0	0	0	0	0	ENSRNOG00000052937	120100460	1	221233213	221233314	+	snoRNA	NA	NA	NA	NA	NA	NA
AABR07006619.1	0	0	0	0	0	0	0	0	0	ENSRNOG00000050486	NA	1	222557360	222559159	-	protein_coding	NA	NA	NA	NA	NA	NA
AABR07006627.1	6	1	6	4	3	5	1	0	1	ENSRNOG00000030351	108348989	1	79815269	79816511	+	protein_coding	GO:0006281|DNA repair;GO:0006310|DNA recombination;GO:0006914|autophagy;GO:0006935|chemotaxis;GO:0006954|inflammatory response;GO:0031347|regulation of defense response;GO:0045087|innate immune response;	GO:0005576|extracellular region;GO:0005634|nucleus;GO:0005694|chromosome;GO:0005793|endoplasmic reticulum-Golgi intermediate compartment;GO:0005886|plasma membrane;	GO:0003677|DNA binding;	K10802|high mobility group protein B1;K10802|high mobility group protein B1;K10802|high mobility group protein B1;K10802|high mobility group protein B1;	rno03410;rno04140;rno04217;rno04613;	Base excision repair;Autophagy - animal;Necroptosis;Neutrophil extracellular trap formation;
AABR07006627.2	0	1	0	0	6	0	0	0	0	ENSRNOG00000053785	120100363	1	222808283	222808414	-	snoRNA	NA	NA	NA	NA	NA	NA
AABR07006673.1	0	0	0	0	0	0	0	0	0	ENSRNOG00000051537	120100479	1	225488774	225488891	+	snRNA	NA	NA	NA	NA	NA	NA
AABR07006673.2	0	1	0	0	0	0	0	0	0	ENSRNOG00000052832	120100391	1	225495834	225495966	-	snoRNA	NA	NA	NA	NA	NA	NA
AABR07006685.1	0	0	0	0	0	0	0	0	0	ENSRNOG00000059944	NA	1	226522346	226539898	-	lncRNA	NA	NA	NA	NA	NA	NA
AABR07006688.1	0	0	0	0	0	0	0	0	0	ENSRNOG00000030934	NA	1	227799748	227800199	-	protein_coding	NA	NA	NA	NA	NA	NA
AABR07006688.2	0	0	0	0	0	0	0	0	1	ENSRNOG00000031628	NA	1	227796499	227800519	+	protein_coding	NA	NA	NA	NA	NA	NA
AABR07006691.1	0	1	0	0	0	0	0	0	0	ENSRNOG00000011637	NA	1	228016498	228043066	+	protein_coding	NA	NA	NA	NA	NA	NA
AABR07006718.1	0	0	0	0	0	0	0	0	0	ENSRNOG00000056494	120100441	1	228916697	228916830	+	snoRNA	NA	NA	NA	NA	NA	NA
AABR07006724.1	1031	982	1061	1028	1017	1009	237	225	284	ENSRNOG00000053728	54286	1	228408947	229639080	-	protein_coding	GO:0001764|neuron migration;GO:0006468|protein phosphorylation;GO:0007165|signal transduction;GO:0007204|positive regulation of cytosolic calcium ion concentration;GO:0007286|spermatid development;GO:0007420|brain development;GO:0007507|heart development;GO:0010920|negative regulation of inositol phosphate biosynthetic process;GO:0014050|negative regulation of glutamate secretion;GO:0014912|negat…	GO:0001669|acrosomal vesicle;GO:0005654|nucleoplasm;GO:0005737|cytoplasm;GO:0005794|Golgi apparatus;GO:0005829|cytosol;GO:0005886|plasma membrane;GO:0016020|membrane;GO:0042383|sarcolemma;	GO:0004672|protein kinase activity;GO:0004674|protein serine/threonine kinase activity;GO:0004692|cGMP-dependent protein kinase activity;GO:0005246|calcium channel regulator activity;GO:0005524|ATP binding;GO:0030553|cGMP binding;GO:0042802|identical protein binding;GO:0048273|mitogen-activated protein kinase p38 binding;	K07376|cGMP-dependent protein kinase 1 [EC:2.7.11.12];K07376|cGMP-dependent protein kinase 1 [EC:2.7.11.12];K07376|cGMP-dependent protein kinase 1 [EC:2.7.11.12];K07376|cGMP-dependent protein kinase 1 [EC:2.7.11.12];K07376|cGMP-dependent protein kinase 1 [EC:2.7.11.12];K07376|cGMP-dependent protein kinase 1 [EC:2.7.11.12];K07376|cGMP-dependent protein kinase 1 [EC:2.7.11.12];K07376|cGMP-dependent…	rno04022;rno04270;rno04540;rno04611;rno04713;rno04714;rno04730;rno04740;rno04923;rno04970;	cGMP-PKG signaling pathway;Vascular smooth muscle contraction;Gap junction;Platelet activation;Circadian entrainment;Thermogenesis;Long-term depression;Olfactory transduction;Regulation of lipolysis in adipocytes;Salivary secretion;
AABR07006740.1	0	0	0	0	0	0	0	0	0	ENSRNOG00000058869	NA	1	230295276	230295656	+	protein_coding	NA	NA	NA	NA	NA	NA
AABR07006871.1	0	0	0	0	0	0	0	0	1	ENSRNOG00000053536	NA	1	241028717	241029259	+	protein_coding	NA	NA	NA	NA	NA	NA
AABR07007017.1	0	0	0	0	0	0	0	0	0	ENSRNOG00000055351	120100434	1	255305326	255305444	-	snoRNA	NA	NA	NA	NA	NA	NA
AABR07007022.1	0	0	0	0	0	0	0	0	0	ENSRNOG00000060653	120100457	1	255568950	255569042	-	snoRNA	NA	NA	NA	NA	NA	NA
AABR07007032.1	71	64	62	71	61	42	114	96	109	ENSRNOG00000046333	307989	1	256084297	256371969	-	protein_coding	GO:0006366|transcription by RNA polymerase II;GO:0007010|cytoskeleton organization;GO:0007411|axon guidance;GO:0008150|biological_process;GO:0030032|lamellipodium assembly;GO:0045944|positive regulation of transcription by RNA polymerase II;GO:0060271|cilium assembly;	GO:0001725|stress fiber;GO:0005575|cellular_component;GO:0005737|cytoplasm;GO:0014069|postsynaptic density;GO:0015629|actin cytoskeleton;GO:0030027|lamellipodium;	GO:0003779|actin binding;GO:0005515|protein binding;GO:0046872|metal ion binding;	K07520|actin-binding LIM protein;	rno04360;	Axon guidance;
AABR07007068.1	93	123	130	98	107	115	44	25	33	ENSRNOG00000017438	25454	1	257321742	257551473	-	protein_coding	GO:0001822|kidney development;GO:0007166|cell surface receptor signaling pathway;GO:0007399|nervous system development;GO:0007568|aging;GO:0008584|male gonad development;GO:0016477|cell migration;GO:0030182|neuron differentiation;GO:0031175|neuron projection development;GO:0038179|neurotrophin signaling pathway;GO:0050731|positive regulation of peptidyl-tyrosine phosphorylation;	GO:0005615|extracellular space;GO:0005771|multivesicular body;GO:0005794|Golgi apparatus;GO:0005886|plasma membrane;GO:0009897|external side of plasma membrane;GO:0030424|axon;GO:0043025|neuronal cell body;GO:0043235|receptor complex;GO:0098797|plasma membrane protein complex;	GO:0005030|neurotrophin receptor activity;GO:0005178|integrin binding;GO:0005515|protein binding;GO:0038023|signaling receptor activity;	NA	NA	NA
AABR07007088.1	0	0	0	0	0	0	0	0	0	ENSRNOG00000052677	NA	1	258336046	258339474	-	lncRNA	NA	NA	NA	NA	NA	NA
AABR07007121.1	23	15	18	19	23	18	33	34	38	ENSRNOG00000033843	NA	1	259826698	259827548	+	protein_coding	NA	NA	NA	NA	NA	NA
AABR07007124.2	0	0	1	0	0	0	0	0	1	ENSRNOG00000061657	120093054	1	259917206	259917337	-	snoRNA	NA	NA	NA	NA	NA	NA
AABR07007134.1	0	0	0	0	0	0	0	0	0	ENSRNOG00000051496	292151	1	260311343	260311843	+	protein_coding	NA	GO:0005960|glycine cleavage complex;	NA	NA	NA	NA
AABR07007146.1	0	0	0	0	0	0	0	0	1	ENSRNOG00000048823	688542	19	28520	37732	-	protein_coding	NA	NA	GO:0016787|hydrolase activity;	K03927|carboxylesterase 2 [EC:3.1.1.1 3.1.1.84 3.1.1.56];	rno00983;	Drug metabolism - other enzymes;
AABR07007399.1	0	0	0	0	0	0	0	0	0	ENSRNOG00000049010	NA	2	14393861	14394394	-	protein_coding	NA	NA	NA	NA	NA	NA
AABR07007642.1	2	1	0	1	2	2	14	5	3	ENSRNOG00000056151	114513	2	23117004	23361240	-	protein_coding	GO:0007264|small GTPase mediated signal transduction;GO:0007265|Ras protein signal transduction;GO:0008150|biological_process;GO:0034976|response to endoplasmic reticulum stress;GO:0043547|positive regulation of GTPase activity;GO:0060291|long-term synaptic potentiation;GO:0065008|regulation of biological quality;GO:2000310|regulation of NMDA receptor activity;	GO:0005575|cellular_component;GO:0005783|endoplasmic reticulum;GO:0005789|endoplasmic reticulum membrane;GO:0005886|plasma membrane;	GO:0005085|guanyl-nucleotide exchange factor activity;GO:0005515|protein binding;GO:0005516|calmodulin binding;	K12326|Ras-specific guanine nucleotide-releasing factor 2;K12326|Ras-specific guanine nucleotide-releasing factor 2;	rno04010;rno04014;	MAPK signaling pathway;Ras signaling pathway;
AABR07007675.1	6	10	15	10	19	9	12	8	16	ENSRNOG00000029988	103691423	2	24883904	24884218	-	protein_coding	NA	NA	NA	NA	NA	NA
AABR07007675.2	0	0	0	0	0	0	0	0	0	ENSRNOG00000058886	NA	2	24881206	24881606	+	protein_coding	NA	NA	NA	NA	NA	NA
AABR07007676.1	0	0	0	0	0	0	0	0	0	ENSRNOG00000055813	120101241	2	25098331	25098459	+	snoRNA	NA	NA	NA	NA	NA	NA
AABR07007710.1	0	0	0	0	0	0	0	0	0	ENSRNOG00000054864	120101365	2	26684960	26685025	-	snoRNA	NA	NA	NA	NA	NA	NA
AABR07007723.1	0	0	0	0	0	0	0	0	0	ENSRNOG00000061565	120101361	2	29273209	29273341	+	snoRNA	NA	NA	NA	NA	NA	NA
AABR07007730.1	1	0	1	0	1	0	0	2	1	ENSRNOG00000018045	499512	2	26836416	26836838	+	protein_coding	GO:0015986|proton motive force-driven ATP synthesis;GO:1902600|proton transmembrane transport;	GO:0031966|mitochondrial membrane;GO:0045263|proton-transporting ATP synthase complex, coupling factor F(o);	GO:0008289|lipid binding;GO:0015078|proton transmembrane transporter activity;	NA	NA	NA
AABR07007744.2	0	0	0	0	0	0	0	0	0	ENSRNOG00000060714	NA	2	27601232	27601825	-	protein_coding	NA	NA	NA	NA	NA	NA
AABR07007769.1	0	0	0	1	0	1	0	0	1	ENSRNOG00000025321	100359720	2	28092882	28241719	+	protein_coding	GO:0007129|homologous chromosome pairing at meiosis;GO:0010780|meiotic DNA double-strand break formation involved in reciprocal meiotic recombination;GO:1903343|positive regulation of meiotic DNA double-strand break formation;	GO:0000785|chromatin;	NA	NA	NA	NA
AABR07007837.1	0	0	0	0	0	0	0	0	0	ENSRNOG00000054044	120101347	2	31064471	31064584	-	snoRNA	NA	NA	NA	NA	NA	NA
AABR07007883.1	0	0	0	0	0	0	0	0	0	ENSRNOG00000060780	120101238	2	34022197	34022326	-	snoRNA	NA	NA	NA	NA	NA	NA
AABR07007905.2	0	0	0	0	1	0	0	0	1	ENSRNOG00000053229	NA	13	72626979	72632062	+	protein_coding	NA	NA	NA	NA	NA	NA
AABR07007942.1	0	1	0	0	0	0	0	0	0	ENSRNOG00000058150	120101342	2	36440245	36440364	-	snoRNA	NA	NA	NA	NA	NA	NA
AABR07008066.2	116	69	127	121	115	126	37	36	51	ENSRNOG00000047236	NA	2	41527707	41527895	+	protein_coding	NA	NA	NA	NA	NA	NA
AABR07008181.1	0	0	0	0	0	0	0	0	0	ENSRNOG00000060124	120101248	2	46616848	46616952	-	snoRNA	NA	NA	NA	NA	NA	NA
AABR07008272.1	0	0	0	0	0	0	0	0	0	ENSRNOG00000053499	120101349	2	49973427	49973549	+	snoRNA	NA	NA	NA	NA	NA	NA
AABR07008293.1	0	0	0	0	0	0	0	0	0	ENSRNOG00000022407	365682	2	51392298	51393071	-	protein_coding	GO:0006826|iron ion transport;	NA	NA	NA	NA	NA
AABR07008309.1	0	0	0	0	0	0	0	0	0	ENSRNOG00000052649	NA	2	52006086	52027865	+	lncRNA	NA	NA	NA	NA	NA	NA
AABR07008319.1	0	0	0	0	0	0	0	2	0	ENSRNOG00000056627	NA	2	51792434	51793483	-	protein_coding	NA	NA	NA	NA	NA	NA
AABR07008337.1	0	0	0	0	0	0	0	0	0	ENSRNOG00000057098	120101369	2	52823012	52823132	-	snRNA	NA	NA	NA	NA	NA	NA
AABR07008361.1	0	0	0	0	0	0	0	0	0	ENSRNOG00000055772	120101290	2	53778599	53778725	+	snoRNA	NA	NA	NA	NA	NA	NA
AABR07008372.1	0	0	0	0	0	0	0	0	0	ENSRNOG00000060403	120101296	2	54076193	54076322	+	snoRNA	NA	NA	NA	NA	NA	NA
AABR07008390.1	0	0	0	0	0	0	0	0	0	ENSRNOG00000056120	120101337	2	55289605	55289731	-	snoRNA	NA	NA	NA	NA	NA	NA
AABR07008421.1	0	0	0	0	1	0	0	0	0	ENSRNOG00000030748	100362827	2	57618690	57618953	-	protein_coding	NA	GO:0000785|chromatin;GO:0005634|nucleus;	GO:0031492|nucleosomal DNA binding;	NA	NA	NA
AABR07008608.1	0	0	0	0	1	1	0	0	0	ENSRNOG00000055439	NA	2	65893758	65896044	-	protein_coding	NA	NA	NA	NA	NA	NA
AABR07008681.1	44	31	66	54	50	50	16	4	13	ENSRNOG00000053969	NA	2	60024969	60032699	-	protein_coding	NA	NA	NA	NA	NA	NA
AABR07008724.1	0	0	0	0	0	0	0	0	0	ENSRNOG00000019037	NA	2	70904506	70905278	+	protein_coding	NA	NA	NA	NA	NA	NA
AABR07008724.2	0	0	0	0	0	0	0	0	0	ENSRNOG00000053777	120101346	2	70942410	70942533	+	snoRNA	NA	NA	NA	NA	NA	NA
AABR07008876.1	0	0	0	0	0	0	0	0	0	ENSRNOG00000053292	NA	2	85809429	85855354	+	protein_coding	NA	NA	NA	NA	NA	NA
AABR07008904.1	32	19	24	23	22	20	27	17	32	ENSRNOG00000025157	310177	2	76016684	76017358	-	protein_coding	NA	NA	NA	NA	NA	NA
AABR07008911.1	9	4	5	2	7	1	4	1	2	ENSRNOG00000056969	NA	2	76500033	76500935	-	protein_coding	NA	NA	NA	NA	NA	NA
AABR07008940.1	0	0	0	0	0	0	0	0	0	ENSRNOG00000011997	NA	2	78292894	78297025	+	protein_coding	NA	NA	NA	NA	NA	NA
AABR07009034.1	4	0	0	0	1	3	0	0	7	ENSRNOG00000061349	120101243	2	82490770	82490892	+	snoRNA	NA	NA	NA	NA	NA	NA
AABR07009039.1	0	0	0	0	0	0	0	0	0	ENSRNOG00000059078	120101303	2	82790417	82790548	-	snoRNA	NA	NA	NA	NA	NA	NA
AABR07009105.1	42	34	30	27	24	29	61	75	35	ENSRNOG00000053325	NA	2	84562574	84591269	+	protein_coding	NA	NA	NA	NA	NA	NA
AABR07009106.1	141	150	128	146	117	141	145	149	146	ENSRNOG00000051606	100360380	2	84608705	84684942	+	protein_coding	GO:0006355|regulation of DNA-templated transcription;GO:0045944|positive regulation of transcription by RNA polymerase II;	NA	GO:0046872|metal ion binding;	NA	NA	NA
AABR07009247.1	0	0	0	0	0	0	0	0	0	ENSRNOG00000051687	NA	2	88812449	88841541	-	protein_coding	NA	NA	NA	NA	NA	NA
AABR07009260.1	0	0	0	0	0	0	0	0	0	ENSRNOG00000030039	100910852	2	88860950	88947673	-	protein_coding	GO:0007165|signal transduction;	GO:0016020|membrane;	NA	NA	NA	NA
AABR07009379.1	0	0	0	0	0	0	0	0	0	ENSRNOG00000052763	120101256	2	92916705	92916823	+	snoRNA	NA	NA	NA	NA	NA	NA
AABR07009384.1	1	0	1	2	0	0	0	0	0	ENSRNOG00000054541	120101326	2	93083352	93083478	+	snoRNA	NA	NA	NA	NA	NA	NA
AABR07009402.1	0	0	0	0	0	0	0	0	0	ENSRNOG00000059609	120101358	2	94326020	94326096	+	snoRNA	NA	NA	NA	NA	NA	NA
AABR07009419.1	0	0	0	0	0	0	0	0	0	ENSRNOG00000059636	120101252	2	94907305	94907427	-	snoRNA	NA	NA	NA	NA	NA	NA
AABR07009482.1	0	0	0	0	0	0	0	0	0	ENSRNOG00000056549	120101339	2	97739683	97739817	-	snoRNA	NA	NA	NA	NA	NA	NA
AABR07009508.1	0	0	0	0	0	0	0	0	0	ENSRNOG00000021867	NA	2	98793534	98793791	+	processed_pseudogene	NA	NA	NA	NA	NA	NA
AABR07009521.1	0	0	0	0	0	0	0	0	0	ENSRNOG00000058851	120101332	2	99201277	99201403	+	snoRNA	NA	NA	NA	NA	NA	NA
AABR07009533.1	0	0	0	0	0	0	0	0	0	ENSRNOG00000058175	120101249	2	99826700	99826807	-	snoRNA	NA	NA	NA	NA	NA	NA
AABR07009542.1	0	0	0	0	0	0	0	0	0	ENSRNOG00000061894	120099508	X	98426361	98426479	-	snoRNA	NA	NA	NA	NA	NA	NA
AABR07009572.1	7	11	3	4	3	4	2	4	6	ENSRNOG00000013038	NA	2	101842122	101843690	+	protein_coding	NA	NA	NA	NA	NA	NA
AABR07009634.1	0	0	0	0	0	0	0	0	0	ENSRNOG00000052367	NA	2	103939126	103944795	-	lncRNA	NA	NA	NA	NA	NA	NA
AABR07009634.2	0	0	0	0	0	0	0	0	0	ENSRNOG00000052903	NA	2	103943845	104031632	+	lncRNA	NA	NA	NA	NA	NA	NA
AABR07009669.1	0	0	0	0	0	0	0	0	0	ENSRNOG00000058502	120101351	2	105199664	105199775	-	snoRNA	NA	NA	NA	NA	NA	NA
AABR07009715.1	74	67	78	59	55	84	48	50	75	ENSRNOG00000031378	120100784	2	104591786	104592794	+	protein_coding	GO:0007276|gamete generation;	GO:0005634|nucleus;	NA	NA	NA	NA
AABR07009800.1	0	0	1	0	0	0	0	1	0	ENSRNOG00000051871	120101329	2	109994487	109994611	+	snoRNA	NA	NA	NA	NA	NA	NA
AABR07009910.1	0	0	0	0	0	0	0	0	0	ENSRNOG00000056416	120101297	2	112863681	112863811	+	snoRNA	NA	NA	NA	NA	NA	NA
AABR07009964.1	0	0	0	1	0	0	0	0	0	ENSRNOG00000055857	120101259	2	115082698	115082841	-	snoRNA	NA	NA	NA	NA	NA	NA
AABR07009978.1	8	2	11	7	3	5	3	1	1	ENSRNOG00000038552	NA	2	115519225	115519669	-	pseudogene	NA	NA	NA	NA	NA	NA
AABR07010085.2	0	0	0	0	0	0	0	0	0	ENSRNOG00000056177	686106	2	118862776	118924543	-	protein_coding	NA	NA	NA	NA	NA	NA
AABR07010118.1	0	0	0	0	0	0	0	0	0	ENSRNOG00000056100	120101292	2	120737785	120737921	-	snoRNA	NA	NA	NA	NA	NA	NA
AABR07010150.1	0	0	0	0	0	0	0	0	0	ENSRNOG00000059800	120101334	2	122823020	122823149	-	snoRNA	NA	NA	NA	NA	NA	NA
AABR07010302.1	0	0	0	0	0	0	0	0	0	ENSRNOG00000055905	120101335	2	130664190	130664323	+	snoRNA	NA	NA	NA	NA	NA	NA
AABR07010333.1	0	0	0	0	0	0	0	0	0	ENSRNOG00000031248	NA	2	148893044	148903882	+	protein_coding	NA	NA	NA	NA	NA	NA
AABR07010370.1	0	0	0	0	0	0	0	0	0	ENSRNOG00000054361	NA	2	48580173	48582334	-	pseudogene	NA	NA	NA	NA	NA	NA
AABR07010460.1	0	0	0	0	0	0	0	0	0	ENSRNOG00000061443	NA	2	128449318	128450370	+	protein_coding	NA	NA	NA	NA	NA	NA
AABR07010524.1	0	0	0	0	0	0	0	0	0	ENSRNOG00000029493	103691563	2	132272250	132272627	-	protein_coding	NA	NA	NA	NA	NA	NA
AABR07010550.1	0	0	0	0	0	0	0	0	0	ENSRNOG00000054369	120101306	2	134854326	134854445	-	snoRNA	NA	NA	NA	NA	NA	NA
AABR07010601.1	0	0	0	0	0	0	0	0	0	ENSRNOG00000055556	120101356	2	137598603	137598719	+	snoRNA	NA	NA	NA	NA	NA	NA
AABR07010649.2	0	0	0	0	0	0	0	0	0	ENSRNOG00000059307	120101343	2	140617246	140617361	-	snoRNA	NA	NA	NA	NA	NA	NA
AABR07010672.1	0	0	0	1	0	0	0	0	0	ENSRNOG00000054545	NA	X	137614	142215	-	protein_coding	NA	NA	NA	NA	NA	NA
AABR07010705.1	75	81	99	86	83	73	50	47	66	ENSRNOG00000032715	NA	2	142289467	142290623	+	protein_coding	NA	NA	NA	NA	NA	NA
AABR07010787.1	2	3	3	5	5	0	3	0	1	ENSRNOG00000053939	NA	2	145598401	145599331	-	protein_coding	NA	NA	NA	NA	NA	NA
AABR07010862.1	0	0	0	0	0	0	0	0	0	ENSRNOG00000053220	120101244	2	147675590	147675715	-	snoRNA	NA	NA	NA	NA	NA	NA
AABR07010899.1	2	0	0	0	2	1	0	0	0	ENSRNOG00000028373	689629	2	131697547	131733777	+	protein_coding	NA	NA	NA	NA	NA	NA
AABR07010907.1	1	0	0	0	0	0	0	0	0	ENSRNOG00000042535	499607	2	131750100	131797459	+	protein_coding	GO:0007165|signal transduction;	NA	NA	NA	NA	NA
AABR07010940.1	0	0	0	0	0	0	0	0	0	ENSRNOG00000054583	120101291	2	149087742	149087872	-	snoRNA	NA	NA	NA	NA	NA	NA
AABR07010940.2	0	0	0	0	0	0	0	0	0	ENSRNOG00000057368	120101314	2	149074535	149074665	-	snoRNA	NA	NA	NA	NA	NA	NA
AABR07011057.1	0	0	0	0	0	0	0	0	0	ENSRNOG00000000889	304239	12	4201359	4238722	-	protein_coding	GO:0007264|small GTPase mediated signal transduction;	NA	GO:0005096|GTPase activator activity;GO:0031267|small GTPase binding;	NA	NA	NA
AABR07011672.1	1	2	2	0	0	0	0	1	0	ENSRNOG00000028561	NA	2	153125383	153125956	-	pseudogene	NA	NA	NA	NA	NA	NA
AABR07011697.1	3	2	2	2	0	1	1	2	5	ENSRNOG00000054429	NA	2	153928555	153930309	-	processed_pseudogene	NA	NA	NA	NA	NA	NA
AABR07011698.1	12	4	10	12	10	9	2	4	5	ENSRNOG00000028120	NA	2	153941154	153942719	-	protein_coding	NA	NA	NA	NA	NA	NA
AABR07011705.1	0	0	0	0	0	0	0	0	0	ENSRNOG00000053892	120101308	2	154248107	154248230	-	snoRNA	NA	NA	NA	NA	NA	NA
AABR07011708.2	0	0	0	0	0	0	0	0	0	ENSRNOG00000054350	120101287	2	154290338	154290468	-	snoRNA	NA	NA	NA	NA	NA	NA
AABR07011712.1	0	0	0	0	0	0	0	0	0	ENSRNOG00000059221	120101295	2	154532746	154532876	-	snoRNA	NA	NA	NA	NA	NA	NA
AABR07011733.1	0	0	0	0	0	0	1	0	0	ENSRNOG00000061317	NA	2	86949188	86950375	+	protein_coding	NA	NA	NA	NA	NA	NA
AABR07011744.1	0	0	0	0	0	0	0	0	0	ENSRNOG00000061747	NA	2	155257711	155271522	-	protein_coding	NA	NA	NA	NA	NA	NA
AABR07011808.1	0	0	0	0	0	0	0	0	0	ENSRNOG00000058131	120101359	2	157960235	157960347	+	snoRNA	NA	NA	NA	NA	NA	NA
AABR07011861.1	0	0	0	0	0	0	0	0	0	ENSRNOG00000059573	120101354	2	159592251	159592348	+	snoRNA	NA	NA	NA	NA	NA	NA
AABR07011912.1	0	0	0	0	0	0	0	0	0	ENSRNOG00000058807	120101353	2	162010023	162010134	-	snoRNA	NA	NA	NA	NA	NA	NA
AABR07011951.1	64	39	64	53	53	48	51	53	76	ENSRNOG00000034093	494559	2	164044261	164046336	+	protein_coding	GO:0072318|clathrin coat disassembly;	NA	GO:0140662|ATP-dependent protein folding chaperone;	NA	NA	NA
AABR07011954.1	0	0	0	0	0	0	0	0	0	ENSRNOG00000060028	120101336	2	164121936	164122053	+	snoRNA	NA	NA	NA	NA	NA	NA
AABR07011997.2	0	0	0	0	0	0	0	0	0	ENSRNOG00000061427	120101232	2	167273798	167273878	+	snoRNA	NA	NA	NA	NA	NA	NA
AABR07012054.1	48	41	58	40	47	64	51	37	39	ENSRNOG00000049530	NA	2	170310458	170311268	-	protein_coding	NA	NA	NA	NA	NA	NA
AABR07012111.1	0	0	0	0	0	0	0	0	0	ENSRNOG00000057752	120101357	2	171676727	171676830	-	snoRNA	NA	NA	NA	NA	NA	NA
AABR07012128.1	0	0	0	0	0	0	0	0	0	ENSRNOG00000052892	120101284	2	172683386	172683519	-	snoRNA	NA	NA	NA	NA	NA	NA
AABR07012129.1	1	0	0	2	0	2	0	0	0	ENSRNOG00000016146	NA	2	172728560	172730748	+	protein_coding	NA	NA	NA	NA	NA	NA
AABR07012133.1	0	1	0	1	0	0	0	0	0	ENSRNOG00000047188	NA	2	173025096	173025485	-	processed_pseudogene	NA	NA	NA	NA	NA	NA
AABR07012310.1	0	0	0	0	0	0	0	0	0	ENSRNOG00000033499	120100586	2	178232733	178233155	-	protein_coding	GO:0031424|keratinization;	NA	NA	NA	NA	NA
AABR07012317.1	0	0	0	0	0	0	0	0	0	ENSRNOG00000046788	103691629	2	178344834	178345193	-	protein_coding	GO:0031424|keratinization;	NA	NA	NA	NA	NA
AABR07012329.1	0	0	0	0	0	0	0	0	0	ENSRNOG00000009602	NA	2	178890048	178890824	+	pseudogene	NA	NA	NA	NA	NA	NA
AABR07012426.1	0	0	0	0	0	0	0	0	0	ENSRNOG00000050263	NA	2	180190557	180217844	-	protein_coding	NA	NA	NA	NA	NA	NA
AABR07012587.1	0	0	0	0	0	0	0	0	0	ENSRNOG00000002223	NA	2	184004618	184004868	-	protein_coding	NA	NA	NA	NA	NA	NA
AABR07012588.1	0	0	0	0	0	0	0	0	0	ENSRNOG00000059842	NA	2	184019212	184019587	+	protein_coding	NA	NA	NA	NA	NA	NA
AABR07012592.1	0	0	0	0	0	0	0	0	0	ENSRNOG00000037223	NA	2	184092422	184092619	-	protein_coding	NA	NA	NA	NA	NA	NA
AABR07012594.1	0	0	3	2	1	0	6	2	1	ENSRNOG00000058027	120101237	2	184258930	184259065	-	snoRNA	NA	NA	NA	NA	NA	NA
AABR07012635.1	0	0	0	0	0	0	0	0	0	ENSRNOG00000053190	NA	2	186188624	186202949	+	protein_coding	NA	NA	NA	NA	NA	NA
AABR07012640.2	0	0	0	0	0	0	0	0	0	ENSRNOG00000058255	120101313	2	186442544	186442670	-	snoRNA	NA	NA	NA	NA	NA	NA
AABR07012705.1	0	0	3	1	0	2	0	0	3	ENSRNOG00000061190	120101319	2	187954263	187954389	-	snoRNA	NA	NA	NA	NA	NA	NA
AABR07012754.1	0	0	0	0	0	0	0	0	0	ENSRNOG00000061123	120101328	2	190921004	190921108	+	snoRNA	NA	NA	NA	NA	NA	NA
AABR07012762.1	0	0	0	0	0	0	0	0	0	ENSRNOG00000051873	120101331	2	191704272	191704412	+	snoRNA	NA	NA	NA	NA	NA	NA
AABR07012763.1	0	0	0	0	0	0	0	0	0	ENSRNOG00000057707	NA	2	191847173	191861641	-	protein_coding	NA	NA	NA	NA	NA	NA
AABR07012788.1	0	0	0	0	0	0	0	0	0	ENSRNOG00000051068	NA	2	193495684	193498211	-	protein_coding	NA	NA	NA	NA	NA	NA
AABR07012795.1	479	398	424	413	371	451	895	870	1053	ENSRNOG00000017695	100363379	2	193602121	193603084	+	protein_coding	NA	NA	GO:0140824|thioredoxin-dependent peroxiredoxin activity;	NA	NA	NA
AABR07012868.1	0	0	0	0	0	0	0	0	0	ENSRNOG00000030847	NA	2	197203939	197204322	+	pseudogene	NA	NA	NA	NA	NA	NA
AABR07012926.1	0	0	0	0	0	0	0	0	0	ENSRNOG00000052881	120101345	2	200122587	200122699	-	snoRNA	NA	NA	NA	NA	NA	NA
AABR07012991.1	2	4	4	2	5	3	0	2	1	ENSRNOG00000059407	120101255	2	202424997	202425127	+	snoRNA	NA	NA	NA	NA	NA	NA
AABR07012994.1	0	0	0	0	0	0	0	0	0	ENSRNOG00000061534	120101352	2	202658109	202658229	-	snoRNA	NA	NA	NA	NA	NA	NA
AABR07013007.1	0	0	0	0	2	0	0	0	0	ENSRNOG00000058770	120101298	2	203244376	203244507	+	snoRNA	NA	NA	NA	NA	NA	NA
AABR07013057.1	3	2	0	1	1	1	0	0	0	ENSRNOG00000060159	NA	2	205055979	205072866	-	protein_coding	NA	NA	NA	NA	NA	NA
AABR07013065.1	0	0	0	0	0	0	0	0	0	ENSRNOG00000055846	NA	2	205221989	205250249	-	protein_coding	NA	NA	NA	NA	NA	NA
AABR07013086.1	0	0	0	0	0	0	0	1	0	ENSRNOG00000023365	NA	2	207573774	207574738	+	protein_coding	NA	NA	NA	NA	NA	NA
AABR07013135.1	0	0	0	0	0	0	0	0	0	ENSRNOG00000051673	120101323	2	208691757	208691893	-	snoRNA	NA	NA	NA	NA	NA	NA
AABR07013165.1	0	0	0	0	1	1	2	0	0	ENSRNOG00000060844	NA	2	210319911	210347097	-	lncRNA	NA	NA	NA	NA	NA	NA
AABR07013200.1	0	0	0	0	0	0	0	0	0	ENSRNOG00000030491	303448	10	75962608	75963615	-	protein_coding	GO:0006006|glucose metabolic process;GO:0006096|glycolytic process;	GO:0005829|cytosol;	GO:0004365|glyceraldehyde-3-phosphate dehydrogenase (NAD+) (phosphorylating) activity;GO:0050661|NADP binding;GO:0051287|NAD binding;	K00134|glyceraldehyde 3-phosphate dehydrogenase (phosphorylating) [EC:1.2.1.12];K00134|glyceraldehyde 3-phosphate dehydrogenase (phosphorylating) [EC:1.2.1.12];K00134|glyceraldehyde 3-phosphate dehydrogenase (phosphorylating) [EC:1.2.1.12];K00134|glyceraldehyde 3-phosphate dehydrogenase (phosphorylating) [EC:1.2.1.12];K00134|glyceraldehyde 3-phosphate dehydrogenase (phosphorylating) [EC:1.2.1.12]…	rno00010;rno01100;rno01200;rno01230;rno04066;rno05010;rno05132;rno05415;	Glycolysis / Gluconeogenesis;Metabolic pathways;Carbon metabolism;Biosynthesis of amino acids;HIF-1 signaling pathway;Alzheimer disease;Salmonella infection;Diabetic cardiomyopathy;
AABR07013207.1	0	0	0	0	0	0	0	0	0	ENSRNOG00000057704	120101368	2	211550817	211550946	-	snRNA	NA	NA	NA	NA	NA	NA
AABR07013208.1	45	43	67	38	55	38	13	12	25	ENSRNOG00000053898	120101240	2	211685412	211685541	-	snoRNA	NA	NA	NA	NA	NA	NA
AABR07013217.1	0	0	0	0	0	0	0	0	0	ENSRNOG00000060127	120101312	2	212735448	212735598	+	snoRNA	NA	NA	NA	NA	NA	NA
AABR07013412.1	0	0	0	0	0	0	0	0	0	ENSRNOG00000055035	NA	2	219584891	219585235	-	protein_coding	NA	NA	NA	NA	NA	NA
AABR07013425.1	0	0	0	0	0	0	0	0	0	ENSRNOG00000050075	NA	2	197901214	197902287	-	protein_coding	NA	NA	NA	NA	NA	NA
AABR07013446.1	0	0	0	0	0	0	0	0	0	ENSRNOG00000058729	120101311	2	221294661	221294790	-	snoRNA	NA	NA	NA	NA	NA	NA
AABR07013591.1	0	0	0	0	0	0	0	0	0	ENSRNOG00000060967	120101108	2	228566040	228566192	-	snRNA	NA	NA	NA	NA	NA	NA
AABR07013654.1	0	0	0	0	0	0	0	0	0	ENSRNOG00000061151	NA	2	10767745	10769312	+	pseudogene	NA	NA	NA	NA	NA	NA
AABR07013762.1	0	0	0	0	0	0	0	0	0	ENSRNOG00000055668	120101360	2	238885848	238885934	-	snoRNA	NA	NA	NA	NA	NA	NA
AABR07013776.1	0	0	0	0	0	0	0	0	0	ENSRNOG00000048082	NA	2	239898492	239898935	-	protein_coding	NA	NA	NA	NA	NA	NA
AABR07013856.1	0	0	0	0	0	0	0	0	0	ENSRNOG00000058700	120101318	2	242630407	242630539	+	snoRNA	NA	NA	NA	NA	NA	NA
AABR07013859.1	0	0	0	0	0	0	0	0	0	ENSRNOG00000053556	120101305	2	242762713	242762840	+	snoRNA	NA	NA	NA	NA	NA	NA
AABR07013860.3	0	0	0	0	0	0	0	0	0	ENSRNOG00000056880	120101239	2	242878456	242878586	+	snoRNA	NA	NA	NA	NA	NA	NA
AABR07013860.4	1	1	2	4	2	0	2	0	3	ENSRNOG00000060388	120101235	2	242848622	242848692	-	snoRNA	NA	NA	NA	NA	NA	NA
AABR07013931.1	0	0	0	0	0	0	0	0	0	ENSRNOG00000051869	NA	2	246862972	246863133	-	processed_pseudogene	NA	NA	NA	NA	NA	NA
AABR07013931.2	0	0	0	0	0	0	0	0	0	ENSRNOG00000053997	NA	2	246889564	246889770	+	protein_coding	NA	NA	NA	NA	NA	NA
AABR07014125.1	0	0	0	0	0	0	0	0	0	ENSRNOG00000054857	100910108	14	22243	54217	+	protein_coding	GO:0006508|proteolysis;	NA	GO:0004252|serine-type endopeptidase activity;	NA	NA	NA
AABR07014177.1	4	1	0	0	1	0	0	0	0	ENSRNOG00000039989	NA	14	43707383	43707970	-	pseudogene	NA	NA	NA	NA	NA	NA
AABR07014298.1	0	0	0	0	0	0	0	0	0	ENSRNOG00000034289	501886	14	6365869	6366261	+	protein_coding	GO:0008150|biological_process;	GO:0005575|cellular_component;	GO:0003674|molecular_function;	NA	NA	NA
AABR07014301.2	0	0	0	0	0	0	0	0	0	ENSRNOG00000050982	120096563	14	6567733	6568056	-	protein_coding	GO:0033617|mitochondrial cytochrome c oxidase assembly;	GO:0005743|mitochondrial inner membrane;	NA	NA	NA	NA
AABR07014306.1	0	0	0	0	0	0	0	0	0	ENSRNOG00000051571	NA	14	7344296	7355870	+	lncRNA	NA	NA	NA	NA	NA	NA
AABR07014306.2	0	0	0	0	0	0	0	0	0	ENSRNOG00000057919	NA	14	7335091	7344240	-	lncRNA	NA	NA	NA	NA	NA	NA
AABR07014487.1	0	0	0	0	0	0	0	0	0	ENSRNOG00000039548	NA	14	16305362	16306013	-	pseudogene	NA	NA	NA	NA	NA	NA
AABR07014536.1	0	0	0	0	0	0	0	0	0	ENSRNOG00000059646	120096809	14	18399610	18399737	-	snoRNA	NA	NA	NA	NA	NA	NA
AABR07014550.1	0	2	0	0	0	3	2	0	4	ENSRNOG00000003606	498340	14	19525558	19526016	+	protein_coding	NA	GO:0016020|membrane;	NA	NA	NA	NA
AABR07014552.1	0	0	0	0	0	0	0	0	0	ENSRNOG00000051736	120096832	14	19630292	19630423	-	snoRNA	NA	NA	NA	NA	NA	NA
AABR07014573.2	0	0	0	0	0	0	0	0	0	ENSRNOG00000023430	NA	14	20097194	20111700	-	protein_coding	NA	NA	NA	NA	NA	NA
AABR07014676.1	0	0	0	0	0	0	0	0	2	ENSRNOG00000033207	NA	14	23647609	23648702	-	protein_coding	NA	NA	NA	NA	NA	NA
AABR07014688.1	0	0	0	0	0	0	0	0	0	ENSRNOG00000061566	120096819	14	24377446	24377574	+	snoRNA	NA	NA	NA	NA	NA	NA
AABR07014758.1	0	0	0	0	0	0	0	0	0	ENSRNOG00000055559	120096787	14	28313802	28313928	-	snoRNA	NA	NA	NA	NA	NA	NA
AABR07014760.1	0	0	0	0	0	0	0	0	0	ENSRNOG00000059213	120096781	14	28365625	28365700	+	snoRNA	NA	NA	NA	NA	NA	NA
AABR07014778.1	0	0	0	0	0	0	0	0	0	ENSRNOG00000057962	120096810	14	29427575	29427704	-	snoRNA	NA	NA	NA	NA	NA	NA
AABR07014804.1	92	69	74	85	75	57	49	57	76	ENSRNOG00000024829	305284	14	30005174	30006050	+	protein_coding	NA	NA	NA	NA	NA	NA
AABR07014822.1	0	0	0	0	0	0	0	0	0	ENSRNOG00000060186	120096812	14	30475917	30476044	+	snoRNA	NA	NA	NA	NA	NA	NA
AABR07014962.1	0	0	0	0	0	0	0	0	0	ENSRNOG00000052658	120096811	14	39610715	39610842	+	snoRNA	NA	NA	NA	NA	NA	NA
AABR07014996.1	0	0	2	3	1	0	1	1	1	ENSRNOG00000032160	680579	14	42594039	42594665	-	protein_coding	GO:0006412|translation;	NA	NA	NA	NA	NA
AABR07015005.1	0	0	0	0	0	0	0	0	0	ENSRNOG00000061477	120096833	14	42991892	42992020	-	snoRNA	NA	NA	NA	NA	NA	NA
AABR07015007.1	0	0	0	0	0	0	0	0	0	ENSRNOG00000054706	NA	14	43206507	43214530	-	lncRNA	NA	NA	NA	NA	NA	NA
AABR07015180.1	2	3	3	3	1	1	7	4	5	ENSRNOG00000026134	NA	14	45878685	45880763	-	protein_coding	NA	NA	NA	NA	NA	NA
AABR07015294.1	24	29	24	22	22	12	26	40	49	ENSRNOG00000022882	NA	X	149319178	149320639	-	protein_coding	NA	NA	NA	NA	NA	NA
AABR07015338.1	0	0	0	0	0	0	0	0	0	ENSRNOG00000055710	120096826	14	49405369	49405490	+	snoRNA	NA	NA	NA	NA	NA	NA
AABR07015346.1	12	9	23	10	16	22	22	13	23	ENSRNOG00000027791	688386	14	51301168	51301633	+	protein_coding	GO:0006123|mitochondrial electron transport, cytochrome c to oxygen;	GO:0005751|mitochondrial respiratory chain complex IV;	GO:0016491|oxidoreductase activity;	K02270|cytochrome c oxidase subunit 7a;K02270|cytochrome c oxidase subunit 7a;K02270|cytochrome c oxidase subunit 7a;K02270|cytochrome c oxidase subunit 7a;K02270|cytochrome c oxidase subunit 7a;K02270|cytochrome c oxidase subunit 7a;K02270|cytochrome c oxidase subunit 7a;K02270|cytochrome c oxidase subunit 7a;K02270|cytochrome c oxidase subunit 7a;K02270|cytochrome c oxidase subunit 7a;K02270|cy…	rno00190;rno01100;rno04260;rno04714;rno04932;rno05010;rno05012;rno05014;rno05016;rno05020;rno05022;rno05208;rno05415;	Oxidative phosphorylation;Metabolic pathways;Cardiac muscle contraction;Thermogenesis;Non-alcoholic fatty liver disease;Alzheimer disease;Parkinson disease;Amyotrophic lateral sclerosis;Huntington disease;Prion disease;Pathways of neurodegeneration - multiple diseases;Chemical carcinogenesis - reactive oxygen species;Diabetic cardiomyopathy;
AABR07015422.1	0	0	0	0	0	0	0	0	0	ENSRNOG00000051642	120096829	14	53581079	53581212	-	snoRNA	NA	NA	NA	NA	NA	NA
AABR07015430.1	0	0	0	0	0	0	0	0	0	ENSRNOG00000056117	120096827	14	54040880	54040999	-	snoRNA	NA	NA	NA	NA	NA	NA
AABR07015507.1	336	276	305	277	287	255	321	330	372	ENSRNOG00000051190	501923	14	57711307	57722681	-	protein_coding	GO:0033617|mitochondrial cytochrome c oxidase assembly;	GO:0005576|extracellular region;GO:0005739|mitochondrion;GO:0005743|mitochondrial inner membrane;GO:0016020|membrane;	NA	NA	NA	NA
AABR07015525.1	0	0	0	0	0	0	0	0	0	ENSRNOG00000056900	NA	14	39188096	39188260	-	protein_coding	NA	NA	NA	NA	NA	NA
AABR07015531.1	0	0	0	0	0	0	0	0	0	ENSRNOG00000049999	NA	14	38774079	38774145	-	miRNA	NA	NA	NA	NA	NA	NA
AABR07015547.1	0	0	0	0	0	0	0	0	0	ENSRNOG00000053119	120096807	14	38615698	38615827	-	snoRNA	NA	NA	NA	NA	NA	NA
AABR07015548.1	0	0	0	0	0	0	0	0	0	ENSRNOG00000051998	120096823	14	38479005	38479130	+	snoRNA	NA	NA	NA	NA	NA	NA
AABR07015559.1	0	0	0	0	0	0	0	0	0	ENSRNOG00000055015	NA	14	59725079	59759695	+	protein_coding	NA	NA	NA	NA	NA	NA
AABR07015596.1	0	0	0	0	0	0	0	0	0	ENSRNOG00000048944	289685	14	61233269	61233688	-	protein_coding	NA	NA	NA	NA	NA	NA
AABR07015743.1	6	6	3	6	2	3	4	2	5	ENSRNOG00000029107	498388	14	69045641	69046640	+	protein_coding	GO:0002437|inflammatory response to antigenic stimulus;GO:0008150|biological_process;GO:0010628|positive regulation of gene expression;GO:0010629|negative regulation of gene expression;GO:0032496|response to lipopolysaccharide;GO:0045087|innate immune response;GO:0050767|regulation of neurogenesis;GO:0050829|defense response to Gram-negative bacterium;GO:0050830|defense response to Gram-positive …	GO:0000785|chromatin;GO:0005575|cellular_component;GO:0005615|extracellular space;GO:0005634|nucleus;GO:0005737|cytoplasm;	GO:0000987|cis-regulatory region sequence-specific DNA binding;GO:0003674|molecular_function;	NA	NA	NA
AABR07015759.1	0	0	0	0	0	0	0	0	0	ENSRNOG00000033640	120096627	14	69457383	69457859	-	protein_coding	NA	NA	NA	NA	NA	NA
AABR07015781.1	0	0	0	0	0	0	0	0	0	ENSRNOG00000055664	120096805	14	71288170	71288300	+	snoRNA	NA	NA	NA	NA	NA	NA
AABR07015812.1	0	0	0	0	0	0	0	0	0	ENSRNOG00000038427	102553825	14	73564447	73679357	-	protein_coding	NA	NA	NA	NA	NA	NA
AABR07015838.2	0	0	0	0	0	0	0	0	0	ENSRNOG00000061069	NA	14	74468145	74468203	-	miRNA	NA	NA	NA	NA	NA	NA
AABR07015889.1	1	1	1	7	3	2	3	8	1	ENSRNOG00000059624	NA	14	78776373	78776700	+	protein_coding	NA	NA	NA	NA	NA	NA
AABR07015889.2	0	0	0	0	0	0	0	0	0	ENSRNOG00000060757	120096813	14	78674929	78675059	+	snoRNA	NA	NA	NA	NA	NA	NA
AABR07015941.1	28	9	26	18	22	24	10	19	42	ENSRNOG00000058474	NA	14	81556417	81557011	-	protein_coding	NA	NA	NA	NA	NA	NA
AABR07015977.1	0	0	0	0	0	0	0	0	0	ENSRNOG00000061615	120096659	14	83371636	83371941	+	protein_coding	NA	NA	NA	NA	NA	NA
AABR07016051.1	0	0	0	0	0	0	0	0	0	ENSRNOG00000060641	120096821	14	87312263	87312390	-	snoRNA	NA	NA	NA	NA	NA	NA
AABR07016310.1	0	0	0	0	0	0	0	0	0	ENSRNOG00000048867	108353098	3	1492357	1494821	-	protein_coding	GO:0007276|gamete generation;	NA	NA	NA	NA	NA
AABR07016363.1	1	2	0	1	1	0	0	0	0	ENSRNOG00000057361	120096789	14	89344945	89345050	+	snoRNA	NA	NA	NA	NA	NA	NA
AABR07016566.1	0	0	0	0	0	0	0	0	0	ENSRNOG00000051648	NA	14	94348400	94352182	+	protein_coding	NA	NA	NA	NA	NA	NA
AABR07016578.1	0	0	0	0	0	0	0	0	0	ENSRNOG00000042277	108352809	14	95018011	95018409	-	protein_coding	GO:0006412|translation;	NA	NA	NA	NA	NA
AABR07016612.1	0	1	5	1	0	0	1	3	4	ENSRNOG00000061119	120093047	14	95975590	95975713	+	snoRNA	NA	NA	NA	NA	NA	NA
AABR07016623.1	0	0	1	0	0	0	0	0	0	ENSRNOG00000009240	NA	14	96564646	96565930	+	protein_coding	NA	NA	NA	NA	NA	NA
AABR07016628.1	0	0	0	0	0	0	0	0	0	ENSRNOG00000056048	120096825	14	97141251	97141358	-	snoRNA	NA	NA	NA	NA	NA	NA
AABR07016640.3	0	0	0	0	0	0	0	0	0	ENSRNOG00000058991	NA	14	98002441	98011454	-	protein_coding	NA	NA	NA	NA	NA	NA
AABR07016703.1	0	0	0	0	0	0	0	0	0	ENSRNOG00000052432	120096824	14	100923343	100923449	-	snoRNA	NA	NA	NA	NA	NA	NA
AABR07016779.1	0	0	1	0	0	0	0	0	0	ENSRNOG00000052764	498428	14	103351386	103351706	-	protein_coding	GO:0008150|biological_process;	GO:0005575|cellular_component;	GO:0003674|molecular_function;	NA	NA	NA
AABR07016805.1	0	0	0	0	0	0	0	0	0	ENSRNOG00000028222	NA	14	104452951	104453541	-	protein_coding	NA	NA	NA	NA	NA	NA
AABR07017038.1	0	0	0	0	0	0	0	0	0	ENSRNOG00000057251	120097262	15	5822111	5822212	-	snoRNA	NA	NA	NA	NA	NA	NA
AABR07017046.1	0	0	0	0	0	0	0	0	0	ENSRNOG00000057947	120097263	15	7044183	7044304	-	snoRNA	NA	NA	NA	NA	NA	NA
AABR07017104.1	0	0	0	0	0	0	0	0	0	ENSRNOG00000053976	120097233	15	9795439	9795570	+	snoRNA	NA	NA	NA	NA	NA	NA
AABR07017110.1	208	183	314	171	115	332	103	267	109	ENSRNOG00000005869	498453	15	10400829	10402942	+	protein_coding	GO:0006368|transcription elongation by RNA polymerase II;GO:0030218|erythrocyte differentiation;GO:0045893|positive regulation of DNA-templated transcription;GO:0045944|positive regulation of transcription by RNA polymerase II;	GO:0005654|nucleoplasm;	GO:0003677|DNA binding;GO:0008270|zinc ion binding;	NA	NA	NA
AABR07017124.1	0	0	0	0	0	0	0	0	0	ENSRNOG00000053941	120097215	15	10871528	10871588	+	snoRNA	NA	NA	NA	NA	NA	NA
AABR07017169.1	0	0	0	0	0	0	0	0	0	ENSRNOG00000061838	120097235	15	11542202	11542338	-	snoRNA	NA	NA	NA	NA	NA	NA
AABR07017203.1	0	0	0	0	0	0	0	0	0	ENSRNOG00000057168	120097253	15	16416930	16417062	+	snoRNA	NA	NA	NA	NA	NA	NA
AABR07017227.1	0	0	0	0	0	0	0	0	0	ENSRNOG00000056328	NA	15	18192493	18196866	+	lncRNA	NA	NA	NA	NA	NA	NA
AABR07017236.1	0	0	1	0	0	0	8	3	0	ENSRNOG00000024504	100363368	15	17131907	17150286	+	protein_coding	NA	NA	NA	NA	NA	NA
AABR07017236.2	26	18	24	27	13	18	20	28	28	ENSRNOG00000057837	NA	15	17150173	17174541	+	protein_coding	NA	NA	NA	NA	NA	NA
AABR07017241.1	0	0	0	0	0	0	0	0	0	ENSRNOG00000031307	498475	15	18072361	18081437	-	protein_coding	GO:0006954|inflammatory response;GO:0007186|G protein-coupled receptor signaling pathway;GO:0007204|positive regulation of cytosolic calcium ion concentration;GO:0043303|mast cell degranulation;GO:0051239|regulation of multicellular organismal process;	GO:0005886|plasma membrane;	GO:0004956|prostaglandin D receptor activity;	K04332|prostaglandin D2 receptor;	rno04080;	Neuroactive ligand-receptor interaction;
AABR07017250.1	92	97	67	76	67	65	88	55	109	ENSRNOG00000049099	NA	15	18308615	18309382	+	protein_coding	NA	NA	NA	NA	NA	NA
AABR07017253.1	0	0	0	0	0	0	0	0	0	ENSRNOG00000031251	NA	15	18453946	18454347	-	protein_coding	NA	NA	NA	NA	NA	NA
AABR07017576.1	0	0	0	0	0	0	0	0	0	ENSRNOG00000039487	690384	15	24732680	24733057	+	protein_coding	NA	NA	NA	NA	NA	NA
AABR07017610.1	0	0	0	0	0	0	0	0	0	ENSRNOG00000045632	100911980	15	26712109	26712910	+	protein_coding	NA	NA	NA	NA	NA	NA
AABR07017635.2	0	0	0	0	0	0	0	0	0	ENSRNOG00000061833	NA	15	26059941	26065573	+	lncRNA	NA	NA	NA	NA	NA	NA
AABR07017639.2	0	0	0	0	0	0	0	0	0	ENSRNOG00000055238	NA	15	25769780	25770358	+	protein_coding	NA	NA	NA	NA	NA	NA
AABR07017733.1	0	0	0	0	0	0	0	0	0	ENSRNOG00000049583	691308	15	26209969	26211119	+	protein_coding	NA	NA	NA	NA	NA	NA
AABR07017745.3	0	0	0	0	0	0	0	0	0	ENSRNOG00000054569	NA	15	25889202	25889839	+	protein_coding	NA	NA	NA	NA	NA	NA
AABR07017768.6	0	0	0	0	0	0	0	0	0	ENSRNOG00000059044	NA	15	26756272	26757732	+	protein_coding	NA	NA	NA	NA	NA	NA
AABR07017770.2	0	0	0	0	0	0	0	0	0	ENSRNOG00000061293	NA	15	26984673	26985590	+	protein_coding	NA	NA	NA	NA	NA	NA
AABR07017818.1	0	0	0	0	0	0	0	0	0	ENSRNOG00000051907	NA	15	26940118	26940983	+	protein_coding	NA	NA	NA	NA	NA	NA
AABR07017838.1	0	0	0	0	0	0	0	0	0	ENSRNOG00000039432	NA	15	26924498	26925299	+	protein_coding	NA	NA	NA	NA	NA	NA
AABR07017868.4	0	0	0	0	0	0	0	0	0	ENSRNOG00000056892	NA	15	27077946	27078803	+	protein_coding	NA	NA	NA	NA	NA	NA
AABR07017874.1	0	0	0	0	0	0	0	0	0	ENSRNOG00000042156	NA	15	26493456	26494261	+	protein_coding	NA	NA	NA	NA	NA	NA
AABR07017902.1	1	0	0	0	1	0	2	1	1	ENSRNOG00000009074	NA	15	27109504	27665579	+	protein_coding	NA	NA	NA	NA	NA	NA
AABR07017902.2	0	0	0	0	0	0	0	0	0	ENSRNOG00000042103	120096971	15	27225434	27225910	-	protein_coding	NA	NA	NA	NA	NA	NA
AABR07017917.1	0	0	0	0	0	0	0	0	0	ENSRNOG00000039060	NA	15	29400695	29401168	+	protein_coding	NA	NA	NA	NA	NA	NA
AABR07017999.1	17	10	19	20	13	14	12	10	2	ENSRNOG00000061157	NA	15	30941730	30942043	+	pseudogene	NA	NA	NA	NA	NA	NA
AABR07018028.1	0	0	0	0	0	0	0	0	0	ENSRNOG00000031618	NA	15	30289611	30291562	-	protein_coding	NA	NA	NA	NA	NA	NA
AABR07018038.2	0	0	0	0	0	0	0	0	0	ENSRNOG00000051403	120097219	15	30798288	30798450	-	snoRNA	NA	NA	NA	NA	NA	NA
AABR07018048.2	0	0	0	0	0	0	0	0	0	ENSRNOG00000059279	NA	15	31162829	31172388	+	protein_coding	NA	NA	NA	NA	NA	NA
AABR07018050.1	0	0	0	0	0	0	0	0	0	ENSRNOG00000032148	690335	15	31302329	31302979	+	protein_coding	GO:0006412|translation;	NA	NA	K02893|large subunit ribosomal protein L23Ae;K02893|large subunit ribosomal protein L23Ae;	rno03010;rno05171;	Ribosome;Coronavirus disease - COVID-19;
AABR07018058.1	2	3	0	1	0	0	2	1	1	ENSRNOG00000057750	NA	15	31592001	31592384	-	protein_coding	NA	NA	NA	NA	NA	NA
AABR07018124.1	0	0	0	3	0	0	0	0	0	ENSRNOG00000042281	NA	15	35347734	35348875	-	protein_coding	NA	NA	NA	NA	NA	NA
AABR07018128.2	0	0	1	0	0	0	0	0	0	ENSRNOG00000057970	120097224	15	35777952	35778089	-	snoRNA	NA	NA	NA	NA	NA	NA
AABR07018132.1	0	0	0	0	0	0	0	0	0	ENSRNOG00000045597	NA	15	62422113	62423186	-	protein_coding	NA	NA	NA	NA	NA	NA
AABR07018163.1	0	0	0	0	0	0	0	0	0	ENSRNOG00000061145	120097231	15	41785142	41785272	+	snoRNA	NA	NA	NA	NA	NA	NA
AABR07018167.1	1	1	1	0	0	0	1	0	1	ENSRNOG00000031532	120097172	15	42188259	42189095	+	protein_coding	NA	NA	NA	NA	NA	NA
AABR07018244.1	1	0	1	0	0	0	0	0	1	ENSRNOG00000048585	691975	15	39820330	39820737	+	protein_coding	GO:0006412|translation;	GO:0005840|ribosome;GO:1990904|ribonucleoprotein complex;	GO:0003735|structural constituent of ribosome;	NA	NA	NA
AABR07018244.2	58	65	53	35	43	45	146	139	158	ENSRNOG00000058011	NA	15	39788233	39788853	+	protein_coding	NA	NA	NA	NA	NA	NA
AABR07018269.1	0	0	0	0	0	0	0	0	0	ENSRNOG00000031720	NA	15	43044933	43046356	-	protein_coding	NA	NA	NA	NA	NA	NA
AABR07018273.2	10	7	4	5	4	17	5	7	13	ENSRNOG00000050211	NA	15	43411907	43412509	-	pseudogene	NA	NA	NA	NA	NA	NA
AABR07018326.1	0	0	0	0	0	0	0	0	0	ENSRNOG00000026247	691997	15	44921886	45134191	+	protein_coding	GO:0008150|biological_process;	GO:0005575|cellular_component;	GO:0003674|molecular_function;	NA	NA	NA
AABR07018438.2	0	0	0	0	0	0	0	0	0	ENSRNOG00000055553	120097216	15	51159220	51159349	+	snoRNA	NA	NA	NA	NA	NA	NA
AABR07018533.1	36	29	26	29	41	32	63	38	70	ENSRNOG00000048927	100361180	15	57178469	57178978	-	protein_coding	GO:0006412|translation;	GO:0005840|ribosome;GO:1990904|ribonucleoprotein complex;	GO:0003735|structural constituent of ribosome;	K02962|small subunit ribosomal protein S17e;K02962|small subunit ribosomal protein S17e;	rno03010;rno05171;	Ribosome;Coronavirus disease - COVID-19;
AABR07018556.1	0	0	0	0	0	0	0	0	0	ENSRNOG00000049650	NA	15	62426733	62427809	+	protein_coding	NA	NA	NA	NA	NA	NA
AABR07018627.1	0	0	0	0	0	0	0	0	0	ENSRNOG00000038122	103693740	15	58759343	58759666	+	protein_coding	GO:0006122|mitochondrial electron transport, ubiquinol to cytochrome c;	GO:0005750|mitochondrial respiratory chain complex III;	NA	NA	NA	NA
AABR07018632.1	0	0	0	0	0	0	0	0	0	ENSRNOG00000055101	120097242	15	59067597	59067728	+	snoRNA	NA	NA	NA	NA	NA	NA
AABR07018646.1	0	0	0	0	0	0	0	0	0	ENSRNOG00000033366	NA	15	59673927	59675144	+	protein_coding	NA	NA	NA	NA	NA	NA
AABR07018806.2	0	0	0	0	0	0	0	0	0	ENSRNOG00000054735	120097252	15	66551806	66551936	+	snoRNA	NA	NA	NA	NA	NA	NA
AABR07018819.1	0	0	0	0	0	0	0	0	0	ENSRNOG00000056306	120097254	15	67288781	67288910	-	snoRNA	NA	NA	NA	NA	NA	NA
AABR07018851.1	0	0	0	0	0	0	0	0	0	ENSRNOG00000054766	120097257	15	68670107	68670234	-	snoRNA	NA	NA	NA	NA	NA	NA
AABR07018924.1	0	0	0	0	0	0	0	0	0	ENSRNOG00000057109	120097225	15	71762246	71762373	-	snoRNA	NA	NA	NA	NA	NA	NA
AABR07018965.1	0	0	0	0	0	0	0	0	0	ENSRNOG00000058865	120097259	15	74044622	74044753	-	snoRNA	NA	NA	NA	NA	NA	NA
AABR07018976.1	0	0	0	0	1	0	0	0	0	ENSRNOG00000038041	364450	15	75010179	75010634	-	protein_coding	GO:0006412|translation;	NA	NA	NA	NA	NA
AABR07019031.1	0	0	0	0	0	0	0	0	0	ENSRNOG00000058181	120097237	15	77190489	77190617	+	snoRNA	NA	NA	NA	NA	NA	NA
AABR07019061.1	0	0	0	0	0	0	0	0	0	ENSRNOG00000009521	100361126	15	78452211	78452405	-	protein_coding	GO:0006122|mitochondrial electron transport, ubiquinol to cytochrome c;	GO:0005750|mitochondrial respiratory chain complex III;	NA	K00419|ubiquinol-cytochrome c reductase subunit 9;K00419|ubiquinol-cytochrome c reductase subunit 9;K00419|ubiquinol-cytochrome c reductase subunit 9;K00419|ubiquinol-cytochrome c reductase subunit 9;K00419|ubiquinol-cytochrome c reductase subunit 9;K00419|ubiquinol-cytochrome c reductase subunit 9;K00419|ubiquinol-cytochrome c reductase subunit 9;K00419|ubiquinol-cytochrome c reductase subunit 9…	rno00190;rno01100;rno04260;rno04714;rno04932;rno05010;rno05012;rno05014;rno05016;rno05020;rno05022;rno05208;rno05415;	Oxidative phosphorylation;Metabolic pathways;Cardiac muscle contraction;Thermogenesis;Non-alcoholic fatty liver disease;Alzheimer disease;Parkinson disease;Amyotrophic lateral sclerosis;Huntington disease;Prion disease;Pathways of neurodegeneration - multiple diseases;Chemical carcinogenesis - reactive oxygen species;Diabetic cardiomyopathy;
AABR07019088.1	2	1	3	0	1	6	5	1	10	ENSRNOG00000057291	NA	9	60098187	60129134	-	lncRNA	NA	NA	NA	NA	NA	NA
AABR07019099.2	0	0	0	0	0	0	0	0	0	ENSRNOG00000061287	120097236	15	81416097	81416227	-	snoRNA	NA	NA	NA	NA	NA	NA
AABR07019101.1	0	0	0	0	0	0	0	0	0	ENSRNOG00000057576	120097260	15	81756439	81756561	+	snoRNA	NA	NA	NA	NA	NA	NA
AABR07019143.1	0	0	0	0	0	0	0	0	0	ENSRNOG00000056111	120097270	15	83553958	83554033	+	snoRNA	NA	NA	NA	NA	NA	NA
AABR07019224.1	0	0	0	0	0	0	0	0	0	ENSRNOG00000056766	120097269	15	86753735	86753851	-	snoRNA	NA	NA	NA	NA	NA	NA
AABR07019341.1	7	5	3	4	1	2	5	4	3	ENSRNOG00000031960	102548369	15	92259763	92260203	-	protein_coding	GO:0006412|translation;	NA	NA	NA	NA	NA
AABR07019387.2	0	0	0	0	0	0	0	0	0	ENSRNOG00000058525	120097261	15	95362775	95362881	+	snoRNA	NA	NA	NA	NA	NA	NA
AABR07019403.1	1699	1588	1596	1532	1556	1493	1081	965	1356	ENSRNOG00000058057	361091	15	96074564	96237806	-	protein_coding	GO:0006486|protein glycosylation;GO:0097359|UDP-glucosylation;	GO:0016020|membrane;GO:0032991|protein-containing complex;	GO:0003980|UDP-glucose:glycoprotein glucosyltransferase activity;	K11718|UDP-glucose:glycoprotein glucosyltransferase [EC:2.4.1.-];	rno04141;	Protein processing in endoplasmic reticulum;
AABR07019442.1	0	0	0	1	0	0	0	0	0	ENSRNOG00000059922	NA	15	97686537	97687867	+	lncRNA	NA	NA	NA	NA	NA	NA
AABR07019572.1	0	5	0	0	1	0	0	1	0	ENSRNOG00000053495	120097221	15	100076623	100076728	+	snoRNA	NA	NA	NA	NA	NA	NA
AABR07019593.1	0	0	0	0	0	0	0	0	0	ENSRNOG00000057990	120097275	15	100826536	100826663	+	snRNA	NA	NA	NA	NA	NA	NA
AABR07019744.1	0	0	0	0	0	0	0	0	0	ENSRNOG00000060375	120096408	13	383102	383229	+	snoRNA	NA	NA	NA	NA	NA	NA
AABR07019774.1	0	0	0	0	0	0	0	0	0	ENSRNOG00000053352	120096416	13	1056334	1056453	-	snoRNA	NA	NA	NA	NA	NA	NA
AABR07019802.1	0	0	0	0	0	0	0	0	0	ENSRNOG00000057029	120096390	13	2087688	2087811	-	snoRNA	NA	NA	NA	NA	NA	NA
AABR07019903.2	0	0	0	0	0	0	0	0	0	ENSRNOG00000052250	120096404	13	3698252	3698384	-	snoRNA	NA	NA	NA	NA	NA	NA
AABR07019911.1	0	0	0	0	0	0	0	0	0	ENSRNOG00000059242	120096409	13	4130358	4130486	-	snoRNA	NA	NA	NA	NA	NA	NA
AABR07020125.1	0	0	0	0	0	0	0	0	0	ENSRNOG00000054606	120096412	13	12240849	12240975	+	snoRNA	NA	NA	NA	NA	NA	NA
AABR07020325.1	0	0	0	0	0	0	0	0	0	ENSRNOG00000059684	120096398	13	18422966	18423097	-	snoRNA	NA	NA	NA	NA	NA	NA
AABR07020463.1	0	0	0	0	0	0	0	0	0	ENSRNOG00000046941	NA	2	85713807	85723421	+	protein_coding	NA	NA	NA	NA	NA	NA
AABR07020485.1	0	0	0	0	0	0	0	0	0	ENSRNOG00000054449	120096395	13	23962966	23963097	+	snoRNA	NA	NA	NA	NA	NA	NA
AABR07020548.1	0	0	0	0	0	0	0	0	0	ENSRNOG00000053016	120096381	13	26154724	26154795	-	snoRNA	NA	NA	NA	NA	NA	NA
AABR07020550.1	0	0	0	0	0	0	0	0	0	ENSRNOG00000051373	120096411	13	26232166	26232296	-	snoRNA	NA	NA	NA	NA	NA	NA
AABR07020651.1	0	0	0	0	0	0	0	0	0	ENSRNOG00000053423	NA	13	10882231	10884055	-	protein_coding	NA	NA	NA	NA	NA	NA
AABR07020774.1	0	0	0	0	0	0	0	0	0	ENSRNOG00000058901	120096396	13	34662513	34662643	-	snoRNA	NA	NA	NA	NA	NA	NA
AABR07020879.1	7	3	5	2	2	10	8	6	7	ENSRNOG00000003952	289001	13	39300163	39343767	-	protein_coding	NA	NA	GO:0005524|ATP binding;	NA	NA	NA
AABR07020880.1	0	0	0	0	0	0	0	0	0	ENSRNOG00000054237	120096387	13	39363603	39363733	+	snoRNA	NA	NA	NA	NA	NA	NA
AABR07020987.1	15	5	2	1	7	6	10	19	11	ENSRNOG00000059225	NA	13	45420329	45430345	+	lncRNA	NA	NA	NA	NA	NA	NA
AABR07020999.1	0	0	1	1	1	0	2	2	3	ENSRNOG00000026400	NA	13	47019370	47020923	+	protein_coding	NA	NA	NA	NA	NA	NA
AABR07021008.1	0	0	0	0	0	4	1	0	0	ENSRNOG00000030278	289401	13	47860235	47860609	+	protein_coding	NA	NA	NA	NA	NA	NA
AABR07021022.1	4	5	2	1	3	4	2	6	12	ENSRNOG00000029425	NA	13	48284779	48286090	-	protein_coding	NA	NA	NA	NA	NA	NA
AABR07021039.1	0	0	0	0	0	0	0	0	0	ENSRNOG00000054095	120096418	13	48861661	48861776	-	snoRNA	NA	NA	NA	NA	NA	NA
AABR07021066.1	0	0	0	0	0	0	0	0	0	ENSRNOG00000039332	691495	X	1336294	1336629	-	protein_coding	NA	NA	NA	NA	NA	NA
AABR07021080.1	0	0	0	0	0	0	0	0	0	ENSRNOG00000055999	NA	13	50555201	50555916	+	protein_coding	NA	NA	NA	NA	NA	NA
AABR07021086.1	0	0	0	0	0	0	0	0	0	ENSRNOG00000022174	102552334	13	59426675	59485111	-	protein_coding	NA	NA	NA	NA	NA	NA
AABR07021213.1	0	0	0	0	0	0	0	0	0	ENSRNOG00000055995	NA	13	55772925	55781885	-	lncRNA	NA	NA	NA	NA	NA	NA
AABR07021239.1	0	0	0	0	0	0	0	0	0	ENSRNOG00000025794	NA	13	57408076	57408351	-	processed_pseudogene	NA	NA	NA	NA	NA	NA
AABR07021306.1	0	0	0	0	0	0	0	0	0	ENSRNOG00000060279	120096400	13	60151427	60151558	-	snoRNA	NA	NA	NA	NA	NA	NA
AABR07021307.1	0	0	0	0	0	0	0	0	0	ENSRNOG00000052146	120096405	13	60328763	60328895	-	snoRNA	NA	NA	NA	NA	NA	NA
AABR07021337.1	0	0	0	0	0	0	0	0	0	ENSRNOG00000053385	120096420	13	61442563	61442671	-	snoRNA	NA	NA	NA	NA	NA	NA
AABR07021384.1	4	2	2	4	1	5	2	3	3	ENSRNOG00000029859	108352551	13	63894996	63895466	-	protein_coding	GO:0006412|translation;	NA	NA	NA	NA	NA
AABR07021424.1	0	0	0	0	0	0	0	0	0	ENSRNOG00000026940	NA	13	65972938	65978052	-	protein_coding	NA	NA	NA	NA	NA	NA
AABR07021433.1	0	0	0	0	0	0	0	0	0	ENSRNOG00000052403	120096399	13	66219400	66219531	-	snoRNA	NA	NA	NA	NA	NA	NA
AABR07021463.1	0	0	0	0	0	0	0	0	0	ENSRNOG00000042995	501858	13	68187366	68187854	+	protein_coding	NA	NA	NA	NA	NA	NA
AABR07021465.1	4	3	6	1	4	2	9	9	6	ENSRNOG00000051405	501861	13	68458411	68544172	-	protein_coding	NA	NA	NA	NA	NA	NA
AABR07021465.2	0	1	1	0	0	0	1	2	4	ENSRNOG00000058710	NA	13	68389916	68391901	+	protein_coding	NA	NA	NA	NA	NA	NA
AABR07021503.1	63	39	60	59	41	40	17	33	17	ENSRNOG00000051166	NA	13	69667227	69681145	+	lncRNA	NA	NA	NA	NA	NA	NA
AABR07021536.1	0	0	0	0	0	0	0	0	1	ENSRNOG00000051261	NA	13	71751808	71974670	+	lncRNA	NA	NA	NA	NA	NA	NA
AABR07021548.1	0	0	0	0	0	0	0	0	0	ENSRNOG00000058929	120096380	13	72568138	72568277	-	snoRNA	NA	NA	NA	NA	NA	NA
AABR07021559.1	0	0	0	0	0	0	0	0	0	ENSRNOG00000057985	120096410	13	72867670	72867801	+	snoRNA	NA	NA	NA	NA	NA	NA
AABR07021573.2	1	0	7	2	2	1	1	0	0	ENSRNOG00000026917	NA	13	73653887	73655454	+	protein_coding	NA	NA	NA	NA	NA	NA
AABR07021591.1	371	362	373	381	400	329	147	195	72	ENSRNOG00000029459	NA	13	74582858	74583313	+	protein_coding	NA	NA	NA	NA	NA	NA
AABR07021603.1	0	0	0	0	0	0	0	0	0	ENSRNOG00000059797	120096402	13	75407826	75407928	-	snoRNA	NA	NA	NA	NA	NA	NA
AABR07021636.1	0	0	0	0	0	0	0	0	0	ENSRNOG00000056222	NA	13	77174320	77218989	-	lncRNA	NA	NA	NA	NA	NA	NA
AABR07021734.1	75	28	50	47	50	33	48	35	36	ENSRNOG00000059957	498273	13	82435520	82437158	+	protein_coding	GO:0006597|spermine biosynthetic process;	NA	GO:0016768|spermine synthase activity;	NA	NA	NA
AABR07021736.1	0	0	0	0	0	0	0	0	0	ENSRNOG00000034300	NA	13	82665892	82666533	+	protein_coding	NA	NA	NA	NA	NA	NA
AABR07021759.1	3	6	11	13	5	6	9	11	9	ENSRNOG00000023269	NA	X	58982024	58982977	-	pseudogene	NA	NA	NA	NA	NA	NA
AABR07021812.1	5	13	4	4	5	14	3	1	3	ENSRNOG00000061764	100360457	13	86453926	86771411	+	protein_coding	GO:0006974|cellular response to DNA damage stimulus;GO:0016192|vesicle-mediated transport;GO:0016344|meiotic chromosome movement towards spindle pole;GO:0016477|cell migration;GO:0031532|actin cytoskeleton reorganization;GO:0040038|polar body extrusion after meiotic divisions;GO:0042177|negative regulation of protein catabolic process;GO:0043066|negative regulation of apoptotic process;GO:0045010…	GO:0005634|nucleus;GO:0005730|nucleolus;GO:0005783|endoplasmic reticulum;GO:0005789|endoplasmic reticulum membrane;GO:0005819|spindle;GO:0005829|cytosol;GO:0005884|actin filament;GO:0005902|microvillus;GO:0005938|cell cortex;GO:0015629|actin cytoskeleton;GO:0030659|cytoplasmic vesicle membrane;	GO:0003779|actin binding;GO:0008017|microtubule binding;	NA	NA	NA
AABR07021826.1	0	0	0	0	0	0	0	0	0	ENSRNOG00000061817	120096415	13	87994372	87994492	+	snoRNA	NA	NA	NA	NA	NA	NA
AABR07021863.1	9	7	6	7	2	4	3	4	8	ENSRNOG00000056537	689786	13	89819244	89950979	+	protein_coding	NA	GO:0036128|CatSper complex;GO:0097228|sperm principal piece;	NA	NA	NA	NA
AABR07021871.1	22	25	21	18	22	15	20	18	23	ENSRNOG00000031864	498293	13	90044753	90045664	+	protein_coding	NA	NA	NA	NA	NA	NA
AABR07021955.1	697	563	730	628	629	620	394	345	374	ENSRNOG00000052574	89789	13	93538920	93564017	-	protein_coding	GO:0000278|mitotic cell cycle;GO:0006695|cholesterol biosynthetic process;GO:0030223|neutrophil differentiation;	GO:0005634|nucleus;GO:0005635|nuclear envelope;GO:0005637|nuclear inner membrane;GO:0005643|nuclear pore;GO:0005737|cytoplasm;GO:0005789|endoplasmic reticulum membrane;GO:0016020|membrane;GO:0031965|nuclear membrane;	GO:0003677|DNA binding;GO:0005515|protein binding;GO:0008139|nuclear localization sequence binding;GO:0016628|oxidoreductase activity, acting on the CH-CH group of donors, NAD or NADP as acceptor;GO:0050613|delta14-sterol reductase activity;GO:0051087|chaperone binding;GO:0070087|chromo shadow domain binding;GO:0070402|NADPH binding;	K19532|Delta14-sterol reductase (lamin-B receptor) [EC:1.3.1.70];K19532|Delta14-sterol reductase (lamin-B receptor) [EC:1.3.1.70];	rno00100;rno01100;	Steroid biosynthesis;Metabolic pathways;
AABR07021972.1	0	0	0	0	0	0	0	0	0	ENSRNOG00000052815	120096379	13	94591023	94591101	-	snoRNA	NA	NA	NA	NA	NA	NA
AABR07022022.1	0	0	0	0	0	0	0	0	0	ENSRNOG00000023547	120096209	13	96691414	96692373	-	protein_coding	NA	NA	GO:0051287|NAD binding;	NA	NA	NA
AABR07022023.1	0	0	0	0	2	0	0	0	0	ENSRNOG00000046240	NA	13	96976550	96977037	-	pseudogene	NA	NA	NA	NA	NA	NA
AABR07022046.1	2	3	0	0	0	0	0	0	0	ENSRNOG00000023091	NA	1	4171926	4172641	-	protein_coding	NA	NA	NA	NA	NA	NA
AABR07022098.1	0	0	0	3	0	0	0	0	0	ENSRNOG00000056214	NA	13	100555784	100577865	+	lncRNA	NA	NA	NA	NA	NA	NA
AABR07022144.1	206	166	202	168	193	187	169	226	239	ENSRNOG00000046460	289378	13	102634258	102649063	-	protein_coding	NA	NA	GO:0016788|hydrolase activity, acting on ester bonds;	NA	NA	NA
AABR07022157.1	0	0	0	2	0	0	2	0	0	ENSRNOG00000031098	289384	13	103269834	103270115	+	protein_coding	GO:0006412|translation;	NA	GO:0003735|structural constituent of ribosome;GO:0019843|rRNA binding;GO:0046872|metal ion binding;	NA	NA	NA
AABR07022168.1	1	0	1	3	2	2	3	2	0	ENSRNOG00000059863	NA	13	103489714	103491751	-	protein_coding	NA	NA	NA	NA	NA	NA
AABR07022212.1	0	0	0	0	0	0	0	0	0	ENSRNOG00000058390	120096389	13	106209168	106209272	-	snoRNA	NA	NA	NA	NA	NA	NA
AABR07024115.1	0	0	0	0	0	0	0	0	0	ENSRNOG00000030242	108353424	20	12825606	12825815	+	protein_coding	GO:0006412|translation;	NA	NA	NA	NA	NA
AABR07024360.1	0	0	0	0	0	0	0	0	0	ENSRNOG00000054635	NA	8	110895752	110897455	-	pseudogene	NA	NA	NA	NA	NA	NA
AABR07024439.1	0	0	0	0	0	0	0	0	0	ENSRNOG00000046132	NA	16	35586200	35651524	-	protein_coding	NA	NA	NA	NA	NA	NA
AABR07024442.1	0	0	0	0	0	0	0	0	0	ENSRNOG00000046720	NA	16	35600929	35664489	-	protein_coding	NA	NA	NA	NA	NA	NA
AABR07024500.1	0	1	0	1	2	1	0	0	0	ENSRNOG00000056629	103693862	16	1339784	1340056	+	protein_coding	GO:0006397|mRNA processing;GO:0008380|RNA splicing;	GO:0005681|spliceosomal complex;	GO:0003723|RNA binding;	NA	NA	NA
AABR07024534.1	0	0	0	0	0	0	0	0	0	ENSRNOG00000025433	NA	16	1528440	1537082	+	protein_coding	NA	NA	NA	NA	NA	NA
AABR07024580.2	0	0	0	0	1	1	0	0	0	ENSRNOG00000060595	120097588	16	5857173	5857312	-	snoRNA	NA	NA	NA	NA	NA	NA
AABR07024597.1	0	0	0	0	0	0	0	0	0	ENSRNOG00000057346	120097592	16	7164275	7164418	+	snoRNA	NA	NA	NA	NA	NA	NA
AABR07024624.1	0	0	0	0	0	0	0	0	0	ENSRNOG00000057503	120097603	16	8468229	8468351	+	snoRNA	NA	NA	NA	NA	NA	NA
AABR07024637.1	0	0	0	0	0	0	0	0	0	ENSRNOG00000029131	498583	16	8757705	8877303	+	protein_coding	GO:0070830|bicellular tight junction assembly;	GO:0005856|cytoskeleton;GO:0005923|bicellular tight junction;GO:0016323|basolateral plasma membrane;	GO:0005545|1-phosphatidylinositol binding;	NA	NA	NA
AABR07024652.1	0	0	0	0	0	0	0	0	0	ENSRNOG00000060767	100910026	16	9300059	9330625	-	protein_coding	NA	GO:0016020|membrane;	GO:0038023|signaling receptor activity;	NA	NA	NA
AABR07024653.1	0	0	0	0	0	0	0	0	0	ENSRNOG00000055677	681303	16	9332418	9355173	+	protein_coding	NA	GO:0016020|membrane;	GO:0038023|signaling receptor activity;	NA	NA	NA
AABR07024656.1	0	0	0	0	0	0	0	0	0	ENSRNOG00000051587	120097604	16	9418786	9418914	+	snoRNA	NA	NA	NA	NA	NA	NA
AABR07024724.1	0	0	0	0	0	0	0	0	0	ENSRNOG00000053759	NA	16	11410545	11413344	-	protein_coding	NA	NA	NA	NA	NA	NA
AABR07024737.1	0	0	0	0	0	0	0	0	0	ENSRNOG00000058759	120097615	16	12338568	12338687	+	snoRNA	NA	NA	NA	NA	NA	NA
AABR07024742.1	0	0	0	0	0	1	0	2	0	ENSRNOG00000030299	685718	16	12476735	12477253	+	protein_coding	NA	NA	NA	NA	NA	NA
AABR07024795.1	0	0	0	0	0	0	0	1	0	ENSRNOG00000028958	290604	16	15370293	15371300	+	protein_coding	GO:0006006|glucose metabolic process;	NA	GO:0050661|NADP binding;GO:0051287|NAD binding;	K00134|glyceraldehyde 3-phosphate dehydrogenase (phosphorylating) [EC:1.2.1.12];K00134|glyceraldehyde 3-phosphate dehydrogenase (phosphorylating) [EC:1.2.1.12];K00134|glyceraldehyde 3-phosphate dehydrogenase (phosphorylating) [EC:1.2.1.12];K00134|glyceraldehyde 3-phosphate dehydrogenase (phosphorylating) [EC:1.2.1.12];K00134|glyceraldehyde 3-phosphate dehydrogenase (phosphorylating) [EC:1.2.1.12]…	rno00010;rno01100;rno01200;rno01230;rno04066;rno05010;rno05132;rno05415;	Glycolysis / Gluconeogenesis;Metabolic pathways;Carbon metabolism;Biosynthesis of amino acids;HIF-1 signaling pathway;Alzheimer disease;Salmonella infection;Diabetic cardiomyopathy;
AABR07024869.1	0	0	0	0	1	0	0	1	0	ENSRNOG00000059970	NA	16	18386083	18386582	-	pseudogene	NA	NA	NA	NA	NA	NA
AABR07024885.1	0	0	0	0	0	0	0	0	0	ENSRNOG00000056455	120097580	16	19759122	19759293	-	snoRNA	NA	NA	NA	NA	NA	NA
AABR07024954.1	0	0	0	0	0	0	0	0	0	ENSRNOG00000012174	290678	16	20703060	20703551	-	protein_coding	NA	NA	NA	NA	NA	NA
AABR07024964.1	1	0	0	0	0	0	1	0	1	ENSRNOG00000029606	317036	16	21108942	21109883	-	protein_coding	GO:0000349|generation of catalytic spliceosome for first transesterification step;	NA	GO:0046872|metal ion binding;	NA	NA	NA
AABR07024975.1	0	0	0	0	0	0	0	0	0	ENSRNOG00000054717	120097601	16	21692464	21692591	-	snoRNA	NA	NA	NA	NA	NA	NA
AABR07024991.1	0	0	0	0	0	0	0	0	0	ENSRNOG00000052855	120097605	16	22410187	22410318	+	snoRNA	NA	NA	NA	NA	NA	NA
AABR07024995.1	0	0	0	0	0	0	0	0	0	ENSRNOG00000057492	120097582	16	22689281	22689366	-	snoRNA	NA	NA	NA	NA	NA	NA
AABR07025010.1	0	0	0	0	0	0	0	0	0	ENSRNOG00000033057	NA	16	46413378	46414771	+	protein_coding	NA	NA	NA	NA	NA	NA
AABR07025051.3	0	0	0	0	0	0	0	0	0	ENSRNOG00000054322	NA	16	24702752	24703410	+	protein_coding	NA	NA	NA	NA	NA	NA
AABR07025074.1	0	0	0	0	0	0	0	0	0	ENSRNOG00000032550	NA	16	25584241	25585849	-	protein_coding	NA	NA	NA	NA	NA	NA
AABR07025089.1	0	1	0	0	2	0	1	0	1	ENSRNOG00000032995	NA	16	26091905	26186434	-	protein_coding	NA	NA	NA	NA	NA	NA
AABR07025140.1	1	0	0	0	0	0	0	0	0	ENSRNOG00000059097	100360801	16	28076999	28179526	-	protein_coding	GO:0009615|response to virus;GO:0051607|defense response to virus;GO:1900245|positive regulation of MDA-5 signaling pathway;GO:1900246|positive regulation of RIG-I signaling pathway;	GO:0005737|cytoplasm;GO:0005829|cytosol;GO:0045111|intermediate filament cytoskeleton;	GO:0003690|double-stranded DNA binding;GO:0003723|RNA binding;GO:0003725|double-stranded RNA binding;GO:0003727|single-stranded RNA binding;GO:0005524|ATP binding;	NA	NA	NA
AABR07025152.1	0	0	0	0	0	0	0	0	0	ENSRNOG00000054002	NA	Y	8351392	8616507	+	lncRNA	NA	NA	NA	NA	NA	NA
AABR07025272.1	0	0	0	0	0	0	0	0	0	ENSRNOG00000056947	120097562	16	27840998	27951324	-	protein_coding	NA	NA	GO:0003676|nucleic acid binding;GO:0005524|ATP binding;	NA	NA	NA
AABR07025301.1	13	7	19	38	11	8	3	3	8	ENSRNOG00000060395	100360260	16	29188184	29188562	-	protein_coding	NA	NA	NA	NA	NA	NA
AABR07025348.1	0	0	0	0	0	0	0	0	0	ENSRNOG00000060942	120097591	16	31337284	31337427	-	snoRNA	NA	NA	NA	NA	NA	NA
AABR07025360.1	0	0	0	0	0	0	0	0	0	ENSRNOG00000051984	120097629	16	31843733	31843853	+	snRNA	NA	NA	NA	NA	NA	NA
AABR07025594.2	0	0	0	0	0	0	0	0	0	ENSRNOG00000060692	120097600	16	38299994	38300125	-	snoRNA	NA	NA	NA	NA	NA	NA
AABR07025617.1	0	0	0	0	0	0	0	0	0	ENSRNOG00000052262	120097622	16	39145529	39145633	-	snoRNA	NA	NA	NA	NA	NA	NA
AABR07025743.1	2	0	0	0	0	0	1	0	1	ENSRNOG00000033638	NA	16	44614226	44616426	-	protein_coding	NA	NA	NA	NA	NA	NA
AABR07025757.1	0	0	0	0	0	0	0	0	0	ENSRNOG00000053529	NA	16	45081969	45083072	+	pseudogene	NA	NA	NA	NA	NA	NA
AABR07025762.1	0	0	0	0	0	0	0	0	0	ENSRNOG00000030778	685135	16	45369386	45369682	+	protein_coding	NA	NA	NA	NA	NA	NA
AABR07025774.1	0	0	0	0	0	0	0	0	0	ENSRNOG00000059902	120097625	16	45882552	45882683	-	snoRNA	NA	NA	NA	NA	NA	NA
AABR07025818.1	0	0	0	0	0	0	0	0	0	ENSRNOG00000052883	NA	16	48598506	48599444	+	protein_coding	NA	NA	NA	NA	NA	NA
AABR07025819.1	0	0	0	0	0	0	0	0	1	ENSRNOG00000038744	306478	16	48628407	48628892	+	protein_coding	GO:0008150|biological_process;GO:0015986|proton motive force-driven ATP synthesis;GO:1902600|proton transmembrane transport;	GO:0000276|mitochondrial proton-transporting ATP synthase complex, coupling factor F(o);GO:0005575|cellular_component;	GO:0003674|molecular_function;GO:0015078|proton transmembrane transporter activity;	NA	NA	NA
AABR07025896.1	10	7	9	8	6	6	2	1	8	ENSRNOG00000052858	NA	16	51348173	51348550	+	protein_coding	NA	NA	NA	NA	NA	NA
AABR07025928.1	0	0	0	0	2	0	0	0	2	ENSRNOG00000056660	NA	4	51682224	51682961	+	protein_coding	NA	NA	NA	NA	NA	NA
AABR07025957.1	0	0	0	0	0	0	0	0	0	ENSRNOG00000057559	120097620	16	53355863	53355986	+	snoRNA	NA	NA	NA	NA	NA	NA
AABR07026002.1	34	37	36	37	27	27	50	62	35	ENSRNOG00000032376	688765	16	55236322	55246650	-	protein_coding	NA	NA	NA	NA	NA	NA
AABR07026032.1	5	8	2	2	3	0	98	134	90	ENSRNOG00000054809	100910088	16	56422138	56471065	-	protein_coding	GO:0006897|endocytosis;	GO:0016020|membrane;	GO:0005509|calcium ion binding;	NA	NA	NA
AABR07026048.1	0	0	0	0	0	0	0	0	0	ENSRNOG00000031879	NA	16	57429904	57430428	+	protein_coding	NA	NA	NA	NA	NA	NA
AABR07026058.1	4	9	4	3	7	2	3	4	5	ENSRNOG00000050067	100364509	16	58156236	58166965	-	protein_coding	GO:0006412|translation;	NA	NA	NA	NA	NA
AABR07026059.1	0	0	0	0	0	0	0	0	0	ENSRNOG00000031959	NA	16	58211526	58219665	+	protein_coding	NA	NA	NA	NA	NA	NA
AABR07026240.1	0	0	0	0	0	0	0	0	0	ENSRNOG00000038458	108348409	16	65118280	65118762	-	protein_coding	GO:0006412|translation;	NA	NA	NA	NA	NA
AABR07026240.2	0	0	0	0	0	0	0	1	0	ENSRNOG00000061711	120097397	16	65100765	65101082	-	protein_coding	NA	NA	NA	NA	NA	NA
AABR07026270.1	0	1	2	1	1	0	0	0	0	ENSRNOG00000061428	102554647	X	149620972	149638675	+	protein_coding	GO:0042754|negative regulation of circadian rhythm;GO:0045892|negative regulation of DNA-templated transcription;	GO:0005634|nucleus;GO:0016607|nuclear speck;GO:1990512|Cry-Per complex;	GO:0140297|DNA-binding transcription factor binding;GO:0140416|transcription regulator inhibitor activity;	NA	NA	NA
AABR07026291.1	914	786	904	783	787	775	813	675	687	ENSRNOG00000014275	306548	16	65954350	66061338	+	protein_coding	GO:0007032|endosome organization;GO:0007040|lysosome organization;GO:0008333|endosome to lysosome transport;GO:0022027|interkinetic nuclear migration;GO:0030705|cytoskeleton-dependent intracellular transport;GO:0031122|cytoplasmic microtubule organization;GO:0034454|microtubule anchoring at centrosome;GO:0045022|early endosome to late endosome transport;GO:0050768|negative regulation of neurogene…	GO:0000242|pericentriolar material;GO:0005737|cytoplasm;GO:0005801|cis-Golgi network;GO:0005813|centrosome;GO:0005829|cytosol;GO:0005874|microtubule;GO:0034451|centriolar satellite;GO:0070695|FHF complex;	GO:0005515|protein binding;GO:0008017|microtubule binding;GO:0034452|dynactin binding;GO:0042802|identical protein binding;GO:0045503|dynein light chain binding;GO:0045505|dynein intermediate chain binding;	K16536|protein HOOK3;	rno04814;	Motor proteins;
AABR07026305.1	11	12	8	10	11	19	39	25	45	ENSRNOG00000058810	120097583	16	66502824	66502950	+	snoRNA	NA	NA	NA	NA	NA	NA
AABR07026311.1	204	140	158	143	159	158	56	43	87	ENSRNOG00000038375	100360145	16	66654287	66655279	+	protein_coding	NA	GO:0000786|nucleosome;GO:0005634|nucleus;	GO:0003677|DNA binding;GO:0030527|structural constituent of chromatin;GO:0046982|protein heterodimerization activity;	NA	NA	NA
AABR07026317.1	145	120	127	106	111	121	216	178	254	ENSRNOG00000049442	NA	16	66797875	66808775	+	protein_coding	NA	NA	NA	NA	NA	NA
AABR07026424.1	11	2	7	7	4	4	15	7	5	ENSRNOG00000038106	NA	16	70994128	70994606	-	protein_coding	NA	NA	NA	NA	NA	NA
AABR07026427.1	0	0	0	0	0	0	0	0	0	ENSRNOG00000059650	120097621	16	71212217	71212319	+	snoRNA	NA	NA	NA	NA	NA	NA
AABR07026430.1	0	0	0	0	0	0	0	0	0	ENSRNOG00000051475	120097623	16	71529068	71529192	+	snoRNA	NA	NA	NA	NA	NA	NA
AABR07026503.2	0	0	0	0	0	0	0	0	0	ENSRNOG00000054043	120097613	16	74424479	74424603	+	snoRNA	NA	NA	NA	NA	NA	NA
AABR07026539.1	0	0	0	0	0	0	0	2	1	ENSRNOG00000031681	NA	16	77105197	77105984	-	protein_coding	NA	NA	NA	NA	NA	NA
AABR07026557.1	4	4	3	5	2	5	2	6	2	ENSRNOG00000053136	NA	16	77822278	77847735	+	protein_coding	NA	NA	NA	NA	NA	NA
AABR07026565.1	53	52	58	48	56	62	15	7	8	ENSRNOG00000056874	NA	16	78435695	78470156	-	lncRNA	NA	NA	NA	NA	NA	NA
AABR07026596.2	0	0	0	0	0	0	0	0	0	ENSRNOG00000055140	NA	16	79492054	79501776	+	protein_coding	NA	NA	NA	NA	NA	NA
AABR07026797.1	103	85	99	97	84	84	23	12	32	ENSRNOG00000018554	NA	17	733746	735096	+	protein_coding	NA	NA	NA	NA	NA	NA
AABR07026803.1	0	0	0	0	0	0	0	0	0	ENSRNOG00000059042	120097972	17	509789	509872	-	snoRNA	NA	NA	NA	NA	NA	NA
AABR07026805.1	5	7	2	5	9	3	5	1	2	ENSRNOG00000027309	290952	17	267508	454102	+	protein_coding	GO:0007155|cell adhesion;	GO:0016020|membrane;GO:0030424|axon;GO:0043204|perikaryon;	NA	NA	NA	NA
AABR07026805.2	0	3	0	1	1	3	1	0	2	ENSRNOG00000040101	502110	17	488817	489089	-	protein_coding	GO:0042127|regulation of cell population proliferation;	NA	NA	NA	NA	NA
AABR07026929.1	0	5	1	3	2	4	4	4	2	ENSRNOG00000042026	NA	17	4933138	4933917	+	protein_coding	NA	NA	NA	NA	NA	NA
AABR07026997.1	0	0	0	1	0	0	0	0	0	ENSRNOG00000011955	314652	7	14535632	14535973	+	protein_coding	GO:0006414|translational elongation;	NA	NA	K02942|large subunit ribosomal protein LP1;K02942|large subunit ribosomal protein LP1;	rno03010;rno05171;	Ribosome;Coronavirus disease - COVID-19;
AABR07026997.2	0	0	0	0	0	0	0	0	0	ENSRNOG00000056514	120097998	17	8445020	8445143	-	snoRNA	NA	NA	NA	NA	NA	NA
AABR07027015.1	13	8	10	12	12	8	10	12	19	ENSRNOG00000033625	108348509	17	10477880	10478212	-	protein_coding	NA	NA	NA	NA	NA	NA
AABR07027051.1	0	0	0	0	0	0	0	0	0	ENSRNOG00000060985	120097990	17	12216183	12216312	-	snoRNA	NA	NA	NA	NA	NA	NA
AABR07027069.1	0	0	0	0	0	0	0	0	0	ENSRNOG00000058895	120098002	17	12868850	12868949	+	snoRNA	NA	NA	NA	NA	NA	NA
AABR07027098.1	0	0	0	0	0	0	0	0	0	ENSRNOG00000048372	100910585	17	14657797	14663172	+	protein_coding	NA	GO:0016020|membrane;	NA	NA	NA	NA
AABR07027128.1	0	0	0	0	0	0	0	0	0	ENSRNOG00000061064	102548031	17	14466263	14471894	+	protein_coding	NA	GO:0016020|membrane;	NA	NA	NA	NA
AABR07027141.1	0	0	0	0	0	0	0	0	0	ENSRNOG00000061738	NA	17	14740622	14746170	+	protein_coding	NA	NA	NA	NA	NA	NA
AABR07027150.1	0	0	0	1	0	0	0	0	0	ENSRNOG00000055463	120097987	17	16082157	16082288	+	snoRNA	NA	NA	NA	NA	NA	NA
AABR07027258.1	3	0	3	2	1	1	3	1	3	ENSRNOG00000023831	364688	17	23592899	23648306	-	protein_coding	GO:0060548|negative regulation of cell death;	GO:0000779|condensed chromosome, centromeric region;GO:0000800|lateral element;GO:0001674|female germ cell nucleus;GO:0005634|nucleus;GO:0005654|nucleoplasm;	NA	NA	NA	NA
AABR07027267.1	0	0	0	0	0	0	0	0	0	ENSRNOG00000060618	NA	3	138289633	138313798	+	protein_coding	NA	NA	NA	NA	NA	NA
AABR07027309.1	5	5	5	6	6	9	13	2	9	ENSRNOG00000060680	102547830	17	21518279	21530944	-	lncRNA	NA	NA	NA	NA	NA	NA
AABR07027322.1	509	437	448	419	376	345	759	549	759	ENSRNOG00000030442	NA	17	23985665	23986275	-	pseudogene	NA	NA	NA	NA	NA	NA
AABR07027339.1	0	0	0	0	0	0	0	0	0	ENSRNOG00000059019	NA	17	24506919	24515268	+	protein_coding	NA	NA	NA	NA	NA	NA
AABR07027342.1	0	0	0	0	0	0	0	0	0	ENSRNOG00000024499	690971	17	24539047	24811079	+	protein_coding	NA	GO:0005737|cytoplasm;GO:0005783|endoplasmic reticulum;GO:0005829|cytosol;GO:0015630|microtubule cytoskeleton;GO:0016020|membrane;GO:0048471|perinuclear region of cytoplasm;	NA	NA	NA	NA
AABR07027368.1	0	0	0	0	0	0	0	0	0	ENSRNOG00000047910	364694	17	26135927	26136235	+	protein_coding	NA	NA	GO:0046982|protein heterodimerization activity;	NA	NA	NA
AABR07027409.1	0	0	0	0	0	0	0	0	0	ENSRNOG00000057046	120097996	17	28201501	28201626	-	snoRNA	NA	NA	NA	NA	NA	NA
AABR07027419.1	0	0	0	0	0	0	0	0	0	ENSRNOG00000061790	120097993	17	29562177	29562309	+	snoRNA	NA	NA	NA	NA	NA	NA
AABR07027501.2	0	0	0	0	0	0	0	0	0	ENSRNOG00000061758	120098004	17	33121920	33122044	-	snoRNA	NA	NA	NA	NA	NA	NA
AABR07027568.1	0	0	0	0	0	0	0	0	0	ENSRNOG00000054406	120097975	17	35299206	35299336	+	snoRNA	NA	NA	NA	NA	NA	NA
AABR07027744.1	0	0	0	0	0	0	0	0	0	ENSRNOG00000057268	120098001	17	40774693	40774802	+	snoRNA	NA	NA	NA	NA	NA	NA
AABR07027750.1	0	0	0	0	0	0	0	0	0	ENSRNOG00000042692	171080	17	41222049	41253304	-	protein_coding	GO:0006814|sodium ion transport;GO:0006820|monoatomic anion transport;GO:0015747|urate transport;GO:0035435|phosphate ion transmembrane transport;GO:0035725|sodium ion transmembrane transport;GO:0046415|urate metabolic process;	GO:0016020|membrane;GO:0016324|apical plasma membrane;	GO:0005436|sodium:phosphate symporter activity;GO:0015114|phosphate ion transmembrane transporter activity;GO:0022857|transmembrane transporter activity;	NA	NA	NA
AABR07027753.1	0	0	0	0	0	0	0	0	0	ENSRNOG00000046334	NA	17	41555660	41555973	+	pseudogene	NA	NA	NA	NA	NA	NA
AABR07027758.1	0	1	0	0	0	0	0	0	0	ENSRNOG00000053627	120097977	17	41685912	41686040	-	snoRNA	NA	NA	NA	NA	NA	NA
AABR07027810.4	0	0	0	0	0	0	0	0	0	ENSRNOG00000053995	NA	17	42655552	42655676	+	miRNA	NA	NA	NA	NA	NA	NA
AABR07027819.1	0	0	0	0	0	0	0	0	0	ENSRNOG00000031902	NA	17	43254214	43255377	-	protein_coding	NA	NA	NA	NA	NA	NA
AABR07027847.1	0	0	0	0	0	0	0	0	0	ENSRNOG00000053933	120098000	17	44109505	44109636	-	snoRNA	NA	NA	NA	NA	NA	NA
AABR07027854.1	1	1	1	0	1	1	0	1	2	ENSRNOG00000057759	NA	17	44254375	44255487	+	pseudogene	NA	NA	NA	NA	NA	NA
AABR07027857.1	0	0	0	0	0	0	0	0	0	ENSRNOG00000051427	120097999	17	44623279	44623407	-	snoRNA	NA	NA	NA	NA	NA	NA
AABR07027866.1	0	0	0	0	0	0	0	0	0	ENSRNOG00000053140	NA	17	45203174	45204074	+	pseudogene	NA	NA	NA	NA	NA	NA
AABR07027872.1	0	0	0	0	0	0	0	0	0	ENSRNOG00000055197	NA	17	45680483	45686011	-	protein_coding	NA	NA	NA	NA	NA	NA
AABR07027878.1	0	0	0	0	0	0	0	0	0	ENSRNOG00000052387	NA	17	41890805	41892473	-	protein_coding	NA	NA	NA	NA	NA	NA
AABR07027906.1	0	0	0	0	0	0	0	0	0	ENSRNOG00000051833	120098006	17	46001609	46001738	-	snoRNA	NA	NA	NA	NA	NA	NA
AABR07027925.1	0	0	0	0	0	0	0	0	0	ENSRNOG00000013237	681092	17	46472181	46921039	+	protein_coding	NA	NA	NA	NA	NA	NA
AABR07027925.2	26	21	21	15	24	14	8	4	12	ENSRNOG00000030925	NA	17	46929662	46930375	+	protein_coding	NA	NA	NA	NA	NA	NA
AABR07028013.1	0	0	0	0	0	0	0	0	0	ENSRNOG00000059319	100362197	17	50371039	50371494	+	processed_pseudogene	NA	NA	NA	NA	NA	NA
AABR07028027.1	311	303	332	292	275	281	180	167	218	ENSRNOG00000021292	100912102	17	50836367	50838072	+	protein_coding	NA	GO:0005634|nucleus;GO:0016020|membrane;	NA	NA	NA	NA
AABR07028137.2	0	0	0	0	0	0	0	0	0	ENSRNOG00000056440	100911936	17	61569189	61578105	-	lncRNA	NA	NA	NA	NA	NA	NA
AABR07028185.1	0	0	0	0	0	0	0	0	0	ENSRNOG00000042036	NA	17	62741937	62743063	+	pseudogene	NA	NA	NA	NA	NA	NA
AABR07028218.1	0	0	0	0	0	0	0	0	0	ENSRNOG00000058961	120097995	17	56216680	56216814	+	snoRNA	NA	NA	NA	NA	NA	NA
AABR07028227.1	0	0	0	0	0	0	0	0	0	ENSRNOG00000061305	120098009	17	55820358	55820490	+	scaRNA	NA	NA	NA	NA	NA	NA
AABR07028237.1	0	0	0	0	0	0	0	0	0	ENSRNOG00000018685	NA	17	56372349	56372903	+	protein_coding	NA	NA	NA	NA	NA	NA
AABR07028262.1	0	0	0	0	0	0	0	0	0	ENSRNOG00000057362	103690071	17	57616957	57776082	-	protein_coding	NA	NA	NA	NA	NA	NA
AABR07028349.1	10	11	18	11	10	18	6	10	17	ENSRNOG00000021584	NA	17	58274519	58277290	-	protein_coding	NA	NA	NA	NA	NA	NA
AABR07028352.1	531	468	524	416	471	410	211	345	595	ENSRNOG00000018113	NA	17	57986511	57989997	-	protein_coding	NA	NA	NA	NA	NA	NA
AABR07028356.1	0	0	0	0	0	0	0	0	0	ENSRNOG00000056515	NA	17	57892200	57900929	-	protein_coding	NA	NA	NA	NA	NA	NA
AABR07028394.1	0	0	0	0	0	0	0	0	0	ENSRNOG00000053558	120098005	17	64670246	64670368	+	snoRNA	NA	NA	NA	NA	NA	NA
AABR07028488.1	421	361	450	424	380	358	391	361	524	ENSRNOG00000049614	684327	17	68252128	68352207	-	protein_coding	GO:0010466|negative regulation of peptidase activity;GO:0030212|hyaluronan metabolic process;	GO:0005576|extracellular region;	GO:0004867|serine-type endopeptidase inhibitor activity;	NA	NA	NA
AABR07028525.1	0	0	0	0	0	0	0	0	0	ENSRNOG00000059156	120097994	17	69680517	69680648	-	snoRNA	NA	NA	NA	NA	NA	NA
AABR07028615.2	0	0	0	0	0	0	0	0	0	ENSRNOG00000051034	100362620	17	24271431	24271670	+	protein_coding	GO:0051301|cell division;	NA	GO:0016538|cyclin-dependent protein serine/threonine kinase regulator activity;	NA	NA	NA
AABR07028668.1	0	0	0	0	0	0	0	0	0	ENSRNOG00000060417	108348617	17	75638449	75638655	-	protein_coding	NA	NA	NA	NA	NA	NA
AABR07028717.1	0	0	0	0	0	0	0	0	0	ENSRNOG00000059985	120097989	17	78453837	78453970	-	snoRNA	NA	NA	NA	NA	NA	NA
AABR07028748.1	0	0	0	0	0	0	0	0	0	ENSRNOG00000030638	NA	17	80588823	80589694	-	protein_coding	NA	NA	NA	NA	NA	NA
AABR07028769.1	902	779	916	812	772	778	998	890	1053	ENSRNOG00000016670	116723	17	81496670	81668029	-	protein_coding	GO:0010506|regulation of autophagy;GO:0016310|phosphorylation;GO:0035855|megakaryocyte development;GO:0046627|negative regulation of insulin receptor signaling pathway;GO:0061909|autophagosome-lysosome fusion;GO:0090119|vesicle-mediated cholesterol transport;GO:0090217|negative regulation of 1-phosphatidylinositol-4-phosphate 5-kinase activity;GO:1902635|1-phosphatidyl-1D-myo-inositol 4,5-bisphos…	GO:0001750|photoreceptor outer segment;GO:0001917|photoreceptor inner segment;GO:0005634|nucleus;GO:0005764|lysosome;GO:0005776|autophagosome;GO:0005829|cytosol;GO:0005886|plasma membrane;	GO:0005524|ATP binding;GO:0016308|1-phosphatidylinositol-4-phosphate 5-kinase activity;GO:0016309|1-phosphatidylinositol-5-phosphate 4-kinase activity;GO:0042803|protein homodimerization activity;	K00920|1-phosphatidylinositol-5-phosphate 4-kinase [EC:2.7.1.149];K00920|1-phosphatidylinositol-5-phosphate 4-kinase [EC:2.7.1.149];K00920|1-phosphatidylinositol-5-phosphate 4-kinase [EC:2.7.1.149];K00920|1-phosphatidylinositol-5-phosphate 4-kinase [EC:2.7.1.149];	rno00562;rno01100;rno04070;rno04810;	Inositol phosphate metabolism;Metabolic pathways;Phosphatidylinositol signaling system;Regulation of actin cytoskeleton;
AABR07028779.1	0	0	0	0	0	1	0	0	0	ENSRNOG00000016710	100912261	17	81865770	81866459	-	protein_coding	NA	NA	NA	NA	NA	NA
AABR07028784.1	0	0	0	0	0	0	0	0	0	ENSRNOG00000055730	NA	17	82062484	82066157	-	lncRNA	NA	NA	NA	NA	NA	NA
AABR07028785.1	2	1	1	1	2	2	0	0	0	ENSRNOG00000021898	681241	17	82071838	82174353	-	protein_coding	NA	NA	NA	NA	NA	NA
AABR07028805.1	2	1	1	2	1	2	0	2	1	ENSRNOG00000040024	NA	17	2865527	2867486	-	protein_coding	NA	NA	NA	NA	NA	NA
AABR07028859.1	0	0	0	0	0	0	0	0	0	ENSRNOG00000009861	108348601	17	84754643	84755185	-	protein_coding	GO:0006412|translation;	NA	NA	NA	NA	NA
AABR07028872.1	0	0	0	0	0	0	0	0	0	ENSRNOG00000028913	120093110	17	85668333	85850723	-	protein_coding	GO:0006468|protein phosphorylation;	NA	GO:0005524|ATP binding;	NA	NA	NA
AABR07028874.1	0	0	0	0	0	0	0	0	0	ENSRNOG00000051469	NA	17	85521227	85594957	+	lncRNA	NA	NA	NA	NA	NA	NA
AABR07028902.1	820	783	878	810	777	714	646	537	653	ENSRNOG00000058094	85419	17	86241384	86443480	+	protein_coding	GO:0002446|neutrophil mediated immunity;GO:0002456|T cell mediated immunity;GO:0006644|phospholipid metabolic process;GO:0007017|microtubule-based process;GO:0007040|lysosome organization;GO:0007596|blood coagulation;GO:0009410|response to xenobiotic stimulus;GO:0030595|leukocyte chemotaxis;GO:0032438|melanosome organization;GO:0032510|endosome to lysosome transport via multivesicular body sortin…	GO:0005575|cellular_component;GO:0005829|cytosol;GO:0015630|microtubule cytoskeleton;	GO:0003674|molecular_function;	NA	NA	NA
AABR07028945.1	0	0	0	0	0	0	0	0	0	ENSRNOG00000052005	NA	3	3310940	3347929	+	lncRNA	NA	NA	NA	NA	NA	NA
AABR07028997.1	0	0	0	0	1	0	0	1	0	ENSRNOG00000057978	NA	10	2205337	2209227	-	protein_coding	NA	NA	NA	NA	NA	NA
AABR07029006.1	1	0	0	0	0	0	0	0	1	ENSRNOG00000032482	120095010	10	2642638	2643075	-	protein_coding	GO:0006412|translation;	NA	NA	NA	NA	NA
AABR07029195.1	8788	7617	8068	7907	7765	7078	10389	8518	13070	ENSRNOG00000003401	NA	10	63282139	63283277	-	protein_coding	NA	NA	NA	NA	NA	NA
AABR07029197.1	0	0	0	0	0	0	0	0	0	ENSRNOG00000053313	120095421	10	12640356	12640491	-	snoRNA	NA	NA	NA	NA	NA	NA
AABR07029262.1	1	0	0	0	2	0	1	0	0	ENSRNOG00000029706	NA	10	18291363	18292163	+	protein_coding	NA	NA	NA	NA	NA	NA
AABR07029269.1	0	0	0	0	0	0	0	0	0	ENSRNOG00000032329	100361460	10	19003131	19022139	+	protein_coding	NA	NA	NA	NA	NA	NA
AABR07029272.1	1	0	0	0	0	2	1	0	0	ENSRNOG00000006932	360509	10	18827239	19244808	-	protein_coding	GO:0001766|membrane raft polarization;GO:0001768|establishment of T cell polarity;GO:0001771|immunological synapse formation;GO:0002277|myeloid dendritic cell activation involved in immune response;GO:0006935|chemotaxis;GO:0007010|cytoskeleton organization;GO:0007264|small GTPase mediated signal transduction;GO:0030036|actin cytoskeleton organization;GO:0042098|T cell proliferation;GO:0042110|T c…	GO:0005737|cytoplasm;	GO:0005085|guanyl-nucleotide exchange factor activity;GO:0005096|GTPase activator activity;GO:0042608|T cell receptor binding;	K12367|dedicator of cytokinesis protein 2;	rno04062;	Chemokine signaling pathway;
AABR07029275.1	0	0	0	0	0	0	0	0	0	ENSRNOG00000057969	120095454	10	19299705	19299826	+	snoRNA	NA	NA	NA	NA	NA	NA
AABR07029275.2	0	0	0	0	0	0	0	0	0	ENSRNOG00000059399	120095444	10	19301212	19301339	-	snoRNA	NA	NA	NA	NA	NA	NA
AABR07029424.1	0	0	0	0	0	0	0	0	0	ENSRNOG00000055125	120095455	10	27700252	27700330	+	snoRNA	NA	NA	NA	NA	NA	NA
AABR07029442.1	0	0	0	0	0	0	0	0	0	ENSRNOG00000060944	120095473	10	27777322	27777469	+	snoRNA	NA	NA	NA	NA	NA	NA
AABR07029457.1	0	0	0	0	0	0	0	0	0	ENSRNOG00000042335	689641	10	28111833	28112060	+	processed_pseudogene	NA	NA	NA	NA	NA	NA
AABR07029470.2	0	0	0	0	0	0	0	0	0	ENSRNOG00000058024	501686	10	28663974	28664273	+	protein_coding	GO:1902600|proton transmembrane transport;	NA	GO:0046961|proton-transporting ATPase activity, rotational mechanism;	NA	NA	NA
AABR07029557.1	0	0	0	0	0	0	0	0	0	ENSRNOG00000054619	120095453	10	33060160	33060278	+	snoRNA	NA	NA	NA	NA	NA	NA
AABR07029559.1	0	0	0	0	0	0	0	0	0	ENSRNOG00000052567	NA	17	78276826	78283880	-	protein_coding	NA	NA	NA	NA	NA	NA
AABR07029581.1	550	486	592	473	487	443	987	885	1009	ENSRNOG00000046330	652955	10	34342830	34456062	+	protein_coding	GO:0006511|ubiquitin-dependent protein catabolic process;GO:0006915|apoptotic process;GO:0012501|programmed cell death;GO:0016567|protein ubiquitination;	GO:0005737|cytoplasm;GO:0016020|membrane;	GO:0003674|molecular_function;GO:0004842|ubiquitin-protein transferase activity;GO:0046872|metal ion binding;GO:0061630|ubiquitin protein ligase activity;	NA	NA	NA
AABR07029596.1	6	3	1	4	1	1	11	10	9	ENSRNOG00000046195	64037	10	38133322	38179720	-	protein_coding	GO:0006641|triglyceride metabolic process;GO:0006814|sodium ion transport;GO:0009437|carnitine metabolic process;GO:0015697|quaternary ammonium group transport;GO:0015879|carnitine transport;GO:0042908|xenobiotic transport;GO:0089718|amino acid import across plasma membrane;GO:1902603|carnitine transmembrane transport;	GO:0005739|mitochondrion;GO:0009925|basal plasma membrane;GO:0016020|membrane;GO:0016324|apical plasma membrane;	GO:0005524|ATP binding;GO:0015101|organic cation transmembrane transporter activity;GO:0015171|amino acid transmembrane transporter activity;GO:0015226|carnitine transmembrane transporter activity;GO:0015293|symporter activity;GO:0015651|quaternary ammonium group transmembrane transporter activity;GO:0030165|PDZ domain binding;	K08202|MFS transporter, OCT family, solute carrier family 22 (organic cation transporter), member 4/5;	rno05231;	Choline metabolism in cancer;
AABR07029605.1	900	761	955	882	863	891	1796	1705	1848	ENSRNOG00000009104	100362347	10	38567729	38650824	+	protein_coding	GO:0000122|negative regulation of transcription by RNA polymerase II;GO:0001783|B cell apoptotic process;GO:0001932|regulation of protein phosphorylation;GO:0001934|positive regulation of protein phosphorylation;GO:0002327|immature B cell differentiation;GO:0002904|positive regulation of B cell apoptotic process;GO:0008285|negative regulation of cell population proliferation;GO:0009267|cellular r…	GO:0005737|cytoplasm;GO:0005765|lysosomal membrane;GO:0005829|cytosol;	GO:0005085|guanyl-nucleotide exchange factor activity;GO:0019899|enzyme binding;GO:0042030|ATPase inhibitor activity;GO:0051087|chaperone binding;	K20400|folliculin-interacting protein 1;	rno04150;	mTOR signaling pathway;
AABR07029613.1	13	8	7	6	4	5	5	3	3	ENSRNOG00000038478	497907	10	39768658	39769293	-	protein_coding	GO:0006281|DNA repair;GO:0006310|DNA recombination;GO:0006914|autophagy;GO:0006935|chemotaxis;GO:0006954|inflammatory response;GO:0008150|biological_process;GO:0031347|regulation of defense response;GO:0045087|innate immune response;	GO:0005575|cellular_component;GO:0005576|extracellular region;GO:0005634|nucleus;GO:0005694|chromosome;GO:0005793|endoplasmic reticulum-Golgi intermediate compartment;GO:0005886|plasma membrane;	GO:0003674|molecular_function;	K10802|high mobility group protein B1;K10802|high mobility group protein B1;K10802|high mobility group protein B1;K10802|high mobility group protein B1;	rno03410;rno04140;rno04217;rno04613;	Base excision repair;Autophagy - animal;Necroptosis;Neutrophil extracellular trap formation;
AABR07029613.2	0	0	0	0	0	0	0	0	0	ENSRNOG00000051730	120093045	10	39823575	39823689	+	snoRNA	NA	NA	NA	NA	NA	NA
AABR07029664.1	0	0	0	0	0	0	0	0	0	ENSRNOG00000060046	120095409	10	42393599	42393734	+	snoRNA	NA	NA	NA	NA	NA	NA
AABR07029675.1	0	0	0	0	0	0	0	0	0	ENSRNOG00000001512	287338	10	43381605	43382678	-	protein_coding	GO:0006096|glycolytic process;	NA	GO:0000287|magnesium ion binding;	NA	NA	NA
AABR07029732.1	0	0	0	0	0	0	0	0	0	ENSRNOG00000054498	NA	10	46868248	46869060	+	protein_coding	NA	NA	NA	NA	NA	NA
AABR07029741.1	0	0	0	0	0	0	0	0	0	ENSRNOG00000053082	120095429	10	47272113	47272242	+	snoRNA	NA	NA	NA	NA	NA	NA
AABR07029741.3	3	6	4	4	5	0	0	0	2	ENSRNOG00000055994	NA	5	57319613	57319879	-	protein_coding	NA	NA	NA	NA	NA	NA
AABR07029742.2	0	1	0	0	0	0	0	1	0	ENSRNOG00000046598	120095326	10	47260023	47260175	+	protein_coding	GO:0007015|actin filament organization;	GO:0005856|cytoskeleton;	NA	NA	NA	NA
AABR07029768.1	0	0	0	0	2	0	0	2	0	ENSRNOG00000052088	102552952	10	47616479	47625390	-	lncRNA	NA	NA	NA	NA	NA	NA
AABR07029768.2	0	0	0	0	0	0	0	0	0	ENSRNOG00000055459	120095116	10	47588417	47591061	-	lncRNA	NA	NA	NA	NA	NA	NA
AABR07029847.1	2	0	0	0	0	0	0	0	0	ENSRNOG00000004092	287415	10	53338210	53343981	-	protein_coding	NA	NA	NA	NA	NA	NA
AABR07029863.4	0	0	0	0	0	0	0	0	0	ENSRNOG00000061193	NA	10	54674424	54674912	+	protein_coding	NA	NA	NA	NA	NA	NA
AABR07029890.1	0	0	0	0	0	1	0	0	0	ENSRNOG00000048125	691998	10	55843001	55912774	-	protein_coding	GO:0006919|activation of cysteine-type endopeptidase activity involved in apoptotic process;GO:0006954|inflammatory response;GO:0010804|negative regulation of tumor necrosis factor-mediated signaling pathway;GO:0012501|programmed cell death;GO:0031665|negative regulation of lipopolysaccharide-mediated signaling pathway;GO:0032088|negative regulation of NF-kappaB transcription factor activity;GO:0…	GO:0005634|nucleus;GO:0005654|nucleoplasm;GO:0005737|cytoplasm;GO:0032991|protein-containing complex;GO:0061702|inflammasome complex;GO:0072559|NLRP3 inflammasome complex;GO:0140634|CARD8 inflammasome complex;	GO:0004175|endopeptidase activity;GO:0005524|ATP binding;GO:0008233|peptidase activity;GO:0008656|cysteine-type endopeptidase activator activity involved in apoptotic process;GO:0032089|NACHT domain binding;GO:0038187|pattern recognition receptor activity;GO:0042803|protein homodimerization activity;GO:0043621|protein self-association;GO:0050700|CARD domain binding;GO:0140608|cysteine-type endope…	K12798|NACHT, LRR and PYD domains-containing protein 1;	rno04621;	NOD-like receptor signaling pathway;
AABR07029955.1	2	1	0	0	0	0	0	0	0	ENSRNOG00000031525	NA	10	18323566	18324058	+	pseudogene	NA	NA	NA	NA	NA	NA
AABR07030019.1	25	21	23	17	26	25	10	13	16	ENSRNOG00000050113	NA	10	62308013	62308152	+	protein_coding	NA	NA	NA	NA	NA	NA
AABR07030085.1	0	0	0	0	0	0	0	0	0	ENSRNOG00000023182	363650	10	64124848	64125240	+	protein_coding	GO:0006412|translation;	GO:0005840|ribosome;GO:1990904|ribonucleoprotein complex;	GO:0003735|structural constituent of ribosome;	NA	NA	NA
AABR07030108.2	0	0	0	0	0	0	0	0	0	ENSRNOG00000056543	120095424	10	65132908	65133055	+	snoRNA	NA	NA	NA	NA	NA	NA
AABR07030122.1	0	0	0	0	0	0	0	0	0	ENSRNOG00000030217	108352207	10	66210276	66210608	+	protein_coding	NA	NA	NA	NA	NA	NA
AABR07030143.1	0	0	0	0	0	0	0	0	0	ENSRNOG00000057390	NA	10	68593837	68594709	+	protein_coding	NA	NA	NA	NA	NA	NA
AABR07030147.1	0	0	0	0	0	0	0	0	0	ENSRNOG00000051234	NA	10	68732367	68735857	-	lncRNA	NA	NA	NA	NA	NA	NA
AABR07030156.1	0	0	0	0	0	0	0	0	0	ENSRNOG00000046186	NA	10	69802864	69803105	-	pseudogene	NA	NA	NA	NA	NA	NA
AABR07030162.1	160	173	206	156	184	188	189	213	300	ENSRNOG00000031560	NA	10	70110746	70111303	-	protein_coding	NA	NA	NA	NA	NA	NA
AABR07030218.1	0	0	0	0	0	0	0	0	0	ENSRNOG00000056866	120095466	10	73910640	73910741	-	snRNA	NA	NA	NA	NA	NA	NA
AABR07030259.1	0	0	0	0	0	0	0	0	0	ENSRNOG00000052485	120095456	10	75608134	75608254	-	snoRNA	NA	NA	NA	NA	NA	NA
AABR07030335.1	0	0	0	0	0	0	0	0	0	ENSRNOG00000045669	120095278	10	79231211	79235324	+	protein_coding	NA	NA	NA	NA	NA	NA
AABR07030375.1	0	0	0	0	1	0	1	1	0	ENSRNOG00000022375	303471	10	80274041	80274496	-	protein_coding	GO:0031110|regulation of microtubule polymerization or depolymerization;	NA	NA	K04381|stathmin 1;K04381|stathmin 1;	rno04010;rno05206;	MAPK signaling pathway;MicroRNAs in cancer;
AABR07030377.1	0	0	0	0	0	0	0	0	0	ENSRNOG00000059688	120095411	10	80380675	80380818	+	snoRNA	NA	NA	NA	NA	NA	NA
AABR07030425.1	0	1	0	1	0	2	0	1	0	ENSRNOG00000056057	NA	10	82181224	82181547	+	protein_coding	NA	NA	NA	NA	NA	NA
AABR07030435.1	7	1	1	6	4	4	5	4	9	ENSRNOG00000055533	NA	10	82484271	82486053	-	pseudogene	NA	NA	NA	NA	NA	NA
AABR07030464.1	0	0	0	0	0	0	0	0	0	ENSRNOG00000012973	NA	10	84732285	84740603	-	protein_coding	NA	NA	NA	NA	NA	NA
AABR07030473.2	0	0	1	0	1	0	2	3	1	ENSRNOG00000060666	120095415	10	85566258	85566369	+	snoRNA	NA	NA	NA	NA	NA	NA
AABR07030494.1	64	55	50	38	49	32	32	38	58	ENSRNOG00000049929	NA	10	87574943	87575317	-	protein_coding	NA	NA	NA	NA	NA	NA
AABR07030524.1	4	3	6	5	7	7	3	8	6	ENSRNOG00000028427	NA	10	88602453	88602827	+	protein_coding	NA	NA	NA	NA	NA	NA
AABR07030528.1	0	0	0	1	0	0	0	0	2	ENSRNOG00000055961	120095423	10	89266990	89267117	-	snoRNA	NA	NA	NA	NA	NA	NA
AABR07030544.1	111	113	104	86	91	86	234	183	183	ENSRNOG00000029597	NA	10	89564967	89572321	-	protein_coding	NA	NA	NA	NA	NA	NA
AABR07030599.1	0	0	0	0	0	0	0	0	0	ENSRNOG00000059819	120095432	10	92091155	92091288	+	snRNA	NA	NA	NA	NA	NA	NA
AABR07030605.1	0	0	0	0	0	0	0	0	1	ENSRNOG00000055516	120095417	10	92188657	92188789	-	snoRNA	NA	NA	NA	NA	NA	NA
AABR07030607.1	0	0	0	0	0	0	0	0	0	ENSRNOG00000053545	120095410	10	92314673	92314811	+	snoRNA	NA	NA	NA	NA	NA	NA
AABR07030630.1	3	1	2	1	3	2	0	1	0	ENSRNOG00000052124	NA	10	93364092	93364568	+	protein_coding	NA	NA	NA	NA	NA	NA
AABR07030647.1	0	0	0	0	0	0	0	0	0	ENSRNOG00000033613	287782	10	94192152	94192520	-	protein_coding	GO:0007165|signal transduction;	NA	NA	NA	NA	NA
AABR07030729.1	0	0	0	0	0	0	1	0	0	ENSRNOG00000030224	NA	10	98813794	98814795	-	protein_coding	NA	NA	NA	NA	NA	NA
AABR07030762.1	0	0	0	0	0	0	0	0	0	ENSRNOG00000061486	120095402	10	99772764	99772893	-	snoRNA	NA	NA	NA	NA	NA	NA
AABR07030771.1	0	0	0	0	0	0	0	0	0	ENSRNOG00000042251	100361633	10	100083490	100115821	-	protein_coding	GO:0032675|regulation of interleukin-6 production;GO:0032680|regulation of tumor necrosis factor production;GO:0046718|viral entry into host cell;	GO:0005886|plasma membrane;	GO:0001618|virus receptor activity;	NA	NA	NA
AABR07030773.1	0	0	0	0	0	0	0	0	0	ENSRNOG00000050974	303666	10	100253624	100258323	-	protein_coding	GO:0001819|positive regulation of cytokine production;	GO:0005886|plasma membrane;	NA	NA	NA	NA
AABR07030781.1	4	7	0	2	4	4	6	1	0	ENSRNOG00000056183	120093044	10	100770794	100770925	-	snoRNA	NA	NA	NA	NA	NA	NA
AABR07030791.1	3	0	0	0	0	0	0	0	0	ENSRNOG00000052940	501740	10	100056504	100078190	-	protein_coding	NA	GO:0016020|membrane;	NA	NA	NA	NA
AABR07030793.1	0	0	0	0	0	0	0	0	0	ENSRNOG00000046121	100909671	10	100121682	100126092	-	protein_coding	NA	GO:0005886|plasma membrane;	GO:0004888|transmembrane signaling receptor activity;	NA	NA	NA
AABR07030796.1	0	0	0	0	0	0	0	0	0	ENSRNOG00000059563	NA	10	100005230	100009840	-	pseudogene	NA	NA	NA	NA	NA	NA
AABR07030823.1	0	0	0	0	0	0	1	0	0	ENSRNOG00000046001	116557	10	101566304	101570237	-	protein_coding	GO:0000122|negative regulation of transcription by RNA polymerase II;GO:0002508|central tolerance induction;GO:0002635|negative regulation of germinal center formation;GO:0002897|positive regulation of central B cell tolerance induction;GO:0002924|negative regulation of humoral immune response mediated by circulating immunoglobulin;GO:0006355|regulation of DNA-templated transcription;GO:0006959|h…	GO:0005575|cellular_component;GO:0005634|nucleus;	GO:0000976|transcription cis-regulatory region binding;GO:0000978|RNA polymerase II cis-regulatory region sequence-specific DNA binding;GO:0000981|DNA-binding transcription factor activity, RNA polymerase II-specific;GO:0001228|DNA-binding transcription activator activity, RNA polymerase II-specific;GO:0003674|molecular_function;GO:0003700|DNA-binding transcription factor activity;GO:0043565|sequ…	NA	NA	NA
AABR07030861.1	341	282	279	320	285	266	428	328	455	ENSRNOG00000053469	688280	10	102971229	102998960	-	protein_coding	GO:0034220|monoatomic ion transmembrane transport;	GO:0005737|cytoplasm;GO:0005783|endoplasmic reticulum;GO:0005794|Golgi apparatus;GO:0005886|plasma membrane;GO:0031965|nuclear membrane;	NA	NA	NA	NA
AABR07030911.1	35	22	28	18	17	19	21	17	21	ENSRNOG00000032442	NA	10	104855233	104855685	-	protein_coding	NA	NA	NA	NA	NA	NA
AABR07030946.1	0	0	0	0	0	0	0	0	0	ENSRNOG00000054660	120095434	10	107103489	107103632	+	snoRNA	NA	NA	NA	NA	NA	NA
AABR07031138.1	0	0	0	0	0	0	0	0	0	ENSRNOG00000030649	120098305	18	1257666	1258121	-	protein_coding	GO:0006351|DNA-templated transcription;	GO:0005665|RNA polymerase II, core complex;GO:0005666|RNA polymerase III complex;GO:0005736|RNA polymerase I complex;	NA	NA	NA	NA
AABR07031154.1	6	6	3	0	2	6	1	0	3	ENSRNOG00000052723	120098390	18	1704945	1705053	-	snoRNA	NA	NA	NA	NA	NA	NA
AABR07031184.1	0	0	0	0	0	0	0	0	0	ENSRNOG00000056510	120098391	18	3292562	3292696	-	snoRNA	NA	NA	NA	NA	NA	NA
AABR07031184.2	0	0	0	0	0	0	0	0	0	ENSRNOG00000056808	NA	18	3379860	3380211	-	pseudogene	NA	NA	NA	NA	NA	NA
AABR07031259.1	0	0	0	0	0	0	0	0	0	ENSRNOG00000055349	120098397	18	6109193	6109323	+	snoRNA	NA	NA	NA	NA	NA	NA
AABR07031278.1	0	0	0	0	0	0	0	0	0	ENSRNOG00000060302	108348751	18	6853266	6865230	-	lncRNA	NA	NA	NA	NA	NA	NA
AABR07031480.1	555	453	564	546	477	485	476	470	572	ENSRNOG00000015645	94196	18	12291590	12315930	+	protein_coding	GO:0000724|double-strand break repair via homologous recombination;GO:0010792|DNA double-strand break processing involved in repair via single-strand annealing;GO:0016055|Wnt signaling pathway;GO:0016567|protein ubiquitination;GO:1990830|cellular response to leukemia inhibitory factor;	GO:0035861|site of double-strand break;	GO:0003697|single-stranded DNA binding;GO:0019901|protein kinase binding;GO:0046872|metal ion binding;GO:0061630|ubiquitin protein ligase activity;	NA	NA	NA
AABR07031491.2	1121	927	1077	1033	973	951	812	885	1245	ENSRNOG00000049681	679221	18	15029041	15168044	+	protein_coding	GO:0031110|regulation of microtubule polymerization or depolymerization;GO:0032014|positive regulation of ARF protein signal transduction;GO:0035372|protein localization to microtubule;GO:0043547|positive regulation of GTPase activity;GO:0051225|spindle assembly;GO:0051301|cell division;GO:0051549|positive regulation of keratinocyte migration;GO:0120183|positive regulation of focal adhesion disas…	GO:0005815|microtubule organizing center;GO:0005881|cytoplasmic microtubule;GO:0005925|focal adhesion;GO:0015630|microtubule cytoskeleton;GO:0035371|microtubule plus-end;GO:0051233|spindle midzone;	GO:0008017|microtubule binding;GO:0019901|protein kinase binding;GO:0042802|identical protein binding;GO:0051010|microtubule plus-end binding;	NA	NA	NA
AABR07031505.1	0	0	1	0	0	0	0	0	1	ENSRNOG00000030439	364828	18	15671460	15671903	+	protein_coding	NA	NA	NA	NA	NA	NA
AABR07031521.1	15	12	22	17	16	20	20	19	25	ENSRNOG00000062247	291729	18	16210531	16212635	+	pseudogene	NA	NA	NA	NA	NA	NA
AABR07031537.1	0	0	0	0	0	0	0	0	0	ENSRNOG00000055852	NA	18	18012265	18048204	-	lncRNA	NA	NA	NA	NA	NA	NA
AABR07031574.1	0	0	0	0	0	0	0	0	0	ENSRNOG00000058823	120098395	18	19827615	19827741	+	snoRNA	NA	NA	NA	NA	NA	NA
AABR07031634.1	0	0	0	0	0	0	0	0	0	ENSRNOG00000058459	120098402	18	22054484	22054597	+	snoRNA	NA	NA	NA	NA	NA	NA
AABR07031666.1	1	0	0	1	0	0	0	1	0	ENSRNOG00000030364	686074	18	23159441	23159812	-	protein_coding	GO:0006412|translation;	NA	NA	NA	NA	NA
AABR07031669.1	0	0	0	0	0	1	0	0	0	ENSRNOG00000056958	120098364	18	23478613	23478747	-	snoRNA	NA	NA	NA	NA	NA	NA
AABR07031674.2	0	1	0	1	0	0	0	1	0	ENSRNOG00000046154	NA	18	24212231	24213306	-	protein_coding	NA	NA	NA	NA	NA	NA
AABR07031674.4	0	0	0	0	0	0	0	0	0	ENSRNOG00000054451	120098387	18	24236325	24236450	-	snoRNA	NA	NA	NA	NA	NA	NA
AABR07031674.5	0	0	0	0	0	0	0	0	0	ENSRNOG00000057432	120098381	18	24250450	24250580	-	snoRNA	NA	NA	NA	NA	NA	NA
AABR07031674.7	0	0	1	0	0	0	0	0	1	ENSRNOG00000061675	102546724	18	24093115	24097007	-	protein_coding	NA	GO:0016020|membrane;	NA	NA	NA	NA
AABR07031691.1	0	0	0	0	0	0	1	1	0	ENSRNOG00000060281	NA	18	26022706	26023633	-	protein_coding	NA	NA	NA	NA	NA	NA
AABR07031703.1	0	0	0	0	0	0	2	6	1	ENSRNOG00000052686	120098406	18	27392339	27392461	-	snRNA	NA	NA	NA	NA	NA	NA
AABR07031724.1	7	4	5	16	9	3	14	10	5	ENSRNOG00000061564	108353164	18	26703780	26728467	-	lncRNA	NA	NA	NA	NA	NA	NA
AABR07031767.1	0	0	0	0	0	0	0	0	0	ENSRNOG00000053112	NA	18	32167004	32167418	+	pseudogene	NA	NA	NA	NA	NA	NA
AABR07031780.1	0	0	0	0	0	0	0	0	0	ENSRNOG00000059289	120093049	18	33045908	33046048	+	snoRNA	NA	NA	NA	NA	NA	NA
AABR07031932.1	0	0	0	0	0	0	0	0	0	ENSRNOG00000061296	120098386	18	38566412	38566541	+	snoRNA	NA	NA	NA	NA	NA	NA
AABR07031937.1	0	0	0	0	0	0	0	0	0	ENSRNOG00000030301	120098318	18	38733041	38733370	-	protein_coding	GO:0022900|electron transport chain;	NA	NA	NA	NA	NA
AABR07031947.1	0	0	0	0	0	0	0	0	0	ENSRNOG00000050666	108348781	18	38866259	38866636	+	protein_coding	NA	NA	NA	NA	NA	NA
AABR07031947.2	0	0	0	0	0	0	0	0	0	ENSRNOG00000060083	120098392	18	38841957	38842096	+	snoRNA	NA	NA	NA	NA	NA	NA
AABR07031963.1	0	1	0	0	3	4	1	5	1	ENSRNOG00000052952	NA	18	39589341	39596429	+	protein_coding	NA	NA	NA	NA	NA	NA
AABR07031972.1	0	0	0	0	0	0	0	0	0	ENSRNOG00000046899	NA	4	127416810	127417723	+	protein_coding	NA	NA	NA	NA	NA	NA
AABR07031979.1	0	0	0	0	0	0	0	0	0	ENSRNOG00000061017	120098362	18	40553246	40553374	-	snoRNA	NA	NA	NA	NA	NA	NA
AABR07031983.1	0	0	0	0	0	0	0	0	0	ENSRNOG00000051817	NA	18	40683424	40685381	-	protein_coding	NA	NA	NA	NA	NA	NA
AABR07032097.1	100	72	77	76	53	72	116	75	151	ENSRNOG00000019744	361327	18	44424616	44632329	+	protein_coding	GO:0045727|positive regulation of translation;GO:0045793|positive regulation of cell size;	NA	NA	NA	NA	NA
AABR07032116.1	0	0	0	0	0	0	0	0	0	ENSRNOG00000057114	120098361	18	45507158	45507287	+	snoRNA	NA	NA	NA	NA	NA	NA
AABR07032148.1	0	0	0	0	0	0	0	0	0	ENSRNOG00000059035	120098369	18	48045895	48046039	+	snoRNA	NA	NA	NA	NA	NA	NA
AABR07032161.1	0	0	0	0	0	0	0	0	0	ENSRNOG00000053295	120098405	18	48838794	48838929	+	snoRNA	NA	NA	NA	NA	NA	NA
AABR07032255.1	13	1	3	8	3	4	3	2	0	ENSRNOG00000028381	NA	18	55094919	55095502	-	pseudogene	NA	NA	NA	NA	NA	NA
AABR07032255.2	0	0	0	0	0	0	0	0	0	ENSRNOG00000031591	NA	18	55095099	55095532	+	pseudogene	NA	NA	NA	NA	NA	NA
AABR07032277.1	0	0	0	0	0	0	0	0	0	ENSRNOG00000050226	NA	18	57532644	57533657	+	protein_coding	NA	NA	NA	NA	NA	NA
AABR07032328.1	0	0	0	0	0	0	0	0	0	ENSRNOG00000061507	120098252	18	59066889	59067170	-	protein_coding	NA	NA	NA	NA	NA	NA
AABR07032348.2	0	0	0	0	0	0	0	0	0	ENSRNOG00000054858	120098399	18	60074532	60074652	-	snoRNA	NA	NA	NA	NA	NA	NA
AABR07032385.1	0	0	0	0	0	0	0	0	0	ENSRNOG00000051715	120098367	18	61424093	61424221	-	snoRNA	NA	NA	NA	NA	NA	NA
AABR07032392.1	6	0	0	4	0	2	1	2	3	ENSRNOG00000048704	NA	18	61627156	61628375	-	protein_coding	NA	NA	NA	NA	NA	NA
AABR07032453.1	1	1	0	0	0	0	0	3	0	ENSRNOG00000038592	NA	18	64451150	64452820	-	protein_coding	NA	NA	NA	NA	NA	NA
AABR07032457.1	0	0	0	0	0	0	0	0	0	ENSRNOG00000015806	NA	18	65092319	65093297	+	protein_coding	NA	NA	NA	NA	NA	NA
AABR07032520.1	0	5	2	0	0	1	2	1	0	ENSRNOG00000024426	361348	18	67450595	67467044	+	protein_coding	NA	GO:0005634|nucleus;GO:0005730|nucleolus;	NA	NA	NA	NA
AABR07032520.2	0	0	0	0	0	0	0	0	0	ENSRNOG00000033808	680512	18	67435134	67435346	+	protein_coding	GO:0006412|translation;	NA	NA	NA	NA	NA
AABR07032520.4	0	0	0	0	0	0	0	0	0	ENSRNOG00000057598	NA	18	67437270	67447910	-	lncRNA	NA	NA	NA	NA	NA	NA
AABR07032525.1	0	0	0	0	0	0	0	0	0	ENSRNOG00000060097	120098365	18	67985702	67985828	+	snoRNA	NA	NA	NA	NA	NA	NA
AABR07032532.1	3	2	0	1	7	0	7	2	0	ENSRNOG00000051481	120098358	18	68344475	68344553	-	scaRNA	NA	NA	NA	NA	NA	NA
AABR07032532.2	0	0	0	0	0	0	0	0	0	ENSRNOG00000061205	120098368	18	68344627	68344767	-	scaRNA	NA	NA	NA	NA	NA	NA
AABR07032623.1	0	0	0	1	0	0	0	0	0	ENSRNOG00000056815	120098380	18	71213119	71213246	+	snoRNA	NA	NA	NA	NA	NA	NA
AABR07032643.1	0	0	0	0	0	0	0	0	0	ENSRNOG00000057621	120098394	18	73033462	73033556	-	snoRNA	NA	NA	NA	NA	NA	NA
AABR07032747.1	0	0	0	0	0	0	0	0	0	ENSRNOG00000055927	120098378	18	75450978	75451108	+	snoRNA	NA	NA	NA	NA	NA	NA
AABR07032821.2	0	0	0	0	0	0	0	0	0	ENSRNOG00000056053	120098401	18	80597486	80597617	+	snoRNA	NA	NA	NA	NA	NA	NA
AABR07032856.1	0	0	0	0	0	0	0	0	1	ENSRNOG00000038211	NA	18	82141202	82142778	-	protein_coding	NA	NA	NA	NA	NA	NA
AABR07032862.1	0	0	0	0	0	0	0	0	0	ENSRNOG00000004661	689166	18	82429900	82430211	-	protein_coding	NA	NA	NA	NA	NA	NA
AABR07033020.1	0	0	0	0	0	0	0	0	0	ENSRNOG00000018224	NA	6	131034180	131034492	-	pseudogene	NA	NA	NA	NA	NA	NA
AABR07033027.1	0	0	0	0	0	0	0	0	0	ENSRNOG00000058687	120095746	11	2803889	2804021	+	snoRNA	NA	NA	NA	NA	NA	NA
AABR07033031.1	0	0	0	0	0	0	0	0	0	ENSRNOG00000060850	120095754	11	2889336	2889466	-	snoRNA	NA	NA	NA	NA	NA	NA
AABR07033045.1	43	55	47	49	63	56	28	21	26	ENSRNOG00000000713	NA	11	3453464	3454395	-	protein_coding	NA	NA	NA	NA	NA	NA
AABR07033047.1	1	2	0	2	3	0	1	0	1	ENSRNOG00000050286	NA	11	3479411	3480543	-	protein_coding	NA	NA	NA	NA	NA	NA
AABR07033090.1	0	0	0	0	0	0	0	0	0	ENSRNOG00000052872	120095765	11	6519178	6519307	-	snoRNA	NA	NA	NA	NA	NA	NA
AABR07033162.1	0	0	0	0	0	0	0	0	0	ENSRNOG00000030674	680375	11	9769601	9770206	+	processed_pseudogene	NA	NA	NA	NA	NA	NA
AABR07033206.1	0	0	0	0	0	0	0	0	0	ENSRNOG00000058239	120095755	11	11756005	11756134	-	snoRNA	NA	NA	NA	NA	NA	NA
AABR07033234.1	0	0	0	0	0	0	0	0	0	ENSRNOG00000052098	120095760	11	13225744	13225871	+	snoRNA	NA	NA	NA	NA	NA	NA
AABR07033236.1	1	1	1	2	2	0	1	0	0	ENSRNOG00000029763	NA	11	13725306	13727228	+	protein_coding	NA	NA	NA	NA	NA	NA
AABR07033271.1	0	0	0	0	0	0	0	0	2	ENSRNOG00000052428	NA	11	14811895	14824950	+	lncRNA	NA	NA	NA	NA	NA	NA
AABR07033287.1	0	0	0	0	0	0	0	0	0	ENSRNOG00000055793	NA	11	16010488	16010757	-	protein_coding	NA	NA	NA	NA	NA	NA
AABR07033303.1	0	0	0	0	0	0	0	0	0	ENSRNOG00000060397	120095757	11	16919776	16919914	+	snoRNA	NA	NA	NA	NA	NA	NA
AABR07033324.1	1	0	0	0	1	1	0	0	1	ENSRNOG00000061099	NA	11	17466782	17468721	-	pseudogene	NA	NA	NA	NA	NA	NA
AABR07033366.1	0	0	0	0	0	0	0	0	0	ENSRNOG00000058294	120095753	11	18878936	18879060	+	snoRNA	NA	NA	NA	NA	NA	NA
AABR07033465.1	2	0	0	0	0	0	0	0	0	ENSRNOG00000055484	108350600	3	68656172	68656363	-	protein_coding	GO:0001522|pseudouridine synthesis;GO:0006364|rRNA processing;	GO:1990904|ribonucleoprotein complex;	GO:0030515|snoRNA binding;	NA	NA	NA
AABR07033537.1	0	0	0	0	0	0	0	0	0	ENSRNOG00000053246	120095764	11	26031442	26031570	+	snoRNA	NA	NA	NA	NA	NA	NA
AABR07033552.1	0	0	0	0	0	0	0	0	0	ENSRNOG00000056286	120095748	11	26752306	26752441	-	snoRNA	NA	NA	NA	NA	NA	NA
AABR07033564.1	0	0	0	0	0	0	0	0	0	ENSRNOG00000056085	120095766	11	27007082	27007199	-	snoRNA	NA	NA	NA	NA	NA	NA
AABR07033570.2	3	1	5	2	5	3	4	3	4	ENSRNOG00000056964	102549158	11	27413195	27414109	+	processed_pseudogene	NA	NA	NA	NA	NA	NA
AABR07033579.1	0	0	0	0	0	0	0	0	0	ENSRNOG00000001566	NA	11	28210161	28210349	-	protein_coding	NA	NA	NA	NA	NA	NA
AABR07033579.3	0	0	0	0	0	0	0	0	0	ENSRNOG00000061897	NA	11	28294843	28295058	+	protein_coding	NA	NA	NA	NA	NA	NA
AABR07033590.1	0	0	0	0	0	0	0	0	0	ENSRNOG00000040050	NA	11	28626801	28627253	-	pseudogene	NA	NA	NA	NA	NA	NA
AABR07033607.1	0	0	0	0	0	0	0	0	0	ENSRNOG00000040039	NA	11	28737757	28738374	-	protein_coding	NA	NA	NA	NA	NA	NA
AABR07033745.1	0	0	0	0	0	0	0	0	0	ENSRNOG00000057895	NA	1	208089033	208089325	-	pseudogene	NA	NA	NA	NA	NA	NA
AABR07033850.1	0	0	0	0	0	0	0	0	0	ENSRNOG00000052206	103693547	11	38354478	38427413	+	lncRNA	NA	NA	NA	NA	NA	NA
AABR07033850.2	0	0	0	0	0	0	0	0	0	ENSRNOG00000058468	120095759	11	38285735	38285868	-	snoRNA	NA	NA	NA	NA	NA	NA
AABR07033851.2	0	0	0	0	0	0	0	0	0	ENSRNOG00000060551	NA	11	38423482	38469926	-	lncRNA	NA	NA	NA	NA	NA	NA
AABR07033867.2	0	0	0	0	0	0	0	0	0	ENSRNOG00000058167	120095777	11	39305075	39305145	-	snoRNA	NA	NA	NA	NA	NA	NA
AABR07033910.1	0	0	0	0	0	0	0	0	0	ENSRNOG00000052102	682042	11	41826337	41827302	+	pseudogene	NA	NA	NA	NA	NA	NA
AABR07033911.1	0	0	0	0	0	0	0	0	0	ENSRNOG00000051434	120095756	11	41843059	41843187	+	snoRNA	NA	NA	NA	NA	NA	NA
AABR07033925.2	0	0	0	0	0	0	0	0	0	ENSRNOG00000056215	120095745	11	42663173	42663305	+	snoRNA	NA	NA	NA	NA	NA	NA
AABR07033979.1	0	0	0	0	2	0	9	7	5	ENSRNOG00000042474	NA	11	43737276	43738259	+	protein_coding	NA	NA	NA	NA	NA	NA
AABR07033987.1	0	1	1	0	0	0	1	0	0	ENSRNOG00000039562	108352369	11	44627300	44627503	+	protein_coding	NA	NA	NA	NA	NA	NA
AABR07033987.2	0	0	0	0	0	0	0	0	0	ENSRNOG00000057748	120095738	11	44632058	44632191	-	snoRNA	NA	NA	NA	NA	NA	NA
AABR07034008.1	0	0	0	0	0	0	0	0	0	ENSRNOG00000001601	NA	2	218037175	218037480	+	protein_coding	NA	NA	NA	NA	NA	NA
AABR07034038.1	0	0	0	0	0	0	0	0	0	ENSRNOG00000055491	120095758	11	46607232	46607355	-	snoRNA	NA	NA	NA	NA	NA	NA
AABR07034038.2	0	0	0	0	0	0	0	0	0	ENSRNOG00000058396	120095767	11	46607667	46607801	+	snoRNA	NA	NA	NA	NA	NA	NA
AABR07034058.1	0	0	0	0	0	0	0	0	0	ENSRNOG00000060476	120095769	11	47781776	47781888	+	snoRNA	NA	NA	NA	NA	NA	NA
AABR07034059.1	0	0	0	0	0	0	0	0	0	ENSRNOG00000051898	120095771	11	47988424	47988552	-	snoRNA	NA	NA	NA	NA	NA	NA
AABR07034125.1	0	0	0	1	1	0	0	1	1	ENSRNOG00000057066	120095735	11	51673727	51673834	+	snoRNA	NA	NA	NA	NA	NA	NA
AABR07034249.1	0	0	0	0	0	0	0	0	0	ENSRNOG00000046846	NA	11	58413335	58413440	+	miRNA	NA	NA	NA	NA	NA	NA
AABR07034252.1	0	0	0	0	0	0	0	0	0	ENSRNOG00000052562	120095737	11	58846528	58846649	+	snoRNA	NA	NA	NA	NA	NA	NA
AABR07034295.1	0	0	0	0	0	0	0	0	0	ENSRNOG00000038987	NA	11	60308480	60361875	+	protein_coding	NA	NA	NA	NA	NA	NA
AABR07034315.1	14	21	17	19	12	3	28	20	27	ENSRNOG00000033603	498085	11	61911204	61911663	+	protein_coding	GO:0006412|translation;	GO:0005791|rough endoplasmic reticulum;	NA	NA	NA	NA
AABR07034328.1	0	0	0	0	0	0	0	0	0	ENSRNOG00000053435	NA	11	60622852	60623727	-	protein_coding	NA	NA	NA	NA	NA	NA
AABR07034362.1	4	11	8	7	4	3	2	3	1	ENSRNOG00000023917	498088	11	64646726	64647337	+	protein_coding	GO:0006913|nucleocytoplasmic transport;	NA	NA	NA	NA	NA
AABR07034438.1	772	683	694	693	665	711	1004	828	1134	ENSRNOG00000046969	NA	11	68398182	68460080	-	protein_coding	NA	NA	NA	NA	NA	NA
AABR07034444.1	0	0	0	0	0	0	0	0	0	ENSRNOG00000053629	120095749	11	68720136	68720265	-	snoRNA	NA	NA	NA	NA	NA	NA
AABR07034445.1	62	70	83	58	54	69	358	289	461	ENSRNOG00000038610	108352348	11	68857943	68858944	-	protein_coding	GO:0006006|glucose metabolic process;GO:0006096|glycolytic process;	NA	GO:0035605|peptidyl-cysteine S-nitrosylase activity;GO:0050661|NADP binding;GO:0051287|NAD binding;	NA	NA	NA
AABR07034574.1	0	0	0	0	0	0	0	0	0	ENSRNOG00000058702	120095763	11	75911941	75912071	-	snoRNA	NA	NA	NA	NA	NA	NA
AABR07034600.1	0	0	0	0	0	0	0	0	0	ENSRNOG00000059060	120095747	11	77497448	77497579	+	snoRNA	NA	NA	NA	NA	NA	NA
AABR07034632.1	0	0	0	0	0	0	0	0	0	ENSRNOG00000038370	25373	11	78117918	78145999	-	protein_coding	GO:0001503|ossification;GO:0006953|acute-phase response;GO:0008584|male gonad development;GO:0010951|negative regulation of endopeptidase activity;GO:0021987|cerebral cortex development;GO:0030308|negative regulation of cell growth;GO:0030502|negative regulation of bone mineralization;GO:0031100|animal organ regeneration;GO:0032869|cellular response to insulin stimulus;GO:0045780|positive regulat…	GO:0005576|extracellular region;GO:0005615|extracellular space;GO:0005794|Golgi apparatus;GO:0016020|membrane;GO:0031012|extracellular matrix;GO:0032991|protein-containing complex;GO:0062023|collagen-containing extracellular matrix;	GO:0004866|endopeptidase inhibitor activity;GO:0004869|cysteine-type endopeptidase inhibitor activity;GO:0019210|kinase inhibitor activity;GO:0030294|receptor signaling protein tyrosine kinase inhibitor activity;	NA	NA	NA
AABR07034636.1	0	0	0	0	0	0	0	0	0	ENSRNOG00000056037	NA	11	78348550	78351318	+	lncRNA	NA	NA	NA	NA	NA	NA
AABR07034639.1	222	156	201	201	191	213	267	268	331	ENSRNOG00000031273	363817	11	78781082	78781564	-	protein_coding	GO:0006412|translation;	NA	NA	NA	NA	NA
AABR07034641.1	1	0	0	1	1	0	1	0	1	ENSRNOG00000033115	NA	11	78825220	78825702	+	protein_coding	NA	NA	NA	NA	NA	NA
AABR07034648.1	1	1	0	1	0	1	187	119	42	ENSRNOG00000047894	681694	11	79033312	79081625	+	protein_coding	GO:0006629|lipid metabolic process;GO:0016042|lipid catabolic process;	GO:0005576|extracellular region;GO:0005615|extracellular space;GO:0005886|plasma membrane;	GO:0004620|phospholipase activity;GO:0008201|heparin binding;GO:0016298|lipase activity;GO:0046872|metal ion binding;	NA	NA	NA
AABR07034657.1	5	8	13	9	8	3	3	1	7	ENSRNOG00000039674	120095693	11	79163634	79163960	+	protein_coding	GO:0016925|protein sumoylation;GO:0034599|cellular response to oxidative stress;GO:0043122|regulation of I-kappaB kinase/NF-kappaB signaling;GO:0043388|positive regulation of DNA binding;GO:0043392|negative regulation of DNA binding;GO:0045892|negative regulation of DNA-templated transcription;GO:1900180|regulation of protein localization to nucleus;	GO:0106068|SUMO ligase complex;	NA	K12160|small ubiquitin-related modifier;K12160|small ubiquitin-related modifier;	rno03013;rno05418;	Nucleocytoplasmic transport;Fluid shear stress and atherosclerosis;
AABR07034697.1	0	0	1	0	0	0	0	0	0	ENSRNOG00000061393	120095734	11	80624923	80625057	-	snoRNA	NA	NA	NA	NA	NA	NA
AABR07034706.1	0	0	0	0	0	0	1	2	1	ENSRNOG00000038119	NA	11	81052095	81058321	+	protein_coding	NA	NA	NA	NA	NA	NA
AABR07034729.1	0	0	0	0	0	0	0	0	0	ENSRNOG00000042193	NA	11	81518181	81518675	+	protein_coding	NA	NA	NA	NA	NA	NA
AABR07034729.3	0	0	0	0	0	0	0	0	0	ENSRNOG00000051751	120095761	11	81481857	81481980	-	snoRNA	NA	NA	NA	NA	NA	NA
AABR07034730.2	0	0	0	0	0	0	0	0	0	ENSRNOG00000050898	NA	11	81620545	81651699	+	protein_coding	NA	NA	NA	NA	NA	NA
AABR07034730.3	0	0	0	0	0	0	0	0	0	ENSRNOG00000057165	NA	11	81594647	81595950	+	protein_coding	NA	NA	NA	NA	NA	NA
AABR07034736.1	0	0	0	0	0	0	0	0	0	ENSRNOG00000053527	NA	11	81668651	81668947	+	IG_V_gene	NA	NA	NA	NA	NA	NA
AABR07034739.1	0	0	0	0	0	0	0	0	0	ENSRNOG00000050000	NA	11	81914966	81915280	+	protein_coding	NA	NA	NA	NA	NA	NA
AABR07034739.2	0	0	0	0	0	0	0	0	0	ENSRNOG00000058590	100361706	11	81947934	81949822	+	protein_coding	NA	GO:0009897|external side of plasma membrane;GO:0019815|B cell receptor complex;	NA	NA	NA	NA
AABR07034756.1	0	0	0	0	0	0	0	0	0	ENSRNOG00000058838	120095750	11	84153942	84154074	+	snoRNA	NA	NA	NA	NA	NA	NA
AABR07034923.1	0	0	0	0	0	0	0	0	0	ENSRNOG00000051294	689594	12	46534	56425	-	protein_coding	GO:0001556|oocyte maturation;GO:0017148|negative regulation of translation;	GO:0005737|cytoplasm;GO:0043232|intracellular non-membrane-bounded organelle;	GO:0003730|mRNA 3'-UTR binding;	NA	NA	NA
AABR07034926.1	0	0	0	0	0	0	0	0	1	ENSRNOG00000051807	120096119	12	244785	244876	-	snoRNA	NA	NA	NA	NA	NA	NA
AABR07034928.1	0	0	0	0	0	0	0	0	0	ENSRNOG00000034215	NA	12	439533	439826	-	protein_coding	NA	NA	NA	NA	NA	NA
AABR07034964.1	0	0	0	0	0	0	0	0	0	ENSRNOG00000052516	NA	12	1768500	1768883	-	pseudogene	NA	NA	NA	NA	NA	NA
AABR07035074.1	308	302	307	273	294	251	296	260	355	ENSRNOG00000028592	NA	12	3116721	3118626	+	protein_coding	NA	NA	NA	NA	NA	NA
AABR07035091.1	6	14	3	7	8	11	16	5	3	ENSRNOG00000001071	688606	12	2777231	2777551	-	protein_coding	NA	GO:0005743|mitochondrial inner membrane;	NA	NA	NA	NA
AABR07035203.1	1	2	0	0	1	2	0	0	0	ENSRNOG00000060198	NA	12	5673622	5677023	-	protein_coding	NA	NA	NA	NA	NA	NA
AABR07035213.1	0	0	0	0	0	0	0	0	0	ENSRNOG00000057377	120096113	12	5923196	5923336	-	snoRNA	NA	NA	NA	NA	NA	NA
AABR07035218.1	1193	1218	1240	1132	1104	1051	543	553	645	ENSRNOG00000029813	25459	12	5901586	5978565	+	protein_coding	GO:0000122|negative regulation of transcription by RNA polymerase II;GO:0000902|cell morphogenesis;GO:0001654|eye development;GO:0001773|myeloid dendritic cell activation;GO:0001934|positive regulation of protein phosphorylation;GO:0001935|endothelial cell proliferation;GO:0002053|positive regulation of mesenchymal cell proliferation;GO:0002218|activation of innate immune response;GO:0002270|plas…	GO:0000785|chromatin;GO:0000793|condensed chromosome;GO:0005576|extracellular region;GO:0005615|extracellular space;GO:0005634|nucleus;GO:0005694|chromosome;GO:0005737|cytoplasm;GO:0005769|early endosome;GO:0005783|endoplasmic reticulum;GO:0005793|endoplasmic reticulum-Golgi intermediate compartment;GO:0005829|cytosol;GO:0005886|plasma membrane;GO:0009986|cell surface;GO:0017053|transcription rep…	GO:0000400|four-way junction DNA binding;GO:0000401|open form four-way junction DNA binding;GO:0000402|crossed form four-way junction DNA binding;GO:0000405|bubble DNA binding;GO:0000976|transcription cis-regulatory region binding;GO:0001530|lipopolysaccharide binding;GO:0001786|phosphatidylserine binding;GO:0003676|nucleic acid binding;GO:0003677|DNA binding;GO:0003681|bent DNA binding;GO:000368…	K10802|high mobility group protein B1;K10802|high mobility group protein B1;K10802|high mobility group protein B1;K10802|high mobility group protein B1;	rno03410;rno04140;rno04217;rno04613;	Base excision repair;Autophagy - animal;Necroptosis;Neutrophil extracellular trap formation;
AABR07035338.1	787	680	741	695	740	671	548	519	595	ENSRNOG00000039819	498140	12	8737262	8804177	-	protein_coding	GO:0006468|protein phosphorylation;GO:0016567|protein ubiquitination;GO:0090209|negative regulation of triglyceride metabolic process;	GO:0000151|ubiquitin ligase complex;GO:0005634|nucleus;GO:0005730|nucleolus;GO:0016592|mediator complex;GO:0032991|protein-containing complex;	GO:0004672|protein kinase activity;GO:0004674|protein serine/threonine kinase activity;GO:0005524|ATP binding;GO:0061630|ubiquitin protein ligase activity;	NA	NA	NA
AABR07035343.1	0	0	0	0	0	0	0	0	0	ENSRNOG00000062027	NA	12	9015383	9285008	-	protein_coding	NA	NA	NA	NA	NA	NA
AABR07035348.1	0	0	0	0	0	0	0	0	0	ENSRNOG00000047745	NA	12	8956457	9285008	-	protein_coding	NA	NA	NA	NA	NA	NA
AABR07035357.2	0	0	0	0	0	0	0	0	0	ENSRNOG00000050264	120095889	12	8631628	8632095	+	protein_coding	NA	NA	NA	NA	NA	NA
AABR07035366.1	0	0	0	0	0	0	0	0	0	ENSRNOG00000032866	NA	6	35536103	35536510	-	pseudogene	NA	NA	NA	NA	NA	NA
AABR07035368.1	0	0	0	0	0	0	0	0	0	ENSRNOG00000051066	100362016	15	24667079	24667414	+	processed_pseudogene	NA	NA	NA	NA	NA	NA
AABR07035374.1	0	0	0	0	0	0	0	0	0	ENSRNOG00000000978	498198	12	8956457	9285008	-	protein_coding	NA	GO:0005789|endoplasmic reticulum membrane;GO:0016020|membrane;	GO:0004497|monooxygenase activity;GO:0005506|iron ion binding;GO:0016705|oxidoreductase activity, acting on paired donors, with incorporation or reduction of molecular oxygen;GO:0016712|oxidoreductase activity, acting on paired donors, with incorporation or reduction of molecular oxygen, reduced flavin or flavoprotein as one donor, and incorporation of one atom of oxygen;GO:0020037|heme binding;	NA	NA	NA
AABR07035383.1	3	3	3	1	0	4	1	1	2	ENSRNOG00000025217	100360200	12	10211798	10212670	+	protein_coding	GO:0098789|pre-mRNA cleavage required for polyadenylation;	GO:0005847|mRNA cleavage and polyadenylation specificity factor complex;	GO:0003723|RNA binding;GO:0008270|zinc ion binding;	K14404|cleavage and polyadenylation specificity factor subunit 4;K14404|cleavage and polyadenylation specificity factor subunit 4;	rno03015;rno05164;	mRNA surveillance pathway;Influenza A;
AABR07035428.2	338	309	362	314	294	272	359	301	282	ENSRNOG00000056768	641386	12	12093834	12108511	-	protein_coding	GO:0000724|double-strand break repair via homologous recombination;GO:0008150|biological_process;GO:0016197|endosomal transport;	GO:0005575|cellular_component;GO:0005634|nucleus;GO:0005654|nucleoplasm;GO:0005737|cytoplasm;GO:0016607|nuclear speck;GO:0044599|AP-5 adaptor complex;	GO:0003674|molecular_function;	NA	NA	NA
AABR07035428.3	17	15	40	10	16	19	10	15	15	ENSRNOG00000059768	NA	12	12115739	12115969	+	protein_coding	NA	NA	NA	NA	NA	NA
AABR07035501.1	0	0	0	0	0	0	0	0	0	ENSRNOG00000049220	NA	12	16100317	16105431	-	protein_coding	NA	NA	NA	NA	NA	NA
AABR07035503.1	0	0	0	0	0	0	0	0	0	ENSRNOG00000054170	100361826	12	16110838	16115795	-	protein_coding	GO:0050863|regulation of T cell activation;GO:2000404|regulation of T cell migration;	NA	GO:0004888|transmembrane signaling receptor activity;	NA	NA	NA
AABR07035541.3	0	1	0	0	0	0	0	3	0	ENSRNOG00000061371	103691088	12	16989748	16990086	-	protein_coding	NA	NA	NA	NA	NA	NA
AABR07035561.2	0	0	0	0	0	0	0	0	0	ENSRNOG00000051906	680923	12	17364080	17365280	+	protein_coding	GO:0050860|negative regulation of T cell receptor signaling pathway;	GO:0005886|plasma membrane;	GO:0019902|phosphatase binding;GO:0038023|signaling receptor activity;	NA	NA	NA
AABR07035776.1	0	0	0	0	0	0	3	5	0	ENSRNOG00000050059	100910497	12	18869048	18880075	+	protein_coding	NA	GO:0016020|membrane;	NA	NA	NA	NA
AABR07035787.1	2188	1966	2112	2045	1940	1625	1174	998	1018	ENSRNOG00000048277	686980	12	19392625	19406095	+	protein_coding	GO:0006355|regulation of DNA-templated transcription;GO:0006397|mRNA processing;GO:0031053|primary miRNA processing;GO:0050769|positive regulation of neurogenesis;GO:0097150|neuronal stem cell population maintenance;	GO:0005654|nucleoplasm;GO:0005737|cytoplasm;GO:0032991|protein-containing complex;GO:1990904|ribonucleoprotein complex;	GO:0003677|DNA binding;GO:0030674|protein-macromolecule adaptor activity;GO:0140262|mRNA cap binding complex binding;	NA	NA	NA
AABR07035832.1	1	0	0	1	0	0	1	1	0	ENSRNOG00000055795	NA	12	21043509	21043782	+	protein_coding	NA	NA	NA	NA	NA	NA
AABR07035839.1	0	3	0	0	0	0	0	0	0	ENSRNOG00000046171	171078	12	21543576	21577112	-	protein_coding	GO:0000122|negative regulation of transcription by RNA polymerase II;GO:0006110|regulation of glycolytic process;GO:0006357|regulation of transcription by RNA polymerase II;GO:0008284|positive regulation of cell population proliferation;GO:0009749|response to glucose;GO:0010255|glucose mediated signaling pathway;GO:0031667|response to nutrient levels;GO:0033137|negative regulation of peptidyl-ser…	GO:0005634|nucleus;GO:0005654|nucleoplasm;GO:0005667|transcription regulator complex;GO:0005737|cytoplasm;GO:0005829|cytosol;	GO:0000978|RNA polymerase II cis-regulatory region sequence-specific DNA binding;GO:0000981|DNA-binding transcription factor activity, RNA polymerase II-specific;GO:0001227|DNA-binding transcription repressor activity, RNA polymerase II-specific;GO:0003677|DNA binding;GO:0003700|DNA-binding transcription factor activity;GO:0005515|protein binding;GO:0019901|protein kinase binding;GO:0035538|carbo…	K09113|MAX-like protein X;K09113|MAX-like protein X;	rno04931;rno04932;	Insulin resistance;Non-alcoholic fatty liver disease;
AABR07036011.1	0	1	2	1	1	0	1	0	2	ENSRNOG00000056264	120096123	12	26923920	26924065	-	snoRNA	NA	NA	NA	NA	NA	NA
AABR07036324.1	0	0	0	0	0	0	0	0	0	ENSRNOG00000026192	690028	12	33092097	33105037	+	protein_coding	GO:0007165|signal transduction;	GO:0005615|extracellular space;GO:0016020|membrane;	GO:0005125|cytokine activity;GO:0005126|cytokine receptor binding;GO:0005147|oncostatin-M receptor binding;	K22631|interleukin 31;K22631|interleukin 31;	rno04060;rno04630;	Cytokine-cytokine receptor interaction;JAK-STAT signaling pathway;
AABR07036374.1	1	1	3	3	1	0	1	4	0	ENSRNOG00000037801	NA	12	35037343	35041082	+	protein_coding	NA	NA	NA	NA	NA	NA
AABR07036375.1	1	0	1	0	2	1	0	2	1	ENSRNOG00000029341	100909911	12	35155978	35156316	-	protein_coding	GO:0006412|translation;	NA	GO:0003723|RNA binding;	NA	NA	NA
AABR07036463.1	0	0	1	0	1	1	2	1	0	ENSRNOG00000055283	120096118	12	38304993	38305111	-	snoRNA	NA	NA	NA	NA	NA	NA
AABR07036498.1	0	0	0	0	0	0	0	0	0	ENSRNOG00000030813	NA	12	39165901	39166252	+	protein_coding	NA	NA	NA	NA	NA	NA
AABR07036498.2	0	0	0	0	0	0	0	0	0	ENSRNOG00000055445	120096110	12	39170066	39170174	+	snoRNA	NA	NA	NA	NA	NA	NA
AABR07036505.1	0	0	0	0	0	0	0	0	0	ENSRNOG00000052647	NA	16	11344202	11347032	-	protein_coding	NA	NA	NA	NA	NA	NA
AABR07036550.1	24	17	23	23	17	18	28	41	14	ENSRNOG00000047191	687866	12	42247138	42323730	-	protein_coding	NA	GO:0016459|myosin complex;	GO:0003774|cytoskeletal motor activity;GO:0003779|actin binding;GO:0005524|ATP binding;	K10356|myosin I;	rno04814;	Motor proteins;
AABR07036567.1	2	0	1	0	0	0	0	0	0	ENSRNOG00000020112	NA	12	42791929	42792339	+	protein_coding	NA	NA	NA	NA	NA	NA
AABR07036698.1	0	0	0	0	0	0	0	0	0	ENSRNOG00000046702	NA	X	484504	488125	+	protein_coding	NA	NA	NA	NA	NA	NA
AABR07036711.1	0	0	0	0	0	0	0	0	0	ENSRNOG00000049427	103690782	X	698882	715907	+	protein_coding	GO:0006355|regulation of DNA-templated transcription;	NA	NA	NA	NA	NA
AABR07036855.1	792	736	756	664	682	696	814	631	827	ENSRNOG00000056398	100359876	X	4032895	4033896	+	protein_coding	GO:0006189|'de novo' IMP biosynthetic process;	NA	GO:0004638|phosphoribosylaminoimidazole carboxylase activity;GO:0005524|ATP binding;GO:0043727|5-amino-4-imidazole carboxylate lyase activity;	NA	NA	NA
AABR07036974.1	0	0	0	0	0	0	0	0	1	ENSRNOG00000030819	NA	X	7871598	7872298	+	protein_coding	NA	NA	NA	NA	NA	NA
AABR07037058.1	8	8	4	7	4	4	8	11	10	ENSRNOG00000023163	503429	X	10146293	10147145	-	protein_coding	GO:0006850|mitochondrial pyruvate transmembrane transport;	GO:0005743|mitochondrial inner membrane;	NA	K22138|mitochondrial pyruvate carrier 1;	rno05415;	Diabetic cardiomyopathy;
AABR07037073.1	0	0	0	0	0	0	0	0	0	ENSRNOG00000003227	NA	X	10788541	10789499	-	protein_coding	NA	NA	NA	NA	NA	NA
AABR07037176.1	0	0	0	0	0	0	0	0	0	ENSRNOG00000058703	120099520	X	14210896	14211015	+	snoRNA	NA	NA	NA	NA	NA	NA
AABR07037203.1	312	269	284	281	279	265	78	73	65	ENSRNOG00000028611	501526	X	15096359	15097909	-	protein_coding	GO:0006355|regulation of DNA-templated transcription;	GO:0005634|nucleus;	GO:0003723|RNA binding;GO:0046872|metal ion binding;	NA	NA	NA
AABR07037234.1	0	0	0	0	0	0	0	0	0	ENSRNOG00000062241	NA	X	15861367	15863381	+	protein_coding	NA	NA	NA	NA	NA	NA
AABR07037243.1	2	0	1	1	1	2	2	0	0	ENSRNOG00000002975	367749	X	16093778	16094386	+	protein_coding	NA	NA	GO:0046872|metal ion binding;	NA	NA	NA
AABR07037250.1	0	0	0	0	0	0	0	0	0	ENSRNOG00000039305	102547118	X	16368962	16372256	-	protein_coding	GO:0048599|oocyte development;GO:0061086|negative regulation of histone H3-K27 methylation;GO:1902465|negative regulation of histone H3-K27 trimethylation;	GO:0005634|nucleus;GO:0005654|nucleoplasm;GO:0005829|cytosol;	GO:0044877|protein-containing complex binding;	NA	NA	NA
AABR07037343.1	3	4	1	0	2	0	1	5	6	ENSRNOG00000003158	367766	X	18099866	18100291	+	protein_coding	GO:0006412|translation;	NA	NA	NA	NA	NA
AABR07037356.1	0	0	0	0	0	0	0	0	0	ENSRNOG00000048990	NA	X	18566673	18569020	-	pseudogene	NA	NA	NA	NA	NA	NA
AABR07037406.1	0	0	0	0	0	1	0	0	0	ENSRNOG00000062296	NA	X	20002273	20003077	-	pseudogene	NA	NA	NA	NA	NA	NA
AABR07037412.1	0	0	0	0	0	0	0	0	0	ENSRNOG00000030999	NA	X	20199181	20199663	-	protein_coding	NA	NA	NA	NA	NA	NA
AABR07037419.1	8	7	10	7	6	12	2	4	0	ENSRNOG00000038965	100362724	X	20493679	20494995	+	protein_coding	NA	NA	NA	NA	NA	NA
AABR07037436.1	296	270	265	311	291	290	229	197	193	ENSRNOG00000049908	100359832	X	19349560	19378486	-	protein_coding	NA	GO:0005635|nuclear envelope;	NA	NA	NA	NA
AABR07037489.1	316	277	290	268	271	225	211	226	253	ENSRNOG00000060137	64021	X	21447361	21471498	-	protein_coding	GO:0007186|G protein-coupled receptor signaling pathway;GO:0097211|cellular response to gonadotropin-releasing hormone;GO:2001223|negative regulation of neuron migration;	GO:0005886|plasma membrane;GO:0016020|membrane;	GO:0004930|G protein-coupled receptor activity;GO:0004968|gonadotropin-releasing hormone receptor activity;	NA	NA	NA
AABR07037520.1	175	152	177	138	129	144	127	127	206	ENSRNOG00000047491	NA	X	19563794	19567126	-	protein_coding	NA	NA	NA	NA	NA	NA
AABR07037738.1	0	0	0	0	0	0	0	0	0	ENSRNOG00000060763	120099496	X	27757207	27757338	+	snoRNA	NA	NA	NA	NA	NA	NA
AABR07037798.1	0	0	0	0	0	0	0	0	0	ENSRNOG00000003342	NA	X	29294660	29295183	-	pseudogene	NA	NA	NA	NA	NA	NA
AABR07037800.1	0	0	0	0	0	0	0	0	0	ENSRNOG00000027239	NA	X	29333112	29334044	+	protein_coding	NA	NA	NA	NA	NA	NA
AABR07037847.1	0	0	0	0	0	0	0	0	0	ENSRNOG00000058942	120099467	X	31427829	31427972	+	snoRNA	NA	NA	NA	NA	NA	NA
AABR07037854.2	0	0	0	0	0	0	0	0	0	ENSRNOG00000061257	120099521	X	31943580	31943706	-	snoRNA	NA	NA	NA	NA	NA	NA
AABR07037878.1	0	0	0	0	0	0	0	0	0	ENSRNOG00000032797	302688	X	32930967	32931856	-	protein_coding	NA	GO:0005743|mitochondrial inner membrane;GO:0005886|plasma membrane;	NA	NA	NA	NA
AABR07037878.2	0	0	0	0	2	0	0	0	0	ENSRNOG00000052694	102550809	X	32894327	32911366	+	protein_coding	NA	GO:0001673|male germ cell nucleus;GO:0001674|female germ cell nucleus;	NA	NA	NA	NA
AABR07037896.1	0	0	0	0	0	0	0	0	0	ENSRNOG00000058952	NA	X	33368301	33461567	-	pseudogene	NA	NA	NA	NA	NA	NA
AABR07037995.1	110	71	93	95	79	86	55	31	44	ENSRNOG00000003949	678739	X	34171323	34293466	-	protein_coding	GO:0005977|glycogen metabolic process;GO:0006468|protein phosphorylation;	GO:0005886|plasma membrane;GO:0005964|phosphorylase kinase complex;	GO:0005516|calmodulin binding;	K07190|phosphorylase kinase alpha/beta subunit;K07190|phosphorylase kinase alpha/beta subunit;K07190|phosphorylase kinase alpha/beta subunit;	rno04020;rno04910;rno04922;	Calcium signaling pathway;Insulin signaling pathway;Glucagon signaling pathway;
AABR07037998.1	0	0	0	0	0	0	0	0	0	ENSRNOG00000032132	367795	X	34393954	34394418	+	protein_coding	GO:0006412|translation;	NA	NA	NA	NA	NA
AABR07038019.1	107	85	127	98	78	98	108	90	136	ENSRNOG00000004319	100361543	X	34637459	34638516	+	protein_coding	GO:0001558|regulation of cell growth;GO:0001919|regulation of receptor recycling;GO:0007032|endosome organization;GO:0007040|lysosome organization;GO:0008104|protein localization;GO:0010874|regulation of cholesterol efflux;GO:0016197|endosomal transport;GO:0032008|positive regulation of TOR signaling;GO:0032418|lysosome localization;GO:0042632|cholesterol homeostasis;GO:0043410|positive regulatio…	GO:0005764|lysosome;GO:0005765|lysosomal membrane;GO:0005886|plasma membrane;GO:0031902|late endosome membrane;GO:0045121|membrane raft;GO:0071986|Ragulator complex;	GO:0005085|guanyl-nucleotide exchange factor activity;GO:0005515|protein binding;GO:0060090|molecular adaptor activity;	K20397|ragulator complex protein LAMTOR1;	rno04150;	mTOR signaling pathway;
AABR07038019.2	0	0	0	0	0	0	0	0	0	ENSRNOG00000054868	120099465	X	34655680	34655817	-	snoRNA	NA	NA	NA	NA	NA	NA
AABR07038029.1	6	7	5	4	13	20	13	14	21	ENSRNOG00000025290	501558	X	34713175	34858807	-	protein_coding	GO:0000165|MAPK cascade;GO:0006468|protein phosphorylation;	NA	GO:0005524|ATP binding;GO:0046872|metal ion binding;	NA	NA	NA
AABR07038114.1	3	0	1	0	0	0	0	0	1	ENSRNOG00000056924	120099497	X	37585680	37585810	-	snoRNA	NA	NA	NA	NA	NA	NA
AABR07038219.1	0	0	0	0	0	0	0	0	0	ENSRNOG00000051820	120099510	X	40263552	40263677	-	snoRNA	NA	NA	NA	NA	NA	NA
AABR07038250.1	0	0	0	0	0	0	0	0	0	ENSRNOG00000003860	NA	X	40572009	40572728	+	protein_coding	NA	NA	NA	NA	NA	NA
AABR07038269.1	0	0	0	1	0	0	0	1	0	ENSRNOG00000050081	NA	X	40882470	40883384	+	protein_coding	NA	NA	NA	NA	NA	NA
AABR07038355.1	30	25	42	26	19	24	54	58	62	ENSRNOG00000030048	501568	X	43263490	43616852	-	protein_coding	GO:0007288|sperm axoneme assembly;	GO:0097224|sperm connecting piece;	NA	NA	NA	NA
AABR07038464.1	0	0	0	0	0	0	0	0	0	ENSRNOG00000061492	NA	X	46222154	46222636	-	protein_coding	NA	NA	NA	NA	NA	NA
AABR07038477.1	0	0	0	0	0	0	0	0	0	ENSRNOG00000038369	NA	X	46627306	46640395	+	protein_coding	NA	NA	NA	NA	NA	NA
AABR07038505.1	0	0	0	0	0	0	0	0	0	ENSRNOG00000059086	120099464	X	47174190	47174326	-	snoRNA	NA	NA	NA	NA	NA	NA
AABR07038552.1	0	0	0	0	0	0	0	0	0	ENSRNOG00000028179	102553413	X	50827563	50833151	-	protein_coding	NA	GO:0005737|cytoplasm;	NA	NA	NA	NA
AABR07038553.1	0	0	0	0	0	0	0	0	0	ENSRNOG00000048202	NA	X	50886684	50888014	-	protein_coding	NA	NA	NA	NA	NA	NA
AABR07038554.1	0	0	0	0	0	0	0	0	0	ENSRNOG00000038267	NA	X	50915587	50917150	-	protein_coding	NA	NA	NA	NA	NA	NA
AABR07038556.1	0	0	0	0	0	0	0	0	0	ENSRNOG00000042751	503442	X	50966208	50967245	-	protein_coding	NA	NA	NA	NA	NA	NA
AABR07038567.1	0	0	0	0	0	0	0	0	0	ENSRNOG00000047748	NA	1	68611722	68612081	+	protein_coding	NA	NA	NA	NA	NA	NA
AABR07038578.1	4	0	1	0	1	1	4	4	5	ENSRNOG00000051159	NA	10	36131492	36132150	-	pseudogene	NA	NA	NA	NA	NA	NA
AABR07038657.1	0	0	0	0	0	0	0	0	0	ENSRNOG00000032858	NA	X	53718605	53719750	+	protein_coding	NA	NA	NA	NA	NA	NA
AABR07038661.1	0	0	0	0	0	0	0	0	0	ENSRNOG00000038257	681382	X	53848510	53848770	+	protein_coding	GO:0000278|mitotic cell cycle;GO:0051382|kinetochore assembly;	NA	GO:0003677|DNA binding;GO:0046982|protein heterodimerization activity;	NA	NA	NA
AABR07038676.1	0	0	0	0	0	0	0	0	0	ENSRNOG00000028202	NA	X	118534007	118534564	-	protein_coding	NA	NA	NA	NA	NA	NA
AABR07038690.1	0	0	0	0	0	0	0	0	0	ENSRNOG00000003345	302762	X	54488781	54491141	-	protein_coding	GO:0016567|protein ubiquitination;	GO:0005634|nucleus;	NA	NA	NA	NA
AABR07038703.1	0	0	0	0	0	0	0	0	0	ENSRNOG00000051223	NA	X	54564018	54565271	-	protein_coding	NA	NA	NA	NA	NA	NA
AABR07038712.1	0	0	0	0	0	0	0	0	0	ENSRNOG00000031719	302447	X	54782268	54889921	+	protein_coding	NA	NA	NA	K17491|protein phosphatase 4 regulatory subunit 3;	rno04922;	Glucagon signaling pathway;
AABR07038714.1	0	0	0	0	0	0	0	0	0	ENSRNOG00000051287	100909486	X	55009467	55012137	-	protein_coding	NA	NA	NA	K17491|protein phosphatase 4 regulatory subunit 3;	rno04922;	Glucagon signaling pathway;
AABR07038766.1	0	0	0	0	0	0	0	0	0	ENSRNOG00000030346	NA	X	56057205	56058313	+	protein_coding	NA	NA	NA	NA	NA	NA
AABR07038788.1	0	0	0	0	0	0	0	0	0	ENSRNOG00000029559	317272	X	56396804	56399326	+	protein_coding	NA	NA	NA	K17491|protein phosphatase 4 regulatory subunit 3;	rno04922;	Glucagon signaling pathway;
AABR07038795.1	0	0	0	0	0	0	0	0	0	ENSRNOG00000055102	NA	X	56492713	56494541	-	protein_coding	NA	NA	NA	NA	NA	NA
AABR07038843.1	0	0	0	0	0	0	0	0	0	ENSRNOG00000061126	120099463	X	58296032	58296153	-	scaRNA	NA	NA	NA	NA	NA	NA
AABR07038849.1	48	59	50	55	47	40	119	161	116	ENSRNOG00000051341	NA	X	58469935	58471623	-	lncRNA	NA	NA	NA	NA	NA	NA
AABR07038853.1	0	0	0	0	0	0	0	0	0	ENSRNOG00000046012	683205	X	58604556	58605110	+	processed_pseudogene	NA	NA	NA	NA	NA	NA
AABR07038858.1	0	0	0	1	0	0	0	0	0	ENSRNOG00000048066	314107	X	58646432	58649965	-	protein_coding	GO:0006351|DNA-templated transcription;	GO:0000124|SAGA complex;	GO:0003712|transcription coregulator activity;	NA	NA	NA
AABR07038863.2	0	0	0	0	0	0	0	0	0	ENSRNOG00000051319	NA	X	31558180	31558623	-	pseudogene	NA	NA	NA	NA	NA	NA
AABR07038871.1	0	1	0	1	1	0	0	2	0	ENSRNOG00000051544	120099460	X	58941502	58941601	+	snoRNA	NA	NA	NA	NA	NA	NA
AABR07038881.1	0	0	0	0	0	0	0	0	0	ENSRNOG00000038181	NA	8	71664149	71665581	+	protein_coding	NA	NA	NA	NA	NA	NA
AABR07038930.1	58	52	65	46	34	56	35	34	21	ENSRNOG00000038169	299038	X	59891581	59892330	-	protein_coding	GO:0007276|gamete generation;	NA	GO:0035064|methylated histone binding;	NA	NA	NA
AABR07038948.2	19	14	15	18	11	16	2	13	6	ENSRNOG00000055020	NA	1	39601959	39603122	-	pseudogene	NA	NA	NA	NA	NA	NA
AABR07038957.1	0	0	0	0	0	0	0	0	0	ENSRNOG00000054638	NA	X	60551836	60552240	+	protein_coding	NA	NA	NA	NA	NA	NA
AABR07038957.2	0	0	0	0	0	0	0	0	0	ENSRNOG00000057091	NA	X	60551686	60552959	-	protein_coding	NA	NA	NA	NA	NA	NA
AABR07038979.1	0	0	0	0	0	0	0	2	5	ENSRNOG00000059358	120093051	X	61048964	61049099	-	scaRNA	NA	NA	NA	NA	NA	NA
AABR07038981.1	0	0	0	0	0	0	0	0	0	ENSRNOG00000029935	NA	X	59540712	59541248	+	protein_coding	NA	NA	NA	NA	NA	NA
AABR07038983.1	5	0	0	0	0	0	0	0	0	ENSRNOG00000051216	120099372	X	61138374	61144585	+	lncRNA	NA	NA	NA	NA	NA	NA
AABR07039058.1	66	55	54	65	48	49	202	237	345	ENSRNOG00000051048	NA	16	24029964	24031270	+	pseudogene	NA	NA	NA	NA	NA	NA
AABR07039075.1	0	0	0	0	0	0	0	0	0	ENSRNOG00000032738	NA	X	56346821	56347522	-	protein_coding	NA	NA	NA	NA	NA	NA
AABR07039112.1	0	0	0	0	0	0	0	0	0	ENSRNOG00000022855	NA	X	63890728	63892224	+	protein_coding	NA	NA	NA	NA	NA	NA
AABR07039133.2	158	113	148	134	151	147	166	178	249	ENSRNOG00000031517	688784	X	64321142	64321628	-	protein_coding	GO:0006412|translation;	GO:0005791|rough endoplasmic reticulum;GO:0005840|ribosome;GO:1990904|ribonucleoprotein complex;	GO:0003735|structural constituent of ribosome;	NA	NA	NA
AABR07039169.1	0	0	0	0	0	0	0	0	0	ENSRNOG00000051198	NA	9	106525843	106526701	-	protein_coding	NA	NA	NA	NA	NA	NA
AABR07039174.1	0	0	0	0	0	0	0	0	0	ENSRNOG00000045577	120099530	X	14538047	14538248	-	snRNA	NA	NA	NA	NA	NA	NA
AABR07039199.1	0	0	0	1	0	0	1	0	0	ENSRNOG00000056465	120099453	X	66575952	66576115	-	snoRNA	NA	NA	NA	NA	NA	NA
AABR07039202.2	0	0	0	0	0	0	0	0	0	ENSRNOG00000058792	120099518	X	66671627	66671751	+	snoRNA	NA	NA	NA	NA	NA	NA
AABR07039206.1	0	0	0	0	0	0	0	0	0	ENSRNOG00000060462	102555994	X	66936167	66939721	-	protein_coding	NA	NA	NA	NA	NA	NA
AABR07039210.1	629	547	644	482	618	543	175	148	206	ENSRNOG00000037951	317253	X	66970151	67200911	+	protein_coding	NA	NA	NA	NA	NA	NA
AABR07039210.2	114	111	106	133	100	81	492	383	263	ENSRNOG00000045779	100911832	X	67184154	67188809	-	protein_coding	NA	NA	NA	NA	NA	NA
AABR07039214.1	0	0	0	0	0	0	1	0	0	ENSRNOG00000051117	NA	X	67283894	67284115	-	processed_pseudogene	NA	NA	NA	NA	NA	NA
AABR07039218.1	42	38	52	42	42	31	27	19	28	ENSRNOG00000003062	679960	X	67672596	67673816	+	protein_coding	NA	NA	NA	NA	NA	NA
AABR07039218.2	3	1	1	2	3	0	3	5	4	ENSRNOG00000051047	100360708	5	153655012	153655482	+	protein_coding	GO:0006412|translation;	GO:0005737|cytoplasm;GO:0005840|ribosome;GO:1990904|ribonucleoprotein complex;	GO:0003735|structural constituent of ribosome;	NA	NA	NA
AABR07039303.1	0	0	0	0	0	0	1	0	0	ENSRNOG00000027907	363507	X	133556226	133574454	-	protein_coding	NA	NA	NA	NA	NA	NA
AABR07039303.2	0	0	0	0	0	0	0	0	0	ENSRNOG00000037455	100360496	X	133519185	133531913	-	protein_coding	NA	NA	NA	NA	NA	NA
AABR07039303.7	0	0	1	0	1	0	0	0	0	ENSRNOG00000061703	100910451	X	133464368	133470554	+	protein_coding	NA	NA	NA	NA	NA	NA
AABR07039304.1	0	0	0	0	0	0	0	0	0	ENSRNOG00000048213	NA	X	133368485	133368979	+	protein_coding	NA	NA	NA	NA	NA	NA
AABR07039307.1	150	131	182	174	125	147	130	106	138	ENSRNOG00000046832	NA	X	133428144	133430650	-	lncRNA	NA	NA	NA	NA	NA	NA
AABR07039316.1	1	2	0	4	1	6	3	1	0	ENSRNOG00000022286	680068	X	67928231	67963076	-	protein_coding	NA	NA	NA	NA	NA	NA
AABR07039325.1	1358	1205	1353	1248	1254	1259	2077	1815	2599	ENSRNOG00000051197	120097345	1	155597292	155598165	-	pseudogene	NA	NA	NA	NA	NA	NA
AABR07039328.2	1671	1533	1547	1388	1483	1448	1048	1079	1396	ENSRNOG00000051300	NA	X	68983267	68985382	-	lncRNA	NA	NA	NA	NA	NA	NA
AABR07039334.1	118	104	102	101	111	92	50	46	52	ENSRNOG00000022267	NA	X	68023294	68024825	+	protein_coding	NA	NA	NA	NA	NA	NA
AABR07039336.1	0	0	0	0	0	0	0	0	0	ENSRNOG00000003009	100361639	X	68187704	68219986	-	protein_coding	GO:0006508|proteolysis;	NA	GO:0004252|serine-type endopeptidase activity;	NA	NA	NA
AABR07039336.2	106	96	84	104	81	75	46	39	29	ENSRNOG00000003025	317247	X	68173987	68176666	-	protein_coding	GO:0006334|nucleosome assembly;GO:0016573|histone acetylation;GO:0030182|neuron differentiation;GO:0035066|positive regulation of histone acetylation;GO:0043970|histone H3-K9 acetylation;GO:0044154|histone H3-K14 acetylation;GO:0045666|positive regulation of neuron differentiation;GO:0048863|stem cell differentiation;GO:0071442|positive regulation of histone H3-K14 acetylation;GO:2000035|regulati…	GO:0005634|nucleus;	GO:0003682|chromatin binding;GO:0042393|histone binding;	NA	NA	NA
AABR07039336.3	2	0	0	1	0	0	0	1	0	ENSRNOG00000022251	NA	X	68163828	68165235	-	pseudogene	NA	NA	NA	NA	NA	NA
AABR07039338.1	0	0	0	0	0	0	0	0	0	ENSRNOG00000003008	100361671	X	68228994	68229275	+	protein_coding	NA	GO:0005743|mitochondrial inner membrane;	NA	NA	NA	NA
AABR07039342.1	0	0	0	0	0	0	0	0	0	ENSRNOG00000051644	120099468	X	68260929	68261072	-	snoRNA	NA	NA	NA	NA	NA	NA
AABR07039342.2	0	0	0	0	0	0	0	0	0	ENSRNOG00000058743	120099471	X	68250749	68250888	+	snoRNA	NA	NA	NA	NA	NA	NA
AABR07039345.1	0	0	0	0	0	0	0	0	0	ENSRNOG00000051310	NA	X	107822019	107823594	+	protein_coding	NA	NA	NA	NA	NA	NA
AABR07039356.1	12	11	10	6	8	6	7	2	4	ENSRNOG00000018301	367858	X	68522143	68522712	-	protein_coding	GO:0007165|signal transduction;	GO:0016020|membrane;	GO:0003924|GTPase activity;GO:0005525|GTP binding;	K02833|GTPase HRas;K02833|GTPase HRas;K02833|GTPase HRas;K02833|GTPase HRas;K02833|GTPase HRas;K02833|GTPase HRas;K02833|GTPase HRas;K02833|GTPase HRas;K02833|GTPase HRas;K02833|GTPase HRas;K02833|GTPase HRas;K02833|GTPase HRas;K02833|GTPase HRas;K02833|GTPase HRas;K02833|GTPase HRas;K02833|GTPase HRas;K02833|GTPase HRas;K02833|GTPase HRas;K02833|GTPase HRas;K02833|GTPase HRas;K02833|GTPase HRas;…	rno01521;rno01522;rno04010;rno04012;rno04014;rno04015;rno04062;rno04068;rno04071;rno04072;rno04137;rno04140;rno04144;rno04150;rno04151;rno04210;rno04211;rno04213;rno04218;rno04360;rno04370;rno04371;rno04510;rno04540;rno04550;rno04625;rno04630;rno04650;rno04660;rno04662;rno04664;rno04714;rno04720;rno04722;rno04725;rno04726;rno04730;rno04810;rno04910;rno04912;rno04915;rno04916;rno04917;rno04919;rno…	EGFR tyrosine kinase inhibitor resistance;Endocrine resistance;MAPK signaling pathway;ErbB signaling pathway;Ras signaling pathway;Rap1 signaling pathway;Chemokine signaling pathway;FoxO signaling pathway;Sphingolipid signaling pathway;Phospholipase D signaling pathway;Mitophagy - animal;Autophagy - animal;Endocytosis;mTOR signaling pathway;PI3K-Akt signaling pathway;Apoptosis;Longevity regulatin…
AABR07039377.1	0	0	0	0	0	0	0	0	0	ENSRNOG00000033484	680353	X	68969607	68969819	+	protein_coding	GO:0006412|translation;	NA	NA	NA	NA	NA
AABR07039378.2	0	0	0	0	0	0	0	0	0	ENSRNOG00000060754	120099484	X	69081483	69081618	-	snoRNA	NA	NA	NA	NA	NA	NA
AABR07039446.1	484	389	455	420	403	361	1111	843	832	ENSRNOG00000057517	NA	X	71199173	71201539	-	lncRNA	NA	NA	NA	NA	NA	NA
AABR07039446.2	3	2	0	0	3	0	4	0	2	ENSRNOG00000061403	317227	X	71220367	71242376	+	protein_coding	GO:0002224|toll-like receptor signaling pathway;GO:0006954|inflammatory response;GO:0045087|innate immune response;	GO:0016020|membrane;	GO:0004888|transmembrane signaling receptor activity;	NA	NA	NA
AABR07039447.1	0	0	0	0	0	0	1	0	0	ENSRNOG00000027972	NA	X	70571854	70572441	-	pseudogene	NA	NA	NA	NA	NA	NA
AABR07039448.1	400	424	423	384	406	383	689	433	655	ENSRNOG00000032807	100359505	X	71304145	71304396	-	protein_coding	GO:0006412|translation;	GO:0005840|ribosome;GO:1990904|ribonucleoprotein complex;	GO:0003735|structural constituent of ribosome;	NA	NA	NA
AABR07039471.1	0	0	0	0	0	0	0	0	0	ENSRNOG00000047231	NA	X	71645180	71646179	-	pseudogene	NA	NA	NA	NA	NA	NA
AABR07039498.1	0	0	0	0	0	0	0	0	0	ENSRNOG00000060786	NA	X	72565321	72566026	+	pseudogene	NA	NA	NA	NA	NA	NA
AABR07039579.1	0	0	0	0	0	2	1	0	0	ENSRNOG00000030519	367869	X	74292911	74307759	-	protein_coding	NA	NA	NA	NA	NA	NA
AABR07039648.1	22	14	16	18	9	14	18	17	43	ENSRNOG00000002789	NA	9	81115177	81116050	-	protein_coding	NA	NA	NA	NA	NA	NA
AABR07039736.1	0	0	0	0	0	0	0	0	0	ENSRNOG00000029497	120099227	X	80048786	80049667	+	protein_coding	NA	NA	GO:0005524|ATP binding;	NA	NA	NA
AABR07039799.1	0	0	0	0	0	0	0	0	0	ENSRNOG00000056042	120099451	X	78651989	78652118	+	snoRNA	NA	NA	NA	NA	NA	NA
AABR07039936.1	0	0	0	0	0	0	0	0	0	ENSRNOG00000037770	NA	X	82134804	82146443	-	protein_coding	NA	NA	NA	NA	NA	NA
AABR07040127.1	2	5	3	2	3	5	8	1	2	ENSRNOG00000053601	685776	X	86932382	86933455	+	protein_coding	GO:0090503|RNA phosphodiester bond hydrolysis, exonucleolytic;	NA	GO:0000175|3'-5'-RNA exonuclease activity;GO:0003676|nucleic acid binding;	NA	NA	NA
AABR07040250.1	0	0	0	0	0	0	0	0	0	ENSRNOG00000051769	120099506	X	89570830	89570959	+	snoRNA	NA	NA	NA	NA	NA	NA
AABR07040251.1	0	0	0	0	0	0	0	0	0	ENSRNOG00000028847	302772	X	89573805	89575838	-	protein_coding	NA	NA	NA	NA	NA	NA
AABR07040266.1	0	0	0	0	0	0	0	0	0	ENSRNOG00000034183	302774	X	89737134	89781886	+	protein_coding	NA	NA	NA	NA	NA	NA
AABR07040332.1	6	1	0	6	5	4	1	6	6	ENSRNOG00000060982	120099454	X	90841390	90841501	+	snoRNA	NA	NA	NA	NA	NA	NA
AABR07040387.1	0	0	0	0	0	0	0	0	0	ENSRNOG00000053191	120099486	X	91718082	91718212	-	snoRNA	NA	NA	NA	NA	NA	NA
AABR07040412.1	120	93	83	107	91	101	54	32	64	ENSRNOG00000057826	317189	X	92395251	93229869	+	protein_coding	GO:0008150|biological_process;GO:0030041|actin filament polymerization;	GO:0005575|cellular_component;GO:0005730|nucleolus;GO:0005783|endoplasmic reticulum;GO:0043231|intracellular membrane-bounded organelle;	GO:0003674|molecular_function;GO:0003779|actin binding;GO:0031267|small GTPase binding;	K05741|diaphanous 2;	rno04810;	Regulation of actin cytoskeleton;
AABR07040463.1	0	0	0	0	0	0	0	0	0	ENSRNOG00000056492	120099490	X	93740259	93740389	-	snoRNA	NA	NA	NA	NA	NA	NA
AABR07040517.1	0	0	0	0	0	0	0	0	0	ENSRNOG00000060856	120099500	X	95671839	95671970	-	snoRNA	NA	NA	NA	NA	NA	NA
AABR07040565.1	0	0	0	0	0	0	0	0	0	ENSRNOG00000037736	NA	X	96717189	96717696	-	protein_coding	NA	NA	NA	NA	NA	NA
AABR07040617.1	0	0	0	0	0	0	0	0	0	ENSRNOG00000043306	680025	X	98689466	98695167	+	protein_coding	NA	GO:0005737|cytoplasm;	NA	K14284|nuclear RNA export factor;K14284|nuclear RNA export factor;K14284|nuclear RNA export factor;K14284|nuclear RNA export factor;K14284|nuclear RNA export factor;K14284|nuclear RNA export factor;	rno03008;rno03013;rno03015;rno05014;rno05164;rno05168;	Ribosome biogenesis in eukaryotes;Nucleocytoplasmic transport;mRNA surveillance pathway;Amyotrophic lateral sclerosis;Influenza A;Herpes simplex virus 1 infection;
AABR07040621.1	0	0	0	0	0	0	0	0	0	ENSRNOG00000057375	120099446	X	98934227	98934367	+	snoRNA	NA	NA	NA	NA	NA	NA
AABR07040622.1	0	0	0	0	0	0	0	0	0	ENSRNOG00000003194	680113	X	98981038	98982064	+	protein_coding	GO:0018095|protein polyglutamylation;	NA	NA	NA	NA	NA
AABR07040624.1	0	0	0	0	0	0	0	0	0	ENSRNOG00000058183	680191	X	99069098	99069337	-	protein_coding	NA	NA	NA	NA	NA	NA
AABR07040686.1	0	0	0	0	0	1	0	1	0	ENSRNOG00000045618	NA	X	100270675	100270878	+	protein_coding	NA	NA	NA	NA	NA	NA
AABR07040695.1	1	1	0	0	0	0	0	1	0	ENSRNOG00000048011	NA	X	100449455	100452147	-	protein_coding	NA	NA	NA	NA	NA	NA
AABR07040789.1	0	0	0	0	0	0	0	0	0	ENSRNOG00000026152	NA	X	102669991	102687769	+	protein_coding	NA	NA	NA	NA	NA	NA
AABR07040792.1	0	0	0	0	0	1	0	0	0	ENSRNOG00000037611	102551064	X	102771710	102773016	+	protein_coding	NA	NA	NA	NA	NA	NA
AABR07040797.1	0	0	0	0	0	0	0	0	0	ENSRNOG00000061692	NA	X	102878958	102931386	-	lncRNA	NA	NA	NA	NA	NA	NA
AABR07040798.1	0	0	1	3	0	0	0	0	0	ENSRNOG00000037610	680619	X	102935525	102941991	+	protein_coding	NA	GO:0016020|membrane;	NA	NA	NA	NA
AABR07040847.1	0	0	0	1	0	0	0	0	0	ENSRNOG00000057593	120099487	X	104501295	104501421	-	snoRNA	NA	NA	NA	NA	NA	NA
AABR07040847.1	0	0	0	1	0	0	0	0	0	ENSRNOG00000058904	680865	X	104490091	104494201	-	protein_coding	NA	NA	NA	NA	NA	NA
AABR07040855.1	280	265	296	273	284	244	295	302	381	ENSRNOG00000051669	116722	X	104656812	104665097	-	protein_coding	GO:0000122|negative regulation of transcription by RNA polymerase II;GO:0006357|regulation of transcription by RNA polymerase II;GO:0006915|apoptotic process;GO:0007253|cytoplasmic sequestering of NF-kappaB;GO:0030307|positive regulation of cell growth;GO:0031398|positive regulation of protein ubiquitination;GO:0032088|negative regulation of NF-kappaB transcription factor activity;GO:0032436|posi…	GO:0000502|proteasome complex;GO:0005634|nucleus;GO:0005737|cytoplasm;GO:0005829|cytosol;GO:0005856|cytoskeleton;GO:0005886|plasma membrane;GO:0043005|neuron projection;GO:0045111|intermediate filament cytoskeleton;	GO:0008092|cytoskeletal protein binding;GO:0030674|protein-macromolecule adaptor activity;GO:0044325|transmembrane transporter binding;GO:0061629|RNA polymerase II-specific DNA-binding transcription factor binding;	NA	NA	NA
AABR07040864.1	538	521	501	528	489	532	216	165	256	ENSRNOG00000050960	678769	X	104665345	104765268	+	protein_coding	GO:0006508|proteolysis;GO:0006629|lipid metabolic process;GO:0006914|autophagy;GO:0008150|biological_process;GO:0015031|protein transport;GO:0051697|protein delipidation;	GO:0005575|cellular_component;GO:0005737|cytoplasm;	GO:0003674|molecular_function;GO:0008234|cysteine-type peptidase activity;GO:0019786|Atg8-specific peptidase activity;	K08342|cysteine protease ATG4 [EC:3.4.22.-];K08342|cysteine protease ATG4 [EC:3.4.22.-];	rno04136;rno04140;	Autophagy - other;Autophagy - animal;
AABR07040887.1	0	0	0	0	0	1	0	0	0	ENSRNOG00000046790	NA	X	105356293	105359985	-	pseudogene	NA	NA	NA	NA	NA	NA
AABR07040892.1	1	2	1	0	0	1	3	0	3	ENSRNOG00000039203	300278	X	105572167	105572751	-	protein_coding	GO:0006412|translation;	NA	NA	NA	NA	NA
AABR07040938.1	19	20	18	16	11	11	11	19	13	ENSRNOG00000005402	NA	X	107587670	107590262	+	pseudogene	NA	NA	NA	NA	NA	NA
AABR07040944.1	1	0	0	0	0	0	0	1	1	ENSRNOG00000005430	NA	X	107697440	107698439	-	protein_coding	NA	NA	NA	NA	NA	NA
AABR07040947.1	549	516	586	545	516	503	393	264	370	ENSRNOG00000011100	120096281	13	65941100	65942227	-	protein_coding	NA	NA	NA	NA	NA	NA
AABR07041039.1	0	0	0	0	0	0	0	0	0	ENSRNOG00000057906	120099466	X	109679057	109679190	+	snRNA	NA	NA	NA	NA	NA	NA
AABR07041089.1	17	12	18	13	17	10	20	17	25	ENSRNOG00000018923	NA	X	111554752	111557411	-	protein_coding	NA	NA	NA	NA	NA	NA
AABR07041109.1	24	12	16	26	25	46	5	37	5	ENSRNOG00000050465	NA	X	111788220	111788672	-	protein_coding	NA	NA	NA	NA	NA	NA
AABR07041140.1	45	30	34	27	54	36	26	22	22	ENSRNOG00000006459	NA	X	113216366	113217655	+	protein_coding	NA	NA	NA	NA	NA	NA
AABR07041141.1	0	0	0	0	0	0	0	0	0	ENSRNOG00000061620	100362376	X	113427440	113427646	-	protein_coding	NA	NA	NA	NA	NA	NA
AABR07041206.1	0	0	0	0	0	0	0	0	0	ENSRNOG00000057692	298331	X	114757066	114815911	-	protein_coding	NA	GO:0005737|cytoplasm;GO:0005925|focal adhesion;	GO:0008270|zinc ion binding;	NA	NA	NA
AABR07041218.1	0	0	0	0	0	0	0	0	0	ENSRNOG00000013698	298326	X	114965767	115005278	+	protein_coding	NA	GO:0005737|cytoplasm;GO:0005925|focal adhesion;	GO:0008270|zinc ion binding;	NA	NA	NA
AABR07041232.1	2	0	1	1	1	3	0	1	1	ENSRNOG00000027837	298320	X	115675427	115725925	-	protein_coding	NA	GO:0001669|acrosomal vesicle;GO:0061832|basal ectoplasmic specialization;	NA	NA	NA	NA
AABR07041234.1	0	0	0	0	0	0	0	0	0	ENSRNOG00000060642	120099452	X	116009779	116009910	+	snoRNA	NA	NA	NA	NA	NA	NA
AABR07041236.1	0	0	0	0	0	0	0	0	0	ENSRNOG00000060546	120099459	X	116020859	116020995	+	snoRNA	NA	NA	NA	NA	NA	NA
AABR07041247.1	0	0	0	0	0	0	0	0	0	ENSRNOG00000030645	363438	X	116789935	116790456	+	protein_coding	GO:0016311|dephosphorylation;	NA	GO:0016791|phosphatase activity;	NA	NA	NA
AABR07041247.2	0	0	0	0	0	0	0	0	0	ENSRNOG00000032390	298349	X	116749715	116754717	-	protein_coding	NA	NA	NA	NA	NA	NA
AABR07041297.1	0	0	0	0	0	0	0	0	0	ENSRNOG00000054644	120099455	X	117874309	117874425	+	snoRNA	NA	NA	NA	NA	NA	NA
AABR07041403.1	0	0	0	0	0	0	0	0	0	ENSRNOG00000057469	NA	X	121358795	121361675	+	protein_coding	NA	NA	NA	NA	NA	NA
AABR07041600.1	1	1	1	0	1	0	2	3	1	ENSRNOG00000003734	681300	X	126891293	126892210	+	protein_coding	NA	GO:0005737|cytoplasm;	GO:0008270|zinc ion binding;	NA	NA	NA
AABR07041632.1	0	0	0	0	0	0	0	0	0	ENSRNOG00000059253	120099519	X	127999183	127999303	+	snoRNA	NA	NA	NA	NA	NA	NA
AABR07041778.1	280	234	289	225	232	202	894	794	1411	ENSRNOG00000034150	501644	X	131765916	131766839	-	protein_coding	GO:0006826|iron ion transport;	NA	NA	NA	NA	NA
AABR07041972.1	0	0	0	0	0	0	0	0	0	ENSRNOG00000058507	NA	X	139679280	139680393	+	protein_coding	NA	NA	NA	NA	NA	NA
AABR07041997.1	0	0	0	0	0	0	0	0	0	ENSRNOG00000026227	NA	X	140818861	140819638	+	protein_coding	NA	NA	NA	NA	NA	NA
AABR07042071.1	0	0	0	0	0	0	0	0	0	ENSRNOG00000046097	NA	X	142600183	142600802	-	protein_coding	NA	NA	NA	NA	NA	NA
AABR07042226.1	0	0	0	0	0	0	0	0	0	ENSRNOG00000058521	NA	X	144806986	144812552	-	protein_coding	NA	NA	NA	NA	NA	NA
AABR07042292.1	0	0	0	0	0	0	0	0	0	ENSRNOG00000055514	120099512	X	146092924	146093007	-	snoRNA	NA	NA	NA	NA	NA	NA
AABR07042293.1	0	0	0	0	0	0	0	0	0	ENSRNOG00000037381	NA	X	146126504	146127226	-	protein_coding	NA	NA	NA	NA	NA	NA
AABR07042293.2	0	0	0	0	0	0	0	0	0	ENSRNOG00000061191	120099527	X	146115931	146116052	-	snRNA	NA	NA	NA	NA	NA	NA
AABR07042302.1	0	2	0	0	0	0	0	0	0	ENSRNOG00000057365	NA	X	150066064	150066148	-	miRNA	NA	NA	NA	NA	NA	NA
AABR07042323.1	0	0	0	0	0	0	0	0	0	ENSRNOG00000005681	363514	X	150624087	150624473	-	protein_coding	NA	GO:0005730|nucleolus;	NA	NA	NA	NA
AABR07042326.2	0	0	0	0	0	0	2	1	0	ENSRNOG00000060421	103694523	X	150732952	150733203	+	protein_coding	NA	NA	NA	NA	NA	NA
AABR07042385.1	0	0	0	0	0	0	0	0	0	ENSRNOG00000047872	NA	X	96057	96610	-	pseudogene	NA	NA	NA	NA	NA	NA
AABR07042392.1	0	0	0	0	0	0	0	0	0	ENSRNOG00000053117	120099504	X	147121405	147121505	+	snoRNA	NA	NA	NA	NA	NA	NA
AABR07042418.1	0	0	0	0	0	0	0	0	0	ENSRNOG00000051726	108353273	X	146589419	146591666	-	protein_coding	NA	NA	NA	NA	NA	NA
AABR07042471.1	0	0	0	0	0	0	0	0	0	ENSRNOG00000058089	120099290	X	133232852	133233034	+	protein_coding	NA	NA	NA	NA	NA	NA
AABR07042565.1	0	0	0	0	0	0	0	0	0	ENSRNOG00000052151	291814	19	99434	115117	-	protein_coding	NA	NA	GO:0016787|hydrolase activity;	NA	NA	NA
AABR07042633.1	0	0	0	0	1	0	1	0	0	ENSRNOG00000049312	120098582	19	22799994	22804744	+	protein_coding	NA	NA	NA	NA	NA	NA
AABR07042654.2	0	0	0	0	0	0	0	0	0	ENSRNOG00000060758	NA	19	1320987	1334515	-	lncRNA	NA	NA	NA	NA	NA	NA
AABR07042668.2	0	0	0	0	0	0	0	0	0	ENSRNOG00000058366	120098681	19	2211733	2211861	+	snoRNA	NA	NA	NA	NA	NA	NA
AABR07042669.1	0	0	0	0	0	0	0	0	0	ENSRNOG00000031076	291827	19	2365804	2366283	-	protein_coding	NA	NA	NA	NA	NA	NA
AABR07042690.1	0	0	0	0	0	0	0	0	0	ENSRNOG00000054933	120098699	19	3457463	3457591	+	snoRNA	NA	NA	NA	NA	NA	NA
AABR07042733.2	0	0	0	0	0	0	0	0	0	ENSRNOG00000060024	NA	19	5488751	5493897	-	protein_coding	NA	NA	NA	NA	NA	NA
AABR07042734.1	0	0	0	0	0	0	0	0	0	ENSRNOG00000060593	120098685	19	5552602	5552687	-	snoRNA	NA	NA	NA	NA	NA	NA
AABR07042789.1	0	0	0	0	0	0	0	0	0	ENSRNOG00000023805	502186	19	8335702	8335905	-	protein_coding	NA	NA	GO:0003677|DNA binding;	NA	NA	NA
AABR07042792.1	0	0	0	0	0	0	0	0	0	ENSRNOG00000059462	120098691	19	8704587	8704719	+	snoRNA	NA	NA	NA	NA	NA	NA
AABR07042859.1	0	0	0	0	0	0	0	0	0	ENSRNOG00000057392	NA	19	22663956	22665068	+	processed_pseudogene	NA	NA	NA	NA	NA	NA
AABR07042866.1	4	3	1	3	5	4	1	2	4	ENSRNOG00000013826	NA	19	12077434	12078376	-	pseudogene	NA	NA	NA	NA	NA	NA
AABR07042875.1	0	0	0	0	0	0	0	0	0	ENSRNOG00000013839	103694291	19	12396026	12396454	+	protein_coding	GO:0000387|spliceosomal snRNP assembly;	GO:0005681|spliceosomal complex;GO:0005829|cytosol;	NA	NA	NA	NA
AABR07042891.2	0	0	0	0	0	0	0	0	0	ENSRNOG00000052072	120098697	19	13026406	13026533	+	snoRNA	NA	NA	NA	NA	NA	NA
AABR07042892.1	0	0	0	0	0	0	0	0	0	ENSRNOG00000033451	307665	19	13107145	13107603	+	protein_coding	GO:0006412|translation;	NA	GO:0003723|RNA binding;GO:0003735|structural constituent of ribosome;	NA	NA	NA
AABR07042903.1	17	20	24	18	12	15	8	19	27	ENSRNOG00000030174	NA	19	13358116	13359003	+	pseudogene	NA	NA	NA	NA	NA	NA
AABR07042915.1	25	30	37	31	41	43	35	23	33	ENSRNOG00000032666	498914	19	13684080	13684409	-	protein_coding	GO:0048208|COPII vesicle coating;GO:0099022|vesicle tethering;	GO:0005783|endoplasmic reticulum;GO:0048471|perinuclear region of cytoplasm;GO:1990071|TRAPPII protein complex;GO:1990072|TRAPPIII protein complex;	NA	NA	NA	NA
AABR07043013.1	0	0	0	0	0	0	0	0	0	ENSRNOG00000053426	120098695	19	15934312	15934444	+	snoRNA	NA	NA	NA	NA	NA	NA
AABR07043101.1	0	0	0	0	0	0	0	0	0	ENSRNOG00000055046	680996	19	20053953	20054336	+	protein_coding	GO:0006412|translation;	NA	NA	NA	NA	NA
AABR07043103.1	0	0	0	0	0	0	0	0	0	ENSRNOG00000058155	120098692	19	20130725	20130852	+	snoRNA	NA	NA	NA	NA	NA	NA
AABR07043114.1	0	0	0	0	0	0	0	0	0	ENSRNOG00000055195	120098690	19	20884868	20884995	-	snoRNA	NA	NA	NA	NA	NA	NA
AABR07043115.1	0	0	0	0	0	0	1	0	0	ENSRNOG00000047294	NA	19	22522097	22530871	-	protein_coding	NA	NA	NA	NA	NA	NA
AABR07043141.1	0	0	0	0	0	0	0	0	0	ENSRNOG00000033819	688712	19	25420913	25421281	-	protein_coding	NA	GO:0005840|ribosome;GO:1990904|ribonucleoprotein complex;	NA	NA	NA	NA
AABR07043167.1	0	1	0	0	0	0	0	0	0	ENSRNOG00000039252	NA	19	24209644	24210974	+	protein_coding	NA	NA	NA	NA	NA	NA
AABR07043347.1	0	0	0	0	0	0	0	0	0	ENSRNOG00000051410	NA	17	3606222	3607319	+	protein_coding	NA	NA	NA	NA	NA	NA
AABR07043389.1	0	1	1	0	0	0	2	0	0	ENSRNOG00000052109	NA	19	13741284	13768111	+	lncRNA	NA	NA	NA	NA	NA	NA
AABR07043429.1	0	0	0	0	0	0	0	0	0	ENSRNOG00000049890	NA	19	272295	275018	-	protein_coding	NA	NA	NA	NA	NA	NA
AABR07043525.1	0	0	0	0	0	0	0	0	0	ENSRNOG00000055482	NA	19	242944	258037	+	lncRNA	NA	NA	NA	NA	NA	NA
AABR07043557.1	0	0	0	0	0	0	0	0	0	ENSRNOG00000033226	NA	19	22481952	22483036	-	protein_coding	NA	NA	NA	NA	NA	NA
AABR07043598.1	0	0	0	0	0	0	0	0	0	ENSRNOG00000028320	NA	19	26923419	26924420	-	protein_coding	NA	NA	NA	NA	NA	NA
AABR07043626.1	0	0	0	0	0	0	0	0	0	ENSRNOG00000033487	102550668	19	29456838	29457305	+	protein_coding	GO:0006412|translation;	NA	NA	NA	NA	NA
AABR07043654.1	0	0	0	0	1	0	0	2	0	ENSRNOG00000027022	NA	19	30511967	30513186	-	protein_coding	NA	NA	NA	NA	NA	NA
AABR07043658.1	0	0	0	0	0	0	0	0	0	ENSRNOG00000054720	120098703	19	30823632	30823744	+	snoRNA	NA	NA	NA	NA	NA	NA
AABR07043659.1	0	0	0	0	0	0	0	0	0	ENSRNOG00000029317	688462	19	30916304	30916801	+	protein_coding	GO:0006412|translation;	NA	NA	NA	NA	NA
AABR07043676.1	0	0	0	0	0	0	0	0	0	ENSRNOG00000054981	120098694	19	31927710	31927841	+	snoRNA	NA	NA	NA	NA	NA	NA
AABR07043711.1	0	1	0	0	1	0	0	0	1	ENSRNOG00000060858	NA	19	13739870	13762974	-	lncRNA	NA	NA	NA	NA	NA	NA
AABR07043813.1	1	0	0	0	1	1	0	1	0	ENSRNOG00000033224	120098629	19	39470811	39471281	+	protein_coding	GO:0006412|translation;	GO:0005840|ribosome;GO:1990904|ribonucleoprotein complex;	GO:0003735|structural constituent of ribosome;	NA	NA	NA
AABR07043818.1	0	0	0	0	0	0	0	0	0	ENSRNOG00000038741	100910419	19	38072845	38084645	+	protein_coding	GO:0006355|regulation of DNA-templated transcription;GO:0045892|negative regulation of DNA-templated transcription;	GO:0005634|nucleus;	NA	K04497|groucho;K04497|groucho;	rno04310;rno04330;	Wnt signaling pathway;Notch signaling pathway;
AABR07043846.1	0	0	0	0	0	0	0	0	0	ENSRNOG00000061325	120098689	19	39379220	39379349	+	snoRNA	NA	NA	NA	NA	NA	NA
AABR07043887.1	0	0	0	0	0	0	0	0	0	ENSRNOG00000052933	120098705	19	41690023	41690140	-	snoRNA	NA	NA	NA	NA	NA	NA
AABR07043977.1	0	0	0	0	0	0	0	0	0	ENSRNOG00000055087	120098686	19	46184351	46184483	+	snoRNA	NA	NA	NA	NA	NA	NA
AABR07043987.1	0	0	0	0	0	0	0	0	0	ENSRNOG00000056152	120098700	19	46795577	46795708	+	snoRNA	NA	NA	NA	NA	NA	NA
AABR07044001.2	0	0	0	0	0	0	0	0	0	ENSRNOG00000055320	NA	19	47471799	47476832	+	lncRNA	NA	NA	NA	NA	NA	NA
AABR07044065.1	0	0	0	0	0	0	0	0	0	ENSRNOG00000028578	NA	19	50114362	50114880	-	protein_coding	NA	NA	NA	NA	NA	NA
AABR07044111.1	0	0	0	0	0	0	0	0	0	ENSRNOG00000038057	NA	19	53552998	53553432	+	protein_coding	NA	NA	NA	NA	NA	NA
AABR07044183.1	0	0	0	0	0	0	0	0	0	ENSRNOG00000052853	120098696	19	56786343	56786473	+	snoRNA	NA	NA	NA	NA	NA	NA
AABR07044199.1	0	0	0	0	0	0	0	0	0	ENSRNOG00000057394	120098698	19	57136671	57136791	+	snoRNA	NA	NA	NA	NA	NA	NA
AABR07044273.2	0	0	0	0	0	0	0	0	0	ENSRNOG00000052698	120099023	20	727129	727259	-	snoRNA	NA	NA	NA	NA	NA	NA
AABR07044301.1	0	0	0	0	0	0	0	0	0	ENSRNOG00000045658	NA	20	1407866	1408970	+	protein_coding	NA	NA	NA	NA	NA	NA
AABR07044308.1	0	0	0	0	0	0	1	0	0	ENSRNOG00000042370	NA	20	1789779	1793115	-	protein_coding	NA	NA	NA	NA	NA	NA
AABR07044308.2	1	0	1	0	4	0	0	0	0	ENSRNOG00000051398	NA	20	1768641	1772357	-	protein_coding	NA	NA	NA	NA	NA	NA
AABR07044362.1	0	0	0	0	0	0	0	0	0	ENSRNOG00000026051	NA	20	2630622	2634751	+	protein_coding	NA	NA	NA	NA	NA	NA
AABR07044373.1	0	0	0	0	0	0	0	0	0	ENSRNOG00000030676	502412	20	3172330	3173886	-	protein_coding	GO:0030198|extracellular matrix organization;	GO:0005614|interstitial matrix;GO:0031012|extracellular matrix;	GO:0001968|fibronectin binding;GO:0005518|collagen binding;GO:0005539|glycosaminoglycan binding;GO:0005540|hyaluronic acid binding;GO:0008201|heparin binding;GO:0043236|laminin binding;GO:0070052|collagen V binding;	NA	NA	NA
AABR07044375.1	97	98	88	102	69	88	116	87	67	ENSRNOG00000050215	682408	20	3179438	3184250	-	protein_coding	GO:0003336|corneocyte desquamation;GO:0008150|biological_process;GO:0043589|skin morphogenesis;GO:0098609|cell-cell adhesion;GO:1905716|negative regulation of cornification;GO:1990000|amyloid fibril formation;	GO:0001533|cornified envelope;GO:0005576|extracellular region;GO:0005737|cytoplasm;GO:0030057|desmosome;	GO:0003674|molecular_function;GO:0042803|protein homodimerization activity;	NA	NA	NA
AABR07044383.1	0	0	2	1	0	0	59	46	52	ENSRNOG00000059770	NA	20	3403777	3436874	-	protein_coding	NA	NA	NA	NA	NA	NA
AABR07044388.2	0	0	2	1	1	2	23	12	11	ENSRNOG00000033581	NA	20	4026463	4085578	-	protein_coding	NA	NA	NA	NA	NA	NA
AABR07044388.4	0	0	0	0	0	0	0	0	0	ENSRNOG00000052710	NA	20	4338257	4339485	+	protein_coding	NA	NA	NA	NA	NA	NA
AABR07044397.1	0	0	0	0	0	0	0	0	0	ENSRNOG00000050998	NA	20	2496605	2497428	-	protein_coding	NA	NA	NA	NA	NA	NA
AABR07044408.3	1	1	1	1	1	2	25	37	11	ENSRNOG00000058987	NA	20	3481751	3490548	-	lncRNA	NA	NA	NA	NA	NA	NA
AABR07044416.1	0	0	0	0	0	0	0	0	0	ENSRNOG00000045908	24986	20	4760118	4770244	-	protein_coding	GO:0002250|adaptive immune response;GO:0002381|immunoglobulin production involved in immunoglobulin-mediated immune response;GO:0002503|peptide antigen assembly with MHC class II protein complex;GO:0019886|antigen processing and presentation of exogenous peptide antigen via MHC class II;GO:0032729|positive regulation of type II interferon production;GO:0042102|positive regulation of T cell prolif…	GO:0009986|cell surface;GO:0042613|MHC class II protein complex;GO:0043231|intracellular membrane-bounded organelle;	GO:0023026|MHC class II protein complex binding;GO:0042605|peptide antigen binding;	K06752|MHC class II antigen;K06752|MHC class II antigen;K06752|MHC class II antigen;K06752|MHC class II antigen;K06752|MHC class II antigen;K06752|MHC class II antigen;K06752|MHC class II antigen;K06752|MHC class II antigen;K06752|MHC class II antigen;K06752|MHC class II antigen;K06752|MHC class II antigen;K06752|MHC class II antigen;K06752|MHC class II antigen;K06752|MHC class II antigen;K06752|…	rno04145;rno04514;rno04612;rno04640;rno04658;rno04659;rno04672;rno04940;rno05140;rno05145;rno05150;rno05152;rno05164;rno05166;rno05168;rno05169;rno05310;rno05320;rno05321;rno05322;rno05323;rno05330;rno05332;rno05416;	Phagosome;Cell adhesion molecules;Antigen processing and presentation;Hematopoietic cell lineage;Th1 and Th2 cell differentiation;Th17 cell differentiation;Intestinal immune network for IgA production;Type I diabetes mellitus;Leishmaniasis;Toxoplasmosis;Staphylococcus aureus infection;Tuberculosis;Influenza A;Human T-cell leukemia virus 1 infection;Herpes simplex virus 1 infection;Epstein-Barr vi…
AABR07044447.1	0	0	0	0	0	0	0	0	0	ENSRNOG00000057209	120099031	20	7106459	7106619	-	scaRNA	NA	NA	NA	NA	NA	NA
AABR07044460.2	0	1	2	0	4	4	0	0	0	ENSRNOG00000062206	NA	20	5319032	5330109	+	lncRNA	NA	NA	NA	NA	NA	NA
AABR07044473.1	0	0	0	0	0	0	0	0	1	ENSRNOG00000046314	NA	20	7397861	7399143	+	pseudogene	NA	NA	NA	NA	NA	NA
AABR07044484.1	1	0	0	0	0	0	0	1	1	ENSRNOG00000058535	120099029	20	5916482	5916607	-	snoRNA	NA	NA	NA	NA	NA	NA
AABR07044535.1	0	0	0	0	0	0	0	0	0	ENSRNOG00000061642	120099070	20	9248042	9248157	-	snoRNA	NA	NA	NA	NA	NA	NA
AABR07044570.2	9	3	7	7	1	2	1	6	5	ENSRNOG00000051612	NA	20	9998462	10017295	+	lncRNA	NA	NA	NA	NA	NA	NA
AABR07044580.2	0	0	0	0	0	0	0	0	0	ENSRNOG00000057911	120099063	20	10748390	10748486	+	snoRNA	NA	NA	NA	NA	NA	NA
AABR07044583.1	0	0	0	0	0	0	0	0	0	ENSRNOG00000001218	100365646	20	10799355	10800215	-	protein_coding	NA	GO:0045095|keratin filament;	GO:0042802|identical protein binding;	NA	NA	NA
AABR07044583.2	0	0	0	0	0	0	0	0	0	ENSRNOG00000042329	120098855	20	10840914	10841681	-	protein_coding	NA	GO:0045095|keratin filament;	NA	NA	NA	NA
AABR07044593.1	1	5	2	2	1	4	2	2	2	ENSRNOG00000001226	690520	20	11179488	11179919	-	protein_coding	GO:0006165|nucleoside diphosphate phosphorylation;GO:0006183|GTP biosynthetic process;GO:0006228|UTP biosynthetic process;GO:0006241|CTP biosynthetic process;	NA	GO:0004550|nucleoside diphosphate kinase activity;GO:0005524|ATP binding;	NA	NA	NA
AABR07044593.2	0	0	0	0	0	1	0	0	0	ENSRNOG00000056879	120099069	20	11185082	11185194	-	snoRNA	NA	NA	NA	NA	NA	NA
AABR07044631.2	25	17	32	30	18	22	22	12	21	ENSRNOG00000062276	29566	20	13043257	13071450	-	protein_coding	GO:0006508|proteolysis;GO:0006520|amino acid metabolic process;GO:0006631|fatty acid metabolic process;GO:0006750|glutathione biosynthetic process;GO:0006751|glutathione catabolic process;GO:0006954|inflammatory response;GO:0006979|response to oxidative stress;GO:0010243|response to organonitrogen compound;GO:1901750|leukotriene D4 biosynthetic process;	GO:0005575|cellular_component;GO:0005886|plasma membrane;	GO:0000048|peptidyltransferase activity;GO:0002951|leukotriene-C(4) hydrolase;GO:0003674|molecular_function;GO:0016740|transferase activity;GO:0036374|glutathione hydrolase activity;GO:0102953|hypoglycin A gamma-glutamyl transpeptidase activity;GO:0103068|leukotriene C4 gamma-glutamyl transferase activity;	K18592|gamma-glutamyltranspeptidase / glutathione hydrolase / leukotriene-C4 hydrolase [EC:2.3.2.2 3.4.19.13 3.4.19.14];K18592|gamma-glutamyltranspeptidase / glutathione hydrolase / leukotriene-C4 hydrolase [EC:2.3.2.2 3.4.19.13 3.4.19.14];K18592|gamma-glutamyltranspeptidase / glutathione hydrolase / leukotriene-C4 hydrolase [EC:2.3.2.2 3.4.19.13 3.4.19.14];K18592|gamma-glutamyltranspeptidase / g…	rno00430;rno00480;rno00590;rno01100;	Taurine and hypotaurine metabolism;Glutathione metabolism;Arachidonic acid metabolism;Metabolic pathways;
AABR07044685.1	0	0	0	0	0	0	0	0	0	ENSRNOG00000053958	120099019	20	16096335	16096464	-	snoRNA	NA	NA	NA	NA	NA	NA
AABR07044703.1	0	0	0	0	0	0	0	0	0	ENSRNOG00000056074	120099024	20	16718702	16718825	-	snoRNA	NA	NA	NA	NA	NA	NA
AABR07044711.1	1451	1607	1021	1076	1811	780	5580	4249	5331	ENSRNOG00000047276	100362738	16	70838568	70840795	+	protein_coding	GO:0006096|glycolytic process;	NA	GO:0000287|magnesium ion binding;GO:0005524|ATP binding;GO:0016301|kinase activity;GO:0030955|potassium ion binding;	NA	NA	NA
AABR07044714.1	0	0	0	0	0	0	0	0	0	ENSRNOG00000053936	NA	20	16974380	16975074	+	protein_coding	NA	NA	NA	NA	NA	NA
AABR07044759.1	28	32	39	29	34	35	22	25	45	ENSRNOG00000049063	687808	20	18335862	18377022	-	protein_coding	GO:0015881|creatine transmembrane transport;GO:0046415|urate metabolic process;GO:1902603|carnitine transmembrane transport;	GO:0005886|plasma membrane;	GO:0005308|creatine transmembrane transporter activity;GO:0015226|carnitine transmembrane transporter activity;	NA	NA	NA
AABR07044777.1	0	0	0	0	0	0	0	0	1	ENSRNOG00000061849	120099030	20	18740764	18740835	-	snoRNA	NA	NA	NA	NA	NA	NA
AABR07044783.1	0	0	0	0	0	0	0	0	0	ENSRNOG00000000630	294368	20	19216154	19216675	+	protein_coding	NA	NA	NA	NA	NA	NA
AABR07044790.1	0	0	0	0	0	0	0	0	0	ENSRNOG00000055815	120099068	20	19472404	19472532	-	snoRNA	NA	NA	NA	NA	NA	NA
AABR07044804.1	0	0	0	0	0	0	0	0	0	ENSRNOG00000054048	NA	20	19932457	19939788	-	lncRNA	NA	NA	NA	NA	NA	NA
AABR07044805.2	0	0	0	0	0	0	0	0	0	ENSRNOG00000056976	NA	20	19939884	19983293	+	lncRNA	NA	NA	NA	NA	NA	NA
AABR07044850.2	0	0	0	0	0	0	0	0	0	ENSRNOG00000059658	120099080	20	22097051	22097182	-	snoRNA	NA	NA	NA	NA	NA	NA
AABR07044900.1	0	1	1	1	0	0	0	0	0	ENSRNOG00000000373	361839	20	23623560	25199978	-	protein_coding	GO:0086073|bundle of His cell-Purkinje myocyte adhesion involved in cell communication;GO:0086091|regulation of heart rate by cardiac conduction;GO:0098609|cell-cell adhesion;GO:0098911|regulation of ventricular cardiac muscle cell action potential;	GO:0005737|cytoplasm;GO:0005856|cytoskeleton;GO:0005912|adherens junction;GO:0005916|fascia adherens;GO:0030027|lamellipodium;	GO:0008013|beta-catenin binding;GO:0045296|cadherin binding;GO:0051015|actin filament binding;	K05691|catenin alpha;K05691|catenin alpha;K05691|catenin alpha;K05691|catenin alpha;K05691|catenin alpha;K05691|catenin alpha;K05691|catenin alpha;K05691|catenin alpha;	rno04390;rno04520;rno04670;rno05100;rno05200;rno05213;rno05226;rno05412;	Hippo signaling pathway;Adherens junction;Leukocyte transendothelial migration;Bacterial invasion of epithelial cells;Pathways in cancer;Endometrial cancer;Gastric cancer;Arrhythmogenic right ventricular cardiomyopathy;
AABR07044940.1	2	1	0	1	0	2	0	2	0	ENSRNOG00000051063	103694416	20	25754169	25754577	+	protein_coding	NA	NA	NA	NA	NA	NA
AABR07044952.2	0	0	0	0	0	0	0	0	0	ENSRNOG00000058631	120099059	20	26346819	26346887	-	snoRNA	NA	NA	NA	NA	NA	NA
AABR07044959.1	0	0	0	0	0	0	0	0	0	ENSRNOG00000056298	NA	20	26764350	26764912	-	pseudogene	NA	NA	NA	NA	NA	NA
AABR07044977.1	0	0	0	0	0	0	0	0	0	ENSRNOG00000048535	503340	20	27663838	27664134	-	protein_coding	NA	NA	GO:0008289|lipid binding;	NA	NA	NA
AABR07044977.2	0	0	0	0	0	0	0	0	0	ENSRNOG00000061550	120099016	20	27649689	27649816	-	snoRNA	NA	NA	NA	NA	NA	NA
AABR07045032.1	6	6	2	6	1	8	3	3	6	ENSRNOG00000049045	100364027	20	30335628	30373867	-	protein_coding	GO:0001678|intracellular glucose homeostasis;GO:0006096|glycolytic process;GO:0051156|glucose 6-phosphate metabolic process;	GO:0001917|photoreceptor inner segment;GO:0005737|cytoplasm;GO:0005739|mitochondrion;	GO:0004340|glucokinase activity;GO:0005524|ATP binding;GO:0005536|glucose binding;	K00844|hexokinase [EC:2.7.1.1];K00844|hexokinase [EC:2.7.1.1];K00844|hexokinase [EC:2.7.1.1];K00844|hexokinase [EC:2.7.1.1];K00844|hexokinase [EC:2.7.1.1];K00844|hexokinase [EC:2.7.1.1];K00844|hexokinase [EC:2.7.1.1];K00844|hexokinase [EC:2.7.1.1];K00844|hexokinase [EC:2.7.1.1];K00844|hexokinase [EC:2.7.1.1];K00844|hexokinase [EC:2.7.1.1];K00844|hexokinase [EC:2.7.1.1];K00844|hexokinase [EC:2.7.1…	rno00010;rno00051;rno00052;rno00500;rno00520;rno00524;rno01100;rno01200;rno01250;rno04066;rno04910;rno04930;rno04973;rno05230;	Glycolysis / Gluconeogenesis;Fructose and mannose metabolism;Galactose metabolism;Starch and sucrose metabolism;Amino sugar and nucleotide sugar metabolism;Neomycin, kanamycin and gentamicin biosynthesis;Metabolic pathways;Carbon metabolism;Biosynthesis of nucleotide sugars;HIF-1 signaling pathway;Insulin signaling pathway;Type II diabetes mellitus;Carbohydrate digestion and absorption;Central ca…
AABR07045048.1	0	0	0	0	0	0	0	0	0	ENSRNOG00000054004	120099018	20	31228160	31228292	+	snoRNA	NA	NA	NA	NA	NA	NA
AABR07045058.1	18	17	11	12	7	8	4	9	11	ENSRNOG00000033891	100911055	20	31505701	31507171	+	protein_coding	NA	NA	NA	NA	NA	NA
AABR07045135.1	0	0	0	0	0	0	4	4	1	ENSRNOG00000060741	120099028	20	32992993	32993113	+	snoRNA	NA	NA	NA	NA	NA	NA
AABR07045163.1	0	0	0	0	0	0	0	0	0	ENSRNOG00000054443	120099027	20	34684757	34684858	+	snoRNA	NA	NA	NA	NA	NA	NA
AABR07045251.1	0	0	0	0	0	0	0	0	0	ENSRNOG00000052404	120099026	20	38973682	38973796	-	snoRNA	NA	NA	NA	NA	NA	NA
AABR07045303.1	0	0	0	0	0	0	0	0	0	ENSRNOG00000052780	120099067	20	38743381	38743516	+	snoRNA	NA	NA	NA	NA	NA	NA
AABR07045321.1	0	0	0	0	1	0	2	0	0	ENSRNOG00000033652	NA	20	40814078	40814928	-	protein_coding	NA	NA	NA	NA	NA	NA
AABR07045322.1	644	505	568	477	465	477	833	745	1022	ENSRNOG00000025179	100361061	20	40513536	40513949	-	processed_pseudogene	NA	NA	NA	NA	NA	NA
AABR07045334.1	0	0	0	0	0	0	0	0	0	ENSRNOG00000052532	NA	20	41851455	41854519	+	lncRNA	NA	NA	NA	NA	NA	NA
AABR07045337.1	0	0	0	0	0	0	0	0	0	ENSRNOG00000032548	120098890	20	41909761	41932712	+	protein_coding	NA	NA	NA	NA	NA	NA
AABR07045339.1	0	0	0	0	0	0	0	0	0	ENSRNOG00000052210	120099020	20	42129317	42129446	+	snoRNA	NA	NA	NA	NA	NA	NA
AABR07045341.1	0	0	0	0	0	0	0	0	0	ENSRNOG00000058648	NA	20	42257451	42260249	-	protein_coding	NA	NA	NA	NA	NA	NA
AABR07045354.1	0	0	0	0	0	1	0	0	0	ENSRNOG00000055951	120099035	20	43148126	43148232	+	snRNA	NA	NA	NA	NA	NA	NA
AABR07045370.1	0	0	0	0	1	0	0	0	0	ENSRNOG00000056426	120099060	20	43610465	43610598	-	snoRNA	NA	NA	NA	NA	NA	NA
AABR07045373.1	1	0	1	0	0	0	3	2	0	ENSRNOG00000016336	680460	2	221965149	221966576	+	protein_coding	GO:0006351|DNA-templated transcription;GO:0045893|positive regulation of DNA-templated transcription;	GO:0005634|nucleus;	GO:0003677|DNA binding;GO:0003723|RNA binding;	NA	NA	NA
AABR07045373.2	1	0	2	3	0	1	3	1	0	ENSRNOG00000054099	120099071	20	43655201	43655333	-	snoRNA	NA	NA	NA	NA	NA	NA
AABR07045391.2	0	0	0	0	0	0	1	0	0	ENSRNOG00000058368	120099022	20	44625322	44625455	+	snoRNA	NA	NA	NA	NA	NA	NA
AABR07045399.1	3	0	0	1	0	0	1	1	1	ENSRNOG00000054538	NA	20	44943418	44946671	+	lncRNA	NA	NA	NA	NA	NA	NA
AABR07045411.1	0	0	0	0	0	0	0	0	0	ENSRNOG00000049990	499469	20	45340367	45352220	+	protein_coding	NA	NA	NA	NA	NA	NA
AABR07045431.1	38	47	55	39	44	33	48	48	63	ENSRNOG00000043033	502479	20	45798349	45967906	-	protein_coding	GO:0006123|mitochondrial electron transport, cytochrome c to oxygen;GO:0007005|mitochondrion organization;GO:0035694|mitochondrial protein catabolic process;	GO:0005737|cytoplasm;GO:0005739|mitochondrion;GO:0031966|mitochondrial membrane;	GO:0005524|ATP binding;GO:0016887|ATP hydrolysis activity;	NA	NA	NA
AABR07045454.1	1	0	0	0	0	0	0	0	0	ENSRNOG00000032964	294530	20	46958335	46958664	+	protein_coding	GO:0006412|translation;	GO:0022625|cytosolic large ribosomal subunit;	GO:0003735|structural constituent of ribosome;	NA	NA	NA
AABR07045462.1	0	0	0	0	0	0	0	0	0	ENSRNOG00000000320	NA	20	47048674	47048964	-	protein_coding	NA	NA	NA	NA	NA	NA
AABR07045487.1	0	0	0	0	0	0	0	0	0	ENSRNOG00000037628	NA	20	47477753	47478331	+	protein_coding	NA	NA	NA	NA	NA	NA
AABR07045523.2	0	0	0	0	0	0	0	0	0	ENSRNOG00000053612	120099073	20	48748586	48748712	+	snoRNA	NA	NA	NA	NA	NA	NA
AABR07045570.1	0	0	1	0	0	0	0	0	0	ENSRNOG00000051473	120099079	20	50078692	50078824	-	snoRNA	NA	NA	NA	NA	NA	NA
AABR07045621.1	0	0	0	0	0	0	0	0	0	ENSRNOG00000049150	NA	20	52127538	52129342	-	protein_coding	NA	NA	NA	NA	NA	NA
AABR07046657.1	36	34	39	31	41	21	26	19	25	ENSRNOG00000022709	NA	5	1451326	1453094	-	protein_coding	NA	NA	NA	NA	NA	NA
AABR07046669.2	0	0	0	0	0	0	0	0	0	ENSRNOG00000052679	120103323	5	2159473	2159603	+	snoRNA	NA	NA	NA	NA	NA	NA
AABR07046707.1	411	387	400	331	400	376	305	351	413	ENSRNOG00000042458	171500	5	2840765	3084929	+	protein_coding	GO:0010468|regulation of gene expression;GO:0032956|regulation of actin cytoskeleton organization;GO:0034599|cellular response to oxidative stress;GO:0035418|protein localization to synapse;GO:0048592|eye morphogenesis;GO:0051489|regulation of filopodium assembly;GO:0051965|positive regulation of synapse assembly;GO:0061003|positive regulation of dendritic spine morphogenesis;GO:0098964|anterogra…	GO:0005634|nucleus;GO:0005730|nucleolus;GO:0005737|cytoplasm;GO:0005783|endoplasmic reticulum;GO:0005874|microtubule;GO:0010494|cytoplasmic stress granule;GO:0030424|axon;GO:0030425|dendrite;GO:0031965|nuclear membrane;GO:0032839|dendrite cytoplasm;GO:0043025|neuronal cell body;GO:0043198|dendritic shaft;GO:1990124|messenger ribonucleoprotein complex;	GO:0003723|RNA binding;GO:0003725|double-stranded RNA binding;GO:0005515|protein binding;GO:0019894|kinesin binding;GO:0030544|Hsp70 protein binding;GO:0043022|ribosome binding;GO:0051019|mitogen-activated protein kinase binding;	NA	NA	NA
AABR07046727.1	0	0	0	0	0	0	0	0	0	ENSRNOG00000058595	120103310	5	4281702	4281825	+	snoRNA	NA	NA	NA	NA	NA	NA
AABR07046762.1	0	3	1	1	2	1	0	1	0	ENSRNOG00000053278	120103350	5	5833469	5833590	+	snoRNA	NA	NA	NA	NA	NA	NA
AABR07046763.1	0	0	0	1	0	0	0	0	0	ENSRNOG00000059973	NA	5	6060790	6062128	-	protein_coding	NA	NA	NA	NA	NA	NA
AABR07046956.1	0	0	0	0	0	0	0	0	0	ENSRNOG00000040219	NA	5	12551860	12552204	+	protein_coding	NA	NA	NA	NA	NA	NA
AABR07046970.1	0	0	0	0	0	0	0	0	0	ENSRNOG00000053500	120103270	5	13214646	13214785	-	snoRNA	NA	NA	NA	NA	NA	NA
AABR07047134.1	0	0	0	0	0	0	0	0	0	ENSRNOG00000060316	120103345	5	20954040	20954161	+	snoRNA	NA	NA	NA	NA	NA	NA
AABR07047191.1	19	18	31	13	16	16	5	1	4	ENSRNOG00000062079	NA	5	23013252	23022095	-	lncRNA	NA	NA	NA	NA	NA	NA
AABR07047219.1	5	1	0	1	0	4	1	2	2	ENSRNOG00000048760	NA	5	24542704	24543259	+	pseudogene	NA	NA	NA	NA	NA	NA
AABR07047237.1	0	0	0	0	0	0	0	0	0	ENSRNOG00000060450	NA	5	24839825	24855763	-	lncRNA	NA	NA	NA	NA	NA	NA
AABR07047293.1	0	0	0	0	0	0	0	0	0	ENSRNOG00000032078	NA	5	39030901	39032104	-	protein_coding	NA	NA	NA	NA	NA	NA
AABR07047309.1	0	0	0	0	0	0	0	0	0	ENSRNOG00000054161	120103328	5	27510119	27510246	-	snoRNA	NA	NA	NA	NA	NA	NA
AABR07047309.2	0	0	0	0	0	0	0	0	0	ENSRNOG00000060957	120103334	5	27653107	27653215	+	snoRNA	NA	NA	NA	NA	NA	NA
AABR07047316.1	0	0	0	0	0	0	0	0	0	ENSRNOG00000062174	NA	5	3588103	3588432	+	protein_coding	NA	NA	NA	NA	NA	NA
AABR07047360.1	0	0	0	0	0	0	0	0	0	ENSRNOG00000057229	120103271	5	29334475	29334604	+	snoRNA	NA	NA	NA	NA	NA	NA
AABR07047462.1	2	5	7	8	7	4	4	4	8	ENSRNOG00000056084	120099525	X	19735030	19735144	-	snoRNA	NA	NA	NA	NA	NA	NA
AABR07047498.1	0	0	0	0	0	0	0	0	0	ENSRNOG00000053189	120103316	5	34606496	34606629	-	snoRNA	NA	NA	NA	NA	NA	NA
AABR07047531.1	2	0	0	0	1	1	0	0	0	ENSRNOG00000054117	120103329	5	35992376	35992505	+	snoRNA	NA	NA	NA	NA	NA	NA
AABR07047593.1	1	0	2	0	1	1	3	3	6	ENSRNOG00000006971	NA	6	90647276	90648788	+	protein_coding	NA	NA	NA	NA	NA	NA
AABR07047593.2	0	0	0	0	0	0	0	0	0	ENSRNOG00000055018	120103351	5	38285525	38285644	-	snoRNA	NA	NA	NA	NA	NA	NA
AABR07047604.1	0	0	0	0	0	0	0	0	0	ENSRNOG00000052786	120103335	5	38877850	38877982	+	snoRNA	NA	NA	NA	NA	NA	NA
AABR07047688.1	0	0	0	0	0	0	0	0	0	ENSRNOG00000057956	120103330	5	42536030	42536158	+	snoRNA	NA	NA	NA	NA	NA	NA
AABR07047835.1	29	9	22	15	25	27	39	24	32	ENSRNOG00000023101	NA	5	48925362	48927475	+	protein_coding	NA	NA	NA	NA	NA	NA
AABR07047843.1	0	0	0	0	0	0	0	0	0	ENSRNOG00000061044	120103296	5	49358560	49358689	+	snoRNA	NA	NA	NA	NA	NA	NA
AABR07048031.1	1	4	7	6	4	4	5	13	6	ENSRNOG00000048698	683961	5	56457124	56457669	+	protein_coding	GO:0006412|translation;	NA	GO:0005515|protein binding;	K02953|small subunit ribosomal protein S13e;K02953|small subunit ribosomal protein S13e;	rno03010;rno05171;	Ribosome;Coronavirus disease - COVID-19;
AABR07048045.1	0	0	0	0	0	0	0	0	0	ENSRNOG00000051987	120103346	5	57378192	57378303	-	snoRNA	NA	NA	NA	NA	NA	NA
AABR07048064.1	0	0	0	0	0	0	0	0	0	ENSRNOG00000059526	120103315	5	58644488	58644614	-	snoRNA	NA	NA	NA	NA	NA	NA
AABR07048128.1	0	0	0	0	0	0	0	0	0	ENSRNOG00000056039	120103308	5	62231637	62231768	+	snoRNA	NA	NA	NA	NA	NA	NA
AABR07048174.1	0	0	0	0	0	0	0	0	0	ENSRNOG00000056974	120103341	5	66026236	66026348	+	snoRNA	NA	NA	NA	NA	NA	NA
AABR07048203.1	0	0	0	0	0	0	0	0	0	ENSRNOG00000059716	120103338	5	64697617	64697721	+	snoRNA	NA	NA	NA	NA	NA	NA
AABR07048221.1	0	0	0	0	0	0	0	0	0	ENSRNOG00000058657	120103256	5	63698446	63698522	+	snoRNA	NA	NA	NA	NA	NA	NA
AABR07048231.1	0	0	0	0	0	0	0	0	0	ENSRNOG00000059557	120103339	5	63248644	63248766	+	snoRNA	NA	NA	NA	NA	NA	NA
AABR07048249.1	0	0	0	0	0	0	0	0	0	ENSRNOG00000060748	120103314	5	66883638	66883766	-	snoRNA	NA	NA	NA	NA	NA	NA
AABR07048253.1	0	0	0	0	0	0	0	0	1	ENSRNOG00000005694	NA	4	116096515	116097136	-	pseudogene	NA	NA	NA	NA	NA	NA
AABR07048269.1	0	0	0	0	0	0	0	0	0	ENSRNOG00000056467	120103354	5	67601312	67601439	-	snRNA	NA	NA	NA	NA	NA	NA
AABR07048271.1	40	52	36	52	44	55	84	63	38	ENSRNOG00000033271	NA	5	67671721	67680926	+	protein_coding	NA	NA	NA	NA	NA	NA
AABR07048280.1	1	4	1	4	2	5	2	1	1	ENSRNOG00000017640	500462	5	68571232	68571819	-	protein_coding	NA	NA	GO:0005509|calcium ion binding;	NA	NA	NA
AABR07048281.1	0	0	0	0	0	0	0	0	0	ENSRNOG00000052060	120103343	5	68653912	68654044	+	snoRNA	NA	NA	NA	NA	NA	NA
AABR07048303.3	0	0	0	0	0	0	0	0	0	ENSRNOG00000057202	120103303	5	69432193	69432324	+	snoRNA	NA	NA	NA	NA	NA	NA
AABR07048312.1	0	0	0	0	0	0	0	0	0	ENSRNOG00000029600	NA	5	70315304	70315816	-	protein_coding	NA	NA	NA	NA	NA	NA
AABR07048312.2	0	0	0	0	0	0	0	0	0	ENSRNOG00000052410	120103301	5	70309557	70309688	-	snoRNA	NA	NA	NA	NA	NA	NA
AABR07048387.1	0	0	4	0	0	0	8	2	4	ENSRNOG00000060520	686050	5	73866334	73956444	-	protein_coding	GO:0000712|resolution of meiotic recombination intermediates;GO:0007130|synaptonemal complex assembly;GO:0007131|reciprocal meiotic recombination;	GO:0000794|condensed nuclear chromosome;GO:0005694|chromosome;	GO:0003697|single-stranded DNA binding;GO:0016887|ATP hydrolysis activity;	NA	NA	NA
AABR07048397.1	0	1	0	0	2	0	0	0	0	ENSRNOG00000038905	NA	2	246755907	246757455	-	protein_coding	NA	NA	NA	NA	NA	NA
AABR07048397.3	0	0	0	0	0	0	1	0	0	ENSRNOG00000054422	120103265	5	74379202	74379330	-	snoRNA	NA	NA	NA	NA	NA	NA
AABR07048401.1	0	0	0	0	0	0	0	0	0	ENSRNOG00000061149	120103353	5	74483452	74483511	+	snoRNA	NA	NA	NA	NA	NA	NA
AABR07048419.2	0	0	0	0	0	0	0	0	0	ENSRNOG00000046629	NA	5	74863483	74960101	-	protein_coding	NA	NA	NA	NA	NA	NA
AABR07048463.1	0	0	0	0	0	0	0	0	0	ENSRNOG00000047613	120102892	5	74986802	75016663	-	protein_coding	NA	NA	GO:0005550|pheromone binding;GO:0036094|small molecule binding;	NA	NA	NA
AABR07048473.1	0	0	0	0	0	0	0	0	0	ENSRNOG00000051164	NA	5	75488501	75494427	-	protein_coding	NA	NA	NA	NA	NA	NA
AABR07048521.1	0	0	0	0	0	0	0	0	0	ENSRNOG00000051981	120103331	5	77820811	77820944	+	snoRNA	NA	NA	NA	NA	NA	NA
AABR07048553.1	0	0	0	0	1	0	0	1	0	ENSRNOG00000059204	120103275	5	80248665	80248782	-	snoRNA	NA	NA	NA	NA	NA	NA
AABR07048600.1	0	0	0	0	0	0	0	0	0	ENSRNOG00000030383	298126	5	81083259	81083633	-	protein_coding	NA	NA	NA	NA	NA	NA
AABR07048648.1	0	0	0	0	0	0	0	0	0	ENSRNOG00000053139	NA	5	84177346	84177442	+	snoRNA	NA	NA	NA	NA	NA	NA
AABR07048653.1	150	127	118	140	142	108	65	53	41	ENSRNOG00000047928	683573	5	84280919	84281822	-	protein_coding	GO:0051726|regulation of cell cycle;	NA	NA	NA	NA	NA
AABR07048689.1	0	0	0	0	0	0	0	0	0	ENSRNOG00000060400	120103336	5	85665862	85665987	-	snoRNA	NA	NA	NA	NA	NA	NA
AABR07048726.1	0	0	0	0	0	0	0	0	0	ENSRNOG00000058797	120103332	5	86754583	86754709	-	snoRNA	NA	NA	NA	NA	NA	NA
AABR07048735.1	0	0	0	0	0	0	0	0	0	ENSRNOG00000055618	120103337	5	86992250	86992375	+	snoRNA	NA	NA	NA	NA	NA	NA
AABR07048762.1	0	0	0	0	0	0	0	0	0	ENSRNOG00000056677	120103327	5	87503909	87504029	-	snoRNA	NA	NA	NA	NA	NA	NA
AABR07048770.1	0	0	0	0	0	0	0	0	0	ENSRNOG00000031344	NA	5	88097665	88098141	-	protein_coding	NA	NA	NA	NA	NA	NA
AABR07048800.1	0	0	0	0	0	0	0	0	0	ENSRNOG00000054684	120103302	5	88572552	88572680	+	snoRNA	NA	NA	NA	NA	NA	NA
AABR07048992.1	166	145	145	127	166	138	131	151	229	ENSRNOG00000032585	NA	5	155934794	155936910	+	lncRNA	NA	NA	NA	NA	NA	NA
AABR07048992.2	0	0	0	0	0	0	0	0	0	ENSRNOG00000047341	120103107	5	156009836	156012357	+	protein_coding	GO:0008284|positive regulation of cell population proliferation;GO:0043066|negative regulation of apoptotic process;GO:0045596|negative regulation of cell differentiation;GO:0045892|negative regulation of DNA-templated transcription;	NA	NA	NA	NA	NA
AABR07049038.1	0	0	0	0	0	0	0	0	0	ENSRNOG00000058768	120103348	5	97481664	97481780	+	snoRNA	NA	NA	NA	NA	NA	NA
AABR07049043.1	4	0	1	1	1	2	0	4	0	ENSRNOG00000047278	NA	5	97801560	97802512	+	protein_coding	NA	NA	NA	NA	NA	NA
AABR07049060.1	64	62	83	58	60	61	64	40	78	ENSRNOG00000033445	502957	5	97920002	98282833	+	protein_coding	NA	NA	NA	NA	NA	NA
AABR07049117.1	0	0	0	0	0	0	0	0	0	ENSRNOG00000058607	120103312	5	102483194	102483318	+	snoRNA	NA	NA	NA	NA	NA	NA
AABR07049134.1	309	266	345	276	264	235	213	226	213	ENSRNOG00000051484	NA	5	103337456	103337904	+	pseudogene	NA	NA	NA	NA	NA	NA
AABR07049134.4	17	5	16	12	15	18	14	18	10	ENSRNOG00000052948	NA	5	103365187	103372237	-	lncRNA	NA	NA	NA	NA	NA	NA
AABR07049149.1	72	66	31	43	51	41	91	45	88	ENSRNOG00000024197	100362345	5	103767458	103767925	-	protein_coding	NA	NA	NA	NA	NA	NA
AABR07049152.1	29	33	28	30	28	20	45	43	38	ENSRNOG00000059446	120103317	5	103919376	103919499	-	snoRNA	NA	NA	NA	NA	NA	NA
AABR07049184.1	0	0	0	0	0	0	0	0	0	ENSRNOG00000046140	NA	5	105264288	105265940	+	pseudogene	NA	NA	NA	NA	NA	NA
AABR07049223.1	54	54	43	32	40	46	40	34	55	ENSRNOG00000032516	681162	5	106982882	106983121	-	protein_coding	GO:0051301|cell division;	NA	NA	NA	NA	NA
AABR07049228.1	0	0	0	0	0	0	0	0	0	ENSRNOG00000056007	298241	5	107131587	107131895	-	protein_coding	NA	NA	GO:0005524|ATP binding;GO:0140662|ATP-dependent protein folding chaperone;	NA	NA	NA
AABR07049299.1	0	0	0	0	0	0	0	0	0	ENSRNOG00000026234	NA	5	110824444	110824812	-	protein_coding	NA	NA	NA	NA	NA	NA
AABR07049320.3	0	0	0	0	0	0	0	0	0	ENSRNOG00000052446	120103278	5	112966475	112966607	+	snoRNA	NA	NA	NA	NA	NA	NA
AABR07049326.1	0	0	0	0	0	0	0	0	0	ENSRNOG00000054188	NA	5	113467423	113467900	-	pseudogene	NA	NA	NA	NA	NA	NA
AABR07049329.1	10	7	15	12	15	12	11	19	31	ENSRNOG00000030107	100362298	5	112997113	112997661	+	protein_coding	GO:0006412|translation;	NA	GO:0003723|RNA binding;GO:0003735|structural constituent of ribosome;	NA	NA	NA
AABR07049348.1	2	0	0	0	0	0	0	0	0	ENSRNOG00000008914	NA	5	113976353	113976705	+	pseudogene	NA	NA	NA	NA	NA	NA
AABR07049353.1	0	0	0	0	0	0	0	0	0	ENSRNOG00000008953	NA	5	114217798	114217966	-	pseudogene	NA	NA	NA	NA	NA	NA
AABR07049401.1	0	0	0	0	0	0	0	0	0	ENSRNOG00000037977	100910132	5	116534401	116537096	-	protein_coding	GO:0008284|positive regulation of cell population proliferation;GO:0043066|negative regulation of apoptotic process;GO:0045596|negative regulation of cell differentiation;GO:0045892|negative regulation of DNA-templated transcription;	NA	NA	NA	NA	NA
AABR07049455.1	0	0	0	0	0	0	0	0	0	ENSRNOG00000045614	120096581	5	116613911	116614654	-	protein_coding	NA	NA	NA	NA	NA	NA
AABR07049466.1	0	0	0	0	0	0	0	0	0	ENSRNOG00000053013	NA	5	117367362	117367614	+	pseudogene	NA	NA	NA	NA	NA	NA
AABR07049491.1	0	0	0	0	0	0	0	0	0	ENSRNOG00000055591	NA	5	118877211	118900661	-	lncRNA	NA	NA	NA	NA	NA	NA
AABR07049499.1	0	0	0	0	0	0	0	0	0	ENSRNOG00000030938	500514	5	119677204	119800910	+	protein_coding	GO:0007229|integrin-mediated signaling pathway;GO:0033627|cell adhesion mediated by integrin;GO:0050852|T cell receptor signaling pathway;	GO:0001772|immunological synapse;GO:0045121|membrane raft;	NA	NA	NA	NA
AABR07049503.1	0	0	0	1	0	0	0	0	0	ENSRNOG00000059476	102549668	5	120006310	120012574	-	lncRNA	NA	NA	NA	NA	NA	NA
AABR07049516.1	1041	818	859	832	850	756	1647	1115	1556	ENSRNOG00000008516	688684	5	120631540	120631923	-	protein_coding	GO:0006412|translation;	NA	GO:0003735|structural constituent of ribosome;	NA	NA	NA
AABR07049550.1	0	0	0	0	1	0	0	0	0	ENSRNOG00000060664	120103349	5	123218554	123218681	+	snoRNA	NA	NA	NA	NA	NA	NA
AABR07049554.2	0	0	1	0	0	1	0	1	1	ENSRNOG00000049469	NA	5	123474149	123529804	+	protein_coding	NA	NA	NA	NA	NA	NA
AABR07049569.1	0	0	0	0	0	0	0	0	0	ENSRNOG00000060425	120103306	5	124306820	124306946	+	snoRNA	NA	NA	NA	NA	NA	NA
AABR07049631.1	0	0	0	0	0	0	0	0	0	ENSRNOG00000059783	102546830	X	18620751	18630488	+	protein_coding	NA	NA	NA	NA	NA	NA
AABR07049648.1	0	0	0	0	0	0	0	0	0	ENSRNOG00000042047	313485	5	126875682	126913167	+	protein_coding	NA	NA	NA	NA	NA	NA
AABR07049728.1	0	0	0	0	0	0	0	0	0	ENSRNOG00000033231	NA	5	131226562	131229441	+	protein_coding	NA	NA	NA	NA	NA	NA
AABR07049821.1	8	5	4	4	4	7	7	3	8	ENSRNOG00000011484	680700	5	134578565	134579341	-	protein_coding	GO:0006412|translation;	NA	GO:0003735|structural constituent of ribosome;	NA	NA	NA
AABR07049821.2	9	9	13	14	15	12	265	275	212	ENSRNOG00000028662	100363455	5	134501998	134514358	-	protein_coding	GO:0019216|regulation of lipid metabolic process;	GO:0005634|nucleus;	NA	K09228|KRAB domain-containing zinc finger protein;	rno05168;	Herpes simplex virus 1 infection;
AABR07049918.1	0	0	1	0	0	0	0	0	1	ENSRNOG00000029310	NA	5	139195914	139196714	+	protein_coding	NA	NA	NA	NA	NA	NA
AABR07049918.2	0	0	0	0	0	0	0	0	0	ENSRNOG00000058210	120103340	5	139145804	139145928	-	snoRNA	NA	NA	NA	NA	NA	NA
AABR07050017.2	0	0	0	0	0	0	0	0	0	ENSRNOG00000055493	120103282	5	142624702	142624889	-	scaRNA	NA	NA	NA	NA	NA	NA
AABR07050044.1	0	0	0	0	0	0	0	0	0	ENSRNOG00000059967	120103325	5	143029027	143029151	-	snoRNA	NA	NA	NA	NA	NA	NA
AABR07050056.1	0	0	0	0	0	0	0	0	0	ENSRNOG00000061098	120103298	5	143411173	143411304	+	snoRNA	NA	NA	NA	NA	NA	NA
AABR07050084.1	983	956	893	924	1002	922	724	668	991	ENSRNOG00000053163	120103261	5	144505211	144505346	+	snoRNA	NA	NA	NA	NA	NA	NA
AABR07050161.1	0	0	1	0	1	2	0	0	0	ENSRNOG00000051842	120103267	5	147790279	147790348	-	snoRNA	NA	NA	NA	NA	NA	NA
AABR07050222.1	29	22	10	27	15	13	25	26	21	ENSRNOG00000037091	NA	5	150611942	150612968	+	protein_coding	NA	NA	NA	NA	NA	NA
AABR07050391.1	0	0	0	0	0	0	0	1	0	ENSRNOG00000055061	100361693	5	157509451	157599926	+	protein_coding	GO:0006355|regulation of DNA-templated transcription;	GO:0005654|nucleoplasm;GO:0005829|cytosol;	GO:0046872|metal ion binding;	NA	NA	NA
AABR07050399.2	107	100	109	91	114	112	110	140	119	ENSRNOG00000059160	102551014	5	157422422	157447336	-	protein_coding	NA	NA	GO:0046872|metal ion binding;	NA	NA	NA
AABR07050484.1	5	5	7	3	3	5	2	7	4	ENSRNOG00000059428	100125366	5	160314964	160317098	+	protein_coding	NA	NA	GO:0003723|RNA binding;	NA	NA	NA
AABR07050545.1	487	425	531	479	476	469	651	605	844	ENSRNOG00000027694	100362830	5	162360907	162361603	-	protein_coding	GO:0006412|translation;	GO:0005840|ribosome;GO:1990904|ribonucleoprotein complex;	GO:0003735|structural constituent of ribosome;	K02993|small subunit ribosomal protein S7e;K02993|small subunit ribosomal protein S7e;	rno03010;rno05171;	Ribosome;Coronavirus disease - COVID-19;
AABR07051240.1	0	3	1	1	0	0	0	1	1	ENSRNOG00000024412	108350588	3	8001626	8002130	+	protein_coding	GO:0006412|translation;	GO:0005840|ribosome;GO:1990904|ribonucleoprotein complex;	GO:0003735|structural constituent of ribosome;	K02894|large subunit ribosomal protein L23e;K02894|large subunit ribosomal protein L23e;	rno03010;rno05171;	Ribosome;Coronavirus disease - COVID-19;
AABR07051244.1	0	0	0	0	0	0	0	0	0	ENSRNOG00000047422	NA	3	8564954	8567097	+	protein_coding	NA	NA	NA	NA	NA	NA
AABR07051251.1	0	0	0	0	0	0	0	0	0	ENSRNOG00000056471	102552073	3	9479235	9483553	+	protein_coding	NA	NA	GO:0036094|small molecule binding;	NA	NA	NA
AABR07051348.1	0	0	0	0	0	0	0	0	0	ENSRNOG00000059455	NA	3	10086328	10092383	+	protein_coding	NA	NA	NA	NA	NA	NA
AABR07051348.2	0	0	0	0	0	0	0	0	0	ENSRNOG00000060791	NA	3	10108061	10113724	-	protein_coding	NA	NA	NA	NA	NA	NA
AABR07051376.1	547	490	462	448	426	383	278	208	201	ENSRNOG00000027193	685398	3	11781295	11790073	+	protein_coding	GO:0010923|negative regulation of phosphatase activity;	NA	GO:0004864|protein phosphatase inhibitor activity;	NA	NA	NA
AABR07051395.1	0	0	0	0	0	0	0	0	0	ENSRNOG00000046655	102546892	3	13021696	13028559	-	protein_coding	NA	GO:0016020|membrane;	NA	NA	NA	NA
AABR07051399.1	8	2	0	2	5	5	0	3	0	ENSRNOG00000055886	NA	3	13869953	13885361	+	pseudogene	NA	NA	NA	NA	NA	NA
AABR07051404.1	0	0	1	0	0	0	0	0	0	ENSRNOG00000062268	NA	3	14530993	14532285	-	protein_coding	NA	NA	NA	NA	NA	NA
AABR07051450.1	642	575	635	540	604	456	1925	1854	2328	ENSRNOG00000049056	24183	3	15912485	15923041	+	protein_coding	GO:0006165|nucleoside diphosphate phosphorylation;GO:0006172|ADP biosynthetic process;GO:0007517|muscle organ development;GO:0009142|nucleoside triphosphate biosynthetic process;GO:0009410|response to xenobiotic stimulus;GO:0010828|positive regulation of glucose transmembrane transport;GO:0014042|positive regulation of neuron maturation;GO:0014823|response to activity;GO:0021549|cerebellum develo…	GO:0001520|outer dense fiber;GO:0005737|cytoplasm;GO:0005829|cytosol;GO:0005886|plasma membrane;GO:0030017|sarcomere;GO:0036126|sperm flagellum;GO:0043005|neuron projection;GO:0048471|perinuclear region of cytoplasm;	GO:0004017|adenylate kinase activity;GO:0004550|nucleoside diphosphate kinase activity;GO:0005524|ATP binding;GO:0016776|phosphotransferase activity, phosphate group as acceptor;GO:0046899|nucleoside triphosphate adenylate kinase activity;	K00939|adenylate kinase [EC:2.7.4.3];K00939|adenylate kinase [EC:2.7.4.3];K00939|adenylate kinase [EC:2.7.4.3];K00939|adenylate kinase [EC:2.7.4.3];K00939|adenylate kinase [EC:2.7.4.3];	rno00230;rno00730;rno01100;rno01232;rno01240;	Purine metabolism;Thiamine metabolism;Metabolic pathways;Nucleotide metabolism;Biosynthesis of cofactors;
AABR07051462.1	0	0	0	0	0	0	0	0	0	ENSRNOG00000054789	120102022	3	16853666	16853809	-	snoRNA	NA	NA	NA	NA	NA	NA
AABR07051507.1	0	0	0	0	0	0	1	0	0	ENSRNOG00000022033	362120	3	18404899	18420054	-	protein_coding	GO:0006954|inflammatory response;GO:0006957|complement activation, alternative pathway;GO:0006958|complement activation, classical pathway;	GO:0005615|extracellular space;	GO:0004866|endopeptidase inhibitor activity;	NA	NA	NA
AABR07051565.1	0	0	0	0	0	0	0	0	0	ENSRNOG00000053188	502834	4	101762864	101763728	-	protein_coding	NA	NA	NA	NA	NA	NA
AABR07051678.1	0	0	0	0	0	0	0	0	0	ENSRNOG00000048541	NA	4	100041408	100086157	-	protein_coding	NA	NA	NA	NA	NA	NA
AABR07051787.1	314	306	275	280	260	284	361	386	478	ENSRNOG00000059243	NA	3	20872698	20881301	-	protein_coding	NA	NA	NA	NA	NA	NA
AABR07051791.1	0	0	0	0	0	0	0	0	0	ENSRNOG00000046568	120101894	3	21021861	21022169	+	protein_coding	GO:0006368|transcription elongation by RNA polymerase II;	NA	NA	NA	NA	NA
AABR07051796.1	0	0	0	0	0	0	0	0	0	ENSRNOG00000030143	366030	3	21494203	21494676	+	protein_coding	GO:0006412|translation;	NA	NA	NA	NA	NA
AABR07051827.1	0	0	0	0	0	0	0	0	0	ENSRNOG00000055168	120102092	3	22738072	22738216	-	snoRNA	NA	NA	NA	NA	NA	NA
AABR07051831.1	0	7	1	8	7	2	4	2	1	ENSRNOG00000015854	NA	3	23215541	23222588	-	protein_coding	NA	NA	NA	NA	NA	NA
AABR07051984.1	0	0	0	0	0	0	0	0	0	ENSRNOG00000056181	120102009	3	31366548	31366647	-	snoRNA	NA	NA	NA	NA	NA	NA
AABR07051986.1	0	0	0	0	0	0	0	0	0	ENSRNOG00000058161	120102080	3	31527928	31528053	+	snoRNA	NA	NA	NA	NA	NA	NA
AABR07052064.1	0	0	0	0	0	0	0	0	0	ENSRNOG00000055571	120102076	3	30520382	30520498	+	snoRNA	NA	NA	NA	NA	NA	NA
AABR07052065.1	0	0	0	0	0	0	0	0	0	ENSRNOG00000057475	120102072	3	30815503	30815603	-	snoRNA	NA	NA	NA	NA	NA	NA
AABR07052084.1	0	0	0	0	0	0	0	0	0	ENSRNOG00000048601	120101547	3	34585986	34586294	-	protein_coding	NA	NA	GO:0008289|lipid binding;	NA	NA	NA
AABR07052085.1	11	8	13	9	9	10	9	15	15	ENSRNOG00000005951	679581	3	34673373	34674332	+	protein_coding	NA	GO:0005634|nucleus;	GO:0003723|RNA binding;	NA	NA	NA
AABR07052085.2	6	3	4	4	5	8	2	4	0	ENSRNOG00000052827	NA	3	34727615	34736247	+	lncRNA	NA	NA	NA	NA	NA	NA
AABR07052125.1	0	0	0	0	0	0	0	0	0	ENSRNOG00000006829	NA	3	36831388	36831908	-	protein_coding	NA	NA	NA	NA	NA	NA
AABR07052125.2	0	0	0	0	0	0	0	0	0	ENSRNOG00000047241	NA	3	2842643	2843715	-	pseudogene	NA	NA	NA	NA	NA	NA
AABR07052126.1	0	0	0	0	0	0	0	0	0	ENSRNOG00000052295	120102058	3	36994302	36994428	+	snoRNA	NA	NA	NA	NA	NA	NA
AABR07052130.1	0	0	0	0	0	2	0	0	0	ENSRNOG00000008501	NA	6	27672630	27673237	-	protein_coding	NA	NA	NA	NA	NA	NA
AABR07052148.1	0	0	0	0	0	0	0	0	0	ENSRNOG00000058310	120102079	3	38153936	38154056	-	snoRNA	NA	NA	NA	NA	NA	NA
AABR07052159.1	0	0	0	0	0	0	0	0	2	ENSRNOG00000058919	120102077	3	39021170	39021277	-	snoRNA	NA	NA	NA	NA	NA	NA
AABR07052161.1	0	0	0	0	0	0	0	0	0	ENSRNOG00000053212	120102015	3	39351674	39351809	+	snoRNA	NA	NA	NA	NA	NA	NA
AABR07052327.1	0	0	0	0	1	0	0	0	0	ENSRNOG00000054061	NA	3	46362419	46561711	+	lncRNA	NA	NA	NA	NA	NA	NA
AABR07052350.1	0	0	0	0	0	0	0	0	0	ENSRNOG00000052454	120102053	3	47443257	47443380	-	snoRNA	NA	NA	NA	NA	NA	NA
AABR07052402.1	0	0	0	0	0	0	0	0	0	ENSRNOG00000059732	120102041	3	50053871	50054023	-	snoRNA	NA	NA	NA	NA	NA	NA
AABR07052406.1	0	0	0	0	0	0	0	0	0	ENSRNOG00000051665	120102075	3	50490168	50490295	-	snoRNA	NA	NA	NA	NA	NA	NA
AABR07052430.1	47	57	61	40	49	51	67	63	67	ENSRNOG00000007605	499803	3	51559683	51560524	-	protein_coding	GO:0006281|DNA repair;GO:0006412|translation;GO:0006417|regulation of translation;GO:0006915|apoptotic process;GO:0051301|cell division;	GO:0005730|nucleolus;GO:0005743|mitochondrial inner membrane;GO:0005819|spindle;	GO:0003677|DNA binding;GO:0003723|RNA binding;GO:0140078|class I DNA-(apurinic or apyrimidinic site) endonuclease activity;	NA	NA	NA
AABR07052465.1	0	0	0	0	0	0	0	0	0	ENSRNOG00000050620	NA	3	53998486	54003647	+	protein_coding	NA	NA	NA	NA	NA	NA
AABR07052486.1	49	51	46	45	65	43	65	64	51	ENSRNOG00000009382	502633	3	55770167	55863676	-	protein_coding	GO:0007519|skeletal muscle tissue development;GO:0016570|histone modification;GO:0016573|histone acetylation;GO:0045444|fat cell differentiation;GO:0070131|positive regulation of mitochondrial translation;GO:0080009|mRNA methylation;GO:0106217|tRNA C3-cytosine methylation;	GO:0005634|nucleus;GO:0005737|cytoplasm;GO:0005739|mitochondrion;	GO:0004402|histone acetyltransferase activity;GO:0008174|mRNA methyltransferase activity;GO:0052735|tRNA (cytosine-3-)-methyltransferase activity;	NA	NA	NA
AABR07052510.1	0	0	0	0	0	0	0	0	0	ENSRNOG00000053318	120102074	3	56825307	56825429	-	snoRNA	NA	NA	NA	NA	NA	NA
AABR07052511.1	0	0	0	0	0	0	0	0	0	ENSRNOG00000057896	120102014	3	56964327	56964460	-	snoRNA	NA	NA	NA	NA	NA	NA
AABR07052519.1	3	7	4	4	2	5	3	4	5	ENSRNOG00000029423	NA	3	57334747	57335597	-	protein_coding	NA	NA	NA	NA	NA	NA
AABR07052523.1	238	212	274	255	245	221	1352	1124	1274	ENSRNOG00000028543	688509	3	57576709	57578013	+	protein_coding	GO:0006096|glycolytic process;	NA	GO:0000287|magnesium ion binding;	NA	NA	NA
AABR07052523.2	0	0	0	0	1	0	0	0	0	ENSRNOG00000060690	NA	3	57555676	57572254	-	lncRNA	NA	NA	NA	NA	NA	NA
AABR07052559.1	0	0	0	0	0	0	0	0	0	ENSRNOG00000053144	NA	3	59616135	59616821	-	protein_coding	NA	NA	NA	NA	NA	NA
AABR07052692.1	0	0	0	0	0	0	0	0	0	ENSRNOG00000047487	NA	3	67324510	67325566	-	protein_coding	NA	NA	NA	NA	NA	NA
AABR07052726.1	0	0	0	0	0	0	0	0	0	ENSRNOG00000054178	120102065	3	68552105	68552234	+	snoRNA	NA	NA	NA	NA	NA	NA
AABR07052816.1	0	0	0	0	0	0	0	0	0	ENSRNOG00000059616	120102097	3	73879890	73880015	-	snRNA	NA	NA	NA	NA	NA	NA
AABR07052859.1	1	2	0	0	0	1	0	0	0	ENSRNOG00000052197	120102013	3	76728823	76728928	+	snoRNA	NA	NA	NA	NA	NA	NA
AABR07052904.2	0	0	0	0	0	0	0	0	0	ENSRNOG00000060026	120102004	3	80658553	80658689	-	snoRNA	NA	NA	NA	NA	NA	NA
AABR07053065.1	3	4	2	1	1	2	1	1	2	ENSRNOG00000004381	NA	3	86511659	86512126	-	protein_coding	NA	NA	NA	NA	NA	NA
AABR07053166.1	2	2	2	2	1	1	1	4	1	ENSRNOG00000029262	362181	3	91267220	91267774	-	protein_coding	NA	NA	NA	NA	NA	NA
AABR07053185.1	116	106	145	117	113	97	52	70	99	ENSRNOG00000004787	687694	3	92162280	92385243	-	protein_coding	GO:0002098|tRNA wobble uridine modification;GO:0006357|regulation of transcription by RNA polymerase II;	GO:0005654|nucleoplasm;GO:0005737|cytoplasm;GO:0008023|transcription elongation factor complex;GO:0033588|elongator holoenzyme complex;	GO:0000993|RNA polymerase II complex binding;GO:0008607|phosphorylase kinase regulator activity;	NA	NA	NA
AABR07053188.1	1	0	0	0	0	0	0	0	0	ENSRNOG00000031694	108350427	3	92369742	92370074	+	protein_coding	NA	NA	NA	NA	NA	NA
AABR07053236.1	0	0	0	0	0	0	0	0	0	ENSRNOG00000049619	100910078	3	1529712	1534661	-	protein_coding	GO:0007276|gamete generation;	NA	NA	NA	NA	NA
AABR07053303.1	0	0	0	0	0	0	0	0	0	ENSRNOG00000061689	120102061	3	94020971	94021100	+	snoRNA	NA	NA	NA	NA	NA	NA
AABR07053304.1	0	0	0	0	0	0	0	1	0	ENSRNOG00000050529	NA	3	154093986	154094378	-	protein_coding	NA	NA	NA	NA	NA	NA
AABR07053402.1	0	0	0	0	0	0	0	0	0	ENSRNOG00000029847	100359546	3	99990743	99991003	-	protein_coding	NA	GO:0000785|chromatin;	GO:0031492|nucleosomal DNA binding;	NA	NA	NA
AABR07053431.1	0	0	0	0	0	0	0	0	0	ENSRNOG00000058974	120102042	3	102077660	102077791	+	snoRNA	NA	NA	NA	NA	NA	NA
AABR07053472.1	463	385	410	389	386	386	197	155	139	ENSRNOG00000005366	499866	3	104134824	104163704	+	protein_coding	GO:0006479|protein methylation;GO:0008284|positive regulation of cell population proliferation;GO:0010628|positive regulation of gene expression;	GO:0005634|nucleus;GO:0005654|nucleoplasm;GO:0005737|cytoplasm;GO:0043231|intracellular membrane-bounded organelle;GO:0072669|tRNA-splicing ligase complex;	GO:0008276|protein methyltransferase activity;GO:0042802|identical protein binding;	NA	NA	NA
AABR07053500.2	0	0	1	0	1	0	0	0	0	ENSRNOG00000060434	499867	3	105757581	105760832	+	protein_coding	NA	NA	NA	NA	NA	NA
AABR07053509.1	1	2	2	2	7	7	7	5	6	ENSRNOG00000057149	NA	3	106995999	106996337	-	protein_coding	NA	NA	NA	NA	NA	NA
AABR07053513.1	0	0	0	0	0	0	0	0	0	ENSRNOG00000057181	120102010	3	107415211	107415319	-	snoRNA	NA	NA	NA	NA	NA	NA
AABR07053516.1	993	942	1063	978	1012	1011	888	749	865	ENSRNOG00000050552	64630	3	107514131	107544320	+	protein_coding	GO:0002553|histamine secretion by mast cell;GO:0006887|exocytosis;GO:0015031|protein transport;GO:0016082|synaptic vesicle priming;GO:0016192|vesicle-mediated transport;GO:0017157|regulation of exocytosis;GO:0031629|synaptic vesicle fusion to presynaptic active zone membrane;GO:0061025|membrane fusion;GO:0065003|protein-containing complex assembly;GO:0098967|exocytic insertion of neurotransmitter…	GO:0005654|nucleoplasm;GO:0005737|cytoplasm;GO:0005739|mitochondrion;GO:0005886|plasma membrane;GO:0005912|adherens junction;GO:0030659|cytoplasmic vesicle membrane;GO:0031201|SNARE complex;GO:0031410|cytoplasmic vesicle;GO:0042581|specific granule;GO:0042582|azurophil granule;GO:0043005|neuron projection;GO:0043195|terminal bouton;GO:0070032|synaptobrevin 2-SNAP-25-syntaxin-1a-complexin I comple…	GO:0005484|SNAP receptor activity;GO:0005515|protein binding;GO:0017075|syntaxin-1 binding;GO:0019905|syntaxin binding;	K08508|synaptosomal-associated protein 23;K08508|synaptosomal-associated protein 23;	rno04130;rno04611;	SNARE interactions in vesicular transport;Platelet activation;
AABR07053580.1	2	4	1	1	1	2	0	0	0	ENSRNOG00000051627	NA	3	109634101	109635593	-	protein_coding	NA	NA	NA	NA	NA	NA
AABR07053635.2	2	0	2	0	0	0	4	1	1	ENSRNOG00000031585	120101650	3	112838854	112839309	+	protein_coding	NA	NA	NA	NA	NA	NA
AABR07053707.1	0	0	0	0	0	0	0	0	0	ENSRNOG00000055576	120102056	3	116105515	116105641	+	snoRNA	NA	NA	NA	NA	NA	NA
AABR07053716.1	2	0	2	0	0	0	0	0	1	ENSRNOG00000029173	680575	3	116994164	116994532	+	protein_coding	NA	GO:0005840|ribosome;GO:1990904|ribonucleoprotein complex;	NA	NA	NA	NA
AABR07053723.1	0	0	0	0	0	0	0	0	0	ENSRNOG00000059024	120102055	3	117295470	117295602	+	snoRNA	NA	NA	NA	NA	NA	NA
AABR07053734.1	0	0	0	0	0	0	0	0	0	ENSRNOG00000031034	NA	3	117490206	117490583	+	protein_coding	NA	NA	NA	NA	NA	NA
AABR07053734.2	1	2	8	5	5	2	5	4	6	ENSRNOG00000033913	100360642	3	117491079	117491477	+	protein_coding	GO:0006412|translation;	GO:0005840|ribosome;GO:1990904|ribonucleoprotein complex;	GO:0003735|structural constituent of ribosome;	NA	NA	NA
AABR07053741.1	173	147	167	125	162	156	150	107	56	ENSRNOG00000053270	366192	3	117830083	117847820	-	protein_coding	GO:0000963|mitochondrial RNA processing;GO:0044528|regulation of mitochondrial mRNA stability;	GO:0005739|mitochondrion;GO:0035770|ribonucleoprotein granule;GO:0042645|mitochondrial nucleoid;	GO:0019843|rRNA binding;	NA	NA	NA
AABR07053749.1	0	0	0	0	0	0	0	0	0	ENSRNOG00000038259	296169	3	118672233	118672933	-	protein_coding	GO:0043161|proteasome-mediated ubiquitin-dependent protein catabolic process;	NA	NA	NA	NA	NA
AABR07053749.2	304	269	273	257	259	254	180	153	148	ENSRNOG00000053070	108350566	3	118679472	118680908	+	protein_coding	NA	GO:0005576|extracellular region;	GO:0003723|RNA binding;	NA	NA	NA
AABR07053828.1	0	0	0	0	0	0	0	0	0	ENSRNOG00000052086	120102018	3	123674265	123674392	-	scaRNA	NA	NA	NA	NA	NA	NA
AABR07053830.1	0	0	0	0	0	0	0	0	0	ENSRNOG00000055829	NA	3	123809335	123847751	+	protein_coding	NA	NA	NA	NA	NA	NA
AABR07053837.1	0	0	0	1	1	0	0	0	0	ENSRNOG00000054840	NA	3	124192580	124192924	+	pseudogene	NA	NA	NA	NA	NA	NA
AABR07053866.1	0	0	0	0	0	0	0	0	0	ENSRNOG00000051005	NA	3	125791610	125792892	-	pseudogene	NA	NA	NA	NA	NA	NA
AABR07053884.1	0	0	0	0	0	2	0	0	0	ENSRNOG00000030601	NA	3	126570653	126570904	-	protein_coding	NA	NA	NA	NA	NA	NA
AABR07054000.1	33	35	28	35	34	27	19	9	16	ENSRNOG00000050784	685695	3	127720181	129734492	+	protein_coding	GO:0006974|cellular response to DNA damage stimulus;GO:0007420|brain development;GO:0008150|biological_process;GO:0009617|response to bacterium;GO:0042278|purine nucleoside metabolic process;GO:0051725|protein de-ADP-ribosylation;GO:0140291|peptidyl-glutamate ADP-deribosylation;	GO:0005575|cellular_component;GO:0005634|nucleus;GO:0005654|nucleoplasm;GO:0005730|nucleolus;	GO:0003674|molecular_function;GO:0016798|hydrolase activity, acting on glycosyl bonds;GO:0019213|deacetylase activity;GO:0140293|ADP-ribosylglutamate hydrolase activity;	NA	NA	NA
AABR07054026.1	0	0	0	0	0	0	0	0	0	ENSRNOG00000056813	120102071	3	130137075	130137194	+	snoRNA	NA	NA	NA	NA	NA	NA
AABR07054045.1	51	53	56	58	59	62	54	32	43	ENSRNOG00000057476	NA	3	130893307	130894432	-	pseudogene	NA	NA	NA	NA	NA	NA
AABR07054088.1	0	0	0	0	1	0	0	0	0	ENSRNOG00000059132	120102073	3	132960051	132960169	-	snoRNA	NA	NA	NA	NA	NA	NA
AABR07054129.1	0	0	0	1	0	1	0	0	0	ENSRNOG00000058773	120102104	3	135571162	135571451	+	snoRNA	NA	NA	NA	NA	NA	NA
AABR07054186.1	0	0	0	0	0	0	0	0	0	ENSRNOG00000032769	NA	3	136658511	136661275	-	protein_coding	NA	NA	NA	NA	NA	NA
AABR07054189.1	105	110	132	120	126	100	1042	805	1312	ENSRNOG00000033100	689130	3	136914906	136915776	+	protein_coding	GO:0006826|iron ion transport;GO:0006879|intracellular iron ion homeostasis;	NA	GO:0008199|ferric iron binding;	K00522|ferritin heavy chain [EC:1.16.3.2];K00522|ferritin heavy chain [EC:1.16.3.2];K00522|ferritin heavy chain [EC:1.16.3.2];	rno04216;rno04217;rno04978;	Ferroptosis;Necroptosis;Mineral absorption;
AABR07054232.1	0	0	0	0	0	0	0	0	0	ENSRNOG00000043043	NA	3	137470399	137473857	+	protein_coding	NA	NA	NA	NA	NA	NA
AABR07054262.1	21	15	20	20	17	19	11	6	12	ENSRNOG00000056526	NA	3	138778150	138779864	-	protein_coding	NA	NA	NA	NA	NA	NA
AABR07054266.1	2	5	5	3	1	2	10	6	3	ENSRNOG00000005920	108350493	3	138600187	138600965	-	protein_coding	GO:0090502|RNA phosphodiester bond hydrolysis, endonucleolytic;	GO:0043202|lysosomal lumen;	GO:0003723|RNA binding;GO:0033897|ribonuclease T2 activity;	NA	NA	NA
AABR07054286.1	13	18	19	24	14	20	10	5	12	ENSRNOG00000055769	296256	3	139344037	139365237	-	protein_coding	NA	NA	GO:0005524|ATP binding;	NA	NA	NA
AABR07054295.1	0	0	0	0	0	0	0	0	0	ENSRNOG00000051908	120102054	3	139854323	139854450	-	snoRNA	NA	NA	NA	NA	NA	NA
AABR07054319.1	111	66	110	85	72	72	509	479	383	ENSRNOG00000031167	NA	3	140599608	140628448	+	protein_coding	NA	NA	NA	NA	NA	NA
AABR07054333.1	0	0	0	0	0	0	0	0	3	ENSRNOG00000051455	120102102	3	141335435	141335551	-	snoRNA	NA	NA	NA	NA	NA	NA
AABR07054341.1	0	0	0	0	0	0	0	0	4	ENSRNOG00000052433	103691935	3	142062053	142076325	-	lncRNA	NA	NA	NA	NA	NA	NA
AABR07054341.2	0	0	0	0	0	0	0	0	0	ENSRNOG00000056754	NA	3	142036620	142039584	-	lncRNA	NA	NA	NA	NA	NA	NA
AABR07054361.1	165	117	185	112	129	120	147	132	148	ENSRNOG00000031275	690027	3	142943684	142945346	-	protein_coding	GO:0006597|spermine biosynthetic process;	NA	GO:0016768|spermine synthase activity;	NA	NA	NA
AABR07054362.1	7	12	9	11	13	8	13	14	14	ENSRNOG00000050899	NA	3	142961653	142962603	-	protein_coding	NA	NA	NA	NA	NA	NA
AABR07054367.1	123	145	134	123	128	164	171	149	222	ENSRNOG00000017086	296300	3	143119093	143156249	+	protein_coding	GO:0006357|regulation of transcription by RNA polymerase II;GO:0045893|positive regulation of DNA-templated transcription;	GO:0005634|nucleus;	GO:0001216|DNA-binding transcription activator activity;GO:0003677|DNA binding;	NA	NA	NA
AABR07054368.1	2033	1824	2102	1982	1732	1648	2675	2787	3789	ENSRNOG00000029996	NA	3	143138640	143140802	-	protein_coding	NA	NA	NA	NA	NA	NA
AABR07054395.1	0	0	0	0	0	0	0	0	0	ENSRNOG00000059287	120102066	3	147810531	147810653	+	snoRNA	NA	NA	NA	NA	NA	NA
AABR07054399.1	0	0	0	0	0	0	0	0	0	ENSRNOG00000055243	120102024	3	144829292	144829430	-	snoRNA	NA	NA	NA	NA	NA	NA
AABR07054456.2	0	0	0	0	0	0	0	0	0	ENSRNOG00000049208	120101773	3	146410305	146410634	-	protein_coding	GO:0006850|mitochondrial pyruvate transmembrane transport;	GO:0005743|mitochondrial inner membrane;	NA	NA	NA	NA
AABR07054469.1	0	0	0	0	0	0	0	0	0	ENSRNOG00000029227	NA	3	147354348	147355972	-	protein_coding	NA	NA	NA	NA	NA	NA
AABR07054578.1	370	286	334	315	330	310	423	372	229	ENSRNOG00000019099	685574	3	154113561	154125057	-	protein_coding	NA	NA	GO:0046872|metal ion binding;	K09228|KRAB domain-containing zinc finger protein;	rno05168;	Herpes simplex virus 1 infection;
AABR07054608.1	0	0	0	0	0	0	0	0	0	ENSRNOG00000052603	NA	3	155116174	155116769	+	protein_coding	NA	NA	NA	NA	NA	NA
AABR07054614.1	814	693	743	738	650	635	1533	1440	1844	ENSRNOG00000008245	25527	3	155916412	155965451	-	protein_coding	GO:0001516|prostaglandin biosynthetic process;GO:0001666|response to hypoxia;GO:0006690|icosanoid metabolic process;GO:0007566|embryo implantation;GO:0032088|negative regulation of NF-kappaB transcription factor activity;GO:0035360|positive regulation of peroxisome proliferator activated receptor signaling pathway;GO:0042311|vasodilation;GO:0045019|negative regulation of nitric oxide biosynthetic…	GO:0005615|extracellular space;GO:0005634|nucleus;GO:0005737|cytoplasm;GO:0005783|endoplasmic reticulum;GO:0005789|endoplasmic reticulum membrane;GO:0005901|caveola;	GO:0004497|monooxygenase activity;GO:0005506|iron ion binding;GO:0008116|prostaglandin-I synthase activity;GO:0016705|oxidoreductase activity, acting on paired donors, with incorporation or reduction of molecular oxygen;GO:0016829|lyase activity;GO:0016853|isomerase activity;GO:0020037|heme binding;GO:0106256|hydroperoxy icosatetraenoate dehydratase activity;	K01831|prostacyclin synthase [EC:5.3.99.4];K01831|prostacyclin synthase [EC:5.3.99.4];	rno00590;rno01100;	Arachidonic acid metabolism;Metabolic pathways;
AABR07054655.1	0	0	0	0	0	0	0	0	0	ENSRNOG00000058635	120102059	3	157621381	157621508	-	snoRNA	NA	NA	NA	NA	NA	NA
AABR07055492.1	18	20	13	4	3	7	11	19	26	ENSRNOG00000056878	NA	7	2315252	2316488	+	protein_coding	NA	NA	NA	NA	NA	NA
AABR07055527.1	4	0	9	5	2	2	7	6	6	ENSRNOG00000039997	NA	7	4352572	4353409	+	protein_coding	NA	NA	NA	NA	NA	NA
AABR07055562.1	0	0	0	0	0	0	0	0	0	ENSRNOG00000060993	120093980	7	5236284	5236420	-	snoRNA	NA	NA	NA	NA	NA	NA
AABR07055788.1	0	0	0	0	0	0	0	0	0	ENSRNOG00000056930	NA	7	7595009	7595386	-	processed_pseudogene	NA	NA	NA	NA	NA	NA
AABR07055789.1	0	0	0	0	0	0	0	0	0	ENSRNOG00000008398	NA	7	7402914	7407032	-	pseudogene	NA	NA	NA	NA	NA	NA
AABR07055861.1	0	0	0	0	0	0	0	0	0	ENSRNOG00000028146	NA	7	11111581	11114960	-	protein_coding	NA	NA	NA	NA	NA	NA
AABR07055864.2	0	0	0	0	0	0	0	0	0	ENSRNOG00000060598	NA	7	11164883	11165179	+	protein_coding	NA	NA	NA	NA	NA	NA
AABR07055919.1	92	93	116	85	139	109	89	84	59	ENSRNOG00000007076	108348125	7	12678551	12693574	-	protein_coding	GO:0006355|regulation of DNA-templated transcription;	NA	GO:0046872|metal ion binding;	K09228|KRAB domain-containing zinc finger protein;	rno05168;	Herpes simplex virus 1 infection;
AABR07055938.1	0	0	0	0	0	0	0	0	0	ENSRNOG00000055214	120093978	7	2870843	2870974	-	snoRNA	NA	NA	NA	NA	NA	NA
AABR07055943.1	1	0	1	0	3	0	3	1	0	ENSRNOG00000000958	NA	7	2942302	2943416	-	pseudogene	NA	NA	NA	NA	NA	NA
AABR07056013.1	0	0	2	2	0	1	0	0	0	ENSRNOG00000009072	314660	7	14195918	14196727	+	protein_coding	GO:0071108|protein K48-linked deubiquitination;	GO:0005634|nucleus;	GO:0004843|cysteine-type deubiquitinase activity;GO:0043130|ubiquitin binding;	NA	NA	NA
AABR07056118.1	0	0	0	0	0	0	0	0	0	ENSRNOG00000048230	300308	7	15821379	15838813	+	protein_coding	GO:0006468|protein phosphorylation;GO:0035556|intracellular signal transduction;	NA	GO:0004674|protein serine/threonine kinase activity;GO:0005524|ATP binding;	NA	NA	NA
AABR07056369.1	0	0	0	0	0	0	0	0	0	ENSRNOG00000026976	108348097	7	14714261	14751986	+	protein_coding	GO:0007186|G protein-coupled receptor signaling pathway;	NA	NA	NA	NA	NA
AABR07056390.1	0	0	0	0	0	0	0	0	0	ENSRNOG00000056018	NA	7	15976445	16010367	+	lncRNA	NA	NA	NA	NA	NA	NA
AABR07056470.1	0	0	0	1	0	0	1	2	3	ENSRNOG00000058647	NA	7	20338316	20338954	+	protein_coding	NA	NA	NA	NA	NA	NA
AABR07056503.1	0	0	0	0	0	0	0	0	0	ENSRNOG00000053843	102550284	7	21317455	21324011	+	protein_coding	NA	NA	GO:0003677|DNA binding;GO:0046872|metal ion binding;	NA	NA	NA
AABR07056526.1	1	0	0	1	2	0	1	1	4	ENSRNOG00000061681	120094020	7	22590766	22590886	-	snRNA	NA	NA	NA	NA	NA	NA
AABR07056556.1	0	0	0	0	0	0	0	0	0	ENSRNOG00000032424	NA	7	23753065	23753559	+	protein_coding	NA	NA	NA	NA	NA	NA
AABR07056611.1	0	0	0	0	0	0	0	0	0	ENSRNOG00000055726	NA	7	25964209	25964541	+	protein_coding	NA	NA	NA	NA	NA	NA
AABR07056613.2	0	0	0	0	0	0	0	0	0	ENSRNOG00000052580	120093956	7	26059317	26059438	-	snoRNA	NA	NA	NA	NA	NA	NA
AABR07056632.1	1	0	1	5	1	5	0	0	4	ENSRNOG00000058804	120094015	7	27236889	27237031	-	snoRNA	NA	NA	NA	NA	NA	NA
AABR07056633.1	1	3	3	4	3	6	14	2	18	ENSRNOG00000024494	314740	7	27316502	27602144	-	protein_coding	GO:0007283|spermatogenesis;GO:0044458|motile cilium assembly;GO:0051649|establishment of localization in cell;GO:0060271|cilium assembly;GO:0060294|cilium movement involved in cell motility;GO:0090660|cerebrospinal fluid circulation;GO:0120197|mucociliary clearance;GO:0120316|sperm flagellum assembly;	GO:0005576|extracellular region;	NA	NA	NA	NA
AABR07056668.1	0	0	0	0	0	0	0	0	0	ENSRNOG00000029926	NA	X	92301983	92302360	+	protein_coding	NA	NA	NA	NA	NA	NA
AABR07056686.1	22	15	21	16	13	17	6	9	27	ENSRNOG00000021688	314759	7	30370154	30370588	+	protein_coding	NA	NA	NA	NA	NA	NA
AABR07056691.1	0	0	0	0	0	0	0	0	0	ENSRNOG00000053921	120093990	7	30557822	30557964	+	snoRNA	NA	NA	NA	NA	NA	NA
AABR07056732.1	0	0	0	0	0	0	0	0	0	ENSRNOG00000056885	120093993	7	32529240	32529384	-	snoRNA	NA	NA	NA	NA	NA	NA
AABR07056845.1	2	1	0	0	0	0	0	1	0	ENSRNOG00000023762	NA	7	37066520	37067514	+	protein_coding	NA	NA	NA	NA	NA	NA
AABR07056884.1	0	0	0	0	0	0	0	0	0	ENSRNOG00000057777	120094005	7	38282183	38282302	+	snoRNA	NA	NA	NA	NA	NA	NA
AABR07056887.1	0	0	0	0	0	0	0	0	0	ENSRNOG00000055100	120093967	7	38564128	38564271	+	snoRNA	NA	NA	NA	NA	NA	NA
AABR07056919.1	0	0	0	0	0	0	0	0	0	ENSRNOG00000060330	120094000	7	40344575	40344707	-	snoRNA	NA	NA	NA	NA	NA	NA
AABR07056962.1	0	0	0	0	0	0	0	0	0	ENSRNOG00000055273	120094001	7	42459860	42459990	+	snoRNA	NA	NA	NA	NA	NA	NA
AABR07057163.1	1	0	0	0	0	0	0	0	1	ENSRNOG00000060257	120093959	7	51019108	51019230	-	snoRNA	NA	NA	NA	NA	NA	NA
AABR07057170.1	0	0	0	0	0	0	0	0	0	ENSRNOG00000057981	NA	7	51203872	51216114	+	pseudogene	NA	NA	NA	NA	NA	NA
AABR07057196.1	218	172	195	148	183	158	101	95	121	ENSRNOG00000005546	689014	7	52669875	52671676	+	protein_coding	GO:0008033|tRNA processing;	NA	GO:0005525|GTP binding;GO:0008452|RNA ligase activity;GO:0046872|metal ion binding;	NA	NA	NA
AABR07057217.1	0	0	0	0	0	0	0	0	0	ENSRNOG00000025487	NA	7	53553378	53553986	-	protein_coding	NA	NA	NA	NA	NA	NA
AABR07057237.1	0	0	0	0	0	0	0	0	0	ENSRNOG00000026875	100362798	7	54875144	54875314	-	protein_coding	GO:0006122|mitochondrial electron transport, ubiquinol to cytochrome c;	GO:0005750|mitochondrial respiratory chain complex III;	NA	NA	NA	NA
AABR07057264.1	0	0	0	0	0	0	0	0	0	ENSRNOG00000030441	299823	7	56772646	56773155	+	protein_coding	NA	NA	NA	NA	NA	NA
AABR07057304.2	0	0	0	0	0	0	0	0	0	ENSRNOG00000060815	120093989	7	56119254	56119374	+	snoRNA	NA	NA	NA	NA	NA	NA
AABR07057353.2	0	0	0	0	0	0	0	0	0	ENSRNOG00000056727	NA	7	58338860	58338957	+	miRNA	NA	NA	NA	NA	NA	NA
AABR07057415.3	0	0	0	0	0	0	0	0	0	ENSRNOG00000057424	120093981	7	62682424	62682554	-	snoRNA	NA	NA	NA	NA	NA	NA
AABR07057423.1	199	165	186	181	181	129	209	200	229	ENSRNOG00000046245	679272	7	62879018	62882495	-	protein_coding	GO:0016567|protein ubiquitination;	GO:0005795|Golgi stack;GO:0005802|trans-Golgi network;GO:0016020|membrane;	GO:0008270|zinc ion binding;	NA	NA	NA
AABR07057436.1	0	0	0	0	0	0	0	0	0	ENSRNOG00000004391	360420	7	63675579	63689392	-	protein_coding	GO:0008202|steroid metabolic process;GO:0042572|retinol metabolic process;	GO:0005783|endoplasmic reticulum;GO:0043231|intracellular membrane-bounded organelle;	GO:0004745|NAD-retinol dehydrogenase activity;GO:0016491|oxidoreductase activity;	K11154|retinol dehydrogenase 16 [EC:1.1.1.-];K11154|retinol dehydrogenase 16 [EC:1.1.1.-];	rno00830;rno01100;	Retinol metabolism;Metabolic pathways;
AABR07057438.1	3	1	2	2	6	0	0	1	0	ENSRNOG00000033952	NA	7	63949734	63951518	-	protein_coding	NA	NA	NA	NA	NA	NA
AABR07057460.1	3	4	2	2	2	4	3	6	9	ENSRNOG00000014169	314556	7	65143209	65143667	+	protein_coding	GO:0006412|translation;	NA	GO:0003723|RNA binding;GO:0003735|structural constituent of ribosome;	NA	NA	NA
AABR07057491.1	7	10	10	4	4	7	19	8	7	ENSRNOG00000051838	NA	7	66764632	66767075	-	pseudogene	NA	NA	NA	NA	NA	NA
AABR07057617.1	0	0	0	0	0	0	0	1	0	ENSRNOG00000057824	120093809	7	72632148	72632531	-	protein_coding	NA	NA	NA	NA	NA	NA
AABR07057620.1	0	0	0	0	0	0	0	0	0	ENSRNOG00000051692	120093954	7	72993142	72993230	-	snoRNA	NA	NA	NA	NA	NA	NA
AABR07057621.1	0	0	0	0	0	0	0	0	0	ENSRNOG00000059305	120094010	7	73044144	73044260	+	snoRNA	NA	NA	NA	NA	NA	NA
AABR07057765.2	0	0	0	0	0	0	0	0	0	ENSRNOG00000051790	120093991	7	78995596	78995719	+	snoRNA	NA	NA	NA	NA	NA	NA
AABR07057804.1	0	0	0	0	0	0	0	0	0	ENSRNOG00000057004	120094013	7	80130893	80131008	+	snoRNA	NA	NA	NA	NA	NA	NA
AABR07057877.1	0	0	0	0	0	0	0	0	0	ENSRNOG00000028988	100363319	7	83520046	83520312	-	protein_coding	NA	GO:0000785|chromatin;	GO:0031492|nucleosomal DNA binding;	NA	NA	NA
AABR07057902.1	0	0	0	0	0	0	0	0	0	ENSRNOG00000013191	120093654	7	85155790	85156323	+	protein_coding	NA	NA	NA	NA	NA	NA
AABR07057946.1	0	0	1	0	0	0	0	0	0	ENSRNOG00000058406	NA	7	86687128	86687382	+	processed_pseudogene	NA	NA	NA	NA	NA	NA
AABR07057997.1	3	5	5	6	4	3	3	5	6	ENSRNOG00000054801	NA	7	89067244	89129146	-	lncRNA	NA	NA	NA	NA	NA	NA
AABR07058005.1	0	0	0	0	0	0	0	0	0	ENSRNOG00000058707	120094017	7	89691782	89691908	+	snoRNA	NA	NA	NA	NA	NA	NA
AABR07058017.2	11	6	4	4	6	7	5	14	8	ENSRNOG00000053624	NA	7	90386604	90406762	-	lncRNA	NA	NA	NA	NA	NA	NA
AABR07058116.1	0	0	0	0	0	0	0	0	0	ENSRNOG00000004906	299964	7	91940260	91942559	+	protein_coding	GO:0005975|carbohydrate metabolic process;GO:0046168|glycerol-3-phosphate catabolic process;	GO:0009331|glycerol-3-phosphate dehydrogenase complex;	GO:0042803|protein homodimerization activity;GO:0047952|glycerol-3-phosphate dehydrogenase [NAD(P)+] activity;GO:0051287|NAD binding;	NA	NA	NA
AABR07058124.2	2	0	1	0	1	0	0	0	0	ENSRNOG00000037549	NA	7	92314562	92317941	+	protein_coding	NA	NA	NA	NA	NA	NA
AABR07058169.1	0	0	2	0	0	0	0	0	0	ENSRNOG00000059070	120094019	7	94246657	94246771	+	snRNA	NA	NA	NA	NA	NA	NA
AABR07058173.2	0	0	0	0	0	0	0	0	0	ENSRNOG00000057624	120094009	7	94457096	94457229	+	snoRNA	NA	NA	NA	NA	NA	NA
AABR07058233.1	0	0	0	0	0	0	0	0	0	ENSRNOG00000057420	120093969	7	96825118	96825259	-	snoRNA	NA	NA	NA	NA	NA	NA
AABR07058254.1	0	0	0	0	0	0	0	0	0	ENSRNOG00000054588	120093074	7	97674538	97711308	-	protein_coding	NA	NA	NA	NA	NA	NA
AABR07058261.1	0	0	0	0	0	0	0	0	0	ENSRNOG00000062301	120093880	7	98273546	98274427	+	processed_pseudogene	NA	NA	NA	NA	NA	NA
AABR07058284.1	0	0	1	0	1	0	0	0	0	ENSRNOG00000062233	NA	7	99412152	99413276	+	protein_coding	NA	NA	NA	NA	NA	NA
AABR07058329.1	0	0	0	0	0	0	0	0	0	ENSRNOG00000059423	120094008	7	101325223	101325349	-	snoRNA	NA	NA	NA	NA	NA	NA
AABR07058360.1	0	0	0	0	1	0	0	0	0	ENSRNOG00000031474	NA	7	102435666	102436278	-	protein_coding	NA	NA	NA	NA	NA	NA
AABR07058366.1	3	2	3	0	1	1	2	6	6	ENSRNOG00000025046	NA	7	114359271	114360675	-	protein_coding	NA	NA	NA	NA	NA	NA
AABR07058403.1	0	0	0	0	0	0	0	0	0	ENSRNOG00000055237	120093952	7	105272233	105272369	+	snoRNA	NA	NA	NA	NA	NA	NA
AABR07058406.1	0	0	0	0	0	0	0	0	0	ENSRNOG00000059955	300001	7	105381476	105381811	-	protein_coding	NA	NA	NA	NA	NA	NA
AABR07058412.1	0	0	0	0	0	0	0	0	0	ENSRNOG00000032827	500889	7	105662744	105730060	-	protein_coding	NA	NA	NA	NA	NA	NA
AABR07058413.1	0	0	0	0	0	0	0	0	0	ENSRNOG00000037401	315051	7	105805054	105805539	-	protein_coding	GO:0006412|translation;	GO:0005840|ribosome;GO:1990904|ribonucleoprotein complex;	GO:0003735|structural constituent of ribosome;	NA	NA	NA
AABR07058423.3	0	0	0	0	0	0	0	0	0	ENSRNOG00000051265	NA	19	38754265	38755406	+	protein_coding	NA	NA	NA	NA	NA	NA
AABR07058441.1	0	0	0	0	0	0	0	0	0	ENSRNOG00000048850	300024	7	107011623	107015179	-	protein_coding	NA	NA	NA	NA	NA	NA
AABR07058464.1	14	18	26	17	17	8	186	200	183	ENSRNOG00000052981	108351606	7	109131064	109147649	-	protein_coding	GO:0006869|lipid transport;GO:0042157|lipoprotein metabolic process;	GO:0005576|extracellular region;	GO:0008289|lipid binding;	NA	NA	NA
AABR07058476.1	0	0	0	0	0	0	0	0	0	ENSRNOG00000023122	300060	7	109248942	109253716	-	protein_coding	GO:0006869|lipid transport;GO:0042157|lipoprotein metabolic process;	GO:0005576|extracellular region;	NA	NA	NA	NA
AABR07058479.1	0	0	0	0	0	0	0	1	0	ENSRNOG00000047414	NA	7	109157933	109175591	-	protein_coding	NA	NA	NA	NA	NA	NA
AABR07058484.1	0	0	0	0	0	0	0	0	0	ENSRNOG00000053482	120094023	7	109475385	109475522	+	snoRNA	NA	NA	NA	NA	NA	NA
AABR07058514.2	0	0	0	0	0	0	0	0	0	ENSRNOG00000052218	120093994	7	112000881	112001015	-	snoRNA	NA	NA	NA	NA	NA	NA
AABR07058519.1	8	9	10	1	6	9	5	18	16	ENSRNOG00000032777	685704	7	112264153	112264590	-	protein_coding	NA	NA	NA	NA	NA	NA
AABR07058578.1	0	1	0	0	0	2	0	0	0	ENSRNOG00000029243	500914	7	115720028	115720516	-	protein_coding	NA	NA	NA	NA	NA	NA
AABR07058578.2	0	0	0	1	0	0	0	0	0	ENSRNOG00000060017	NA	7	115841830	115843188	-	lncRNA	NA	NA	NA	NA	NA	NA
AABR07058615.1	9	17	11	11	5	11	0	7	10	ENSRNOG00000004457	300135	7	118084696	118085850	+	protein_coding	NA	NA	NA	NA	NA	NA
AABR07058706.1	0	1	0	0	0	0	1	1	2	ENSRNOG00000053692	120093951	7	123941058	123941188	+	snoRNA	NA	NA	NA	NA	NA	NA
AABR07058745.1	0	0	0	0	0	0	0	0	0	ENSRNOG00000050884	NA	7	123059219	123107765	+	protein_coding	NA	NA	NA	NA	NA	NA
AABR07058831.1	49	41	47	55	53	49	88	52	96	ENSRNOG00000002475	500923	7	128577102	128577620	-	protein_coding	NA	NA	NA	NA	NA	NA
AABR07058899.1	1	0	0	0	1	0	0	1	0	ENSRNOG00000053802	NA	7	131539960	131542385	+	protein_coding	NA	NA	NA	NA	NA	NA
AABR07058914.1	4	4	10	6	1	6	4	9	10	ENSRNOG00000032026	102555469	7	132162390	132164336	-	protein_coding	NA	NA	GO:0005524|ATP binding;GO:0016887|ATP hydrolysis activity;	NA	NA	NA
AABR07058934.1	5	4	1	2	0	0	0	2	3	ENSRNOG00000016100	NA	7	134031240	134031542	+	protein_coding	NA	NA	NA	NA	NA	NA
AABR07058937.1	0	0	0	0	0	0	0	0	0	ENSRNOG00000036836	NA	7	134396328	134396942	-	protein_coding	NA	NA	NA	NA	NA	NA
AABR07059002.1	0	0	0	0	0	0	0	0	0	ENSRNOG00000056565	NA	4	6945496	6952395	-	lncRNA	NA	NA	NA	NA	NA	NA
AABR07059161.1	0	1	0	0	2	0	0	0	0	ENSRNOG00000051942	NA	4	9471163	9472422	+	protein_coding	NA	NA	NA	NA	NA	NA
AABR07059168.1	0	0	0	0	0	0	0	0	0	ENSRNOG00000053553	NA	4	9870841	9871142	+	pseudogene	NA	NA	NA	NA	NA	NA
AABR07059215.1	0	0	0	0	0	0	0	0	0	ENSRNOG00000031486	NA	4	12430745	12448334	-	protein_coding	NA	NA	NA	NA	NA	NA
AABR07059220.1	0	0	0	0	0	0	0	0	0	ENSRNOG00000051718	120102692	4	12720684	12720803	+	snoRNA	NA	NA	NA	NA	NA	NA
AABR07059227.1	0	0	0	0	0	0	0	0	0	ENSRNOG00000061330	120102659	4	13496986	13497113	+	snoRNA	NA	NA	NA	NA	NA	NA
AABR07059228.1	0	0	0	0	0	0	0	1	0	ENSRNOG00000061010	120102739	4	13555824	13555909	+	snoRNA	NA	NA	NA	NA	NA	NA
AABR07059232.1	183	129	147	142	147	151	44	51	75	ENSRNOG00000048371	499979	4	13608464	13662967	-	protein_coding	NA	NA	NA	NA	NA	NA
AABR07059249.1	0	0	0	0	0	0	0	0	0	ENSRNOG00000053390	120102678	4	14948787	14948916	+	snoRNA	NA	NA	NA	NA	NA	NA
AABR07059322.1	0	0	0	0	0	0	0	0	0	ENSRNOG00000055703	120102685	4	18073298	18073422	-	snoRNA	NA	NA	NA	NA	NA	NA
AABR07059449.1	0	0	0	0	0	0	0	0	0	ENSRNOG00000056402	120102627	4	23084067	23084203	+	snoRNA	NA	NA	NA	NA	NA	NA
AABR07059478.1	0	0	0	0	0	0	0	0	0	ENSRNOG00000047774	NA	4	24093804	24094214	-	protein_coding	NA	NA	NA	NA	NA	NA
AABR07059498.1	0	0	0	0	0	0	0	0	0	ENSRNOG00000055165	120102070	3	65632244	65632364	+	snoRNA	NA	NA	NA	NA	NA	NA
AABR07059632.3	494	442	502	497	439	405	294	304	380	ENSRNOG00000061046	500010	4	31081006	31085469	-	protein_coding	NA	NA	NA	NA	NA	NA
AABR07059663.1	4	2	6	4	4	2	4	7	10	ENSRNOG00000051922	NA	4	31268252	31273662	-	pseudogene	NA	NA	NA	NA	NA	NA
AABR07059757.1	0	0	0	0	0	0	0	0	0	ENSRNOG00000051445	120102629	4	35969727	35969848	+	snoRNA	NA	NA	NA	NA	NA	NA
AABR07059807.1	1	1	0	1	1	0	1	1	1	ENSRNOG00000047566	680964	4	38605721	38606011	-	protein_coding	NA	GO:0000785|chromatin;GO:0005634|nucleus;	GO:0031492|nucleosomal DNA binding;	NA	NA	NA
AABR07059838.1	0	0	0	0	0	0	0	0	0	ENSRNOG00000055593	120102694	4	39733941	39734060	+	snoRNA	NA	NA	NA	NA	NA	NA
AABR07059850.1	0	0	0	0	0	0	0	0	0	ENSRNOG00000056499	120102687	4	40309057	40309173	+	snoRNA	NA	NA	NA	NA	NA	NA
AABR07059877.1	0	0	0	0	0	0	0	0	0	ENSRNOG00000039626	NA	4	41548914	41549455	-	protein_coding	NA	NA	NA	NA	NA	NA
AABR07059882.1	0	0	0	0	0	0	0	0	0	ENSRNOG00000059639	120102634	4	41869435	41869561	-	snoRNA	NA	NA	NA	NA	NA	NA
AABR07059900.2	0	0	0	0	0	0	0	0	0	ENSRNOG00000056090	120102706	4	42398832	42398962	+	snoRNA	NA	NA	NA	NA	NA	NA
AABR07059925.1	3	1	1	2	2	0	1	0	1	ENSRNOG00000052702	500039	4	44966627	44967325	+	protein_coding	GO:0006172|ADP biosynthetic process;GO:0016310|phosphorylation;GO:0046033|AMP metabolic process;GO:0046034|ATP metabolic process;GO:0046940|nucleoside monophosphate phosphorylation;	GO:0005758|mitochondrial intermembrane space;	GO:0004017|adenylate kinase activity;GO:0005524|ATP binding;	NA	NA	NA
AABR07060071.1	0	0	0	0	0	0	0	0	0	ENSRNOG00000060151	120102695	4	53696586	53696709	-	snoRNA	NA	NA	NA	NA	NA	NA
AABR07060119.1	0	0	0	0	0	0	0	0	0	ENSRNOG00000055602	120102640	4	58951393	58951489	-	snoRNA	NA	NA	NA	NA	NA	NA
AABR07060145.1	3	1	6	2	2	0	1	2	4	ENSRNOG00000032847	502741	4	60296410	60296622	-	protein_coding	GO:0006412|translation;	NA	NA	NA	NA	NA
AABR07060233.1	0	0	0	0	0	0	0	0	0	ENSRNOG00000054211	120102671	4	64580714	64580842	+	snoRNA	NA	NA	NA	NA	NA	NA
AABR07060293.1	14	12	8	11	10	7	12	13	35	ENSRNOG00000027445	120102490	4	67330588	67331346	-	protein_coding	NA	NA	NA	NA	NA	NA
AABR07060298.1	0	0	0	0	0	0	0	0	0	ENSRNOG00000060861	120102680	4	67767305	67767435	+	snoRNA	NA	NA	NA	NA	NA	NA
AABR07060353.2	0	0	0	0	0	0	0	0	0	ENSRNOG00000043164	NA	4	70058474	70059286	+	protein_coding	NA	NA	NA	NA	NA	NA
AABR07060493.1	0	0	0	0	0	0	0	0	0	ENSRNOG00000053912	120102681	4	75575980	75576108	-	snoRNA	NA	NA	NA	NA	NA	NA
AABR07060577.1	0	0	0	0	0	0	1	0	0	ENSRNOG00000015328	NA	4	80602895	80603836	+	protein_coding	NA	NA	NA	NA	NA	NA
AABR07060591.1	0	0	0	0	0	0	0	0	0	ENSRNOG00000059195	NA	4	81709907	81713718	+	protein_coding	NA	NA	NA	NA	NA	NA
AABR07060593.1	1	0	0	0	1	0	0	0	0	ENSRNOG00000008611	NA	4	82141262	82141967	+	pseudogene	NA	NA	NA	NA	NA	NA
AABR07060610.1	8	18	11	6	9	9	11	20	21	ENSRNOG00000033748	NA	4	84151737	84152477	+	protein_coding	NA	NA	NA	NA	NA	NA
AABR07060620.2	0	0	0	0	0	0	0	0	0	ENSRNOG00000057142	120102688	4	85813358	85813483	-	snoRNA	NA	NA	NA	NA	NA	NA
AABR07060628.1	0	0	0	0	0	0	0	0	0	ENSRNOG00000051748	NA	4	86217229	86218298	+	pseudogene	NA	NA	NA	NA	NA	NA
AABR07060680.1	0	0	0	0	0	0	0	0	0	ENSRNOG00000056505	120102697	4	88240639	88240769	+	snoRNA	NA	NA	NA	NA	NA	NA
AABR07060694.1	0	0	0	0	0	0	0	0	0	ENSRNOG00000057158	NA	4	88957348	88959953	+	protein_coding	NA	NA	NA	NA	NA	NA
AABR07060700.1	0	0	0	0	0	0	0	0	0	ENSRNOG00000060808	NA	4	89048327	89049391	+	protein_coding	NA	NA	NA	NA	NA	NA
AABR07060778.1	181	164	152	155	216	212	105	103	189	ENSRNOG00000005630	690660	4	92100973	92101568	-	protein_coding	GO:0006886|intracellular protein transport;GO:0006888|endoplasmic reticulum to Golgi vesicle-mediated transport;GO:0006900|vesicle budding from membrane;	NA	GO:0000166|nucleotide binding;	NA	NA	NA
AABR07060833.2	0	0	0	0	0	0	0	0	0	ENSRNOG00000052715	120102726	4	94993118	94993219	-	snoRNA	NA	NA	NA	NA	NA	NA
AABR07060872.1	0	0	0	1	0	0	0	0	0	ENSRNOG00000049829	NA	4	102404346	102688488	+	protein_coding	NA	NA	NA	NA	NA	NA
AABR07060886.1	0	0	0	0	0	0	0	0	0	ENSRNOG00000047464	100360848	4	102343816	102344432	-	protein_coding	NA	NA	NA	NA	NA	NA
AABR07060915.1	6	4	2	1	1	0	3	2	1	ENSRNOG00000058052	120102632	4	104895641	104895763	-	snoRNA	NA	NA	NA	NA	NA	NA
AABR07060960.1	0	0	0	0	0	0	0	0	0	ENSRNOG00000058403	120102732	4	97154880	97155000	-	snoRNA	NA	NA	NA	NA	NA	NA
AABR07060962.1	0	0	0	0	0	0	0	0	0	ENSRNOG00000054341	120102736	4	97175028	97175121	-	snoRNA	NA	NA	NA	NA	NA	NA
AABR07060963.1	0	0	0	0	0	0	0	0	0	ENSRNOG00000051717	120102704	4	97229655	97229787	-	snoRNA	NA	NA	NA	NA	NA	NA
AABR07060971.1	0	0	0	0	0	0	0	0	0	ENSRNOG00000054428	NA	4	97380738	97381526	+	protein_coding	NA	NA	NA	NA	NA	NA
AABR07060979.2	0	0	0	0	0	0	0	0	0	ENSRNOG00000054741	120102716	4	97576660	97576791	-	snoRNA	NA	NA	NA	NA	NA	NA
AABR07060980.1	0	0	0	0	0	0	0	0	0	ENSRNOG00000056052	108349283	4	97585462	97586146	+	protein_coding	NA	NA	NA	NA	NA	NA
AABR07060996.1	0	0	0	0	0	0	0	0	0	ENSRNOG00000048888	103690609	4	97828768	97829070	+	protein_coding	GO:0022900|electron transport chain;	NA	NA	NA	NA	NA
AABR07061001.1	0	0	0	0	0	0	0	0	0	ENSRNOG00000051739	362382	4	97870038	97870535	+	protein_coding	NA	NA	NA	NA	NA	NA
AABR07061014.1	0	0	0	0	0	0	0	0	0	ENSRNOG00000061234	120102731	4	97480517	97480618	-	snoRNA	NA	NA	NA	NA	NA	NA
AABR07061030.1	0	0	0	0	0	0	0	0	0	ENSRNOG00000052849	120102725	4	98583972	98584104	+	snoRNA	NA	NA	NA	NA	NA	NA
AABR07061136.1	0	0	0	0	0	0	0	0	0	ENSRNOG00000033938	NA	4	98643366	98643707	+	protein_coding	NA	NA	NA	NA	NA	NA
AABR07061139.1	0	0	0	0	0	0	0	0	0	ENSRNOG00000052747	120102720	4	108118729	108118852	+	snoRNA	NA	NA	NA	NA	NA	NA
AABR07061152.1	0	0	0	0	0	0	0	0	0	ENSRNOG00000005867	NA	4	108405707	108406249	-	processed_pseudogene	NA	NA	NA	NA	NA	NA
AABR07061187.1	0	0	0	0	0	0	0	0	0	ENSRNOG00000060570	120102644	4	110662076	110662209	-	snRNA	NA	NA	NA	NA	NA	NA
AABR07061254.1	3	0	2	2	1	1	0	1	4	ENSRNOG00000038024	NA	4	114189975	114190379	-	protein_coding	NA	NA	NA	NA	NA	NA
AABR07061260.1	0	0	0	0	0	0	0	0	0	ENSRNOG00000059631	120102677	4	114390354	114390483	+	snoRNA	NA	NA	NA	NA	NA	NA
AABR07061279.1	0	0	0	0	0	0	0	0	0	ENSRNOG00000061103	120102709	4	111773083	111773205	+	snoRNA	NA	NA	NA	NA	NA	NA
AABR07061286.1	0	0	0	0	0	0	0	0	0	ENSRNOG00000055249	120102643	4	111475412	111475543	-	snoRNA	NA	NA	NA	NA	NA	NA
AABR07061310.1	6	7	13	10	5	4	14	9	15	ENSRNOG00000060457	120102633	4	116471399	116471527	+	snoRNA	NA	NA	NA	NA	NA	NA
AABR07061328.2	0	0	0	0	0	0	0	0	0	ENSRNOG00000057170	120102669	4	117587214	117587345	-	snoRNA	NA	NA	NA	NA	NA	NA
AABR07061333.3	0	0	0	0	0	0	0	0	0	ENSRNOG00000058095	120102708	4	117652870	117652993	-	snoRNA	NA	NA	NA	NA	NA	NA
AABR07061335.1	0	0	0	0	0	0	0	0	0	ENSRNOG00000060772	120102711	4	117685079	117685209	+	snoRNA	NA	NA	NA	NA	NA	NA
AABR07061382.3	0	1	0	0	0	0	0	0	0	ENSRNOG00000060660	120102642	4	120707367	120707503	-	snoRNA	NA	NA	NA	NA	NA	NA
AABR07061385.2	0	0	0	0	0	1	0	0	0	ENSRNOG00000060843	NA	4	121605127	121610076	+	protein_coding	NA	NA	NA	NA	NA	NA
AABR07061412.1	0	0	0	0	0	0	0	0	0	ENSRNOG00000019158	100312762	4	122686973	122687884	-	pseudogene	NA	NA	NA	NA	NA	NA
AABR07061451.1	0	0	0	0	0	0	0	0	0	ENSRNOG00000060795	120102703	4	126026597	126026707	+	snoRNA	NA	NA	NA	NA	NA	NA
AABR07061507.1	0	0	0	0	0	0	0	0	0	ENSRNOG00000058065	120102724	4	130392379	130392510	+	snoRNA	NA	NA	NA	NA	NA	NA
AABR07061532.1	0	0	0	0	0	0	0	0	0	ENSRNOG00000033673	120102174	4	132485337	132485684	-	protein_coding	GO:0007165|signal transduction;	NA	NA	NA	NA	NA
AABR07061594.1	0	0	0	0	0	0	0	0	0	ENSRNOG00000057018	120102641	4	135361243	135361421	+	scaRNA	NA	NA	NA	NA	NA	NA
AABR07061614.1	0	0	0	0	0	0	1	0	0	ENSRNOG00000032820	NA	4	136953750	136954480	-	protein_coding	NA	NA	NA	NA	NA	NA
AABR07061614.2	0	0	0	0	0	0	0	0	0	ENSRNOG00000051914	120102718	4	137032326	137032442	+	snoRNA	NA	NA	NA	NA	NA	NA
AABR07061614.3	0	0	0	1	0	0	0	0	0	ENSRNOG00000053654	NA	4	137094419	137096293	-	pseudogene	NA	NA	NA	NA	NA	NA
AABR07061688.1	0	0	0	0	0	0	0	0	0	ENSRNOG00000053149	120102689	4	140680625	140680738	+	snoRNA	NA	NA	NA	NA	NA	NA
AABR07061707.1	0	0	0	0	0	0	0	0	0	ENSRNOG00000052718	NA	4	141433461	141433673	-	protein_coding	NA	NA	NA	NA	NA	NA
AABR07061820.1	0	0	0	0	0	0	0	0	0	ENSRNOG00000055065	120102730	4	148787387	148787491	-	snoRNA	NA	NA	NA	NA	NA	NA
AABR07061825.1	218	183	190	166	160	165	115	97	108	ENSRNOG00000011606	680385	4	149078162	149079657	+	protein_coding	NA	GO:1990904|ribonucleoprotein complex;	NA	NA	NA	NA
AABR07061825.2	11	14	19	9	12	9	10	11	2	ENSRNOG00000059964	NA	4	149066692	149066919	-	protein_coding	NA	NA	NA	NA	NA	NA
AABR07061838.1	0	0	0	0	0	0	0	0	0	ENSRNOG00000033439	680441	4	149492385	149492849	-	protein_coding	GO:0006412|translation;	NA	NA	NA	NA	NA
AABR07061842.2	0	0	0	0	0	0	0	0	0	ENSRNOG00000053237	120102672	4	150004608	150004742	-	snoRNA	NA	NA	NA	NA	NA	NA
AABR07061869.1	4	2	6	5	3	2	10	2	13	ENSRNOG00000052131	120102660	4	151283431	151283559	-	snoRNA	NA	NA	NA	NA	NA	NA
AABR07061871.2	0	0	0	0	0	0	0	0	0	ENSRNOG00000042507	681193	4	5743067	5743270	+	protein_coding	GO:0006351|DNA-templated transcription;	GO:0000428|DNA-directed RNA polymerase complex;	GO:0003677|DNA binding;GO:0003899|DNA-directed 5'-3' RNA polymerase activity;GO:0008270|zinc ion binding;	K03007|DNA-directed RNA polymerases I, II, and III subunit RPABC5;K03007|DNA-directed RNA polymerases I, II, and III subunit RPABC5;K03007|DNA-directed RNA polymerases I, II, and III subunit RPABC5;K03007|DNA-directed RNA polymerases I, II, and III subunit RPABC5;	rno03020;rno03420;rno04623;rno05016;	RNA polymerase;Nucleotide excision repair;Cytosolic DNA-sensing pathway;Huntington disease;
AABR07061902.1	0	0	0	0	0	0	0	0	0	ENSRNOG00000000021	NA	17	73658276	73659481	-	protein_coding	NA	NA	NA	NA	NA	NA
AABR07061964.1	0	0	0	0	0	0	0	0	0	ENSRNOG00000057550	NA	4	155620068	155620259	+	processed_pseudogene	NA	NA	NA	NA	NA	NA
AABR07062023.1	0	0	0	0	0	0	0	0	0	ENSRNOG00000057743	120102683	4	156849122	156849249	+	snoRNA	NA	NA	NA	NA	NA	NA
AABR07062026.1	0	0	0	0	0	0	0	0	0	ENSRNOG00000054974	NA	4	157058193	157071348	+	lncRNA	NA	NA	NA	NA	NA	NA
AABR07062026.2	0	0	0	0	0	0	0	0	0	ENSRNOG00000061810	120102684	4	157084756	157084883	-	snoRNA	NA	NA	NA	NA	NA	NA
AABR07062136.1	1	0	1	2	0	1	1	0	0	ENSRNOG00000027063	NA	4	162284267	162284665	-	protein_coding	NA	NA	NA	NA	NA	NA
AABR07062138.1	0	1	0	0	2	0	2	3	1	ENSRNOG00000030902	688980	4	162337682	162338233	-	protein_coding	NA	GO:0005634|nucleus;	NA	NA	NA	NA
AABR07062138.2	25	28	20	33	16	15	57	28	51	ENSRNOG00000055966	689800	4	162296007	162339892	+	protein_coding	NA	GO:0016020|membrane;	NA	NA	NA	NA
AABR07062154.1	11	7	8	18	22	16	18	10	7	ENSRNOG00000061420	NA	4	162513287	162515951	-	protein_coding	NA	NA	NA	NA	NA	NA
AABR07062211.1	0	0	0	0	0	0	0	0	0	ENSRNOG00000061664	502908	4	164697533	164719650	-	protein_coding	NA	GO:0005886|plasma membrane;	NA	NA	NA	NA
AABR07062238.1	0	0	0	0	0	0	0	0	0	ENSRNOG00000005383	297671	4	165737710	165740304	+	protein_coding	NA	NA	NA	NA	NA	NA
AABR07062289.1	0	0	0	0	0	0	0	0	0	ENSRNOG00000055734	100362996	4	166000937	166001846	-	pseudogene	NA	NA	NA	NA	NA	NA
AABR07062298.1	0	0	0	0	0	0	0	0	0	ENSRNOG00000052024	NA	4	166688924	166693523	+	protein_coding	NA	NA	NA	NA	NA	NA
AABR07062314.1	0	0	0	0	0	0	0	0	0	ENSRNOG00000060592	120102686	4	167111232	167111361	-	snoRNA	NA	NA	NA	NA	NA	NA
AABR07062323.1	3	1	2	3	0	3	2	6	5	ENSRNOG00000053414	120102674	4	167986914	167987036	+	snoRNA	NA	NA	NA	NA	NA	NA
AABR07062333.1	0	0	0	0	0	0	0	0	0	ENSRNOG00000056544	120102631	4	168442805	168442931	+	snoRNA	NA	NA	NA	NA	NA	NA
AABR07062350.1	1	0	3	3	0	0	3	0	1	ENSRNOG00000053476	NA	4	169351795	169385811	-	lncRNA	NA	NA	NA	NA	NA	NA
AABR07062390.2	0	0	0	0	0	0	0	0	0	ENSRNOG00000055056	NA	4	122580135	122581027	-	pseudogene	NA	NA	NA	NA	NA	NA
AABR07062438.1	0	0	0	0	0	0	0	0	0	ENSRNOG00000060415	120102719	4	174964373	174964496	+	snoRNA	NA	NA	NA	NA	NA	NA
AABR07062454.1	0	0	0	0	0	0	0	0	0	ENSRNOG00000058905	120102662	4	176438218	176438347	-	snoRNA	NA	NA	NA	NA	NA	NA
AABR07062466.1	13	4	4	0	3	3	5	3	7	ENSRNOG00000033855	NA	4	177336069	177336633	+	protein_coding	NA	NA	NA	NA	NA	NA
AABR07062477.3	0	0	0	0	0	0	0	0	0	ENSRNOG00000059511	120102693	4	177759488	177759624	-	snoRNA	NA	NA	NA	NA	NA	NA
AABR07062492.1	0	0	0	0	0	0	0	0	0	ENSRNOG00000059471	120102714	4	178434584	178434696	+	snoRNA	NA	NA	NA	NA	NA	NA
AABR07062513.1	0	0	0	0	0	0	0	0	0	ENSRNOG00000052942	NA	4	179419951	179434661	-	lncRNA	NA	NA	NA	NA	NA	NA
AABR07062539.1	0	0	0	0	0	0	0	0	0	ENSRNOG00000051667	NA	4	180151571	180152387	+	protein_coding	NA	NA	NA	NA	NA	NA
AABR07062570.1	1061	856	1037	894	937	868	541	537	469	ENSRNOG00000056041	686774	4	181729220	181793161	-	protein_coding	NA	NA	GO:0031267|small GTPase binding;	K18755|importin-8;	rno03013;	Nucleocytoplasmic transport;
AABR07062670.1	0	0	0	0	0	0	0	0	0	ENSRNOG00000015559	NA	6	15126885	15127526	+	protein_coding	NA	NA	NA	NA	NA	NA
AABR07062730.1	0	0	0	0	0	0	0	0	0	ENSRNOG00000055656	120093453	6	12594631	12594762	+	snoRNA	NA	NA	NA	NA	NA	NA
AABR07062753.1	19	18	19	18	17	16	8	12	6	ENSRNOG00000004199	NA	6	11713966	11714477	-	protein_coding	NA	NA	NA	NA	NA	NA
AABR07062833.1	0	1	1	0	0	0	0	0	0	ENSRNOG00000051923	120093413	6	7082416	7082482	-	snoRNA	NA	NA	NA	NA	NA	NA
AABR07062833.3	0	1	0	0	3	1	3	0	0	ENSRNOG00000054705	120093446	6	7084312	7084445	+	snoRNA	NA	NA	NA	NA	NA	NA
AABR07062859.1	0	0	0	2	0	0	0	0	0	ENSRNOG00000031564	366548	6	6362988	6363359	+	protein_coding	NA	GO:0000786|nucleosome;GO:0005634|nucleus;	GO:0030527|structural constituent of chromatin;GO:0046982|protein heterodimerization activity;	NA	NA	NA
AABR07063082.1	35	25	34	25	41	30	67	30	42	ENSRNOG00000031342	NA	6	1714435	1715952	-	protein_coding	NA	NA	NA	NA	NA	NA
AABR07063126.1	0	0	0	0	0	0	0	0	0	ENSRNOG00000002495	NA	6	622719	623441	+	protein_coding	NA	NA	NA	NA	NA	NA
AABR07063197.2	3	0	0	0	0	0	0	0	0	ENSRNOG00000052285	120093429	6	20530645	20530788	-	snoRNA	NA	NA	NA	NA	NA	NA
AABR07063255.1	0	0	0	0	0	0	0	0	0	ENSRNOG00000052183	120093473	6	22291862	22291977	-	snoRNA	NA	NA	NA	NA	NA	NA
AABR07063276.1	0	0	1	0	0	0	0	2	0	ENSRNOG00000049398	NA	6	25008279	25011635	-	protein_coding	NA	NA	NA	NA	NA	NA
AABR07063279.1	465	355	362	358	317	315	438	367	388	ENSRNOG00000051056	100910821	6	25077349	25080675	+	protein_coding	GO:0050728|negative regulation of inflammatory response;GO:0071559|response to transforming growth factor beta;	GO:0005615|extracellular space;GO:0005783|endoplasmic reticulum;GO:0005886|plasma membrane;	NA	NA	NA	NA
AABR07063281.1	691	562	610	645	661	601	470	528	589	ENSRNOG00000057813	116475	6	25081980	25120860	+	protein_coding	GO:0000122|negative regulation of transcription by RNA polymerase II;GO:0001841|neural tube formation;GO:0001843|neural tube closure;GO:0001947|heart looping;GO:0007219|Notch signaling pathway;GO:0007224|smoothened signaling pathway;GO:0007368|determination of left/right symmetry;GO:0007420|brain development;GO:0007507|heart development;GO:0008544|epidermis development;GO:0008589|regulation of sm…	GO:0005634|nucleus;GO:0005929|cilium;GO:0005930|axoneme;GO:0030992|intraciliary transport particle B;GO:0036064|ciliary basal body;GO:0097225|sperm midpiece;GO:0097228|sperm principal piece;GO:0097598|sperm cytoplasmic droplet;	NA	NA	NA	NA
AABR07063323.1	0	0	0	0	0	0	0	0	0	ENSRNOG00000052193	120103497	6	27111331	27111546	+	protein_coding	GO:0006367|transcription initiation at RNA polymerase II promoter;	NA	NA	NA	NA	NA
AABR07063546.1	0	0	0	0	0	0	0	0	0	ENSRNOG00000052462	120093456	6	34769470	34769595	+	snoRNA	NA	NA	NA	NA	NA	NA
AABR07063632.1	0	0	0	2	2	0	8	1	3	ENSRNOG00000029825	NA	1	208874809	208875759	-	protein_coding	NA	NA	NA	NA	NA	NA
AABR07063635.1	0	0	0	0	0	0	0	0	0	ENSRNOG00000055167	120093419	6	35597279	35597405	-	snoRNA	NA	NA	NA	NA	NA	NA
AABR07063703.1	0	0	0	0	0	0	0	0	0	ENSRNOG00000046279	313982	6	40254779	40255666	+	protein_coding	NA	GO:0000776|kinetochore;	NA	NA	NA	NA
AABR07063704.1	0	0	0	0	0	0	0	0	0	ENSRNOG00000032523	120093238	6	40423832	40424203	+	protein_coding	GO:0006412|translation;	NA	NA	NA	NA	NA
AABR07063760.1	0	0	0	0	0	0	0	0	0	ENSRNOG00000056408	120093459	6	44302556	44302686	+	snoRNA	NA	NA	NA	NA	NA	NA
AABR07063771.1	0	0	0	0	0	0	0	0	0	ENSRNOG00000055690	120093466	6	44688794	44688925	-	snoRNA	NA	NA	NA	NA	NA	NA
AABR07063777.1	0	0	0	0	0	0	0	0	0	ENSRNOG00000055363	120093439	6	44948543	44948677	+	snoRNA	NA	NA	NA	NA	NA	NA
AABR07063847.1	0	0	0	0	0	0	0	0	0	ENSRNOG00000054501	120093480	6	49605209	49605327	-	snRNA	NA	NA	NA	NA	NA	NA
AABR07063852.2	0	0	0	0	0	0	0	0	0	ENSRNOG00000059972	120093447	6	50091378	50091506	-	snoRNA	NA	NA	NA	NA	NA	NA
AABR07063855.1	80	98	80	84	83	62	64	51	65	ENSRNOG00000011040	680142	6	50125213	50127038	-	pseudogene	NA	NA	NA	NA	NA	NA
AABR07063860.1	0	0	0	0	0	0	0	0	0	ENSRNOG00000057539	120093452	6	50178978	50179105	+	snoRNA	NA	NA	NA	NA	NA	NA
AABR07063929.2	0	0	0	0	0	0	0	0	0	ENSRNOG00000053907	120093463	6	53116714	53116830	-	snoRNA	NA	NA	NA	NA	NA	NA
AABR07063940.1	0	0	0	0	0	0	0	0	0	ENSRNOG00000052213	120102735	4	156772988	156773105	-	snoRNA	NA	NA	NA	NA	NA	NA
AABR07064000.1	3	1	3	2	1	3	5	4	7	ENSRNOG00000029594	120093247	6	56888458	56888928	+	protein_coding	NA	NA	NA	NA	NA	NA
AABR07064031.1	0	0	0	0	0	0	0	0	0	ENSRNOG00000058074	120093461	6	58396183	58396315	-	snoRNA	NA	NA	NA	NA	NA	NA
AABR07064048.1	0	1	0	0	0	0	0	0	0	ENSRNOG00000050810	NA	6	261361	262466	-	pseudogene	NA	NA	NA	NA	NA	NA
AABR07064122.1	0	0	0	0	0	0	0	0	0	ENSRNOG00000053020	120093462	6	62193610	62193737	+	snoRNA	NA	NA	NA	NA	NA	NA
AABR07064132.1	0	0	0	0	0	0	0	0	0	ENSRNOG00000059648	120093449	6	62859287	62859414	+	snoRNA	NA	NA	NA	NA	NA	NA
AABR07064213.1	0	0	0	0	0	0	0	0	0	ENSRNOG00000054985	120093468	6	65835125	65835255	+	snoRNA	NA	NA	NA	NA	NA	NA
AABR07064224.1	0	0	0	0	0	0	0	0	0	ENSRNOG00000031317	366614	6	66654294	66654692	+	protein_coding	GO:1902600|proton transmembrane transport;	NA	GO:0008289|lipid binding;GO:0015078|proton transmembrane transporter activity;	NA	NA	NA
AABR07064227.1	0	0	0	0	0	0	0	0	0	ENSRNOG00000058196	120093455	6	66845497	66845624	+	snoRNA	NA	NA	NA	NA	NA	NA
AABR07064228.1	0	0	0	0	0	0	0	0	0	ENSRNOG00000054621	120093458	6	66881369	66881496	-	snoRNA	NA	NA	NA	NA	NA	NA
AABR07064299.1	0	0	0	0	0	0	0	0	0	ENSRNOG00000056178	120093424	6	71090024	71090159	+	snoRNA	NA	NA	NA	NA	NA	NA
AABR07064305.1	18	10	18	16	22	18	14	12	14	ENSRNOG00000031285	500650	6	71845227	71846354	-	protein_coding	GO:0030150|protein import into mitochondrial matrix;	GO:0005744|TIM23 mitochondrial import inner membrane translocase complex;	GO:0008320|protein transmembrane transporter activity;	NA	NA	NA
AABR07064368.1	0	0	0	0	0	0	0	0	0	ENSRNOG00000056430	120093450	6	73719985	73720115	-	snoRNA	NA	NA	NA	NA	NA	NA
AABR07064373.1	0	0	0	0	0	0	0	0	0	ENSRNOG00000057283	120093467	6	74016215	74016333	+	snoRNA	NA	NA	NA	NA	NA	NA
AABR07064392.1	0	0	0	0	0	0	0	0	0	ENSRNOG00000046896	NA	6	75407850	75408724	-	protein_coding	NA	NA	NA	NA	NA	NA
AABR07064502.1	0	0	0	0	0	1	0	0	2	ENSRNOG00000051280	NA	6	79331286	79332998	+	protein_coding	NA	NA	NA	NA	NA	NA
AABR07064584.1	0	0	0	0	0	0	0	0	0	ENSRNOG00000056792	NA	6	82374209	82589978	-	lncRNA	NA	NA	NA	NA	NA	NA
AABR07064590.1	0	0	0	0	0	0	0	0	0	ENSRNOG00000050408	NA	6	265208	266329	+	protein_coding	NA	NA	NA	NA	NA	NA
AABR07064616.1	0	0	0	0	0	0	0	0	0	ENSRNOG00000052215	120093430	6	83406674	83406809	+	snoRNA	NA	NA	NA	NA	NA	NA
AABR07064618.1	0	0	0	0	0	0	0	0	0	ENSRNOG00000061206	120093448	6	83516704	83516832	-	snoRNA	NA	NA	NA	NA	NA	NA
AABR07064622.1	0	0	0	0	0	0	0	0	0	ENSRNOG00000047877	NA	6	45848219	45849292	-	protein_coding	NA	NA	NA	NA	NA	NA
AABR07064634.1	0	1	0	0	0	1	0	1	2	ENSRNOG00000038771	689408	6	84321903	84322289	+	protein_coding	NA	GO:0000786|nucleosome;GO:0005634|nucleus;	GO:0003677|DNA binding;GO:0030527|structural constituent of chromatin;GO:0046982|protein heterodimerization activity;	K11251|histone H2A;K11251|histone H2A;K11251|histone H2A;K11251|histone H2A;K11251|histone H2A;	rno03082;rno04217;rno04613;rno05034;rno05322;	ATP-dependent chromatin remodeling;Necroptosis;Neutrophil extracellular trap formation;Alcoholism;Systemic lupus erythematosus;
AABR07064645.1	0	0	0	0	0	0	0	0	0	ENSRNOG00000058064	120093460	6	84867516	84867654	-	snoRNA	NA	NA	NA	NA	NA	NA
AABR07064650.1	0	0	0	0	0	0	0	0	0	ENSRNOG00000053107	120093426	6	85288181	85288298	+	snoRNA	NA	NA	NA	NA	NA	NA
AABR07064667.1	0	0	0	0	0	0	0	0	0	ENSRNOG00000004163	689496	6	86212462	86212971	-	protein_coding	GO:0006412|translation;	NA	NA	NA	NA	NA
AABR07064702.1	0	0	1	0	0	0	0	0	0	ENSRNOG00000038735	NA	10	94174339	94174740	-	processed_pseudogene	NA	NA	NA	NA	NA	NA
AABR07064716.1	0	0	0	0	0	0	0	0	0	ENSRNOG00000028058	102547663	6	87762306	87762791	-	protein_coding	NA	NA	NA	NA	NA	NA
AABR07064719.2	696	624	705	703	620	649	753	605	576	ENSRNOG00000056128	100322884	6	87791656	87835841	-	protein_coding	GO:0051168|nuclear export;GO:0065003|protein-containing complex assembly;GO:1990116|ribosome-associated ubiquitin-dependent protein catabolic process;	GO:0005829|cytosol;GO:1990112|RQC complex;	GO:0005515|protein binding;	NA	NA	NA
AABR07064747.2	8	5	7	2	1	2	12	1	13	ENSRNOG00000058915	120093415	6	89414682	89414752	-	snoRNA	NA	NA	NA	NA	NA	NA
AABR07064753.1	0	0	0	0	0	0	0	0	0	ENSRNOG00000032924	NA	6	89822951	89842880	+	protein_coding	NA	NA	NA	NA	NA	NA
AABR07064804.1	415	387	373	394	377	330	642	616	612	ENSRNOG00000005568	690217	6	91125063	91170439	+	protein_coding	NA	GO:0016020|membrane;	NA	NA	NA	NA
AABR07064810.1	3	5	4	5	4	1	11	6	4	ENSRNOG00000033058	108351255	6	91644365	91644697	+	protein_coding	NA	NA	NA	NA	NA	NA
AABR07064811.2	0	0	0	0	0	0	0	0	0	ENSRNOG00000059371	120093470	6	91851274	91851333	-	snoRNA	NA	NA	NA	NA	NA	NA
AABR07064867.2	0	0	0	0	0	0	0	4	1	ENSRNOG00000051551	NA	6	94446646	94467354	+	lncRNA	NA	NA	NA	NA	NA	NA
AABR07064910.1	0	0	0	0	0	0	0	0	0	ENSRNOG00000059576	120093478	6	95874149	95874265	-	snoRNA	NA	NA	NA	NA	NA	NA
AABR07064922.1	0	0	0	0	0	0	0	0	0	ENSRNOG00000059409	120093469	6	96511415	96511548	-	snoRNA	NA	NA	NA	NA	NA	NA
AABR07064932.1	0	0	0	0	0	0	0	0	0	ENSRNOG00000056681	120093464	6	96879808	96879931	+	snoRNA	NA	NA	NA	NA	NA	NA
AABR07064980.1	5	2	3	3	0	2	5	2	2	ENSRNOG00000055777	100361079	6	98809534	98809897	-	protein_coding	GO:0002181|cytoplasmic translation;GO:0008150|biological_process;	GO:0005730|nucleolus;GO:0005783|endoplasmic reticulum;GO:0005829|cytosol;GO:0022625|cytosolic large ribosomal subunit;GO:0022626|cytosolic ribosome;GO:0042788|polysomal ribosome;GO:0045202|synapse;	GO:0003674|molecular_function;GO:0003735|structural constituent of ribosome;	K02920|large subunit ribosomal protein L36e;K02920|large subunit ribosomal protein L36e;	rno03010;rno05171;	Ribosome;Coronavirus disease - COVID-19;
AABR07064983.1	0	0	1	0	0	0	0	1	0	ENSRNOG00000004582	299169	6	99294126	99295052	+	protein_coding	NA	GO:0005669|transcription factor TFIID complex;	GO:0046982|protein heterodimerization activity;	NA	NA	NA
AABR07064983.2	0	1	0	0	0	0	3	3	0	ENSRNOG00000006599	366675	6	99270190	99270600	-	protein_coding	GO:0007165|signal transduction;	NA	NA	NA	NA	NA
AABR07064999.1	0	0	0	0	0	0	0	0	0	ENSRNOG00000038335	NA	6	99321084	99321566	+	protein_coding	NA	NA	NA	NA	NA	NA
AABR07065010.1	0	0	0	1	0	0	0	0	0	ENSRNOG00000042752	362758	6	100024246	100025811	-	protein_coding	GO:0000413|protein peptidyl-prolyl isomerization;GO:0006457|protein folding;GO:0016567|protein ubiquitination;	GO:0005634|nucleus;	GO:0003755|peptidyl-prolyl cis-trans isomerase activity;GO:0004842|ubiquitin-protein transferase activity;	NA	NA	NA
AABR07065031.1	17	9	8	6	7	11	11	9	18	ENSRNOG00000047682	103690152	6	101256172	101265662	-	protein_coding	GO:0006508|proteolysis;	GO:0016020|membrane;	GO:0004222|metalloendopeptidase activity;GO:0046872|metal ion binding;	NA	NA	NA
AABR07065083.1	0	0	0	0	0	0	0	0	0	ENSRNOG00000055274	120093445	6	102427215	102427337	-	snoRNA	NA	NA	NA	NA	NA	NA
AABR07065113.1	18	17	21	21	13	11	83	61	86	ENSRNOG00000050817	120103587	6	107186096	107187961	-	protein_coding	GO:0000398|mRNA splicing, via spliceosome;	NA	GO:0003676|nucleic acid binding;GO:0003724|RNA helicase activity;GO:0005524|ATP binding;GO:0016787|hydrolase activity;	NA	NA	NA
AABR07065139.1	0	0	0	0	0	0	0	0	0	ENSRNOG00000012652	500697	6	107202400	107204535	+	protein_coding	GO:0015031|protein transport;	NA	NA	K18723|nucleoporin GLE1;K18723|nucleoporin GLE1;K18723|nucleoporin GLE1;	rno03013;rno03015;rno05014;	Nucleocytoplasmic transport;mRNA surveillance pathway;Amyotrophic lateral sclerosis;
AABR07065139.2	0	0	0	0	0	0	0	0	0	ENSRNOG00000053311	299219	6	107124892	107127024	-	protein_coding	GO:0015031|protein transport;	NA	NA	NA	NA	NA
AABR07065190.2	0	0	0	0	0	0	0	0	0	ENSRNOG00000059161	120093441	6	109773449	109773570	+	snoRNA	NA	NA	NA	NA	NA	NA
AABR07065217.2	0	0	0	0	0	0	0	0	0	ENSRNOG00000042542	NA	6	110935598	110936083	-	protein_coding	NA	NA	NA	NA	NA	NA
AABR07065250.1	0	0	0	0	0	0	0	0	0	ENSRNOG00000058594	120093484	6	112175841	112175977	-	snoRNA	NA	NA	NA	NA	NA	NA
AABR07065259.1	0	0	0	0	0	0	0	0	0	ENSRNOG00000056818	120093471	6	112794531	112794642	+	snoRNA	NA	NA	NA	NA	NA	NA
AABR07065265.1	0	0	1	0	0	1	0	0	0	ENSRNOG00000021751	NA	6	113237519	113242425	-	protein_coding	NA	NA	NA	NA	NA	NA
AABR07065291.1	0	0	0	0	0	0	0	0	0	ENSRNOG00000049801	NA	17	65975335	65975775	-	pseudogene	NA	NA	NA	NA	NA	NA
AABR07065362.1	0	0	0	1	0	0	1	0	1	ENSRNOG00000059370	120093474	6	119394859	119394983	+	snoRNA	NA	NA	NA	NA	NA	NA
AABR07065406.1	37	28	25	27	29	22	36	24	35	ENSRNOG00000005718	100911956	6	121118450	121119528	+	pseudogene	NA	GO:0005694|chromosome;	NA	NA	NA	NA
AABR07065420.1	60	82	92	85	74	67	43	46	43	ENSRNOG00000055661	314407	6	123087873	123091059	+	protein_coding	GO:0006886|intracellular protein transport;	GO:0005737|cytoplasm;	GO:0031267|small GTPase binding;	NA	NA	NA
AABR07065423.1	0	0	0	0	0	0	2	2	1	ENSRNOG00000061830	120093457	6	123334321	123334451	-	snoRNA	NA	NA	NA	NA	NA	NA
AABR07065438.2	0	0	0	0	0	0	0	0	0	ENSRNOG00000059389	120093414	6	123986822	123987096	-	scaRNA	NA	NA	NA	NA	NA	NA
AABR07065466.1	0	0	0	0	0	0	0	0	0	ENSRNOG00000053121	120093472	6	125122345	125122428	+	snoRNA	NA	NA	NA	NA	NA	NA
AABR07065531.19	0	0	0	0	0	0	0	0	0	ENSRNOG00000057567	120093398	6	128628206	128628291	+	snoRNA	NA	NA	NA	NA	NA	NA
AABR07065531.24	7	2	7	7	3	5	1	0	0	ENSRNOG00000059106	120093405	6	128602941	128603014	+	snoRNA	NA	NA	NA	NA	NA	NA
AABR07065531.30	0	0	0	0	0	0	0	0	0	ENSRNOG00000060721	120093411	6	128600461	128600532	+	snoRNA	NA	NA	NA	NA	NA	NA
AABR07065531.6	0	1	2	1	0	1	0	0	0	ENSRNOG00000051976	120093410	6	128607734	128607815	+	snoRNA	NA	NA	NA	NA	NA	NA
AABR07065532.5	0	0	0	0	0	0	0	0	0	ENSRNOG00000053761	120093408	6	128698823	128698888	+	snoRNA	NA	NA	NA	NA	NA	NA
AABR07065532.9	0	0	0	0	0	0	0	0	0	ENSRNOG00000054892	120093375	6	128690850	128690924	+	snoRNA	NA	NA	NA	NA	NA	NA
AABR07065589.1	0	0	0	0	0	0	0	0	0	ENSRNOG00000053429	NA	6	130463532	130463843	-	protein_coding	NA	NA	NA	NA	NA	NA
AABR07065590.1	0	0	1	2	0	0	0	0	0	ENSRNOG00000061911	NA	6	130535819	130586311	-	lncRNA	NA	NA	NA	NA	NA	NA
AABR07065593.1	56	58	48	41	43	28	35	36	39	ENSRNOG00000055908	120093420	6	130591965	130592090	+	snoRNA	NA	NA	NA	NA	NA	NA
AABR07065776.1	0	0	0	0	0	0	0	0	0	ENSRNOG00000006321	299415	6	134287818	134288702	+	protein_coding	GO:0000027|ribosomal large subunit assembly;GO:0000470|maturation of LSU-rRNA;	GO:0005730|nucleolus;	GO:0019843|rRNA binding;	NA	NA	NA
AABR07065781.1	0	0	0	0	0	0	0	0	0	ENSRNOG00000030812	NA	6	134488094	134488587	-	protein_coding	NA	NA	NA	NA	NA	NA
AABR07065782.1	0	0	0	0	0	0	0	0	0	ENSRNOG00000033376	NA	6	134539974	134540303	-	IG_V_gene	NA	NA	NA	NA	NA	NA
AABR07065789.1	0	0	0	0	0	0	0	0	0	ENSRNOG00000006333	120103440	6	134872774	134873270	-	protein_coding	NA	NA	NA	NA	NA	NA
AABR07065790.1	0	0	0	0	0	0	0	0	0	ENSRNOG00000029121	100361324	6	134584503	134585002	-	protein_coding	NA	NA	NA	NA	NA	NA
AABR07065808.1	0	0	0	0	0	0	0	0	0	ENSRNOG00000060184	120103442	6	135178938	135179469	-	protein_coding	NA	NA	NA	NA	NA	NA
AABR07065812.2	0	0	0	0	0	0	0	0	0	ENSRNOG00000049870	NA	6	135387664	135388140	-	protein_coding	NA	NA	NA	NA	NA	NA
AABR07065813.1	0	0	0	0	0	0	0	0	0	ENSRNOG00000055169	NA	6	135538767	135568573	-	protein_coding	NA	NA	NA	NA	NA	NA
AABR07065814.2	0	0	0	0	0	0	0	0	0	ENSRNOG00000042319	NA	6	135592956	135593464	-	protein_coding	NA	NA	NA	NA	NA	NA
AABR07065823.1	0	0	0	0	0	0	0	0	0	ENSRNOG00000029776	100359978	6	136187348	136187728	-	protein_coding	NA	NA	NA	NA	NA	NA
AABR07065823.2	0	0	0	0	0	0	0	0	0	ENSRNOG00000030235	299458	6	136095796	136096294	-	protein_coding	NA	NA	NA	NA	NA	NA
AABR07065970.1	0	0	0	0	0	0	0	0	0	ENSRNOG00000000124	103690615	9	6382212	6382523	+	protein_coding	NA	GO:0016020|membrane;	NA	NA	NA	NA
AABR07066109.1	0	1	1	3	4	2	0	0	0	ENSRNOG00000057108	120094889	9	4281481	4281609	-	snoRNA	NA	NA	NA	NA	NA	NA
AABR07066379.1	0	0	0	1	0	0	3	3	0	ENSRNOG00000048686	685668	9	10664752	10683939	+	protein_coding	NA	NA	NA	NA	NA	NA
AABR07066416.2	0	0	0	0	0	0	0	0	0	ENSRNOG00000046104	NA	9	3085489	3086931	+	protein_coding	NA	NA	NA	NA	NA	NA
AABR07066440.1	0	0	0	0	0	0	0	0	0	ENSRNOG00000045945	NA	9	38256692	38257036	+	protein_coding	NA	NA	NA	NA	NA	NA
AABR07066529.1	1092	940	972	995	854	815	2775	2314	2204	ENSRNOG00000048462	363328	9	1102366	1123147	-	protein_coding	GO:0002281|macrophage activation involved in immune response;GO:0002735|positive regulation of myeloid dendritic cell cytokine production;GO:0002756|MyD88-independent toll-like receptor signaling pathway;GO:0006809|nitric oxide biosynthetic process;GO:0006915|apoptotic process;GO:0006954|inflammatory response;GO:0007249|I-kappaB kinase/NF-kappaB signaling;GO:0010508|positive regulation of autopha…	GO:0005739|mitochondrion;GO:0005776|autophagosome;GO:0005811|lipid droplet;GO:0005829|cytosol;GO:0031410|cytoplasmic vesicle;GO:0097342|ripoptosome;	GO:0019901|protein kinase binding;	K05842|toll-like receptor adapter molecule 1;K05842|toll-like receptor adapter molecule 1;K05842|toll-like receptor adapter molecule 1;K05842|toll-like receptor adapter molecule 1;K05842|toll-like receptor adapter molecule 1;K05842|toll-like receptor adapter molecule 1;K05842|toll-like receptor adapter molecule 1;K05842|toll-like receptor adapter molecule 1;K05842|toll-like receptor adapter molec…	rno04064;rno04217;rno04620;rno04621;rno04936;rno05133;rno05135;rno05142;rno05160;rno05161;rno05164;rno05165;rno05167;rno05168;rno05235;rno05417;	NF-kappa B signaling pathway;Necroptosis;Toll-like receptor signaling pathway;NOD-like receptor signaling pathway;Alcoholic liver disease;Pertussis;Yersinia infection;Chagas disease;Hepatitis C;Hepatitis B;Influenza A;Human papillomavirus infection;Kaposi sarcoma-associated herpesvirus infection;Herpes simplex virus 1 infection;PD-L1 expression and PD-1 checkpoint pathway in cancer;Lipid and athe…
AABR07066534.2	0	0	0	0	0	0	0	0	0	ENSRNOG00000051992	120094900	9	756175	756311	+	snoRNA	NA	NA	NA	NA	NA	NA
AABR07066700.1	7	3	0	1	1	0	19	16	19	ENSRNOG00000047581	100360856	9	2849456	2916360	-	protein_coding	NA	NA	NA	NA	NA	NA
AABR07066753.1	0	0	0	0	0	0	0	0	0	ENSRNOG00000032086	NA	9	12817846	12827133	+	protein_coding	NA	NA	NA	NA	NA	NA
AABR07066762.1	1	2	0	5	0	1	0	4	5	ENSRNOG00000015386	100912849	9	13560876	13582814	+	protein_coding	GO:0007601|visual perception;GO:0007602|phototransduction;GO:0031282|regulation of guanylate cyclase activity;	GO:0001750|photoreceptor outer segment;GO:0001917|photoreceptor inner segment;GO:0120199|cone photoreceptor outer segment;	GO:0008048|calcium sensitive guanylate cyclase activator activity;GO:0030249|guanylate cyclase regulator activity;	NA	NA	NA
AABR07066800.1	50	38	33	36	37	34	29	26	5	ENSRNOG00000061680	120093043	9	14203474	14203604	+	snoRNA	NA	NA	NA	NA	NA	NA
AABR07066816.1	1	1	1	2	2	4	0	1	0	ENSRNOG00000056839	120094892	9	14580285	14580409	+	snoRNA	NA	NA	NA	NA	NA	NA
AABR07066818.1	1423	1346	1564	1278	1401	1278	1387	1607	2156	ENSRNOG00000022934	363196	9	14826695	14827663	-	protein_coding	NA	NA	GO:0003723|RNA binding;	NA	NA	NA
AABR07066826.2	0	0	0	0	0	0	0	0	0	ENSRNOG00000049311	NA	9	15616470	15616832	+	protein_coding	NA	NA	NA	NA	NA	NA
AABR07066946.1	2	0	1	0	0	0	0	0	0	ENSRNOG00000039663	102553880	9	20170583	20172989	-	protein_coding	GO:0007165|signal transduction;	GO:0005615|extracellular space;	GO:0005186|pheromone activity;	NA	NA	NA
AABR07066946.2	4	1	0	1	2	3	1	1	4	ENSRNOG00000048329	108351992	9	20033780	20058837	-	protein_coding	NA	GO:0005789|endoplasmic reticulum membrane;	GO:0005506|iron ion binding;	NA	NA	NA
AABR07066987.1	0	0	0	0	0	0	0	0	0	ENSRNOG00000061208	120094920	9	21520445	21520572	-	snoRNA	NA	NA	NA	NA	NA	NA
AABR07066994.1	0	0	0	0	0	0	0	0	0	ENSRNOG00000042034	NA	9	21576846	21577238	+	processed_pseudogene	NA	NA	NA	NA	NA	NA
AABR07067031.1	0	0	0	0	0	0	0	0	0	ENSRNOG00000060877	120094940	9	23262152	23262285	-	snoRNA	NA	NA	NA	NA	NA	NA
AABR07067032.1	0	0	0	0	0	0	0	0	0	ENSRNOG00000057549	120094937	9	23338722	23338803	-	snoRNA	NA	NA	NA	NA	NA	NA
AABR07067042.3	0	0	0	0	0	0	0	0	0	ENSRNOG00000052878	NA	9	23821969	23824079	+	protein_coding	NA	NA	NA	NA	NA	NA
AABR07067076.1	0	0	0	0	0	0	0	0	0	ENSRNOG00000058900	120094650	9	25551719	25649039	+	lncRNA	NA	NA	NA	NA	NA	NA
AABR07067080.2	0	0	0	0	0	0	0	0	0	ENSRNOG00000058076	120094935	9	25698424	25698531	+	snoRNA	NA	NA	NA	NA	NA	NA
AABR07067138.1	0	0	0	0	0	0	0	0	0	ENSRNOG00000061136	120094898	9	28562778	28562911	+	snRNA	NA	NA	NA	NA	NA	NA
AABR07067148.1	0	0	0	0	0	0	0	0	0	ENSRNOG00000051422	120094941	9	28871190	28871294	+	snoRNA	NA	NA	NA	NA	NA	NA
AABR07067233.1	0	0	0	0	0	0	0	0	0	ENSRNOG00000053280	120094934	9	30858678	30858801	+	snoRNA	NA	NA	NA	NA	NA	NA
AABR07067267.1	0	0	0	0	0	0	0	0	0	ENSRNOG00000011124	NA	9	33047185	33049906	+	pseudogene	NA	NA	NA	NA	NA	NA
AABR07067339.1	0	0	0	0	0	0	0	0	0	ENSRNOG00000022456	NA	8	96977420	96977861	-	protein_coding	NA	NA	NA	NA	NA	NA
AABR07067344.1	0	0	0	0	0	0	0	0	0	ENSRNOG00000057405	120094931	9	33539517	33539639	-	snoRNA	NA	NA	NA	NA	NA	NA
AABR07067351.1	0	0	0	0	0	0	0	0	0	ENSRNOG00000053594	120094893	9	36746346	36746464	-	snoRNA	NA	NA	NA	NA	NA	NA
AABR07067370.2	0	0	0	0	0	0	0	0	0	ENSRNOG00000057873	120094913	9	37335150	37335272	+	snoRNA	NA	NA	NA	NA	NA	NA
AABR07067388.1	0	0	0	0	0	0	0	0	0	ENSRNOG00000045975	NA	9	37981049	37981534	+	protein_coding	NA	NA	NA	NA	NA	NA
AABR07067441.3	0	0	0	0	0	0	0	0	0	ENSRNOG00000052328	NA	9	41302749	41302955	-	protein_coding	NA	NA	NA	NA	NA	NA
AABR07067452.1	0	0	0	0	0	0	0	0	0	ENSRNOG00000053750	120094921	9	41921338	41921468	+	snoRNA	NA	NA	NA	NA	NA	NA
AABR07067459.1	3	2	1	1	1	1	0	0	0	ENSRNOG00000061227	NA	9	42605497	42608058	-	protein_coding	NA	NA	NA	NA	NA	NA
AABR07067504.1	0	0	0	0	0	0	0	0	0	ENSRNOG00000051910	120094930	9	45127812	45127930	-	snoRNA	NA	NA	NA	NA	NA	NA
AABR07067526.1	1	0	5	0	0	0	0	1	0	ENSRNOG00000060633	501134	9	46506547	46507056	+	processed_pseudogene	NA	NA	NA	NA	NA	NA
AABR07067583.1	0	2	2	5	0	2	3	2	5	ENSRNOG00000055728	685108	9	48076925	48077377	+	protein_coding	NA	GO:0016020|membrane;	NA	NA	NA	NA
AABR07067594.1	0	0	0	0	0	0	0	0	0	ENSRNOG00000061150	120094923	9	48391955	48392087	+	snoRNA	NA	NA	NA	NA	NA	NA
AABR07067600.1	16	16	25	15	18	24	455	431	387	ENSRNOG00000028330	NA	9	48763742	48764305	-	protein_coding	NA	NA	NA	NA	NA	NA
AABR07067657.1	0	0	0	0	0	0	0	0	0	ENSRNOG00000061512	120094929	9	52090288	52090429	+	snoRNA	NA	NA	NA	NA	NA	NA
AABR07067749.1	1	0	0	0	0	0	0	1	0	ENSRNOG00000032947	108351931	9	55833950	55834327	-	protein_coding	NA	NA	NA	NA	NA	NA
AABR07067762.1	7	9	11	2	12	1	10	8	33	ENSRNOG00000055383	NA	9	56634648	56635789	+	protein_coding	NA	NA	NA	NA	NA	NA
AABR07067810.1	0	0	0	0	0	0	0	0	0	ENSRNOG00000052875	120094932	9	59701502	59701601	-	snoRNA	NA	NA	NA	NA	NA	NA
AABR07067813.1	1	0	0	1	0	1	0	0	3	ENSRNOG00000032860	120094797	9	60584841	60585260	+	protein_coding	NA	NA	NA	NA	NA	NA
AABR07067814.1	0	0	0	1	0	1	0	0	0	ENSRNOG00000032289	NA	9	60699846	60700505	+	protein_coding	NA	NA	NA	NA	NA	NA
AABR07067827.4	0	0	0	0	0	0	0	0	0	ENSRNOG00000058881	120094899	9	61124277	61124421	+	snoRNA	NA	NA	NA	NA	NA	NA
AABR07067851.1	0	0	0	0	0	0	0	0	0	ENSRNOG00000055876	120094895	9	62093950	62094058	-	snoRNA	NA	NA	NA	NA	NA	NA
AABR07067979.1	0	0	0	0	0	0	0	0	0	ENSRNOG00000059737	120094945	9	69865987	69866117	-	snRNA	NA	NA	NA	NA	NA	NA
AABR07068007.3	0	0	0	0	0	0	0	0	0	ENSRNOG00000059892	120094917	9	71345735	71345862	-	snoRNA	NA	NA	NA	NA	NA	NA
AABR07068018.1	0	0	0	0	0	0	0	0	0	ENSRNOG00000053138	120094902	9	72154158	72154301	-	snoRNA	NA	NA	NA	NA	NA	NA
AABR07068042.1	1	0	2	1	2	0	3	0	0	ENSRNOG00000037894	NA	9	73264478	73268630	+	protein_coding	NA	NA	NA	NA	NA	NA
AABR07068071.1	0	0	0	0	0	0	0	0	0	ENSRNOG00000057288	120094901	9	75310800	75310942	-	snoRNA	NA	NA	NA	NA	NA	NA
AABR07068084.1	2	1	0	0	2	1	0	2	3	ENSRNOG00000032518	100361833	9	76549421	76549840	+	protein_coding	GO:0015986|proton motive force-driven ATP synthesis;GO:1902600|proton transmembrane transport;	GO:0031966|mitochondrial membrane;GO:0045263|proton-transporting ATP synthase complex, coupling factor F(o);	GO:0008289|lipid binding;GO:0015078|proton transmembrane transporter activity;	NA	NA	NA
AABR07068085.1	0	0	0	0	0	0	0	0	0	ENSRNOG00000051900	120094891	9	78578501	78578638	+	snoRNA	NA	NA	NA	NA	NA	NA
AABR07068138.1	0	0	0	0	0	0	0	0	0	ENSRNOG00000053947	120094936	9	80870561	80870674	-	snoRNA	NA	NA	NA	NA	NA	NA
AABR07068154.1	5	6	3	3	4	6	3	1	1	ENSRNOG00000027719	NA	9	81784742	81786124	-	protein_coding	NA	NA	NA	NA	NA	NA
AABR07068248.1	0	0	0	0	0	0	0	0	0	ENSRNOG00000055670	NA	9	86231284	86231989	-	pseudogene	NA	NA	NA	NA	NA	NA
AABR07068253.1	0	0	0	0	0	0	0	0	0	ENSRNOG00000022614	NA	9	86647223	86647627	+	protein_coding	NA	NA	NA	NA	NA	NA
AABR07068274.1	0	0	0	0	0	0	0	0	0	ENSRNOG00000053030	NA	9	88176074	88176476	-	protein_coding	NA	NA	NA	NA	NA	NA
AABR07068327.1	0	0	0	0	0	0	0	0	0	ENSRNOG00000030045	301609	9	92815628	92815936	-	protein_coding	NA	NA	NA	NA	NA	NA
AABR07068327.3	0	0	1	0	0	0	1	0	0	ENSRNOG00000052997	120094890	9	92601220	92601359	+	snoRNA	NA	NA	NA	NA	NA	NA
AABR07068386.1	0	0	0	0	0	0	0	0	0	ENSRNOG00000051658	120094939	9	95421520	95421616	-	snoRNA	NA	NA	NA	NA	NA	NA
AABR07068416.1	0	0	0	0	0	0	0	0	0	ENSRNOG00000053713	120094925	9	97128045	97128175	+	snoRNA	NA	NA	NA	NA	NA	NA
AABR07068417.1	0	0	0	0	0	0	0	0	0	ENSRNOG00000025797	NA	9	97357491	97358438	-	protein_coding	NA	NA	NA	NA	NA	NA
AABR07068536.1	10	9	7	6	10	5	11	7	19	ENSRNOG00000032765	367324	9	99093460	99093867	+	protein_coding	GO:0006412|translation;	GO:0005840|ribosome;GO:1990904|ribonucleoprotein complex;	GO:0003735|structural constituent of ribosome;	NA	NA	NA
AABR07068554.1	0	0	0	0	0	0	0	0	0	ENSRNOG00000060095	NA	9	100550032	100824256	+	lncRNA	NA	NA	NA	NA	NA	NA
[truncated: 28,453 more rows]
