# Supplementary material for: Dental Follicle Mesenchymal Stem Cell-Derived Exosomes Mitigate Temporomandibular Joint Osteoarthritis in an In Vitro Model via the miR-146a-5p/Traf6/NF-κB Axis
Source: Research Square preprint supplement (doi:10.21203/rs.3.rs-8341412/v1), 2025-12-19
Supplement: Supplementary file 2 [file 14448629ae1faa5474bf23c8.docx]

Supplementary Table 7 Detailed Information about the Generated Data in miRNA Sequencing

| **Sample Name** | **Raw Bases (bp)** | **Clean Base (bp)** | **Raw Reads** | **Clean Reads** | **Q20 Ratio (%)** | **GC Content (%)** |
| --- | --- | --- | --- | --- | --- | --- |
| Model-1 | 1083111200 | 647689472 | 21662224 | 20834561 | 99.32 | 47.39 |
| Model-2 | 877153850 | 513416062 | 17543077 | 16858614 | 99.43 | 47.49 |
| Model-3 | 91626950 | 560647530 | 18324139 | 17703469 | 99.37 | 47.37 |
| Treatment-1 | 1098611650 | 629909406 | 21972233 | 21163577 | 99.36 | 50.04 |
| Treatment-2 | 814516400 | 464690952 | 16290328 | 15684606 | 98.59 | 49.77 |
| Treatment-3 | 937601350 | 553762718 | 18752027 | 18185942 | 99.39 | 48.60 |

Note: Q20 indicates the percentage of bases with a Phred quality score > 20, signifying the reliability of base identification in the sequencing data.
