# Supplementary material for: Dental Follicle Mesenchymal Stem Cell-Derived Exosomes Mitigate Temporomandibular Joint Osteoarthritis in an In Vitro Model via the miR-146a-5p/Traf6/NF-κB Axis
Source: Research Square preprint supplement (doi:10.21203/rs.3.rs-8341412/v1), 2025-12-19
Supplement: Supplementary file 3 [file 1456b83930c791e1bed9eb68.xlsx]

## Sheet: Sheet 1
ID	Gene_name	baseMean	log2FoldChange	lfcSE	stat	pvalue	padj	Significant	Regulation	log_padj	1/lfcSE	Symbol	Treatment_1	Treatment_2	Treatment_3	Model_1	Model_2	Model_3
rno-miR-146a-5p	rno-miR-146a-5p	1846.12	7.42624	0.196804	37.7341	1e-300	1e-300	Significant	Upregulated	300	5.08119	rno-miR-146a-5p	3528	2789	3650	28	26	19
rno-miR-210-3p	rno-miR-210-3p	831.928	1.86483	0.141518	13.1774	1.18437e-39	3.28071e-37	Significant	Upregulated	38.9265	7.06625	rno-miR-210-3p	1250	1157	1084	411	432	380
rno-miR-3574	rno-miR-3574	808.121	1.89689	0.14522	13.0622	5.41249e-39	9.99507e-37	Significant	Upregulated	38.2666	6.88611	rno-miR-3574	1235	1127	1045	406	420	343
rno-miR-365-5p	rno-miR-365-5p	789.603	-1.73525	0.135483	-12.8079	1.48173e-37	2.0522e-35	Significant	Downregulated	36.8292	7.38099	rno-miR-365-5p	368	312	300	1527	1332	1294
rno-miR-877	rno-miR-877	310.772	-1.39409	0.156822	-8.88968	6.12829e-19	6.79014e-17	Significant	Downregulated	18.2127	6.37668	rno-miR-877	150	139	175	585	520	438
rno-miR-320-5p	rno-miR-320-5p	227.423	5.70437	0.824175	6.92131	4.47485e-12	2.75452e-10	Significant	Upregulated	11.3492	1.21333	rno-miR-320-5p	696	319	183	10	3	16
rno-miR-92a-1-5p	rno-miR-92a-1-5p	41.9007	-2.6778	0.406323	-6.59033	4.38837e-11	2.16924e-09	Significant	Downregulated	10.3577	2.4611	rno-miR-92a-1-5p	10	7	14	82	70	95
rno-miR-1188-5p	rno-miR-1188-5p	134.364	-1.4132	0.226121	-6.24975	4.11119e-10	1.62686e-08	Significant	Downregulated	9.38603	4.4224	rno-miR-1188-5p	49	66	83	240	207	220
rno-miR-708-5p	rno-miR-708-5p	61.6304	1.89532	0.307309	6.16748	6.93886e-10	2.40258e-08	Significant	Upregulated	9.15871	3.25405	rno-miR-708-5p	81	69	116	25	33	31
rno-miR-210-5p	rno-miR-210-5p	38.2496	2.33507	0.407447	5.73097	9.98584e-09	3.06161e-07	Significant	Upregulated	8.00062	2.45431	rno-miR-210-5p	54	67	47	15	14	14
rno-miR-702-5p	rno-miR-702-5p	78.3044	-2.04228	0.358997	-5.68883	1.27911e-08	3.4195e-07	Significant	Downregulated	7.89309	2.78554	rno-miR-702-5p	43	29	9	154	143	133
novel_435	novel_435	45.4501	-2.19497	0.407736	-5.38331	7.31289e-08	1.55821e-06	Significant	Downregulated	7.13591	2.45257	novel_435	26	11	7	78	94	82
rno-miR-1247-3p	rno-miR-1247-3p	62.084	-1.73801	0.331359	-5.24509	1.56207e-07	3.09067e-06	Significant	Downregulated	6.8063	3.01788	rno-miR-1247-3p	19	18	42	122	86	119
rno-miR-128-1-5p	rno-miR-128-1-5p	29.9376	-2.41269	0.460941	-5.23427	1.65634e-07	3.16418e-06	Significant	Downregulated	6.78085	2.16948	rno-miR-128-1-5p	10	5	11	50	69	53
rno-miR-322-5p	rno-miR-322-5p	44.7039	1.67496	0.347788	4.81604	1.46434e-06	2.53513e-05	Significant	Upregulated	5.83436	2.87531	rno-miR-322-5p	60	56	68	31	17	25
rno-miR-503-5p	rno-miR-503-5p	124.014	1.06902	0.228025	4.68819	2.75638e-06	4.49127e-05	Significant	Upregulated	5.55966	4.38549	rno-miR-503-5p	180	129	145	76	100	96
novel_5	novel_5	19.6484	-2.63494	0.5764	-4.57138	4.84532e-06	7.45641e-05	Significant	Downregulated	5.31468	1.73491	novel_5	8	2	5	41	38	37
rno-miR-34a-5p	rno-miR-34a-5p	153.371	1.00495	0.223201	4.50246	6.71721e-06	8.86031e-05	Significant	Upregulated	5.17281	4.48027	rno-miR-34a-5p	181	165	208	102	156	90
rno-miR-3584-3p	rno-miR-3584-3p	9.6478	5.91356	1.33697	4.42309	9.7299e-06	0.000114689	Significant	Upregulated	5.01189	0.747958	rno-miR-3584-3p	20	16	15	1	0	0
rno-miR-146a-3p	rno-miR-146a-3p	5.80967	6.17929	1.45586	4.24444	2.19143e-05	0.000220737	Significant	Upregulated	4.65927	0.686881	rno-miR-146a-3p	13	4	16	0	0	0
rno-let-7c-1-3p	rno-let-7c-1-3p	31.5837	-1.81966	0.431395	-4.21808	2.46393e-05	0.000239477	Significant	Downregulated	4.60837	2.31806	rno-let-7c-1-3p	10	16	11	61	63	44
rno-miR-708-3p	rno-miR-708-3p	30.3112	1.72456	0.428538	4.02429	5.71482e-05	0.000510646	Significant	Upregulated	4.243	2.33352	rno-miR-708-3p	51	25	53	12	18	18
rno-miR-487b-5p	rno-miR-487b-5p	15.7606	-2.59228	0.660033	-3.92751	8.58296e-05	0.000742962	Significant	Downregulated	4.06636	1.51508	rno-miR-487b-5p	2	5	5	23	26	42
rno-miR-130b-5p	rno-miR-130b-5p	31.5541	-1.55185	0.414406	-3.74476	0.000180567	0.00133379	Significant	Downregulated	3.74336	2.41309	rno-miR-130b-5p	15	10	19	45	55	60
rno-miR-667-5p	rno-miR-667-5p	30.6331	-1.56958	0.421176	-3.72667	0.000194025	0.00141434	Significant	Downregulated	3.71214	2.3743	rno-miR-667-5p	12	17	12	55	53	48
rno-miR-615	rno-miR-615	30.6852	1.73241	0.493805	3.50829	0.000450996	0.00304697	Significant	Upregulated	3.34583	2.02509	rno-miR-615	54	40	32	16	5	27
rno-miR-497-5p	rno-miR-497-5p	44.0314	1.14099	0.350422	3.25604	0.00112978	0.00651974	Significant	Upregulated	2.94701	2.8537	rno-miR-497-5p	73	41	51	31	38	25
rno-miR-24-1-5p	rno-miR-24-1-5p	26.6322	1.25743	0.431022	2.91731	0.0035306	0.0186281	Significant	Upregulated	2.45215	2.32007	rno-miR-24-1-5p	40	21	43	21	16	17
rno-miR-136-5p	rno-miR-136-5p	10.1168	2.10845	0.733276	2.87539	0.00403534	0.0206998	Significant	Upregulated	2.39412	1.36374	rno-miR-136-5p	12	12	21	3	7	3
novel_240	novel_240	4.81278	-3.64868	1.37602	-2.65162	0.00801065	0.0385904	Significant	Downregulated	2.09633	0.726734	novel_240	0	0	2	13	13	5
novel_11	novel_11	24.8501	-1.1881	0.456524	-2.60249	0.00925507	0.0438231	Significant	Downregulated	2.03362	2.19047	novel_11	13	8	21	38	36	44
novel_12	novel_12	20.5604	-1.38381	0.536992	-2.57696	0.00996737	0.0456357	Significant	Downregulated	2.00142	1.86223	novel_12	7	14	9	42	41	19
rno-miR-328a-5p	rno-miR-328a-5p	11.9103	-1.80483	0.707571	-2.55075	0.0107492	0.0484151	Significant	Downregulated	1.96862	1.41329	rno-miR-328a-5p	5	1	9	28	13	23
rno-miR-200b-3p	rno-miR-200b-3p	3.78303	3.5604	1.42965	2.4904	0.01276	0.0556617	Significant	Upregulated	1.89415	0.699472	rno-miR-200b-3p	11	4	4	0	1	1
novel_264	novel_264	13.4397	-1.53295	0.616402	-2.48693	0.0128852	0.0557687	Significant	Downregulated	1.88991	1.62232	novel_264	7	4	8	31	19	19
rno-miR-3547	rno-miR-3547	1.98536	4.62291	1.8802	2.45873	0.013943	0.0598793	Significant	Upregulated	1.85564	0.531857	rno-miR-3547	1	3	7	0	0	0
rno-miR-195-5p	rno-miR-195-5p	8.76495	1.8449	0.7759	2.37776	0.0174181	0.0731033	Significant	Upregulated	1.759	1.28883	rno-miR-195-5p	8	9	21	3	5	5
rno-miR-149-3p	rno-miR-149-3p	21.419	1.28186	0.543464	2.35869	0.0183397	0.0763924	Significant	Upregulated	1.73661	1.84005	rno-miR-149-3p	21	39	18	13	9	20
rno-miR-20a-3p	rno-miR-20a-3p	1.73547	4.4123	1.91749	2.30108	0.0213868	0.0871199	Significant	Upregulated	1.66985	0.521516	rno-miR-20a-3p	3	4	2	0	0	0
rno-miR-483-3p	rno-miR-483-3p	23.0128	-1.04906	0.465048	-2.2558	0.024083	0.0957421	Significant	Downregulated	1.61829	2.15032	rno-miR-483-3p	16	10	15	45	37	25
rno-miR-675-3p	rno-miR-675-3p	6.90937	1.90512	0.856813	2.22349	0.0261825	0.101434	Significant	Upregulated	1.58199	1.16712	rno-miR-675-3p	8	11	10	5	3	2
novel_16	novel_16	10.0567	-1.60709	0.755846	-2.12622	0.0334851	0.123432	Significant	Downregulated	1.47515	1.32302	novel_16	2	7	4	23	20	9
novel_22	novel_22	4.70075	-2.52686	1.20639	-2.09456	0.0362097	0.130445	Significant	Downregulated	1.44117	0.82892	novel_22	0	0	4	14	7	7
rno-miR-347	rno-miR-347	2.1755	3.66727	1.82783	2.00635	0.0448185	0.153219	Significant	Upregulated	1.34854	0.547097	rno-miR-347	1	7	2	1	0	0
rno-miR-204-3p	rno-miR-204-3p	2.0622	3.62112	1.8056	2.00549	0.0449108	0.153219	Significant	Upregulated	1.34765	0.553832	rno-miR-204-3p	4	1	6	0	1	0
