# Supplementary material for: Dental Follicle Mesenchymal Stem Cell-Derived Exosomes Mitigate Temporomandibular Joint Osteoarthritis in an In Vitro Model via the miR-146a-5p/Traf6/NF-κB Axis
Source: Research Square preprint supplement (doi:10.21203/rs.3.rs-8341412/v1), 2025-12-19
Supplement: Supplementary file 4 [file 3fc701361c26c9303c4932f9.xlsx]

## Sheet: GO Model vs Control
ONTOLOGY	ID	Description	GeneRatio	BgRatio	RichFactor	FoldEnrichment	zScore	pvalue	p.adjust	qvalue	geneID	Count	GeneRatioDecimal
BP	GO:0071216	cellular response to biotic stimulus	39/470	376/18913	0.103723	4.17387	9.92352	4.48455e-14	1.35214e-10	9.48562e-11	Ankrd1/Ass1/Ccl2/Ccl20/Ccl5/Cd40/Cda/Csf2/Csf3/Cx3cl1/Cxcl1/Cxcl10/Cxcl16/Cxcl2/Cxcl3/Cxcl6/Il12b/Il1a/Il1b/Il6/Irf8/Lcn2/Mir146a/Mir23b/Mmp9/Nfkbia/Nfkbiz/Nod2/Nos2/Ppargc1a/Ptgs2/Syk/Ticam2/Tlr2/Tnf/Tnfaip3/Tnip3/Tspo/Zc3h12a	39	0.0829787
BP	GO:0071219	cellular response to molecule of bacterial origin	37/470	346/18913	0.106936	4.30317	9.89919	8.01027e-14	1.35214e-10	9.48562e-11	Ankrd1/Ass1/Ccl2/Ccl20/Ccl5/Cd40/Csf2/Csf3/Cx3cl1/Cxcl1/Cxcl10/Cxcl16/Cxcl2/Cxcl3/Cxcl6/Il12b/Il1a/Il1b/Il6/Irf8/Lcn2/Mir146a/Mir23b/Mmp9/Nfkbia/Nfkbiz/Nod2/Nos2/Ppargc1a/Ptgs2/Ticam2/Tlr2/Tnf/Tnfaip3/Tnip3/Tspo/Zc3h12a	37	0.0787234
BP	GO:0071222	cellular response to lipopolysaccharide	36/470	329/18913	0.109422	4.40321	9.94074	8.74604e-14	1.35214e-10	9.48562e-11	Ankrd1/Ass1/Ccl2/Ccl20/Ccl5/Cd40/Csf2/Csf3/Cx3cl1/Cxcl1/Cxcl10/Cxcl16/Cxcl2/Cxcl3/Cxcl6/Il12b/Il1a/Il1b/Il6/Irf8/Lcn2/Mir146a/Mir23b/Mmp9/Nfkbia/Nfkbiz/Nod2/Nos2/Ppargc1a/Ptgs2/Ticam2/Tnf/Tnfaip3/Tnip3/Tspo/Zc3h12a	36	0.0765957
BP	GO:0019221	cytokine-mediated signaling pathway	42/470	491/18913	0.0855397	3.44215	8.75281	3.10625e-12	3.6017e-09	2.52669e-09	Ccdc3/Ccl2/Ccl20/Ccl3/Ccl4/Ccl5/Ccl7/Cd40/Cntfr/Crlf1/Csf2/Csf3/Cx3cl1/Cxcl1/Cxcl10/Cxcl2/Cxcl3/Cxcl6/Cxcr4/Epor/Fosl1/Il12b/Il17f/Il1a/Il1b/Il1rn/Il34/Il6/Mir101a/Mir146a/Mir27b/Mmp12/Nfkbia/Nfkbiz/Oasl/Otop1/Plvap/Slc1a1/Syk/Ticam2/Tnf/Usp18	42	0.0893617
BP	GO:0034612	response to tumor necrosis factor	31/470	288/18913	0.107639	4.33143	9.09455	7.49132e-12	6.36218e-09	4.46324e-09	Adgre1/Ankrd1/Ass1/Birc3/Ccdc3/Ccl2/Ccl3/Ccl5/Cd40/Chi3l1/Cldn1/Cx3cl1/Cxcl16/Fabp4/Gch1/Il6/Lcn2/Mir221/Mir222/Mir27b/Mmp3/Mmp9/Nfkbia/Nos2/Plvap/Ppargc1a/Ptgs2/Syk/Thbs1/Tnf/Zc3h12a	31	0.0659574
BP	GO:0050900	leukocyte migration	37/470	403/18913	0.0918114	3.69453	8.72839	8.2305e-12	6.36218e-09	4.46324e-09	Bdkrb1/Ccl2/Ccl20/Ccl3/Ccl4/Ccl5/Ccl7/Cd69/Coro1a/Cx3cl1/Cxcl1/Cxcl10/Cxcl14/Cxcl16/Cxcl2/Cxcl3/Cxcl6/Cyp19a1/Fcgr2a/Il1a/Il1b/Il34/Kcnn4/Mir146a/Mmp9/Nfkbia/Nod2/Pla2g7/Plvap/Podxl/Syk/Thbs1/Tlr2/Tnf/Tnfrsf14/Vav3/Vegfa	37	0.0787234
BP	GO:0043523	regulation of neuron apoptotic process	33/470	341/18913	0.0967742	3.89423	8.60961	2.84009e-11	1.88176e-08	1.32011e-08	Adora2a/Ccl2/Ccl3/Cntfr/Coro1a/Crlf1/Cx3cl1/Egln1/Egln3/Epor/Gbe1/Gch1/Gdf5/Gpi/Grin1/Grk1/Hmox1/Il1b/Il6/Kcnma1/Lcn2/Mdga2/Mir222/Mt1/Ngfr/Ntrk1/Ppargc1a/Ppp2r2b/Ptprz1/Slc1a1/Sncb/Tnf/Vegfa	33	0.0702128
BP	GO:0071621	granulocyte chemotaxis	19/470	125/18913	0.152	6.11654	9.16207	2.69387e-10	1.56177e-07	1.09562e-07	Ccl2/Ccl3/Ccl4/Ccl5/Ccl7/Cx3cl1/Cxcl1/Cxcl10/Cxcl2/Cxcl3/Cxcl6/Fcgr2a/Il1b/Il34/Nod2/Syk/Thbs1/Vav3/Vegfa	19	0.0404255
BP	GO:0097530	granulocyte migration	21/470	156/18913	0.134615	5.41698	8.84317	3.16212e-10	1.62954e-07	1.14317e-07	Ccl2/Ccl3/Ccl4/Ccl5/Ccl7/Cx3cl1/Cxcl1/Cxcl10/Cxcl2/Cxcl3/Cxcl6/Fcgr2a/Il1a/Il1b/Il34/Nod2/Syk/Thbs1/Tlr2/Vav3/Vegfa	21	0.0446809
BP	GO:0043524	negative regulation of neuron apoptotic process	25/470	225/18913	0.111111	4.47116	8.36154	4.24669e-10	1.79546e-07	1.25956e-07	Adora2a/Ccl2/Cntfr/Coro1a/Crlf1/Cx3cl1/Epor/Gbe1/Gdf5/Gpi/Grin1/Grk1/Hmox1/Il6/Lcn2/Mdga2/Mir222/Mt1/Ngfr/Ntrk1/Ppargc1a/Ptprz1/Slc1a1/Sncb/Vegfa	25	0.0531915
BP	GO:0071356	cellular response to tumor necrosis factor	27/470	261/18913	0.103448	4.1628	8.21356	4.25831e-10	1.79546e-07	1.25956e-07	Adgre1/Ankrd1/Ass1/Birc3/Ccdc3/Ccl2/Ccl3/Ccl5/Cd40/Chi3l1/Cldn1/Cx3cl1/Fabp4/Il6/Lcn2/Mir221/Mir222/Mir27b/Mmp9/Nfkbia/Nos2/Plvap/Ppargc1a/Syk/Thbs1/Tnf/Zc3h12a	27	0.0574468
BP	GO:0061844	antimicrobial humoral immune response mediated by antimicrobial peptide	18/470	116/18913	0.155172	6.2442	9.04412	5.64412e-10	2.18145e-07	1.53035e-07	Adm/Ccl2/Ccl20/Ccl3/Ccl4/Ccl5/Ccl7/Cx3cl1/Cxcl1/Cxcl10/Cxcl14/Cxcl2/Cxcl3/Cxcl6/Evpl/Il17f/Nod2/Pglyrp1	18	0.0382979
BP	GO:0030595	leukocyte chemotaxis	25/470	231/18913	0.108225	4.35502	8.19015	7.41612e-10	2.64584e-07	1.85613e-07	Ccl2/Ccl3/Ccl4/Ccl5/Ccl7/Coro1a/Cx3cl1/Cxcl1/Cxcl10/Cxcl14/Cxcl16/Cxcl2/Cxcl3/Cxcl6/Cyp19a1/Fcgr2a/Il1b/Il34/Mmp9/Nod2/Pla2g7/Syk/Thbs1/Vav3/Vegfa	25	0.0531915
BP	GO:0051402	neuron apoptotic process	34/470	409/18913	0.0831296	3.34517	7.65429	8.38115e-10	2.76527e-07	1.93991e-07	Adora2a/Bnip3/Ccl2/Ccl3/Cntfr/Coro1a/Crlf1/Cx3cl1/Egln1/Egln3/Epor/Gbe1/Gch1/Gdf5/Gpi/Grin1/Grk1/Hmox1/Il1b/Il6/Kcnma1/Lcn2/Mdga2/Mir222/Mt1/Ngfr/Ntrk1/Ppargc1a/Ppp2r2b/Ptprz1/Slc1a1/Sncb/Tnf/Vegfa	34	0.0723404
BP	GO:0071706	tumor necrosis factor superfamily cytokine production	24/470	216/18913	0.111111	4.47116	8.19063	9.53952e-10	2.76527e-07	1.93991e-07	Acp5/Bcl3/Ccl2/Ccl3/Ccl4/Cidea/Cx3cl1/Fcgr2a/Il12b/Il17f/Il1a/Il6/Kcnn4/Mir101a/Mir27b/Nod2/Syk/Thbs1/Tlr2/Tmem106a/Tnfaip3/Tspo/Vsir/Zc3h12a	24	0.0510638
BP	GO:1903555	regulation of tumor necrosis factor superfamily cytokine production	24/470	216/18913	0.111111	4.47116	8.19063	9.53952e-10	2.76527e-07	1.93991e-07	Acp5/Bcl3/Ccl2/Ccl3/Ccl4/Cidea/Cx3cl1/Fcgr2a/Il12b/Il17f/Il1a/Il6/Kcnn4/Mir101a/Mir27b/Nod2/Syk/Thbs1/Tlr2/Tmem106a/Tnfaip3/Tspo/Vsir/Zc3h12a	24	0.0510638
BP	GO:0002687	positive regulation of leukocyte migration	21/470	168/18913	0.125	5.03005	8.37577	1.26478e-09	3.4506e-07	2.42069e-07	Bdkrb1/Ccl2/Ccl20/Ccl3/Ccl4/Ccl5/Ccl7/Coro1a/Cx3cl1/Cxcl10/Cxcl14/Il1a/Il1b/Il34/Mmp9/Pla2g7/Plvap/Thbs1/Tlr2/Tnfrsf14/Vegfa	21	0.0446809
BP	GO:0006959	humoral immune response	26/470	257/18913	0.101167	4.07102	7.913	1.45763e-09	3.75584e-07	2.63482e-07	Adm/Bcl3/C1s/C3/Ccl2/Ccl20/Ccl3/Ccl4/Ccl5/Ccl7/Cd69/Cx3cl1/Cxcl1/Cxcl10/Cxcl14/Cxcl2/Cxcl3/Cxcl6/Evpl/Il17f/Il1b/Nod2/Pglyrp1/RT1-Bb/Slpi/Tnf	26	0.0553191
BP	GO:0019730	antimicrobial humoral response	20/470	155/18913	0.129032	5.19231	8.3662	1.78976e-09	4.33764e-07	3.04297e-07	Adm/Bcl3/Ccl2/Ccl20/Ccl3/Ccl4/Ccl5/Ccl7/Cx3cl1/Cxcl1/Cxcl10/Cxcl14/Cxcl2/Cxcl3/Cxcl6/Evpl/Il17f/Nod2/Pglyrp1/Slpi	20	0.0425532
BP	GO:1901342	regulation of vasculature development	32/470	380/18913	0.0842105	3.38867	7.5089	1.94343e-09	4.33764e-07	3.04297e-07	Adm/C3/Ccl2/Ccl5/Cd40/Chi3l1/Crhr2/Cxcl10/Cxcr4/Egln1/Hk2/Hmox1/Il17f/Il1a/Il1b/Mir101a/Mir146a/Mir221/Mir222/Mir23b/Mir27b/Mmp9/Ngfr/Notch4/Ntrk1/Pgk1/Tgm2/Thbs1/Tnf/Vegfa/Wnt4/Zc3h12a	32	0.0680851
BP	GO:0097529	myeloid leukocyte migration	25/470	242/18913	0.103306	4.15707	7.8906	1.964e-09	4.33764e-07	3.04297e-07	Ccl2/Ccl3/Ccl4/Ccl5/Ccl7/Cx3cl1/Cxcl1/Cxcl10/Cxcl2/Cxcl3/Cxcl6/Cyp19a1/Fcgr2a/Il1a/Il1b/Il34/Mir146a/Mmp9/Nod2/Pla2g7/Syk/Thbs1/Tlr2/Vav3/Vegfa	25	0.0531915
BP	GO:0032355	response to estradiol	26/470	266/18913	0.0977444	3.93327	7.69114	3.03705e-09	6.40265e-07	4.49164e-07	Adcyap1r1/Ass1/C3/Ccl2/Cxcl1/Cxcl2/Cyp19a1/Dhh/Eno2/Gpi/Hsd11b1/Htr6/Il1b/Il6/Mir221/Mmp3/Mmp9/Nefh/Nos2/Npy1r/Ppargc1a/Ptgs2/Rgs9/Sstr2/Vegfa/Wnt4	26	0.0553191
BP	GO:0032640	tumor necrosis factor production	23/470	213/18913	0.107981	4.34521	7.8378	3.73659e-09	7.22095e-07	5.0657e-07	Acp5/Bcl3/Ccl2/Ccl3/Ccl4/Cidea/Cx3cl1/Fcgr2a/Il12b/Il1a/Il6/Kcnn4/Mir101a/Mir27b/Nod2/Syk/Thbs1/Tlr2/Tmem106a/Tnfaip3/Tspo/Vsir/Zc3h12a	23	0.0489362
BP	GO:0032680	regulation of tumor necrosis factor production	23/470	213/18913	0.107981	4.34521	7.8378	3.73659e-09	7.22095e-07	5.0657e-07	Acp5/Bcl3/Ccl2/Ccl3/Ccl4/Cidea/Cx3cl1/Fcgr2a/Il12b/Il1a/Il6/Kcnn4/Mir101a/Mir27b/Nod2/Syk/Thbs1/Tlr2/Tmem106a/Tnfaip3/Tspo/Vsir/Zc3h12a	23	0.0489362
BP	GO:0002685	regulation of leukocyte migration	25/470	252/18913	0.0992063	3.99211	7.63329	4.52853e-09	8.40132e-07	5.89376e-07	Bdkrb1/Ccl2/Ccl20/Ccl3/Ccl4/Ccl5/Ccl7/Cd69/Coro1a/Cx3cl1/Cxcl10/Cxcl14/Cyp19a1/Il1a/Il1b/Il34/Mir146a/Mmp9/Nod2/Pla2g7/Plvap/Thbs1/Tlr2/Tnfrsf14/Vegfa	25	0.0531915
BP	GO:0001659	temperature homeostasis	22/470	199/18913	0.110553	4.44869	7.80727	5.28023e-09	9.41911e-07	6.60777e-07	Adrb3/Apln/Ccl5/Cidea/Clstn3/Cxcr4/Fabp4/Ffar4/G0s2/Il1a/Il1b/Il1rn/Kdm3a/Lcn2/Nmu/Nod2/Ppargc1a/Ptgs2/Syk/Tnf/Vegfa/Wnt10b	22	0.0468085
BP	GO:0050727	regulation of inflammatory response	33/470	419/18913	0.0787589	3.16929	7.16823	5.77818e-09	9.92564e-07	6.96311e-07	Acp5/Adora2a/Armh4/C3/Ccl3/Ccl5/Cd28/Cx3cl1/Cyp19a1/Dnase1l3/Fabp4/Fcgr2a/Ffar4/Ier3/Il12b/Il1b/Il6/Kcnn4/Map3k8/Mir146a/Mir221/Mir222/Nfkbia/Nfkbiz/Nod2/Pglyrp1/Pglyrp2/Pla2g5/Ptgs2/Tlr2/Tnf/Tnfaip3/Usp18	33	0.0702128
BP	GO:0009612	response to mechanical stimulus	31/470	377/18913	0.0822281	3.30889	7.22884	6.16581e-09	1.02132e-06	7.16485e-07	Acp5/Acta1/Adgrv1/Ankrd1/Bdkrb1/Bnip3/Ccl2/Cd40/Chi3l1/Cxcl10/Cxcr4/Fosl1/Gdf5/Gpi/Il1b/Il6/Kcnj4/Mgp/Mmp13/Mmp3/Mmp9/Nfkbia/Nos2/Nrxn2/Ntrk1/Phf24/Ptgs2/Slc2a1/Thbs1/Tnf/Vegfa	31	0.0659574
BP	GO:0031649	heat generation	9/470	26/18913	0.346154	13.9294	10.5314	7.18755e-09	1.14951e-06	8.06415e-07	Adrb3/Apln/Ccl5/Il1a/Il1b/Il1rn/Nmu/Ptgs2/Tnf	9	0.0191489
BP	GO:0048660	regulation of smooth muscle cell proliferation	23/470	221/18913	0.104072	4.18792	7.60987	7.60533e-09	1.17578e-06	8.24845e-07	Apln/Ccl5/Cnn1/Cx3cl1/Hmox1/Id2/Il12b/Il6/Kcnn4/Mir146a/Mir221/Mir222/Mmp9/Ndrg2/P2ry6/Ppargc1a/Ptgs2/Rgs5/Tgm2/Thbs1/Tnf/Tnfaip3/Vegfa	23	0.0489362
BP	GO:0034341	response to type II interferon	19/470	154/18913	0.123377	4.96473	7.88625	9.6979e-09	1.43118e-06	1.00401e-06	Ass1/Ccl2/Ccl3/Ccl5/Cd40/Cldn1/Cxcl16/Dapk1/Gbp7/Gch1/Il12b/Irf8/Nos2/Otop1/RT1-Bb/Serpina3n/Slc11a1/Tlr2/Tnf	19	0.0404255
BP	GO:0060326	cell chemotaxis	28/470	322/18913	0.0869565	3.49917	7.22061	1.01432e-08	1.43118e-06	1.00401e-06	Ccl2/Ccl20/Ccl3/Ccl4/Ccl5/Ccl7/Coro1a/Cx3cl1/Cxcl1/Cxcl10/Cxcl14/Cxcl16/Cxcl2/Cxcl3/Cxcl6/Cxcr4/Cyp19a1/Fcgr2a/Fgf16/Il1b/Il34/Mmp9/Nod2/Pla2g7/Syk/Thbs1/Vav3/Vegfa	28	0.0595745
BP	GO:1990868	response to chemokine	15/470	94/18913	0.159574	6.42134	8.41152	1.04916e-08	1.43118e-06	1.00401e-06	Ccl2/Ccl20/Ccl3/Ccl4/Ccl5/Ccl7/Cx3cl1/Cxcl1/Cxcl10/Cxcl2/Cxcl3/Cxcl6/Cxcr4/Mir101a/Zc3h12a	15	0.0319149
BP	GO:1990869	cellular response to chemokine	15/470	94/18913	0.159574	6.42134	8.41152	1.04916e-08	1.43118e-06	1.00401e-06	Ccl2/Ccl20/Ccl3/Ccl4/Ccl5/Ccl7/Cx3cl1/Cxcl1/Cxcl10/Cxcl2/Cxcl3/Cxcl6/Cxcr4/Mir101a/Zc3h12a	15	0.0319149
BP	GO:0008217	regulation of blood pressure	23/470	228/18913	0.100877	4.05934	7.41909	1.37788e-08	1.82589e-06	1.28091e-06	Abcc9/Acta1/Acta2/Actg2/Adm/Adrb3/Apln/Bdkrb1/Bdkrb2/Crhr2/Enpep/Gch1/Gucy1a1/Hmox1/Id2/Ier3/Kcnn4/Nmu/Nos2/Npy1r/Ptgs2/Slc2a5/Tnf	23	0.0489362
BP	GO:0045765	regulation of angiogenesis	30/470	370/18913	0.0810811	3.26274	7.01693	1.50104e-08	1.90047e-06	1.33323e-06	Adm/C3/Ccl2/Ccl5/Cd40/Chi3l1/Crhr2/Cxcl10/Cxcr4/Egln1/Hk2/Hmox1/Il17f/Il1a/Il1b/Mir146a/Mir221/Mir222/Mir23b/Mir27b/Mmp9/Ngfr/Notch4/Ntrk1/Pgk1/Tgm2/Thbs1/Tnf/Vegfa/Zc3h12a	30	0.0638298
BP	GO:0070372	regulation of ERK1 and ERK2 cascade	28/470	328/18913	0.0853659	3.43516	7.10207	1.51612e-08	1.90047e-06	1.33323e-06	Acta2/C1ql4/C3/Ccl3/Chi3l1/Crhr2/Csf2/Cxcr4/Dusp4/Epor/Ffar4/Il1a/Il1b/Il6/Mir221/Mir27b/Mos/Mturn/Ndrg2/Nod2/Ntrk1/P2ry6/Pla2g2a/Pla2g5/Ptprr/Syk/Tlr2/Vegfa	28	0.0595745
BP	GO:0070098	chemokine-mediated signaling pathway	14/470	83/18913	0.168675	6.78754	8.43548	1.56013e-08	1.90418e-06	1.33584e-06	Ccl2/Ccl20/Ccl3/Ccl4/Ccl5/Ccl7/Cx3cl1/Cxcl1/Cxcl10/Cxcl2/Cxcl3/Cxcl6/Cxcr4/Mir101a	14	0.0297872
BP	GO:0003018	vascular process in circulatory system	25/470	269/18913	0.0929368	3.73982	7.22487	1.69877e-08	1.97502e-06	1.38553e-06	Abcc9/Acta1/Acta2/Actg2/Adm/Adora2a/Adrb3/Apln/Bdkrb2/Ccl4/Cx3cl1/Faah/Gch1/Gucy1a1/Irag1/Kcnma1/Kcnmb1/Mfsd2a/Npy1r/Plvap/Ptgs2/Slc2a1/Slc2a3/Tnf/Vegfa	25	0.0531915
BP	GO:0071347	cellular response to interleukin-1	17/470	127/18913	0.133858	5.38651	7.91783	1.70334e-08	1.97502e-06	1.38553e-06	Ankrd1/Ccl2/Ccl3/Ccl5/Cd40/Chi3l1/Cxcl2/Il1b/Il1rn/Il6/Lcn2/Mir146a/Mmp3/Mmp9/Nfkbia/Nos2/Serpina3n	17	0.0361702
BP	GO:0048659	smooth muscle cell proliferation	23/470	232/18913	0.0991379	3.98935	7.31346	1.91414e-08	2.16531e-06	1.51902e-06	Apln/Ccl5/Cnn1/Cx3cl1/Hmox1/Id2/Il12b/Il6/Kcnn4/Mir146a/Mir221/Mir222/Mmp9/Ndrg2/P2ry6/Ppargc1a/Ptgs2/Rgs5/Tgm2/Thbs1/Tnf/Tnfaip3/Vegfa	23	0.0489362
BP	GO:0002697	regulation of immune effector process	33/470	451/18913	0.0731707	2.94442	6.67177	3.45572e-08	3.8161e-06	2.6771e-06	Acp5/C3/Ccl2/Cd28/Cd40/Cd69/Cxcl1/Cxcl6/Dnase1l3/Evpl/Fcgr2a/Gpi/Hmox1/Il12b/Il17f/Il1b/Il6/Nfkbiz/Nod2/Pglyrp1/Pglyrp2/Pla2g5/RT1-CE1/RT1-CE16/RT1-DMb/RT1-S3/Rsad2/Syk/Tlr2/Tnf/Tnfrsf14/Vsir/Zc3h12a	33	0.0702128
BP	GO:0022407	regulation of cell-cell adhesion	35/470	500/18913	0.07	2.81683	6.57262	3.98124e-08	4.29418e-06	3.01249e-06	Adora2a/Ass1/Ccl2/Ccl5/Cd28/Cd69/Coro1a/Cx3cl1/Dtx1/Fcho1/Il12b/Il1a/Il1b/Il1rn/Il6/Mdga2/Mir146a/Mir221/Mir222/Nfkbiz/Notch4/Pla2g5/Podxl/RT1-Bb/RT1-CE16/RT1-DMb/Syk/Tnf/Tnfrsf14/Vegfa/Vsir/Wnt10b/Wnt4/Zap70/Zc3h12a	35	0.0744681
BP	GO:0002544	chronic inflammatory response	9/470	31/18913	0.290323	11.6827	9.50254	4.15211e-08	4.3767e-06	3.07037e-06	Ccl2/Ccl5/Cyp19a1/Il1b/Il1rn/Nfkbiz/Thbs1/Tnf/Tnfaip3	9	0.0191489
BP	GO:0048661	positive regulation of smooth muscle cell proliferation	17/470	136/18913	0.125	5.03005	7.52955	4.80006e-08	4.94726e-06	3.47064e-06	Ccl5/Cx3cl1/Hmox1/Id2/Il6/Kcnn4/Mir146a/Mir221/Mir222/Mmp9/P2ry6/Ppargc1a/Ptgs2/Tgm2/Thbs1/Tnf/Vegfa	17	0.0361702
BP	GO:0070371	ERK1 and ERK2 cascade	28/470	355/18913	0.0788732	3.17389	6.60068	8.19641e-08	8.26412e-06	5.79751e-06	Acta2/C1ql4/C3/Ccl3/Chi3l1/Crhr2/Csf2/Cxcr4/Dusp4/Epor/Ffar4/Il1a/Il1b/Il6/Mir221/Mir27b/Mos/Mturn/Ndrg2/Nod2/Ntrk1/P2ry6/Pla2g2a/Pla2g5/Ptprr/Syk/Tlr2/Vegfa	28	0.0595745
BP	GO:0071248	cellular response to metal ion	23/470	252/18913	0.0912698	3.67274	6.81853	8.88805e-08	8.7708e-06	6.15296e-06	Abcc9/Acta1/Adgrv1/Atp7b/Bnip3/Cacna1h/Cldn1/Cpne5/Cyp1a1/Fabp4/Grin1/Hmox1/Id2/Mmp9/Mt1/Mt2A/Nos2/Ppargc1a/Ptgs2/Slc11a1/Slc1a1/Slc41a1/Tspo	23	0.0489362
BP	GO:0051384	response to glucocorticoid	26/470	317/18913	0.0820189	3.30048	6.59386	1.10984e-07	1.07238e-05	7.52304e-06	Adm/Aldh3a1/Ass1/C3/Ccl2/Ccl5/Cldn1/Crhr2/Cxcl1/Cxcl2/Ddit4/Fabp4/Fosl1/Hey1/Il1b/Il1rn/Il6/Mgp/Nos2/Ptgs2/RT1-Bb/Serpina3n/Sstr2/Stc1/Tnf/Vegfa	26	0.0553191
BP	GO:0071456	cellular response to hypoxia	22/470	237/18913	0.092827	3.7354	6.7648	1.26054e-07	1.19314e-05	8.37019e-06	Ak4/Ankrd1/Bdkrb2/Bnip3/Cox4i2/Egln1/Egln3/Ero1a/Higd1a/Kcnmb1/Kcnn4/Lcn2/Mgarp/Mir146a/Mir222/Ndrg1/Pgk1/Ppargc1a/Ptgs2/Stc1/Stc2/Vegfa	22	0.0468085
BP	GO:0001562	response to protozoan	9/470	35/18913	0.257143	10.3475	8.83599	1.33121e-07	1.23483e-05	8.66269e-06	Batf/Bcl3/Cd40/Gbp7/Ier3/Il12b/Il6/Irf8/Slc11a1	9	0.0191489
BP	GO:0036294	cellular response to decreased oxygen levels	23/470	258/18913	0.0891473	3.58732	6.67982	1.36415e-07	1.24057e-05	8.70294e-06	Ak4/Ankrd1/Bdkrb2/Bnip3/Cox4i2/Egln1/Egln3/Ero1a/Higd1a/Kcnmb1/Kcnn4/Lcn2/Mgarp/Mir146a/Mir221/Mir222/Ndrg1/Pgk1/Ppargc1a/Ptgs2/Stc1/Stc2/Vegfa	23	0.0489362
BP	GO:0071677	positive regulation of mononuclear cell migration	14/470	99/18913	0.141414	5.69057	7.46972	1.55987e-07	1.39129e-05	9.76025e-06	Ccl2/Ccl20/Ccl3/Ccl4/Ccl5/Ccl7/Coro1a/Cx3cl1/Cxcl10/Cxcl14/Il34/Pla2g7/Thbs1/Tnfrsf14	14	0.0297872
BP	GO:1990266	neutrophil migration	15/470	115/18913	0.130435	5.24875	7.29552	1.67882e-07	1.46913e-05	1.03063e-05	Ccl2/Ccl3/Cx3cl1/Cxcl1/Cxcl10/Cxcl2/Cxcl3/Cxcl6/Fcgr2a/Il1a/Il1b/Nod2/Syk/Tlr2/Vav3	15	0.0319149
BP	GO:0070374	positive regulation of ERK1 and ERK2 cascade	21/470	222/18913	0.0945946	3.80653	6.71477	1.77337e-07	1.52313e-05	1.06852e-05	Acta2/C3/Ccl3/Chi3l1/Csf2/Cxcr4/Epor/Ffar4/Il1a/Il1b/Il6/Mir27b/Mos/Mturn/Nod2/Ntrk1/P2ry6/Pla2g2a/Pla2g5/Tlr2/Vegfa	21	0.0446809
BP	GO:0072593	reactive oxygen species metabolic process	23/470	263/18913	0.0874525	3.51912	6.56735	1.92923e-07	1.58528e-05	1.11212e-05	Abcc9/Acp5/Birc3/Bnip3/Cxcl1/Cyp1a1/Ddit4/Gch1/Grin1/Hk2/Ier3/Lcn2/Mapt/Mir27b/Mmp3/Ngfr/Nos2/Slc1a1/Syk/Thbs1/Tnf/Tspo/Zc3h12a	23	0.0489362
BP	GO:0035296	regulation of tube diameter	20/470	204/18913	0.0980392	3.94514	6.75146	1.94827e-07	1.58528e-05	1.11212e-05	Abcc9/Acta1/Acta2/Actg2/Adm/Adora2a/Adrb3/Apln/Bdkrb2/Cx3cl1/Faah/Gch1/Gucy1a1/Irag1/Kcnma1/Kcnmb1/Npy1r/Ptgs2/Tnf/Vegfa	20	0.0425532
BP	GO:0097746	blood vessel diameter maintenance	20/470	204/18913	0.0980392	3.94514	6.75146	1.94827e-07	1.58528e-05	1.11212e-05	Abcc9/Acta1/Acta2/Actg2/Adm/Adora2a/Adrb3/Apln/Bdkrb2/Cx3cl1/Faah/Gch1/Gucy1a1/Irag1/Kcnma1/Kcnmb1/Npy1r/Ptgs2/Tnf/Vegfa	20	0.0425532
BP	GO:0007263	nitric oxide mediated signal transduction	8/470	27/18913	0.296296	11.9231	9.06691	2.00847e-07	1.60609e-05	1.12671e-05	Gucy1a1/Gucy1b1/Mt1/Mt2A/Nos2/Rasd1/Thbs1/Vegfa	8	0.0170213
BP	GO:0035150	regulation of tube size	20/470	205/18913	0.097561	3.9259	6.72394	2.11006e-07	1.65872e-05	1.16364e-05	Abcc9/Acta1/Acta2/Actg2/Adm/Adora2a/Adrb3/Apln/Bdkrb2/Cx3cl1/Faah/Gch1/Gucy1a1/Irag1/Kcnma1/Kcnmb1/Npy1r/Ptgs2/Tnf/Vegfa	20	0.0425532
BP	GO:1903037	regulation of leukocyte cell-cell adhesion	28/470	374/18913	0.0748663	3.01265	6.27572	2.41478e-07	1.86662e-05	1.30949e-05	Adora2a/Ass1/Ccl2/Ccl5/Cd28/Cd69/Coro1a/Dtx1/Fcho1/Il12b/Il1a/Il1b/Il6/Mir146a/Mir221/Mir222/Nfkbiz/Pla2g5/RT1-Bb/RT1-CE16/RT1-DMb/Syk/Tnf/Tnfrsf14/Vsir/Wnt10b/Zap70/Zc3h12a	28	0.0595745
BP	GO:0030593	neutrophil chemotaxis	13/470	88/18913	0.147727	5.94461	7.42177	2.5724e-07	1.95587e-05	1.3721e-05	Ccl2/Ccl3/Cx3cl1/Cxcl1/Cxcl10/Cxcl2/Cxcl3/Cxcl6/Fcgr2a/Il1b/Nod2/Syk/Vav3	13	0.0276596
BP	GO:0071675	regulation of mononuclear cell migration	17/470	154/18913	0.11039	4.44212	6.84674	2.99012e-07	2.2368e-05	1.56918e-05	Ccl2/Ccl20/Ccl3/Ccl4/Ccl5/Ccl7/Cd69/Coro1a/Cx3cl1/Cxcl10/Cxcl14/Cyp19a1/Il34/Mir146a/Pla2g7/Thbs1/Tnfrsf14	17	0.0361702
BP	GO:2000377	regulation of reactive oxygen species metabolic process	18/470	175/18913	0.102857	4.13902	6.65967	3.90431e-07	2.87431e-05	2.01641e-05	Acp5/Birc3/Bnip3/Cxcl1/Gch1/Grin1/Hk2/Ier3/Lcn2/Mapt/Mir27b/Mmp3/Ngfr/Syk/Thbs1/Tnf/Tspo/Zc3h12a	18	0.0382979
BP	GO:0120254	olefinic compound metabolic process	18/470	178/18913	0.101124	4.06926	6.56777	5.0297e-07	3.55578e-05	2.49448e-05	Abca4/Adh1c/Adh6/Adh7/Akr1b10/Bdkrb1/Cacna1h/Cyp19a1/Cyp1a1/Cyp2c11/Grin1/Gsta1/Kcnma1/Ppargc1a/Ptgs2/Rbp1/Rbp2/Wnt4	18	0.0382979
BP	GO:0006935	chemotaxis	31/470	458/18913	0.0676856	2.7237	5.96127	5.03675e-07	3.55578e-05	2.49448e-05	C3/Ccl2/Ccl20/Ccl3/Ccl4/Ccl5/Ccl7/Coro1a/Cx3cl1/Cxcl1/Cxcl10/Cxcl14/Cxcl16/Cxcl2/Cxcl3/Cxcl6/Cxcr4/Cyp19a1/Fcgr2a/Fgf16/Il1b/Il34/Mmp9/Nod2/Ntn1/Pla2g7/Slit1/Syk/Thbs1/Vav3/Vegfa	31	0.0659574
BP	GO:0071346	cellular response to type II interferon	15/470	125/18913	0.12	4.82885	6.85623	5.05997e-07	3.55578e-05	2.49448e-05	Ass1/Ccl2/Ccl3/Ccl5/Cldn1/Dapk1/Gbp7/Il12b/Irf8/Nos2/Otop1/RT1-Bb/Serpina3n/Tlr2/Tnf	15	0.0319149
BP	GO:0071453	cellular response to oxygen levels	23/470	278/18913	0.0827338	3.32924	6.24561	5.17524e-07	3.5825e-05	2.51322e-05	Ak4/Ankrd1/Bdkrb2/Bnip3/Cox4i2/Egln1/Egln3/Ero1a/Higd1a/Kcnmb1/Kcnn4/Lcn2/Mgarp/Mir146a/Mir221/Mir222/Ndrg1/Pgk1/Ppargc1a/Ptgs2/Stc1/Stc2/Vegfa	23	0.0489362
BP	GO:0007159	leukocyte cell-cell adhesion	29/470	412/18913	0.0703883	2.83246	6.00325	5.32474e-07	3.63179e-05	2.5478e-05	Adora2a/Ass1/Ccl2/Ccl5/Cd28/Cd69/Coro1a/Dtx1/Fcho1/Il12b/Il1a/Il1b/Il6/Mir146a/Mir221/Mir222/Nfkbiz/Pla2g5/RT1-Bb/RT1-CE16/RT1-DMb/Syk/Thbs1/Tnf/Tnfrsf14/Vsir/Wnt10b/Zap70/Zc3h12a	29	0.0617021
BP	GO:0042330	taxis	31/470	460/18913	0.0673913	2.71185	5.93354	5.53183e-07	3.71835e-05	2.60852e-05	C3/Ccl2/Ccl20/Ccl3/Ccl4/Ccl5/Ccl7/Coro1a/Cx3cl1/Cxcl1/Cxcl10/Cxcl14/Cxcl16/Cxcl2/Cxcl3/Cxcl6/Cxcr4/Cyp19a1/Fcgr2a/Fgf16/Il1b/Il34/Mmp9/Nod2/Ntn1/Pla2g7/Slit1/Syk/Thbs1/Vav3/Vegfa	31	0.0659574
BP	GO:0060354	negative regulation of cell adhesion molecule production	6/470	14/18913	0.428571	17.2459	9.70711	5.78431e-07	3.83252e-05	2.68862e-05	Mir101a/Mir146a/Mir221/Mir222/Mir27b/Notch4	6	0.012766
BP	GO:0002250	adaptive immune response	30/470	438/18913	0.0684932	2.75619	5.93634	6.02182e-07	3.91523e-05	2.74664e-05	Adgre1/Batf/Bcl3/C1s/C3/Cd28/Cd40/Cd69/Fcgr2a/Il12b/Il17f/Il1b/Il6/Nfkbiz/Nod2/RT1-Bb/RT1-CE1/RT1-CE16/RT1-DMb/RT1-S3/Rsad2/Slc11a1/Slfn2/Syk/Tnf/Tnfaip3/Tnfrsf14/Vegfa/Vsir/Zc3h12a	30	0.0638298
BP	GO:0002819	regulation of adaptive immune response	21/470	239/18913	0.0878661	3.53577	6.29784	6.07798e-07	3.91523e-05	2.74664e-05	C3/Cd28/Cd40/Cd69/Fcgr2a/Il12b/Il1b/Il6/Nfkbiz/Nod2/RT1-Bb/RT1-CE1/RT1-CE16/RT1-S3/Rsad2/Slc11a1/Tnf/Tnfaip3/Tnfrsf14/Vsir/Zc3h12a	21	0.0446809
BP	GO:0070555	response to interleukin-1	17/470	162/18913	0.104938	4.22276	6.5762	6.17728e-07	3.92469e-05	2.75328e-05	Ankrd1/Ccl2/Ccl3/Ccl5/Cd40/Chi3l1/Cxcl2/Il1b/Il1rn/Il6/Lcn2/Mir146a/Mmp3/Mmp9/Nfkbia/Nos2/Serpina3n	17	0.0361702
BP	GO:0042832	defense response to protozoan	8/470	31/18913	0.258065	10.3846	8.34787	6.53948e-07	4.09866e-05	2.87533e-05	Batf/Bcl3/Cd40/Gbp7/Il12b/Il6/Irf8/Slc11a1	8	0.0170213
BP	GO:0009750	response to fructose	7/470	22/18913	0.318182	12.8038	8.84314	6.90847e-07	4.2722e-05	2.99706e-05	Khk/Lcn2/Nos2/Ppargc1a/Ptgs2/Slc2a5/Tnf	7	0.0148936
BP	GO:1903587	regulation of blood vessel endothelial cell proliferation involved in sprouting angiogenesis	9/470	42/18913	0.214286	8.62295	7.895	7.2034e-07	4.39597e-05	3.08389e-05	Hmox1/Il12b/Mir101a/Mir146a/Mir222/Mir27b/Ngfr/Thbs1/Vegfa	9	0.0191489
BP	GO:0050729	positive regulation of inflammatory response	17/470	164/18913	0.103659	4.17126	6.51129	7.35144e-07	4.42805e-05	3.1064e-05	C3/Ccl3/Ccl5/Cd28/Cx3cl1/Fabp4/Fcgr2a/Il1b/Il6/Kcnn4/Map3k8/Nfkbia/Nfkbiz/Nod2/Ptgs2/Tlr2/Tnf	17	0.0361702
BP	GO:0048247	lymphocyte chemotaxis	9/470	43/18913	0.209302	8.42241	7.77849	8.9115e-07	5.23184e-05	3.67028e-05	Ccl2/Ccl3/Ccl4/Ccl5/Ccl7/Cx3cl1/Cxcl10/Cxcl14/Cxcl16	9	0.0191489
BP	GO:2000403	positive regulation of lymphocyte migration	9/470	43/18913	0.209302	8.42241	7.77849	8.9115e-07	5.23184e-05	3.67028e-05	Ccl20/Ccl3/Ccl4/Ccl5/Ccl7/Coro1a/Cxcl10/Cxcl14/Tnfrsf14	9	0.0191489
BP	GO:0071674	mononuclear cell migration	20/470	225/18913	0.0888889	3.57693	6.20746	9.38164e-07	5.40435e-05	3.7913e-05	Ccl2/Ccl20/Ccl3/Ccl4/Ccl5/Ccl7/Cd69/Coro1a/Cx3cl1/Cxcl10/Cxcl14/Cxcl16/Cyp19a1/Il34/Kcnn4/Mir146a/Mmp9/Pla2g7/Thbs1/Tnfrsf14	20	0.0425532
BP	GO:0031652	positive regulation of heat generation	6/470	15/18913	0.4	16.0962	9.33698	9.43839e-07	5.40435e-05	3.7913e-05	Apln/Ccl5/Il1b/Nmu/Ptgs2/Tnf	6	0.012766
BP	GO:0031960	response to corticosteroid	26/470	355/18913	0.0732394	2.94719	5.91232	9.88594e-07	5.59159e-05	3.92265e-05	Adm/Aldh3a1/Ass1/C3/Ccl2/Ccl5/Cldn1/Crhr2/Cxcl1/Cxcl2/Ddit4/Fabp4/Fosl1/Hey1/Il1b/Il1rn/Il6/Mgp/Nos2/Ptgs2/RT1-Bb/Serpina3n/Sstr2/Stc1/Tnf/Vegfa	26	0.0553191
BP	GO:0002822	regulation of adaptive immune response based on somatic recombination of immune receptors built from immunoglobulin superfamily domains	20/470	226/18913	0.0884956	3.5611	6.18319	1.00598e-06	5.62136e-05	3.94354e-05	C3/Cd28/Cd40/Cd69/Fcgr2a/Il12b/Il1b/Il6/Nfkbiz/Nod2/RT1-Bb/RT1-CE1/RT1-CE16/RT1-S3/Rsad2/Slc11a1/Tnf/Tnfaip3/Vsir/Zc3h12a	20	0.0425532
BP	GO:0052548	regulation of endopeptidase activity	24/470	311/18913	0.0771704	3.10537	5.97628	1.03e-06	5.68707e-05	3.98963e-05	Adora2a/Aph1b/Dapk1/Egln3/Gpi/Il6/Mir27b/Mmp9/Ngfr/Psmb8/Ptgs2/Ret/Rhbdf2/Serpina3a/Serpina3n/Serpinb10/Serpinb2/Slc1a1/Syk/Thbs1/Tnf/Tnfsf15/Vegfa/Vsir	24	0.0510638
BP	GO:0002824	positive regulation of adaptive immune response based on somatic recombination of immune receptors built from immunoglobulin superfamily domains	16/470	150/18913	0.106667	4.29231	6.46245	1.06026e-06	5.7853e-05	4.05855e-05	C3/Cd28/Cd40/Fcgr2a/Il12b/Il1b/Il6/Nfkbiz/Nod2/RT1-Bb/RT1-CE1/RT1-CE16/RT1-S3/Rsad2/Slc11a1/Tnf	16	0.0340426
BP	GO:0033002	muscle cell proliferation	24/470	314/18913	0.0764331	3.0757	5.92089	1.22151e-06	6.48416e-05	4.54882e-05	Apln/Ccl5/Cnn1/Cx3cl1/Hmox1/Id2/Il12b/Il6/Kcnn4/Mir146a/Mir221/Mir222/Mmp9/Ndrg2/P2ry6/Ppargc1a/Ptgs2/Rgs5/Tgfbr3/Tgm2/Thbs1/Tnf/Tnfaip3/Vegfa	24	0.0510638
BP	GO:0002688	regulation of leukocyte chemotaxis	15/470	134/18913	0.11194	4.50453	6.49901	1.24427e-06	6.48416e-05	4.54882e-05	Ccl2/Ccl3/Ccl4/Ccl5/Ccl7/Cx3cl1/Cxcl10/Cxcl14/Cyp19a1/Il1b/Il34/Nod2/Pla2g7/Thbs1/Vegfa	15	0.0319149
BP	GO:0032612	interleukin-1 production	15/470	134/18913	0.11194	4.50453	6.49901	1.24427e-06	6.48416e-05	4.54882e-05	Acp5/Ccl20/Ccl3/Cx3cl1/Ffar4/Il6/Mir101a/Mir27b/Nod2/Panx3/Tlr2/Tmem106a/Tnf/Tnfaip3/Zc3h12a	15	0.0319149
BP	GO:0032652	regulation of interleukin-1 production	15/470	134/18913	0.11194	4.50453	6.49901	1.24427e-06	6.48416e-05	4.54882e-05	Acp5/Ccl20/Ccl3/Cx3cl1/Ffar4/Il6/Mir101a/Mir27b/Nod2/Panx3/Tlr2/Tmem106a/Tnf/Tnfaip3/Zc3h12a	15	0.0319149
BP	GO:0051048	negative regulation of secretion	20/470	230/18913	0.0869565	3.49917	6.08748	1.32432e-06	6.82464e-05	4.78767e-05	Crhr2/Ffar4/Fst/Gnaz/Hmox1/Htr6/Il12b/Il1b/Il1rn/Il6/Mir146a/Nmu/Npy1r/Pde1c/Rhbdf2/Rsad2/Sstr2/Stxbp5l/Tnf/Tspo	20	0.0425532
BP	GO:0045766	positive regulation of angiogenesis	19/470	210/18913	0.0904762	3.6408	6.14315	1.3435e-06	6.84744e-05	4.80367e-05	Adm/C3/Ccl5/Cd40/Chi3l1/Cxcr4/Hk2/Hmox1/Il1a/Il1b/Mir23b/Mir27b/Mmp9/Notch4/Ntrk1/Tgm2/Thbs1/Vegfa/Zc3h12a	19	0.0404255
BP	GO:0001660	fever generation	6/470	16/18913	0.375	15.0902	9.0008	1.47849e-06	7.45354e-05	5.22886e-05	Ccl5/Il1a/Il1b/Il1rn/Ptgs2/Tnf	6	0.012766
BP	GO:0001818	negative regulation of cytokine production	27/470	387/18913	0.0697674	2.80747	5.73506	1.56071e-06	7.78343e-05	5.46029e-05	Acp5/Bcl3/Cidea/Cx3cl1/Ffar4/Gbp7/Hmox1/Il12b/Il6/Mir101a/Mir146a/Mir221/Mir222/Mir27b/Ndrg2/Nod2/Pglyrp1/Pglyrp2/Slc11a1/Thbs1/Ticam2/Tlr2/Tnf/Tnfaip3/Tspo/Vsir/Zc3h12a	27	0.0574468
BP	GO:0002821	positive regulation of adaptive immune response	16/470	155/18913	0.103226	4.15385	6.29384	1.64416e-06	8.11233e-05	5.69103e-05	C3/Cd28/Cd40/Fcgr2a/Il12b/Il1b/Il6/Nfkbiz/Nod2/RT1-Bb/RT1-CE1/RT1-CE16/RT1-S3/Rsad2/Slc11a1/Tnf	16	0.0340426
BP	GO:1904018	positive regulation of vasculature development	19/470	213/18913	0.0892019	3.58952	6.06723	1.66274e-06	8.11766e-05	5.69476e-05	Adm/C3/Ccl5/Cd40/Chi3l1/Cxcr4/Hk2/Hmox1/Il1a/Il1b/Mir23b/Mir27b/Mmp9/Notch4/Ntrk1/Tgm2/Thbs1/Vegfa/Zc3h12a	19	0.0404255
BP	GO:2000401	regulation of lymphocyte migration	11/470	73/18913	0.150685	6.06363	6.91966	1.76265e-06	8.5158e-05	5.97407e-05	Ccl2/Ccl20/Ccl3/Ccl4/Ccl5/Ccl7/Cd69/Coro1a/Cxcl10/Cxcl14/Tnfrsf14	11	0.0234043
BP	GO:0046942	carboxylic acid transport	27/470	390/18913	0.0692308	2.78588	5.68892	1.80773e-06	8.55589e-05	6.00219e-05	Adora2a/Bdkrb2/Fabp4/Grm1/Htr6/Il1a/Il1b/Il1rn/Mfsd2a/Nos2/Pla2g2a/Pla2g5/Ptgs2/Rbp1/Rbp2/Rgs4/Slc11a1/Slc16a3/Slc1a1/Slc1a2/Slc1a6/Slc26a9/Slc2a1/Slc6a7/Syk/Thbs1/Tnf	27	0.0574468
BP	GO:1901623	regulation of lymphocyte chemotaxis	7/470	25/18913	0.28	11.2673	8.20042	1.82532e-06	8.55589e-05	6.00219e-05	Ccl2/Ccl3/Ccl4/Ccl5/Ccl7/Cxcl10/Cxcl14	7	0.0148936
BP	GO:0002699	positive regulation of immune effector process	23/470	299/18913	0.0769231	3.09542	5.83026	1.82629e-06	8.55589e-05	6.00219e-05	C3/Ccl2/Cd28/Cd40/Cxcl1/Fcgr2a/Gpi/Il12b/Il17f/Il1b/Il6/Nfkbiz/Nod2/Pla2g5/RT1-CE1/RT1-CE16/RT1-DMb/RT1-S3/Rsad2/Syk/Tlr2/Tnf/Tnfrsf14	23	0.0489362
BP	GO:0015849	organic acid transport	27/470	392/18913	0.0688776	2.77166	5.6584	1.99187e-06	9.2383e-05	6.48092e-05	Adora2a/Bdkrb2/Fabp4/Grm1/Htr6/Il1a/Il1b/Il1rn/Mfsd2a/Nos2/Pla2g2a/Pla2g5/Ptgs2/Rbp1/Rbp2/Rgs4/Slc11a1/Slc16a3/Slc1a1/Slc1a2/Slc1a6/Slc26a9/Slc2a1/Slc6a7/Syk/Thbs1/Tnf	27	0.0574468
BP	GO:0010573	vascular endothelial growth factor production	10/470	60/18913	0.166667	6.70674	7.06765	2.02264e-06	9.27089e-05	6.50379e-05	C3/Ccl2/Hpse/Il1a/Il1b/Il6/Mir146a/Ndrg2/Ptgs2/Tnf	10	0.0212766
BP	GO:0002690	positive regulation of leukocyte chemotaxis	13/470	105/18913	0.12381	4.98215	6.53195	2.03888e-06	9.27089e-05	6.50379e-05	Ccl2/Ccl3/Ccl4/Ccl5/Ccl7/Cx3cl1/Cxcl10/Cxcl14/Il1b/Il34/Pla2g7/Thbs1/Vegfa	13	0.0276596
BP	GO:1903557	positive regulation of tumor necrosis factor superfamily cytokine production	14/470	122/18913	0.114754	4.61775	6.3995	2.08605e-06	9.3933e-05	6.58966e-05	Ccl2/Ccl3/Ccl4/Fcgr2a/Il12b/Il17f/Il1a/Il6/Mir27b/Nod2/Syk/Thbs1/Tlr2/Tmem106a	14	0.0297872
BP	GO:0002460	adaptive immune response based on somatic recombination of immune receptors built from immunoglobulin superfamily domains	25/470	348/18913	0.0718391	2.89084	5.68326	2.26278e-06	9.94158e-05	6.97429e-05	Batf/Bcl3/C1s/C3/Cd28/Cd40/Cd69/Fcgr2a/Il12b/Il1b/Il6/Nfkbiz/Nod2/RT1-Bb/RT1-CE1/RT1-CE16/RT1-S3/Rsad2/Slc11a1/Slfn2/Tnf/Tnfaip3/Vegfa/Vsir/Zc3h12a	25	0.0531915
BP	GO:0019233	sensory perception of pain	13/470	106/18913	0.122642	4.93515	6.48569	2.27212e-06	9.94158e-05	6.97429e-05	Ano1/Ccl2/Ccl3/Chrna4/Cxcr4/Grin1/Grm1/Kcna2/Nmu/Npy1r/Ntrk1/Phf24/Tnf	13	0.0276596
BP	GO:0072676	lymphocyte migration	13/470	106/18913	0.122642	4.93515	6.48569	2.27212e-06	9.94158e-05	6.97429e-05	Ccl2/Ccl20/Ccl3/Ccl4/Ccl5/Ccl7/Cd69/Coro1a/Cx3cl1/Cxcl10/Cxcl14/Cxcl16/Tnfrsf14	13	0.0276596
BP	GO:0008347	glial cell migration	11/470	75/18913	0.146667	5.90193	6.79019	2.32029e-06	0.000100575	7.05561e-05	Ccl2/Ccl3/Cx3cl1/Dab1/Dcx/Grin1/Mir221/Mir222/Ntn1/Ptprz1/Tspo	11	0.0234043
BP	GO:0002043	blood vessel endothelial cell proliferation involved in sprouting angiogenesis	9/470	48/18913	0.1875	7.54508	7.24785	2.37379e-06	0.000101152	7.09612e-05	Hmox1/Il12b/Mir101a/Mir146a/Mir222/Mir27b/Ngfr/Thbs1/Vegfa	9	0.0191489
BP	GO:0033273	response to vitamin	18/470	198/18913	0.0909091	3.65822	6.00248	2.37724e-06	0.000101152	7.09612e-05	Acp5/Ccl2/Ccl5/Cd40/Cxcl10/Cyp1a1/Il1a/Il1b/Mmp9/Nfkbiz/Nos2/Ptgs2/Rbp1/Serpina3n/Stc1/Stc2/Tspo/Vegfa	18	0.0382979
BP	GO:0002443	leukocyte mediated immunity	29/470	445/18913	0.0651685	2.62241	5.52882	2.51632e-06	0.000106097	7.44302e-05	Batf/Bcl3/C1s/C3/Ccl2/Ccl3/Cd28/Cd40/Coro1a/Cxcl1/Cxcl6/Dnase1l3/Fcgr2a/Hmox1/Il12b/Il1b/Il6/Nfkbiz/Nod2/RT1-Bb/RT1-CE1/RT1-CE16/RT1-S3/Rsad2/Slfn2/Syk/Tlr2/Tnf/Vsir	29	0.0617021
BP	GO:0042311	vasodilation	11/470	76/18913	0.144737	5.82427	6.7272	2.65307e-06	0.000110855	7.77679e-05	Abcc9/Adora2a/Adrb3/Bdkrb2/Gch1/Gucy1a1/Irag1/Kcnma1/Kcnmb1/Tnf/Vegfa	11	0.0234043
BP	GO:0007584	response to nutrient	25/470	352/18913	0.0710227	2.85798	5.61713	2.77549e-06	0.000114935	8.06301e-05	Acp5/Aldh3a1/Ass1/Ccl2/Ccl5/Cd40/Cxcl10/Cyp1a1/Hmox1/Il1a/Il1b/Mapt/Mgp/Mmp9/Nfkbiz/Nod2/Nos2/Ppargc1a/Ptgs2/Rbp1/Serpina3n/Stc1/Stc2/Tspo/Vegfa	25	0.0531915
BP	GO:0070661	leukocyte proliferation	26/470	376/18913	0.0691489	2.78258	5.57347	2.87037e-06	0.000117812	8.26483e-05	Ccl5/Cd28/Cd40/Coro1a/Csf2/Cx3cl1/Cxcr4/Il12b/Il1a/Il1b/Il34/Il6/Nfkbiz/Pla2g5/RT1-Bb/RT1-CE16/RT1-DMb/Slc11a1/Slfn2/Syk/Tnfrsf14/Tnfrsf9/Vav3/Vsir/Wnt4/Zap70	26	0.0553191
BP	GO:0045785	positive regulation of cell adhesion	31/470	499/18913	0.0621242	2.49991	5.42054	3.05671e-06	0.00012436	8.72419e-05	Ccl2/Ccl5/Cd28/Coro1a/Cx3cl1/Epb41l4b/Fcho1/Frmd5/Il12b/Il1a/Il1b/Il6/Mir27b/Nfkbiz/Plekha2/Podxl/RT1-Bb/RT1-CE16/RT1-DMb/Ret/Syk/Tgm2/Thbs1/Tnf/Tnfrsf14/Vav3/Vegfa/Vsir/Wnt10b/Wnt4/Zap70	31	0.0659574
BP	GO:0046209	nitric oxide metabolic process	13/470	109/18913	0.119266	4.79932	6.35032	3.12031e-06	0.000125843	8.82826e-05	Acp5/Ass1/Cyp1a1/Epor/Il1b/Il6/Nos2/Ptgs2/Tlr2/Tmem106a/Tnf/Tspo/Zc3h12a	13	0.0276596
BP	GO:0031650	regulation of heat generation	6/470	18/18913	0.333333	13.4135	8.4112	3.28535e-06	0.000131357	9.21507e-05	Apln/Ccl5/Il1b/Nmu/Ptgs2/Tnf	6	0.012766
BP	GO:0051924	regulation of calcium ion transport	23/470	310/18913	0.0741935	2.98558	5.62702	3.36278e-06	0.00013264	9.30509e-05	Adcyap1r1/Adora2a/Bdkrb1/Ccl2/Ccl3/Ccl4/Ccl5/Coro1a/Crhr2/Cx3cl1/Cxcl10/Cxcr4/Grin1/Hap1/Kcnn4/P2ry6/Ptgs2/Rgs4/Rgs9/Stac2/Stc1/Stc2/Tspo	23	0.0489362
BP	GO:0015908	fatty acid transport	14/470	127/18913	0.110236	4.43595	6.20203	3.37464e-06	0.00013264	9.30509e-05	Bdkrb2/Fabp4/Il1a/Il1b/Mfsd2a/Nos2/Pla2g2a/Pla2g5/Ptgs2/Rbp1/Rbp2/Slc2a1/Syk/Thbs1	14	0.0297872
BP	GO:0042098	T cell proliferation	20/470	245/18913	0.0816327	3.28493	5.74658	3.50831e-06	0.000136736	9.59237e-05	Ccl5/Cd28/Coro1a/Cxcr4/Il12b/Il1a/Il1b/Il6/Pla2g5/RT1-Bb/RT1-CE16/RT1-DMb/Slc11a1/Slfn2/Syk/Tnfrsf14/Tnfrsf9/Vsir/Wnt4/Zap70	20	0.0425532
BP	GO:0019693	ribose phosphate metabolic process	25/470	357/18913	0.070028	2.81796	5.53576	3.56536e-06	0.00013769	9.65932e-05	Abcc9/Adss1/Ak4/Aldoc/Cbfa2t3/Cda/Ddit4/Dlgap2/Eno2/Gpi/Gucy1a1/Gucy1b1/Gucy2c/Hk2/Hk3/Ier3/Myh3/Pfkp/Pgk1/Pgk1l1/Ppargc1a/Pygl/Sult2b1/Tspo/Upp1	25	0.0531915
BP	GO:0006936	muscle contraction	24/470	334/18913	0.0718563	2.89153	5.56771	3.59217e-06	0.00013769	9.65932e-05	Abcc9/Acta1/Acta2/Actg2/Bdkrb1/Bdkrb2/Cacna1h/Cxcr4/Dsc2/Gucy1a1/Irag1/Kcnma1/Myh1/Myh2/Myh3/Nmu/Npy1r/Ptgs2/Rcsd1/Sstr2/Stac2/Stc1/Tnf/Zc3h12a	24	0.0510638
BP	GO:2001057	reactive nitrogen species metabolic process	13/470	111/18913	0.117117	4.71284	6.26279	3.8314e-06	0.000145656	0.000102182	Acp5/Ass1/Cyp1a1/Epor/Il1b/Il6/Nos2/Ptgs2/Tlr2/Tmem106a/Tnf/Tspo/Zc3h12a	13	0.0276596
BP	GO:0002440	production of molecular mediator of immune response	20/470	247/18913	0.0809717	3.25833	5.70313	3.96961e-06	0.000149683	0.000105007	Acp5/Batf/Cd28/Cd40/Evpl/Gpi/Hmox1/Il17f/Il1b/Il6/Nfkbiz/Nod2/RT1-Bb/RT1-CE16/Rsad2/Syk/Tlr2/Tnf/Tnfrsf14/Vsir	20	0.0425532
BP	GO:1903531	negative regulation of secretion by cell	18/470	206/18913	0.0873786	3.51615	5.79656	4.17211e-06	0.00015547	0.000109066	Crhr2/Ffar4/Fst/Gnaz/Hmox1/Htr6/Il12b/Il1b/Il1rn/Il6/Mir146a/Npy1r/Pde1c/Rhbdf2/Rsad2/Sstr2/Stxbp5l/Tspo	18	0.0382979
BP	GO:1990874	vascular associated smooth muscle cell proliferation	13/470	112/18913	0.116071	4.67076	6.21981	4.23802e-06	0.00015547	0.000109066	Apln/Cnn1/Hmox1/Kcnn4/Mir146a/Mir221/Mir222/Mmp9/Ndrg2/P2ry6/Ppargc1a/Rgs5/Tnf	13	0.0276596
BP	GO:0006816	calcium ion transport	30/470	482/18913	0.0622407	2.50459	5.34158	4.25715e-06	0.00015547	0.000109066	Adcyap1r1/Adora2a/Bdkrb1/Cacna1h/Cacna1i/Ccl2/Ccl3/Ccl4/Ccl5/Chrna4/Coro1a/Crhr2/Cx3cl1/Cxcl10/Cxcr4/Ero1a/Grin1/Grin2c/Hap1/Kcnn4/P2rx6/P2ry6/Panx3/Ptgs2/Rgs4/Rgs9/Stac2/Stc1/Stc2/Tspo	30	0.0638298
BP	GO:0010959	regulation of metal ion transport	30/470	482/18913	0.0622407	2.50459	5.34158	4.25715e-06	0.00015547	0.000109066	Abcc9/Adcyap1r1/Adora2a/Bdkrb1/Ccl2/Ccl3/Ccl4/Ccl5/Coro1a/Crhr2/Cx3cl1/Cxcl1/Cxcl10/Cxcr4/Fgf11/Grin1/Hap1/Kcng2/Kcnmb1/Kcnn4/Lcn2/Osr1/P2ry6/Ptgs2/Rgs4/Rgs9/Stac2/Stc1/Stc2/Tspo	30	0.0638298
BP	GO:0014015	positive regulation of gliogenesis	12/470	96/18913	0.125	5.03005	6.31936	4.54901e-06	0.000164831	0.000115633	Cxcr4/Id2/Il1b/Il34/Il6/Mir221/Mir222/Ntn1/Ptprz1/Tlr2/Tnf/Tspo	12	0.0255319
BP	GO:0060353	regulation of cell adhesion molecule production	6/470	19/18913	0.315789	12.7075	8.15044	4.70116e-06	0.000169023	0.000118574	Mir101a/Mir146a/Mir221/Mir222/Mir27b/Notch4	6	0.012766
BP	GO:0050708	regulation of protein secretion	24/470	340/18913	0.0705882	2.8405	5.46684	4.87351e-06	0.000173872	0.000121976	Adora2a/Ankrd1/Ano1/Ccl5/Crhr2/Gipr/Gnaz/Gpr68/Hcar2/Il12b/Il1a/Il1b/Il6/Kcnn4/Mir146a/Mmp13/Nmu/Nos2/Pde1c/Rhbdf2/Rsad2/Stxbp5l/Tlr2/Tnf	24	0.0510638
BP	GO:0007249	canonical NF-kappaB signal transduction	23/470	318/18913	0.072327	2.91047	5.48476	5.14009e-06	0.000181983	0.000127666	Bcl3/Card10/Cd40/Coro1a/Cx3cl1/Gbp7/Hmox1/Il1a/Il1b/Mir146a/Mir27b/Nfkbia/Nod2/Tgfbr3/Tgm2/Ticam2/Tlr2/Tmem106a/Tnf/Tnfaip3/Tnfsf15/Tnip3/Zc3h12a	23	0.0489362
BP	GO:0009135	purine nucleoside diphosphate metabolic process	14/470	132/18913	0.106061	4.26792	6.01453	5.32893e-06	0.000185831	0.000130366	Ak4/Aldoc/Cbfa2t3/Ddit4/Dlgap2/Eno2/Gpi/Hk2/Hk3/Ier3/Pfkp/Pgk1/Pgk1l1/Ppargc1a	14	0.0297872
BP	GO:0009179	purine ribonucleoside diphosphate metabolic process	14/470	132/18913	0.106061	4.26792	6.01453	5.32893e-06	0.000185831	0.000130366	Ak4/Aldoc/Cbfa2t3/Ddit4/Dlgap2/Eno2/Gpi/Hk2/Hk3/Ier3/Pfkp/Pgk1/Pgk1l1/Ppargc1a	14	0.0297872
BP	GO:0051928	positive regulation of calcium ion transport	15/470	151/18913	0.0993377	3.99739	5.9033	5.58259e-06	0.000193224	0.000135552	Adcyap1r1/Bdkrb1/Ccl2/Ccl3/Ccl4/Ccl5/Cx3cl1/Cxcl10/Cxcr4/Grin1/Hap1/P2ry6/Stac2/Stc1/Tspo	15	0.0319149
BP	GO:0045471	response to ethanol	22/470	299/18913	0.0735786	2.96083	5.4558	6.26484e-06	0.000215232	0.000150991	Acp5/Adcyap1r1/Adh1c/Adh7/Car3/Ccl2/Ccl5/Ccl7/Cldn1/Csf3/Grin1/Il1b/Il6/Kcnmb1/Mmp9/Nfkbia/Ngfr/Npy1r/Rgs4/Sptbn2/Tlr2/Tnf	22	0.0468085
BP	GO:0006953	acute-phase response	9/470	54/18913	0.166667	6.70674	6.7039	6.59588e-06	0.000224939	0.000157801	Ass1/Ccl5/Il1a/Il1b/Il1rn/Il6/Lcn2/Ptgs2/Tnf	9	0.0191489
BP	GO:0009259	ribonucleotide metabolic process	24/470	350/18913	0.0685714	2.75934	5.3035	7.9614e-06	0.000269525	0.000189079	Abcc9/Adss1/Ak4/Aldoc/Cbfa2t3/Cda/Ddit4/Dlgap2/Eno2/Gpi/Gucy1a1/Gucy1b1/Gucy2c/Hk2/Hk3/Ier3/Myh3/Pfkp/Pgk1/Pgk1l1/Ppargc1a/Sult2b1/Tspo/Upp1	24	0.0510638
BP	GO:0050867	positive regulation of cell activation	25/470	376/18913	0.0664894	2.67556	5.23885	8.81359e-06	0.000296213	0.000207802	Acta2/Ccl2/Ccl5/Cd28/Cd40/Coro1a/Fcho1/Il12b/Il1a/Il1b/Il6/Kcnn4/Nfkbiz/Nod2/RT1-Bb/RT1-CE16/RT1-DMb/Syk/Thbs1/Tnf/Tnfrsf14/Vav3/Vsir/Wnt10b/Zap70	25	0.0531915
BP	GO:0048245	eosinophil chemotaxis	6/470	21/18913	0.285714	11.4973	7.68332	9.01308e-06	0.000300738	0.000210976	Ccl2/Ccl3/Ccl4/Ccl5/Ccl7/Cx3cl1	6	0.012766
BP	GO:0032760	positive regulation of tumor necrosis factor production	13/470	120/18913	0.108333	4.35938	5.89323	9.12535e-06	0.000302168	0.000211979	Ccl2/Ccl3/Ccl4/Fcgr2a/Il12b/Il1a/Il6/Mir27b/Nod2/Syk/Thbs1/Tlr2/Tmem106a	13	0.0276596
BP	GO:0002696	positive regulation of leukocyte activation	24/470	353/18913	0.0679887	2.73589	5.25561	9.18622e-06	0.000302168	0.000211979	Ccl2/Ccl5/Cd28/Cd40/Coro1a/Fcho1/Il12b/Il1a/Il1b/Il6/Kcnn4/Nfkbiz/Nod2/RT1-Bb/RT1-CE16/RT1-DMb/Syk/Thbs1/Tnf/Tnfrsf14/Vav3/Vsir/Wnt10b/Zap70	24	0.0510638
BP	GO:0010574	regulation of vascular endothelial growth factor production	9/470	57/18913	0.157895	6.35375	6.46209	1.04461e-05	0.00034119	0.000239354	C3/Ccl2/Hpse/Il1a/Il1b/Il6/Mir146a/Ndrg2/Ptgs2	9	0.0191489
BP	GO:0010460	positive regulation of heart rate	7/470	32/18913	0.21875	8.80259	7.05185	1.09938e-05	0.000356569	0.000250143	Adm/Apln/Crhr2/Gch1/Nmu/Rgs4/Slc1a1	7	0.0148936
BP	GO:0032720	negative regulation of tumor necrosis factor production	11/470	88/18913	0.125	5.03005	6.04904	1.13451e-05	0.000362189	0.000254085	Acp5/Bcl3/Cidea/Cx3cl1/Mir101a/Nod2/Thbs1/Tnfaip3/Tspo/Vsir/Zc3h12a	11	0.0234043
BP	GO:0080164	regulation of nitric oxide metabolic process	11/470	88/18913	0.125	5.03005	6.04904	1.13451e-05	0.000362189	0.000254085	Acp5/Ass1/Epor/Il1b/Il6/Ptgs2/Tlr2/Tmem106a/Tnf/Tspo/Zc3h12a	11	0.0234043
BP	GO:0009185	ribonucleoside diphosphate metabolic process	14/470	141/18913	0.0992908	3.9955	5.69936	1.14795e-05	0.000362189	0.000254085	Ak4/Aldoc/Cbfa2t3/Ddit4/Dlgap2/Eno2/Gpi/Hk2/Hk3/Ier3/Pfkp/Pgk1/Pgk1l1/Ppargc1a	14	0.0297872
BP	GO:0010595	positive regulation of endothelial cell migration	14/470	141/18913	0.0992908	3.9955	5.69936	1.14795e-05	0.000362189	0.000254085	Cd40/Fgf16/Gpi/Hmox1/Lcn2/Mir101a/Mir146a/Mir221/Mir27b/Ptgs2/Tgfbr3/Thbs1/Vegfa/Zc3h12a	14	0.0297872
BP	GO:1904705	regulation of vascular associated smooth muscle cell proliferation	12/470	105/18913	0.114286	4.59891	5.90331	1.16169e-05	0.00036405	0.000255391	Apln/Cnn1/Hmox1/Mir146a/Mir221/Mir222/Mmp9/Ndrg2/P2ry6/Ppargc1a/Rgs5/Tnf	12	0.0255319
BP	GO:0046651	lymphocyte proliferation	23/470	335/18913	0.0686567	2.76278	5.19663	1.20355e-05	0.000374636	0.000262817	Ccl5/Cd28/Cd40/Coro1a/Cxcr4/Il12b/Il1a/Il1b/Il6/Nfkbiz/Pla2g5/RT1-Bb/RT1-CE16/RT1-DMb/Slc11a1/Slfn2/Syk/Tnfrsf14/Tnfrsf9/Vav3/Vsir/Wnt4/Zap70	23	0.0489362
BP	GO:0052547	regulation of peptidase activity	25/470	384/18913	0.0651042	2.61982	5.11927	1.26362e-05	0.000386292	0.000270994	Adora2a/Aph1b/Dapk1/Egln3/Gpi/Il6/Mir27b/Mmp9/Ngfr/Psmb8/Ptgs2/Ret/Rhbdf2/Serpina3a/Serpina3n/Serpinb10/Serpinb2/Slc1a1/Slpi/Syk/Thbs1/Tnf/Tnfsf15/Vegfa/Vsir	25	0.0531915
BP	GO:0016052	carbohydrate catabolic process	17/470	202/18913	0.0841584	3.38657	5.44381	1.26378e-05	0.000386292	0.000270994	Aldoc/Cbfa2t3/Ddit4/Eno2/Gpi/Hk2/Hk3/Hsd11b1/Ier3/Khk/Pfkp/Pgk1/Pgk1l1/Ppargc1a/Ppp1r3b/Ppp1r3c/Pygl	17	0.0361702
BP	GO:1903556	negative regulation of tumor necrosis factor superfamily cytokine production	11/470	89/18913	0.123596	4.97354	5.99816	1.26598e-05	0.000386292	0.000270994	Acp5/Bcl3/Cidea/Cx3cl1/Mir101a/Nod2/Thbs1/Tnfaip3/Tspo/Vsir/Zc3h12a	11	0.0234043
BP	GO:0072526	pyridine-containing compound catabolic process	13/470	124/18913	0.104839	4.21875	5.74049	1.30645e-05	0.000396034	0.000277829	Aldoc/Cbfa2t3/Ddit4/Eno2/Gpi/Hk2/Hk3/Ier3/Pfkp/Pgk1/Pgk1l1/Ppargc1a/Qprt	13	0.0276596
BP	GO:0048246	macrophage chemotaxis	8/470	45/18913	0.177778	7.15385	6.5977	1.31686e-05	0.000396596	0.000278223	Ccl2/Ccl3/Ccl5/Cx3cl1/Cyp19a1/Il34/Mmp9/Thbs1	8	0.0170213
BP	GO:0051897	positive regulation of phosphatidylinositol 3-kinase/protein kinase B signal transduction	17/470	203/18913	0.0837438	3.36989	5.41927	1.34829e-05	0.000403444	0.000283027	Ccl3/Ccl5/Cd28/Chi3l1/Csf2/Csf3/Cx3cl1/Hpse/Il6/Ngfr/Ntrk1/Rasd2/Ret/Thbs1/Tnf/Vav3/Vegfa	17	0.0361702
BP	GO:0002703	regulation of leukocyte mediated immunity	21/470	291/18913	0.0721649	2.90395	5.22505	1.36303e-05	0.000405239	0.000284286	C3/Ccl2/Cd28/Cd40/Cxcl1/Cxcl6/Dnase1l3/Fcgr2a/Hmox1/Il12b/Il1b/Il6/Nod2/RT1-CE1/RT1-CE16/RT1-S3/Rsad2/Syk/Tlr2/Tnf/Vsir	21	0.0446809
BP	GO:0050921	positive regulation of chemotaxis	15/470	163/18913	0.0920245	3.70311	5.53297	1.41498e-05	0.000418005	0.000293242	Ccl2/Ccl3/Ccl4/Ccl5/Ccl7/Cx3cl1/Cxcl10/Cxcl14/Cxcr4/Fgf16/Il1b/Il34/Pla2g7/Thbs1/Vegfa	15	0.0319149
BP	GO:1903706	regulation of hemopoiesis	27/470	438/18913	0.0616438	2.48057	5.00469	1.52917e-05	0.000448879	0.000314901	Ccl3/Ccl5/Cd28/Cd69/Csf2/Csf3/Dtx1/Gpr68/Id2/Ikzf1/Il12b/Il34/Il6/Mir221/Mir222/Mturn/Nfkbia/Nfkbiz/Pglyrp1/Pglyrp2/Rbp1/Syk/Tnf/Vsir/Wnt10b/Zap70/Zc3h12a	27	0.0574468
BP	GO:0046031	ADP metabolic process	13/470	126/18913	0.103175	4.15179	5.66651	1.55437e-05	0.000453406	0.000318077	Ak4/Aldoc/Cbfa2t3/Ddit4/Eno2/Gpi/Hk2/Hk3/Ier3/Pfkp/Pgk1/Pgk1l1/Ppargc1a	13	0.0276596
BP	GO:0014013	regulation of gliogenesis	14/470	145/18913	0.0965517	3.88528	5.56756	1.58153e-05	0.000458445	0.000321612	Cxcr4/Dab1/Id2/Il1b/Il34/Il6/Mir146a/Mir221/Mir222/Ntn1/Ptprz1/Tlr2/Tnf/Tspo	14	0.0297872
BP	GO:0060352	cell adhesion molecule production	6/470	23/18913	0.26087	10.4975	7.27544	1.60734e-05	0.000460177	0.000322827	Mir101a/Mir146a/Mir221/Mir222/Mir27b/Notch4	6	0.012766
BP	GO:0097398	cellular response to interleukin-17	6/470	23/18913	0.26087	10.4975	7.27544	1.60734e-05	0.000460177	0.000322827	Cxcl1/Cxcl10/Il17f/Il1b/Il6/Nfkbiz	6	0.012766
BP	GO:0030098	lymphocyte differentiation	27/470	440/18913	0.0613636	2.4693	4.97817	1.65804e-05	0.000471778	0.000330965	Batf/Bcl3/Cd28/Cd69/Coro1a/Dtx1/Id2/Ikzf1/Il12b/Il1a/Il1b/Il6/Irf8/Jag2/Nfkbiz/Ntrk1/Pglyrp1/Pglyrp2/RT1-Bb/Rsad2/Syk/Tnfrsf9/Vsir/Wnt10b/Wnt4/Zap70/Zc3h12a	27	0.0574468
BP	GO:0032943	mononuclear cell proliferation	23/470	342/18913	0.0672515	2.70623	5.08317	1.6767e-05	0.000473058	0.000331863	Ccl5/Cd28/Cd40/Coro1a/Cxcr4/Il12b/Il1a/Il1b/Il6/Nfkbiz/Pla2g5/RT1-Bb/RT1-CE16/RT1-DMb/Slc11a1/Slfn2/Syk/Tnfrsf14/Tnfrsf9/Vav3/Vsir/Wnt4/Zap70	23	0.0489362
BP	GO:0002526	acute inflammatory response	13/470	127/18913	0.102362	4.1191	5.63009	1.69314e-05	0.000473058	0.000331863	Ass1/Bdkrb2/C3/Ccl5/Dnase1l3/Fcgr2a/Il1a/Il1b/Il1rn/Il6/Lcn2/Ptgs2/Tnf	13	0.0276596
BP	GO:0045639	positive regulation of myeloid cell differentiation	13/470	127/18913	0.102362	4.1191	5.63009	1.69314e-05	0.000473058	0.000331863	Ccl3/Ccl5/Csf2/Csf3/Gpr68/Id2/Ikzf1/Il12b/Il34/Mir221/Mir222/Mturn/Tnf	13	0.0276596
BP	GO:0042063	gliogenesis	27/470	441/18913	0.0612245	2.4637	4.96496	1.7261e-05	0.000479381	0.000336299	Adora2a/Ano1/Bnip3/C1s/Ccl2/Ccl3/Cx3cl1/Cxcr4/Dab1/Dcx/Dhh/Dtx1/Grin1/Id2/Il1b/Il34/Il6/Mir146a/Mir221/Mir222/Mt2A/Ndrg1/Ntn1/Ptprz1/Tlr2/Tnf/Tspo	27	0.0574468
BP	GO:0009615	response to virus	24/470	368/18913	0.0652174	2.62438	5.02341	1.82851e-05	0.000504215	0.000353721	Abcc9/Acta1/Acta2/Actg2/Bcl3/Bnip3/Cd40/Cxcl10/Ddit4/Gbp7/Il12b/Il1b/Il6/Lcn2/Mir146a/Mmp12/Oasl/Rsad2/Ticam2/Tlr2/Tnf/Trim7/Usp18/Zc3h12a	24	0.0510638
BP	GO:0046634	regulation of alpha-beta T cell activation	13/470	128/18913	0.101562	4.08692	5.59405	1.84266e-05	0.000504215	0.000353721	Adora2a/Cd28/Cd69/Il12b/Il6/Nfkbiz/RT1-Bb/RT1-CE16/Syk/Tnfrsf14/Vsir/Zap70/Zc3h12a	13	0.0276596
BP	GO:0009132	nucleoside diphosphate metabolic process	14/470	147/18913	0.0952381	3.83242	5.50342	1.84814e-05	0.000504215	0.000353721	Ak4/Aldoc/Cbfa2t3/Ddit4/Dlgap2/Eno2/Gpi/Hk2/Hk3/Ier3/Pfkp/Pgk1/Pgk1l1/Ppargc1a	14	0.0297872
BP	GO:0050870	positive regulation of T cell activation	18/470	230/18913	0.0782609	3.14925	5.23516	1.90573e-05	0.000516887	0.000362611	Ccl2/Ccl5/Cd28/Coro1a/Fcho1/Il12b/Il1a/Il1b/Il6/Nfkbiz/RT1-Bb/RT1-CE16/RT1-DMb/Syk/Tnfrsf14/Vsir/Wnt10b/Zap70	18	0.0382979
BP	GO:0060252	positive regulation of glial cell proliferation	7/470	35/18913	0.2	8.04809	6.66237	2.05935e-05	0.000555305	0.000389562	Il1b/Il6/Mir221/Mir222/Ntn1/Tnf/Tspo	7	0.0148936
BP	GO:0050920	regulation of chemotaxis	18/470	232/18913	0.0775862	3.1221	5.19173	2.14093e-05	0.000573966	0.000402653	Ccl2/Ccl3/Ccl4/Ccl5/Ccl7/Cx3cl1/Cxcl10/Cxcl14/Cxcr4/Cyp19a1/Fgf16/Il1b/Il34/Nod2/Pla2g7/Slit1/Thbs1/Vegfa	18	0.0382979
BP	GO:0002274	myeloid leukocyte activation	20/470	277/18913	0.0722022	2.90545	5.0999	2.16256e-05	0.000576435	0.000404385	Batf/Ccl3/Ccl5/Csf2/Cx3cl1/Cxcl6/Dnase1l3/Fcgr2a/Hmox1/Kcnn4/Ndrg1/Pla2g2a/Pla2g5/Ptpre/Slc11a1/Syk/Thbs1/Tlr2/Tmem106a/Tnf	20	0.0425532
BP	GO:0002700	regulation of production of molecular mediator of immune response	17/470	211/18913	0.0805687	3.24212	5.22827	2.22779e-05	0.000590429	0.000414202	Acp5/Cd28/Cd40/Evpl/Gpi/Hmox1/Il17f/Il1b/Il6/Nod2/RT1-CE16/Rsad2/Syk/Tlr2/Tnf/Tnfrsf14/Vsir	17	0.0361702
BP	GO:0072006	nephron development	16/470	190/18913	0.0842105	3.38867	5.28259	2.2475e-05	0.000590763	0.000414436	Acta1/Acta2/Actg2/Anpep/Dchs2/Enpep/Hey1/Heyl/Mtss1/Osr1/Podxl/Prom1/Ret/Slc2a5/Vegfa/Wnt4	16	0.0340426
BP	GO:0090049	regulation of cell migration involved in sprouting angiogenesis	10/470	78/18913	0.128205	5.15903	5.87568	2.26541e-05	0.000590763	0.000414436	Card10/Hmox1/Mir101a/Mir146a/Mir221/Mir27b/Ptgs2/Tgfbr3/Thbs1/Vegfa	10	0.0212766
BP	GO:1904238	pericyte cell differentiation	5/470	15/18913	0.333333	13.4135	7.67773	2.26726e-05	0.000590763	0.000414436	Acta1/Acta2/Actg2/Osr1/Wnt4	5	0.0106383
BP	GO:0032609	type II interferon production	13/470	131/18913	0.0992366	3.99332	5.48808	2.36294e-05	0.00060885	0.000427125	Bcl3/Il12b/Il1b/Irf8/Nod2/Pglyrp1/Pglyrp2/RT1-CE16/Slc11a1/Ticam2/Tnf/Vsir/Zc3h12a	13	0.0276596
BP	GO:0032649	regulation of type II interferon production	13/470	131/18913	0.0992366	3.99332	5.48808	2.36294e-05	0.00060885	0.000427125	Bcl3/Il12b/Il1b/Irf8/Nod2/Pglyrp1/Pglyrp2/RT1-CE16/Slc11a1/Ticam2/Tnf/Vsir/Zc3h12a	13	0.0276596
BP	GO:0050863	regulation of T cell activation	24/470	374/18913	0.0641711	2.58227	4.93374	2.37921e-05	0.000609656	0.000427691	Adora2a/Ccl2/Ccl5/Cd28/Cd69/Coro1a/Dtx1/Fcho1/Il12b/Il1a/Il1b/Il6/Nfkbiz/Pla2g5/RT1-Bb/RT1-CE16/RT1-DMb/Syk/Tnfrsf14/Tnfrsf9/Vsir/Wnt10b/Zap70/Zc3h12a	24	0.0510638
BP	GO:0032611	interleukin-1 beta production	12/470	113/18913	0.106195	4.27332	5.57122	2.45929e-05	0.00062329	0.000437255	Acp5/Ccl3/Ffar4/Il6/Mir101a/Mir27b/Nod2/Tlr2/Tmem106a/Tnf/Tnfaip3/Zc3h12a	12	0.0255319
BP	GO:0032651	regulation of interleukin-1 beta production	12/470	113/18913	0.106195	4.27332	5.57122	2.45929e-05	0.00062329	0.000437255	Acp5/Ccl3/Ffar4/Il6/Mir101a/Mir27b/Nod2/Tlr2/Tmem106a/Tnf/Tnfaip3/Zc3h12a	12	0.0255319
BP	GO:0002675	positive regulation of acute inflammatory response	7/470	36/18913	0.194444	7.82453	6.54273	2.50214e-05	0.000630703	0.000442455	C3/Ccl5/Fcgr2a/Il1b/Il6/Ptgs2/Tnf	7	0.0148936
BP	GO:0043281	regulation of cysteine-type endopeptidase activity involved in apoptotic process	16/470	192/18913	0.0833333	3.35337	5.23212	2.5574e-05	0.000641148	0.000449783	Adora2a/Dapk1/Egln3/Gpi/Il6/Mir27b/Mmp9/Ngfr/Ptgs2/Ret/Slc1a1/Syk/Thbs1/Tnf/Tnfsf15/Vegfa	16	0.0340426
BP	GO:0032637	interleukin-8 production	11/470	96/18913	0.114583	4.61088	5.66207	2.61592e-05	0.000648804	0.000455154	Bcl3/Chi3l1/Il17f/Il1b/Il6/Mir146a/Nod2/Nos2/Syk/Tlr2/Tnf	11	0.0234043
BP	GO:0032677	regulation of interleukin-8 production	11/470	96/18913	0.114583	4.61088	5.66207	2.61592e-05	0.000648804	0.000455154	Bcl3/Chi3l1/Il17f/Il1b/Il6/Mir146a/Nod2/Nos2/Syk/Tlr2/Tnf	11	0.0234043
BP	GO:1903039	positive regulation of leukocyte cell-cell adhesion	19/470	258/18913	0.0736434	2.96344	5.06912	2.63518e-05	0.000650104	0.000456066	Ccl2/Ccl5/Cd28/Coro1a/Fcho1/Il12b/Il1a/Il1b/Il6/Nfkbiz/RT1-Bb/RT1-CE16/RT1-DMb/Syk/Tnf/Tnfrsf14/Vsir/Wnt10b/Zap70	19	0.0404255
BP	GO:0009150	purine ribonucleotide metabolic process	22/470	328/18913	0.0670732	2.69905	4.95524	2.65662e-05	0.000651925	0.000457343	Abcc9/Adss1/Ak4/Aldoc/Cbfa2t3/Ddit4/Dlgap2/Eno2/Gpi/Gucy1a1/Gucy1b1/Gucy2c/Hk2/Hk3/Ier3/Myh3/Pfkp/Pgk1/Pgk1l1/Ppargc1a/Sult2b1/Tspo	22	0.0468085
BP	GO:0072677	eosinophil migration	6/470	25/18913	0.24	9.6577	6.91483	2.70336e-05	0.000659905	0.000462942	Ccl2/Ccl3/Ccl4/Ccl5/Ccl7/Cx3cl1	6	0.012766
BP	GO:0015718	monocarboxylic acid transport	16/470	193/18913	0.0829016	3.33599	5.20714	2.7261e-05	0.000661972	0.000464391	Bdkrb2/Fabp4/Il1a/Il1b/Mfsd2a/Nos2/Pla2g2a/Pla2g5/Ptgs2/Rbp1/Rbp2/Slc16a3/Slc2a1/Syk/Thbs1/Tnf	16	0.0340426
BP	GO:0043270	positive regulation of monoatomic ion transport	20/470	282/18913	0.070922	2.85393	5.00728	2.79478e-05	0.000675113	0.00047361	Adcyap1r1/Bdkrb1/Ccl2/Ccl3/Ccl4/Ccl5/Crhr2/Cx3cl1/Cxcl1/Cxcl10/Cxcr4/Grin1/Hap1/Kcnmb1/Lcn2/P2ry6/Rgs9/Stac2/Stc1/Tspo	20	0.0425532
BP	GO:0032755	positive regulation of interleukin-6 production	12/470	115/18913	0.104348	4.199	5.493	2.93461e-05	0.000705219	0.00049473	Crhr2/Il17f/Il1a/Il1b/Il6/Nod2/Nos2/Syk/Ticam2/Tlr2/Tmem106a/Tnf	12	0.0255319
BP	GO:0090050	positive regulation of cell migration involved in sprouting angiogenesis	7/470	37/18913	0.189189	7.61305	6.42761	3.02046e-05	0.000722108	0.000506579	Hmox1/Mir101a/Mir146a/Mir27b/Ptgs2/Tgfbr3/Vegfa	7	0.0148936
BP	GO:0070665	positive regulation of leukocyte proliferation	15/470	174/18913	0.0862069	3.469	5.22306	3.06856e-05	0.000729844	0.000512006	Ccl5/Cd28/Cd40/Coro1a/Csf2/Il12b/Il1a/Il1b/Il34/Il6/RT1-CE16/RT1-DMb/Syk/Vav3/Zap70	15	0.0319149
BP	GO:0006096	glycolytic process	12/470	116/18913	0.103448	4.1628	5.45455	3.20084e-05	0.000757424	0.000531354	Aldoc/Cbfa2t3/Ddit4/Eno2/Gpi/Hk2/Hk3/Ier3/Pfkp/Pgk1/Pgk1l1/Ppargc1a	12	0.0255319
BP	GO:1903977	positive regulation of glial cell migration	5/470	16/18913	0.3125	12.5751	7.3942	3.23064e-05	0.000760593	0.000533577	Cx3cl1/Grin1/Mir221/Mir222/Ptprz1	5	0.0106383
BP	GO:0045444	fat cell differentiation	20/470	285/18913	0.0701754	2.82389	4.95267	3.24913e-05	0.000761084	0.000533921	Adrb3/Angptl8/Bnip3/C1ql4/Ccdc3/Cebpd/Ero1a/Fabp4/Ffar4/Frzb/Id2/Lamb3/Mir27b/Psmb8/Ptgs2/Steap4/Tnf/Vegfa/Wnt10b/Zc3h12a	20	0.0425532
BP	GO:0032635	interleukin-6 production	16/470	196/18913	0.0816327	3.28493	5.13316	3.29284e-05	0.000763609	0.000535693	Crhr2/Il17f/Il1a/Il1b/Il6/Mir101a/Mir146a/Nod2/Nos2/Syk/Ticam2/Tlr2/Tmem106a/Tnf/Tnfaip3/Zc3h12a	16	0.0340426
BP	GO:0032675	regulation of interleukin-6 production	16/470	196/18913	0.0816327	3.28493	5.13316	3.29284e-05	0.000763609	0.000535693	Crhr2/Il17f/Il1a/Il1b/Il6/Mir101a/Mir146a/Nod2/Nos2/Syk/Ticam2/Tlr2/Tmem106a/Tnf/Tnfaip3/Zc3h12a	16	0.0340426
BP	GO:0007162	negative regulation of cell adhesion	22/470	333/18913	0.0660661	2.65853	4.87443	3.34217e-05	0.000771194	0.000541014	Acp5/Adora2a/Ass1/Cd69/Dab1/Dtx1/Il1rn/Mir146a/Mir221/Mir222/Mmp12/Notch4/Pla2g5/Plet1/Podxl/Ptprz1/RT1-Bb/Thbs1/Tnfrsf14/Vegfa/Vsir/Zc3h12a	22	0.0468085
BP	GO:0097396	response to interleukin-17	6/470	26/18913	0.230769	9.28625	6.7494	3.44104e-05	0.000790075	0.000554259	Cxcl1/Cxcl10/Il17f/Il1b/Il6/Nfkbiz	6	0.012766
BP	GO:0006809	nitric oxide biosynthetic process	11/470	99/18913	0.111111	4.47116	5.52781	3.49761e-05	0.000799109	0.000560597	Acp5/Ass1/Epor/Il1b/Il6/Nos2/Ptgs2/Tlr2/Tnf/Tspo/Zc3h12a	11	0.0234043
BP	GO:0070663	regulation of leukocyte proliferation	20/470	287/18913	0.0696864	2.80421	4.91666	3.58764e-05	0.00081566	0.000572208	Ccl5/Cd28/Cd40/Coro1a/Csf2/Il12b/Il1a/Il1b/Il34/Il6/Pla2g5/RT1-Bb/RT1-CE16/RT1-DMb/Syk/Tnfrsf14/Tnfrsf9/Vav3/Vsir/Zap70	20	0.0425532
BP	GO:1901136	carbohydrate derivative catabolic process	19/470	265/18913	0.0716981	2.88516	4.93353	3.80568e-05	0.000861011	0.000604023	Aldoc/Cbfa2t3/Cda/Chi3l1/Ddit4/Eno2/Gpi/Hk2/Hk3/Hpse/Ier3/Mmp12/Pfkp/Pgk1/Pgk1l1/Pglyrp1/Pglyrp2/Ppargc1a/Upp1	19	0.0404255
BP	GO:0042742	defense response to bacterium	22/470	336/18913	0.0654762	2.63479	4.82665	3.826e-05	0.000861407	0.000604301	Acp5/Bcl3/Cxcl6/Evpl/Gbp7/Il12b/Il17f/Il1b/Irf8/Lcn2/Nfkbiz/Nod2/Nos2/Pglyrp1/Pglyrp2/Pla2g2a/Slc11a1/Slpi/Syk/Tlr2/Tnf/Tnfrsf14	22	0.0468085
BP	GO:0009306	protein secretion	26/470	436/18913	0.059633	2.39966	4.7201	3.85381e-05	0.000863477	0.000605753	Adora2a/Ankrd1/Ano1/Ccl5/Clstn3/Crhr2/Gipr/Gnaz/Gpr68/Hcar2/Il12b/Il1a/Il1b/Il1rn/Il6/Kcnn4/Mir146a/Mmp13/Nmu/Nos2/Pde1c/Rhbdf2/Rsad2/Stxbp5l/Tlr2/Tnf	26	0.0553191
BP	GO:0032835	glomerulus development	10/470	83/18913	0.120482	4.84824	5.60891	3.92072e-05	0.000874245	0.000613307	Acta1/Acta2/Actg2/Enpep/Heyl/Mtss1/Osr1/Podxl/Prom1/Ret	10	0.0212766
BP	GO:0002705	positive regulation of leukocyte mediated immunity	15/470	178/18913	0.0842697	3.39105	5.1165	3.99925e-05	0.000883149	0.000619553	C3/Ccl2/Cd28/Cd40/Cxcl1/Fcgr2a/Il12b/Il1b/Il6/Nod2/RT1-CE1/RT1-CE16/RT1-S3/Rsad2/Tnf	15	0.0319149
BP	GO:0060759	regulation of response to cytokine stimulus	15/470	178/18913	0.0842697	3.39105	5.1165	3.99925e-05	0.000883149	0.000619553	Ccdc3/Ccl5/Cd40/Cxcr4/Il1rn/Il6/Mir101a/Mir146a/Mir27b/Mmp12/Otop1/Syk/Ticam2/Tlr2/Usp18	15	0.0319149
BP	GO:0022409	positive regulation of cell-cell adhesion	21/470	313/18913	0.0670927	2.69984	4.84089	4.01778e-05	0.000883149	0.000619553	Ccl2/Ccl5/Cd28/Coro1a/Cx3cl1/Fcho1/Il12b/Il1a/Il1b/Il6/Nfkbiz/Podxl/RT1-Bb/RT1-CE16/RT1-DMb/Syk/Tnf/Tnfrsf14/Vsir/Wnt10b/Zap70	21	0.0446809
BP	GO:0042129	regulation of T cell proliferation	16/470	200/18913	0.08	3.21923	5.03673	4.20939e-05	0.000920904	0.00064604	Ccl5/Cd28/Coro1a/Il12b/Il1a/Il1b/Il6/Pla2g5/RT1-Bb/RT1-CE16/RT1-DMb/Syk/Tnfrsf14/Tnfrsf9/Vsir/Zap70	16	0.0340426
BP	GO:0042573	retinoic acid metabolic process	6/470	27/18913	0.222222	8.94232	6.59266	4.33191e-05	0.000943257	0.000661721	Adh1c/Adh6/Adh7/Cyp1a1/Cyp2c11/Rbp1	6	0.012766
BP	GO:0043536	positive regulation of blood vessel endothelial cell migration	10/470	84/18913	0.119048	4.79053	5.55811	4.35328e-05	0.000943482	0.000661878	Cd40/Hmox1/Mir101a/Mir146a/Mir221/Mir27b/Ptgs2/Tgfbr3/Thbs1/Vegfa	10	0.0212766
BP	GO:0051251	positive regulation of lymphocyte activation	21/470	315/18913	0.0666667	2.6827	4.80761	4.40735e-05	0.000946782	0.000664193	Ccl2/Ccl5/Cd28/Cd40/Coro1a/Fcho1/Il12b/Il1a/Il1b/Il6/Nfkbiz/Nod2/RT1-Bb/RT1-CE16/RT1-DMb/Syk/Tnfrsf14/Vav3/Vsir/Wnt10b/Zap70	21	0.0446809
BP	GO:0014074	response to purine-containing compound	18/470	245/18913	0.0734694	2.95644	4.92042	4.40933e-05	0.000946782	0.000664193	Abcc9/Adora2a/Aldh3a1/Ass1/Atp7b/C1s/Ccl2/Fosl1/Il1b/Il6/P2rx6/P2ry6/Pla2g5/Ppargc1a/Ptgs2/Serpina3n/Stc1/Wnt10b	18	0.0382979
BP	GO:0015711	organic anion transport	28/470	492/18913	0.0569106	2.29011	4.62864	4.47623e-05	0.000950894	0.000667078	Adora2a/Bdkrb2/Fabp4/Grm1/Htr6/Il1a/Il1b/Il1rn/Mfsd2a/Nos2/Pla2g2a/Pla2g5/Ptgs2/Rbp1/Rbp2/Rgs4/Slc11a1/Slc16a3/Slc1a1/Slc1a2/Slc1a6/Slc26a9/Slc2a1/Slc2a3/Slc6a7/Syk/Thbs1/Tnf	28	0.0595745
BP	GO:0046032	ADP catabolic process	12/470	120/18913	0.1	4.02404	5.30496	4.48672e-05	0.000950894	0.000667078	Aldoc/Cbfa2t3/Ddit4/Eno2/Gpi/Hk2/Hk3/Ier3/Pfkp/Pgk1/Pgk1l1/Ppargc1a	12	0.0255319
BP	GO:0035592	establishment of protein localization to extracellular region	26/470	440/18913	0.0590909	2.37784	4.66831	4.48999e-05	0.000950894	0.000667078	Adora2a/Ankrd1/Ano1/Ccl5/Clstn3/Crhr2/Gipr/Gnaz/Gpr68/Hcar2/Il12b/Il1a/Il1b/Il1rn/Il6/Kcnn4/Mir146a/Mmp13/Nmu/Nos2/Pde1c/Rhbdf2/Rsad2/Stxbp5l/Tlr2/Tnf	26	0.0553191
BP	GO:0035850	epithelial cell differentiation involved in kidney development	8/470	53/18913	0.150943	6.07403	5.90502	4.5505e-05	0.000959327	0.000672994	Acta1/Acta2/Actg2/Mmp9/Mtss1/Osr1/Podxl/Prom1	8	0.0170213
BP	GO:1901654	response to ketone	27/470	467/18913	0.0578158	2.32653	4.6337	4.6747e-05	0.000981052	0.000688235	Adh1c/Ass1/C3/Car9/Ccl2/Ccl5/Cda/Cldn1/Cyp19a1/Cyp1a1/Ddit4/Fosl1/Gpi/Il1b/Il6/Mir221/Mir222/Mir27b/Nos2/P2ry6/Ppargc1a/RT1-Bb/Tgfbr3/Thbs1/Tlr2/Tspo/Vegfa	27	0.0574468
BP	GO:0045428	regulation of nitric oxide biosynthetic process	10/470	85/18913	0.117647	4.73417	5.50812	4.82591e-05	0.00100822	0.000707296	Acp5/Ass1/Epor/Il1b/Il6/Ptgs2/Tlr2/Tnf/Tspo/Zc3h12a	10	0.0212766
BP	GO:0019364	pyridine nucleotide catabolic process	12/470	121/18913	0.0991736	3.99079	5.26858	4.87062e-05	0.001013	0.000710648	Aldoc/Cbfa2t3/Ddit4/Eno2/Gpi/Hk2/Hk3/Ier3/Pfkp/Pgk1/Pgk1l1/Ppargc1a	12	0.0255319
BP	GO:0045776	negative regulation of blood pressure	9/470	69/18913	0.130435	5.24875	5.64418	5.05658e-05	0.00104698	0.000734487	Abcc9/Adrb3/Apln/Bdkrb1/Bdkrb2/Gch1/Ier3/Nos2/Tnf	9	0.0191489
BP	GO:0032309	icosanoid secretion	8/470	54/18913	0.148148	5.96154	5.82849	5.22718e-05	0.0010775	0.000755892	Bdkrb2/Il1a/Il1b/Nos2/Pla2g2a/Pla2g5/Ptgs2/Syk	8	0.0170213
BP	GO:0043122	regulation of canonical NF-kappaB signal transduction	20/470	295/18913	0.0677966	2.72816	4.77564	5.27885e-05	0.00108333	0.000759987	Card10/Cd40/Coro1a/Cx3cl1/Gbp7/Hmox1/Il1a/Il1b/Mir146a/Nfkbia/Nod2/Tgfbr3/Tgm2/Ticam2/Tmem106a/Tnf/Tnfaip3/Tnfsf15/Tnip3/Zc3h12a	20	0.0425532
BP	GO:1903975	regulation of glial cell migration	6/470	28/18913	0.214286	8.62295	6.44385	5.39838e-05	0.00110298	0.000773773	Cx3cl1/Grin1/Mir221/Mir222/Ntn1/Ptprz1	6	0.012766
BP	GO:0071692	protein localization to extracellular region	26/470	446/18913	0.058296	2.34585	4.59165	5.62257e-05	0.00114375	0.000802371	Adora2a/Ankrd1/Ano1/Ccl5/Clstn3/Crhr2/Gipr/Gnaz/Gpr68/Hcar2/Il12b/Il1a/Il1b/Il1rn/Il6/Kcnn4/Mir146a/Mmp13/Nmu/Nos2/Pde1c/Rhbdf2/Rsad2/Stxbp5l/Tlr2/Tnf	26	0.0553191
BP	GO:0046631	alpha-beta T cell activation	16/470	205/18913	0.0780488	3.14072	4.91954	5.66678e-05	0.00114771	0.000805149	Adora2a/Batf/Bcl3/Cd28/Cd69/Il12b/Il6/Nfkbiz/RT1-Bb/RT1-CE16/Rsad2/Syk/Tnfrsf14/Vsir/Zap70/Zc3h12a	16	0.0340426
BP	GO:0009137	purine nucleoside diphosphate catabolic process	12/470	123/18913	0.097561	3.9259	5.19697	5.7244e-05	0.00114934	0.000806294	Aldoc/Cbfa2t3/Ddit4/Eno2/Gpi/Hk2/Hk3/Ier3/Pfkp/Pgk1/Pgk1l1/Ppargc1a	12	0.0255319
BP	GO:0009181	purine ribonucleoside diphosphate catabolic process	12/470	123/18913	0.097561	3.9259	5.19697	5.7244e-05	0.00114934	0.000806294	Aldoc/Cbfa2t3/Ddit4/Eno2/Gpi/Hk2/Hk3/Ier3/Pfkp/Pgk1/Pgk1l1/Ppargc1a	12	0.0255319
BP	GO:0003012	muscle system process	27/470	474/18913	0.056962	2.29218	4.54825	6.01861e-05	0.00119987	0.000841739	Abcc9/Acta1/Acta2/Actg2/Bdkrb1/Bdkrb2/Cacna1h/Cxcr4/Dsc2/Gucy1a1/Irag1/Kcnma1/Kcnn4/Myh1/Myh2/Myh3/Nmu/Npy1r/Ppargc1a/Ptgs2/Rcsd1/Rgs4/Sstr2/Stac2/Stc1/Tnf/Zc3h12a	27	0.0574468
BP	GO:0002366	leukocyte activation involved in immune response	21/470	322/18913	0.0652174	2.62438	4.69315	6.05066e-05	0.00119987	0.000841739	Batf/Bcl3/Ccl3/Cd28/Cd40/Cd69/Coro1a/Dnase1l3/Hmox1/Il12b/Il6/Irf8/Nfkbiz/Pglyrp1/Pglyrp2/RT1-DMb/Slc11a1/Slfn2/Syk/Tnf/Zc3h12a	21	0.0446809
BP	GO:0030431	sleep	7/470	41/18913	0.170732	6.87032	6.00684	6.05366e-05	0.00119987	0.000841739	Adora2a/Cacna1i/Csf2/Il6/Kcna2/Nmu/Pglyrp1	7	0.0148936
BP	GO:0098712	L-glutamate import across plasma membrane	5/470	18/18913	0.277778	11.1779	6.8964	6.08159e-05	0.00120027	0.000842025	Grm1/Slc1a1/Slc1a2/Slc1a6/Tnf	5	0.0106383
BP	GO:0019882	antigen processing and presentation	12/470	124/18913	0.0967742	3.89423	5.16172	6.19775e-05	0.00121802	0.000854472	Fcgr2a/Nod2/Psmb8/RT1-Bb/RT1-CE1/RT1-CE14/RT1-CE16/RT1-CE2/RT1-DMb/RT1-S3/Slc11a1/Thbs1	12	0.0255319
BP	GO:0032613	interleukin-10 production	9/470	71/18913	0.126761	5.1009	5.52645	6.36e-05	0.0012394	0.000869472	Bcl3/Cd28/Il12b/Il6/Nod2/Syk/Thbs1/Tlr2/Vsir	9	0.0191489
BP	GO:0032653	regulation of interleukin-10 production	9/470	71/18913	0.126761	5.1009	5.52645	6.36e-05	0.0012394	0.000869472	Bcl3/Cd28/Il12b/Il6/Nod2/Syk/Thbs1/Tlr2/Vsir	9	0.0191489
BP	GO:0030217	T cell differentiation	21/470	324/18913	0.0648148	2.60818	4.66101	6.61112e-05	0.00128294	0.000900021	Batf/Bcl3/Cd28/Cd69/Coro1a/Dtx1/Ikzf1/Il12b/Il1a/Il1b/Il6/Jag2/Nfkbiz/Rsad2/Syk/Tnfrsf9/Vsir/Wnt10b/Wnt4/Zap70/Zc3h12a	21	0.0446809
BP	GO:0001959	regulation of cytokine-mediated signaling pathway	14/470	165/18913	0.0848485	3.41434	4.97238	6.66984e-05	0.00128895	0.000904232	Ccdc3/Ccl5/Cd40/Cxcr4/Il1rn/Il6/Mir101a/Mir146a/Mir27b/Mmp12/Otop1/Syk/Ticam2/Usp18	14	0.0297872
BP	GO:0009191	ribonucleoside diphosphate catabolic process	12/470	125/18913	0.096	3.86308	5.12685	6.70452e-05	0.00129027	0.000905162	Aldoc/Cbfa2t3/Ddit4/Eno2/Gpi/Hk2/Hk3/Ier3/Pfkp/Pgk1/Pgk1l1/Ppargc1a	12	0.0255319
BP	GO:1902105	regulation of leukocyte differentiation	22/470	350/18913	0.0628571	2.5294	4.61033	7.01922e-05	0.00133447	0.000936164	Ccl3/Ccl5/Cd28/Cd69/Csf2/Dtx1/Gpr68/Id2/Ikzf1/Il12b/Il34/Il6/Nfkbiz/Pglyrp1/Pglyrp2/Rbp1/Syk/Tnf/Vsir/Wnt10b/Zap70/Zc3h12a	22	0.0468085
BP	GO:0031622	positive regulation of fever generation	4/470	10/18913	0.4	16.0962	7.6226	7.02047e-05	0.00133447	0.000936164	Ccl5/Il1b/Ptgs2/Tnf	4	0.00851064
BP	GO:0072007	mesangial cell differentiation	4/470	10/18913	0.4	16.0962	7.6226	7.02047e-05	0.00133447	0.000936164	Acta1/Acta2/Actg2/Osr1	4	0.00851064
BP	GO:0002263	cell activation involved in immune response	21/470	326/18913	0.0644172	2.59217	4.6291	7.21736e-05	0.00136629	0.00095849	Batf/Bcl3/Ccl3/Cd28/Cd40/Cd69/Coro1a/Dnase1l3/Hmox1/Il12b/Il6/Irf8/Nfkbiz/Pglyrp1/Pglyrp2/RT1-DMb/Slc11a1/Slfn2/Syk/Tnf/Zc3h12a	21	0.0446809
BP	GO:0034284	response to monosaccharide	22/470	352/18913	0.0625	2.51503	4.58029	7.63105e-05	0.00143873	0.00100931	Acp5/Ano1/Ccl2/Crhr2/Cyp19a1/Gipr/Gpr68/Il1a/Il1b/Khk/Lcn2/Mir146a/Mir221/Mir222/Nos2/Pde1c/Ppargc1a/Ptgs2/Slc2a3/Slc2a5/Thbs1/Tnf	22	0.0468085
BP	GO:0002673	regulation of acute inflammatory response	8/470	57/18913	0.140351	5.64778	5.60996	7.77841e-05	0.00145394	0.00101998	C3/Ccl5/Dnase1l3/Fcgr2a/Il1b/Il6/Ptgs2/Tnf	8	0.0170213
BP	GO:0046456	icosanoid biosynthetic process	8/470	57/18913	0.140351	5.64778	5.60996	7.77841e-05	0.00145394	0.00101998	Akr1c15/Bdkrb1/Cyp2c11/Il1b/Pla2g2a/Pla2g5/Ptgs2/Syk	8	0.0170213
BP	GO:0006939	smooth muscle contraction	12/470	127/18913	0.0944882	3.80224	5.05816	7.82614e-05	0.00145394	0.00101998	Acta1/Acta2/Actg2/Bdkrb1/Bdkrb2/Gucy1a1/Irag1/Kcnma1/Nmu/Npy1r/Ptgs2/Sstr2	12	0.0255319
BP	GO:0046888	negative regulation of hormone secretion	11/470	108/18913	0.101852	4.09856	5.1551	7.83713e-05	0.00145394	0.00101998	Crhr2/Ffar4/Fst/Gnaz/Il1b/Il6/Npy1r/Pde1c/Sstr2/Stxbp5l/Tspo	11	0.0234043
BP	GO:0014009	glial cell proliferation	10/470	90/18913	0.111111	4.47116	5.2693	7.9004e-05	0.00145984	0.00102412	Cx3cl1/Il1b/Il34/Il6/Mir146a/Mir221/Mir222/Ntn1/Tnf/Tspo	10	0.0212766
BP	GO:0048002	antigen processing and presentation of peptide antigen	9/470	73/18913	0.123288	4.96115	5.41307	7.93536e-05	0.00146048	0.00102457	Fcgr2a/RT1-Bb/RT1-CE1/RT1-CE14/RT1-CE16/RT1-CE2/RT1-DMb/RT1-S3/Slc11a1	9	0.0191489
BP	GO:0001101	response to acid chemical	20/470	304/18913	0.0657895	2.6474	4.62248	8.0007e-05	0.00146669	0.00102892	Ass1/Ccl2/Ccl5/Cyp19a1/Epor/Gria2/Grin1/Il6/Lcn2/Mir101a/Mir221/Mir222/Mmp3/Ntrk1/Ppargc1a/Ptgs2/Rragd/Slc1a2/Tnf/Vegfa	20	0.0425532
BP	GO:0051090	regulation of DNA-binding transcription factor activity	24/470	404/18913	0.0594059	2.39052	4.51002	8.07529e-05	0.00147064	0.0010317	Bcl3/Bhlhe40/Coro1a/Crhr2/Egln1/Fosl1/Heyl/Hmox1/Id2/Il1b/Il6/Mir101a/Mturn/Nfkbia/Nod2/Ntrk1/Ppargc1a/Syk/Tgfbr3/Tlr2/Tnf/Tnfaip3/Wnt10b/Zc3h12a	24	0.0510638
BP	GO:0140131	positive regulation of lymphocyte chemotaxis	5/470	19/18913	0.263158	10.5896	6.676	8.08569e-05	0.00147064	0.0010317	Ccl3/Ccl4/Ccl5/Ccl7/Cxcl14	5	0.0106383
BP	GO:0010575	positive regulation of vascular endothelial growth factor production	6/470	30/18913	0.2	8.04809	6.16734	8.15747e-05	0.0014779	0.00103679	C3/Hpse/Il1a/Il1b/Il6/Ptgs2	6	0.012766
BP	GO:0051968	positive regulation of synaptic transmission, glutamatergic	7/470	43/18913	0.162791	6.55077	5.81705	8.31311e-05	0.00150024	0.00105246	Adora2a/Ccl2/Grin1/Grin2c/Ngfr/Ntrk1/Ptgs2	7	0.0148936
BP	GO:0009134	nucleoside diphosphate catabolic process	12/470	128/18913	0.09375	3.77254	5.02434	8.44512e-05	0.00151816	0.00106503	Aldoc/Cbfa2t3/Ddit4/Eno2/Gpi/Hk2/Hk3/Ier3/Pfkp/Pgk1/Pgk1l1/Ppargc1a	12	0.0255319
BP	GO:0072678	T cell migration	9/470	74/18913	0.121622	4.89411	5.35792	8.83844e-05	0.00158273	0.00111033	Ccl2/Ccl20/Ccl3/Ccl5/Cd69/Coro1a/Cxcl10/Cxcl16/Tnfrsf14	9	0.0191489
BP	GO:0006090	pyruvate metabolic process	13/470	149/18913	0.0872483	3.51091	4.91206	9.08218e-05	0.00161811	0.00113515	Aldoc/Cbfa2t3/Ddit4/Eno2/Gpi/Hk2/Hk3/Ier3/Pfkp/Pgk1/Pgk1l1/Ppargc1a/Slc16a3	13	0.0276596
BP	GO:0038061	non-canonical NF-kappaB signal transduction	12/470	129/18913	0.0930233	3.7433	4.99086	9.10579e-05	0.00161811	0.00113515	Bcl3/Birc3/Card10/Chi3l1/Il1b/Mir27b/Nfkbia/Nod2/Tlr2/Tnf/Tnfsf15/Zc3h12a	12	0.0255319
BP	GO:2000116	regulation of cysteine-type endopeptidase activity	16/470	214/18913	0.0747664	3.00863	4.71737	9.43411e-05	0.00167005	0.00117159	Adora2a/Dapk1/Egln3/Gpi/Il6/Mir27b/Mmp9/Ngfr/Ptgs2/Ret/Slc1a1/Syk/Thbs1/Tnf/Tnfsf15/Vegfa	16	0.0340426
BP	GO:0042060	wound healing	24/470	409/18913	0.0586797	2.3613	4.44307	9.75989e-05	0.00172115	0.00120744	Ccl2/Cldn1/Cx3cl1/Cxcr4/Epb41l4b/Evpl/Hmox1/Hpse/Il1a/Il6/Jag2/Mir221/Mir222/Mmp12/Myh2/Nbeal2/Pdia2/Plet1/Slc11a1/Syk/Thbs1/Tnf/Vegfa/Wnt4	24	0.0510638
BP	GO:0032891	negative regulation of organic acid transport	6/470	31/18913	0.193548	7.78847	6.03852	9.90465e-05	0.00173745	0.00121887	Htr6/Il1b/Il1rn/Rgs4/Thbs1/Tnf	6	0.012766
BP	GO:0050670	regulation of lymphocyte proliferation	18/470	261/18913	0.0689655	2.7752	4.61007	9.96416e-05	0.00173745	0.00121887	Ccl5/Cd28/Cd40/Coro1a/Il12b/Il1a/Il1b/Il6/Pla2g5/RT1-Bb/RT1-CE16/RT1-DMb/Syk/Tnfrsf14/Tnfrsf9/Vav3/Vsir/Zap70	18	0.0382979
BP	GO:0098739	import across plasma membrane	16/470	215/18913	0.0744186	2.99464	4.69556	9.96468e-05	0.00173745	0.00121887	Abcc9/Grm1/Kcnj16/Kcnj4/Kcnn4/Lcn2/Rgs4/Slc1a1/Slc1a2/Slc1a6/Slc2a1/Slc2a3/Slc2a5/Slc6a7/Thbs1/Tnf	16	0.0340426
BP	GO:0046034	ATP metabolic process	16/470	216/18913	0.0740741	2.98077	4.67388	0.000105212	0.00182761	0.00128212	Abcc9/Ak4/Aldoc/Cbfa2t3/Ddit4/Eno2/Gpi/Hk2/Hk3/Ier3/Myh3/Pfkp/Pgk1/Pgk1l1/Ppargc1a/Tspo	16	0.0340426
BP	GO:0002449	lymphocyte mediated immunity	21/470	335/18913	0.0626866	2.52253	4.4884	0.000106025	0.00183232	0.00128542	Batf/Bcl3/C1s/C3/Cd28/Cd40/Coro1a/Fcgr2a/Il12b/Il1b/Il6/Nfkbiz/Nod2/RT1-Bb/RT1-CE1/RT1-CE16/RT1-S3/Rsad2/Slfn2/Tnf/Vsir	21	0.0446809
BP	GO:0071805	potassium ion transmembrane transport	17/470	239/18913	0.0711297	2.86229	4.62519	0.000106273	0.00183232	0.00128542	Abcc9/Kcna2/Kcna3/Kcna4/Kcna7/Kcnb2/Kcnc3/Kcng2/Kcnj16/Kcnj4/Kcnma1/Kcnmb1/Kcnn3/Kcnn4/Kcnt1/Mcoln3/Rgs4	17	0.0361702
BP	GO:0051709	regulation of killing of cells of another organism	4/470	11/18913	0.363636	14.6329	7.21991	0.000108157	0.0018579	0.00130337	Cxcl1/Cxcl6/Nos2/Syk	4	0.00851064
BP	GO:0032602	chemokine production	11/470	112/18913	0.0982143	3.95218	5.00223	0.000109086	0.00186008	0.00130489	Cxcl6/Il17f/Il1b/Il6/Kcnn4/Mir146a/Nod2/Syk/Ticam2/Tlr2/Tnf	11	0.0234043
BP	GO:0032642	regulation of chemokine production	11/470	112/18913	0.0982143	3.95218	5.00223	0.000109086	0.00186008	0.00130489	Cxcl6/Il17f/Il1b/Il6/Kcnn4/Mir146a/Nod2/Syk/Ticam2/Tlr2/Tnf	11	0.0234043
BP	GO:0045823	positive regulation of heart contraction	7/470	45/18913	0.155556	6.25962	5.63897	0.000112164	0.00190556	0.0013368	Adm/Apln/Crhr2/Gch1/Nmu/Rgs4/Slc1a1	7	0.0148936
BP	GO:0001975	response to amphetamine	8/470	60/18913	0.133333	5.36539	5.40643	0.000112859	0.00191037	0.00134018	Adora2a/Cxcl1/Cxcl2/Grin1/Rasgrf1/Rgs4/Rgs9/Slc1a1	8	0.0170213
BP	GO:0002718	regulation of cytokine production involved in immune response	12/470	132/18913	0.0909091	3.65822	4.89238	0.000113613	0.00191409	0.00134279	Acp5/Hmox1/Il1b/Il6/Nod2/RT1-CE16/Rsad2/Syk/Tlr2/Tnf/Tnfrsf14/Vsir	12	0.0255319
BP	GO:0001960	negative regulation of cytokine-mediated signaling pathway	10/470	94/18913	0.106383	4.2809	5.0905	0.000114317	0.00191409	0.00134279	Ccdc3/Ccl5/Il1rn/Il6/Mir101a/Mir146a/Mir27b/Mmp12/Otop1/Usp18	10	0.0212766
BP	GO:0002042	cell migration involved in sprouting angiogenesis	10/470	94/18913	0.106383	4.2809	5.0905	0.000114317	0.00191409	0.00134279	Card10/Hmox1/Mir101a/Mir146a/Mir221/Mir27b/Ptgs2/Tgfbr3/Thbs1/Vegfa	10	0.0212766
BP	GO:0010594	regulation of endothelial cell migration	17/470	241/18913	0.0705394	2.83854	4.58551	0.000117601	0.001962	0.0013764	Card10/Cd40/Fgf16/Gpi/Hmox1/Lcn2/Mir101a/Mir146a/Mir221/Mir27b/Ptgs2/Stc1/Tgfbr3/Thbs1/Tnf/Vegfa/Zc3h12a	17	0.0361702
BP	GO:0042102	positive regulation of T cell proliferation	11/470	113/18913	0.0973451	3.91721	4.96512	0.000118198	0.00196488	0.00137842	Ccl5/Cd28/Coro1a/Il12b/Il1a/Il1b/Il6/RT1-CE16/RT1-DMb/Syk/Zap70	11	0.0234043
BP	GO:0045187	regulation of circadian sleep/wake cycle, sleep	6/470	32/18913	0.1875	7.54508	5.91533	0.000119366	0.00197018	0.00138214	Adora2a/Csf2/Il6/Kcna2/Nmu/Pglyrp1	6	0.012766
BP	GO:0060055	angiogenesis involved in wound healing	6/470	32/18913	0.1875	7.54508	5.91533	0.000119366	0.00197018	0.00138214	Cx3cl1/Cxcr4/Hpse/Mir222/Tnf/Vegfa	6	0.012766
BP	GO:0001523	retinoid metabolic process	9/470	77/18913	0.116883	4.70343	5.19824	0.000120809	0.00198693	0.00139388	Abca4/Adh1c/Adh6/Adh7/Akr1b10/Cyp1a1/Cyp2c11/Rbp1/Rbp2	9	0.0191489
BP	GO:0002064	epithelial cell development	18/470	266/18913	0.0676692	2.72304	4.51786	0.000126613	0.00206133	0.00144608	Acta1/Acta2/Actg2/Ccdc88c/Cldn1/Cxcr4/Frzb/Hpse/Il1a/Il1b/Kcnma1/Map7/Notch4/Ntrk1/Podxl/Stc1/Tnf/Vegfa	18	0.0382979
BP	GO:0032944	regulation of mononuclear cell proliferation	18/470	266/18913	0.0676692	2.72304	4.51786	0.000126613	0.00206133	0.00144608	Ccl5/Cd28/Cd40/Coro1a/Il12b/Il1a/Il1b/Il6/Pla2g5/RT1-Bb/RT1-CE16/RT1-DMb/Syk/Tnfrsf14/Tnfrsf9/Vav3/Vsir/Zap70	18	0.0382979
BP	GO:0002708	positive regulation of lymphocyte mediated immunity	13/470	154/18913	0.0844156	3.39692	4.76772	0.00012697	0.00206133	0.00144608	C3/Cd28/Cd40/Fcgr2a/Il12b/Il1b/Il6/Nod2/RT1-CE1/RT1-CE16/RT1-S3/Rsad2/Tnf	13	0.0276596
BP	GO:0060251	regulation of glial cell proliferation	8/470	61/18913	0.131148	5.27743	5.3416	0.000127111	0.00206133	0.00144608	Il1b/Il6/Mir146a/Mir221/Mir222/Ntn1/Tnf/Tspo	8	0.0170213
BP	GO:0032733	positive regulation of interleukin-10 production	7/470	46/18913	0.152174	6.12354	5.55392	0.000129497	0.00208861	0.00146522	Bcl3/Cd28/Il12b/Il6/Nod2/Syk/Tlr2	7	0.0148936
BP	GO:0002768	immune response-regulating cell surface receptor signaling pathway	20/470	315/18913	0.0634921	2.55495	4.44263	0.000129694	0.00208861	0.00146522	C3/Cd28/Cd40/Fcgr2a/Fcgr2al1/Fcho1/Kcnn4/Nfkbia/Nfkbiz/Nod2/RT1-Bb/RT1-CE16/Syk/Ticam2/Tlr2/Tnfaip3/Tnip3/Vav3/Zap70/Zc3h12a	20	0.0425532
BP	GO:0001906	cell killing	16/470	220/18913	0.0727273	2.92658	4.58839	0.000130285	0.00209088	0.00146681	C3/Ccl2/Coro1a/Cxcl1/Cxcl14/Cxcl6/Dnase1l3/Fcgr2a/Gbp7/Il12b/Nos2/Pla2g2a/RT1-CE1/RT1-CE16/RT1-S3/Syk	16	0.0340426
BP	GO:0002367	cytokine production involved in immune response	12/470	134/18913	0.0895522	3.60362	4.82832	0.00013118	0.00209798	0.00147179	Acp5/Hmox1/Il1b/Il6/Nod2/RT1-CE16/Rsad2/Syk/Tlr2/Tnf/Tnfrsf14/Vsir	12	0.0255319
BP	GO:0060986	endocrine hormone secretion	9/470	78/18913	0.115385	4.64313	5.14684	0.000133612	0.00212953	0.00149392	Apln/Crhr2/Cyp19a1/Fst/Hcar2/Il1b/Il6/Tnf/Tspo	9	0.0191489
BP	GO:0051797	regulation of hair follicle development	5/470	21/18913	0.238095	9.58105	6.28077	0.000135806	0.00214973	0.00150809	Fst/Hpse/Ngfr/Tnf/Wnt10b	5	0.0106383
BP	GO:0051956	negative regulation of amino acid transport	5/470	21/18913	0.238095	9.58105	6.28077	0.000135806	0.00214973	0.00150809	Htr6/Il1b/Il1rn/Rgs4/Tnf	5	0.0106383
BP	GO:0061005	cell differentiation involved in kidney development	8/470	62/18913	0.129032	5.19231	5.27818	0.000142815	0.00223842	0.00157031	Acta1/Acta2/Actg2/Mmp9/Mtss1/Osr1/Podxl/Prom1	8	0.0170213
BP	GO:0099601	regulation of neurotransmitter receptor activity	8/470	62/18913	0.129032	5.19231	5.27818	0.000142815	0.00223842	0.00157031	Ccl2/Chrna4/Dapk1/Dlgap2/Nrxn2/Ppargc1a/Rasgrf1/Rgs9	8	0.0170213
BP	GO:0010758	regulation of macrophage chemotaxis	6/470	33/18913	0.181818	7.31644	5.79736	0.000142857	0.00223842	0.00157031	Ccl2/Ccl5/Cx3cl1/Cyp19a1/Il34/Thbs1	6	0.012766
BP	GO:0050671	positive regulation of lymphocyte proliferation	13/470	156/18913	0.0833333	3.35337	4.71164	0.000144572	0.00225766	0.00158381	Ccl5/Cd28/Cd40/Coro1a/Il12b/Il1a/Il1b/Il6/RT1-CE16/RT1-DMb/Syk/Vav3/Zap70	13	0.0276596
BP	GO:0050678	regulation of epithelial cell proliferation	26/470	473/18913	0.0549683	2.21195	4.26124	0.000145771	0.00226679	0.00159021	Apln/Ccl2/Ccl5/Cldn1/Esrp2/Gdf5/Hey1/Hmox1/Il12b/Il6/Mir101a/Mir146a/Mir222/Mir27b/Mmp12/Mtss1/Ngfr/Nod2/Osr1/Pla2g2a/Tgfbr3/Thbs1/Tnf/Tnfaip3/Vegfa/Wnt10b	26	0.0553191
BP	GO:0006163	purine nucleotide metabolic process	24/470	420/18913	0.0571429	2.29945	4.29916	0.000146134	0.00226679	0.00159021	Abcc9/Adss1/Ak4/Aldoc/Cbfa2t3/Ddit4/Dlgap2/Eno2/Gpi/Gucy1a1/Gucy1b1/Gucy2c/Hk2/Hk3/Hsd11b1/Ier3/Myh3/Pfkp/Pgk1/Pgk1l1/Ppargc1a/Qprt/Sult2b1/Tspo	24	0.0510638
BP	GO:1902107	positive regulation of leukocyte differentiation	15/470	200/18913	0.075	3.01803	4.58008	0.000149705	0.00230676	0.00161825	Ccl3/Ccl5/Csf2/Gpr68/Id2/Ikzf1/Il12b/Il34/Il6/Nfkbiz/Syk/Tnf/Vsir/Wnt10b/Zap70	15	0.0319149
BP	GO:1903708	positive regulation of hemopoiesis	15/470	200/18913	0.075	3.01803	4.58008	0.000149705	0.00230676	0.00161825	Ccl3/Ccl5/Csf2/Gpr68/Id2/Ikzf1/Il12b/Il34/Il6/Nfkbiz/Syk/Tnf/Vsir/Wnt10b/Zap70	15	0.0319149
BP	GO:0032102	negative regulation of response to external stimulus	24/470	421/18913	0.0570071	2.29399	4.2863	0.000151464	0.00232612	0.00163184	Acp5/Adora2a/Aph1b/Ccl2/Cyp19a1/Ffar4/Grin1/Ier3/Il12b/Mir146a/Mir221/Mir222/Mmp12/Nod2/Otop1/Pglyrp1/Pla2g5/RT1-CE16/Slit1/Thbs1/Tnf/Tnfaip3/Usp18/Wnt4	24	0.0510638
BP	GO:0009261	ribonucleotide catabolic process	13/470	157/18913	0.0828025	3.33201	4.68395	0.000154134	0.00235155	0.00164968	Aldoc/Cbfa2t3/Ddit4/Eno2/Gpi/Hk2/Hk3/Ier3/Pfkp/Pgk1/Pgk1l1/Ppargc1a/Upp1	13	0.0276596
BP	GO:0106106	cold-induced thermogenesis	13/470	157/18913	0.0828025	3.33201	4.68395	0.000154134	0.00235155	0.00164968	Adrb3/Cidea/Clstn3/Cxcr4/Fabp4/Ffar4/G0s2/Kdm3a/Lcn2/Ppargc1a/Syk/Vegfa/Wnt10b	13	0.0276596
BP	GO:1903532	positive regulation of secretion by cell	23/470	396/18913	0.0580808	2.3372	4.29298	0.000157795	0.00239512	0.00168025	Adora2a/Ankrd1/Ano1/Apln/Cacna1h/Cacna1i/Crhr2/Cyp19a1/Doc2a/Ffar4/Gipr/Gpr68/Hcar2/Htr6/Il1a/Il1b/Il6/Kcnn4/Mmp13/Nmu/Syk/Tlr2/Tnf	23	0.0489362
BP	GO:0097191	extrinsic apoptotic signaling pathway	17/470	247/18913	0.0688259	2.76958	4.46885	0.000158186	0.00239512	0.00168025	Csf2/Cx3cl1/Dapk1/G0s2/Hmox1/Il1a/Il1b/Lcn2/Mir221/Mir222/Nfkbiz/Ret/Thbs1/Tnf/Tnfaip3/Tnfsf15/Vegfa	17	0.0361702
BP	GO:0031620	regulation of fever generation	4/470	12/18913	0.333333	13.4135	6.86663	0.000159055	0.00239512	0.00168025	Ccl5/Il1b/Ptgs2/Tnf	4	0.00851064
BP	GO:0051798	positive regulation of hair follicle development	4/470	12/18913	0.333333	13.4135	6.86663	0.000159055	0.00239512	0.00168025	Fst/Hpse/Tnf/Wnt10b	4	0.00851064
BP	GO:0022408	negative regulation of cell-cell adhesion	16/470	224/18913	0.0714286	2.87432	4.5048	0.000160426	0.00240794	0.00168924	Adora2a/Ass1/Cd69/Dtx1/Il1rn/Mir146a/Mir221/Mir222/Notch4/Pla2g5/Podxl/RT1-Bb/Tnfrsf14/Vegfa/Vsir/Zc3h12a	16	0.0340426
BP	GO:0009117	nucleotide metabolic process	26/470	476/18913	0.0546218	2.19801	4.2259	0.000161126	0.00241066	0.00169114	Abcc9/Adss1/Ak4/Aldoc/Cbfa2t3/Cda/Ddit4/Dlgap2/Eno2/Gpi/Gucy1a1/Gucy1b1/Gucy2c/Hk2/Hk3/Hsd11b1/Ier3/Myh3/Pfkp/Pgk1/Pgk1l1/Ppargc1a/Qprt/Sult2b1/Tspo/Upp1	26	0.0553191
BP	GO:0010721	negative regulation of cell development	20/470	321/18913	0.0623053	2.50719	4.3477	0.000166945	0.0024833	0.0017421	Ccl3/Cd69/Dab1/Dtx1/Frzb/Gpr68/Id2/Il1a/Il1b/Kctd11/Mir146a/Mir221/Mir222/Ntn1/Pglyrp1/Pglyrp2/Slit1/Tspo/Vegfa/Zc3h12a	20	0.0425532
BP	GO:1905952	regulation of lipid localization	15/470	202/18913	0.0742574	2.98815	4.53501	0.000167053	0.0024833	0.0017421	C3/Cidea/Clstn3/Cyp19a1/Il1a/Il1b/Il6/Mir146a/Mir27b/Nfkbia/Syk/Thbs1/Tnf/Tspo/Zc3h12a	15	0.0319149
BP	GO:0051896	regulation of phosphatidylinositol 3-kinase/protein kinase B signal transduction	19/470	297/18913	0.0639731	2.5743	4.36541	0.000172377	0.00255426	0.00179188	Ccl3/Ccl5/Cd28/Chi3l1/Csf2/Csf3/Cx3cl1/Hpse/Il6/Mir146a/Mmp3/Ngfr/Ntrk1/Rasd2/Ret/Thbs1/Tnf/Vav3/Vegfa	19	0.0404255
BP	GO:0032946	positive regulation of mononuclear cell proliferation	13/470	159/18913	0.081761	3.2901	4.62922	0.000174899	0.00258338	0.00181231	Ccl5/Cd28/Cd40/Coro1a/Il12b/Il1a/Il1b/Il6/RT1-CE16/RT1-DMb/Syk/Vav3/Zap70	13	0.0276596
BP	GO:0007204	positive regulation of cytosolic calcium ion concentration	15/470	203/18913	0.0738916	2.97343	4.51268	0.000176362	0.00259672	0.00182167	Adcyap1r1/Adm/Bdkrb2/Cacna1i/Ccl3/Cxcl1/Cxcl2/Cxcl3/Cxcr4/Epor/Ffar4/Gipr/Grin1/Il1b/Nmu	15	0.0319149
BP	GO:0002285	lymphocyte activation involved in immune response	16/470	226/18913	0.0707965	2.84888	4.4637	0.000177653	0.00259922	0.00182343	Batf/Bcl3/Cd28/Cd40/Cd69/Coro1a/Il12b/Il6/Irf8/Nfkbiz/Pglyrp1/Pglyrp2/RT1-DMb/Slc11a1/Slfn2/Zc3h12a	16	0.0340426
BP	GO:0071466	cellular response to xenobiotic stimulus	16/470	226/18913	0.0707965	2.84888	4.4637	0.000177653	0.00259922	0.00182343	Abcc9/Adm/Adss1/Ankrd1/Aox1/Ccl2/Ccl4/Cd69/Cxcr4/Cyp1a1/Cyp2c11/Grin1/Gsta1/Il1b/Nos2/Vegfa	16	0.0340426
BP	GO:0044060	regulation of endocrine process	8/470	64/18913	0.125	5.03005	5.15535	0.000179037	0.00261124	0.00183185	Apln/Crhr2/Cyp19a1/Fst/Il6/Kcnn4/Tnf/Tspo	8	0.0170213
BP	GO:0006813	potassium ion transport	18/470	275/18913	0.0654545	2.63392	4.35712	0.000191615	0.0027707	0.00194372	Abcc9/Cxcl1/Kcna2/Kcna3/Kcna4/Kcna7/Kcnb2/Kcnc3/Kcng2/Kcnj16/Kcnj4/Kcnma1/Kcnmb1/Kcnn3/Kcnn4/Kcnt1/Mcoln3/Rgs4	18	0.0382979
BP	GO:0032890	regulation of organic acid transport	10/470	100/18913	0.1	4.02404	4.84017	0.000191762	0.0027707	0.00194372	Adora2a/Grm1/Htr6/Il1a/Il1b/Il1rn/Rgs4/Syk/Thbs1/Tnf	10	0.0212766
BP	GO:0060761	negative regulation of response to cytokine stimulus	10/470	100/18913	0.1	4.02404	4.84017	0.000191762	0.0027707	0.00194372	Ccdc3/Ccl5/Il1rn/Il6/Mir101a/Mir146a/Mir27b/Mmp12/Otop1/Usp18	10	0.0212766
BP	GO:0046883	regulation of hormone secretion	21/470	350/18913	0.06	2.41443	4.26375	0.00019431	0.00279023	0.00195743	Ano1/Apln/Ccl5/Crhr2/Cyp19a1/Ffar4/Fst/Gipr/Gnaz/Gpr68/Hcar2/Il1b/Il6/Nmu/Nos2/Npy1r/Pde1c/Sstr2/Stxbp5l/Tnf/Tspo	21	0.0446809
BP	GO:0042088	T-helper 1 type immune response	7/470	49/18913	0.142857	5.74863	5.31314	0.000194919	0.00279023	0.00195743	Bcl3/Il12b/Il1b/Nfkbiz/RT1-Bb/Slc11a1/Vegfa	7	0.0148936
BP	GO:1903524	positive regulation of blood circulation	7/470	49/18913	0.142857	5.74863	5.31314	0.000194919	0.00279023	0.00195743	Adm/Apln/Crhr2/Gch1/Nmu/Rgs4/Slc1a1	7	0.0148936
BP	GO:0002763	positive regulation of myeloid leukocyte differentiation	9/470	82/18913	0.109756	4.41663	4.9496	0.000196731	0.0028044	0.00196736	Ccl3/Ccl5/Csf2/Gpr68/Id2/Ikzf1/Il12b/Il34/Tnf	9	0.0191489
BP	GO:1901343	negative regulation of vasculature development	13/470	161/18913	0.0807453	3.24923	4.57535	0.000198024	0.0028044	0.00196736	Ccl2/Crhr2/Cxcl10/Il17f/Mir101a/Mir146a/Mir221/Mir222/Ngfr/Pgk1/Thbs1/Tnf/Wnt4	13	0.0276596
BP	GO:0032615	interleukin-12 production	8/470	65/18913	0.123077	4.95267	5.09585	0.000199795	0.0028044	0.00196736	Acp5/Cd40/Il12b/Irf8/Nod2/Syk/Thbs1/Tlr2	8	0.0170213
BP	GO:0032655	regulation of interleukin-12 production	8/470	65/18913	0.123077	4.95267	5.09585	0.000199795	0.0028044	0.00196736	Acp5/Cd40/Il12b/Irf8/Nod2/Syk/Thbs1/Tlr2	8	0.0170213
BP	GO:0140353	lipid export from cell	8/470	65/18913	0.123077	4.95267	5.09585	0.000199795	0.0028044	0.00196736	Cyp19a1/Il1a/Il1b/Il6/Nos2/Ptgs2/Tnf/Tspo	8	0.0170213
BP	GO:0045932	negative regulation of muscle contraction	6/470	35/18913	0.171429	6.89836	5.57557	0.000200746	0.0028044	0.00196736	Bdkrb1/Gucy1a1/Irag1/Kcnma1/Ptgs2/Zc3h12a	6	0.012766
BP	GO:0045980	negative regulation of nucleotide metabolic process	6/470	35/18913	0.171429	6.89836	5.57557	0.000200746	0.0028044	0.00196736	Cbfa2t3/Cda/Ddit4/Ier3/Ppargc1a/Tspo	6	0.012766
BP	GO:0050802	circadian sleep/wake cycle, sleep	6/470	35/18913	0.171429	6.89836	5.57557	0.000200746	0.0028044	0.00196736	Adora2a/Csf2/Il6/Kcna2/Nmu/Pglyrp1	6	0.012766
BP	GO:0050886	endocrine process	11/470	120/18913	0.0916667	3.68871	4.71669	0.000202048	0.00281411	0.00197418	Apln/Crhr2/Cyp19a1/Enpep/Fst/Hcar2/Il1b/Il6/Kcnn4/Tnf/Tspo	11	0.0234043
BP	GO:0001822	kidney development	23/470	404/18913	0.0569307	2.29092	4.18696	0.000210961	0.00292945	0.00205509	Acta1/Acta2/Actg2/Anpep/Ass1/Ckmt1/Crlf1/Cxcr4/Dchs2/Enpep/Hey1/Heyl/Id2/Itga8/Mmp9/Mtss1/Osr1/Podxl/Prom1/Ret/Slc2a5/Vegfa/Wnt4	23	0.0489362
BP	GO:0050806	positive regulation of synaptic transmission	19/470	302/18913	0.0629139	2.53168	4.28341	0.000213402	0.00295451	0.00207267	Adora2a/Ccl2/Clstn3/Crhr2/Gria2/Grin1/Grin2c/Hap1/Htr6/Mir101a/Mir221/Mir222/Mir23b/Ngfr/Nmu/Ntrk1/Ptgs2/Slc1a1/Tnf	19	0.0404255
BP	GO:0010759	positive regulation of macrophage chemotaxis	5/470	23/18913	0.217391	8.74792	5.93519	0.000215544	0.00296644	0.00208104	Ccl2/Ccl5/Cx3cl1/Il34/Thbs1	5	0.0106383
BP	GO:1903589	positive regulation of blood vessel endothelial cell proliferation involved in sprouting angiogenesis	5/470	23/18913	0.217391	8.74792	5.93519	0.000215544	0.00296644	0.00208104	Hmox1/Mir101a/Mir146a/Mir27b/Vegfa	5	0.0106383
BP	GO:0046640	regulation of alpha-beta T cell proliferation	7/470	50/18913	0.14	5.63366	5.23728	0.000221861	0.00304394	0.00213541	Cd28/Il12b/RT1-CE16/Syk/Tnfrsf14/Vsir/Zap70	7	0.0148936
BP	GO:0032757	positive regulation of interleukin-8 production	8/470	66/18913	0.121212	4.87763	5.03754	0.000222488	0.00304394	0.00213541	Chi3l1/Il1b/Il6/Nod2/Nos2/Syk/Tlr2/Tnf	8	0.0170213
BP	GO:0043467	regulation of generation of precursor metabolites and energy	13/470	163/18913	0.0797546	3.20936	4.52232	0.000223722	0.00305184	0.00214095	Ak4/Bnip3/Cbfa2t3/Cimap2/Ddit4/Hsd11b1/Ier3/Khk/Ppargc1a/Ppp1r3b/Ppp1r3c/Ppp1r3g/Tnf	13	0.0276596
BP	GO:0035821	modulation of process of another organism	4/470	13/18913	0.307692	12.3817	6.55313	0.000225246	0.00305329	0.00214196	Cxcl1/Cxcl6/Nos2/Syk	4	0.00851064
BP	GO:1900147	regulation of Schwann cell migration	4/470	13/18913	0.307692	12.3817	6.55313	0.000225246	0.00305329	0.00214196	Grin1/Mir221/Mir222/Ptprz1	4	0.00851064
BP	GO:0034308	primary alcohol metabolic process	10/470	102/18913	0.0980392	3.94514	4.76104	0.000225804	0.00305329	0.00214196	Adh1c/Adh6/Adh7/Akr1b10/Cacna1h/Cyp1a1/Kcnma1/Rbp1/Rbp2/Wnt4	10	0.0212766
BP	GO:0042749	regulation of circadian sleep/wake cycle	6/470	36/18913	0.166667	6.70674	5.4711	0.000235891	0.00318041	0.00223115	Adora2a/Csf2/Il6/Kcna2/Nmu/Pglyrp1	6	0.012766
BP	GO:0097696	cell surface receptor signaling pathway via STAT	14/470	186/18913	0.0752688	3.02885	4.43889	0.000237708	0.00319563	0.00224182	Bcl3/Ccl5/Cd40/Crlf1/Csf2/Cxcl6/Dab1/Gbp7/Il12b/Il6/Mir146a/Mir221/Ret/Tnf	14	0.0297872
BP	GO:0002573	myeloid leukocyte differentiation	18/470	280/18913	0.0642857	2.58688	4.27056	0.000239072	0.00320467	0.00224817	Acp5/Batf/Cbfa2t3/Ccl2/Ccl3/Ccl5/Csf2/Cxcr4/Cyp19a1/Gpr68/Id2/Ikzf1/Il12b/Il34/Rbp1/Tlr2/Tnf/Vegfa	18	0.0382979
BP	GO:0120162	positive regulation of cold-induced thermogenesis	10/470	103/18913	0.0970874	3.90684	4.72223	0.000244639	0.00326984	0.00229388	Adrb3/Cxcr4/Fabp4/Ffar4/G0s2/Kdm3a/Lcn2/Ppargc1a/Syk/Vegfa	10	0.0212766
BP	GO:1905517	macrophage migration	8/470	67/18913	0.119403	4.80483	4.9804	0.000247251	0.00329525	0.00231171	Ccl2/Ccl3/Ccl5/Cx3cl1/Cyp19a1/Il34/Mmp9/Thbs1	8	0.0170213
BP	GO:0050830	defense response to Gram-positive bacterium	11/470	123/18913	0.0894309	3.59874	4.61587	0.000251019	0.00333589	0.00234022	Acp5/Gbp7/Il17f/Il1b/Nod2/Pglyrp1/Pglyrp2/Pla2g2a/Tlr2/Tnf/Tnfrsf14	11	0.0234043
BP	GO:0008277	regulation of G protein-coupled receptor signaling pathway	13/470	165/18913	0.0787879	3.17046	4.4701	0.000252226	0.00334235	0.00234475	Adm/Apln/C3/Ccl5/Gipr/Grk1/Kctd16/Mir101a/Phf24/Rgs11/Rgs4/Rgs6/Rgs9	13	0.0276596
BP	GO:0046683	response to organophosphorus	15/470	210/18913	0.0714286	2.87432	4.36012	0.000255054	0.0033702	0.00236429	Abcc9/Aldh3a1/Ass1/Atp7b/C1s/Ccl2/Fosl1/Il1b/P2rx6/P2ry6/Pla2g5/Ptgs2/Serpina3n/Stc1/Wnt10b	15	0.0319149
BP	GO:0051259	protein complex oligomerization	18/470	282/18913	0.0638298	2.56854	4.23646	0.000260751	0.00343569	0.00241023	Cldn1/Gria2/Grin1/Kcna2/Kcna3/Kcna4/Kcna7/Kcnb2/Kcnc3/Kcng2/Kcnn4/Kctd11/Kctd16/Mapt/Slc1a2/Steap4/Tgm2/Zc3h12a	18	0.0382979
BP	GO:0002922	positive regulation of humoral immune response	5/470	24/18913	0.208333	8.38342	5.77778	0.000266744	0.00348495	0.00244479	C3/Il17f/Il1b/Nod2/Tnf	5	0.0106383
BP	GO:0035633	maintenance of blood-brain barrier	5/470	24/18913	0.208333	8.38342	5.77778	0.000266744	0.00348495	0.00244479	Bdkrb2/Mfsd2a/Ptgs2/Slc1a1/Vegfa	5	0.0106383
BP	GO:0045986	negative regulation of smooth muscle contraction	5/470	24/18913	0.208333	8.38342	5.77778	0.000266744	0.00348495	0.00244479	Bdkrb1/Gucy1a1/Irag1/Kcnma1/Ptgs2	5	0.0106383
BP	GO:0010951	negative regulation of endopeptidase activity	12/470	145/18913	0.0827586	3.33024	4.49653	0.000275278	0.0035818	0.00251273	Adora2a/Gpi/Il6/Mmp9/Ptgs2/Serpina3a/Serpina3n/Serpinb10/Serpinb2/Thbs1/Tnf/Vegfa	12	0.0255319
BP	GO:0090322	regulation of superoxide metabolic process	6/470	37/18913	0.162162	6.52547	5.37053	0.000275701	0.0035818	0.00251273	Acp5/Cxcl1/Gch1/Mapt/Mir27b/Syk	6	0.012766
BP	GO:0001508	action potential	14/470	189/18913	0.0740741	2.98077	4.36886	0.000280304	0.00363142	0.00254754	Abcc9/Cacna1h/Cacna1i/Chrna4/Dsc2/Kcna2/Kcna3/Kcna4/Kcna7/Kcnb2/Kcnc3/Kcng2/Kcnma1/Tnf	14	0.0297872
BP	GO:0016101	diterpenoid metabolic process	9/470	86/18913	0.104651	4.21121	4.76463	0.000282887	0.00365468	0.00256386	Abca4/Adh1c/Adh6/Adh7/Akr1b10/Cyp1a1/Cyp2c11/Rbp1/Rbp2	9	0.0191489
BP	GO:0051607	defense response to virus	18/470	284/18913	0.0633803	2.55045	4.20266	0.000284123	0.00365825	0.00256636	Abcc9/Bnip3/Cd40/Cxcl10/Ddit4/Gbp7/Il12b/Il1b/Il6/Mmp12/Oasl/Rsad2/Ticam2/Tlr2/Tnf/Trim7/Usp18/Zc3h12a	18	0.0382979
BP	GO:0032692	negative regulation of interleukin-1 production	7/470	52/18913	0.134615	5.41698	5.09151	0.000284741	0.00365825	0.00256636	Acp5/Cx3cl1/Ffar4/Mir101a/Mir27b/Tnfaip3/Zc3h12a	7	0.0148936
BP	GO:0071715	icosanoid transport	8/470	69/18913	0.115942	4.66556	4.86945	0.000303557	0.00388922	0.00272839	Bdkrb2/Il1a/Il1b/Nos2/Pla2g2a/Pla2g5/Ptgs2/Syk	8	0.0170213
BP	GO:0016045	detection of bacterium	4/470	14/18913	0.285714	11.4973	6.27224	0.000309173	0.0039394	0.0027636	Nod2/Pglyrp1/Pglyrp2/Tlr2	4	0.00851064
BP	GO:0036135	Schwann cell migration	4/470	14/18913	0.285714	11.4973	6.27224	0.000309173	0.0039394	0.0027636	Grin1/Mir221/Mir222/Ptprz1	4	0.00851064
BP	GO:0019362	pyridine nucleotide metabolic process	14/470	191/18913	0.0732984	2.94956	4.32294	0.000312206	0.00395631	0.00277546	Aldoc/Cbfa2t3/Ddit4/Eno2/Gpi/Hk2/Hk3/Hsd11b1/Ier3/Pfkp/Pgk1/Pgk1l1/Ppargc1a/Qprt	14	0.0297872
BP	GO:0046496	nicotinamide nucleotide metabolic process	14/470	191/18913	0.0732984	2.94956	4.32294	0.000312206	0.00395631	0.00277546	Aldoc/Cbfa2t3/Ddit4/Eno2/Gpi/Hk2/Hk3/Hsd11b1/Ier3/Pfkp/Pgk1/Pgk1l1/Ppargc1a/Qprt	14	0.0297872
BP	GO:0009636	response to toxic substance	20/470	337/18913	0.0593472	2.38816	4.10468	0.000315964	0.00398218	0.00279361	Akr1b10/Ass1/Ccl3/Ccl4/Ccl5/Cldn1/Cyp19a1/Cyp1a1/Gch1/Gria2/Grin1/Gucy1a1/Gucy2c/Lcn2/Mt1/Mt2A/Ptgs2/Slc11a1/Tlr2/Tnf	20	0.0425532
BP	GO:0009746	response to hexose	20/470	337/18913	0.0593472	2.38816	4.10468	0.000315964	0.00398218	0.00279361	Ano1/Ccl2/Crhr2/Cyp19a1/Gipr/Gpr68/Il1b/Khk/Lcn2/Mir146a/Mir221/Mir222/Nos2/Pde1c/Ppargc1a/Ptgs2/Slc2a3/Slc2a5/Thbs1/Tnf	20	0.0425532
BP	GO:0001649	osteoblast differentiation	17/470	262/18913	0.0648855	2.61102	4.19182	0.000317167	0.0039865	0.00279664	Ccl3/Cebpd/Dhh/Ffar4/Gdpd2/Hey1/Id2/Il6/Mir221/Mir222/Mmp13/Panx3/Tgfbr3/Tnf/Vegfa/Wnt10b/Wnt4	17	0.0361702
BP	GO:0022410	circadian sleep/wake cycle process	6/470	38/18913	0.157895	6.35375	5.27361	0.0003206	0.00401476	0.00281646	Adora2a/Csf2/Il6/Kcna2/Nmu/Pglyrp1	6	0.012766
BP	GO:0042572	retinol metabolic process	7/470	53/18913	0.132075	5.31477	5.02142	0.000321146	0.00401476	0.00281646	Adh1c/Adh6/Adh7/Akr1b10/Cyp1a1/Rbp1/Rbp2	7	0.0148936
BP	GO:1903522	regulation of blood circulation	18/470	287/18913	0.0627178	2.52379	4.15249	0.000322599	0.00402208	0.0028216	Abcc9/Adm/Apln/Cacna1h/Crhr2/Cx3cl1/Dsc2/Faah/Gch1/Hopx/Nmu/Npy1r/Ptgs2/Rgs4/Slc1a1/Stc1/Tnf/Zc3h12a	18	0.0382979
BP	GO:0072001	renal system development	23/470	417/18913	0.0551559	2.2195	4.01986	0.000331453	0.00411218	0.00288481	Acta1/Acta2/Actg2/Anpep/Ass1/Ckmt1/Crlf1/Cxcr4/Dchs2/Enpep/Hey1/Heyl/Id2/Itga8/Mmp9/Mtss1/Osr1/Podxl/Prom1/Ret/Slc2a5/Vegfa/Wnt4	23	0.0489362
BP	GO:0071385	cellular response to glucocorticoid stimulus	11/470	127/18913	0.0866142	3.48539	4.48623	0.000331599	0.00411218	0.00288481	Ass1/Ccl2/Crhr2/Ddit4/Hey1/Il6/RT1-Bb/Serpina3n/Sstr2/Stc1/Vegfa	11	0.0234043
BP	GO:0043154	negative regulation of cysteine-type endopeptidase activity involved in apoptotic process	8/470	70/18913	0.114286	4.59891	4.81556	0.000335401	0.00414823	0.0029101	Adora2a/Gpi/Il6/Mmp9/Ptgs2/Thbs1/Tnf/Vegfa	8	0.0170213
BP	GO:0015800	acidic amino acid transport	9/470	88/18913	0.102273	4.1155	4.67631	0.000336465	0.00415033	0.00291157	Adora2a/Grm1/Htr6/Il1b/Il1rn/Slc1a1/Slc1a2/Slc1a6/Tnf	9	0.0191489
BP	GO:0043433	negative regulation of DNA-binding transcription factor activity	13/470	170/18913	0.0764706	3.07721	4.34297	0.000337402	0.00415085	0.00291194	Bcl3/Bhlhe40/Coro1a/Egln1/Heyl/Hmox1/Id2/Mir101a/Mturn/Nfkbia/Nod2/Tnfaip3/Zc3h12a	13	0.0276596
BP	GO:0030856	regulation of epithelial cell differentiation	14/470	193/18913	0.0725389	2.91899	4.27761	0.000347169	0.00425971	0.00298831	Frzb/Fst/Hey1/Il1a/Il1b/Maff/Mmp9/Notch4/Osr1/Prom1/Sult2b1/Tnf/Vegfa/Wnt10b	14	0.0297872
BP	GO:0009205	purine ribonucleoside triphosphate metabolic process	16/470	240/18913	0.0666667	2.6827	4.18799	0.000349955	0.00428257	0.00300434	Abcc9/Ak4/Aldoc/Cbfa2t3/Ddit4/Eno2/Gpi/Hk2/Hk3/Ier3/Myh3/Pfkp/Pgk1/Pgk1l1/Ppargc1a/Tspo	16	0.0340426
BP	GO:0006869	lipid transport	25/470	473/18913	0.0528541	2.12687	3.96211	0.000351593	0.00429128	0.00301045	Abca4/Apol7al1/Atg9b/Bdkrb2/Cidea/Cyp19a1/Fabp4/Il1a/Il1b/Il6/Kcnn4/Mfsd2a/Mir27b/Nfkbia/Nos2/Pla2g2a/Pla2g5/Ptgs2/Rbp1/Rbp2/Slc2a1/Syk/Thbs1/Tnf/Tspo	25	0.0531915
BP	GO:0009154	purine ribonucleotide catabolic process	12/470	149/18913	0.0805369	3.24084	4.38372	0.000353619	0.00429693	0.00301441	Aldoc/Cbfa2t3/Ddit4/Eno2/Gpi/Hk2/Hk3/Ier3/Pfkp/Pgk1/Pgk1l1/Ppargc1a	12	0.0255319
BP	GO:0043491	phosphatidylinositol 3-kinase/protein kinase B signal transduction	20/470	340/18913	0.0588235	2.36708	4.06065	0.000354186	0.00429693	0.00301441	Ccl3/Ccl5/Cd28/Cd40/Chi3l1/Csf2/Csf3/Cx3cl1/Hpse/Il6/Mir146a/Mmp3/Ngfr/Ntrk1/Rasd2/Ret/Thbs1/Tnf/Vav3/Vegfa	20	0.0425532
BP	GO:0035249	synaptic transmission, glutamatergic	11/470	128/18913	0.0859375	3.45816	4.45463	0.000354835	0.00429693	0.00301441	Adora2a/Aph1b/Ccl2/Clstn3/Gria2/Grin1/Grin2c/Grm1/Ngfr/Ntrk1/Ptgs2	11	0.0234043
BP	GO:0036230	granulocyte activation	7/470	54/18913	0.12963	5.21635	4.95309	0.000361191	0.00435118	0.00305247	Ccl3/Ccl5/Cxcl6/Dnase1l3/Pla2g2a/Syk/Tnf	7	0.0148936
BP	GO:0046633	alpha-beta T cell proliferation	7/470	54/18913	0.12963	5.21635	4.95309	0.000361191	0.00435118	0.00305247	Cd28/Il12b/RT1-CE16/Syk/Tnfrsf14/Vsir/Zap70	7	0.0148936
BP	GO:0062197	cellular response to chemical stress	22/470	393/18913	0.0559796	2.25264	4.00595	0.000362896	0.00436039	0.00305894	Abcc9/Bdkrb2/Bnip3/Ccl5/Cyp19a1/Dapk1/Gch1/Hk3/Il6/Lcn2/Mmp3/Nefh/Ngfr/Ppargc1a/Ptgs2/Rcsd1/Scn7a/Slc1a1/Slc2a1/Tnfaip3/Tspo/Zc3h12a	22	0.0468085
BP	GO:0051966	regulation of synaptic transmission, glutamatergic	9/470	89/18913	0.101124	4.06926	4.63313	0.00036624	0.00438921	0.00307915	Adora2a/Ccl2/Gria2/Grin1/Grin2c/Grm1/Ngfr/Ntrk1/Ptgs2	9	0.0191489
BP	GO:0009743	response to carbohydrate	22/470	394/18913	0.0558376	2.24693	3.99284	0.000375692	0.00448196	0.00314422	Acp5/Ano1/Ccl2/Crhr2/Cyp19a1/Gipr/Gpr68/Il1a/Il1b/Khk/Lcn2/Mir146a/Mir221/Mir222/Nos2/Pde1c/Ppargc1a/Ptgs2/Slc2a3/Slc2a5/Thbs1/Tnf	22	0.0468085
BP	GO:0002702	positive regulation of production of molecular mediator of immune response	12/470	150/18913	0.08	3.21923	4.35612	0.000375913	0.00448196	0.00314422	Cd28/Cd40/Gpi/Il17f/Il1b/Il6/Nod2/RT1-CE16/Rsad2/Syk/Tlr2/Tnfrsf14	12	0.0255319
BP	GO:0070542	response to fatty acid	10/470	109/18913	0.0917431	3.69178	4.49914	0.000387454	0.00460772	0.00323244	Ass1/Ccl2/Cldn1/Gipr/Hmox1/Il1b/Ppargc1a/Ptgs2/Tlr2/Zc3h12a	10	0.0212766
BP	GO:2000310	regulation of NMDA receptor activity	5/470	26/18913	0.192308	7.73854	5.48875	0.000396257	0.00470036	0.00329743	Ccl2/Dapk1/Ppargc1a/Rasgrf1/Rgs9	5	0.0106383
BP	GO:0019722	calcium-mediated signaling	16/470	243/18913	0.0658436	2.64958	4.13147	0.000401551	0.004751	0.00333296	Camk1g/Ccl20/Ccl3/Ccl4/Cxcr4/Cyp19a1/Egln1/Gria2/Grin1/Grin2c/Grm1/Mapt/Mcoln3/Syk/Tnf/Zap70	16	0.0340426
BP	GO:0048512	circadian behavior	8/470	72/18913	0.111111	4.47116	4.71076	0.000407265	0.00480635	0.00337179	Adora2a/Csf2/Id2/Il6/Kcna2/Kcnma1/Nmu/Pglyrp1	8	0.0170213
BP	GO:0009895	negative regulation of catabolic process	21/470	370/18913	0.0567568	2.28392	3.98152	0.000409313	0.00481826	0.00338014	Cbfa2t3/Cidea/Ddit4/Grin2c/Hcar2/Hmox1/Ier3/Il1b/Klhl40/Larp1bl/Mfsd2a/Nos2/Ppargc1a/Ppp1r3b/Rragd/Slc11a1/Slfn2/Tent5c/Tnf/Tspo/Vegfa	21	0.0446809
BP	GO:0006002	fructose 6-phosphate metabolic process	4/470	15/18913	0.266667	10.7308	6.01849	0.000413355	0.00482906	0.00338772	Gpi/Hk2/Hk3/Pfkp	4	0.00851064
BP	GO:0032604	granulocyte macrophage colony-stimulating factor production	4/470	15/18913	0.266667	10.7308	6.01849	0.000413355	0.00482906	0.00338772	Il12b/Il17f/Il1b/Syk	4	0.00851064
BP	GO:0032645	regulation of granulocyte macrophage colony-stimulating factor production	4/470	15/18913	0.266667	10.7308	6.01849	0.000413355	0.00482906	0.00338772	Il12b/Il17f/Il1b/Syk	4	0.00851064
BP	GO:0034765	regulation of monoatomic ion transmembrane transport	23/470	424/18913	0.0542453	2.18285	3.93241	0.000418621	0.00487831	0.00342226	Abcc9/Adcyap1r1/Bdkrb1/Ccl2/Chrna4/Coro1a/Cx3cl1/Cxcl10/Fgf11/Grin1/Grin2c/Hap1/Kcnj16/Kcnj4/Kcnmb1/Kcnn4/Lcn2/Mmp9/Osr1/P2ry6/Rgs4/Rgs9/Stac2	23	0.0489362
BP	GO:0009166	nucleotide catabolic process	13/470	174/18913	0.0747126	3.00647	4.24459	0.000422141	0.004907	0.00344239	Aldoc/Cbfa2t3/Ddit4/Eno2/Gpi/Hk2/Hk3/Ier3/Pfkp/Pgk1/Pgk1l1/Ppargc1a/Upp1	13	0.0276596
BP	GO:0002040	sprouting angiogenesis	14/470	197/18913	0.071066	2.85973	4.18868	0.00042724	0.00494399	0.00346835	Card10/Hmox1/Il12b/Mir101a/Mir146a/Mir221/Mir222/Mir27b/Ngfr/Ptgs2/Tgfbr3/Tgm2/Thbs1/Vegfa	14	0.0297872
BP	GO:0051953	negative regulation of amine transport	6/470	40/18913	0.15	6.03606	5.08982	0.000427456	0.00494399	0.00346835	Crhr2/Htr6/Il1b/Il1rn/Rgs4/Tnf	6	0.012766
BP	GO:0002429	immune response-activating cell surface receptor signaling pathway	18/470	294/18913	0.0612245	2.4637	4.03784	0.000430416	0.00496585	0.00348368	C3/Cd28/Fcgr2a/Fcho1/Kcnn4/Nfkbia/Nfkbiz/Nod2/RT1-Bb/RT1-CE16/Syk/Ticam2/Tlr2/Tnfaip3/Tnip3/Vav3/Zap70/Zc3h12a	18	0.0382979
BP	GO:0120161	regulation of cold-induced thermogenesis	12/470	153/18913	0.0784314	3.15611	4.27467	0.000450055	0.00517955	0.00363359	Adrb3/Cidea/Cxcr4/Fabp4/Ffar4/G0s2/Kdm3a/Lcn2/Ppargc1a/Syk/Vegfa/Wnt10b	12	0.0255319
BP	GO:1904407	positive regulation of nitric oxide metabolic process	7/470	56/18913	0.125	5.03005	4.82137	0.00045325	0.0052034	0.00365033	Ass1/Il1b/Il6/Ptgs2/Tlr2/Tmem106a/Tnf	7	0.0148936
BP	GO:1990845	adaptive thermogenesis	13/470	176/18913	0.0738636	2.9723	4.19645	0.000470879	0.00539244	0.00378294	Adrb3/Cidea/Clstn3/Cxcr4/Fabp4/Ffar4/G0s2/Kdm3a/Lcn2/Ppargc1a/Syk/Vegfa/Wnt10b	13	0.0276596
BP	GO:0009199	ribonucleoside triphosphate metabolic process	16/470	247/18913	0.0647773	2.60667	4.05743	0.000480442	0.00548839	0.00385026	Abcc9/Ak4/Aldoc/Cbfa2t3/Ddit4/Eno2/Gpi/Hk2/Hk3/Ier3/Myh3/Pfkp/Pgk1/Pgk1l1/Ppargc1a/Tspo	16	0.0340426
BP	GO:0043542	endothelial cell migration	18/470	297/18913	0.0606061	2.43881	3.98971	0.000485417	0.00553161	0.00388057	Card10/Cd40/Cxcr4/Fgf16/Gpi/Hmox1/Lcn2/Mir101a/Mir146a/Mir221/Mir27b/Ptgs2/Stc1/Tgfbr3/Thbs1/Tnf/Vegfa/Zc3h12a	18	0.0382979
BP	GO:0006801	superoxide metabolic process	8/470	74/18913	0.108108	4.35032	4.60972	0.000491168	0.00555619	0.00389782	Acp5/Cxcl1/Gch1/Mapt/Mir27b/Nos2/Slc1a1/Syk	8	0.0170213
BP	GO:0010332	response to gamma radiation	8/470	74/18913	0.108108	4.35032	4.60972	0.000491168	0.00555619	0.00389782	Ccl2/Ccl7/Cxcl1/Cxcl10/Cxcl2/Cxcl6/Il1a/Il1b	8	0.0170213
BP	GO:0015909	long-chain fatty acid transport	8/470	74/18913	0.108108	4.35032	4.60972	0.000491168	0.00555619	0.00389782	Bdkrb2/Fabp4/Mfsd2a/Pla2g2a/Pla2g5/Slc2a1/Syk/Thbs1	8	0.0170213
BP	GO:0060078	regulation of postsynaptic membrane potential	13/470	177/18913	0.0734463	2.95551	4.17264	0.000496985	0.00558336	0.00391688	Adora2a/Chrna4/Cx3cl1/Gria2/Grin1/Grin2c/Grm1/Kcna2/Kcnt1/Kctd16/Ngfr/P2rx6/Rgs4	13	0.0276596
BP	GO:0071229	cellular response to acid chemical	14/470	200/18913	0.07	2.81683	4.12344	0.000497182	0.00558336	0.00391688	Ass1/Ccl5/Cyp19a1/Epor/Gria2/Grin1/Mir101a/Mir221/Mir222/Mmp3/Ptgs2/Rragd/Tnf/Vegfa	14	0.0297872
BP	GO:0072524	pyridine-containing compound metabolic process	14/470	200/18913	0.07	2.81683	4.12344	0.000497182	0.00558336	0.00391688	Aldoc/Cbfa2t3/Ddit4/Eno2/Gpi/Hk2/Hk3/Hsd11b1/Ier3/Pfkp/Pgk1/Pgk1l1/Ppargc1a/Qprt	14	0.0297872
BP	GO:0009144	purine nucleoside triphosphate metabolic process	16/470	248/18913	0.0645161	2.59616	4.03914	0.000502125	0.00562526	0.00394627	Abcc9/Ak4/Aldoc/Cbfa2t3/Ddit4/Eno2/Gpi/Hk2/Hk3/Ier3/Myh3/Pfkp/Pgk1/Pgk1l1/Ppargc1a/Tspo	16	0.0340426
BP	GO:2001233	regulation of apoptotic signaling pathway	24/470	458/18913	0.0524017	2.10867	3.83424	0.000518645	0.00579633	0.00406628	Adora2a/Bdkrb2/Csf2/Cx3cl1/G0s2/Higd1a/Hmox1/Ier3/Il1b/Mir146a/Mir221/Mir222/Mir27b/Mmp9/Ngfr/Ptgs2/Ret/Septin4/Thbs1/Tnf/Tnfaip3/Tnfsf15/Vegfa/Wnt4	24	0.0510638
BP	GO:2001236	regulation of extrinsic apoptotic signaling pathway	13/470	178/18913	0.0730337	2.93891	4.14899	0.000524305	0.0058455	0.00410078	Csf2/Cx3cl1/G0s2/Hmox1/Il1b/Mir221/Mir222/Ret/Thbs1/Tnf/Tnfaip3/Tnfsf15/Vegfa	13	0.0276596
BP	GO:0007622	rhythmic behavior	8/470	75/18913	0.106667	4.29231	4.56054	0.000538082	0.00596724	0.00418618	Adora2a/Csf2/Id2/Il6/Kcna2/Kcnma1/Nmu/Pglyrp1	8	0.0170213
BP	GO:0032732	positive regulation of interleukin-1 production	8/470	75/18913	0.106667	4.29231	4.56054	0.000538082	0.00596724	0.00418618	Ccl20/Ccl3/Il6/Nod2/Panx3/Tlr2/Tmem106a/Tnf	8	0.0170213
BP	GO:0009635	response to herbicide	4/470	16/18913	0.25	10.0601	5.7876	0.000540371	0.00596724	0.00418618	Cyp19a1/Cyp1a1/Gucy1a1/Lcn2	4	0.00851064
BP	GO:0044557	relaxation of smooth muscle	4/470	16/18913	0.25	10.0601	5.7876	0.000540371	0.00596724	0.00418618	Bdkrb1/Gucy1a1/Irag1/Kcnma1	4	0.00851064
BP	GO:0002437	inflammatory response to antigenic stimulus	9/470	94/18913	0.0957447	3.85281	4.42629	0.000549596	0.00605469	0.00424753	Bdkrb2/C3/Cd28/Fcgr2a/Il12b/Il1b/Il1rn/Nod2/Tnf	9	0.0191489
BP	GO:0050767	regulation of neurogenesis	25/470	488/18913	0.0512295	2.0615	3.79251	0.000555668	0.00610708	0.00428428	Bhlhe40/Cx3cl1/Cxcr4/Dab1/Dcx/Hap1/Hes3/Heyl/Id2/Il1b/Il34/Il6/Kctd11/Mapt/Mir146a/Mir221/Mir222/Ntn1/Ptprz1/Slit1/Tgm2/Tlr2/Tnf/Tspo/Vegfa	25	0.0531915
BP	GO:0035710	CD4-positive, alpha-beta T cell activation	11/470	135/18913	0.0814815	3.27885	4.24189	0.00055897	0.00612885	0.00429956	Batf/Bcl3/Cd28/Cd69/Il12b/Il6/Nfkbiz/Rsad2/Tnfrsf14/Vsir/Zc3h12a	11	0.0234043
BP	GO:0071392	cellular response to estradiol stimulus	7/470	58/18913	0.12069	4.8566	4.69578	0.000563123	0.00614532	0.00431111	Ccl2/Hsd11b1/Il6/Nefh/Ppargc1a/Sstr2/Wnt4	7	0.0148936
BP	GO:0089718	amino acid import across plasma membrane	7/470	58/18913	0.12069	4.8566	4.69578	0.000563123	0.00614532	0.00431111	Grm1/Rgs4/Slc1a1/Slc1a2/Slc1a6/Slc6a7/Tnf	7	0.0148936
BP	GO:0031341	regulation of cell killing	11/470	136/18913	0.0808824	3.25474	4.21264	0.00059487	0.00647654	0.00454347	Ccl2/Cxcl1/Cxcl6/Dnase1l3/Fcgr2a/Il12b/Nos2/RT1-CE1/RT1-CE16/RT1-S3/Syk	11	0.0234043
BP	GO:0007623	circadian rhythm	17/470	277/18913	0.0613718	2.46963	3.93345	0.000599485	0.00648189	0.00454722	Adora2a/Ass1/Atp7b/Bhlhe40/Csf2/Fbxl21/Id2/Il6/Kcna2/Kcnma1/Ngfr/Nmu/Nos2/Ntrk1/Pglyrp1/Ppargc1a/Tnf	17	0.0361702
BP	GO:0006195	purine nucleotide catabolic process	12/470	158/18913	0.0759494	3.05623	4.14328	0.000600951	0.00648189	0.00454722	Aldoc/Cbfa2t3/Ddit4/Eno2/Gpi/Hk2/Hk3/Ier3/Pfkp/Pgk1/Pgk1l1/Ppargc1a	12	0.0255319
BP	GO:0043535	regulation of blood vessel endothelial cell migration	12/470	158/18913	0.0759494	3.05623	4.14328	0.000600951	0.00648189	0.00454722	Card10/Cd40/Hmox1/Mir101a/Mir146a/Mir221/Mir27b/Ptgs2/Tgfbr3/Thbs1/Tnf/Vegfa	12	0.0255319
BP	GO:2000181	negative regulation of blood vessel morphogenesis	12/470	158/18913	0.0759494	3.05623	4.14328	0.000600951	0.00648189	0.00454722	Ccl2/Crhr2/Cxcl10/Il17f/Mir146a/Mir221/Mir222/Ngfr/Pgk1/Thbs1/Tnf/Wnt4	12	0.0255319
BP	GO:0021537	telencephalon development	21/470	382/18913	0.0549738	2.21217	3.82074	0.00062024	0.00667441	0.00468228	Bnip3/Cxcr4/Cyp19a1/Dab1/Dcx/Gria2/Grin1/Htr6/Id2/Kcna2/Kcna3/Kcnc3/Mfsd2a/Mgarp/Nefh/Neurod6/Ptprz1/Slc1a2/Slc2a1/Slc2a3/Slit1	21	0.0446809
BP	GO:0051952	regulation of amine transport	10/470	116/18913	0.0862069	3.469	4.25802	0.000635678	0.0068138	0.00478007	Adora2a/Chrna4/Crhr2/Grm1/Htr6/Il1b/Il1rn/Kcna2/Rgs4/Tnf	10	0.0212766
BP	GO:0002861	regulation of inflammatory response to antigenic stimulus	6/470	43/18913	0.139535	5.61494	4.83634	0.0006376	0.0068138	0.00478007	C3/Cd28/Fcgr2a/Il12b/Nod2/Tnf	6	0.012766
BP	GO:0032691	negative regulation of interleukin-1 beta production	6/470	43/18913	0.139535	5.61494	4.83634	0.0006376	0.0068138	0.00478007	Acp5/Ffar4/Mir101a/Mir27b/Tnfaip3/Zc3h12a	6	0.012766
BP	GO:0006721	terpenoid metabolic process	9/470	96/18913	0.09375	3.77254	4.34751	0.000641367	0.00683773	0.00479686	Abca4/Adh1c/Adh6/Adh7/Akr1b10/Cyp1a1/Cyp2c11/Rbp1/Rbp2	9	0.0191489
BP	GO:2000117	negative regulation of cysteine-type endopeptidase activity	8/470	77/18913	0.103896	4.18082	4.4647	0.000642788	0.00683773	0.00479686	Adora2a/Gpi/Il6/Mmp9/Ptgs2/Thbs1/Tnf/Vegfa	8	0.0170213
BP	GO:0014048	regulation of glutamate secretion	5/470	29/18913	0.172414	6.938	5.10851	0.000672829	0.00710434	0.00498389	Adora2a/Grm1/Htr6/Il1b/Il1rn	5	0.0106383
BP	GO:0046641	positive regulation of alpha-beta T cell proliferation	5/470	29/18913	0.172414	6.938	5.10851	0.000672829	0.00710434	0.00498389	Cd28/Il12b/RT1-CE16/Syk/Zap70	5	0.0106383
BP	GO:1905523	positive regulation of macrophage migration	5/470	29/18913	0.172414	6.938	5.10851	0.000672829	0.00710434	0.00498389	Ccl2/Ccl5/Cx3cl1/Il34/Thbs1	5	0.0106383
BP	GO:0071214	cellular response to abiotic stimulus	23/470	439/18913	0.0523918	2.10827	3.75058	0.000675509	0.00710434	0.00498389	Adss1/Ankrd1/Bdkrb2/Bnip3/Cd40/Cyp19a1/Gpr68/Grk1/Grm1/Il1b/Insrr/Kcnj4/Lcn2/Mmp3/Mmp9/Ptgs2/Rcsd1/Rgs9/Scn7a/Slc2a1/Tnf/Tspo/Vegfa	23	0.0489362
BP	GO:0104004	cellular response to environmental stimulus	23/470	439/18913	0.0523918	2.10827	3.75058	0.000675509	0.00710434	0.00498389	Adss1/Ankrd1/Bdkrb2/Bnip3/Cd40/Cyp19a1/Gpr68/Grk1/Grm1/Il1b/Insrr/Kcnj4/Lcn2/Mmp3/Mmp9/Ptgs2/Rcsd1/Rgs9/Scn7a/Slc2a1/Tnf/Tspo/Vegfa	23	0.0489362
BP	GO:0042445	hormone metabolic process	16/470	255/18913	0.0627451	2.52489	3.91361	0.000678782	0.0071226	0.0049967	Adh1c/Adh6/Adh7/Adm/Akr1b10/Cacna1h/Cyp19a1/Cyp1a1/Cyp2c11/Hsd11b1/Kcnma1/Ppargc1a/Rbp1/Rbp2/Stc2/Wnt4	16	0.0340426
BP	GO:0014075	response to amine	9/470	97/18913	0.0927835	3.73365	4.3089	0.000691739	0.00714433	0.00501194	Adora2a/Ass1/Cxcl1/Cxcl2/Grin1/Rasgrf1/Rgs4/Rgs9/Slc1a1	9	0.0191489
BP	GO:0008212	mineralocorticoid metabolic process	4/470	17/18913	0.235294	9.46834	5.57621	0.000692843	0.00714433	0.00501194	Cacna1h/Hsd11b1/Kcnma1/Wnt4	4	0.00851064
BP	GO:0098543	detection of other organism	4/470	17/18913	0.235294	9.46834	5.57621	0.000692843	0.00714433	0.00501194	Nod2/Pglyrp1/Pglyrp2/Tlr2	4	0.00851064
BP	GO:0030857	negative regulation of epithelial cell differentiation	7/470	60/18913	0.116667	4.69472	4.57581	0.000693176	0.00714433	0.00501194	Frzb/Fst/Il1a/Mmp9/Notch4/Osr1/Vegfa	7	0.0148936
BP	GO:0031640	killing of cells of another organism	7/470	60/18913	0.116667	4.69472	4.57581	0.000693176	0.00714433	0.00501194	Cxcl1/Cxcl14/Cxcl6/Gbp7/Nos2/Pla2g2a/Syk	7	0.0148936
BP	GO:0071622	regulation of granulocyte chemotaxis	7/470	60/18913	0.116667	4.69472	4.57581	0.000693176	0.00714433	0.00501194	Ccl2/Ccl5/Cx3cl1/Il1b/Il34/Nod2/Thbs1	7	0.0148936
BP	GO:0141061	disruption of cell in another organism	7/470	60/18913	0.116667	4.69472	4.57581	0.000693176	0.00714433	0.00501194	Cxcl1/Cxcl14/Cxcl6/Gbp7/Nos2/Pla2g2a/Syk	7	0.0148936
BP	GO:1904707	positive regulation of vascular associated smooth muscle cell proliferation	7/470	60/18913	0.116667	4.69472	4.57581	0.000693176	0.00714433	0.00501194	Mir146a/Mir221/Mir222/Mmp9/P2ry6/Ppargc1a/Tnf	7	0.0148936
BP	GO:0032570	response to progesterone	8/470	78/18913	0.102564	4.12722	4.418	0.00070098	0.00717692	0.00503481	Adh1c/C3/Ccl2/Fosl1/Gpi/Tlr2/Tspo/Vegfa	8	0.0170213
BP	GO:0032722	positive regulation of chemokine production	8/470	78/18913	0.102564	4.12722	4.418	0.00070098	0.00717692	0.00503481	Il17f/Il1b/Il6/Nod2/Syk/Ticam2/Tlr2/Tnf	8	0.0170213
BP	GO:0046635	positive regulation of alpha-beta T cell activation	8/470	78/18913	0.102564	4.12722	4.418	0.00070098	0.00717692	0.00503481	Cd28/Il12b/Il6/Nfkbiz/RT1-Bb/RT1-CE16/Syk/Zap70	8	0.0170213
BP	GO:0050679	positive regulation of epithelial cell proliferation	16/470	256/18913	0.0625	2.51503	3.89602	0.000707905	0.00722644	0.00506955	Apln/Ccl2/Ccl5/Cldn1/Esrp2/Hmox1/Il6/Mir101a/Mir146a/Mir27b/Mmp12/Nod2/Osr1/Tnf/Tnfaip3/Vegfa	16	0.0340426
BP	GO:0019216	regulation of lipid metabolic process	21/470	386/18913	0.0544041	2.18925	3.76847	0.000708933	0.00722644	0.00506955	Angptl4/Angptl8/C3/Ccdc3/Cidea/Clstn3/Dhh/Gpr146/Hcar2/Id2/Il1a/Il1b/Kcnma1/Mfsd2a/Npy1r/Ppargc1a/Ptgs2/Tnf/Tspo/Wnt4/Zfp69	21	0.0446809
BP	GO:0006874	intracellular calcium ion homeostasis	19/470	333/18913	0.0570571	2.296	3.80896	0.000714005	0.00723337	0.00507441	Atp7b/Bdkrb1/Bnip3/Ccl2/Ccl3/Ccl5/Cd40/Coro1a/Cx3cl1/Cxcl10/Ero1a/Grin1/Grm1/Hap1/Npy1r/P2ry6/Stc1/Stc2/Tgm2	19	0.0404255
BP	GO:0044703	multi-organism reproductive process	19/470	333/18913	0.0570571	2.296	3.80896	0.000714005	0.00723337	0.00507441	Adm/Arhgdib/Ccl2/Cyp1a1/Epor/Fosl1/Il1rn/Mapt/Mmp12/Mmp13/Mmp3/Mmp9/Ptgs2/Slc2a1/Sostdc1/Stc1/Stc2/Vegfa/Wnt4	19	0.0404255
BP	GO:0071384	cellular response to corticosteroid stimulus	11/470	139/18913	0.0791367	3.18449	4.1265	0.000714292	0.00723337	0.00507441	Ass1/Ccl2/Crhr2/Ddit4/Hey1/Il6/RT1-Bb/Serpina3n/Sstr2/Stc1/Vegfa	11	0.0234043
BP	GO:0042119	neutrophil activation	6/470	44/18913	0.136364	5.48733	4.7571	0.000722995	0.00730555	0.00512505	Ccl5/Cxcl6/Dnase1l3/Pla2g2a/Syk/Tnf	6	0.012766
BP	GO:0006835	dicarboxylic acid transport	10/470	118/18913	0.0847458	3.41021	4.19253	0.000726843	0.00732847	0.00514112	Adora2a/Grm1/Htr6/Il1b/Il1rn/Slc1a1/Slc1a2/Slc1a6/Slc26a9/Tnf	10	0.0212766
BP	GO:0008016	regulation of heart contraction	14/470	208/18913	0.0673077	2.70849	3.95519	0.000733022	0.00737475	0.00517359	Abcc9/Adm/Apln/Cacna1h/Crhr2/Dsc2/Gch1/Hopx/Nmu/Rgs4/Slc1a1/Stc1/Tnf/Zc3h12a	14	0.0297872
BP	GO:0051047	positive regulation of secretion	23/470	442/18913	0.0520362	2.09396	3.71509	0.000740807	0.00743693	0.00521721	Adora2a/Ankrd1/Ano1/Apln/Cacna1h/Cacna1i/Crhr2/Cyp19a1/Doc2a/Ffar4/Gipr/Gpr68/Hcar2/Htr6/Il1a/Il1b/Il6/Kcnn4/Mmp13/Nmu/Syk/Tlr2/Tnf	23	0.0489362
BP	GO:0046879	hormone secretion	22/470	415/18913	0.053012	2.13323	3.72632	0.000752469	0.00753769	0.0052879	Ano1/Apln/Ccl5/Crhr2/Cyp19a1/Ffar4/Fst/Gipr/Gnaz/Gpr68/Hcar2/Il1b/Il1rn/Il6/Nmu/Nos2/Npy1r/Pde1c/Sstr2/Stxbp5l/Tnf/Tspo	22	0.0468085
BP	GO:0030282	bone mineralization	11/470	140/18913	0.0785714	3.16175	4.0983	0.000758273	0.00757946	0.0053172	Adgrv1/Ccl3/Matn1/Mgp/Mmp13/Mtss1/Osr1/Phospho1/Ptgs2/Wnt10b/Wnt4	11	0.0234043
BP	GO:0006081	cellular aldehyde metabolic process	8/470	79/18913	0.101266	4.07498	4.37206	0.000763341	0.00761302	0.00534074	Abca4/Akr1b10/Aldh3a1/Cacna1h/Kcnma1/Kdm3a/Khk/Wnt4	8	0.0170213
BP	GO:0051955	regulation of amino acid transport	7/470	61/18913	0.114754	4.61775	4.5178	0.000766554	0.00761302	0.00534074	Adora2a/Grm1/Htr6/Il1b/Il1rn/Rgs4/Tnf	7	0.0148936
BP	GO:0061900	glial cell activation	7/470	61/18913	0.114754	4.61775	4.5178	0.000766554	0.00761302	0.00534074	Adora2a/Cx3cl1/Il1b/Kcnn4/Mt2A/Tlr2/Tnf	7	0.0148936
BP	GO:1903579	negative regulation of ATP metabolic process	5/470	30/18913	0.166667	6.70674	4.99361	0.00079108	0.0078398	0.00549984	Cbfa2t3/Ddit4/Ier3/Ppargc1a/Tspo	5	0.0106383
BP	GO:0048511	rhythmic process	22/470	417/18913	0.0527578	2.123	3.70177	0.000801387	0.00792501	0.00555962	Adora2a/Ass1/Atp7b/Bhlhe40/Car12/Csf2/Cyp19a1/Fbxl21/Grin1/Id2/Il6/Kcna2/Kcnma1/Mmp13/Ngfr/Nmu/Nos2/Notch4/Ntrk1/Pglyrp1/Ppargc1a/Tnf	22	0.0468085
BP	GO:0032735	positive regulation of interleukin-12 production	6/470	45/18913	0.133333	5.36539	4.68024	0.000816969	0.0080448	0.00564365	Cd40/Il12b/Irf8/Nod2/Syk/Tlr2	6	0.012766
BP	GO:0042745	circadian sleep/wake cycle	6/470	45/18913	0.133333	5.36539	4.68024	0.000816969	0.0080448	0.00564365	Adora2a/Csf2/Il6/Kcna2/Nmu/Pglyrp1	6	0.012766
BP	GO:0031214	biomineral tissue development	13/470	187/18913	0.0695187	2.79746	3.9433	0.000832683	0.00814764	0.00571579	Adgrv1/Ccl3/Hey1/Matn1/Mgp/Mmp13/Mtss1/Osr1/Otop1/Phospho1/Ptgs2/Wnt10b/Wnt4	13	0.0276596
BP	GO:0043534	blood vessel endothelial cell migration	13/470	187/18913	0.0695187	2.79746	3.9433	0.000832683	0.00814764	0.00571579	Card10/Cd40/Cxcr4/Hmox1/Mir101a/Mir146a/Mir221/Mir27b/Ptgs2/Tgfbr3/Thbs1/Tnf/Vegfa	13	0.0276596
BP	GO:0050728	negative regulation of inflammatory response	13/470	187/18913	0.0695187	2.79746	3.9433	0.000832683	0.00814764	0.00571579	Acp5/Adora2a/Cyp19a1/Ffar4/Ier3/Il12b/Mir146a/Mir221/Mir222/Nod2/Pglyrp1/Pla2g5/Tnfaip3	13	0.0276596
BP	GO:0045058	T cell selection	7/470	62/18913	0.112903	4.54327	4.46103	0.000845939	0.00825993	0.00579457	Batf/Cd28/Cd69/Il6/Jag2/Syk/Zap70	7	0.0148936
BP	GO:0002863	positive regulation of inflammatory response to antigenic stimulus	4/470	18/18913	0.222222	8.94232	5.38161	0.000873422	0.00847475	0.00594527	C3/Cd28/Fcgr2a/Tnf	4	0.00851064
BP	GO:0007252	I-kappaB phosphorylation	4/470	18/18913	0.222222	8.94232	5.38161	0.000873422	0.00847475	0.00594527	Cx3cl1/Mir27b/Tlr2/Tnf	4	0.00851064
BP	GO:0033080	immature T cell proliferation in thymus	4/470	18/18913	0.222222	8.94232	5.38161	0.000873422	0.00847475	0.00594527	Il1a/Il1b/Tnfrsf9/Wnt4	4	0.00851064
BP	GO:0007259	cell surface receptor signaling pathway via JAK-STAT	12/470	165/18913	0.0727273	2.92658	3.96783	0.000881779	0.00852886	0.00598323	Bcl3/Cd40/Csf2/Cxcl6/Dab1/Gbp7/Il12b/Il6/Mir146a/Mir221/Ret/Tnf	12	0.0255319
BP	GO:0051260	protein homooligomerization	14/470	212/18913	0.0660377	2.65739	3.87401	0.000882676	0.00852886	0.00598323	Kcna2/Kcna3/Kcna4/Kcna7/Kcnb2/Kcnc3/Kcng2/Kcnn4/Kctd11/Kctd16/Mapt/Slc1a2/Steap4/Tgm2	14	0.0297872
BP	GO:0043200	response to amino acid	17/470	287/18913	0.0592334	2.38358	3.7704	0.000889771	0.00857953	0.00601878	Ass1/Ccl2/Ccl5/Epor/Gria2/Grin1/Il6/Lcn2/Mir101a/Mir221/Mir222/Mmp3/Ppargc1a/Ptgs2/Rragd/Slc1a2/Tnf	17	0.0361702
BP	GO:0007188	adenylate cyclase-modulating G protein-coupled receptor signaling pathway	16/470	262/18913	0.0610687	2.45743	3.79218	0.000906008	0.00869993	0.00610324	Adcyap1r1/Adgre1/Adm/Adora2a/Adrb3/Crhr2/Cxcl10/Ffar4/Gipr/Gnaz/Gpr146/Grm1/Htr5b/Htr6/S1pr5/Sstr2	16	0.0340426
BP	GO:2001234	negative regulation of apoptotic signaling pathway	16/470	262/18913	0.0610687	2.45743	3.79218	0.000906008	0.00869993	0.00610324	Bdkrb2/Csf2/Cx3cl1/Higd1a/Hmox1/Ier3/Il1b/Mir146a/Mir221/Mir222/Mmp9/Ptgs2/Tnf/Tnfaip3/Vegfa/Wnt4	16	0.0340426
BP	GO:0060485	mesenchyme development	19/470	340/18913	0.0558824	2.24873	3.7091	0.000914557	0.00876387	0.0061481	Acta1/Acta2/Actg2/Frzb/Hey1/Heyl/Il1b/Il6/Mir221/Mir222/Notch4/Nrtn/Osr1/Ret/Tcf15/Tgfbr3/Thbs1/Vegfa/Wnt4	19	0.0404255
BP	GO:0042634	regulation of hair cycle	5/470	31/18913	0.16129	6.49039	4.88385	0.000924163	0.00881948	0.00618711	Fst/Hpse/Ngfr/Tnf/Wnt10b	5	0.0106383
BP	GO:0070498	interleukin-1-mediated signaling pathway	5/470	31/18913	0.16129	6.49039	4.88385	0.000924163	0.00881948	0.00618711	Il1b/Il1rn/Il6/Mir146a/Nfkbia	5	0.0106383
BP	GO:0050709	negative regulation of protein secretion	9/470	101/18913	0.0891089	3.58578	4.15946	0.000926563	0.00882423	0.00619044	Crhr2/Gnaz/Il12b/Il1b/Mir146a/Pde1c/Rhbdf2/Rsad2/Stxbp5l	9	0.0191489
BP	GO:0090130	tissue migration	10/470	122/18913	0.0819672	3.2984	4.06567	0.000941599	0.00894905	0.00627801	Acta1/Acta2/Actg2/Coro1a/Epb41l4b/Mir221/Mir222/Mmp9/Ptprr/Tgfbr3	10	0.0212766
BP	GO:0031348	negative regulation of defense response	17/470	289/18913	0.0588235	2.36708	3.7386	0.000960346	0.00910856	0.0063899	Acp5/Adora2a/Cyp19a1/Ffar4/Ier3/Il12b/Mir146a/Mir221/Mir222/Mmp12/Nod2/Otop1/Pglyrp1/Pla2g5/RT1-CE16/Tnfaip3/Usp18	17	0.0361702
BP	GO:0001936	regulation of endothelial cell proliferation	13/470	190/18913	0.0684211	2.75329	3.87744	0.00096448	0.0091291	0.00640432	Apln/Ccl2/Hmox1/Il12b/Mir101a/Mir146a/Mir222/Mir27b/Ngfr/Pla2g2a/Thbs1/Tnf/Vegfa	13	0.0276596
BP	GO:0045669	positive regulation of osteoblast differentiation	8/470	82/18913	0.097561	3.9259	4.23868	0.000977621	0.00923464	0.00647835	Cebpd/Ffar4/Gdpd2/Hey1/Il6/Vegfa/Wnt10b/Wnt4	8	0.0170213
BP	GO:0009141	nucleoside triphosphate metabolic process	16/470	264/18913	0.0606061	2.43881	3.75821	0.000981729	0.00925459	0.00649235	Abcc9/Ak4/Aldoc/Cbfa2t3/Ddit4/Eno2/Gpi/Hk2/Hk3/Ier3/Myh3/Pfkp/Pgk1/Pgk1l1/Ppargc1a/Tspo	16	0.0340426
BP	GO:0001935	endothelial cell proliferation	14/470	215/18913	0.0651163	2.62031	3.81435	0.00101114	0.00951248	0.00667327	Apln/Ccl2/Hmox1/Il12b/Mir101a/Mir146a/Mir222/Mir27b/Ngfr/Nos2/Pla2g2a/Thbs1/Tnf/Vegfa	14	0.0297872
BP	GO:0002456	T cell mediated immunity	11/470	145/18913	0.0758621	3.05272	3.96102	0.00101331	0.00951362	0.00667406	Il12b/Il1b/Il6/Nfkbiz/Nod2/RT1-CE1/RT1-CE16/RT1-S3/Rsad2/Slfn2/Vsir	11	0.0234043
BP	GO:0045637	regulation of myeloid cell differentiation	15/470	240/18913	0.0625	2.51503	3.77069	0.00102805	0.00963251	0.00675747	Ccl3/Ccl5/Csf2/Csf3/Gpr68/Id2/Ikzf1/Il12b/Il34/Mir221/Mir222/Mturn/Nfkbia/Rbp1/Tnf	15	0.0319149
BP	GO:1903038	negative regulation of leukocyte cell-cell adhesion	12/470	168/18913	0.0714286	2.87432	3.89544	0.00103186	0.00963939	0.0067623	Adora2a/Ass1/Cd69/Dtx1/Mir146a/Mir221/Mir222/Pla2g5/RT1-Bb/Tnfrsf14/Vsir/Zc3h12a	12	0.0255319
BP	GO:0002474	antigen processing and presentation of peptide antigen via MHC class I	6/470	47/18913	0.12766	5.13708	4.53319	0.00103294	0.00963939	0.0067623	Fcgr2a/RT1-CE1/RT1-CE14/RT1-CE16/RT1-CE2/RT1-S3	6	0.012766
BP	GO:0097553	calcium ion transmembrane import into cytosol	13/470	192/18913	0.0677083	2.72461	3.83424	0.00106171	0.00988797	0.00693668	Adcyap1r1/Bdkrb1/Cacna1i/Ccl3/Coro1a/Cx3cl1/Cxcl10/Ero1a/Grin1/Grin2c/Hap1/Kcnn4/P2ry6	13	0.0276596
BP	GO:0042310	vasoconstriction	10/470	124/18913	0.0806452	3.2452	4.00419	0.00106704	0.00991534	0.00695588	Acta1/Acta2/Actg2/Adm/Apln/Bdkrb2/Cx3cl1/Faah/Npy1r/Ptgs2	10	0.0212766
BP	GO:0050995	negative regulation of lipid catabolic process	5/470	32/18913	0.15625	6.28757	4.77881	0.0010732	0.00991534	0.00695588	Cidea/Hcar2/Il1b/Mfsd2a/Tnf	5	0.0106383
BP	GO:0072170	metanephric tubule development	5/470	32/18913	0.15625	6.28757	4.77881	0.0010732	0.00991534	0.00695588	Anpep/Mtss1/Osr1/Slc2a5/Wnt4	5	0.0106383
BP	GO:2000353	positive regulation of endothelial cell apoptotic process	5/470	32/18913	0.15625	6.28757	4.77881	0.0010732	0.00991534	0.00695588	Ccl2/Cd40/Mir101a/Thbs1/Tnf	5	0.0106383
BP	GO:0002827	positive regulation of T-helper 1 type immune response	4/470	19/18913	0.210526	8.47167	5.20157	0.00108477	0.00998249	0.00700299	Il12b/Il1b/RT1-Bb/Slc11a1	4	0.00851064
BP	GO:0033079	immature T cell proliferation	4/470	19/18913	0.210526	8.47167	5.20157	0.00108477	0.00998249	0.00700299	Il1a/Il1b/Tnfrsf9/Wnt4	4	0.00851064
BP	GO:1901292	nucleoside phosphate catabolic process	13/470	193/18913	0.0673575	2.71049	3.81285	0.00111332	0.0102249	0.00717302	Aldoc/Cbfa2t3/Ddit4/Eno2/Gpi/Hk2/Hk3/Ier3/Pfkp/Pgk1/Pgk1l1/Ppargc1a/Upp1	13	0.0276596
BP	GO:0009914	hormone transport	22/470	428/18913	0.0514019	2.06843	3.56912	0.00112267	0.0102582	0.00719644	Ano1/Apln/Ccl5/Crhr2/Cyp19a1/Ffar4/Fst/Gipr/Gnaz/Gpr68/Hcar2/Il1b/Il1rn/Il6/Nmu/Nos2/Npy1r/Pde1c/Sstr2/Stxbp5l/Tnf/Tspo	22	0.0468085
BP	GO:0044706	multi-multicellular organism process	19/470	346/18913	0.0549133	2.20973	3.62543	0.00112317	0.0102582	0.00719644	Adm/Arhgdib/Ccl2/Cyp1a1/Epor/Fosl1/Il1rn/Mapt/Mmp12/Mmp13/Mmp3/Mmp9/Ptgs2/Slc2a1/Sostdc1/Stc1/Stc2/Vegfa/Wnt4	19	0.0404255
BP	GO:0050873	brown fat cell differentiation	7/470	65/18913	0.107692	4.33358	4.29771	0.00112359	0.0102582	0.00719644	Adrb3/Bnip3/Ero1a/Fabp4/Ffar4/Lamb3/Ptgs2	7	0.0148936
BP	GO:0099505	regulation of presynaptic membrane potential	6/470	48/18913	0.125	5.03005	4.46277	0.00115612	0.0105346	0.00739028	Gria2/Grin1/Kcna2/Kcna4/Kcnma1/Kctd16	6	0.012766
BP	GO:0045664	regulation of neuron differentiation	15/470	243/18913	0.0617284	2.48398	3.71672	0.00116454	0.0105905	0.00742949	Ccl5/Dab1/Dtx1/Gdf5/Hes3/Hey1/Heyl/Id2/Il1b/Il6/Kctd11/Ngfr/Ret/Rgs6/S1pr5	15	0.0319149
BP	GO:0060047	heart contraction	15/470	244/18913	0.0614754	2.4738	3.69891	0.0012133	0.0110123	0.00772542	Abcc9/Adm/Apln/Cacna1h/Crhr2/Cxcr4/Dsc2/Gch1/Hopx/Nmu/Rgs4/Slc1a1/Stc1/Tnf/Zc3h12a	15	0.0319149
BP	GO:0048662	negative regulation of smooth muscle cell proliferation	8/470	85/18913	0.0941176	3.78733	4.11148	0.00123754	0.0111829	0.00784513	Apln/Cnn1/Hmox1/Il12b/Ndrg2/Ppargc1a/Rgs5/Tnfaip3	8	0.0170213
BP	GO:0043278	response to morphine	5/470	33/18913	0.151515	6.09703	4.67816	0.00123933	0.0111829	0.00784513	Ccl5/Grin1/Npy1r/RT1-Bb/Slc1a1	5	0.0106383
BP	GO:0090594	inflammatory response to wounding	5/470	33/18913	0.151515	6.09703	4.67816	0.00123933	0.0111829	0.00784513	Hmox1/Il1a/Il6/Nfkbiz/Tnf	5	0.0106383
BP	GO:0016064	immunoglobulin mediated immune response	11/470	149/18913	0.0738255	2.97077	3.85539	0.00126501	0.0113924	0.0079921	Batf/Bcl3/C1s/C3/Cd28/Cd40/Fcgr2a/Nfkbiz/Nod2/RT1-Bb/Tnf	11	0.0234043
BP	GO:0032963	collagen metabolic process	10/470	127/18913	0.0787402	3.16854	3.91429	0.00128054	0.01151	0.00807456	Ccl2/Il6/Mmp12/Mmp13/Mmp3/Mmp9/P3h2/Tgfbr3/Vsir/Wnt4	10	0.0212766
BP	GO:0050890	cognition	21/470	405/18913	0.0518519	2.08654	3.52854	0.00129632	0.0116293	0.00815826	Aph1b/Chrna4/Clstn3/Fosl1/Foxo6/Gpi/Grin1/Grpr/Htr6/Il1b/Il1rn/Itga8/Lcn2/Mapt/Mfsd2a/Nrxn2/Ntrk1/Ptgs2/Ptprz1/Slc1a1/Tlr2	21	0.0446809
BP	GO:2001237	negative regulation of extrinsic apoptotic signaling pathway	9/470	106/18913	0.0849057	3.41664	3.98297	0.00130704	0.0116865	0.00819838	Csf2/Cx3cl1/Hmox1/Il1b/Mir221/Mir222/Tnf/Tnfaip3/Vegfa	9	0.0191489
BP	GO:1904062	regulation of monoatomic cation transmembrane transport	20/470	378/18913	0.0529101	2.12912	3.53991	0.00131811	0.0116865	0.00819838	Abcc9/Adcyap1r1/Bdkrb1/Chrna4/Coro1a/Cx3cl1/Cxcl10/Fgf11/Grin1/Grin2c/Hap1/Kcnmb1/Kcnn4/Lcn2/Mmp9/Osr1/P2ry6/Rgs4/Rgs9/Stac2	20	0.0425532
BP	GO:0014823	response to activity	12/470	173/18913	0.0693642	2.79124	3.77829	0.00132892	0.0116865	0.00819838	Abcc9/Adss1/Ccl2/Ccl5/Cxcr4/Il1rn/Il6/Mir27b/Myh2/Nos2/Ppargc1a/Tnf	12	0.0255319
BP	GO:0031644	regulation of nervous system process	12/470	173/18913	0.0693642	2.79124	3.77829	0.00132892	0.0116865	0.00819838	Ccl3/Chrna4/Dlgap2/Grin1/Grin2c/Grm1/Il6/Ngfr/Nmu/Nrxn2/Rgs4/Tnf	12	0.0255319
BP	GO:0072523	purine-containing compound catabolic process	12/470	173/18913	0.0693642	2.79124	3.77829	0.00132892	0.0116865	0.00819838	Aldoc/Cbfa2t3/Ddit4/Eno2/Gpi/Hk2/Hk3/Ier3/Pfkp/Pgk1/Pgk1l1/Ppargc1a	12	0.0255319
BP	GO:0032695	negative regulation of interleukin-12 production	4/470	20/18913	0.2	8.04809	5.03428	0.00132956	0.0116865	0.00819838	Acp5/Nod2/Thbs1/Tlr2	4	0.00851064
BP	GO:0036005	response to macrophage colony-stimulating factor	4/470	20/18913	0.2	8.04809	5.03428	0.00132956	0.0116865	0.00819838	Acp5/Ccl2/Tlr2/Tnf	4	0.00851064
BP	GO:0045837	negative regulation of membrane potential	4/470	20/18913	0.2	8.04809	5.03428	0.00132956	0.0116865	0.00819838	Bnip3/Il1rn/Il6/Mapt	4	0.00851064
BP	GO:1902033	regulation of hematopoietic stem cell proliferation	4/470	20/18913	0.2	8.04809	5.03428	0.00132956	0.0116865	0.00819838	Cxcl1/Mir221/Mir222/Wnt10b	4	0.00851064
BP	GO:1903588	negative regulation of blood vessel endothelial cell proliferation involved in sprouting angiogenesis	4/470	20/18913	0.2	8.04809	5.03428	0.00132956	0.0116865	0.00819838	Il12b/Mir222/Ngfr/Thbs1	4	0.00851064
BP	GO:0007566	embryo implantation	8/470	86/18913	0.0930233	3.7433	4.07036	0.00133545	0.0116865	0.00819838	Arhgdib/Mmp12/Mmp9/Ptgs2/Sostdc1/Stc1/Stc2/Vegfa	8	0.0170213
BP	GO:0032729	positive regulation of type II interferon production	8/470	86/18913	0.0930233	3.7433	4.07036	0.00133545	0.0116865	0.00819838	Bcl3/Il12b/Il1b/Irf8/RT1-CE16/Slc11a1/Ticam2/Tnf	8	0.0170213
BP	GO:2000379	positive regulation of reactive oxygen species metabolic process	8/470	86/18913	0.0930233	3.7433	4.07036	0.00133545	0.0116865	0.00819838	Cxcl1/Grin1/Lcn2/Mapt/Syk/Thbs1/Tspo/Zc3h12a	8	0.0170213
BP	GO:0002286	T cell activation involved in immune response	10/470	128/18913	0.078125	3.14378	3.88492	0.00135899	0.0118477	0.00831151	Batf/Bcl3/Cd69/Il12b/Il6/Nfkbiz/RT1-DMb/Slc11a1/Slfn2/Zc3h12a	10	0.0212766
BP	GO:0015837	amine transport	10/470	128/18913	0.078125	3.14378	3.88492	0.00135899	0.0118477	0.00831151	Adora2a/Chrna4/Crhr2/Grm1/Htr6/Il1b/Il1rn/Kcna2/Rgs4/Tnf	10	0.0212766
BP	GO:0002706	regulation of lymphocyte mediated immunity	14/470	222/18913	0.0630631	2.53768	3.679	0.00137311	0.0119483	0.00838209	C3/Cd28/Cd40/Fcgr2a/Il12b/Il1b/Il6/Nod2/RT1-CE1/RT1-CE16/RT1-S3/Rsad2/Tnf/Vsir	14	0.0297872
BP	GO:0048638	regulation of developmental growth	21/470	407/18913	0.0515971	2.07629	3.50406	0.00137737	0.011963	0.00839239	Adrb3/C3/Cpne5/Csf2/Cxcr4/Dcx/Gdf5/Hopx/Ikzf1/Mapt/Mfsd2a/Mir222/Npy1r/Ntn1/Rgs4/Slit1/Stc2/Syt17/Tgfbr3/Vegfa/Wwc1	21	0.0446809
BP	GO:0015813	L-glutamate transmembrane transport	5/470	34/18913	0.147059	5.91771	4.58157	0.00142372	0.0123151	0.00863941	Grm1/Slc1a1/Slc1a2/Slc1a6/Tnf	5	0.0106383
BP	GO:1900543	negative regulation of purine nucleotide metabolic process	5/470	34/18913	0.147059	5.91771	4.58157	0.00142372	0.0123151	0.00863941	Cbfa2t3/Ddit4/Ier3/Ppargc1a/Tspo	5	0.0106383
BP	GO:0060538	skeletal muscle organ development	15/470	248/18913	0.0604839	2.4339	3.62854	0.00142588	0.0123151	0.00863941	Abcc9/Acta1/Ankrd1/Ass1/Ckmt1/Cntfr/Col19a1/Crhr2/Des/Ero1a/Heyl/Klhl40/Maff/Ngfr/Wnt10b	15	0.0319149
BP	GO:0002714	positive regulation of B cell mediated immunity	6/470	50/18913	0.12	4.82885	4.32763	0.00143593	0.012333	0.00865197	C3/Cd28/Cd40/Fcgr2a/Nod2/Tnf	6	0.012766
BP	GO:0002891	positive regulation of immunoglobulin mediated immune response	6/470	50/18913	0.12	4.82885	4.32763	0.00143593	0.012333	0.00865197	C3/Cd28/Cd40/Fcgr2a/Nod2/Tnf	6	0.012766
BP	GO:1905521	regulation of macrophage migration	6/470	50/18913	0.12	4.82885	4.32763	0.00143593	0.012333	0.00865197	Ccl2/Ccl5/Cx3cl1/Cyp19a1/Il34/Thbs1	6	0.012766
BP	GO:0150076	neuroinflammatory response	8/470	87/18913	0.091954	3.70027	4.02986	0.00143943	0.0123402	0.008657	Adora2a/Cx3cl1/Il1b/Kcnn4/Mt2A/Ptgs2/Tlr2/Tnf	8	0.0170213
BP	GO:0141060	disruption of anatomical structure in another organism	7/470	68/18913	0.102941	4.1424	4.144	0.00146811	0.0125629	0.0088132	Cxcl1/Cxcl14/Cxcl6/Gbp7/Nos2/Pla2g2a/Syk	7	0.0148936
BP	GO:0042113	B cell activation	17/470	301/18913	0.0564784	2.27272	3.5532	0.00149186	0.0127426	0.0089393	Batf/Bcl3/C3/Cd28/Cd40/Chrna4/Id2/Ikzf1/Il6/Irf8/Nfkbiz/Nod2/Ntrk1/RT1-Bb/Syk/Tnfaip3/Vav3	17	0.0361702
BP	GO:0042752	regulation of circadian rhythm	10/470	130/18913	0.0769231	3.09542	3.82703	0.00152763	0.0130242	0.00913681	Adora2a/Bhlhe40/Csf2/Fbxl21/Id2/Il6/Kcna2/Nmu/Pglyrp1/Ppargc1a	10	0.0212766
BP	GO:1902475	L-alpha-amino acid transmembrane transport	8/470	88/18913	0.0909091	3.65822	3.98994	0.00154972	0.0131883	0.00925194	Grm1/Rgs4/Slc11a1/Slc1a1/Slc1a2/Slc1a6/Slc6a7/Tnf	8	0.0170213
BP	GO:0019724	B cell mediated immunity	11/470	153/18913	0.0718954	2.8931	3.75323	0.00156597	0.0133021	0.0093318	Batf/Bcl3/C1s/C3/Cd28/Cd40/Fcgr2a/Nfkbiz/Nod2/RT1-Bb/Tnf	11	0.0234043
BP	GO:0002676	regulation of chronic inflammatory response	3/470	10/18913	0.3	12.0721	5.59072	0.00160642	0.0133993	0.00939998	Cyp19a1/Tnf/Tnfaip3	3	0.00638298
BP	GO:0010749	regulation of nitric oxide mediated signal transduction	3/470	10/18913	0.3	12.0721	5.59072	0.00160642	0.0133993	0.00939998	Gucy1a1/Thbs1/Vegfa	3	0.00638298
BP	GO:0019511	peptidyl-proline hydroxylation	3/470	10/18913	0.3	12.0721	5.59072	0.00160642	0.0133993	0.00939998	Ero1a/P3h2/P4ha2	3	0.00638298
BP	GO:0036018	cellular response to erythropoietin	3/470	10/18913	0.3	12.0721	5.59072	0.00160642	0.0133993	0.00939998	Cd40/Epor/Mt2A	3	0.00638298
BP	GO:0038060	nitric oxide-cGMP-mediated signaling	3/470	10/18913	0.3	12.0721	5.59072	0.00160642	0.0133993	0.00939998	Gucy1a1/Gucy1b1/Thbs1	3	0.00638298
BP	GO:0051712	positive regulation of killing of cells of another organism	3/470	10/18913	0.3	12.0721	5.59072	0.00160642	0.0133993	0.00939998	Cxcl1/Nos2/Syk	3	0.00638298
BP	GO:0070778	L-aspartate transmembrane transport	3/470	10/18913	0.3	12.0721	5.59072	0.00160642	0.0133993	0.00939998	Slc1a1/Slc1a2/Slc1a6	3	0.00638298
BP	GO:0071314	cellular response to cocaine	3/470	10/18913	0.3	12.0721	5.59072	0.00160642	0.0133993	0.00939998	Slc1a1/Slc1a2/Tgm2	3	0.00638298
BP	GO:1901031	regulation of response to reactive oxygen species	3/470	10/18913	0.3	12.0721	5.59072	0.00160642	0.0133993	0.00939998	Adcyap1r1/Epor/Gch1	3	0.00638298
BP	GO:2000425	regulation of apoptotic cell clearance	3/470	10/18913	0.3	12.0721	5.59072	0.00160642	0.0133993	0.00939998	C3/Ccl2/Tgm2	3	0.00638298
BP	GO:0002577	regulation of antigen processing and presentation	4/470	21/18913	0.190476	7.66484	4.87823	0.00161045	0.0133993	0.00939998	Nod2/RT1-Bb/Slc11a1/Thbs1	4	0.00851064
BP	GO:0051235	maintenance of location	19/470	357/18913	0.0532213	2.14165	3.47637	0.00161208	0.0133993	0.00939998	Atp7b/Bdkrb1/C3/Ccl3/Cidea/Clstn3/Coro1a/Cx3cl1/Cxcl10/Ero1a/Hap1/Hk2/Il1b/Mir146a/Nfkbia/P2ry6/Tnf/Tspo/Zc3h12a	19	0.0404255
BP	GO:0010893	positive regulation of steroid biosynthetic process	5/470	35/18913	0.142857	5.74863	4.48876	0.00162755	0.0134556	0.00943947	Il1a/Npy1r/Ppargc1a/Tnf/Wnt4	5	0.0106383
BP	GO:0014072	response to isoquinoline alkaloid	5/470	35/18913	0.142857	5.74863	4.48876	0.00162755	0.0134556	0.00943947	Ccl5/Grin1/Npy1r/RT1-Bb/Slc1a1	5	0.0106383
BP	GO:2000406	positive regulation of T cell migration	5/470	35/18913	0.142857	5.74863	4.48876	0.00162755	0.0134556	0.00943947	Ccl20/Ccl5/Coro1a/Cxcl10/Tnfrsf14	5	0.0106383
BP	GO:0051145	smooth muscle cell differentiation	8/470	89/18913	0.0898876	3.61712	3.95061	0.00166661	0.013754	0.00964879	Adm/C3/Hey1/Itga8/Mir221/Notch4/Vegfa/Wnt4	8	0.0170213
BP	GO:0072073	kidney epithelium development	12/470	178/18913	0.0674157	2.71284	3.66523	0.00169345	0.0139507	0.00978678	Anpep/Crlf1/Hey1/Heyl/Mtss1/Osr1/Podxl/Prom1/Ret/Slc2a5/Vegfa/Wnt4	12	0.0255319
BP	GO:0044344	cellular response to fibroblast growth factor stimulus	10/470	132/18913	0.0757576	3.04852	3.77024	0.00171287	0.0140727	0.00987239	Apln/Ccl2/Ccl5/Cyp19a1/Fgf16/Mir146a/Ngfr/Thbs1/Vegfa/Wnt4	10	0.0212766
BP	GO:0055074	calcium ion homeostasis	19/470	359/18913	0.0529248	2.12972	3.44985	0.00171802	0.0140727	0.00987239	Atp7b/Bdkrb1/Bnip3/Ccl2/Ccl3/Ccl5/Cd40/Coro1a/Cx3cl1/Cxcl10/Ero1a/Grin1/Grm1/Hap1/Npy1r/P2ry6/Stc1/Stc2/Tgm2	19	0.0404255
BP	GO:0046434	organophosphate catabolic process	15/470	253/18913	0.0592885	2.3858	3.54247	0.00173475	0.0140727	0.00987239	Aldoc/Cbfa2t3/Ddit4/Eno2/Gpi/Hk2/Hk3/Ier3/Pfkp/Pgk1/Pgk1l1/Pla2g5/Pla2g7/Ppargc1a/Upp1	15	0.0319149
BP	GO:0090276	regulation of peptide hormone secretion	16/470	279/18913	0.0573477	2.30769	3.51283	0.00173994	0.0140727	0.00987239	Ano1/Apln/Ccl5/Crhr2/Ffar4/Gipr/Gnaz/Gpr68/Il1b/Il6/Nmu/Nos2/Pde1c/Sstr2/Stxbp5l/Tnf	16	0.0340426
BP	GO:0002534	cytokine production involved in inflammatory response	7/470	70/18913	0.1	4.02404	4.04635	0.00174005	0.0140727	0.00987239	Il17f/Il6/Mir146a/Nod2/Nos2/Tnf/Zc3h12a	7	0.0148936
BP	GO:0002886	regulation of myeloid leukocyte mediated immunity	7/470	70/18913	0.1	4.02404	4.04635	0.00174005	0.0140727	0.00987239	C3/Cxcl1/Cxcl6/Dnase1l3/Fcgr2a/Hmox1/Syk	7	0.0148936
BP	GO:0043124	negative regulation of canonical NF-kappaB signal transduction	7/470	70/18913	0.1	4.02404	4.04635	0.00174005	0.0140727	0.00987239	Coro1a/Mir146a/Nfkbia/Tgfbr3/Tnfaip3/Tnip3/Zc3h12a	7	0.0148936
BP	GO:0071869	response to catecholamine	7/470	70/18913	0.1	4.02404	4.04635	0.00174005	0.0140727	0.00987239	Htr6/Il1rn/Ppargc1a/Rgs4/Rgs9/Slc1a1/Tgm2	7	0.0148936
BP	GO:1900015	regulation of cytokine production involved in inflammatory response	7/470	70/18913	0.1	4.02404	4.04635	0.00174005	0.0140727	0.00987239	Il17f/Il6/Mir146a/Nod2/Nos2/Tnf/Zc3h12a	7	0.0148936
BP	GO:2000351	regulation of endothelial cell apoptotic process	7/470	70/18913	0.1	4.02404	4.04635	0.00174005	0.0140727	0.00987239	Angptl4/Ccl2/Cd40/Mir101a/Thbs1/Tnf/Tnfaip3	7	0.0148936
BP	GO:0007517	muscle organ development	20/470	387/18913	0.0516796	2.07961	3.42557	0.00174164	0.0140727	0.00987239	Abcc9/Acta1/Ankrd1/Ass1/Ckmt1/Cntfr/Col19a1/Crhr2/Des/Egln1/Ero1a/Hey1/Heyl/Il6/Klhl40/Maff/Ngfr/Tcf15/Tgfbr3/Wnt10b	20	0.0425532
BP	GO:0050777	negative regulation of immune response	13/470	203/18913	0.0640394	2.57697	3.6061	0.00175474	0.0141538	0.00992931	Cd69/Il12b/Mmp12/Nod2/Otop1/Pglyrp1/Pglyrp2/RT1-CE16/Tnfaip3/Tnfrsf14/Usp18/Vsir/Zc3h12a	13	0.0276596
BP	GO:0007611	learning or memory	19/470	360/18913	0.0527778	2.1238	3.43665	0.00177317	0.0142777	0.0100162	Aph1b/Clstn3/Fosl1/Foxo6/Gpi/Grin1/Grpr/Htr6/Il1b/Il1rn/Itga8/Lcn2/Mapt/Nrxn2/Ntrk1/Ptgs2/Ptprz1/Slc1a1/Tlr2	19	0.0404255
BP	GO:0050769	positive regulation of neurogenesis	18/470	333/18913	0.0540541	2.17516	3.4538	0.00178662	0.0143611	0.0100747	Cx3cl1/Cxcr4/Dcx/Hap1/Id2/Il1b/Il34/Il6/Mapt/Mir221/Mir222/Ntn1/Ptprz1/Tgm2/Tlr2/Tnf/Tspo/Vegfa	18	0.0382979
BP	GO:1903707	negative regulation of hemopoiesis	10/470	133/18913	0.075188	3.0256	3.74225	0.00181208	0.0145405	0.0102006	Ccl3/Cd69/Dtx1/Gpr68/Id2/Mir221/Mir222/Pglyrp1/Pglyrp2/Zc3h12a	10	0.0212766
BP	GO:0016525	negative regulation of angiogenesis	11/470	156/18913	0.0705128	2.83747	3.67876	0.00182817	0.0146322	0.0102649	Ccl2/Crhr2/Cxcl10/Il17f/Mir146a/Mir221/Mir222/Ngfr/Pgk1/Thbs1/Tnf	11	0.0234043
BP	GO:0042593	glucose homeostasis	19/470	361/18913	0.0526316	2.11792	3.4235	0.00182981	0.0146322	0.0102649	Ano1/Ccl2/Crhr2/Cyp19a1/Gpi/Gpr68/Hk2/Hk3/Il1b/Il6/Mir146a/Mir221/Mir222/Ngfr/Pde1c/Ppargc1a/Ppp1r3g/Pygl/Stxbp5l	19	0.0404255
BP	GO:0006909	phagocytosis	14/470	229/18913	0.0611354	2.46011	3.54872	0.00183756	0.0146688	0.0102906	C3/Ccl2/Coro1a/Fcgr2a/Irf8/Nod2/P2ry6/Pla2g5/Slc11a1/Syk/Tgm2/Thbs1/Ticam2/Tlr2	14	0.0297872
BP	GO:0001516	prostaglandin biosynthetic process	5/470	36/18913	0.138889	5.58895	4.39946	0.00185201	0.0146832	0.0103006	Akr1c15/Bdkrb1/Il1b/Pla2g2a/Ptgs2	5	0.0106383
BP	GO:0002719	negative regulation of cytokine production involved in immune response	5/470	36/18913	0.138889	5.58895	4.39946	0.00185201	0.0146832	0.0103006	Acp5/Hmox1/Nod2/Tnf/Vsir	5	0.0106383
BP	GO:0009595	detection of biotic stimulus	5/470	36/18913	0.138889	5.58895	4.39946	0.00185201	0.0146832	0.0103006	Nod2/Pglyrp1/Pglyrp2/Tlr2/Tspo	5	0.0106383
BP	GO:0046457	prostanoid biosynthetic process	5/470	36/18913	0.138889	5.58895	4.39946	0.00185201	0.0146832	0.0103006	Akr1c15/Bdkrb1/Il1b/Pla2g2a/Ptgs2	5	0.0106383
BP	GO:0003015	heart process	15/470	255/18913	0.0588235	2.36708	3.50861	0.00187303	0.0148245	0.0103998	Abcc9/Adm/Apln/Cacna1h/Crhr2/Cxcr4/Dsc2/Gch1/Hopx/Nmu/Rgs4/Slc1a1/Stc1/Tnf/Zc3h12a	15	0.0319149
BP	GO:0033500	carbohydrate homeostasis	19/470	362/18913	0.0524862	2.11207	3.41038	0.00188797	0.0149072	0.0104578	Ano1/Ccl2/Crhr2/Cyp19a1/Gpi/Gpr68/Hk2/Hk3/Il1b/Il6/Mir146a/Mir221/Mir222/Ngfr/Pde1c/Ppargc1a/Ppp1r3g/Pygl/Stxbp5l	19	0.0404255
BP	GO:0070741	response to interleukin-6	7/470	71/18913	0.0985915	3.96737	3.99888	0.00188991	0.0149072	0.0104578	Ccl2/Chi3l1/Il6/Lcn2/Mir146a/Ppargc1a/Serpina3n	7	0.0148936
BP	GO:0051345	positive regulation of hydrolase activity	20/470	390/18913	0.0512821	2.06361	3.38814	0.00190633	0.0150112	0.0105307	Aph1b/Ccl5/Dapk1/Egln3/Mir27b/Ngfr/Ntrk1/Pla2g5/Rasgrf1/Ret/Rgs4/Rgs6/Slc1a1/Syk/Tbc1d30/Tgm2/Tnf/Tnfsf15/Vsir/Wnt4	20	0.0425532
BP	GO:0033555	multicellular organismal response to stress	10/470	134/18913	0.0746269	3.00302	3.71452	0.00191588	0.015052	0.0105594	Acp5/Adcyap1r1/Gch1/Grpr/Morc1/Ntrk1/Ret/Slc1a1/Thbs1/Tspo	10	0.0212766
BP	GO:0002709	regulation of T cell mediated immunity	9/470	112/18913	0.0803571	3.23361	3.78466	0.00192005	0.015052	0.0105594	Il12b/Il1b/Il6/Nod2/RT1-CE1/RT1-CE16/RT1-S3/Rsad2/Vsir	9	0.0191489
BP	GO:0002720	positive regulation of cytokine production involved in immune response	8/470	91/18913	0.0879121	3.53762	3.87361	0.00192126	0.015052	0.0105594	Il1b/Il6/Nod2/RT1-CE16/Rsad2/Syk/Tlr2/Tnfrsf14	8	0.0170213
BP	GO:0051770	positive regulation of nitric-oxide synthase biosynthetic process	4/470	22/18913	0.181818	7.31644	4.73215	0.00193006	0.0150701	0.0105721	Ccl2/Ccl20/Nod2/Tlr2	4	0.00851064
BP	GO:1905709	negative regulation of membrane permeability	4/470	22/18913	0.181818	7.31644	4.73215	0.00193006	0.0150701	0.0105721	Bnip3/Hk2/Ier3/Mir146a	4	0.00851064
BP	GO:0002920	regulation of humoral immune response	6/470	53/18913	0.113208	4.55552	4.13782	0.00194884	0.015117	0.010605	C3/Evpl/Il17f/Il1b/Nod2/Tnf	6	0.012766
BP	GO:0017158	regulation of calcium ion-dependent exocytosis	6/470	53/18913	0.113208	4.55552	4.13782	0.00194884	0.015117	0.010605	Cacna1h/Cacna1i/Doc2a/Sptbn2/Syt15/Syt17	6	0.012766
BP	GO:2000404	regulation of T cell migration	6/470	53/18913	0.113208	4.55552	4.13782	0.00194884	0.015117	0.010605	Ccl20/Ccl5/Cd69/Coro1a/Cxcl10/Tnfrsf14	6	0.012766
BP	GO:0045667	regulation of osteoblast differentiation	12/470	181/18913	0.0662983	2.66787	3.59925	0.00194911	0.015117	0.010605	Cebpd/Ffar4/Gdpd2/Hey1/Id2/Il6/Mir221/Mir222/Tnf/Vegfa/Wnt10b/Wnt4	12	0.0255319
BP	GO:0040013	negative regulation of locomotion	21/470	419/18913	0.0501193	2.01682	3.36	0.00196047	0.0151797	0.010649	Arhgdib/Card10/Ccl2/Cd69/Cx3cl1/Cyp19a1/Frmd5/Il1rn/Mir101a/Mir146a/Mir221/Mir222/Ngfr/Ppargc1a/Ptprr/Slit1/Stc1/Tgfbr3/Thbs1/Tnf/Wnt4	21	0.0446809
BP	GO:0007565	female pregnancy	17/470	309/18913	0.0550162	2.21387	3.43441	0.00196965	0.0152254	0.010681	Adm/Arhgdib/Ccl2/Epor/Fosl1/Il1rn/Mapt/Mmp12/Mmp3/Mmp9/Ptgs2/Slc2a1/Sostdc1/Stc1/Stc2/Vegfa/Wnt4	17	0.0361702
BP	GO:0001667	ameboidal-type cell migration	16/470	283/18913	0.0565371	2.27508	3.45005	0.00200987	0.0155104	0.010881	Abcc9/Acta2/Arhgdib/Coro1a/Epb41l4b/Mesp2/Mir221/Mir222/Mmp12/Mmp9/Nrtn/Ptprr/Ret/Tgfbr3/Thbs1/Vegfa	16	0.0340426
BP	GO:0010043	response to zinc ion	7/470	72/18913	0.0972222	3.91226	3.95227	0.00204958	0.0157906	0.0110776	Acp5/Ass1/Atp7b/Khk/Mt1/Mt2A/Tspo	7	0.0148936
BP	GO:0002791	regulation of peptide secretion	16/470	284/18913	0.056338	2.26707	3.43452	0.00208256	0.0159916	0.0112186	Ano1/Apln/Ccl5/Crhr2/Ffar4/Gipr/Gnaz/Gpr68/Il1b/Il6/Nmu/Nos2/Pde1c/Sstr2/Stxbp5l/Tnf	16	0.0340426
BP	GO:0090087	regulation of peptide transport	16/470	284/18913	0.056338	2.26707	3.43452	0.00208256	0.0159916	0.0112186	Ano1/Apln/Ccl5/Crhr2/Ffar4/Gipr/Gnaz/Gpr68/Il1b/Il6/Nmu/Nos2/Pde1c/Sstr2/Stxbp5l/Tnf	16	0.0340426
BP	GO:0072207	metanephric epithelium development	5/470	37/18913	0.135135	5.4379	4.31345	0.00209831	0.0160594	0.0112661	Anpep/Mtss1/Osr1/Slc2a5/Wnt4	5	0.0106383
BP	GO:1903715	regulation of aerobic respiration	5/470	37/18913	0.135135	5.4379	4.31345	0.00209831	0.0160594	0.0112661	Ak4/Bnip3/Cbfa2t3/Cimap2/Tnf	5	0.0106383
BP	GO:0010950	positive regulation of endopeptidase activity	11/470	159/18913	0.0691824	2.78393	3.60604	0.00212511	0.0162377	0.0113912	Aph1b/Dapk1/Egln3/Mir27b/Ngfr/Ret/Slc1a1/Syk/Tnf/Tnfsf15/Vsir	11	0.0234043
BP	GO:0045429	positive regulation of nitric oxide biosynthetic process	6/470	54/18913	0.111111	4.47116	4.07769	0.0021473	0.0163802	0.0114912	Ass1/Il1b/Il6/Ptgs2/Tlr2/Tnf	6	0.012766
BP	GO:0002579	positive regulation of antigen processing and presentation	3/470	11/18913	0.272727	10.9747	5.28254	0.00216828	0.0164321	0.0115276	Nod2/RT1-Bb/Slc11a1	3	0.00638298
BP	GO:0002604	regulation of dendritic cell antigen processing and presentation	3/470	11/18913	0.272727	10.9747	5.28254	0.00216828	0.0164321	0.0115276	Nod2/Slc11a1/Thbs1	3	0.00638298
BP	GO:0002784	regulation of antimicrobial peptide production	3/470	11/18913	0.272727	10.9747	5.28254	0.00216828	0.0164321	0.0115276	Evpl/Il17f/Nod2	3	0.00638298
BP	GO:0018894	dibenzo-p-dioxin metabolic process	3/470	11/18913	0.272727	10.9747	5.28254	0.00216828	0.0164321	0.0115276	Ccl5/Cyp19a1/Cyp1a1	3	0.00638298
BP	GO:0002757	immune response-activating signaling pathway	23/470	480/18913	0.0479167	1.92819	3.28821	0.00217735	0.016474	0.011557	C3/Cd28/Fcgr2a/Fcho1/Fosl1/Kcnn4/Mir146a/Nfkbia/Nfkbiz/Nod2/Oasl/RT1-Bb/RT1-CE16/Rsad2/Syk/Ticam2/Tlr2/Tnf/Tnfaip3/Tnip3/Vav3/Zap70/Zc3h12a	23	0.0489362
BP	GO:0071867	response to monoamine	7/470	73/18913	0.0958904	3.85867	3.90649	0.00221949	0.0167654	0.0117614	Htr6/Il1rn/Ppargc1a/Rgs4/Rgs9/Slc1a1/Tgm2	7	0.0148936
BP	GO:0010466	negative regulation of peptidase activity	13/470	209/18913	0.062201	2.50299	3.48791	0.00226857	0.0170334	0.0119494	Adora2a/Gpi/Il6/Mmp9/Ptgs2/Serpina3a/Serpina3n/Serpinb10/Serpinb2/Slpi/Thbs1/Tnf/Vegfa	13	0.0276596
BP	GO:0030812	negative regulation of nucleotide catabolic process	4/470	23/18913	0.173913	6.99833	4.59495	0.00229101	0.0170334	0.0119494	Cbfa2t3/Ddit4/Ier3/Ppargc1a	4	0.00851064
BP	GO:0032310	prostaglandin secretion	4/470	23/18913	0.173913	6.99833	4.59495	0.00229101	0.0170334	0.0119494	Il1a/Il1b/Nos2/Ptgs2	4	0.00851064
BP	GO:0033122	negative regulation of purine nucleotide catabolic process	4/470	23/18913	0.173913	6.99833	4.59495	0.00229101	0.0170334	0.0119494	Cbfa2t3/Ddit4/Ier3/Ppargc1a	4	0.00851064
BP	GO:0033630	positive regulation of cell adhesion mediated by integrin	4/470	23/18913	0.173913	6.99833	4.59495	0.00229101	0.0170334	0.0119494	Ccl5/Podxl/Ret/Syk	4	0.00851064
BP	GO:0035865	cellular response to potassium ion	4/470	23/18913	0.173913	6.99833	4.59495	0.00229101	0.0170334	0.0119494	Abcc9/Acta1/Cacna1h/Ppargc1a	4	0.00851064
BP	GO:0045820	negative regulation of glycolytic process	4/470	23/18913	0.173913	6.99833	4.59495	0.00229101	0.0170334	0.0119494	Cbfa2t3/Ddit4/Ier3/Ppargc1a	4	0.00851064
BP	GO:0061042	vascular wound healing	4/470	23/18913	0.173913	6.99833	4.59495	0.00229101	0.0170334	0.0119494	Cxcr4/Hpse/Tnf/Vegfa	4	0.00851064
BP	GO:0001910	regulation of leukocyte mediated cytotoxicity	9/470	115/18913	0.0782609	3.14925	3.69047	0.00230271	0.0170334	0.0119494	Ccl2/Cxcl1/Cxcl6/Dnase1l3/Fcgr2a/Il12b/RT1-CE1/RT1-CE16/RT1-S3	9	0.0191489
BP	GO:0002027	regulation of heart rate	9/470	115/18913	0.0782609	3.14925	3.69047	0.00230271	0.0170334	0.0119494	Adm/Apln/Crhr2/Dsc2/Gch1/Nmu/Rgs4/Slc1a1/Tnf	9	0.0191489
BP	GO:0006970	response to osmotic stress	9/470	115/18913	0.0782609	3.14925	3.69047	0.00230271	0.0170334	0.0119494	Bdkrb2/Ccl5/Kcnma1/Map7/Ptgs2/Rcsd1/Scn7a/Slc2a1/Tspo	9	0.0191489
BP	GO:0042116	macrophage activation	9/470	115/18913	0.0782609	3.14925	3.69047	0.00230271	0.0170334	0.0119494	Cx3cl1/Kcnn4/Pla2g5/Slc11a1/Syk/Thbs1/Tlr2/Tmem106a/Tnf	9	0.0191489
BP	GO:0050795	regulation of behavior	9/470	115/18913	0.0782609	3.14925	3.69047	0.00230271	0.0170334	0.0119494	Adora2a/Ccl3/Crhr2/Csf2/Grpr/Il6/Kcna2/Nmu/Pglyrp1	9	0.0191489
BP	GO:0051962	positive regulation of nervous system development	20/470	397/18913	0.0503778	2.02723	3.30209	0.00234261	0.017301	0.0121371	Clstn3/Cx3cl1/Cxcr4/Dcx/Hap1/Id2/Il1b/Il34/Il6/Mapt/Mir221/Mir222/Ntn1/Ntrk1/Ptprz1/Tgm2/Tlr2/Tnf/Tspo/Vegfa	20	0.0425532
BP	GO:0071312	cellular response to alkaloid	6/470	55/18913	0.109091	4.38986	4.019	0.00236062	0.0174029	0.0122086	Ccl5/Ppargc1a/RT1-Bb/Slc1a1/Slc1a2/Tgm2	6	0.012766
BP	GO:0030574	collagen catabolic process	5/470	38/18913	0.131579	5.29479	4.23051	0.00236766	0.0174029	0.0122086	Mmp12/Mmp13/Mmp3/Mmp9/Vsir	5	0.0106383
BP	GO:0045940	positive regulation of steroid metabolic process	5/470	38/18913	0.131579	5.29479	4.23051	0.00236766	0.0174029	0.0122086	Il1a/Npy1r/Ppargc1a/Tnf/Wnt4	5	0.0106383
BP	GO:0072577	endothelial cell apoptotic process	7/470	74/18913	0.0945946	3.80653	3.86152	0.00240006	0.0176131	0.0123561	Angptl4/Ccl2/Cd40/Mir101a/Thbs1/Tnf/Tnfaip3	7	0.0148936
BP	GO:0046889	positive regulation of lipid biosynthetic process	9/470	116/18913	0.0775862	3.1221	3.65976	0.00244293	0.0178994	0.0125569	Ccdc3/Il1a/Il1b/Mfsd2a/Npy1r/Ppargc1a/Ptgs2/Tnf/Wnt4	9	0.0191489
BP	GO:0003158	endothelium development	11/470	162/18913	0.0679012	2.73237	3.535	0.00246008	0.0179766	0.0126111	Cldn1/Cxcl10/Cxcr4/Hey1/Hpse/Il1b/Lcn2/Notch4/Stc1/Tnf/Vegfa	11	0.0234043
BP	GO:0045137	development of primary sexual characteristics	18/470	343/18913	0.0524781	2.11174	3.31701	0.00246233	0.0179766	0.0126111	Adcyap1r1/Bik/Cdh6/Cyp19a1/Dhh/Fst/Il1a/Jag2/Kdm3a/Map7/Mmp13/Nefh/Notch4/Ntrk1/Osr1/Utf1/Vegfa/Wnt4	18	0.0382979
BP	GO:0016051	carbohydrate biosynthetic process	13/470	211/18913	0.0616114	2.47927	3.44942	0.00246509	0.0179766	0.0126111	Adcyap1r1/Aldoc/Eno2/Gbe1/Gpi/Il6/Ndst3/P2ry6/Pgk1/Ppargc1a/Ppp1r3b/Ppp1r3c/Ppp1r3g	13	0.0276596
BP	GO:0031343	positive regulation of cell killing	8/470	95/18913	0.0842105	3.38867	3.72591	0.00252202	0.0183629	0.012882	Ccl2/Cxcl1/Il12b/Nos2/RT1-CE1/RT1-CE16/RT1-S3/Syk	8	0.0170213
BP	GO:0007548	sex differentiation	20/470	400/18913	0.05	2.01202	3.26575	0.00255384	0.0185654	0.0130241	Adcyap1r1/Bik/Cdh6/Cntfr/Cyp19a1/Dhh/Dmrt2/Fst/Il1a/Jag2/Kdm3a/Map7/Mmp13/Nefh/Notch4/Ntrk1/Osr1/Utf1/Vegfa/Wnt4	20	0.0425532
BP	GO:0031100	animal organ regeneration	11/470	163/18913	0.0674847	2.71561	3.51167	0.00258078	0.0187234	0.013135	Adh1c/Adm/Aldoc/Ccl2/Cldn1/Cxcl6/Hmox1/Il6/Nfkbia/Tgfbr3/Tnf	11	0.0234043
BP	GO:0045687	positive regulation of glial cell differentiation	6/470	56/18913	0.107143	4.31147	3.96169	0.00258951	0.0187234	0.013135	Cxcr4/Id2/Il1b/Il34/Ptprz1/Tlr2	6	0.012766
BP	GO:0050764	regulation of phagocytosis	9/470	117/18913	0.0769231	3.09542	3.62938	0.00258984	0.0187234	0.013135	C3/Ccl2/Fcgr2a/Nod2/Pla2g5/Slc11a1/Syk/Tgm2/Tlr2	9	0.0191489
BP	GO:0006879	intracellular iron ion homeostasis	7/470	75/18913	0.0933333	3.75577	3.81732	0.00259173	0.0187234	0.013135	Egln1/Fth1/Hephl1/Hmox1/Lcn2/Slc11a1/Steap4	7	0.0148936
BP	GO:2000146	negative regulation of cell motility	20/470	401/18913	0.0498753	2.007	3.25371	0.00262772	0.0189311	0.0132807	Arhgdib/Card10/Ccl2/Cd69/Cx3cl1/Cyp19a1/Frmd5/Il1rn/Mir101a/Mir146a/Mir221/Mir222/Ngfr/Ppargc1a/Ptprr/Stc1/Tgfbr3/Thbs1/Tnf/Wnt4	20	0.0425532
BP	GO:0006690	icosanoid metabolic process	10/470	140/18913	0.0714286	2.87432	3.55338	0.002644	0.0189311	0.0132807	Akr1c15/Bdkrb1/Cyp2c11/Gsta1/Il1b/Pla2g2a/Pla2g5/Ptgs2/Syk/Tlr2	10	0.0212766
BP	GO:0001894	tissue homeostasis	16/470	291/18913	0.0549828	2.21253	3.32758	0.00265543	0.0189311	0.0132807	Abca4/Acp5/Adgrv1/Bdkrb2/Coro1a/Cyp19a1/Il6/Mfsd2a/Nfkbiz/Nod2/Prom1/Ptgs2/Slc1a1/Slc2a1/Syk/Vegfa	16	0.0340426
BP	GO:0005996	monosaccharide metabolic process	16/470	291/18913	0.0549828	2.21253	3.32758	0.00265543	0.0189311	0.0132807	Aldoc/Clstn3/Eno2/Ero1a/Gpi/Hk2/Hk3/Il6/Khk/Npy1r/Pfkp/Pgk1/Ppargc1a/Ppp1r3b/Ppp1r3g/Tnf	16	0.0340426
BP	GO:0060249	anatomical structure homeostasis	16/470	291/18913	0.0549828	2.21253	3.32758	0.00265543	0.0189311	0.0132807	Abca4/Acp5/Adgrv1/Bdkrb2/Coro1a/Cyp19a1/Il6/Mfsd2a/Nfkbiz/Nod2/Prom1/Ptgs2/Slc1a1/Slc2a1/Syk/Vegfa	16	0.0340426
BP	GO:0002369	T cell cytokine production	5/470	39/18913	0.128205	5.15903	4.15044	0.00266129	0.0189311	0.0132807	Il1b/Il6/RT1-CE16/Rsad2/Vsir	5	0.0106383
BP	GO:0002724	regulation of T cell cytokine production	5/470	39/18913	0.128205	5.15903	4.15044	0.00266129	0.0189311	0.0132807	Il1b/Il6/RT1-CE16/Rsad2/Vsir	5	0.0106383
BP	GO:0019934	cGMP-mediated signaling	5/470	39/18913	0.128205	5.15903	4.15044	0.00266129	0.0189311	0.0132807	Gucy1a1/Gucy1b1/Irag1/Nos2/Thbs1	5	0.0106383
BP	GO:0045672	positive regulation of osteoclast differentiation	5/470	39/18913	0.128205	5.15903	4.15044	0.00266129	0.0189311	0.0132807	Ccl3/Ccl5/Gpr68/Il12b/Tnf	5	0.0106383
BP	GO:0072539	T-helper 17 cell differentiation	5/470	39/18913	0.128205	5.15903	4.15044	0.00266129	0.0189311	0.0132807	Batf/Cd69/Il6/Nfkbiz/Zc3h12a	5	0.0106383
BP	GO:0051250	negative regulation of lymphocyte activation	12/470	188/18913	0.0638298	2.56854	3.45036	0.00267018	0.0189652	0.0133046	Adora2a/Cd69/Dtx1/Id2/Pglyrp1/Pglyrp2/Pla2g5/RT1-Bb/Tnfaip3/Tnfrsf14/Vsir/Zc3h12a	12	0.0255319
BP	GO:0007567	parturition	4/470	24/18913	0.166667	6.70674	4.46571	0.00269586	0.0189733	0.0133103	Ccl2/Cyp1a1/Mmp13/Mmp9	4	0.00851064
BP	GO:0010818	T cell chemotaxis	4/470	24/18913	0.166667	6.70674	4.46571	0.00269586	0.0189733	0.0133103	Ccl3/Ccl5/Cxcl10/Cxcl16	4	0.00851064
BP	GO:0040037	negative regulation of fibroblast growth factor receptor signaling pathway	4/470	24/18913	0.166667	6.70674	4.46571	0.00269586	0.0189733	0.0133103	Apln/Ngfr/Thbs1/Wnt4	4	0.00851064
BP	GO:0045019	negative regulation of nitric oxide biosynthetic process	4/470	24/18913	0.166667	6.70674	4.46571	0.00269586	0.0189733	0.0133103	Acp5/Epor/Tspo/Zc3h12a	4	0.00851064
BP	GO:0090026	positive regulation of monocyte chemotaxis	4/470	24/18913	0.166667	6.70674	4.46571	0.00269586	0.0189733	0.0133103	Ccl2/Ccl5/Cxcl10/Pla2g7	4	0.00851064
BP	GO:1904406	negative regulation of nitric oxide metabolic process	4/470	24/18913	0.166667	6.70674	4.46571	0.00269586	0.0189733	0.0133103	Acp5/Epor/Tspo/Zc3h12a	4	0.00851064
BP	GO:0071774	response to fibroblast growth factor	10/470	141/18913	0.070922	2.85393	3.52736	0.00278442	0.0195098	0.0136867	Apln/Ccl2/Ccl5/Cyp19a1/Fgf16/Mir146a/Ngfr/Thbs1/Vegfa/Wnt4	10	0.0212766
BP	GO:0045619	regulation of lymphocyte differentiation	13/470	214/18913	0.0607477	2.44451	3.39251	0.00278588	0.0195098	0.0136867	Cd28/Cd69/Dtx1/Id2/Il6/Nfkbiz/Pglyrp1/Pglyrp2/Syk/Vsir/Wnt10b/Zap70/Zc3h12a	13	0.0276596
BP	GO:0006865	amino acid transport	12/470	189/18913	0.0634921	2.55495	3.42965	0.00278892	0.0195098	0.0136867	Adora2a/Grm1/Htr6/Il1b/Il1rn/Rgs4/Slc11a1/Slc1a1/Slc1a2/Slc1a6/Slc6a7/Tnf	12	0.0255319
BP	GO:0071230	cellular response to amino acid stimulus	12/470	189/18913	0.0634921	2.55495	3.42965	0.00278892	0.0195098	0.0136867	Ass1/Ccl5/Epor/Gria2/Grin1/Mir101a/Mir221/Mir222/Mmp3/Ptgs2/Rragd/Tnf	12	0.0255319
BP	GO:0097192	extrinsic apoptotic signaling pathway in absence of ligand	7/470	76/18913	0.0921053	3.70635	3.77388	0.00279495	0.0195226	0.0136956	Csf2/Cx3cl1/Il1a/Il1b/Lcn2/Ret/Tnf	7	0.0148936
BP	GO:0007215	glutamate receptor signaling pathway	6/470	57/18913	0.105263	4.23583	3.90572	0.00283465	0.0196752	0.0138027	Cx3cl1/Gria2/Grin1/Grin2c/Grm1/Slc1a1	6	0.012766
BP	GO:0045598	regulation of fat cell differentiation	11/470	165/18913	0.0666667	2.6827	3.46555	0.00283654	0.0196752	0.0138027	C1ql4/Ccdc3/Ffar4/Frzb/Id2/Mir27b/Ptgs2/Tnf/Vegfa/Wnt10b/Zc3h12a	11	0.0234043
BP	GO:1905039	carboxylic acid transmembrane transport	11/470	165/18913	0.0666667	2.6827	3.46555	0.00283654	0.0196752	0.0138027	Grm1/Rgs4/Slc11a1/Slc16a3/Slc1a1/Slc1a2/Slc1a6/Slc2a1/Slc6a7/Thbs1/Tnf	11	0.0234043
BP	GO:0032725	positive regulation of granulocyte macrophage colony-stimulating factor production	3/470	12/18913	0.25	10.0601	5.01168	0.00283802	0.0196752	0.0138027	Il12b/Il1b/Syk	3	0.00638298
BP	GO:1904995	negative regulation of leukocyte adhesion to vascular endothelial cell	3/470	12/18913	0.25	10.0601	5.01168	0.00283802	0.0196752	0.0138027	Mir146a/Mir221/Mir222	3	0.00638298
BP	GO:0050810	regulation of steroid biosynthetic process	8/470	97/18913	0.0824742	3.3188	3.655	0.00287288	0.0198872	0.0139514	Dhh/Gpr146/Il1a/Npy1r/Ppargc1a/Tnf/Tspo/Wnt4	8	0.0170213
BP	GO:0006720	isoprenoid metabolic process	9/470	119/18913	0.0756303	3.04339	3.56959	0.00290463	0.0200471	0.0140636	Abca4/Adh1c/Adh6/Adh7/Akr1b10/Cyp1a1/Cyp2c11/Rbp1/Rbp2	9	0.0191489
BP	GO:0072080	nephron tubule development	9/470	119/18913	0.0756303	3.04339	3.56959	0.00290463	0.0200471	0.0140636	Anpep/Hey1/Heyl/Mtss1/Osr1/Prom1/Slc2a5/Vegfa/Wnt4	9	0.0191489
BP	GO:0046632	alpha-beta T cell differentiation	10/470	142/18913	0.0704225	2.83383	3.50156	0.00293074	0.0201673	0.0141479	Batf/Bcl3/Cd69/Il12b/Il6/Nfkbiz/Rsad2/Syk/Zap70/Zc3h12a	10	0.0212766
BP	GO:0072009	nephron epithelium development	10/470	142/18913	0.0704225	2.83383	3.50156	0.00293074	0.0201673	0.0141479	Anpep/Hey1/Heyl/Mtss1/Osr1/Podxl/Prom1/Slc2a5/Vegfa/Wnt4	10	0.0212766
BP	GO:0062012	regulation of small molecule metabolic process	20/470	405/18913	0.0493827	1.98718	3.20588	0.00294148	0.0202113	0.0141787	Adcyap1r1/Cbfa2t3/Cda/Ddit4/Gpr146/Hsd11b1/Ier3/Il1b/Il6/Kcnma1/Mfsd2a/Npy1r/P2ry6/Ppargc1a/Ppp1r3b/Ppp1r3g/Ptgs2/Tnf/Tspo/Wnt4	20	0.0425532
BP	GO:0040036	regulation of fibroblast growth factor receptor signaling pathway	5/470	40/18913	0.125	5.03005	4.07307	0.0029804	0.0204182	0.0143239	Apln/Mir146a/Ngfr/Thbs1/Wnt4	5	0.0106383
BP	GO:1901889	negative regulation of cell junction assembly	5/470	40/18913	0.125	5.03005	4.07307	0.0029804	0.0204182	0.0143239	Clstn3/Il1b/Slit1/Tlr2/Tnf	5	0.0106383
BP	GO:0001937	negative regulation of endothelial cell proliferation	7/470	77/18913	0.0909091	3.65822	3.73116	0.00301017	0.0205917	0.0144456	Ccl2/Il12b/Mir146a/Mir222/Ngfr/Thbs1/Tnf	7	0.0148936
BP	GO:0043279	response to alkaloid	12/470	191/18913	0.0628272	2.52819	3.38861	0.00303928	0.0207602	0.0145639	Adora2a/Ccl5/Grin1/Il6/Nefh/Npy1r/Ppargc1a/RT1-Bb/Rgs4/Slc1a1/Slc1a2/Tgm2	12	0.0255319
BP	GO:0043280	positive regulation of cysteine-type endopeptidase activity involved in apoptotic process	9/470	120/18913	0.075	3.01803	3.54016	0.00307296	0.0209594	0.0147036	Dapk1/Egln3/Mir27b/Ngfr/Ret/Slc1a1/Syk/Tnf/Tnfsf15	9	0.0191489
BP	GO:0002698	negative regulation of immune effector process	10/470	143/18913	0.0699301	2.81402	3.47599	0.00308313	0.0209675	0.0147093	Acp5/Cd69/Hmox1/Nod2/Pglyrp1/Pglyrp2/RT1-CE16/Tnf/Vsir/Zc3h12a	10	0.0212766
BP	GO:0006693	prostaglandin metabolic process	6/470	58/18913	0.103448	4.1628	3.85101	0.00309675	0.0209675	0.0147093	Akr1c15/Bdkrb1/Gsta1/Il1b/Pla2g2a/Ptgs2	6	0.012766
BP	GO:0010883	regulation of lipid storage	6/470	58/18913	0.103448	4.1628	3.85101	0.00309675	0.0209675	0.0147093	C3/Cidea/Clstn3/Mir146a/Nfkbia/Zc3h12a	6	0.012766
BP	GO:0071398	cellular response to fatty acid	6/470	58/18913	0.103448	4.1628	3.85101	0.00309675	0.0209675	0.0147093	Ass1/Ccl2/Cldn1/Il1b/Ppargc1a/Zc3h12a	6	0.012766
BP	GO:0097300	programmed necrotic cell death	6/470	58/18913	0.103448	4.1628	3.85101	0.00309675	0.0209675	0.0147093	Birc3/Mir101a/Mir221/Pygl/Tnf/Tspo	6	0.012766
BP	GO:0018126	protein hydroxylation	4/470	25/18913	0.16	6.43847	4.34366	0.00314714	0.0210627	0.014776	Egln3/Ero1a/P3h2/P4ha2	4	0.00851064
BP	GO:0032874	positive regulation of stress-activated MAPK cascade	4/470	25/18913	0.16	6.43847	4.34366	0.00314714	0.0210627	0.014776	Crhr2/Il1a/Il1b/Nod2	4	0.00851064
BP	GO:0035634	response to stilbenoid	4/470	25/18913	0.16	6.43847	4.34366	0.00314714	0.0210627	0.014776	Cidea/Il1b/Ppargc1a/Usp18	4	0.00851064
BP	GO:0050966	detection of mechanical stimulus involved in sensory perception of pain	4/470	25/18913	0.16	6.43847	4.34366	0.00314714	0.0210627	0.014776	Cxcr4/Ntrk1/Phf24/Tnf	4	0.00851064
BP	GO:0070304	positive regulation of stress-activated protein kinase signaling cascade	4/470	25/18913	0.16	6.43847	4.34366	0.00314714	0.0210627	0.014776	Crhr2/Il1a/Il1b/Nod2	4	0.00851064
BP	GO:0071605	monocyte chemotactic protein-1 production	4/470	25/18913	0.16	6.43847	4.34366	0.00314714	0.0210627	0.014776	Il1b/Kcnn4/Nod2/Syk	4	0.00851064
BP	GO:0071637	regulation of monocyte chemotactic protein-1 production	4/470	25/18913	0.16	6.43847	4.34366	0.00314714	0.0210627	0.014776	Il1b/Kcnn4/Nod2/Syk	4	0.00851064
BP	GO:0098581	detection of external biotic stimulus	4/470	25/18913	0.16	6.43847	4.34366	0.00314714	0.0210627	0.014776	Nod2/Pglyrp1/Pglyrp2/Tlr2	4	0.00851064
BP	GO:0021543	pallium development	15/470	270/18913	0.0555556	2.23558	3.26435	0.00323199	0.0215565	0.0151225	Bnip3/Cyp19a1/Dab1/Dcx/Gria2/Grin1/Htr6/Kcna2/Mfsd2a/Mgarp/Nefh/Neurod6/Ptprz1/Slc2a1/Slc2a3	15	0.0319149
BP	GO:0001885	endothelial cell development	7/470	78/18913	0.0897436	3.61132	3.68915	0.00323783	0.0215565	0.0151225	Cldn1/Hpse/Il1b/Notch4/Stc1/Tnf/Vegfa	7	0.0148936
BP	GO:0038034	signal transduction in absence of ligand	7/470	78/18913	0.0897436	3.61132	3.68915	0.00323783	0.0215565	0.0151225	Csf2/Cx3cl1/Il1a/Il1b/Lcn2/Ret/Tnf	7	0.0148936
BP	GO:0010821	regulation of mitochondrion organization	9/470	121/18913	0.0743802	2.99309	3.51103	0.00324889	0.0215565	0.0151225	Bik/Bnip3/Higd1a/Ier3/Mapt/Mgarp/Mmp9/Pld6/Ppargc1a	9	0.0191489
BP	GO:0071548	response to dexamethasone	9/470	121/18913	0.0743802	2.99309	3.51103	0.00324889	0.0215565	0.0151225	Ass1/Ccl2/Cldn1/Ddit4/Il1b/Il6/Nos2/RT1-Bb/Vegfa	9	0.0191489
BP	GO:1905954	positive regulation of lipid localization	9/470	121/18913	0.0743802	2.99309	3.51103	0.00324889	0.0215565	0.0151225	C3/Cidea/Cyp19a1/Il1a/Il1b/Il6/Nfkbia/Tnf/Zc3h12a	9	0.0191489
BP	GO:0010952	positive regulation of peptidase activity	11/470	168/18913	0.0654762	2.63479	3.39763	0.00325811	0.0215565	0.0151225	Aph1b/Dapk1/Egln3/Mir27b/Ngfr/Ret/Slc1a1/Syk/Tnf/Tnfsf15/Vsir	11	0.0234043
BP	GO:1903825	organic acid transmembrane transport	11/470	168/18913	0.0654762	2.63479	3.39763	0.00325811	0.0215565	0.0151225	Grm1/Rgs4/Slc11a1/Slc16a3/Slc1a1/Slc1a2/Slc1a6/Slc2a1/Slc6a7/Thbs1/Tnf	11	0.0234043
BP	GO:0033198	response to ATP	5/470	41/18913	0.121951	4.90737	3.99824	0.00332625	0.021976	0.0154167	Abcc9/Ccl2/Il1b/P2rx6/Ptgs2	5	0.0106383
BP	GO:0006692	prostanoid metabolic process	6/470	59/18913	0.101695	4.09225	3.79752	0.00337651	0.0222447	0.0156053	Akr1c15/Bdkrb1/Gsta1/Il1b/Pla2g2a/Ptgs2	6	0.012766
BP	GO:0072132	mesenchyme morphogenesis	6/470	59/18913	0.101695	4.09225	3.79752	0.00337651	0.0222447	0.0156053	Acta1/Acta2/Actg2/Hey1/Heyl/Osr1	6	0.012766
BP	GO:0021675	nerve development	9/470	122/18913	0.0737705	2.96856	3.48221	0.00343266	0.0225825	0.0158423	Fcgr2a/Hes3/Kcna2/Kcna3/Kcnc3/Ngfr/Nrtn/Ntrk1/Ret	9	0.0191489
BP	GO:0006694	steroid biosynthetic process	12/470	194/18913	0.0618557	2.4891	3.32801	0.00344868	0.0226558	0.0158937	Cacna1h/Cyp19a1/Cyp1a1/Dhh/Gpr146/Hsd11b1/Il1a/Npy1r/Ppargc1a/Tnf/Tspo/Wnt4	12	0.0255319
BP	GO:0042093	T-helper cell differentiation	7/470	79/18913	0.0886076	3.56561	3.64783	0.00347841	0.0227865	0.0159854	Batf/Bcl3/Cd69/Il12b/Il6/Nfkbiz/Zc3h12a	7	0.0148936
BP	GO:0043470	regulation of carbohydrate catabolic process	7/470	79/18913	0.0886076	3.56561	3.64783	0.00347841	0.0227865	0.0159854	Cbfa2t3/Ddit4/Hsd11b1/Ier3/Ppargc1a/Ppp1r3b/Ppp1r3c	7	0.0148936
BP	GO:0030336	negative regulation of cell migration	19/470	383/18913	0.0496084	1.99626	3.14439	0.00352231	0.0230415	0.0161643	Arhgdib/Card10/Ccl2/Cd69/Cx3cl1/Cyp19a1/Il1rn/Mir101a/Mir146a/Mir221/Mir222/Ngfr/Ppargc1a/Ptprr/Stc1/Tgfbr3/Thbs1/Tnf/Wnt4	19	0.0404255
BP	GO:0043627	response to estrogen	10/470	146/18913	0.0684932	2.75619	3.40058	0.00357853	0.0233763	0.0163991	Abcc9/C3/Ccl5/Cyp19a1/Dhh/Hmox1/Kcnma1/Mir146a/Mmp13/Vegfa	10	0.0212766
BP	GO:0032621	interleukin-18 production	3/470	13/18913	0.230769	9.28625	4.77091	0.00362185	0.0234939	0.0164816	Nod2/Tlr2/Tnf	3	0.00638298
BP	GO:0032661	regulation of interleukin-18 production	3/470	13/18913	0.230769	9.28625	4.77091	0.00362185	0.0234939	0.0164816	Nod2/Tlr2/Tnf	3	0.00638298
BP	GO:0034310	primary alcohol catabolic process	3/470	13/18913	0.230769	9.28625	4.77091	0.00362185	0.0234939	0.0164816	Adh1c/Adh7/Akr1b10	3	0.00638298
BP	GO:0048537	mucosa-associated lymphoid tissue development	3/470	13/18913	0.230769	9.28625	4.77091	0.00362185	0.0234939	0.0164816	Id2/Ikzf1/Ret	3	0.00638298
BP	GO:0048541	Peyer's patch development	3/470	13/18913	0.230769	9.28625	4.77091	0.00362185	0.0234939	0.0164816	Id2/Ikzf1/Ret	3	0.00638298
BP	GO:0034114	regulation of heterotypic cell-cell adhesion	4/470	26/18913	0.153846	6.19083	4.22809	0.0036473	0.023593	0.0165511	Il1b/Il1rn/Mir221/Tnf	4	0.00851064
BP	GO:0071498	cellular response to fluid shear stress	4/470	26/18913	0.153846	6.19083	4.22809	0.0036473	0.023593	0.0165511	Ass1/Mmp13/Mtss1/Ptgs2	4	0.00851064
BP	GO:0002711	positive regulation of T cell mediated immunity	7/470	80/18913	0.0875	3.52104	3.60717	0.00373236	0.0241096	0.0169135	Il12b/Il1b/Il6/RT1-CE1/RT1-CE16/RT1-S3/Rsad2	7	0.0148936
BP	GO:0019218	regulation of steroid metabolic process	9/470	124/18913	0.0725806	2.92068	3.42543	0.00382465	0.0246714	0.0173076	Dhh/Gpr146/Il1a/Kcnma1/Npy1r/Ppargc1a/Tnf/Tspo/Wnt4	9	0.0191489
BP	GO:0071560	cellular response to transforming growth factor beta stimulus	17/470	331/18913	0.0513595	2.06673	3.12553	0.00398503	0.0256703	0.0180084	Acta2/Adgre1/Ankrd1/Ccl2/Ccl5/Cidea/Cldn1/Ero1a/Il17f/Itga8/Mir101a/Mir27b/Nfkbiz/Ppargc1a/Tgfbr3/Thbs1/Wnt4	17	0.0361702
BP	GO:0071870	cellular response to catecholamine stimulus	6/470	61/18913	0.0983607	3.95807	3.694	0.00399191	0.0256789	0.0180144	Htr6/Il1rn/Rgs4/Rgs9/Slc1a1/Tgm2	6	0.012766
BP	GO:0002294	CD4-positive, alpha-beta T cell differentiation involved in immune response	7/470	81/18913	0.0864198	3.47757	3.56715	0.00400015	0.0256962	0.0180266	Batf/Bcl3/Cd69/Il12b/Il6/Nfkbiz/Zc3h12a	7	0.0148936
BP	GO:0061326	renal tubule development	9/470	125/18913	0.072	2.89731	3.39747	0.00403335	0.0258737	0.0181511	Anpep/Hey1/Heyl/Mtss1/Osr1/Prom1/Slc2a5/Vegfa/Wnt4	9	0.0191489
BP	GO:0021987	cerebral cortex development	11/470	173/18913	0.0635838	2.55864	3.28765	0.0040713	0.0260811	0.0182966	Bnip3/Dab1/Dcx/Gria2/Grin1/Htr6/Kcna2/Mgarp/Nefh/Slc2a1/Slc2a3	11	0.0234043
BP	GO:0042092	type 2 immune response	5/470	43/18913	0.116279	4.67912	3.85562	0.00410298	0.0262116	0.0183882	Batf/Bcl3/Il6/Nod2/Rsad2	5	0.0106383
BP	GO:0062149	detection of stimulus involved in sensory perception of pain	5/470	43/18913	0.116279	4.67912	3.85562	0.00410298	0.0262116	0.0183882	Ano1/Cxcr4/Ntrk1/Phf24/Tnf	5	0.0106383
BP	GO:0002532	production of molecular mediator involved in inflammatory response	8/470	103/18913	0.0776699	3.12547	3.45288	0.00415724	0.0265217	0.0186057	Il17f/Il6/Mir146a/Nod2/Nos2/Syk/Tnf/Zc3h12a	8	0.0170213
BP	GO:0003417	growth plate cartilage development	4/470	27/18913	0.148148	5.96154	4.11842	0.00419875	0.0266399	0.0186886	Matn1/Mmp13/Stc1/Thbs1	4	0.00851064
BP	GO:0006007	glucose catabolic process	4/470	27/18913	0.148148	5.96154	4.11842	0.00419875	0.0266399	0.0186886	Eno2/Hk2/Pfkp/Pgk1	4	0.00851064
BP	GO:0046426	negative regulation of receptor signaling pathway via JAK-STAT	4/470	27/18913	0.148148	5.96154	4.11842	0.00419875	0.0266399	0.0186886	Bcl3/Dab1/Gbp7/Mir146a	4	0.00851064
BP	GO:0051156	glucose 6-phosphate metabolic process	4/470	27/18913	0.148148	5.96154	4.11842	0.00419875	0.0266399	0.0186886	Gpi/Hk2/Hk3/Hsd11b1	4	0.00851064
BP	GO:0001678	intracellular glucose homeostasis	14/470	251/18913	0.0557769	2.24449	3.16847	0.00421506	0.0267069	0.0187356	Ano1/Ccl2/Crhr2/Cyp19a1/Gpr68/Hk2/Hk3/Il1b/Mir146a/Mir221/Mir222/Ngfr/Pde1c/Ppargc1a	14	0.0297872
BP	GO:0010469	regulation of signaling receptor activity	9/470	126/18913	0.0714286	2.87432	3.36978	0.00425085	0.0268969	0.0188689	Ccl2/Chrna4/Dapk1/Dlgap2/Nrxn2/Ppargc1a/Rasgrf1/Rgs9/Tnf	9	0.0191489
BP	GO:0002293	alpha-beta T cell differentiation involved in immune response	7/470	82/18913	0.0853659	3.43516	3.52776	0.00428225	0.0270219	0.0189566	Batf/Bcl3/Cd69/Il12b/Il6/Nfkbiz/Zc3h12a	7	0.0148936
BP	GO:0032088	negative regulation of NF-kappaB transcription factor activity	7/470	82/18913	0.0853659	3.43516	3.52776	0.00428225	0.0270219	0.0189566	Bcl3/Coro1a/Mturn/Nfkbia/Nod2/Tnfaip3/Zc3h12a	7	0.0148936
BP	GO:0008202	steroid metabolic process	18/470	362/18913	0.0497238	2.00091	3.06948	0.0043389	0.0273421	0.0191812	Adm/Akr1c15/Akr1c19/Cacna1h/Cyp19a1/Cyp1a1/Cyp2c11/Dhh/Gpr146/Hsd11b1/Il1a/Kcnma1/Npy1r/Ppargc1a/Sult2b1/Tnf/Tspo/Wnt4	18	0.0382979
BP	GO:0030072	peptide hormone secretion	17/470	334/18913	0.0508982	2.04817	3.08527	0.00435955	0.027435	0.0192464	Ano1/Apln/Ccl5/Crhr2/Ffar4/Gipr/Gnaz/Gpr68/Il1b/Il1rn/Il6/Nmu/Nos2/Pde1c/Sstr2/Stxbp5l/Tnf	17	0.0361702
BP	GO:0015844	monoamine transport	8/470	104/18913	0.0769231	3.09542	3.42063	0.0044085	0.027668	0.0194098	Adora2a/Chrna4/Crhr2/Fcgr2a/Htr6/Kcna2/Syk/Tgm2	8	0.0170213
BP	GO:0019915	lipid storage	8/470	104/18913	0.0769231	3.09542	3.42063	0.0044085	0.027668	0.0194098	C3/Cidea/Clstn3/Il1b/Mir146a/Nfkbia/Tnf/Zc3h12a	8	0.0170213
BP	GO:0090287	regulation of cellular response to growth factor stimulus	18/470	363/18913	0.0495868	1.99539	3.05688	0.00446366	0.0277932	0.0194977	Apln/Cidea/Fgf16/Fst/Gdf5/Il12b/Il17f/Itga8/Mir101a/Mir146a/Mir27b/Ngfr/Sostdc1/Tgfbr3/Thbs1/Vegfa/Vsir/Wnt4	18	0.0382979
BP	GO:0003073	regulation of systemic arterial blood pressure	9/470	127/18913	0.0708661	2.85168	3.34236	0.0044774	0.0277932	0.0194977	Adm/Adrb3/Apln/Enpep/Ier3/Kcnn4/Nmu/Slc2a5/Tnf	9	0.0191489
BP	GO:1904892	regulation of receptor signaling pathway via STAT	9/470	127/18913	0.0708661	2.85168	3.34236	0.0044774	0.0277932	0.0194977	Bcl3/Ccl5/Cxcl6/Dab1/Gbp7/Il6/Mir146a/Mir221/Ret	9	0.0191489
BP	GO:0030198	extracellular matrix organization	17/470	335/18913	0.0507463	2.04205	3.07195	0.00449064	0.0277932	0.0194977	Adamts15/Bcl3/Col19a1/Col22a1/Ero1a/Il6/Itga8/Lamb3/Mir27b/Mmp12/Mmp13/Mmp3/Mmp9/Tcf15/Tgfbr3/Thsd4/Tnf	17	0.0361702
BP	GO:0051346	negative regulation of hydrolase activity	15/470	280/18913	0.0535714	2.15574	3.11027	0.00452524	0.0277932	0.0194977	Adora2a/Angptl4/Egln1/Gpi/Il6/Mmp9/Ptgs2/Serpina3a/Serpina3n/Serpinb10/Serpinb2/Slpi/Thbs1/Tnf/Vegfa	15	0.0319149
BP	GO:0002759	regulation of antimicrobial humoral response	3/470	14/18913	0.214286	8.62295	4.5548	0.0045253	0.0277932	0.0194977	Evpl/Il17f/Nod2	3	0.00638298
BP	GO:0002775	antimicrobial peptide production	3/470	14/18913	0.214286	8.62295	4.5548	0.0045253	0.0277932	0.0194977	Evpl/Il17f/Nod2	3	0.00638298
BP	GO:0006182	cGMP biosynthetic process	3/470	14/18913	0.214286	8.62295	4.5548	0.0045253	0.0277932	0.0194977	Gucy1a1/Gucy1b1/Gucy2c	3	0.00638298
BP	GO:0035900	response to isolation stress	3/470	14/18913	0.214286	8.62295	4.5548	0.0045253	0.0277932	0.0194977	Ccl2/Il1b/Tnf	3	0.00638298
BP	GO:0051964	negative regulation of synapse assembly	3/470	14/18913	0.214286	8.62295	4.5548	0.0045253	0.0277932	0.0194977	Clstn3/Slit1/Tlr2	3	0.00638298
BP	GO:0071447	cellular response to hydroperoxide	3/470	14/18913	0.214286	8.62295	4.5548	0.0045253	0.0277932	0.0194977	Ccl5/Dapk1/Nefh	3	0.00638298
BP	GO:0072160	nephron tubule epithelial cell differentiation	3/470	14/18913	0.214286	8.62295	4.5548	0.0045253	0.0277932	0.0194977	Mtss1/Osr1/Prom1	3	0.00638298
BP	GO:0097501	stress response to metal ion	3/470	14/18913	0.214286	8.62295	4.5548	0.0045253	0.0277932	0.0194977	Mt1/Mt2A/Slc11a1	3	0.00638298
BP	GO:0140459	response to Gram-positive bacterium	3/470	14/18913	0.214286	8.62295	4.5548	0.0045253	0.0277932	0.0194977	Il6/Mir146a/Nfkbiz	3	0.00638298
BP	GO:0019320	hexose catabolic process	5/470	44/18913	0.113636	4.57278	3.78756	0.00453631	0.0277932	0.0194977	Eno2/Hk2/Khk/Pfkp/Pgk1	5	0.0106383
BP	GO:0032689	negative regulation of type II interferon production	5/470	44/18913	0.113636	4.57278	3.78756	0.00453631	0.0277932	0.0194977	Nod2/Pglyrp1/Pglyrp2/Vsir/Zc3h12a	5	0.0106383
BP	GO:0070266	necroptotic process	5/470	44/18913	0.113636	4.57278	3.78756	0.00453631	0.0277932	0.0194977	Birc3/Mir101a/Mir221/Pygl/Tnf	5	0.0106383
BP	GO:1904994	regulation of leukocyte adhesion to vascular endothelial cell	5/470	44/18913	0.113636	4.57278	3.78756	0.00453631	0.0277932	0.0194977	Il6/Mir146a/Mir221/Mir222/Tnf	5	0.0106383
BP	GO:0002761	regulation of myeloid leukocyte differentiation	10/470	151/18913	0.0662252	2.66493	3.27904	0.00454259	0.0277949	0.0194989	Ccl3/Ccl5/Csf2/Gpr68/Id2/Ikzf1/Il12b/Il34/Rbp1/Tnf	10	0.0212766
BP	GO:0002287	alpha-beta T cell activation involved in immune response	7/470	83/18913	0.0843373	3.39377	3.48898	0.00457914	0.0279816	0.0196299	Batf/Bcl3/Cd69/Il12b/Il6/Nfkbiz/Zc3h12a	7	0.0148936
BP	GO:0017157	regulation of exocytosis	13/470	227/18913	0.0572687	2.30452	3.15651	0.00459402	0.0280356	0.0196678	Cacna1h/Cacna1i/Doc2a/Hap1/Hmox1/Npy1r/Rab26/Septin4/Sptbn2/Stxbp5l/Syk/Syt15/Syt17	13	0.0276596
BP	GO:0043062	extracellular structure organization	17/470	336/18913	0.0505952	2.03597	3.05867	0.00462494	0.0281502	0.0197481	Adamts15/Bcl3/Col19a1/Col22a1/Ero1a/Il6/Itga8/Lamb3/Mir27b/Mmp12/Mmp13/Mmp3/Mmp9/Tcf15/Tgfbr3/Thsd4/Tnf	17	0.0361702
BP	GO:0045229	external encapsulating structure organization	17/470	336/18913	0.0505952	2.03597	3.05867	0.00462494	0.0281502	0.0197481	Adamts15/Bcl3/Col19a1/Col22a1/Ero1a/Il6/Itga8/Lamb3/Mir27b/Mmp12/Mmp13/Mmp3/Mmp9/Tcf15/Tgfbr3/Thsd4/Tnf	17	0.0361702
BP	GO:0043367	CD4-positive, alpha-beta T cell differentiation	8/470	105/18913	0.0761905	3.06594	3.38877	0.00467128	0.028395	0.0199199	Batf/Bcl3/Cd69/Il12b/Il6/Nfkbiz/Rsad2/Zc3h12a	8	0.0170213
BP	GO:0071354	cellular response to interleukin-6	6/470	63/18913	0.0952381	3.83242	3.5948	0.00468659	0.0284136	0.0199329	Ccl2/Il6/Lcn2/Mir146a/Ppargc1a/Serpina3n	6	0.012766
BP	GO:0071868	cellular response to monoamine stimulus	6/470	63/18913	0.0952381	3.83242	3.5948	0.00468659	0.0284136	0.0199329	Htr6/Il1rn/Rgs4/Rgs9/Slc1a1/Tgm2	6	0.012766
BP	GO:0008406	gonad development	17/470	337/18913	0.0504451	2.02993	3.04544	0.00476252	0.0288144	0.0202141	Bik/Cdh6/Cyp19a1/Dhh/Fst/Il1a/Jag2/Kdm3a/Map7/Mmp13/Nefh/Notch4/Ntrk1/Osr1/Utf1/Vegfa/Wnt4	17	0.0361702
BP	GO:0046890	regulation of lipid biosynthetic process	13/470	228/18913	0.0570175	2.29441	3.13902	0.00476513	0.0288144	0.0202141	C3/Ccdc3/Dhh/Gpr146/Il1a/Il1b/Mfsd2a/Npy1r/Ppargc1a/Ptgs2/Tnf/Tspo/Wnt4	13	0.0276596
BP	GO:0002726	positive regulation of T cell cytokine production	4/470	28/18913	0.142857	5.74863	4.01413	0.00480382	0.0288977	0.0202725	Il1b/Il6/RT1-CE16/Rsad2	4	0.00851064
BP	GO:0051767	nitric-oxide synthase biosynthetic process	4/470	28/18913	0.142857	5.74863	4.01413	0.00480382	0.0288977	0.0202725	Ccl2/Ccl20/Nod2/Tlr2	4	0.00851064
BP	GO:0051769	regulation of nitric-oxide synthase biosynthetic process	4/470	28/18913	0.142857	5.74863	4.01413	0.00480382	0.0288977	0.0202725	Ccl2/Ccl20/Nod2/Tlr2	4	0.00851064
BP	GO:0060445	branching involved in salivary gland morphogenesis	4/470	28/18913	0.142857	5.74863	4.01413	0.00480382	0.0288977	0.0202725	Esrp2/Il6/Tgm2/Tnf	4	0.00851064
BP	GO:0006820	monoatomic anion transport	11/470	177/18913	0.0621469	2.50082	3.20242	0.00483196	0.0290293	0.0203648	Ano1/Gabrp/Kcnn4/Mcoln3/P2ry6/Slc1a1/Slc1a2/Slc1a6/Slc26a9/Stc1/Tspo	11	0.0234043
BP	GO:0048771	tissue remodeling	13/470	229/18913	0.0567686	2.28439	3.12163	0.00494132	0.0295607	0.0207377	Acp5/Ccl2/Cyp19a1/Cyp1a1/Gdf5/Il1a/Il6/Mmp9/Nos2/Syk/Tgfbr3/Tgm2/Vegfa	13	0.0276596
BP	GO:0001656	metanephros development	8/470	106/18913	0.0754717	3.03701	3.35729	0.00494591	0.0295607	0.0207377	Anpep/Id2/Itga8/Mtss1/Osr1/Ret/Slc2a5/Wnt4	8	0.0170213
BP	GO:0070167	regulation of biomineral tissue development	8/470	106/18913	0.0754717	3.03701	3.35729	0.00494591	0.0295607	0.0207377	Adgrv1/Ccl3/Hey1/Matn1/Mgp/Osr1/Wnt10b/Wnt4	8	0.0170213
BP	GO:1904427	positive regulation of calcium ion transmembrane transport	8/470	106/18913	0.0754717	3.03701	3.35729	0.00494591	0.0295607	0.0207377	Adcyap1r1/Bdkrb1/Cx3cl1/Cxcl10/Grin1/Hap1/P2ry6/Stac2	8	0.0170213
BP	GO:0042594	response to starvation	15/470	283/18913	0.0530035	2.13288	3.06531	0.00498638	0.0297	0.0208354	Acp5/Adm/Adss1/Dsc2/Higd1a/Il1rn/Mfsd2a/Ppargc1a/Rnf152/Rragd/Slc2a1/Sstr2/Upp1/Wnt4/Zc3h12a	15	0.0319149
BP	GO:0008207	C21-steroid hormone metabolic process	5/470	45/18913	0.111111	4.47116	3.72151	0.00500123	0.0297	0.0208354	Cacna1h/Cyp19a1/Kcnma1/Ppargc1a/Wnt4	5	0.0106383
BP	GO:0014047	glutamate secretion	5/470	45/18913	0.111111	4.47116	3.72151	0.00500123	0.0297	0.0208354	Adora2a/Grm1/Htr6/Il1b/Il1rn	5	0.0106383
BP	GO:0051938	L-glutamate import	5/470	45/18913	0.111111	4.47116	3.72151	0.00500123	0.0297	0.0208354	Grm1/Slc1a1/Slc1a2/Slc1a6/Tnf	5	0.0106383
BP	GO:0120178	steroid hormone biosynthetic process	5/470	45/18913	0.111111	4.47116	3.72151	0.00500123	0.0297	0.0208354	Cacna1h/Cyp19a1/Hsd11b1/Ppargc1a/Wnt4	5	0.0106383
BP	GO:0032731	positive regulation of interleukin-1 beta production	6/470	64/18913	0.09375	3.77254	3.54671	0.00506547	0.0300047	0.0210491	Ccl3/Il6/Nod2/Tlr2/Tmem106a/Tnf	6	0.012766
BP	GO:1904645	response to amyloid-beta	6/470	64/18913	0.09375	3.77254	3.54671	0.00506547	0.0300047	0.0210491	Lcn2/Mir146a/Mmp9/Ngfr/Syk/Tnf	6	0.012766
BP	GO:0071559	response to transforming growth factor beta	17/470	340/18913	0.05	2.01202	3.00601	0.0051955	0.0307356	0.0215619	Acta2/Adgre1/Ankrd1/Ccl2/Ccl5/Cidea/Cldn1/Ero1a/Il17f/Itga8/Mir101a/Mir27b/Nfkbiz/Ppargc1a/Tgfbr3/Thbs1/Wnt4	17	0.0361702
BP	GO:0008625	extrinsic apoptotic signaling pathway via death domain receptors	7/470	85/18913	0.0823529	3.31392	3.41316	0.0052192	0.0308365	0.0216326	Dapk1/Hmox1/Mir221/Mir222/Thbs1/Tnf/Tnfaip3	7	0.0148936
BP	GO:1901222	regulation of non-canonical NF-kappaB signal transduction	8/470	107/18913	0.0747664	3.00863	3.32618	0.00523274	0.0308771	0.0216612	Bcl3/Birc3/Il1b/Mir27b/Nod2/Tlr2/Tnf/Zc3h12a	8	0.0170213
BP	GO:0050680	negative regulation of epithelial cell proliferation	12/470	205/18913	0.0585366	2.35554	3.11513	0.00534612	0.0315061	0.0221024	Ccl2/Gdf5/Il12b/Mir146a/Mir222/Mtss1/Ngfr/Pla2g2a/Tgfbr3/Thbs1/Tnf/Wnt10b	12	0.0255319
BP	GO:0034605	cellular response to heat	6/470	65/18913	0.0923077	3.7145	3.49958	0.00546634	0.0321737	0.0225707	Ano1/Cxcl10/Hmox1/Il1a/Mapt/Ptgs2	6	0.012766
BP	GO:0051281	positive regulation of release of sequestered calcium ion into cytosol	5/470	46/18913	0.108696	4.37396	3.65737	0.00549893	0.0322938	0.022655	Bdkrb1/Cx3cl1/Cxcl10/Hap1/P2ry6	5	0.0106383
BP	GO:0006735	NADH regeneration	3/470	15/18913	0.2	8.04809	4.35924	0.00555329	0.0322938	0.022655	Eno2/Pfkp/Pgk1	3	0.00638298
BP	GO:0032341	aldosterone metabolic process	3/470	15/18913	0.2	8.04809	4.35924	0.00555329	0.0322938	0.022655	Cacna1h/Kcnma1/Wnt4	3	0.00638298
BP	GO:0036017	response to erythropoietin	3/470	15/18913	0.2	8.04809	4.35924	0.00555329	0.0322938	0.022655	Cd40/Epor/Mt2A	3	0.00638298
BP	GO:0061621	canonical glycolysis	3/470	15/18913	0.2	8.04809	4.35924	0.00555329	0.0322938	0.022655	Eno2/Pfkp/Pgk1	3	0.00638298
BP	GO:0061718	glucose catabolic process to pyruvate	3/470	15/18913	0.2	8.04809	4.35924	0.00555329	0.0322938	0.022655	Eno2/Pfkp/Pgk1	3	0.00638298
BP	GO:0097475	motor neuron migration	3/470	15/18913	0.2	8.04809	4.35924	0.00555329	0.0322938	0.022655	Dab1/Ntn1/Vegfa	3	0.00638298
BP	GO:0030500	regulation of bone mineralization	7/470	86/18913	0.0813953	3.27538	3.3761	0.00556333	0.0322938	0.022655	Adgrv1/Ccl3/Matn1/Mgp/Osr1/Wnt10b/Wnt4	7	0.0148936
BP	GO:0051602	response to electrical stimulus	7/470	86/18913	0.0813953	3.27538	3.3761	0.00556333	0.0322938	0.022655	Adss1/Dcx/Grm1/Il6/Npy1r/Ntrk1/Ppargc1a	7	0.0148936
BP	GO:0070509	calcium ion import	7/470	86/18913	0.0813953	3.27538	3.3761	0.00556333	0.0322938	0.022655	Cacna1h/Cacna1i/Ccl2/Crhr2/Cxcr4/Kcnn4/Stc1	7	0.0148936
BP	GO:2000514	regulation of CD4-positive, alpha-beta T cell activation	7/470	86/18913	0.0813953	3.27538	3.3761	0.00556333	0.0322938	0.022655	Cd28/Cd69/Il6/Nfkbiz/Tnfrsf14/Vsir/Zc3h12a	7	0.0148936
BP	GO:0070588	calcium ion transmembrane transport	18/470	371/18913	0.0485175	1.95237	2.95743	0.00557197	0.0323035	0.0226618	Adcyap1r1/Bdkrb1/Cacna1h/Cacna1i/Ccl3/Coro1a/Cx3cl1/Cxcl10/Ero1a/Grin1/Grin2c/Hap1/Kcnn4/P2rx6/P2ry6/Panx3/Rgs9/Stac2	18	0.0382979
BP	GO:0002790	peptide secretion	17/470	343/18913	0.0495627	1.99442	2.96698	0.00566012	0.0327736	0.0229916	Ano1/Apln/Ccl5/Crhr2/Ffar4/Gipr/Gnaz/Gpr68/Il1b/Il1rn/Il6/Nmu/Nos2/Pde1c/Sstr2/Stxbp5l/Tnf	17	0.0361702
BP	GO:0015807	L-amino acid transport	8/470	109/18913	0.0733945	2.95343	3.26503	0.00584435	0.033756	0.0236808	Grm1/Rgs4/Slc11a1/Slc1a1/Slc1a2/Slc1a6/Slc6a7/Tnf	8	0.0170213
BP	GO:0043525	positive regulation of neuron apoptotic process	8/470	109/18913	0.0733945	2.95343	3.26503	0.00584435	0.033756	0.0236808	Ccl3/Egln1/Gch1/Il1b/Kcnma1/Lcn2/Ppp2r2b/Tnf	8	0.0170213
BP	GO:0090303	positive regulation of wound healing	6/470	66/18913	0.0909091	3.65822	3.45337	0.00588992	0.0339347	0.0238061	Ccl2/Cldn1/Cxcr4/Hpse/Mir221/Thbs1	6	0.012766
BP	GO:2000630	positive regulation of miRNA metabolic process	6/470	66/18913	0.0909091	3.65822	3.45337	0.00588992	0.0339347	0.0238061	Apln/Fosl1/Il6/Ngfr/Tnf/Zc3h12a	6	0.012766
BP	GO:0050829	defense response to Gram-negative bacterium	7/470	87/18913	0.0804598	3.23774	3.33958	0.00592417	0.0340897	0.0239149	Cxcl6/Il12b/Il17f/Nfkbiz/Nos2/Slc11a1/Tnfrsf14	7	0.0148936
BP	GO:0002548	monocyte chemotaxis	5/470	47/18913	0.106383	4.2809	3.59504	0.0060306	0.0345734	0.0242542	Ccl2/Ccl3/Ccl5/Cxcl10/Pla2g7	5	0.0106383
BP	GO:0002701	negative regulation of production of molecular mediator of immune response	5/470	47/18913	0.106383	4.2809	3.59504	0.0060306	0.0345734	0.0242542	Acp5/Hmox1/Nod2/Tnf/Vsir	5	0.0106383
BP	GO:0046365	monosaccharide catabolic process	5/470	47/18913	0.106383	4.2809	3.59504	0.0060306	0.0345734	0.0242542	Eno2/Hk2/Khk/Pfkp/Pgk1	5	0.0106383
BP	GO:0062014	negative regulation of small molecule metabolic process	9/470	133/18913	0.0676692	2.72304	3.18328	0.00604084	0.0345894	0.0242654	Cbfa2t3/Cda/Ddit4/Ier3/Il6/Mfsd2a/Ppargc1a/Tspo/Wnt4	9	0.0191489
BP	GO:0006006	glucose metabolic process	13/470	235/18913	0.0553191	2.22607	3.01915	0.00611143	0.0349336	0.0245069	Aldoc/Eno2/Gpi/Hk2/Hk3/Il6/Npy1r/Pfkp/Pgk1/Ppargc1a/Ppp1r3b/Ppp1r3g/Tnf	13	0.0276596
BP	GO:0046425	regulation of receptor signaling pathway via JAK-STAT	8/470	110/18913	0.0727273	2.92658	3.23497	0.00616983	0.0349336	0.0245069	Bcl3/Cxcl6/Dab1/Gbp7/Il6/Mir146a/Mir221/Ret	8	0.0170213
BP	GO:0051592	response to calcium ion	11/470	183/18913	0.0601093	2.41882	3.07884	0.00617961	0.0349336	0.0245069	Abcc9/Adgrv1/Cpne5/Gipr/Grin1/Il6/Kcnma1/Kcnmb1/Mgp/Pde1c/Thbs1	11	0.0234043
BP	GO:0002523	leukocyte migration involved in inflammatory response	4/470	30/18913	0.133333	5.36539	3.81988	0.00618381	0.0349336	0.0245069	Ccl2/Cx3cl1/Nfkbia/Tnf	4	0.00851064
BP	GO:0006882	intracellular zinc ion homeostasis	4/470	30/18913	0.133333	5.36539	3.81988	0.00618381	0.0349336	0.0245069	Atp7b/Mt1/Mt2A/Slc1a1	4	0.00851064
BP	GO:0006925	inflammatory cell apoptotic process	4/470	30/18913	0.133333	5.36539	3.81988	0.00618381	0.0349336	0.0245069	Ccl5/Hcar2/Il6/Nod2	4	0.00851064
BP	GO:0008209	androgen metabolic process	4/470	30/18913	0.133333	5.36539	3.81988	0.00618381	0.0349336	0.0245069	Adm/Cyp19a1/Ppargc1a/Wnt4	4	0.00851064
BP	GO:0032928	regulation of superoxide anion generation	4/470	30/18913	0.133333	5.36539	3.81988	0.00618381	0.0349336	0.0245069	Acp5/Cxcl1/Mapt/Syk	4	0.00851064
BP	GO:0035590	purinergic nucleotide receptor signaling pathway	4/470	30/18913	0.133333	5.36539	3.81988	0.00618381	0.0349336	0.0245069	Adora2a/Hcar2/P2rx6/P2ry6	4	0.00851064
BP	GO:0060343	trabecula formation	4/470	30/18913	0.133333	5.36539	3.81988	0.00618381	0.0349336	0.0245069	Egln1/Tgfbr3/Vegfa/Wnt10b	4	0.00851064
BP	GO:1903861	positive regulation of dendrite extension	4/470	30/18913	0.133333	5.36539	3.81988	0.00618381	0.0349336	0.0245069	Cpne5/Cxcr4/Mir222/Syt17	4	0.00851064
BP	GO:0034767	positive regulation of monoatomic ion transmembrane transport	12/470	209/18913	0.0574163	2.31046	3.04109	0.006213	0.0350558	0.0245926	Adcyap1r1/Bdkrb1/Ccl2/Cx3cl1/Cxcl10/Grin1/Hap1/Kcnmb1/Lcn2/P2ry6/Rgs9/Stac2	12	0.0255319
BP	GO:0045834	positive regulation of lipid metabolic process	10/470	158/18913	0.0632911	2.54686	3.1169	0.00622315	0.0350704	0.0246029	Ccdc3/Clstn3/Il1a/Il1b/Mfsd2a/Npy1r/Ppargc1a/Ptgs2/Tnf/Wnt4	10	0.0212766
BP	GO:0002220	innate immune response activating cell surface receptor signaling pathway	7/470	88/18913	0.0795455	3.20094	3.30358	0.00630221	0.0354729	0.0248852	Nfkbia/Nod2/Syk/Ticam2/Tlr2/Tnfaip3/Tnip3	7	0.0148936
BP	GO:0033280	response to vitamin D	6/470	67/18913	0.0895522	3.60362	3.40806	0.00633694	0.0356251	0.024992	Cxcl10/Il1b/Nos2/Ptgs2/Stc1/Stc2	6	0.012766
BP	GO:0008643	carbohydrate transport	10/470	159/18913	0.0628931	2.53084	3.09446	0.00649818	0.0364874	0.0255969	C3/Ffar4/Hk2/Il1b/Mfsd2a/Slc1a2/Slc2a1/Slc2a3/Slc2a5/Tnf	10	0.0212766
BP	GO:0016042	lipid catabolic process	17/470	348/18913	0.0488506	1.96577	2.9028	0.00650933	0.0365058	0.0256098	Abhd15/Akr1b10/Ces1a/Cidea/Clstn3/Cyp19a1/Faah/Hcar2/Hsd11b1/Il1b/Liph/Mfsd2a/Pla2g2a/Pla2g5/Pla2g7/Pld6/Tnf	17	0.0361702
BP	GO:1901888	regulation of cell junction assembly	16/470	320/18913	0.05	2.01202	2.91469	0.0065918	0.0367773	0.0258003	Cldn1/Clstn3/Dcx/Grin1/Hopx/Il1b/Mdga2/Nrxn2/Ntn1/Ntrk1/Podxl/Slit1/Tlr2/Tnf/Vegfa/Wnt4	16	0.0340426
BP	GO:0032768	regulation of monooxygenase activity	5/470	48/18913	0.104167	4.19171	3.53442	0.0065974	0.0367773	0.0258003	Gch1/Il1a/Il1b/Mir27b/Tnf	5	0.0106383
BP	GO:0034405	response to fluid shear stress	5/470	48/18913	0.104167	4.19171	3.53442	0.0065974	0.0367773	0.0258003	Ass1/Csf2/Mmp13/Mtss1/Ptgs2	5	0.0106383
BP	GO:1904706	negative regulation of vascular associated smooth muscle cell proliferation	5/470	48/18913	0.104167	4.19171	3.53442	0.0065974	0.0367773	0.0258003	Apln/Cnn1/Hmox1/Ndrg2/Rgs5	5	0.0106383
BP	GO:2001239	regulation of extrinsic apoptotic signaling pathway in absence of ligand	5/470	48/18913	0.104167	4.19171	3.53442	0.0065974	0.0367773	0.0258003	Csf2/Cx3cl1/Il1b/Ret/Tnf	5	0.0106383
BP	GO:0007200	phospholipase C-activating G protein-coupled receptor signaling pathway	9/470	135/18913	0.0666667	2.6827	3.1322	0.00664594	0.0369591	0.0259278	Adora2a/Ano1/Crhr2/Ffar4/Grm1/Grpr/Rxfp3/Tgm2/Vegfa	9	0.0191489
BP	GO:2001056	positive regulation of cysteine-type endopeptidase activity	9/470	135/18913	0.0666667	2.6827	3.1322	0.00664594	0.0369591	0.0259278	Dapk1/Egln3/Mir27b/Ngfr/Ret/Slc1a1/Syk/Tnf/Tnfsf15	9	0.0191489
BP	GO:0050851	antigen receptor-mediated signaling pathway	11/470	185/18913	0.0594595	2.39267	3.03873	0.00668908	0.0370494	0.0259912	Cd28/Fcho1/Kcnn4/Nfkbia/Nfkbiz/RT1-Bb/RT1-CE16/Syk/Vav3/Zap70/Zc3h12a	11	0.0234043
BP	GO:0032222	regulation of synaptic transmission, cholinergic	3/470	16/18913	0.1875	7.54508	4.181	0.00671012	0.0370494	0.0259912	Adora2a/Htr6/Ngfr	3	0.00638298
BP	GO:0033084	regulation of immature T cell proliferation in thymus	3/470	16/18913	0.1875	7.54508	4.181	0.00671012	0.0370494	0.0259912	Il1a/Il1b/Tnfrsf9	3	0.00638298
BP	GO:0033591	response to L-ascorbic acid	3/470	16/18913	0.1875	7.54508	4.181	0.00671012	0.0370494	0.0259912	Acp5/Il1a/Il1b	3	0.00638298
BP	GO:0061687	detoxification of inorganic compound	3/470	16/18913	0.1875	7.54508	4.181	0.00671012	0.0370494	0.0259912	Mt1/Mt2A/Slc11a1	3	0.00638298
BP	GO:0098962	regulation of postsynaptic neurotransmitter receptor activity	3/470	16/18913	0.1875	7.54508	4.181	0.00671012	0.0370494	0.0259912	Chrna4/Dlgap2/Nrxn2	3	0.00638298
BP	GO:0000302	response to reactive oxygen species	15/470	293/18913	0.0511945	2.06009	2.91937	0.00680593	0.0374124	0.0262458	Abcc9/Adcyap1r1/Bnip3/Epor/Fosl1/Gch1/Hk3/Hmox1/Il1a/Il1b/Il6/Lcn2/Mmp3/Ppargc1a/Tnfaip3	15	0.0319149
BP	GO:0032623	interleukin-2 production	6/470	68/18913	0.0882353	3.55063	3.36361	0.00680812	0.0374124	0.0262458	Cd28/Il17f/Il1a/Il1b/Nod2/Tnfaip3	6	0.012766
BP	GO:0032663	regulation of interleukin-2 production	6/470	68/18913	0.0882353	3.55063	3.36361	0.00680812	0.0374124	0.0262458	Cd28/Il17f/Il1a/Il1b/Nod2/Tnfaip3	6	0.012766
BP	GO:0050432	catecholamine secretion	6/470	68/18913	0.0882353	3.55063	3.36361	0.00680812	0.0374124	0.0262458	Adora2a/Chrna4/Crhr2/Htr6/Kcna2/Tgm2	6	0.012766
BP	GO:0002833	positive regulation of response to biotic stimulus	19/470	408/18913	0.0465686	1.87394	2.84885	0.00685529	0.037627	0.0263964	Cxcl1/Fosl1/Gbp7/Il12b/Il17f/Mir146a/Mmp12/Nfkbia/Nfkbiz/Nod2/Oasl/Pla2g5/Rsad2/Syk/Ticam2/Tlr2/Tnf/Tnfaip3/Tnip3	19	0.0404255
BP	GO:0002323	natural killer cell activation involved in immune response	4/470	31/18913	0.129032	5.19231	3.72917	0.00696302	0.0378599	0.0265597	Coro1a/Il12b/Pglyrp1/Pglyrp2	4	0.00851064
BP	GO:0002825	regulation of T-helper 1 type immune response	4/470	31/18913	0.129032	5.19231	3.72917	0.00696302	0.0378599	0.0265597	Il12b/Il1b/RT1-Bb/Slc11a1	4	0.00851064
BP	GO:0009648	photoperiodism	4/470	31/18913	0.129032	5.19231	3.72917	0.00696302	0.0378599	0.0265597	Bhlhe40/Fbxl21/Id2/Nmu	4	0.00851064
BP	GO:0010226	response to lithium ion	4/470	31/18913	0.129032	5.19231	3.72917	0.00696302	0.0378599	0.0265597	Fabp4/Gria2/Id2/Nos2	4	0.00851064
BP	GO:0010623	programmed cell death involved in cell development	4/470	31/18913	0.129032	5.19231	3.72917	0.00696302	0.0378599	0.0265597	Dnase1l3/Il1a/Il1b/Ntrk1	4	0.00851064
BP	GO:0045662	negative regulation of myoblast differentiation	4/470	31/18913	0.129032	5.19231	3.72917	0.00696302	0.0378599	0.0265597	Cxcl10/Cxcl14/Sostdc1/Tnf	4	0.00851064
BP	GO:1900017	positive regulation of cytokine production involved in inflammatory response	4/470	31/18913	0.129032	5.19231	3.72917	0.00696302	0.0378599	0.0265597	Il17f/Il6/Nod2/Tnf	4	0.00851064
BP	GO:2000831	regulation of steroid hormone secretion	4/470	31/18913	0.129032	5.19231	3.72917	0.00696302	0.0378599	0.0265597	Cyp19a1/Il6/Tnf/Tspo	4	0.00851064
BP	GO:0050954	sensory perception of mechanical stimulus	15/470	294/18913	0.0510204	2.05308	2.90509	0.00701387	0.0380917	0.0267224	Adgrv1/Cxcr4/Eps8l2/Kcnma1/Mcoln3/Mir146a/Mir221/Mir222/Mir23b/Mir27b/Mir542/Ntrk1/Phf24/Tmc7/Tnf	15	0.0319149
BP	GO:0001909	leukocyte mediated cytotoxicity	10/470	161/18913	0.0621118	2.49941	3.05007	0.00707651	0.038387	0.0269295	Ccl2/Coro1a/Cxcl1/Cxcl6/Dnase1l3/Fcgr2a/Il12b/RT1-CE1/RT1-CE16/RT1-S3	10	0.0212766
BP	GO:0002292	T cell differentiation involved in immune response	7/470	90/18913	0.0777778	3.12981	3.2331	0.00711182	0.0385334	0.0270323	Batf/Bcl3/Cd69/Il12b/Il6/Nfkbiz/Zc3h12a	7	0.0148936
BP	GO:0009749	response to glucose	16/470	323/18913	0.0495356	1.99333	2.87448	0.0071828	0.0388529	0.0272564	Ano1/Ccl2/Crhr2/Cyp19a1/Gipr/Gpr68/Il1b/Khk/Mir146a/Mir221/Mir222/Nos2/Pde1c/Ppargc1a/Slc2a3/Thbs1	16	0.0340426
BP	GO:0043123	positive regulation of canonical NF-kappaB signal transduction	12/470	213/18913	0.056338	2.26707	2.96873	0.00718754	0.0388529	0.0272564	Card10/Cd40/Cx3cl1/Hmox1/Il1a/Il1b/Nod2/Tgm2/Ticam2/Tmem106a/Tnf/Tnfsf15	12	0.0255319
BP	GO:1904659	D-glucose transmembrane transport	9/470	137/18913	0.0656934	2.64353	3.08204	0.00729651	0.0393458	0.0276022	C3/Ffar4/Hk2/Il1b/Slc1a2/Slc2a1/Slc2a3/Slc2a5/Tnf	9	0.0191489
BP	GO:0045620	negative regulation of lymphocyte differentiation	6/470	69/18913	0.0869565	3.49917	3.31998	0.00730417	0.0393458	0.0276022	Cd69/Dtx1/Id2/Pglyrp1/Pglyrp2/Zc3h12a	6	0.012766
BP	GO:0071470	cellular response to osmotic stress	6/470	69/18913	0.0869565	3.49917	3.31998	0.00730417	0.0393458	0.0276022	Bdkrb2/Ptgs2/Rcsd1/Scn7a/Slc2a1/Tspo	6	0.012766
BP	GO:0010563	negative regulation of phosphorus metabolic process	19/470	411/18913	0.0462287	1.86026	2.81478	0.00738772	0.0397036	0.0278532	Adora2a/Bdkrb1/Bdkrb2/Birc3/Cbfa2t3/Cda/Ddit4/Fabp4/Ier3/Il1b/Il6/Mapt/Mir146a/Mir27b/Ppargc1a/Tnf/Tnfaip3/Tspo/Zc3h12a	19	0.0404255
BP	GO:0045936	negative regulation of phosphate metabolic process	19/470	411/18913	0.0462287	1.86026	2.81478	0.00738772	0.0397036	0.0278532	Adora2a/Bdkrb1/Bdkrb2/Birc3/Cbfa2t3/Cda/Ddit4/Fabp4/Ier3/Il1b/Il6/Mapt/Mir146a/Mir27b/Ppargc1a/Tnf/Tnfaip3/Tspo/Zc3h12a	19	0.0404255
BP	GO:0019318	hexose metabolic process	14/470	268/18913	0.0522388	2.10211	2.90077	0.00740655	0.0397588	0.0278919	Aldoc/Eno2/Gpi/Hk2/Hk3/Il6/Khk/Npy1r/Pfkp/Pgk1/Ppargc1a/Ppp1r3b/Ppp1r3g/Tnf	14	0.0297872
BP	GO:0003333	amino acid transmembrane transport	8/470	114/18913	0.0701754	2.82389	3.11807	0.00761104	0.0408093	0.0286288	Grm1/Rgs4/Slc11a1/Slc1a1/Slc1a2/Slc1a6/Slc6a7/Tnf	8	0.0170213
BP	GO:0008645	hexose transmembrane transport	9/470	138/18913	0.0652174	2.62438	3.0573	0.00763951	0.0408203	0.0286366	C3/Ffar4/Hk2/Il1b/Slc1a2/Slc2a1/Slc2a3/Slc2a5/Tnf	9	0.0191489
BP	GO:0045446	endothelial cell differentiation	9/470	138/18913	0.0652174	2.62438	3.0573	0.00763951	0.0408203	0.0286366	Cldn1/Cxcr4/Hey1/Hpse/Il1b/Notch4/Stc1/Tnf/Vegfa	9	0.0191489
BP	GO:0051208	sequestering of calcium ion	9/470	138/18913	0.0652174	2.62438	3.0573	0.00763951	0.0408203	0.0286366	Atp7b/Bdkrb1/Ccl3/Coro1a/Cx3cl1/Cxcl10/Ero1a/Hap1/P2ry6	9	0.0191489
BP	GO:0003085	negative regulation of systemic arterial blood pressure	4/470	32/18913	0.125	5.03005	3.6423	0.00780442	0.0415679	0.029161	Adrb3/Apln/Ier3/Tnf	4	0.00851064
BP	GO:0090025	regulation of monocyte chemotaxis	4/470	32/18913	0.125	5.03005	3.6423	0.00780442	0.0415679	0.029161	Ccl2/Ccl5/Cxcl10/Pla2g7	4	0.00851064
BP	GO:0050714	positive regulation of protein secretion	11/470	189/18913	0.0582011	2.34204	2.96004	0.00780631	0.0415679	0.029161	Adora2a/Ankrd1/Ano1/Gipr/Gpr68/Hcar2/Il1a/Kcnn4/Mmp13/Nmu/Tlr2	11	0.0234043
BP	GO:0045912	negative regulation of carbohydrate metabolic process	6/470	70/18913	0.0857143	3.44918	3.27715	0.00782581	0.0415763	0.0291669	Cbfa2t3/Ddit4/Ier3/Il6/Ppargc1a/Ppp1r3b	6	0.012766
BP	GO:0140895	cell surface toll-like receptor signaling pathway	6/470	70/18913	0.0857143	3.44918	3.27715	0.00782581	0.0415763	0.0291669	Nfkbia/Nod2/Ticam2/Tlr2/Tnfaip3/Tnip3	6	0.012766
BP	GO:0045071	negative regulation of viral genome replication	5/470	50/18913	0.1	4.02404	3.41798	0.00784099	0.0416093	0.02919	Ccl5/Oasl/Rsad2/Slpi/Tnf	5	0.0106383
BP	GO:0015833	peptide transport	17/470	355/18913	0.0478873	1.92701	2.81471	0.00786881	0.0417092	0.0292601	Ano1/Apln/Ccl5/Crhr2/Ffar4/Gipr/Gnaz/Gpr68/Il1b/Il1rn/Il6/Nmu/Nos2/Pde1c/Sstr2/Stxbp5l/Tnf	17	0.0361702
BP	GO:0002695	negative regulation of leukocyte activation	12/470	216/18913	0.0555556	2.23558	2.9155	0.00799439	0.0419196	0.0294078	Adora2a/Cd69/Dtx1/Id2/Pglyrp1/Pglyrp2/Pla2g5/RT1-Bb/Tnfaip3/Tnfrsf14/Vsir/Zc3h12a	12	0.0255319
BP	GO:0002396	MHC protein complex assembly	3/470	17/18913	0.176471	7.10125	4.01754	0.00799953	0.0419196	0.0294078	RT1-Bb/RT1-CE16/RT1-DMb	3	0.00638298
BP	GO:0002501	peptide antigen assembly with MHC protein complex	3/470	17/18913	0.176471	7.10125	4.01754	0.00799953	0.0419196	0.0294078	RT1-Bb/RT1-CE16/RT1-DMb	3	0.00638298
BP	GO:0002830	positive regulation of type 2 immune response	3/470	17/18913	0.176471	7.10125	4.01754	0.00799953	0.0419196	0.0294078	Il6/Nod2/Rsad2	3	0.00638298
BP	GO:0033083	regulation of immature T cell proliferation	3/470	17/18913	0.176471	7.10125	4.01754	0.00799953	0.0419196	0.0294078	Il1a/Il1b/Tnfrsf9	3	0.00638298
BP	GO:0061620	glycolytic process through glucose-6-phosphate	3/470	17/18913	0.176471	7.10125	4.01754	0.00799953	0.0419196	0.0294078	Eno2/Pfkp/Pgk1	3	0.00638298
BP	GO:0071318	cellular response to ATP	3/470	17/18913	0.176471	7.10125	4.01754	0.00799953	0.0419196	0.0294078	Abcc9/Ccl2/Ptgs2	3	0.00638298
BP	GO:0071639	positive regulation of monocyte chemotactic protein-1 production	3/470	17/18913	0.176471	7.10125	4.01754	0.00799953	0.0419196	0.0294078	Il1b/Nod2/Syk	3	0.00638298
BP	GO:0072014	proximal tubule development	3/470	17/18913	0.176471	7.10125	4.01754	0.00799953	0.0419196	0.0294078	Anpep/Heyl/Slc2a5	3	0.00638298
BP	GO:2000833	positive regulation of steroid hormone secretion	3/470	17/18913	0.176471	7.10125	4.01754	0.00799953	0.0419196	0.0294078	Cyp19a1/Il6/Tnf	3	0.00638298
BP	GO:0006022	aminoglycan metabolic process	8/470	115/18913	0.0695652	2.79933	3.08963	0.00800793	0.0419196	0.0294078	B3gnt3/B3gnt6/Chi3l1/Hpse/Il1b/Ndst3/Pglyrp1/Pglyrp2	8	0.0170213
BP	GO:0009266	response to temperature stimulus	11/470	190/18913	0.0578947	2.32971	2.94068	0.00810708	0.0423908	0.0297383	Adrb3/Ano1/Cidea/Cxcl10/Cxcr4/Hmox1/Il1a/Mapt/Ngfr/Ntrk1/Ptgs2	11	0.0234043
BP	GO:0050918	positive chemotaxis	6/470	71/18913	0.084507	3.4006	3.2351	0.00837374	0.0437358	0.0306819	Ccl3/Ccl5/Coro1a/Cx3cl1/Cxcl10/Vegfa	6	0.012766
BP	GO:0006941	striated muscle contraction	11/470	191/18913	0.0575916	2.31751	2.92144	0.00841678	0.0438794	0.0307826	Abcc9/Cacna1h/Cxcr4/Dsc2/Myh1/Myh3/Rcsd1/Stac2/Stc1/Tnf/Zc3h12a	11	0.0234043
BP	GO:0002377	immunoglobulin production	8/470	116/18913	0.0689655	2.7752	3.0615	0.00842015	0.0438794	0.0307826	Batf/Cd28/Cd40/Gpi/Il6/Nfkbiz/RT1-Bb/Tnf	8	0.0170213
BP	GO:0030851	granulocyte differentiation	5/470	51/18913	0.0980392	3.94514	3.36201	0.00852003	0.0441026	0.0309392	Cbfa2t3/Csf2/Cyp19a1/Ikzf1/Rbp1	5	0.0106383
BP	GO:0032620	interleukin-17 production	5/470	51/18913	0.0980392	3.94514	3.36201	0.00852003	0.0441026	0.0309392	Il12b/Il6/Nod2/Tlr2/Vsir	5	0.0106383
BP	GO:0032660	regulation of interleukin-17 production	5/470	51/18913	0.0980392	3.94514	3.36201	0.00852003	0.0441026	0.0309392	Il12b/Il6/Nod2/Tlr2/Vsir	5	0.0106383
BP	GO:0046688	response to copper ion	5/470	51/18913	0.0980392	3.94514	3.36201	0.00852003	0.0441026	0.0309392	Atp7b/Cyp1a1/Il1a/Mt1/Mt2A	5	0.0106383
BP	GO:0071402	cellular response to lipoprotein particle stimulus	5/470	51/18913	0.0980392	3.94514	3.36201	0.00852003	0.0441026	0.0309392	Ccl2/Ccl5/Mir146a/Mmp9/Syk	5	0.0106383
BP	GO:0098586	cellular response to virus	5/470	51/18913	0.0980392	3.94514	3.36201	0.00852003	0.0441026	0.0309392	Cxcl10/Il6/Mir146a/Mmp12/Zc3h12a	5	0.0106383
BP	GO:0071383	cellular response to steroid hormone stimulus	14/470	273/18913	0.0512821	2.06361	2.82581	0.00864288	0.0446886	0.0313503	Ass1/Ccl2/Crhr2/Ddit4/Hey1/Heyl/Il6/Kdm3a/Mgarp/RT1-Bb/Serpina3n/Sstr2/Stc1/Vegfa	14	0.0297872
BP	GO:0032368	regulation of lipid transport	10/470	166/18913	0.060241	2.42412	2.94196	0.00869695	0.0447361	0.0313836	Cyp19a1/Il1a/Il1b/Il6/Mir27b/Nfkbia/Syk/Thbs1/Tnf/Tspo	10	0.0212766
BP	GO:0001963	synaptic transmission, dopaminergic	4/470	33/18913	0.121212	4.87763	3.55897	0.00870995	0.0447361	0.0313836	Adora2a/Aph1b/Ptgs2/Rasd2	4	0.00851064
BP	GO:0016048	detection of temperature stimulus	4/470	33/18913	0.121212	4.87763	3.55897	0.00870995	0.0447361	0.0313836	Ano1/Cxcr4/Ngfr/Ntrk1	4	0.00851064
BP	GO:0035864	response to potassium ion	4/470	33/18913	0.121212	4.87763	3.55897	0.00870995	0.0447361	0.0313836	Abcc9/Acta1/Cacna1h/Ppargc1a	4	0.00851064
BP	GO:0048714	positive regulation of oligodendrocyte differentiation	4/470	33/18913	0.121212	4.87763	3.55897	0.00870995	0.0447361	0.0313836	Cxcr4/Il34/Ptprz1/Tlr2	4	0.00851064
BP	GO:1902042	negative regulation of extrinsic apoptotic signaling pathway via death domain receptors	4/470	33/18913	0.121212	4.87763	3.55897	0.00870995	0.0447361	0.0313836	Hmox1/Mir221/Mir222/Tnfaip3	4	0.00851064
BP	GO:0015695	organic cation transport	9/470	141/18913	0.0638298	2.56854	2.98436	0.00874259	0.0447551	0.0313969	Adora2a/Crhr2/Htr6/Rgs4/Slc11a1/Slc1a1/Slc1a2/Slc44a3/Slc6a7	9	0.0191489
BP	GO:0015749	monosaccharide transmembrane transport	9/470	141/18913	0.0638298	2.56854	2.98436	0.00874259	0.0447551	0.0313969	C3/Ffar4/Hk2/Il1b/Slc1a2/Slc2a1/Slc2a3/Slc2a5/Tnf	9	0.0191489
BP	GO:0099565	chemical synaptic transmission, postsynaptic	9/470	141/18913	0.0638298	2.56854	2.98436	0.00874259	0.0447551	0.0313969	Adora2a/Chrna4/Cx3cl1/Gria2/Grin1/Grin2c/Ngfr/P2rx6/Rgs4	9	0.0191489
BP	GO:0045055	regulated exocytosis	14/470	274/18913	0.0510949	2.05608	2.81101	0.00890866	0.045555	0.0319581	Cacna1h/Cacna1i/Ccl3/Coro1a/Doc2a/Hmox1/Npy1r/Rab26/Sptbn2/Stxbp5l/Syk/Syngr3/Syt15/Syt17	14	0.0297872
BP	GO:1905953	negative regulation of lipid localization	6/470	72/18913	0.0833333	3.35337	3.19379	0.00894866	0.0457091	0.0320662	Clstn3/Mir146a/Mir27b/Nfkbia/Thbs1/Tspo	6	0.012766
BP	GO:1903305	regulation of regulated secretory pathway	10/470	167/18913	0.0598802	2.40961	2.92081	0.00905266	0.0461895	0.0324032	Cacna1h/Cacna1i/Doc2a/Hmox1/Npy1r/Sptbn2/Stxbp5l/Syk/Syt15/Syt17	10	0.0212766
BP	GO:0008544	epidermis development	18/470	390/18913	0.0461538	1.85725	2.73078	0.00912172	0.0464907	0.0326145	Cers3/Cldn1/Evpl/Fst/Hey1/Hpse/Il1a/Jag2/Kcnma1/Lce1m/Maff/Mcoln3/Nfkbiz/Ngfr/Sostdc1/Sult2b1/Tnf/Wnt10b	18	0.0382979
BP	GO:0009582	detection of abiotic stimulus	9/470	142/18913	0.0633803	2.55045	2.96047	0.00913587	0.0465117	0.0326292	Adgrv1/Ano1/Cxcr4/Grk1/Ngfr/Ntrk1/Otop1/Phf24/Tnf	9	0.0191489
BP	GO:0006109	regulation of carbohydrate metabolic process	12/470	220/18913	0.0545455	2.19493	2.84588	0.00917864	0.0466383	0.0327181	Adcyap1r1/Cbfa2t3/Ddit4/Hsd11b1/Ier3/Il6/Khk/P2ry6/Ppargc1a/Ppp1r3b/Ppp1r3c/Ppp1r3g	12	0.0255319
BP	GO:0048762	mesenchymal cell differentiation	14/470	275/18913	0.0509091	2.0486	2.79627	0.00918085	0.0466383	0.0327181	Frzb/Hey1/Heyl/Il1b/Il6/Mir221/Mir222/Notch4/Nrtn/Osr1/Ret/Tgfbr3/Vegfa/Wnt4	14	0.0297872
BP	GO:0043114	regulation of vascular permeability	5/470	52/18913	0.0961538	3.86927	3.30745	0.00923869	0.0467274	0.0327806	Adm/Adora2a/Ccl4/Plvap/Vegfa	5	0.0106383
BP	GO:0048265	response to pain	5/470	52/18913	0.0961538	3.86927	3.30745	0.00923869	0.0467274	0.0327806	Gch1/Ntrk1/Ret/Thbs1/Tspo	5	0.0106383
BP	GO:0072538	T-helper 17 type immune response	5/470	52/18913	0.0961538	3.86927	3.30745	0.00923869	0.0467274	0.0327806	Batf/Cd69/Il6/Nfkbiz/Zc3h12a	5	0.0106383
BP	GO:1902041	regulation of extrinsic apoptotic signaling pathway via death domain receptors	5/470	52/18913	0.0961538	3.86927	3.30745	0.00923869	0.0467274	0.0327806	Hmox1/Mir221/Mir222/Thbs1/Tnfaip3	5	0.0106383
BP	GO:0045666	positive regulation of neuron differentiation	8/470	118/18913	0.0677966	2.72816	3.00612	0.00929202	0.046946	0.0329339	Ccl5/Dab1/Gdf5/Heyl/Il6/Kctd11/Ngfr/Rgs6	8	0.0170213
BP	GO:0010212	response to ionizing radiation	11/470	194/18913	0.056701	2.28167	2.86443	0.00940116	0.0472562	0.0331515	Ccl2/Ccl7/Cxcl1/Cxcl10/Cxcl2/Cxcl6/Cyp19a1/Il1a/Il1b/Lcn2/Tnf	11	0.0234043
BP	GO:0001820	serotonin secretion	3/470	18/18913	0.166667	6.70674	3.86681	0.00942475	0.0472562	0.0331515	Crhr2/Fcgr2a/Syk	3	0.00638298
BP	GO:0002468	dendritic cell antigen processing and presentation	3/470	18/18913	0.166667	6.70674	3.86681	0.00942475	0.0472562	0.0331515	Nod2/Slc11a1/Thbs1	3	0.00638298
BP	GO:0030730	sequestering of triglyceride	3/470	18/18913	0.166667	6.70674	3.86681	0.00942475	0.0472562	0.0331515	Cidea/Il1b/Tnf	3	0.00638298
BP	GO:0035743	CD4-positive, alpha-beta T cell cytokine production	3/470	18/18913	0.166667	6.70674	3.86681	0.00942475	0.0472562	0.0331515	Il1b/Il6/Rsad2	3	0.00638298
BP	GO:0070942	neutrophil mediated cytotoxicity	3/470	18/18913	0.166667	6.70674	3.86681	0.00942475	0.0472562	0.0331515	Cxcl1/Cxcl6/Dnase1l3	3	0.00638298
BP	GO:2000696	regulation of epithelial cell differentiation involved in kidney development	3/470	18/18913	0.166667	6.70674	3.86681	0.00942475	0.0472562	0.0331515	Mmp9/Osr1/Prom1	3	0.00638298
BP	GO:0050905	neuromuscular process	12/470	221/18913	0.0542986	2.185	2.82871	0.00949502	0.0475571	0.0333626	Adora2a/Aph1b/Gch1/Grin1/Grin2c/Kcnma1/Mdga2/Myh3/Rcsd1/Stac2/Tcf15/Tnf	12	0.0255319
BP	GO:0009581	detection of external stimulus	9/470	143/18913	0.0629371	2.53261	2.93677	0.0095424	0.0476331	0.0334159	Adgrv1/Ano1/Cxcr4/Grk1/Ngfr/Ntrk1/Otop1/Phf24/Tnf	9	0.0191489
BP	GO:0002712	regulation of B cell mediated immunity	6/470	73/18913	0.0821918	3.30743	3.1532	0.00955127	0.0476331	0.0334159	C3/Cd28/Cd40/Fcgr2a/Nod2/Tnf	6	0.012766
BP	GO:0002889	regulation of immunoglobulin mediated immune response	6/470	73/18913	0.0821918	3.30743	3.1532	0.00955127	0.0476331	0.0334159	C3/Cd28/Cd40/Fcgr2a/Nod2/Tnf	6	0.012766
BP	GO:0009620	response to fungus	6/470	73/18913	0.0821918	3.30743	3.1532	0.00955127	0.0476331	0.0334159	Cxcl1/Il6/Pla2g5/RT1-Bb/Syk/Tlr2	6	0.012766
BP	GO:0001779	natural killer cell differentiation	4/470	34/18913	0.117647	4.73417	3.47893	0.00968144	0.0480241	0.0336902	Id2/Ikzf1/Pglyrp1/Pglyrp2	4	0.00851064
BP	GO:0002313	mature B cell differentiation involved in immune response	4/470	34/18913	0.117647	4.73417	3.47893	0.00968144	0.0480241	0.0336902	Bcl3/Il6/Irf8/Nfkbiz	4	0.00851064
BP	GO:0007588	excretion	4/470	34/18913	0.117647	4.73417	3.47893	0.00968144	0.0480241	0.0336902	Bdkrb1/Crhr2/Kcnma1/Stc1	4	0.00851064
BP	GO:0015732	prostaglandin transport	4/470	34/18913	0.117647	4.73417	3.47893	0.00968144	0.0480241	0.0336902	Il1a/Il1b/Nos2/Ptgs2	4	0.00851064
BP	GO:1903859	regulation of dendrite extension	4/470	34/18913	0.117647	4.73417	3.47893	0.00968144	0.0480241	0.0336902	Cpne5/Cxcr4/Mir222/Syt17	4	0.00851064
BP	GO:1904950	negative regulation of establishment of protein localization	10/470	169/18913	0.0591716	2.38109	2.87896	0.0097974	0.0485474	0.0340573	Crhr2/Gnaz/Il12b/Il1b/Mapt/Mir146a/Pde1c/Rhbdf2/Rsad2/Stxbp5l	10	0.0212766
BP	GO:0030278	regulation of ossification	9/470	144/18913	0.0625	2.51503	2.91328	0.00996244	0.0492261	0.0345335	Adgrv1/Ccl3/Matn1/Mgp/Mir222/Osr1/Rsad2/Wnt10b/Wnt4	9	0.0191489
BP	GO:0002455	humoral immune response mediated by circulating immunoglobulin	5/470	53/18913	0.0943396	3.79627	3.25422	0.00999805	0.0492261	0.0345335	Bcl3/C1s/C3/Nod2/Tnf	5	0.0106383
BP	GO:0046636	negative regulation of alpha-beta T cell activation	5/470	53/18913	0.0943396	3.79627	3.25422	0.00999805	0.0492261	0.0345335	Adora2a/Cd69/Tnfrsf14/Vsir/Zc3h12a	5	0.0106383
BP	GO:0060412	ventricular septum morphogenesis	5/470	53/18913	0.0943396	3.79627	3.25422	0.00999805	0.0492261	0.0345335	Egln1/Hey1/Heyl/Id2/Tgfbr3	5	0.0106383
BP	GO:0090279	regulation of calcium ion import	5/470	53/18913	0.0943396	3.79627	3.25422	0.00999805	0.0492261	0.0345335	Ccl2/Crhr2/Cxcr4/Kcnn4/Stc1	5	0.0106383
BP	GO:1903351	cellular response to dopamine	5/470	53/18913	0.0943396	3.79627	3.25422	0.00999805	0.0492261	0.0345335	Htr6/Rgs4/Rgs9/Slc1a1/Tgm2	5	0.0106383
BP	GO:0006919	activation of cysteine-type endopeptidase activity involved in apoptotic process	6/470	74/18913	0.0810811	3.26274	3.11331	0.0101823	0.0500799	0.0351324	Egln3/Ngfr/Ret/Slc1a1/Tnf/Tnfsf15	6	0.012766
BP	GO:0044282	small molecule catabolic process	17/470	365/18913	0.0465753	1.87421	2.69226	0.0101978	0.0501032	0.0351488	Adh1c/Adh7/Akr1b10/Cda/Cyp1a1/Eno2/Faah/Hal/Hk2/Khk/Mfsd2a/Nos2/Pfkp/Pgk1/Qprt/Slc16a3/Upp1	17	0.0361702
BP	GO:0045685	regulation of glial cell differentiation	7/470	97/18913	0.0721649	2.90395	3.00109	0.0105585	0.0518206	0.0363536	Cxcr4/Dab1/Id2/Il1b/Il34/Ptprz1/Tlr2	7	0.0148936
BP	GO:0002478	antigen processing and presentation of exogenous peptide antigen	4/470	35/18913	0.114286	4.59891	3.40195	0.0107207	0.0520109	0.0364871	Fcgr2a/RT1-Bb/RT1-CE16/RT1-DMb	4	0.00851064
BP	GO:0007097	nuclear migration	4/470	35/18913	0.114286	4.59891	3.40195	0.0107207	0.0520109	0.0364871	Efcc1/Kif1a/Ntn1/Slit1	4	0.00851064
BP	GO:0050482	arachidonate secretion	4/470	35/18913	0.114286	4.59891	3.40195	0.0107207	0.0520109	0.0364871	Bdkrb2/Pla2g2a/Pla2g5/Syk	4	0.00851064
BP	GO:0050999	regulation of nitric-oxide synthase activity	4/470	35/18913	0.114286	4.59891	3.40195	0.0107207	0.0520109	0.0364871	Gch1/Il1a/Il1b/Tnf	4	0.00851064
BP	GO:0061744	motor behavior	4/470	35/18913	0.114286	4.59891	3.40195	0.0107207	0.0520109	0.0364871	Grpr/Mdga2/Mfsd2a/Slc1a1	4	0.00851064
BP	GO:0062098	regulation of programmed necrotic cell death	4/470	35/18913	0.114286	4.59891	3.40195	0.0107207	0.0520109	0.0364871	Birc3/Mir101a/Mir221/Tspo	4	0.00851064
BP	GO:0072012	glomerulus vasculature development	4/470	35/18913	0.114286	4.59891	3.40195	0.0107207	0.0520109	0.0364871	Acta1/Acta2/Actg2/Osr1	4	0.00851064
BP	GO:0120255	olefinic compound biosynthetic process	4/470	35/18913	0.114286	4.59891	3.40195	0.0107207	0.0520109	0.0364871	Cacna1h/Cyp19a1/Ppargc1a/Wnt4	4	0.00851064
BP	GO:1901099	negative regulation of signal transduction in absence of ligand	4/470	35/18913	0.114286	4.59891	3.40195	0.0107207	0.0520109	0.0364871	Csf2/Cx3cl1/Il1b/Tnf	4	0.00851064
BP	GO:1903963	arachidonate transport	4/470	35/18913	0.114286	4.59891	3.40195	0.0107207	0.0520109	0.0364871	Bdkrb2/Pla2g2a/Pla2g5/Syk	4	0.00851064
BP	GO:2001240	negative regulation of extrinsic apoptotic signaling pathway in absence of ligand	4/470	35/18913	0.114286	4.59891	3.40195	0.0107207	0.0520109	0.0364871	Csf2/Cx3cl1/Il1b/Tnf	4	0.00851064
BP	GO:1904646	cellular response to amyloid-beta	5/470	54/18913	0.0925926	3.72597	3.20228	0.0107992	0.052337	0.0367158	Lcn2/Mir146a/Ngfr/Syk/Tnf	5	0.0106383
BP	GO:0002752	cell surface pattern recognition receptor signaling pathway	6/470	75/18913	0.08	3.21923	3.0741	0.0108423	0.0523819	0.0367473	Nfkbia/Nod2/Ticam2/Tlr2/Tnfaip3/Tnip3	6	0.012766
BP	GO:0006940	regulation of smooth muscle contraction	6/470	75/18913	0.08	3.21923	3.0741	0.0108423	0.0523819	0.0367473	Bdkrb1/Gucy1a1/Irag1/Kcnma1/Nmu/Ptgs2	6	0.012766
BP	GO:0050994	regulation of lipid catabolic process	6/470	75/18913	0.08	3.21923	3.0741	0.0108423	0.0523819	0.0367473	Cidea/Clstn3/Hcar2/Il1b/Mfsd2a/Tnf	6	0.012766
BP	GO:0006704	glucocorticoid biosynthetic process	3/470	19/18913	0.157895	6.35375	3.72713	0.0109885	0.0526495	0.036935	Cacna1h/Hsd11b1/Wnt4	3	0.00638298
BP	GO:0019677	NAD catabolic process	3/470	19/18913	0.157895	6.35375	3.72713	0.0109885	0.0526495	0.036935	Eno2/Pfkp/Pgk1	3	0.00638298
BP	GO:0035795	negative regulation of mitochondrial membrane permeability	3/470	19/18913	0.157895	6.35375	3.72713	0.0109885	0.0526495	0.036935	Bnip3/Hk2/Ier3	3	0.00638298
BP	GO:0045651	positive regulation of macrophage differentiation	3/470	19/18913	0.157895	6.35375	3.72713	0.0109885	0.0526495	0.036935	Csf2/Id2/Il34	3	0.00638298
BP	GO:0045779	negative regulation of bone resorption	3/470	19/18913	0.157895	6.35375	3.72713	0.0109885	0.0526495	0.036935	Cyp19a1/Il6/Vegfa	3	0.00638298
BP	GO:0060134	prepulse inhibition	3/470	19/18913	0.157895	6.35375	3.72713	0.0109885	0.0526495	0.036935	Adora2a/Aph1b/Grin1	3	0.00638298
BP	GO:0072087	renal vesicle development	3/470	19/18913	0.157895	6.35375	3.72713	0.0109885	0.0526495	0.036935	Hey1/Osr1/Wnt4	3	0.00638298
BP	GO:1901163	regulation of trophoblast cell migration	3/470	19/18913	0.157895	6.35375	3.72713	0.0109885	0.0526495	0.036935	Arhgdib/Mmp12/Vegfa	3	0.00638298
BP	GO:0051222	positive regulation of protein transport	15/470	310/18913	0.0483871	1.94712	2.68408	0.011089	0.0530763	0.0372345	Adora2a/Ankrd1/Ano1/Gipr/Gpr68/Hcar2/Il1a/Il6/Kcnn4/Mmp13/Nmu/Ptgs2/Tlr2/Tnf/Zc3h12a	15	0.0319149
BP	GO:0010596	negative regulation of endothelial cell migration	7/470	98/18913	0.0714286	2.87432	2.96965	0.0111352	0.0532423	0.0373509	Card10/Mir101a/Mir146a/Mir221/Stc1/Thbs1/Tnf	7	0.0148936
BP	GO:0048639	positive regulation of developmental growth	12/470	226/18913	0.0530973	2.13666	2.74421	0.011206	0.0535258	0.0375498	C3/Cpne5/Cxcr4/Dcx/Hopx/Ikzf1/Mapt/Mir222/Ntn1/Syt17/Tgfbr3/Vegfa	12	0.0255319
BP	GO:0071496	cellular response to external stimulus	9/470	147/18913	0.0612245	2.4637	2.84398	0.0113063	0.0539494	0.037847	Ankrd1/Bnip3/Cd40/Cda/Il1b/Kcnj4/Ptgs2/Slc2a1/Vegfa	9	0.0191489
BP	GO:0006887	exocytosis	18/470	399/18913	0.0451128	1.81536	2.62776	0.011343	0.0540689	0.0379308	Cacna1h/Cacna1i/Ccl3/Ccl5/Coro1a/Doc2a/Hap1/Hmox1/Npy1r/Rab26/Septin4/Sptbn2/Stxbp5l/Syk/Syngr3/Syt15/Syt17/Sytl3	18	0.0382979
BP	GO:0050796	regulation of insulin secretion	12/470	227/18913	0.0528634	2.12725	2.72757	0.0115751	0.0551182	0.038667	Ano1/Ccl5/Crhr2/Gipr/Gnaz/Gpr68/Il1b/Il6/Nos2/Pde1c/Stxbp5l/Tnf	12	0.0255319
BP	GO:0030534	adult behavior	11/470	200/18913	0.055	2.21322	2.75351	0.0116343	0.0552715	0.0387745	Adh1c/Chrna4/Dab1/Grin1/Id2/Kcnma1/Mapt/Nrxn2/Slc1a1/Slc1a2/Sptbn2	11	0.0234043
BP	GO:0061028	establishment of endothelial barrier	5/470	55/18913	0.0909091	3.65822	3.15157	0.011643	0.0552715	0.0387745	Cldn1/Hpse/Il1b/Tnf/Vegfa	5	0.0106383
BP	GO:1903350	response to dopamine	5/470	55/18913	0.0909091	3.65822	3.15157	0.011643	0.0552715	0.0387745	Htr6/Rgs4/Rgs9/Slc1a1/Tgm2	5	0.0106383
BP	GO:0061448	connective tissue development	16/470	341/18913	0.0469208	1.88811	2.64191	0.0116815	0.0553974	0.0388628	Abhd15/Acta1/Acta2/Actg2/Frzb/Gdf5/Id2/Il17f/Matn1/Mgp/Mmp13/Osr1/Ppargc1a/Stc1/Thbs1/Wnt10b	16	0.0340426
BP	GO:0045088	regulation of innate immune response	20/470	461/18913	0.0433839	1.74579	2.58789	0.0117475	0.055643	0.0390351	Fosl1/Gbp7/Il12b/Mir146a/Mmp12/Nfkbia/Nfkbiz/Nod2/Oasl/Otop1/Pla2g5/RT1-CE16/Rsad2/Syk/Ticam2/Tlr2/Tnf/Tnfaip3/Tnip3/Usp18	20	0.0425532
BP	GO:0003416	endochondral bone growth	4/470	36/18913	0.111111	4.47116	3.32783	0.0118292	0.055643	0.0390351	Matn1/Mmp13/Stc1/Thbs1	4	0.00851064
BP	GO:0010042	response to manganese ion	4/470	36/18913	0.111111	4.47116	3.32783	0.0118292	0.055643	0.0390351	Atp7b/Grin1/Ptgs2/Tspo	4	0.00851064
BP	GO:0030224	monocyte differentiation	4/470	36/18913	0.111111	4.47116	3.32783	0.0118292	0.055643	0.0390351	Csf2/Gpr68/Il34/Vegfa	4	0.00851064
BP	GO:0035929	steroid hormone secretion	4/470	36/18913	0.111111	4.47116	3.32783	0.0118292	0.055643	0.0390351	Cyp19a1/Il6/Tnf/Tspo	4	0.00851064
BP	GO:0045472	response to ether	4/470	36/18913	0.111111	4.47116	3.32783	0.0118292	0.055643	0.0390351	Adm/Cyp1a1/Ppargc1a/Zc3h12a	4	0.00851064
BP	GO:1900745	positive regulation of p38MAPK cascade	4/470	36/18913	0.111111	4.47116	3.32783	0.0118292	0.055643	0.0390351	Il1b/Kcnn4/Vegfa/Zc3h12a	4	0.00851064
BP	GO:1902932	positive regulation of alcohol biosynthetic process	4/470	36/18913	0.111111	4.47116	3.32783	0.0118292	0.055643	0.0390351	Adcyap1r1/Npy1r/P2ry6/Wnt4	4	0.00851064
BP	GO:0051961	negative regulation of nervous system development	10/470	174/18913	0.0574713	2.31267	2.77689	0.0118636	0.0557482	0.0391089	Clstn3/Dab1/Id2/Il1b/Kctd11/Mir146a/Ntn1/Slit1/Tlr2/Tspo	10	0.0212766
BP	GO:0006066	alcohol metabolic process	17/470	372/18913	0.0456989	1.83894	2.60879	0.0121321	0.0569519	0.0399533	Adcyap1r1/Adh1c/Adh6/Adh7/Akr1b10/Cacna1h/Cyp1a1/Gch1/Gpr146/Kcnma1/Mogat1/Npy1r/P2ry6/Rbp1/Rbp2/Sult2b1/Wnt4	17	0.0361702
BP	GO:0043537	negative regulation of blood vessel endothelial cell migration	6/470	77/18913	0.0779221	3.13562	2.99762	0.0122522	0.0572842	0.0401864	Card10/Mir101a/Mir146a/Mir221/Thbs1/Tnf	6	0.012766
BP	GO:0045744	negative regulation of G protein-coupled receptor signaling pathway	6/470	77/18913	0.0779221	3.13562	2.99762	0.0122522	0.0572842	0.0401864	Adm/Apln/Ccl5/Gipr/Mir101a/Rgs4	6	0.012766
BP	GO:0051057	positive regulation of small GTPase mediated signal transduction	6/470	77/18913	0.0779221	3.13562	2.99762	0.0122522	0.0572842	0.0401864	Adcyap1r1/Ngfr/Ntrk1/Rasgef1a/Rasgrf1/Tgm2	6	0.012766
BP	GO:0090278	negative regulation of peptide hormone secretion	6/470	77/18913	0.0779221	3.13562	2.99762	0.0122522	0.0572842	0.0401864	Crhr2/Ffar4/Gnaz/Pde1c/Sstr2/Stxbp5l	6	0.012766
BP	GO:0060079	excitatory postsynaptic potential	8/470	124/18913	0.0645161	2.59616	2.84666	0.0123124	0.0575073	0.0403429	Adora2a/Chrna4/Gria2/Grin1/Grin2c/Ngfr/P2rx6/Rgs4	8	0.0170213
BP	GO:0061383	trabecula morphogenesis	5/470	56/18913	0.0892857	3.5929	3.10202	0.0125306	0.0584677	0.0410167	Egln1/Hey1/Tgfbr3/Vegfa/Wnt10b	5	0.0106383
BP	GO:0034764	positive regulation of transmembrane transport	14/470	286/18913	0.048951	1.96981	2.63816	0.0126282	0.0586357	0.0411345	Adcyap1r1/Bdkrb1/C3/Ccl2/Cx3cl1/Cxcl10/Grin1/Hap1/Kcnmb1/Lcn2/P2ry6/Rgs9/Slc1a2/Stac2	14	0.0297872
BP	GO:0003159	morphogenesis of an endothelium	3/470	20/18913	0.15	6.03606	3.59714	0.012693	0.0586357	0.0411345	Cxcl10/Cxcr4/Lcn2	3	0.00638298
BP	GO:0045064	T-helper 2 cell differentiation	3/470	20/18913	0.15	6.03606	3.59714	0.012693	0.0586357	0.0411345	Batf/Bcl3/Il6	3	0.00638298
BP	GO:0045906	negative regulation of vasoconstriction	3/470	20/18913	0.15	6.03606	3.59714	0.012693	0.0586357	0.0411345	Adm/Apln/Cx3cl1	3	0.00638298
BP	GO:0061154	endothelial tube morphogenesis	3/470	20/18913	0.15	6.03606	3.59714	0.012693	0.0586357	0.0411345	Cxcl10/Cxcr4/Lcn2	3	0.00638298
BP	GO:0061450	trophoblast cell migration	3/470	20/18913	0.15	6.03606	3.59714	0.012693	0.0586357	0.0411345	Arhgdib/Mmp12/Vegfa	3	0.00638298
BP	GO:0070431	nucleotide-binding oligomerization domain containing 2 signaling pathway	3/470	20/18913	0.15	6.03606	3.59714	0.012693	0.0586357	0.0411345	Nfkbia/Nod2/Tnfaip3	3	0.00638298
BP	GO:0071294	cellular response to zinc ion	3/470	20/18913	0.15	6.03606	3.59714	0.012693	0.0586357	0.0411345	Mt1/Mt2A/Tspo	3	0.00638298
BP	GO:0072540	T-helper 17 cell lineage commitment	3/470	20/18913	0.15	6.03606	3.59714	0.012693	0.0586357	0.0411345	Batf/Cd69/Il6	3	0.00638298
BP	GO:1905809	negative regulation of synapse organization	3/470	20/18913	0.15	6.03606	3.59714	0.012693	0.0586357	0.0411345	Clstn3/Slit1/Tlr2	3	0.00638298
BP	GO:0007519	skeletal muscle tissue development	12/470	230/18913	0.0521739	2.0995	2.67817	0.0127385	0.0587873	0.0412409	Abcc9/Acta1/Ankrd1/Ckmt1/Col19a1/Crhr2/Ero1a/Heyl/Klhl40/Maff/Ngfr/Wnt10b	12	0.0255319
BP	GO:0006937	regulation of muscle contraction	10/470	176/18913	0.0568182	2.28639	2.73703	0.0127764	0.0589033	0.0413223	Bdkrb1/Cacna1h/Dsc2/Gucy1a1/Irag1/Kcnma1/Nmu/Ptgs2/Stc1/Zc3h12a	10	0.0212766
BP	GO:1902106	negative regulation of leukocyte differentiation	8/470	125/18913	0.064	2.57539	2.82101	0.0128785	0.0593151	0.0416111	Ccl3/Cd69/Dtx1/Gpr68/Id2/Pglyrp1/Pglyrp2/Zc3h12a	8	0.0170213
BP	GO:0071549	cellular response to dexamethasone stimulus	6/470	78/18913	0.0769231	3.09542	2.96031	0.0130034	0.0595603	0.0417832	Ass1/Ccl2/Ddit4/Il6/RT1-Bb/Vegfa	6	0.012766
BP	GO:0014046	dopamine secretion	4/470	37/18913	0.108108	4.35032	3.25637	0.0130087	0.0595603	0.0417832	Chrna4/Htr6/Kcna2/Tgm2	4	0.00851064
BP	GO:0061437	renal system vasculature development	4/470	37/18913	0.108108	4.35032	3.25637	0.0130087	0.0595603	0.0417832	Acta1/Acta2/Actg2/Osr1	4	0.00851064
BP	GO:0061440	kidney vasculature development	4/470	37/18913	0.108108	4.35032	3.25637	0.0130087	0.0595603	0.0417832	Acta1/Acta2/Actg2/Osr1	4	0.00851064
BP	GO:0071676	negative regulation of mononuclear cell migration	4/470	37/18913	0.108108	4.35032	3.25637	0.0130087	0.0595603	0.0417832	Ccl2/Cd69/Cyp19a1/Mir146a	4	0.00851064
BP	GO:1904893	negative regulation of receptor signaling pathway via STAT	4/470	37/18913	0.108108	4.35032	3.25637	0.0130087	0.0595603	0.0417832	Bcl3/Dab1/Gbp7/Mir146a	4	0.00851064
BP	GO:0031669	cellular response to nutrient levels	15/470	316/18913	0.0474684	1.91015	2.60457	0.0130258	0.0595797	0.0417968	Acp5/Ccl5/Dsc2/Higd1a/Hmox1/Il6/Lcn2/Mfsd2a/Nos2/Rnf152/Rragd/Slc2a1/Upp1/Wnt4/Zc3h12a	15	0.0319149
BP	GO:0045089	positive regulation of innate immune response	17/470	375/18913	0.0453333	1.82423	2.57357	0.0130448	0.0596078	0.0418165	Fosl1/Gbp7/Il12b/Mir146a/Mmp12/Nfkbia/Nfkbiz/Nod2/Oasl/Pla2g5/Rsad2/Syk/Ticam2/Tlr2/Tnf/Tnfaip3/Tnip3	17	0.0361702
BP	GO:0051224	negative regulation of protein transport	9/470	151/18913	0.0596026	2.39844	2.75419	0.0133038	0.0607313	0.0426047	Crhr2/Gnaz/Il12b/Il1b/Mir146a/Pde1c/Rhbdf2/Rsad2/Stxbp5l	9	0.0191489
BP	GO:0030879	mammary gland development	11/470	204/18913	0.0539216	2.16983	2.68172	0.0133341	0.0608096	0.0426596	Atp7b/Ccl2/Cyp19a1/Hk2/Id2/Mir222/Notch4/Ntn1/Sostdc1/Vegfa/Wnt4	11	0.0234043
BP	GO:0006636	unsaturated fatty acid biosynthetic process	5/470	57/18913	0.0877193	3.52986	3.05359	0.0134629	0.0611567	0.0429031	Akr1c15/Bdkrb1/Il1b/Pla2g2a/Ptgs2	5	0.0106383
BP	GO:0043457	regulation of cellular respiration	5/470	57/18913	0.0877193	3.52986	3.05359	0.0134629	0.0611567	0.0429031	Ak4/Bnip3/Cbfa2t3/Cimap2/Tnf	5	0.0106383
BP	GO:0048713	regulation of oligodendrocyte differentiation	5/470	57/18913	0.0877193	3.52986	3.05359	0.0134629	0.0611567	0.0429031	Cxcr4/Id2/Il34/Ptprz1/Tlr2	5	0.0106383
BP	GO:0050974	detection of mechanical stimulus involved in sensory perception	5/470	57/18913	0.0877193	3.52986	3.05359	0.0134629	0.0611567	0.0429031	Adgrv1/Cxcr4/Ntrk1/Phf24/Tnf	5	0.0106383
BP	GO:0006140	regulation of nucleotide metabolic process	7/470	102/18913	0.0686275	2.7616	2.84776	0.0136714	0.0619217	0.0434398	Cbfa2t3/Cda/Ddit4/Hsd11b1/Ier3/Ppargc1a/Tspo	7	0.0148936
BP	GO:0033077	T cell differentiation in thymus	7/470	102/18913	0.0686275	2.7616	2.84776	0.0136714	0.0619217	0.0434398	Cd28/Il1a/Il1b/Jag2/Tnfrsf9/Wnt4/Zap70	7	0.0148936
BP	GO:0050848	regulation of calcium-mediated signaling	7/470	102/18913	0.0686275	2.7616	2.84776	0.0136714	0.0619217	0.0434398	Ccl3/Ccl4/Egln1/Mapt/Syk/Tnf/Zap70	7	0.0148936
BP	GO:0002224	toll-like receptor signaling pathway	6/470	79/18913	0.0759494	3.05623	2.92359	0.0137863	0.06226	0.0436771	Fosl1/Mir146a/Nfkbiz/Ticam2/Tlr2/Tnip3	6	0.012766
BP	GO:0002792	negative regulation of peptide secretion	6/470	79/18913	0.0759494	3.05623	2.92359	0.0137863	0.06226	0.0436771	Crhr2/Ffar4/Gnaz/Pde1c/Sstr2/Stxbp5l	6	0.012766
BP	GO:0045600	positive regulation of fat cell differentiation	6/470	79/18913	0.0759494	3.05623	2.92359	0.0137863	0.06226	0.0436771	Ccdc3/Ffar4/Frzb/Id2/Ptgs2/Zc3h12a	6	0.012766
BP	GO:0002444	myeloid leukocyte mediated immunity	8/470	127/18913	0.0629921	2.53483	2.77043	0.0140675	0.0634678	0.0445244	C3/Ccl3/Cxcl1/Cxcl6/Dnase1l3/Fcgr2a/Hmox1/Syk	8	0.0170213
BP	GO:0045580	regulation of T cell differentiation	10/470	179/18913	0.0558659	2.24807	2.67825	0.0142432	0.0641361	0.0449932	Cd28/Cd69/Dtx1/Il6/Nfkbiz/Syk/Vsir/Wnt10b/Zap70/Zc3h12a	10	0.0212766
BP	GO:1904064	positive regulation of cation transmembrane transport	10/470	179/18913	0.0558659	2.24807	2.67825	0.0142432	0.0641361	0.0449932	Adcyap1r1/Bdkrb1/Cx3cl1/Cxcl10/Grin1/Hap1/Kcnmb1/Lcn2/P2ry6/Stac2	10	0.0212766
BP	GO:0007271	synaptic transmission, cholinergic	4/470	38/18913	0.105263	4.23583	3.1874	0.0142606	0.0641521	0.0450045	Adora2a/Chrna4/Htr6/Ngfr	4	0.00851064
BP	GO:0030183	B cell differentiation	9/470	153/18913	0.0588235	2.36708	2.71036	0.0143954	0.0644098	0.0451852	Bcl3/Id2/Ikzf1/Il6/Irf8/Nfkbiz/Ntrk1/RT1-Bb/Syk	9	0.0191489
BP	GO:0050433	regulation of catecholamine secretion	5/470	58/18913	0.0862069	3.469	3.00624	0.0144408	0.0644098	0.0451852	Adora2a/Chrna4/Crhr2/Htr6/Kcna2	5	0.0106383
BP	GO:0050850	positive regulation of calcium-mediated signaling	5/470	58/18913	0.0862069	3.469	3.00624	0.0144408	0.0644098	0.0451852	Ccl3/Ccl4/Syk/Tnf/Zap70	5	0.0106383
BP	GO:1902895	positive regulation of miRNA transcription	5/470	58/18913	0.0862069	3.469	3.00624	0.0144408	0.0644098	0.0451852	Apln/Fosl1/Il6/Ngfr/Tnf	5	0.0106383
BP	GO:0006309	apoptotic DNA fragmentation	3/470	21/18913	0.142857	5.74863	3.47569	0.0145401	0.0644098	0.0451852	Cidea/Dnase1l3/Il6	3	0.00638298
BP	GO:0010633	negative regulation of epithelial cell migration	3/470	21/18913	0.142857	5.74863	3.47569	0.0145401	0.0644098	0.0451852	Mir222/Ptprr/Tgfbr3	3	0.00638298
BP	GO:0015810	aspartate transmembrane transport	3/470	21/18913	0.142857	5.74863	3.47569	0.0145401	0.0644098	0.0451852	Slc1a1/Slc1a2/Slc1a6	3	0.00638298
BP	GO:0032495	response to muramyl dipeptide	3/470	21/18913	0.142857	5.74863	3.47569	0.0145401	0.0644098	0.0451852	Nfkbia/Nod2/Tnfaip3	3	0.00638298
BP	GO:0043173	nucleotide salvage	3/470	21/18913	0.142857	5.74863	3.47569	0.0145401	0.0644098	0.0451852	Adss1/Cda/Upp1	3	0.00638298
BP	GO:0046068	cGMP metabolic process	3/470	21/18913	0.142857	5.74863	3.47569	0.0145401	0.0644098	0.0451852	Gucy1a1/Gucy1b1/Gucy2c	3	0.00638298
BP	GO:0046184	aldehyde biosynthetic process	3/470	21/18913	0.142857	5.74863	3.47569	0.0145401	0.0644098	0.0451852	Cacna1h/Kdm3a/Wnt4	3	0.00638298
BP	GO:0046851	negative regulation of bone remodeling	3/470	21/18913	0.142857	5.74863	3.47569	0.0145401	0.0644098	0.0451852	Cyp19a1/Il6/Vegfa	3	0.00638298
BP	GO:0061615	glycolytic process through fructose-6-phosphate	3/470	21/18913	0.142857	5.74863	3.47569	0.0145401	0.0644098	0.0451852	Eno2/Pfkp/Pgk1	3	0.00638298
BP	GO:0071636	positive regulation of transforming growth factor beta production	3/470	21/18913	0.142857	5.74863	3.47569	0.0145401	0.0644098	0.0451852	Cx3cl1/Ptgs2/Thbs1	3	0.00638298
BP	GO:1901550	regulation of endothelial cell development	3/470	21/18913	0.142857	5.74863	3.47569	0.0145401	0.0644098	0.0451852	Il1b/Tnf/Vegfa	3	0.00638298
BP	GO:1903140	regulation of establishment of endothelial barrier	3/470	21/18913	0.142857	5.74863	3.47569	0.0145401	0.0644098	0.0451852	Il1b/Tnf/Vegfa	3	0.00638298
BP	GO:0017156	calcium-ion regulated exocytosis	6/470	80/18913	0.075	3.01803	2.88745	0.0146015	0.06462	0.0453327	Cacna1h/Cacna1i/Doc2a/Sptbn2/Syt15/Syt17	6	0.012766
BP	GO:0034219	carbohydrate transmembrane transport	9/470	154/18913	0.0584416	2.35171	2.6887	0.0149654	0.0661674	0.0464182	C3/Ffar4/Hk2/Il1b/Slc1a2/Slc2a1/Slc2a3/Slc2a5/Tnf	9	0.0191489
BP	GO:0070252	actin-mediated cell contraction	7/470	104/18913	0.0673077	2.70849	2.789	0.0150836	0.0666266	0.0467404	Abcc9/Acta2/Cacna1h/Ccdc88c/Dsc2/Myh2/Stc1	7	0.0148936
BP	GO:0050866	negative regulation of cell activation	12/470	236/18913	0.0508475	2.04612	2.58159	0.015332	0.067595	0.0474197	Adora2a/Cd69/Dtx1/Id2/Pglyrp1/Pglyrp2/Pla2g5/RT1-Bb/Tnfaip3/Tnfrsf14/Vsir/Zc3h12a	12	0.0255319
BP	GO:0071331	cellular response to hexose stimulus	12/470	236/18913	0.0508475	2.04612	2.58159	0.015332	0.067595	0.0474197	Ano1/Ccl2/Crhr2/Cyp19a1/Gpr68/Il1b/Mir146a/Mir221/Mir222/Pde1c/Ppargc1a/Slc2a5	12	0.0255319
BP	GO:0046637	regulation of alpha-beta T cell differentiation	6/470	81/18913	0.0740741	2.98077	2.85188	0.0154496	0.0679888	0.047696	Cd69/Il6/Nfkbiz/Syk/Zap70/Zc3h12a	6	0.012766
BP	GO:0006518	peptide metabolic process	5/470	59/18913	0.0847458	3.41021	2.95992	0.0154653	0.0679888	0.047696	Anpep/Enpep/Nod2/Slc1a1/Slc1a2	5	0.0106383
BP	GO:0061082	myeloid leukocyte cytokine production	5/470	59/18913	0.0847458	3.41021	2.95992	0.0154653	0.0679888	0.047696	Acp5/Hmox1/Nod2/Syk/Tlr2	5	0.0106383
BP	GO:0048144	fibroblast proliferation	9/470	155/18913	0.0580645	2.33654	2.66721	0.0155519	0.0682617	0.0478875	Abcc9/C1ql4/Fth1/Gng2/Kcnn4/Mmp9/Ngfr/Ptprz1/Rasgrf1	9	0.0191489
BP	GO:0046697	decidualization	4/470	39/18913	0.102564	4.12722	3.12077	0.0155863	0.0682617	0.0478875	Epor/Ptgs2/Stc1/Stc2	4	0.00851064
BP	GO:0060008	Sertoli cell differentiation	4/470	39/18913	0.102564	4.12722	3.12077	0.0155863	0.0682617	0.0478875	Il1a/Map7/Ntrk1/Wnt4	4	0.00851064
BP	GO:0090183	regulation of kidney development	4/470	39/18913	0.102564	4.12722	3.12077	0.0155863	0.0682617	0.0478875	Osr1/Ret/Vegfa/Wnt4	4	0.00851064
BP	GO:0048872	homeostasis of number of cells	18/470	413/18913	0.0435835	1.75382	2.47263	0.0156306	0.0683559	0.0479536	Coro1a/Cxcl6/Gpi/Hcar2/Hmox1/Id2/Ikzf1/Il6/Map7/Mir221/Mir222/Nfkbiz/Nod2/Pla2g2a/Septin4/Tgfbr3/Tnfaip3/Vegfa	18	0.0382979
BP	GO:0032412	regulation of monoatomic ion transmembrane transporter activity	13/470	265/18913	0.0490566	1.97406	2.54914	0.0156373	0.0683559	0.0479536	Abcc9/Ccl2/Chrna4/Dapk1/Fgf11/Hap1/Mmp9/Osr1/P2ry6/Ppargc1a/Rasgrf1/Rgs9/Stac2	13	0.0276596
BP	GO:0002312	B cell activation involved in immune response	7/470	105/18913	0.0666667	2.6827	2.76014	0.0158274	0.0690795	0.0484611	Batf/Bcl3/Cd28/Cd40/Il6/Irf8/Nfkbiz	7	0.0148936
BP	GO:0007613	memory	10/470	182/18913	0.0549451	2.21101	2.62063	0.0158326	0.0690795	0.0484611	Aph1b/Foxo6/Grin1/Il1b/Il1rn/Itga8/Lcn2/Mapt/Ptgs2/Slc1a1	10	0.0212766
BP	GO:0015850	organic hydroxy compound transport	15/470	324/18913	0.0462963	1.86298	2.5012	0.0160069	0.0697742	0.0489485	Adora2a/Chrna4/Crhr2/Cyp19a1/Fcgr2a/Htr6/Il6/Kcna2/Mir27b/Nfkbia/Slc16a3/Syk/Tgm2/Tnf/Tspo	15	0.0319149
BP	GO:1903169	regulation of calcium ion transmembrane transport	11/470	210/18913	0.052381	2.10783	2.57709	0.0162283	0.0706729	0.049579	Adcyap1r1/Bdkrb1/Coro1a/Cx3cl1/Cxcl10/Grin1/Hap1/Kcnn4/P2ry6/Rgs9/Stac2	11	0.0234043
BP	GO:0007585	respiratory gaseous exchange by respiratory system	6/470	82/18913	0.0731707	2.94442	2.81684	0.0163313	0.0709882	0.0498001	Ccdc88c/Chrna4/Grin1/Grpr/Jag2/Tcf15	6	0.012766
BP	GO:0045069	regulation of viral genome replication	6/470	82/18913	0.0731707	2.94442	2.81684	0.0163313	0.0709882	0.0498001	Ccl5/Gbp7/Oasl/Rsad2/Slpi/Tnf	6	0.012766
BP	GO:0060546	negative regulation of necroptotic process	3/470	22/18913	0.136364	5.48733	3.36182	0.0165312	0.0715481	0.0501929	Birc3/Mir101a/Mir221	3	0.00638298
BP	GO:0071280	cellular response to copper ion	3/470	22/18913	0.136364	5.48733	3.36182	0.0165312	0.0715481	0.0501929	Atp7b/Cyp1a1/Mt1	3	0.00638298
BP	GO:0072109	glomerular mesangium development	3/470	22/18913	0.136364	5.48733	3.36182	0.0165312	0.0715481	0.0501929	Acta1/Acta2/Actg2	3	0.00638298
BP	GO:0150104	transport across blood-brain barrier	3/470	22/18913	0.136364	5.48733	3.36182	0.0165312	0.0715481	0.0501929	Mfsd2a/Slc2a1/Slc2a3	3	0.00638298
BP	GO:2000378	negative regulation of reactive oxygen species metabolic process	5/470	60/18913	0.0833333	3.35337	2.91459	0.0165372	0.0715481	0.0501929	Acp5/Birc3/Bnip3/Hk2/Mmp3	5	0.0106383
BP	GO:0071326	cellular response to monosaccharide stimulus	12/470	239/18913	0.0502092	2.02044	2.53437	0.01677	0.0724877	0.0508521	Ano1/Ccl2/Crhr2/Cyp19a1/Gpr68/Il1b/Mir146a/Mir221/Mir222/Pde1c/Ppargc1a/Slc2a5	12	0.0255319
BP	GO:0010001	glial cell differentiation	15/470	326/18913	0.0460123	1.85155	2.47581	0.0168283	0.0726721	0.0509814	Adora2a/Ano1/Bnip3/C1s/Cxcr4/Dab1/Dhh/Dtx1/Id2/Il1b/Il34/Mt2A/Ndrg1/Ptprz1/Tlr2	15	0.0319149
BP	GO:0062013	positive regulation of small molecule metabolic process	10/470	184/18913	0.0543478	2.18698	2.58284	0.016963	0.0730848	0.051271	Adcyap1r1/Il1b/Npy1r/P2ry6/Ppargc1a/Ppp1r3b/Ppp1r3g/Ptgs2/Tnf/Wnt4	10	0.0212766
BP	GO:0032354	response to follicle-stimulating hormone	4/470	40/18913	0.1	4.02404	3.05632	0.0169869	0.0730848	0.051271	Cyp19a1/Id2/Ppargc1a/Tgfbr3	4	0.00851064
BP	GO:0090051	negative regulation of cell migration involved in sprouting angiogenesis	4/470	40/18913	0.1	4.02404	3.05632	0.0169869	0.0730848	0.051271	Card10/Mir146a/Mir221/Thbs1	4	0.00851064
BP	GO:2000191	regulation of fatty acid transport	4/470	40/18913	0.1	4.02404	3.05632	0.0169869	0.0730848	0.051271	Il1a/Il1b/Syk/Thbs1	4	0.00851064
BP	GO:0010632	regulation of epithelial cell migration	6/470	83/18913	0.0722892	2.90895	2.78234	0.017247	0.0740663	0.0519595	Epb41l4b/Mir221/Mir222/Mmp9/Ptprr/Tgfbr3	6	0.012766
BP	GO:0050766	positive regulation of phagocytosis	6/470	83/18913	0.0722892	2.90895	2.78234	0.017247	0.0740663	0.0519595	C3/Ccl2/Fcgr2a/Nod2/Pla2g5/Slc11a1	6	0.012766
BP	GO:0030100	regulation of endocytosis	16/470	357/18913	0.0448179	1.80349	2.44667	0.0173198	0.0743099	0.0521304	Apln/C3/Ccl2/Dcx/Fcgr2a/Hap1/Kcnc3/Mir27b/Nod2/Pla2g5/Slc11a1/Syk/Syt17/Tgm2/Tlr2/Vegfa	16	0.0340426
BP	GO:0051591	response to cAMP	9/470	158/18913	0.056962	2.29218	2.60372	0.0174125	0.0746388	0.0523612	Aldh3a1/Ass1/Atp7b/C1s/Fosl1/Pla2g5/Serpina3n/Stc1/Wnt10b	9	0.0191489
BP	GO:0009161	ribonucleoside monophosphate metabolic process	5/470	61/18913	0.0819672	3.2984	2.8702	0.0176573	0.0754789	0.0529505	Adss1/Ak4/Cda/Dlgap2/Upp1	5	0.0106383
BP	GO:0015804	neutral amino acid transport	5/470	61/18913	0.0819672	3.2984	2.8702	0.0176573	0.0754789	0.0529505	Rgs4/Slc1a1/Slc1a2/Slc1a6/Slc6a7	5	0.0106383
BP	GO:0140374	antiviral innate immune response	5/470	61/18913	0.0819672	3.2984	2.8702	0.0176573	0.0754789	0.0529505	Cxcl10/Oasl/Tnf/Trim7/Usp18	5	0.0106383
BP	GO:0098742	cell-cell adhesion via plasma-membrane adhesion molecules	12/470	241/18913	0.0497925	2.00367	2.50327	0.0177837	0.075949	0.0532803	Cdh18/Cdh6/Cldn1/Clstn3/Cx3cl1/Dab1/Dchs2/Dsc2/Il1rn/Mdga2/Mir221/Ret	12	0.0255319
BP	GO:0030073	insulin secretion	13/470	270/18913	0.0481481	1.9375	2.47684	0.0179659	0.0766565	0.0537766	Ano1/Ccl5/Crhr2/Gipr/Gnaz/Gpr68/Il1b/Il1rn/Il6/Nos2/Pde1c/Stxbp5l/Tnf	13	0.0276596
BP	GO:0051209	release of sequestered calcium ion into cytosol	8/470	133/18913	0.0601504	2.42048	2.6243	0.0181136	0.0772157	0.054169	Bdkrb1/Ccl3/Coro1a/Cx3cl1/Cxcl10/Ero1a/Hap1/P2ry6	8	0.0170213
BP	GO:0001764	neuron migration	11/470	214/18913	0.0514019	2.06843	2.50927	0.0184037	0.0783485	0.0549636	Cxcr4/Dab1/Dcx/Ddit4/Mapt/Mdga2/Ntn1/Ptprz1/Scrt1/Septin4/Vegfa	11	0.0234043
BP	GO:0007435	salivary gland morphogenesis	4/470	41/18913	0.097561	3.9259	2.99394	0.0184638	0.0783485	0.0549636	Esrp2/Il6/Tgm2/Tnf	4	0.00851064
BP	GO:0019884	antigen processing and presentation of exogenous antigen	4/470	41/18913	0.097561	3.9259	2.99394	0.0184638	0.0783485	0.0549636	Fcgr2a/RT1-Bb/RT1-CE16/RT1-DMb	4	0.00851064
BP	GO:0042398	cellular modified amino acid biosynthetic process	4/470	41/18913	0.097561	3.9259	2.99394	0.0184638	0.0783485	0.0549636	Ckmt1/Gch1/Slc1a1/Slc1a2	4	0.00851064
BP	GO:2000515	negative regulation of CD4-positive, alpha-beta T cell activation	4/470	41/18913	0.097561	3.9259	2.99394	0.0184638	0.0783485	0.0549636	Cd69/Tnfrsf14/Vsir/Zc3h12a	4	0.00851064
BP	GO:0010232	vascular transport	3/470	23/18913	0.130435	5.24875	3.2547	0.0186672	0.0788511	0.0553162	Mfsd2a/Slc2a1/Slc2a3	3	0.00638298
BP	GO:0045956	positive regulation of calcium ion-dependent exocytosis	3/470	23/18913	0.130435	5.24875	3.2547	0.0186672	0.0788511	0.0553162	Cacna1h/Cacna1i/Doc2a	3	0.00638298
BP	GO:0048143	astrocyte activation	3/470	23/18913	0.130435	5.24875	3.2547	0.0186672	0.0788511	0.0553162	Adora2a/Il1b/Mt2A	3	0.00638298
BP	GO:0090200	positive regulation of release of cytochrome c from mitochondria	3/470	23/18913	0.130435	5.24875	3.2547	0.0186672	0.0788511	0.0553162	Bik/Bnip3/Mmp9	3	0.00638298
BP	GO:1902644	tertiary alcohol metabolic process	3/470	23/18913	0.130435	5.24875	3.2547	0.0186672	0.0788511	0.0553162	Akr1b10/Cacna1h/Wnt4	3	0.00638298
BP	GO:0001837	epithelial to mesenchymal transition	10/470	187/18913	0.0534759	2.15189	2.52704	0.018769	0.079209	0.0555673	Hey1/Heyl/Il1b/Il6/Mir221/Mir222/Notch4/Tgfbr3/Vegfa/Wnt4	10	0.0212766
BP	GO:0035272	exocrine system development	5/470	62/18913	0.0806452	3.2452	2.82673	0.0188265	0.0793071	0.0556361	Esrp2/Il6/Rab26/Tgm2/Tnf	5	0.0106383
BP	GO:0061756	leukocyte adhesion to vascular endothelial cell	5/470	62/18913	0.0806452	3.2452	2.82673	0.0188265	0.0793071	0.0556361	Il6/Mir146a/Mir221/Mir222/Tnf	5	0.0106383
BP	GO:0032409	regulation of transporter activity	14/470	301/18913	0.0465116	1.87165	2.43349	0.0188557	0.0793095	0.0556378	Abcc9/Ccl2/Chrna4/Dapk1/Fgf11/Hap1/Mmp9/Osr1/P2ry6/Ppargc1a/Rasgrf1/Rgs9/Stac2/Syngr3	14	0.0297872
BP	GO:0051283	negative regulation of sequestering of calcium ion	8/470	134/18913	0.0597015	2.40241	2.60072	0.0188612	0.0793095	0.0556378	Bdkrb1/Ccl3/Coro1a/Cx3cl1/Cxcl10/Ero1a/Hap1/P2ry6	8	0.0170213
BP	GO:0001912	positive regulation of leukocyte mediated cytotoxicity	6/470	85/18913	0.0705882	2.8405	2.71485	0.0191831	0.0804443	0.0564339	Ccl2/Cxcl1/Il12b/RT1-CE1/RT1-CE16/RT1-S3	6	0.012766
BP	GO:0003151	outflow tract morphogenesis	6/470	85/18913	0.0705882	2.8405	2.71485	0.0191831	0.0804443	0.0564339	Hey1/Heyl/Npy1r/Tgfbr3/Thbs1/Vegfa	6	0.012766
BP	GO:1903036	positive regulation of response to wounding	6/470	85/18913	0.0705882	2.8405	2.71485	0.0191831	0.0804443	0.0564339	Ccl2/Cldn1/Cxcr4/Hpse/Mir221/Thbs1	6	0.012766
BP	GO:0032872	regulation of stress-activated MAPK cascade	4/470	42/18913	0.0952381	3.83242	2.93351	0.0200178	0.0836972	0.0587159	Crhr2/Il1a/Il1b/Nod2	4	0.00851064
BP	GO:0098868	bone growth	4/470	42/18913	0.0952381	3.83242	2.93351	0.0200178	0.0836972	0.0587159	Matn1/Mmp13/Stc1/Thbs1	4	0.00851064
BP	GO:2000463	positive regulation of excitatory postsynaptic potential	4/470	42/18913	0.0952381	3.83242	2.93351	0.0200178	0.0836972	0.0587159	Grin1/Grin2c/Ngfr/Rgs4	4	0.00851064
BP	GO:0034113	heterotypic cell-cell adhesion	5/470	63/18913	0.0793651	3.19368	2.78414	0.0200454	0.0836972	0.0587159	Dsc2/Il1b/Il1rn/Mir221/Tnf	5	0.0106383
BP	GO:0007219	Notch signaling pathway	10/470	189/18913	0.0529101	2.12912	2.49043	0.0200491	0.0836972	0.0587159	Aph1b/Cdh6/Dtx1/Hey1/Heyl/Jag2/Mesp2/Nfkbia/Nod2/Notch4	10	0.0212766
BP	GO:0032526	response to retinoic acid	9/470	162/18913	0.0555556	2.23558	2.52126	0.0201394	0.0839988	0.0589274	Adh1c/Ccl2/Map7/Mmp9/Osr1/Rbp1/Ret/Tnf/Wnt4	9	0.0191489
BP	GO:0051282	regulation of sequestering of calcium ion	8/470	136/18913	0.0588235	2.36708	2.55419	0.0204223	0.085102	0.0597014	Bdkrb1/Ccl3/Coro1a/Cx3cl1/Cxcl10/Ero1a/Hap1/P2ry6	8	0.0170213
BP	GO:0022898	regulation of transmembrane transporter activity	13/470	275/18913	0.0472727	1.90227	2.40606	0.0205476	0.0855473	0.0600138	Abcc9/Ccl2/Chrna4/Dapk1/Fgf11/Hap1/Mmp9/Osr1/P2ry6/Ppargc1a/Rasgrf1/Rgs9/Stac2	13	0.0276596
BP	GO:0031334	positive regulation of protein-containing complex assembly	11/470	218/18913	0.0504587	2.03048	2.44291	0.0207888	0.0861353	0.0604263	Bik/Csf2/Csf3/Ikzf1/Lmod1/Mapt/Mmp3/Syk/Tnf/Vegfa/Wnt10b	11	0.0234043
BP	GO:0002218	activation of innate immune response	14/470	305/18913	0.0459016	1.8471	2.38088	0.0208548	0.0861353	0.0604263	Fosl1/Gbp7/Mir146a/Nfkbia/Nfkbiz/Nod2/Oasl/Rsad2/Syk/Ticam2/Tlr2/Tnf/Tnfaip3/Tnip3	14	0.0297872
BP	GO:0002295	T-helper cell lineage commitment	3/470	24/18913	0.125	5.03005	3.15365	0.0209488	0.0861353	0.0604263	Batf/Cd69/Il6	3	0.00638298
BP	GO:0009629	response to gravity	3/470	24/18913	0.125	5.03005	3.15365	0.0209488	0.0861353	0.0604263	Fabp4/Fosl1/Otop1	3	0.00638298
BP	GO:0010888	negative regulation of lipid storage	3/470	24/18913	0.125	5.03005	3.15365	0.0209488	0.0861353	0.0604263	Clstn3/Mir146a/Nfkbia	3	0.00638298
BP	GO:0033194	response to hydroperoxide	3/470	24/18913	0.125	5.03005	3.15365	0.0209488	0.0861353	0.0604263	Ccl5/Dapk1/Nefh	3	0.00638298
BP	GO:0035313	wound healing, spreading of epidermal cells	3/470	24/18913	0.125	5.03005	3.15365	0.0209488	0.0861353	0.0604263	Mir221/Mmp12/Plet1	3	0.00638298
BP	GO:0035872	nucleotide-binding domain, leucine rich repeat containing receptor signaling pathway	3/470	24/18913	0.125	5.03005	3.15365	0.0209488	0.0861353	0.0604263	Nfkbia/Nod2/Tnfaip3	3	0.00638298
BP	GO:0043116	negative regulation of vascular permeability	3/470	24/18913	0.125	5.03005	3.15365	0.0209488	0.0861353	0.0604263	Adm/Adora2a/Vegfa	3	0.00638298
BP	GO:0046579	positive regulation of Ras protein signal transduction	3/470	24/18913	0.125	5.03005	3.15365	0.0209488	0.0861353	0.0604263	Ntrk1/Rasgef1a/Rasgrf1	3	0.00638298
BP	GO:0046835	carbohydrate phosphorylation	3/470	24/18913	0.125	5.03005	3.15365	0.0209488	0.0861353	0.0604263	Hk2/Hk3/Khk	3	0.00638298
BP	GO:0050872	white fat cell differentiation	3/470	24/18913	0.125	5.03005	3.15365	0.0209488	0.0861353	0.0604263	Fabp4/Ffar4/Id2	3	0.00638298
BP	GO:0051930	regulation of sensory perception of pain	3/470	24/18913	0.125	5.03005	3.15365	0.0209488	0.0861353	0.0604263	Ccl3/Grm1/Nmu	3	0.00638298
BP	GO:0062099	negative regulation of programmed necrotic cell death	3/470	24/18913	0.125	5.03005	3.15365	0.0209488	0.0861353	0.0604263	Birc3/Mir101a/Mir221	3	0.00638298
BP	GO:0022604	regulation of cell morphogenesis	13/470	276/18913	0.0471014	1.89538	2.39209	0.0210957	0.0866622	0.0607959	Ccl2/Ccl3/Ccl7/Coro1a/Cpne5/Cxcr4/Gas7/Il6/Mfsd2a/Mir222/Palmd/Syt17/Vegfa	13	0.0276596
BP	GO:0008360	regulation of cell shape	8/470	137/18913	0.0583942	2.34981	2.53123	0.0212363	0.0868704	0.060942	Ccl2/Ccl3/Ccl7/Coro1a/Gas7/Il6/Palmd/Vegfa	8	0.0170213
BP	GO:0030316	osteoclast differentiation	8/470	137/18913	0.0583942	2.34981	2.53123	0.0212363	0.0868704	0.060942	Acp5/Ccl2/Ccl3/Ccl5/Cxcr4/Gpr68/Il12b/Tnf	8	0.0170213
BP	GO:0050852	T cell receptor signaling pathway	8/470	137/18913	0.0583942	2.34981	2.53123	0.0212363	0.0868704	0.060942	Cd28/Fcho1/Kcnn4/Nfkbiz/RT1-Bb/RT1-CE16/Zap70/Zc3h12a	8	0.0170213
BP	GO:0061041	regulation of wound healing	8/470	137/18913	0.0583942	2.34981	2.53123	0.0212363	0.0868704	0.060942	Ccl2/Cldn1/Cxcr4/Hpse/Mir221/Thbs1/Tnf/Wnt4	8	0.0170213
BP	GO:0040014	regulation of multicellular organism growth	6/470	87/18913	0.0689655	2.7752	2.64929	0.0212624	0.0868704	0.060942	Adrb3/Gdf5/Ikzf1/Mfsd2a/Npy1r/Stc2	6	0.012766
BP	GO:0051937	catecholamine transport	6/470	87/18913	0.0689655	2.7752	2.64929	0.0212624	0.0868704	0.060942	Adora2a/Chrna4/Crhr2/Htr6/Kcna2/Tgm2	6	0.012766
BP	GO:0002381	immunoglobulin production involved in immunoglobulin-mediated immune response	5/470	64/18913	0.078125	3.14378	2.74239	0.0213149	0.0868704	0.060942	Batf/Cd28/Cd40/Nfkbiz/RT1-Bb	5	0.0106383
BP	GO:0019228	neuronal action potential	5/470	64/18913	0.078125	3.14378	2.74239	0.0213149	0.0868704	0.060942	Cacna1h/Cacna1i/Chrna4/Kcna2/Kcnma1	5	0.0106383
BP	GO:0098815	modulation of excitatory postsynaptic potential	5/470	64/18913	0.078125	3.14378	2.74239	0.0213149	0.0868704	0.060942	Chrna4/Grin1/Grin2c/Ngfr/Rgs4	5	0.0106383
BP	GO:0002335	mature B cell differentiation	4/470	43/18913	0.0930233	3.7433	2.8749	0.0216501	0.0876972	0.061522	Bcl3/Il6/Irf8/Nfkbiz	4	0.00851064
BP	GO:0043277	apoptotic cell clearance	4/470	43/18913	0.0930233	3.7433	2.8749	0.0216501	0.0876972	0.061522	C3/Ccl2/Tgm2/Thbs1	4	0.00851064
BP	GO:0044331	cell-cell adhesion mediated by cadherin	4/470	43/18913	0.0930233	3.7433	2.8749	0.0216501	0.0876972	0.061522	Cdh18/Cdh6/Notch4/Vegfa	4	0.00851064
BP	GO:0051647	nucleus localization	4/470	43/18913	0.0930233	3.7433	2.8749	0.0216501	0.0876972	0.061522	Efcc1/Kif1a/Ntn1/Slit1	4	0.00851064
BP	GO:0060351	cartilage development involved in endochondral bone morphogenesis	4/470	43/18913	0.0930233	3.7433	2.8749	0.0216501	0.0876972	0.061522	Matn1/Mmp13/Stc1/Thbs1	4	0.00851064
BP	GO:0071425	hematopoietic stem cell proliferation	4/470	43/18913	0.0930233	3.7433	2.8749	0.0216501	0.0876972	0.061522	Cxcl1/Mir221/Mir222/Wnt10b	4	0.00851064
BP	GO:0090075	relaxation of muscle	4/470	43/18913	0.0930233	3.7433	2.8749	0.0216501	0.0876972	0.061522	Bdkrb1/Gucy1a1/Irag1/Kcnma1	4	0.00851064
BP	GO:0048608	reproductive structure development	18/470	429/18913	0.041958	1.68841	2.30239	0.021978	0.0889478	0.0623993	Bik/C3/Cdh6/Cyp19a1/Dhh/Fst/Il1a/Jag2/Kdm3a/Map7/Mmp13/Nefh/Notch4/Ntrk1/Osr1/Utf1/Vegfa/Wnt4	18	0.0382979
BP	GO:0033627	cell adhesion mediated by integrin	6/470	88/18913	0.0681818	2.74367	2.61721	0.0223571	0.0904029	0.0634201	Ccl5/Itga10/Itga8/Podxl/Ret/Syk	6	0.012766
BP	GO:0060562	epithelial tube morphogenesis	17/470	399/18913	0.0426065	1.7145	2.30273	0.0224288	0.090614	0.0635682	Adm/Cxcl10/Cxcr4/Esrp2/Hey1/Lcn2/Mgp/Mtss1/Notch4/Ntn1/Osr1/Podxl/Ret/Sostdc1/Tnf/Vegfa/Wnt4	17	0.0361702
BP	GO:0010631	epithelial cell migration	7/470	113/18913	0.0619469	2.49277	2.54071	0.0227361	0.0916957	0.064327	Coro1a/Epb41l4b/Mir221/Mir222/Mmp9/Ptprr/Tgfbr3	7	0.0148936
BP	GO:0051899	membrane depolarization	7/470	113/18913	0.0619469	2.49277	2.54071	0.0227361	0.0916957	0.064327	Adora2a/Cacna1h/Cacna1i/Chrna4/Grm1/Ngfr/Tspo	7	0.0148936
BP	GO:0002758	innate immune response-activating signaling pathway	13/470	279/18913	0.046595	1.875	2.3505	0.0228055	0.0918958	0.0644674	Fosl1/Mir146a/Nfkbia/Nfkbiz/Nod2/Oasl/Rsad2/Syk/Ticam2/Tlr2/Tnf/Tnfaip3/Tnip3	13	0.0276596
BP	GO:0034599	cellular response to oxidative stress	14/470	309/18913	0.0453074	1.82319	2.32905	0.0230096	0.0926377	0.0649879	Bnip3/Ccl5/Dapk1/Gch1/Hk3/Il6/Lcn2/Mmp3/Nefh/Ngfr/Ppargc1a/Slc1a1/Tnfaip3/Zc3h12a	14	0.0297872
BP	GO:0002446	neutrophil mediated immunity	4/470	44/18913	0.0909091	3.65822	2.81802	0.0233615	0.0928248	0.0651192	Cxcl1/Cxcl6/Dnase1l3/Syk	4	0.00851064
BP	GO:0038179	neurotrophin signaling pathway	4/470	44/18913	0.0909091	3.65822	2.81802	0.0233615	0.0928248	0.0651192	Coro1a/Ddit4/Hap1/Ntrk1	4	0.00851064
BP	GO:0070302	regulation of stress-activated protein kinase signaling cascade	4/470	44/18913	0.0909091	3.65822	2.81802	0.0233615	0.0928248	0.0651192	Crhr2/Il1a/Il1b/Nod2	4	0.00851064
BP	GO:0070873	regulation of glycogen metabolic process	4/470	44/18913	0.0909091	3.65822	2.81802	0.0233615	0.0928248	0.0651192	Khk/Ppp1r3b/Ppp1r3c/Ppp1r3g	4	0.00851064
BP	GO:0006700	C21-steroid hormone biosynthetic process	3/470	25/18913	0.12	4.82885	3.05807	0.0233763	0.0928248	0.0651192	Cacna1h/Ppargc1a/Wnt4	3	0.00638298
BP	GO:0007530	sex determination	3/470	25/18913	0.12	4.82885	3.05807	0.0233763	0.0928248	0.0651192	Dhh/Insrr/Wnt4	3	0.00638298
BP	GO:0008090	retrograde axonal transport	3/470	25/18913	0.12	4.82885	3.05807	0.0233763	0.0928248	0.0651192	Hap1/Kif1a/Mgarp	3	0.00638298
BP	GO:0010743	regulation of macrophage derived foam cell differentiation	3/470	25/18913	0.12	4.82885	3.05807	0.0233763	0.0928248	0.0651192	Csf2/Nfkbia/Pla2g5	3	0.00638298
BP	GO:0043043	peptide biosynthetic process	3/470	25/18913	0.12	4.82885	3.05807	0.0233763	0.0928248	0.0651192	Nod2/Slc1a1/Slc1a2	3	0.00638298
BP	GO:0043153	entrainment of circadian clock by photoperiod	3/470	25/18913	0.12	4.82885	3.05807	0.0233763	0.0928248	0.0651192	Bhlhe40/Fbxl21/Id2	3	0.00638298
BP	GO:0051931	regulation of sensory perception	3/470	25/18913	0.12	4.82885	3.05807	0.0233763	0.0928248	0.0651192	Ccl3/Grm1/Nmu	3	0.00638298
BP	GO:0070528	protein kinase C signaling	3/470	25/18913	0.12	4.82885	3.05807	0.0233763	0.0928248	0.0651192	Adgrv1/Ankrd1/Cd40	3	0.00638298
BP	GO:0071285	cellular response to lithium ion	3/470	25/18913	0.12	4.82885	3.05807	0.0233763	0.0928248	0.0651192	Fabp4/Id2/Nos2	3	0.00638298
BP	GO:0097049	motor neuron apoptotic process	3/470	25/18913	0.12	4.82885	3.05807	0.0233763	0.0928248	0.0651192	Cntfr/Crlf1/Slc1a1	3	0.00638298
BP	GO:0099550	trans-synaptic signaling, modulating synaptic transmission	3/470	25/18913	0.12	4.82885	3.05807	0.0233763	0.0928248	0.0651192	Faah/Gucy1a1/Gucy1b1	3	0.00638298
BP	GO:2001026	regulation of endothelial cell chemotaxis	3/470	25/18913	0.12	4.82885	3.05807	0.0233763	0.0928248	0.0651192	Fgf16/Thbs1/Vegfa	3	0.00638298
BP	GO:0003281	ventricular septum development	6/470	89/18913	0.0674157	2.71284	2.58557	0.0234891	0.0931044	0.0653153	Cxcr4/Egln1/Hey1/Heyl/Id2/Tgfbr3	6	0.012766
BP	GO:0051279	regulation of release of sequestered calcium ion into cytosol	6/470	89/18913	0.0674157	2.71284	2.58557	0.0234891	0.0931044	0.0653153	Bdkrb1/Coro1a/Cx3cl1/Cxcl10/Hap1/P2ry6	6	0.012766
BP	GO:0006575	cellular modified amino acid metabolic process	10/470	194/18913	0.0515464	2.07425	2.40086	0.023527	0.0931044	0.0653153	Ass1/Ckmt1/Ero1a/Gch1/Gsta1/Mfsd2a/P4ha2/Serinc2/Slc1a1/Slc1a2	10	0.0212766
BP	GO:0045807	positive regulation of endocytosis	10/470	194/18913	0.0515464	2.07425	2.40086	0.023527	0.0931044	0.0653153	Apln/C3/Ccl2/Dcx/Fcgr2a/Nod2/Pla2g5/Slc11a1/Syk/Vegfa	10	0.0212766
BP	GO:0051347	positive regulation of transferase activity	16/470	371/18913	0.0431267	1.73544	2.28379	0.0237973	0.0938377	0.0658297	Arrdc4/Card10/Chi3l1/Dab1/Higd1a/Il1b/Il1rn/Il34/Ppp1r3g/Serinc2/Slc11a1/Slc1a1/Syk/Thbs1/Tnf/Tnfsf15	16	0.0340426
BP	GO:0010508	positive regulation of autophagy	9/470	167/18913	0.0538922	2.16865	2.42152	0.0239658	0.0938377	0.0658297	Bnip3/Dapk1/Hk2/Hmox1/Mir222/Nod2/Rnf152/Tlr2/Zc3h12a	9	0.0191489
BP	GO:0000271	polysaccharide biosynthetic process	5/470	66/18913	0.0757576	3.04852	2.66129	0.0240082	0.0938377	0.0658297	Gbe1/Ndst3/Ppp1r3b/Ppp1r3c/Ppp1r3g	5	0.0106383
BP	GO:0045599	negative regulation of fat cell differentiation	5/470	66/18913	0.0757576	3.04852	2.66129	0.0240082	0.0938377	0.0658297	C1ql4/Mir27b/Tnf/Vegfa/Wnt10b	5	0.0106383
BP	GO:0060760	positive regulation of response to cytokine stimulus	5/470	66/18913	0.0757576	3.04852	2.66129	0.0240082	0.0938377	0.0658297	Cd40/Cxcr4/Mmp12/Ticam2/Tlr2	5	0.0106383
BP	GO:0002885	positive regulation of hypersensitivity	2/470	10/18913	0.2	8.04809	3.55883	0.0243001	0.0938377	0.0658297	C3/Fcgr2a	2	0.00425532
BP	GO:0006068	ethanol catabolic process	2/470	10/18913	0.2	8.04809	3.55883	0.0243001	0.0938377	0.0658297	Adh1c/Adh7	2	0.00425532
BP	GO:0006222	UMP biosynthetic process	2/470	10/18913	0.2	8.04809	3.55883	0.0243001	0.0938377	0.0658297	Cda/Upp1	2	0.00425532
BP	GO:0009624	response to nematode	2/470	10/18913	0.2	8.04809	3.55883	0.0243001	0.0938377	0.0658297	Cyp1a1/Ptgs2	2	0.00425532
BP	GO:0010041	response to iron(III) ion	2/470	10/18913	0.2	8.04809	3.55883	0.0243001	0.0938377	0.0658297	Cyp1a1/Mmp9	2	0.00425532
BP	GO:0018879	biphenyl metabolic process	2/470	10/18913	0.2	8.04809	3.55883	0.0243001	0.0938377	0.0658297	Cyp19a1/Cyp4b1	2	0.00425532
BP	GO:0030388	fructose 1,6-bisphosphate metabolic process	2/470	10/18913	0.2	8.04809	3.55883	0.0243001	0.0938377	0.0658297	Aldoc/Pfkp	2	0.00425532
BP	GO:0031394	positive regulation of prostaglandin biosynthetic process	2/470	10/18913	0.2	8.04809	3.55883	0.0243001	0.0938377	0.0658297	Il1b/Ptgs2	2	0.00425532
BP	GO:0035740	CD8-positive, alpha-beta T cell proliferation	2/470	10/18913	0.2	8.04809	3.55883	0.0243001	0.0938377	0.0658297	RT1-CE16/Vsir	2	0.00425532
BP	GO:0035907	dorsal aorta development	2/470	10/18913	0.2	8.04809	3.55883	0.0243001	0.0938377	0.0658297	Hey1/Ngfr	2	0.00425532
BP	GO:0042590	antigen processing and presentation of exogenous peptide antigen via MHC class I	2/470	10/18913	0.2	8.04809	3.55883	0.0243001	0.0938377	0.0658297	Fcgr2a/RT1-CE16	2	0.00425532
BP	GO:0043615	astrocyte cell migration	2/470	10/18913	0.2	8.04809	3.55883	0.0243001	0.0938377	0.0658297	Ccl2/Ccl3	2	0.00425532
BP	GO:0045794	negative regulation of cell volume	2/470	10/18913	0.2	8.04809	3.55883	0.0243001	0.0938377	0.0658297	Kcnma1/Kcnn4	2	0.00425532
BP	GO:0046880	regulation of follicle-stimulating hormone secretion	2/470	10/18913	0.2	8.04809	3.55883	0.0243001	0.0938377	0.0658297	Crhr2/Fst	2	0.00425532
BP	GO:0060359	response to ammonium ion	2/470	10/18913	0.2	8.04809	3.55883	0.0243001	0.0938377	0.0658297	Ass1/Slc1a1	2	0.00425532
BP	GO:0070091	glucagon secretion	2/470	10/18913	0.2	8.04809	3.55883	0.0243001	0.0938377	0.0658297	Ffar4/Il6	2	0.00425532
BP	GO:0070092	regulation of glucagon secretion	2/470	10/18913	0.2	8.04809	3.55883	0.0243001	0.0938377	0.0658297	Ffar4/Il6	2	0.00425532
BP	GO:0070100	negative regulation of chemokine-mediated signaling pathway	2/470	10/18913	0.2	8.04809	3.55883	0.0243001	0.0938377	0.0658297	Ccl5/Mir101a	2	0.00425532
BP	GO:0110088	hippocampal neuron apoptotic process	2/470	10/18913	0.2	8.04809	3.55883	0.0243001	0.0938377	0.0658297	Cx3cl1/Lcn2	2	0.00425532
BP	GO:1902035	positive regulation of hematopoietic stem cell proliferation	2/470	10/18913	0.2	8.04809	3.55883	0.0243001	0.0938377	0.0658297	Cxcl1/Wnt10b	2	0.00425532
BP	GO:1904415	regulation of xenophagy	2/470	10/18913	0.2	8.04809	3.55883	0.0243001	0.0938377	0.0658297	Nod2/Tlr2	2	0.00425532
BP	GO:1904417	positive regulation of xenophagy	2/470	10/18913	0.2	8.04809	3.55883	0.0243001	0.0938377	0.0658297	Nod2/Tlr2	2	0.00425532
BP	GO:2000564	regulation of CD8-positive, alpha-beta T cell proliferation	2/470	10/18913	0.2	8.04809	3.55883	0.0243001	0.0938377	0.0658297	RT1-CE16/Vsir	2	0.00425532
BP	GO:2000659	regulation of interleukin-1-mediated signaling pathway	2/470	10/18913	0.2	8.04809	3.55883	0.0243001	0.0938377	0.0658297	Il1rn/Il6	2	0.00425532
BP	GO:0061458	reproductive system development	18/470	434/18913	0.0414747	1.66896	2.25064	0.0243193	0.0938377	0.0658297	Bik/C3/Cdh6/Cyp19a1/Dhh/Fst/Il1a/Jag2/Kdm3a/Map7/Mmp13/Nefh/Notch4/Ntrk1/Osr1/Utf1/Vegfa/Wnt4	18	0.0382979
BP	GO:0007626	locomotory behavior	13/470	282/18913	0.0460993	1.85506	2.30942	0.0246164	0.0948264	0.0665233	Adora2a/Aph1b/Chrna4/Dab1/Grin1/Grm1/Id2/Kcnma1/Mapt/Mcoln3/Npy1r/Rasd2/Slc1a1	13	0.0276596
BP	GO:0090257	regulation of muscle system process	13/470	282/18913	0.0460993	1.85506	2.30942	0.0246164	0.0948264	0.0665233	Bdkrb1/Cacna1h/Dsc2/Gucy1a1/Irag1/Kcnma1/Kcnn4/Nmu/Ppargc1a/Ptgs2/Rgs4/Stc1/Zc3h12a	13	0.0276596
BP	GO:0005976	polysaccharide metabolic process	7/470	115/18913	0.0608696	2.44942	2.48879	0.0247443	0.095161	0.0667581	Gbe1/Khk/Ndst3/Ppp1r3b/Ppp1r3c/Ppp1r3g/Pygl	7	0.0148936
BP	GO:0090132	epithelium migration	7/470	115/18913	0.0608696	2.44942	2.48879	0.0247443	0.095161	0.0667581	Coro1a/Epb41l4b/Mir221/Mir222/Mmp9/Ptprr/Tgfbr3	7	0.0148936
BP	GO:0042552	myelination	10/470	196/18913	0.0510204	2.05308	2.36578	0.0250335	0.0961735	0.0674684	Cxcr4/Dhh/Mal2/Mir23b/Mir27b/Ndrg1/Ngfr/Ptprz1/Tlr2/Tnf	10	0.0212766
BP	GO:0033189	response to vitamin A	4/470	45/18913	0.0888889	3.57693	2.76279	0.0251528	0.0961735	0.0674684	Cyp1a1/Mmp9/Rbp1/Vegfa	4	0.00851064
BP	GO:0042554	superoxide anion generation	4/470	45/18913	0.0888889	3.57693	2.76279	0.0251528	0.0961735	0.0674684	Acp5/Cxcl1/Mapt/Syk	4	0.00851064
BP	GO:0050691	regulation of defense response to virus by host	4/470	45/18913	0.0888889	3.57693	2.76279	0.0251528	0.0961735	0.0674684	Il12b/Il1b/Mmp12/Zc3h12a	4	0.00851064
BP	GO:0071361	cellular response to ethanol	4/470	45/18913	0.0888889	3.57693	2.76279	0.0251528	0.0961735	0.0674684	Ccl5/Ccl7/Kcnmb1/Sptbn2	4	0.00851064
BP	GO:0090199	regulation of release of cytochrome c from mitochondria	4/470	45/18913	0.0888889	3.57693	2.76279	0.0251528	0.0961735	0.0674684	Bik/Bnip3/Higd1a/Mmp9	4	0.00851064
BP	GO:0097484	dendrite extension	4/470	45/18913	0.0888889	3.57693	2.76279	0.0251528	0.0961735	0.0674684	Cpne5/Cxcr4/Mir222/Syt17	4	0.00851064
BP	GO:0031099	regeneration	15/470	343/18913	0.0437318	1.75979	2.26691	0.0251791	0.0961948	0.0674833	Adh1c/Adm/Aldoc/Ccl2/Cldn1/Cxcl6/Hmox1/Hopx/Il6/Nefh/Nfkbia/Tgfbr3/Tnf/Tspo/Wnt10b	15	0.0319149
BP	GO:0050878	regulation of body fluid levels	17/470	405/18913	0.0419753	1.6891	2.23787	0.0254269	0.0968471	0.0679409	Adm/Adora2a/Ano1/Apln/Atp7b/Hk2/Hpse/Il6/Kcnma1/Kcnn4/Mir222/Mmp13/Nbeal2/Pdia2/Syk/Thbs1/Vegfa	17	0.0361702
BP	GO:0030225	macrophage differentiation	5/470	67/18913	0.0746269	3.00302	2.62189	0.0254333	0.0968471	0.0679409	Csf2/Id2/Il34/Tlr2/Vegfa	5	0.0106383
BP	GO:1902930	regulation of alcohol biosynthetic process	5/470	67/18913	0.0746269	3.00302	2.62189	0.0254333	0.0968471	0.0679409	Adcyap1r1/Gpr146/Npy1r/P2ry6/Wnt4	5	0.0106383
BP	GO:2001238	positive regulation of extrinsic apoptotic signaling pathway	5/470	67/18913	0.0746269	3.00302	2.62189	0.0254333	0.0968471	0.0679409	G0s2/Ret/Thbs1/Tnf/Tnfsf15	5	0.0106383
BP	GO:0022612	gland morphogenesis	9/470	169/18913	0.0532544	2.14298	2.38261	0.0256325	0.0972956	0.0682555	Ccl2/Esrp2/Il6/Ntn1/Sostdc1/Tgm2/Tnf/Tnfaip3/Wnt4	9	0.0191489
BP	GO:0007631	feeding behavior	8/470	142/18913	0.056338	2.26707	2.41937	0.025653	0.0972956	0.0682555	Adora2a/Adrb3/Apln/Cntfr/Crhr2/Grin1/Nmu/Npy1r	8	0.0170213
BP	GO:0019079	viral genome replication	7/470	116/18913	0.0603448	2.4283	2.46324	0.0257927	0.0972956	0.0682555	Ccl5/Gbp7/Oasl/Rsad2/Slpi/Tnf/Zc3h12a	7	0.0148936
BP	GO:0008543	fibroblast growth factor receptor signaling pathway	6/470	91/18913	0.0659341	2.65321	2.52359	0.025867	0.0972956	0.0682555	Apln/Fgf16/Mir146a/Ngfr/Thbs1/Wnt4	6	0.012766
BP	GO:0043583	ear development	13/470	284/18913	0.0457746	1.84199	2.28231	0.0258814	0.0972956	0.0682555	Adgrv1/Cebpd/Cxcl14/Frzb/Hey1/Itga8/Jag2/Kcnma1/Mcoln3/Ntn1/Osr1/Otop1/Tcf15	13	0.0276596
BP	GO:0002486	antigen processing and presentation of endogenous peptide antigen via MHC class I via ER pathway, TAP-independent	3/470	26/18913	0.115385	4.64313	2.96744	0.0259497	0.0972956	0.0682555	RT1-CE1/RT1-CE16/RT1-S3	3	0.00638298
BP	GO:0002888	positive regulation of myeloid leukocyte mediated immunity	3/470	26/18913	0.115385	4.64313	2.96744	0.0259497	0.0972956	0.0682555	C3/Cxcl1/Fcgr2a	3	0.00638298
BP	GO:0009190	cyclic nucleotide biosynthetic process	3/470	26/18913	0.115385	4.64313	2.96744	0.0259497	0.0972956	0.0682555	Gucy1a1/Gucy1b1/Gucy2c	3	0.00638298
BP	GO:0018149	peptide cross-linking	3/470	26/18913	0.115385	4.64313	2.96744	0.0259497	0.0972956	0.0682555	Evpl/Tgm2/Thbs1	3	0.00638298
BP	GO:0032693	negative regulation of interleukin-10 production	3/470	26/18913	0.115385	4.64313	2.96744	0.0259497	0.0972956	0.0682555	Il12b/Thbs1/Vsir	3	0.00638298
BP	GO:0032740	positive regulation of interleukin-17 production	3/470	26/18913	0.115385	4.64313	2.96744	0.0259497	0.0972956	0.0682555	Il12b/Il6/Nod2	3	0.00638298
BP	GO:0034643	establishment of mitochondrion localization, microtubule-mediated	3/470	26/18913	0.115385	4.64313	2.96744	0.0259497	0.0972956	0.0682555	Hap1/Mapt/Mgarp	3	0.00638298
BP	GO:0035739	CD4-positive, alpha-beta T cell proliferation	3/470	26/18913	0.115385	4.64313	2.96744	0.0259497	0.0972956	0.0682555	Cd28/Tnfrsf14/Vsir	3	0.00638298
BP	GO:0043373	CD4-positive, alpha-beta T cell lineage commitment	3/470	26/18913	0.115385	4.64313	2.96744	0.0259497	0.0972956	0.0682555	Batf/Cd69/Il6	3	0.00638298
BP	GO:0047497	mitochondrion transport along microtubule	3/470	26/18913	0.115385	4.64313	2.96744	0.0259497	0.0972956	0.0682555	Hap1/Mapt/Mgarp	3	0.00638298
BP	GO:0050965	detection of temperature stimulus involved in sensory perception of pain	3/470	26/18913	0.115385	4.64313	2.96744	0.0259497	0.0972956	0.0682555	Ano1/Cxcr4/Ntrk1	3	0.00638298
BP	GO:0060080	inhibitory postsynaptic potential	3/470	26/18913	0.115385	4.64313	2.96744	0.0259497	0.0972956	0.0682555	Adora2a/Chrna4/Cx3cl1	3	0.00638298
BP	GO:1903599	positive regulation of autophagy of mitochondrion	3/470	26/18913	0.115385	4.64313	2.96744	0.0259497	0.0972956	0.0682555	Bnip3/Hk2/Nod2	3	0.00638298
BP	GO:2000561	regulation of CD4-positive, alpha-beta T cell proliferation	3/470	26/18913	0.115385	4.64313	2.96744	0.0259497	0.0972956	0.0682555	Cd28/Tnfrsf14/Vsir	3	0.00638298
BP	GO:0006836	neurotransmitter transport	12/470	255/18913	0.0470588	1.89367	2.29359	0.0262127	0.0981232	0.0688361	Adora2a/Doc2a/Htr6/Kcnc3/Npy1r/Nrxn2/Slc1a2/Slc1a6/Slc6a7/Sptbn2/Stxbp5l/Syngr3	12	0.0255319
BP	GO:0071322	cellular response to carbohydrate stimulus	12/470	255/18913	0.0470588	1.89367	2.29359	0.0262127	0.0981232	0.0688361	Ano1/Ccl2/Crhr2/Cyp19a1/Gpr68/Il1b/Mir146a/Mir221/Mir222/Pde1c/Ppargc1a/Slc2a5	12	0.0255319
BP	GO:0046545	development of primary female sexual characteristics	9/470	170/18913	0.0529412	2.13038	2.36336	0.0264959	0.0991033	0.0695237	Adcyap1r1/Cdh6/Cyp19a1/Fst/Mmp13/Nefh/Notch4/Vegfa/Wnt4	9	0.0191489
BP	GO:0007272	ensheathment of neurons	10/470	198/18913	0.0505051	2.03234	2.33112	0.0266081	0.0993625	0.0697055	Cxcr4/Dhh/Mal2/Mir23b/Mir27b/Ndrg1/Ngfr/Ptprz1/Tlr2/Tnf	10	0.0212766
BP	GO:0008366	axon ensheathment	10/470	198/18913	0.0505051	2.03234	2.33112	0.0266081	0.0993625	0.0697055	Cxcr4/Dhh/Mal2/Mir23b/Mir27b/Ndrg1/Ngfr/Ptprz1/Tlr2/Tnf	10	0.0212766
BP	GO:0008637	apoptotic mitochondrial changes	7/470	117/18913	0.0598291	2.40755	2.43795	0.026871	0.100263	0.0703376	Bik/Bnip3/Higd1a/Hk2/Ier3/Mmp9/Ppp2r2b	7	0.0148936
BP	GO:0051785	positive regulation of nuclear division	5/470	68/18913	0.0735294	2.95885	2.58321	0.0269115	0.100334	0.0703871	Cd28/Il1a/Il1b/Tnf/Wnt4	5	0.0106383
BP	GO:0051651	maintenance of location in cell	11/470	227/18913	0.0484581	1.94998	2.29863	0.026977	0.100352	0.0703998	Atp7b/Bdkrb1/Ccl3/Coro1a/Cx3cl1/Cxcl10/Ero1a/Hap1/Hk2/P2ry6/Tspo	11	0.0234043
BP	GO:0001916	positive regulation of T cell mediated cytotoxicity	4/470	46/18913	0.0869565	3.49917	2.7091	0.0270245	0.100352	0.0703998	Il12b/RT1-CE1/RT1-CE16/RT1-S3	4	0.00851064
BP	GO:0005978	glycogen biosynthetic process	4/470	46/18913	0.0869565	3.49917	2.7091	0.0270245	0.100352	0.0703998	Gbe1/Ppp1r3b/Ppp1r3c/Ppp1r3g	4	0.00851064
BP	GO:0009250	glucan biosynthetic process	4/470	46/18913	0.0869565	3.49917	2.7091	0.0270245	0.100352	0.0703998	Gbe1/Ppp1r3b/Ppp1r3c/Ppp1r3g	4	0.00851064
BP	GO:0030501	positive regulation of bone mineralization	4/470	46/18913	0.0869565	3.49917	2.7091	0.0270245	0.100352	0.0703998	Adgrv1/Osr1/Wnt10b/Wnt4	4	0.00851064
BP	GO:0005977	glycogen metabolic process	6/470	92/18913	0.0652174	2.62438	2.49322	0.0271138	0.100442	0.0704629	Gbe1/Khk/Ppp1r3b/Ppp1r3c/Ppp1r3g/Pygl	6	0.012766
BP	GO:0033574	response to testosterone	6/470	92/18913	0.0652174	2.62438	2.49322	0.0271138	0.100442	0.0704629	Adh1c/Car9/Cyp19a1/Gpi/Thbs1/Tspo	6	0.012766
BP	GO:0050871	positive regulation of B cell activation	6/470	92/18913	0.0652174	2.62438	2.49322	0.0271138	0.100442	0.0704629	Cd28/Cd40/Il6/Nod2/Syk/Vav3	6	0.012766
BP	GO:0071260	cellular response to mechanical stimulus	8/470	144/18913	0.0555556	2.23558	2.37593	0.0275869	0.102113	0.0716352	Ankrd1/Bnip3/Cd40/Il1b/Kcnj4/Ptgs2/Slc2a1/Vegfa	8	0.0170213
BP	GO:0045927	positive regulation of growth	14/470	317/18913	0.044164	1.77718	2.22763	0.027813	0.102868	0.0721648	C3/Cpne5/Cxcl16/Cxcr4/Dcx/Hopx/Ikzf1/Mapt/Mfsd2a/Mir222/Ntn1/Syt17/Tgfbr3/Vegfa	14	0.0297872
BP	GO:0045862	positive regulation of proteolysis	15/470	348/18913	0.0431034	1.7345	2.20768	0.028142	0.104002	0.0729603	Angptl8/Aph1b/Cbfa2t3/Dapk1/Egln3/Il1b/Klhl40/Mir27b/Ngfr/Ret/Slc1a1/Syk/Tnf/Tnfsf15/Vsir	15	0.0319149
BP	GO:0030307	positive regulation of cell growth	10/470	200/18913	0.05	2.01202	2.29686	0.0282523	0.104326	0.0731879	Cpne5/Cxcl16/Cxcr4/Dcx/Mapt/Mfsd2a/Mir222/Ntn1/Syt17/Vegfa	10	0.0212766
BP	GO:0042446	hormone biosynthetic process	5/470	69/18913	0.0724638	2.91597	2.54524	0.0284433	0.104644	0.073411	Cacna1h/Cyp19a1/Ppargc1a/Stc2/Wnt4	5	0.0106383
BP	GO:2000142	regulation of DNA-templated transcription initiation	5/470	69/18913	0.0724638	2.91597	2.54524	0.0284433	0.104644	0.073411	Fosl1/Ikzf1/Morc1/Nfkbia/Wnt10b	5	0.0106383
BP	GO:0002082	regulation of oxidative phosphorylation	3/470	27/18913	0.111111	4.47116	2.8813	0.0286685	0.104644	0.073411	Ak4/Cimap2/Tnf	3	0.00638298
BP	GO:0002484	antigen processing and presentation of endogenous peptide antigen via MHC class I via ER pathway	3/470	27/18913	0.111111	4.47116	2.8813	0.0286685	0.104644	0.073411	RT1-CE1/RT1-CE16/RT1-S3	3	0.00638298
BP	GO:0010884	positive regulation of lipid storage	3/470	27/18913	0.111111	4.47116	2.8813	0.0286685	0.104644	0.073411	C3/Cidea/Zc3h12a	3	0.00638298
BP	GO:0032700	negative regulation of interleukin-17 production	3/470	27/18913	0.111111	4.47116	2.8813	0.0286685	0.104644	0.073411	Il12b/Tlr2/Vsir	3	0.00638298
BP	GO:0032770	positive regulation of monooxygenase activity	3/470	27/18913	0.111111	4.47116	2.8813	0.0286685	0.104644	0.073411	Gch1/Il1b/Tnf	3	0.00638298
BP	GO:0032930	positive regulation of superoxide anion generation	3/470	27/18913	0.111111	4.47116	2.8813	0.0286685	0.104644	0.073411	Cxcl1/Mapt/Syk	3	0.00638298
BP	GO:0045649	regulation of macrophage differentiation	3/470	27/18913	0.111111	4.47116	2.8813	0.0286685	0.104644	0.073411	Csf2/Id2/Il34	3	0.00638298
BP	GO:0090280	positive regulation of calcium ion import	3/470	27/18913	0.111111	4.47116	2.8813	0.0286685	0.104644	0.073411	Ccl2/Cxcr4/Stc1	3	0.00638298
BP	GO:0035886	vascular associated smooth muscle cell differentiation	4/470	47/18913	0.0851064	3.42472	2.65688	0.0289775	0.104644	0.073411	Adm/C3/Mir221/Vegfa	4	0.00851064
BP	GO:0043368	positive T cell selection	4/470	47/18913	0.0851064	3.42472	2.65688	0.0289775	0.104644	0.073411	Batf/Cd69/Il6/Zap70	4	0.00851064
BP	GO:0045622	regulation of T-helper cell differentiation	4/470	47/18913	0.0851064	3.42472	2.65688	0.0289775	0.104644	0.073411	Cd69/Il6/Nfkbiz/Zc3h12a	4	0.00851064
BP	GO:0048147	negative regulation of fibroblast proliferation	4/470	47/18913	0.0851064	3.42472	2.65688	0.0289775	0.104644	0.073411	C1ql4/Fth1/Kcnn4/Mmp9	4	0.00851064
BP	GO:1903146	regulation of autophagy of mitochondrion	4/470	47/18913	0.0851064	3.42472	2.65688	0.0289775	0.104644	0.073411	Bnip3/Hk2/Nod2/Tspo	4	0.00851064
BP	GO:0045861	negative regulation of proteolysis	14/470	319/18913	0.0438871	1.76604	2.20273	0.0291214	0.104644	0.073411	Adora2a/Gpi/Il6/Klhl40/Mmp9/Ptgs2/Serpina3a/Serpina3n/Serpinb10/Serpinb2/Slpi/Thbs1/Tnf/Vegfa	14	0.0297872
BP	GO:0002246	wound healing involved in inflammatory response	2/470	11/18913	0.181818	7.31644	3.34516	0.0292183	0.104644	0.073411	Hmox1/Il1a	2	0.00425532
BP	GO:0006067	ethanol metabolic process	2/470	11/18913	0.181818	7.31644	3.34516	0.0292183	0.104644	0.073411	Adh1c/Adh7	2	0.00425532
BP	GO:0008627	intrinsic apoptotic signaling pathway in response to osmotic stress	2/470	11/18913	0.181818	7.31644	3.34516	0.0292183	0.104644	0.073411	Bdkrb2/Ptgs2	2	0.00425532
BP	GO:0009174	pyrimidine ribonucleoside monophosphate biosynthetic process	2/470	11/18913	0.181818	7.31644	3.34516	0.0292183	0.104644	0.073411	Cda/Upp1	2	0.00425532
BP	GO:0010193	response to ozone	2/470	11/18913	0.181818	7.31644	3.34516	0.0292183	0.104644	0.073411	Il1a/Il1b	2	0.00425532
BP	GO:0016338	calcium-independent cell-cell adhesion via plasma membrane cell-adhesion molecules	2/470	11/18913	0.181818	7.31644	3.34516	0.0292183	0.104644	0.073411	Cldn1/Cx3cl1	2	0.00425532
BP	GO:0032277	negative regulation of gonadotropin secretion	2/470	11/18913	0.181818	7.31644	3.34516	0.0292183	0.104644	0.073411	Crhr2/Fst	2	0.00425532
BP	GO:0033212	iron import into cell	2/470	11/18913	0.181818	7.31644	3.34516	0.0292183	0.104644	0.073411	Lcn2/Steap4	2	0.00425532
BP	GO:0034651	cortisol biosynthetic process	2/470	11/18913	0.181818	7.31644	3.34516	0.0292183	0.104644	0.073411	Cacna1h/Wnt4	2	0.00425532
BP	GO:0036462	TRAIL-activated apoptotic signaling pathway	2/470	11/18913	0.181818	7.31644	3.34516	0.0292183	0.104644	0.073411	Mir221/Mir222	2	0.00425532
BP	GO:0043653	mitochondrial fragmentation involved in apoptotic process	2/470	11/18913	0.181818	7.31644	3.34516	0.0292183	0.104644	0.073411	Bnip3/Ppp2r2b	2	0.00425532
BP	GO:0043922	negative regulation by host of viral transcription	2/470	11/18913	0.181818	7.31644	3.34516	0.0292183	0.104644	0.073411	Ccl3/Hmox1	2	0.00425532
BP	GO:0051599	response to hydrostatic pressure	2/470	11/18913	0.181818	7.31644	3.34516	0.0292183	0.104644	0.073411	Cyp19a1/Ntrk1	2	0.00425532
BP	GO:0071317	cellular response to isoquinoline alkaloid	2/470	11/18913	0.181818	7.31644	3.34516	0.0292183	0.104644	0.073411	Ccl5/RT1-Bb	2	0.00425532
BP	GO:0071492	cellular response to UV-A	2/470	11/18913	0.181818	7.31644	3.34516	0.0292183	0.104644	0.073411	Mmp3/Mmp9	2	0.00425532
BP	GO:0072237	metanephric proximal tubule development	2/470	11/18913	0.181818	7.31644	3.34516	0.0292183	0.104644	0.073411	Anpep/Slc2a5	2	0.00425532
BP	GO:0090184	positive regulation of kidney development	2/470	11/18913	0.181818	7.31644	3.34516	0.0292183	0.104644	0.073411	Ret/Wnt4	2	0.00425532
BP	GO:1901202	negative regulation of extracellular matrix assembly	2/470	11/18913	0.181818	7.31644	3.34516	0.0292183	0.104644	0.073411	Mir27b/Tgfbr3	2	0.00425532
BP	GO:1902645	tertiary alcohol biosynthetic process	2/470	11/18913	0.181818	7.31644	3.34516	0.0292183	0.104644	0.073411	Cacna1h/Wnt4	2	0.00425532
BP	GO:1903596	regulation of gap junction assembly	2/470	11/18913	0.181818	7.31644	3.34516	0.0292183	0.104644	0.073411	Hopx/Il1b	2	0.00425532
BP	GO:1904373	response to kainic acid	2/470	11/18913	0.181818	7.31644	3.34516	0.0292183	0.104644	0.073411	Epor/Lcn2	2	0.00425532
BP	GO:2000109	regulation of macrophage apoptotic process	2/470	11/18913	0.181818	7.31644	3.34516	0.0292183	0.104644	0.073411	Ccl5/Nod2	2	0.00425532
BP	GO:2000171	negative regulation of dendrite development	2/470	11/18913	0.181818	7.31644	3.34516	0.0292183	0.104644	0.073411	Mgarp/Ptprz1	2	0.00425532
BP	GO:0042886	amide transport	17/470	412/18913	0.0412621	1.66041	2.16353	0.0292956	0.10484	0.0735484	Ano1/Apln/Ccl5/Crhr2/Ffar4/Gipr/Gnaz/Gpr68/Il1b/Il1rn/Il6/Nmu/Nos2/Pde1c/Sstr2/Stxbp5l/Tnf	17	0.0361702
BP	GO:0003014	renal system process	8/470	146/18913	0.0547945	2.20495	2.3332	0.0296195	0.105806	0.074226	Adm/Adora2a/Amn/Bdkrb1/Kcnma1/Kcnn4/Podxl/Stc1	8	0.0170213
BP	GO:0050864	regulation of B cell activation	8/470	146/18913	0.0547945	2.20495	2.3332	0.0296195	0.105806	0.074226	Cd28/Cd40/Id2/Il6/Nod2/Syk/Tnfaip3/Vav3	8	0.0170213
BP	GO:0010827	regulation of D-glucose transmembrane transport	6/470	94/18913	0.0638298	2.56854	2.43367	0.0297252	0.105806	0.074226	C3/Ffar4/Hk2/Il1b/Slc1a2/Tnf	6	0.012766
BP	GO:0044042	glucan metabolic process	6/470	94/18913	0.0638298	2.56854	2.43367	0.0297252	0.105806	0.074226	Gbe1/Khk/Ppp1r3b/Ppp1r3c/Ppp1r3g/Pygl	6	0.012766
BP	GO:0048525	negative regulation of viral process	6/470	94/18913	0.0638298	2.56854	2.43367	0.0297252	0.105806	0.074226	Ccl5/Hmox1/Oasl/Rsad2/Slpi/Tnf	6	0.012766
BP	GO:0060135	maternal process involved in female pregnancy	6/470	94/18913	0.0638298	2.56854	2.43367	0.0297252	0.105806	0.074226	Ccl2/Epor/Ptgs2/Stc1/Stc2/Wnt4	6	0.012766
BP	GO:1990090	cellular response to nerve growth factor stimulus	6/470	94/18913	0.0638298	2.56854	2.43367	0.0297252	0.105806	0.074226	Coro1a/Gria2/Lcn2/Mir221/Mir222/Ntrk1	6	0.012766
BP	GO:0022029	telencephalon cell migration	5/470	70/18913	0.0714286	2.87432	2.50795	0.0300293	0.106807	0.0749278	Cxcr4/Dab1/Dcx/Htr6/Slit1	5	0.0106383
BP	GO:0001938	positive regulation of endothelial cell proliferation	7/470	120/18913	0.0583333	2.34736	2.36362	0.0302889	0.107647	0.0755176	Apln/Ccl2/Hmox1/Mir101a/Mir146a/Mir27b/Vegfa	7	0.0148936
BP	GO:0006631	fatty acid metabolic process	18/470	446/18913	0.0403587	1.62405	2.12908	0.0307077	0.109052	0.0765033	Abcc9/Acot1/Adh7/Akr1c15/Bdkrb1/C3/Cyp1a1/Cyp2c11/Faah/Fabp4/Gsta1/Il1b/Mfsd2a/Olah/Pla2g2a/Pla2g5/Ppargc1a/Ptgs2	18	0.0382979
BP	GO:0007431	salivary gland development	4/470	48/18913	0.0833333	3.35337	2.60606	0.031012	0.109881	0.0770843	Esrp2/Il6/Tgm2/Tnf	4	0.00851064
BP	GO:0019432	triglyceride biosynthetic process	4/470	48/18913	0.0833333	3.35337	2.60606	0.031012	0.109881	0.0770843	C3/Gpat3/Mfsd2a/Mogat1	4	0.00851064
BP	GO:0045494	photoreceptor cell maintenance	4/470	48/18913	0.0833333	3.35337	2.60606	0.031012	0.109881	0.0770843	Abca4/Adgrv1/Prom1/Slc2a1	4	0.00851064
BP	GO:0008593	regulation of Notch signaling pathway	6/470	95/18913	0.0631579	2.5415	2.40448	0.0310907	0.110075	0.0772209	Dtx1/Hey1/Jag2/Nfkbia/Nod2/Notch4	6	0.012766
BP	GO:1904951	positive regulation of establishment of protein localization	16/470	384/18913	0.0416667	1.67668	2.13859	0.0313106	0.110769	0.0777078	Adora2a/Ankrd1/Ano1/Ccl2/Gipr/Gpr68/Hcar2/Il1a/Il6/Kcnn4/Mmp13/Nmu/Ptgs2/Tlr2/Tnf/Zc3h12a	16	0.0340426
BP	GO:0002363	alpha-beta T cell lineage commitment	3/470	28/18913	0.107143	4.31147	2.79926	0.0315323	0.110793	0.0777244	Batf/Cd69/Il6	3	0.00638298
BP	GO:0008211	glucocorticoid metabolic process	3/470	28/18913	0.107143	4.31147	2.79926	0.0315323	0.110793	0.0777244	Cacna1h/Hsd11b1/Wnt4	3	0.00638298
BP	GO:0010742	macrophage derived foam cell differentiation	3/470	28/18913	0.107143	4.31147	2.79926	0.0315323	0.110793	0.0777244	Csf2/Nfkbia/Pla2g5	3	0.00638298
BP	GO:0015740	C4-dicarboxylate transport	3/470	28/18913	0.107143	4.31147	2.79926	0.0315323	0.110793	0.0777244	Slc1a1/Slc1a2/Slc1a6	3	0.00638298
BP	GO:0032303	regulation of icosanoid secretion	3/470	28/18913	0.107143	4.31147	2.79926	0.0315323	0.110793	0.0777244	Il1a/Il1b/Syk	3	0.00638298
BP	GO:0045061	thymic T cell selection	3/470	28/18913	0.107143	4.31147	2.79926	0.0315323	0.110793	0.0777244	Cd28/Jag2/Zap70	3	0.00638298
BP	GO:0072234	metanephric nephron tubule development	3/470	28/18913	0.107143	4.31147	2.79926	0.0315323	0.110793	0.0777244	Anpep/Osr1/Slc2a5	3	0.00638298
BP	GO:0098664	G protein-coupled serotonin receptor signaling pathway	3/470	28/18913	0.107143	4.31147	2.79926	0.0315323	0.110793	0.0777244	Gnaz/Htr5b/Htr6	3	0.00638298
BP	GO:2000319	regulation of T-helper 17 cell differentiation	3/470	28/18913	0.107143	4.31147	2.79926	0.0315323	0.110793	0.0777244	Cd69/Nfkbiz/Zc3h12a	3	0.00638298
BP	GO:0002820	negative regulation of adaptive immune response	5/470	71/18913	0.0704225	2.83383	2.47131	0.0316699	0.111108	0.0779454	Cd69/Nod2/Tnfrsf14/Vsir/Zc3h12a	5	0.0106383
BP	GO:0050982	detection of mechanical stimulus	5/470	71/18913	0.0704225	2.83383	2.47131	0.0316699	0.111108	0.0779454	Adgrv1/Cxcr4/Ntrk1/Phf24/Tnf	5	0.0106383
BP	GO:0046887	positive regulation of hormone secretion	10/470	204/18913	0.0490196	1.97257	2.22953	0.0317553	0.111323	0.0780965	Ano1/Apln/Cyp19a1/Ffar4/Gipr/Gpr68/Hcar2/Il6/Nmu/Tnf	10	0.0212766
BP	GO:0071333	cellular response to glucose stimulus	11/470	233/18913	0.0472103	1.89976	2.20607	0.0317799	0.111326	0.0780979	Ano1/Ccl2/Crhr2/Cyp19a1/Gpr68/Il1b/Mir146a/Mir221/Mir222/Pde1c/Ppargc1a	11	0.0234043
BP	GO:0030101	natural killer cell activation	6/470	96/18913	0.0625	2.51503	2.37565	0.0324965	0.113579	0.0796785	Coro1a/Id2/Ikzf1/Il12b/Pglyrp1/Pglyrp2	6	0.012766
BP	GO:0032370	positive regulation of lipid transport	6/470	96/18913	0.0625	2.51503	2.37565	0.0324965	0.113579	0.0796785	Cyp19a1/Il1a/Il1b/Il6/Nfkbia/Tnf	6	0.012766
BP	GO:2000628	regulation of miRNA metabolic process	6/470	96/18913	0.0625	2.51503	2.37565	0.0324965	0.113579	0.0796785	Apln/Fosl1/Il6/Ngfr/Tnf/Zc3h12a	6	0.012766
BP	GO:1901655	cellular response to ketone	11/470	234/18913	0.0470085	1.89164	2.19091	0.0326358	0.11398	0.0799599	Ass1/Ccl2/Ccl5/Ddit4/Il6/Mir221/Mir222/Mir27b/P2ry6/RT1-Bb/Vegfa	11	0.0234043
BP	GO:1990138	neuron projection extension	10/470	205/18913	0.0487805	1.96295	2.21293	0.0326767	0.114037	0.0799998	Clstn3/Cpne5/Cxcr4/Dcx/Mapt/Mir222/Ntn1/Slit1/Syt17/Vegfa	10	0.0212766
BP	GO:0021761	limbic system development	9/470	177/18913	0.0508475	2.04612	2.2322	0.0331216	0.115094	0.0807416	Crhr2/Cyp19a1/Dab1/Dcx/Hap1/Mfsd2a/Nefh/Neurod6/Ptprz1	9	0.0191489
BP	GO:0001774	microglial cell activation	4/470	49/18913	0.0816327	3.28493	2.55656	0.0331286	0.115094	0.0807416	Cx3cl1/Kcnn4/Tlr2/Tnf	4	0.00851064
BP	GO:0033028	myeloid cell apoptotic process	4/470	49/18913	0.0816327	3.28493	2.55656	0.0331286	0.115094	0.0807416	Ccl5/Hcar2/Il6/Nod2	4	0.00851064
BP	GO:0043507	positive regulation of JUN kinase activity	4/470	49/18913	0.0816327	3.28493	2.55656	0.0331286	0.115094	0.0807416	Il1b/Il1rn/Syk/Tnf	4	0.00851064
BP	GO:0045840	positive regulation of mitotic nuclear division	4/470	49/18913	0.0816327	3.28493	2.55656	0.0331286	0.115094	0.0807416	Cd28/Il1a/Il1b/Tnf	4	0.00851064
BP	GO:0046685	response to arsenic-containing substance	4/470	49/18913	0.0816327	3.28493	2.55656	0.0331286	0.115094	0.0807416	Cyp1a1/Hmox1/Nefh/Zc3h12a	4	0.00851064
BP	GO:0051091	positive regulation of DNA-binding transcription factor activity	11/470	235/18913	0.0468085	1.88359	2.17582	0.0335081	0.116169	0.0814957	Crhr2/Fosl1/Il1b/Il6/Nod2/Ntrk1/Ppargc1a/Tgfbr3/Tlr2/Tnf/Wnt10b	11	0.0234043
BP	GO:0006094	gluconeogenesis	6/470	97/18913	0.0618557	2.4891	2.34719	0.0339429	0.116169	0.0814957	Aldoc/Eno2/Gpi/Il6/Pgk1/Ppargc1a	6	0.012766
BP	GO:0019229	regulation of vasoconstriction	6/470	97/18913	0.0618557	2.4891	2.34719	0.0339429	0.116169	0.0814957	Adm/Apln/Cx3cl1/Faah/Npy1r/Ptgs2	6	0.012766
BP	GO:0050868	negative regulation of T cell activation	8/470	150/18913	0.0533333	2.14616	2.24978	0.0339891	0.116169	0.0814957	Adora2a/Cd69/Dtx1/Pla2g5/RT1-Bb/Tnfrsf14/Vsir/Zc3h12a	8	0.0170213
BP	GO:0002399	MHC class II protein complex assembly	2/470	12/18913	0.166667	6.70674	3.15673	0.0344944	0.116169	0.0814957	RT1-Bb/RT1-DMb	2	0.00425532
BP	GO:0002503	peptide antigen assembly with MHC class II protein complex	2/470	12/18913	0.166667	6.70674	3.15673	0.0344944	0.116169	0.0814957	RT1-Bb/RT1-DMb	2	0.00425532
BP	GO:0002778	antibacterial peptide production	2/470	12/18913	0.166667	6.70674	3.15673	0.0344944	0.116169	0.0814957	Evpl/Nod2	2	0.00425532
BP	GO:0002866	positive regulation of acute inflammatory response to antigenic stimulus	2/470	12/18913	0.166667	6.70674	3.15673	0.0344944	0.116169	0.0814957	C3/Fcgr2a	2	0.00425532
BP	GO:0015870	acetylcholine transport	2/470	12/18913	0.166667	6.70674	3.15673	0.0344944	0.116169	0.0814957	Adora2a/Htr6	2	0.00425532
BP	GO:0015911	long-chain fatty acid import across plasma membrane	2/470	12/18913	0.166667	6.70674	3.15673	0.0344944	0.116169	0.0814957	Slc2a1/Thbs1	2	0.00425532
BP	GO:0032224	positive regulation of synaptic transmission, cholinergic	2/470	12/18913	0.166667	6.70674	3.15673	0.0344944	0.116169	0.0814957	Adora2a/Ngfr	2	0.00425532
BP	GO:0032342	aldosterone biosynthetic process	2/470	12/18913	0.166667	6.70674	3.15673	0.0344944	0.116169	0.0814957	Cacna1h/Wnt4	2	0.00425532
BP	GO:0032815	negative regulation of natural killer cell activation	2/470	12/18913	0.166667	6.70674	3.15673	0.0344944	0.116169	0.0814957	Pglyrp1/Pglyrp2	2	0.00425532
BP	GO:0033632	regulation of cell-cell adhesion mediated by integrin	2/470	12/18913	0.166667	6.70674	3.15673	0.0344944	0.116169	0.0814957	Ccl5/Podxl	2	0.00425532
BP	GO:0034115	negative regulation of heterotypic cell-cell adhesion	2/470	12/18913	0.166667	6.70674	3.15673	0.0344944	0.116169	0.0814957	Il1rn/Mir221	2	0.00425532
BP	GO:0035745	T-helper 2 cell cytokine production	2/470	12/18913	0.166667	6.70674	3.15673	0.0344944	0.116169	0.0814957	Il6/Rsad2	2	0.00425532
BP	GO:0046884	follicle-stimulating hormone secretion	2/470	12/18913	0.166667	6.70674	3.15673	0.0344944	0.116169	0.0814957	Crhr2/Fst	2	0.00425532
BP	GO:0048845	venous blood vessel morphogenesis	2/470	12/18913	0.166667	6.70674	3.15673	0.0344944	0.116169	0.0814957	Notch4/Vegfa	2	0.00425532
BP	GO:0060536	cartilage morphogenesis	2/470	12/18913	0.166667	6.70674	3.15673	0.0344944	0.116169	0.0814957	Matn1/Stc1	2	0.00425532
BP	GO:0061517	macrophage proliferation	2/470	12/18913	0.166667	6.70674	3.15673	0.0344944	0.116169	0.0814957	Cx3cl1/Il34	2	0.00425532
BP	GO:0070391	response to lipoteichoic acid	2/470	12/18913	0.166667	6.70674	3.15673	0.0344944	0.116169	0.0814957	Ccl20/Tlr2	2	0.00425532
BP	GO:0070587	regulation of cell-cell adhesion involved in gastrulation	2/470	12/18913	0.166667	6.70674	3.15673	0.0344944	0.116169	0.0814957	Il1rn/Mir221	2	0.00425532
BP	GO:0070671	response to interleukin-12	2/470	12/18913	0.166667	6.70674	3.15673	0.0344944	0.116169	0.0814957	Il12b/Ticam2	2	0.00425532
BP	GO:0071223	cellular response to lipoteichoic acid	2/470	12/18913	0.166667	6.70674	3.15673	0.0344944	0.116169	0.0814957	Ccl20/Tlr2	2	0.00425532
BP	GO:0071864	positive regulation of cell proliferation in bone marrow	2/470	12/18913	0.166667	6.70674	3.15673	0.0344944	0.116169	0.0814957	Il6/Mir27b	2	0.00425532
BP	GO:0071873	response to norepinephrine	2/470	12/18913	0.166667	6.70674	3.15673	0.0344944	0.116169	0.0814957	Il1rn/Ppargc1a	2	0.00425532
BP	GO:0071888	macrophage apoptotic process	2/470	12/18913	0.166667	6.70674	3.15673	0.0344944	0.116169	0.0814957	Ccl5/Nod2	2	0.00425532
BP	GO:0072182	regulation of nephron tubule epithelial cell differentiation	2/470	12/18913	0.166667	6.70674	3.15673	0.0344944	0.116169	0.0814957	Osr1/Prom1	2	0.00425532
BP	GO:1902513	regulation of organelle transport along microtubule	2/470	12/18913	0.166667	6.70674	3.15673	0.0344944	0.116169	0.0814957	Hap1/Nefh	2	0.00425532
BP	GO:1904016	response to Thyroglobulin triiodothyronine	2/470	12/18913	0.166667	6.70674	3.15673	0.0344944	0.116169	0.0814957	Slc2a1/Slc2a3	2	0.00425532
BP	GO:1904681	response to 3-methylcholanthrene	2/470	12/18913	0.166667	6.70674	3.15673	0.0344944	0.116169	0.0814957	Cyp1a1/Hmox1	2	0.00425532
BP	GO:1990637	response to prolactin	2/470	12/18913	0.166667	6.70674	3.15673	0.0344944	0.116169	0.0814957	Atp7b/Il6	2	0.00425532
BP	GO:2000551	regulation of T-helper 2 cell cytokine production	2/470	12/18913	0.166667	6.70674	3.15673	0.0344944	0.116169	0.0814957	Il6/Rsad2	2	0.00425532
BP	GO:2000672	negative regulation of motor neuron apoptotic process	2/470	12/18913	0.166667	6.70674	3.15673	0.0344944	0.116169	0.0814957	Cntfr/Crlf1	2	0.00425532
BP	GO:2001280	positive regulation of unsaturated fatty acid biosynthetic process	2/470	12/18913	0.166667	6.70674	3.15673	0.0344944	0.116169	0.0814957	Il1b/Ptgs2	2	0.00425532
BP	GO:0002029	desensitization of G protein-coupled receptor signaling pathway	3/470	29/18913	0.103448	4.1628	2.72098	0.0345401	0.116169	0.0814957	Adm/Apln/Gipr	3	0.00638298
BP	GO:0002504	antigen processing and presentation of peptide or polysaccharide antigen via MHC class II	3/470	29/18913	0.103448	4.1628	2.72098	0.0345401	0.116169	0.0814957	RT1-Bb/RT1-DMb/Thbs1	3	0.00638298
BP	GO:0009649	entrainment of circadian clock	3/470	29/18913	0.103448	4.1628	2.72098	0.0345401	0.116169	0.0814957	Bhlhe40/Fbxl21/Id2	3	0.00638298
BP	GO:0014821	phasic smooth muscle contraction	3/470	29/18913	0.103448	4.1628	2.72098	0.0345401	0.116169	0.0814957	Kcnma1/Npy1r/Sstr2	3	0.00638298
BP	GO:0035235	ionotropic glutamate receptor signaling pathway	3/470	29/18913	0.103448	4.1628	2.72098	0.0345401	0.116169	0.0814957	Gria2/Grin1/Grin2c	3	0.00638298
BP	GO:0035994	response to muscle stretch	3/470	29/18913	0.103448	4.1628	2.72098	0.0345401	0.116169	0.0814957	Ankrd1/Gpi/Nfkbia	3	0.00638298
BP	GO:0071276	cellular response to cadmium ion	3/470	29/18913	0.103448	4.1628	2.72098	0.0345401	0.116169	0.0814957	Hmox1/Mt1/Slc11a1	3	0.00638298
BP	GO:0090077	foam cell differentiation	3/470	29/18913	0.103448	4.1628	2.72098	0.0345401	0.116169	0.0814957	Csf2/Nfkbia/Pla2g5	3	0.00638298
BP	GO:1904037	positive regulation of epithelial cell apoptotic process	3/470	29/18913	0.103448	4.1628	2.72098	0.0345401	0.116169	0.0814957	Hmox1/Mir222/Ppargc1a	3	0.00638298
BP	GO:0008584	male gonad development	10/470	207/18913	0.0483092	1.94398	2.18002	0.0345756	0.116204	0.0815204	Bik/Cyp19a1/Dhh/Il1a/Jag2/Kdm3a/Map7/Ntrk1/Utf1/Wnt4	10	0.0212766
BP	GO:0021885	forebrain cell migration	5/470	73/18913	0.0684932	2.75619	2.39991	0.0351165	0.117851	0.0826759	Cxcr4/Dab1/Dcx/Htr6/Slit1	5	0.0106383
BP	GO:0060350	endochondral bone morphogenesis	5/470	73/18913	0.0684932	2.75619	2.39991	0.0351165	0.117851	0.0826759	Matn1/Mmp13/Phospho1/Stc1/Thbs1	5	0.0106383
BP	GO:0046390	ribose phosphate biosynthetic process	8/470	151/18913	0.0529801	2.13194	2.22934	0.0351463	0.117866	0.0826862	Adss1/Ak4/Cda/Gucy1a1/Gucy1b1/Gucy2c/Pygl/Upp1	8	0.0170213
BP	GO:0000041	transition metal ion transport	7/470	124/18913	0.0564516	2.27164	2.2679	0.0352847	0.118047	0.0828131	Atp7b/Fth1/Hephl1/Lcn2/Slc11a1/Slc1a1/Steap4	7	0.0148936
BP	GO:0000266	mitochondrial fission	4/470	50/18913	0.08	3.21923	2.50833	0.0353275	0.118047	0.0828131	Bnip3/Mapt/Ppargc1a/Ppp2r2b	4	0.00851064
BP	GO:0033628	regulation of cell adhesion mediated by integrin	4/470	50/18913	0.08	3.21923	2.50833	0.0353275	0.118047	0.0828131	Ccl5/Podxl/Ret/Syk	4	0.00851064
BP	GO:0050922	negative regulation of chemotaxis	4/470	50/18913	0.08	3.21923	2.50833	0.0353275	0.118047	0.0828131	Ccl2/Cyp19a1/Slit1/Thbs1	4	0.00851064
BP	GO:1900744	regulation of p38MAPK cascade	4/470	50/18913	0.08	3.21923	2.50833	0.0353275	0.118047	0.0828131	Il1b/Kcnn4/Vegfa/Zc3h12a	4	0.00851064
BP	GO:1990089	response to nerve growth factor	6/470	98/18913	0.0612245	2.4637	2.31907	0.0354304	0.118305	0.0829945	Coro1a/Gria2/Lcn2/Mir221/Mir222/Ntrk1	6	0.012766
BP	GO:0002221	pattern recognition receptor signaling pathway	12/470	267/18913	0.0449438	1.80856	2.12411	0.0354944	0.118434	0.0830846	Fosl1/Mir146a/Nfkbia/Nfkbiz/Nod2/Oasl/Rsad2/Ticam2/Tlr2/Tnf/Tnfaip3/Tnip3	12	0.0255319
BP	GO:0046546	development of primary male sexual characteristics	10/470	208/18913	0.0480769	1.93464	2.1637	0.0355534	0.118545	0.0831628	Bik/Cyp19a1/Dhh/Il1a/Jag2/Kdm3a/Map7/Ntrk1/Utf1/Wnt4	10	0.0212766
BP	GO:0007189	adenylate cyclase-activating G protein-coupled receptor signaling pathway	9/470	180/18913	0.05	2.01202	2.17783	0.0362841	0.120895	0.084811	Adgre1/Adm/Adora2a/Adrb3/Cxcl10/Ffar4/Gipr/Htr6/S1pr5	9	0.0191489
BP	GO:0032715	negative regulation of interleukin-6 production	5/470	74/18913	0.0675676	2.71895	2.36511	0.0369234	0.12276	0.0861197	Mir101a/Mir146a/Tnf/Tnfaip3/Zc3h12a	5	0.0106383
BP	GO:0046677	response to antibiotic	5/470	74/18913	0.0675676	2.71895	2.36511	0.0369234	0.12276	0.0861197	Gria2/Grin1/Hpse/Il1b/Rasgrf1	5	0.0106383
BP	GO:0051932	synaptic transmission, GABAergic	5/470	74/18913	0.0675676	2.71895	2.36511	0.0369234	0.12276	0.0861197	Adora2a/Clstn3/Grm1/Hap1/Phf24	5	0.0106383
BP	GO:0046330	positive regulation of JNK cascade	6/470	99/18913	0.0606061	2.43881	2.29131	0.0369592	0.122791	0.0861415	Ccdc88c/Il1a/Il1b/Mturn/Nod2/Tnf	6	0.012766
BP	GO:0010976	positive regulation of neuron projection development	11/470	239/18913	0.0460251	1.85207	2.1162	0.0371621	0.123377	0.0865525	Ankrd1/Cx3cl1/Cxcl6/Epor/Hap1/Il6/Mapt/Ngfr/Ntrk1/Ptprz1/Ret	11	0.0234043
BP	GO:0007589	body fluid secretion	8/470	153/18913	0.0522876	2.10407	2.18892	0.0375401	0.124155	0.087098	Ano1/Atp7b/Hk2/Kcnma1/Kcnn4/Mir222/Mmp13/Vegfa	8	0.0170213
BP	GO:1903115	regulation of actin filament-based movement	4/470	51/18913	0.0784314	3.15611	2.4613	0.037609	0.124155	0.087098	Acta2/Cacna1h/Dsc2/Stc1	4	0.00851064
BP	GO:0006691	leukotriene metabolic process	3/470	30/18913	0.1	4.02404	2.64615	0.0376908	0.124155	0.087098	Pla2g5/Syk/Tlr2	3	0.00638298
BP	GO:0006837	serotonin transport	3/470	30/18913	0.1	4.02404	2.64615	0.0376908	0.124155	0.087098	Crhr2/Fcgr2a/Syk	3	0.00638298
BP	GO:0022401	negative adaptation of signaling pathway	3/470	30/18913	0.1	4.02404	2.64615	0.0376908	0.124155	0.087098	Adm/Apln/Gipr	3	0.00638298
BP	GO:0023058	adaptation of signaling pathway	3/470	30/18913	0.1	4.02404	2.64615	0.0376908	0.124155	0.087098	Adm/Apln/Gipr	3	0.00638298
BP	GO:0043369	CD4-positive or CD8-positive, alpha-beta T cell lineage commitment	3/470	30/18913	0.1	4.02404	2.64615	0.0376908	0.124155	0.087098	Batf/Cd69/Il6	3	0.00638298
BP	GO:0050961	detection of temperature stimulus involved in sensory perception	3/470	30/18913	0.1	4.02404	2.64615	0.0376908	0.124155	0.087098	Ano1/Cxcr4/Ntrk1	3	0.00638298
BP	GO:0060009	Sertoli cell development	3/470	30/18913	0.1	4.02404	2.64615	0.0376908	0.124155	0.087098	Il1a/Map7/Ntrk1	3	0.00638298
BP	GO:0060544	regulation of necroptotic process	3/470	30/18913	0.1	4.02404	2.64615	0.0376908	0.124155	0.087098	Birc3/Mir101a/Mir221	3	0.00638298
BP	GO:1902170	cellular response to reactive nitrogen species	3/470	30/18913	0.1	4.02404	2.64615	0.0376908	0.124155	0.087098	Gucy1b1/Ppargc1a/Thbs1	3	0.00638298
BP	GO:0045833	negative regulation of lipid metabolic process	7/470	126/18913	0.0555556	2.23558	2.22141	0.0379757	0.125004	0.087694	Ccdc3/Cidea/Hcar2/Il1b/Mfsd2a/Tnf/Wnt4	7	0.0148936
BP	GO:0019319	hexose biosynthetic process	6/470	100/18913	0.06	2.41443	2.26388	0.0385296	0.126648	0.088847	Aldoc/Eno2/Gpi/Il6/Pgk1/Ppargc1a	6	0.012766
BP	GO:0033209	tumor necrosis factor-mediated signaling pathway	6/470	100/18913	0.06	2.41443	2.26388	0.0385296	0.126648	0.088847	Ccdc3/Mir27b/Nfkbia/Plvap/Syk/Tnf	6	0.012766
BP	GO:1905330	regulation of morphogenesis of an epithelium	5/470	75/18913	0.0666667	2.6827	2.33088	0.0387863	0.127401	0.0893756	Cxcl10/Lcn2/Tnf/Vegfa/Wnt4	5	0.0106383
BP	GO:0030048	actin filament-based movement	7/470	127/18913	0.0551181	2.21798	2.19849	0.0393703	0.128644	0.0902472	Abcc9/Acta2/Cacna1h/Ccdc88c/Dsc2/Myh2/Stc1	7	0.0148936
BP	GO:0032479	regulation of type I interferon production	7/470	127/18913	0.0551181	2.21798	2.19849	0.0393703	0.128644	0.0902472	Arrdc4/Gbp7/Irf8/Mmp12/Syk/Ticam2/Tlr2	7	0.0148936
BP	GO:0032606	type I interferon production	7/470	127/18913	0.0551181	2.21798	2.19849	0.0393703	0.128644	0.0902472	Arrdc4/Gbp7/Irf8/Mmp12/Syk/Ticam2/Tlr2	7	0.0148936
BP	GO:0045860	positive regulation of protein kinase activity	13/470	302/18913	0.0430464	1.7322	2.04763	0.0394987	0.128644	0.0902472	Card10/Chi3l1/Dab1/Higd1a/Il1b/Il1rn/Il34/Slc11a1/Slc1a1/Syk/Thbs1/Tnf/Tnfsf15	13	0.0276596
BP	GO:0001893	maternal placenta development	4/470	52/18913	0.0769231	3.09542	2.41541	0.0399732	0.128644	0.0902472	Epor/Ptgs2/Stc1/Stc2	4	0.00851064
BP	GO:0032350	regulation of hormone metabolic process	4/470	52/18913	0.0769231	3.09542	2.41541	0.0399732	0.128644	0.0902472	Kcnma1/Ppargc1a/Stc2/Wnt4	4	0.00851064
BP	GO:0021782	glial cell development	8/470	155/18913	0.0516129	2.07693	2.14912	0.040041	0.128644	0.0902472	Adora2a/Ano1/Dhh/Id2/Il1b/Mt2A/Ndrg1/Tlr2	8	0.0170213
BP	GO:0031331	positive regulation of cellular catabolic process	11/470	242/18913	0.0454545	1.82911	2.07223	0.0400797	0.128644	0.0902472	Bnip3/Dapk1/Hk2/Hmox1/Il1b/Mir222/Nod2/Rnf152/Tlr2/Tnf/Zc3h12a	11	0.0234043
BP	GO:0000101	sulfur amino acid transport	2/470	13/18913	0.153846	6.19083	2.98868	0.0401076	0.128644	0.0902472	Slc1a1/Slc1a2	2	0.00425532
BP	GO:0002138	retinoic acid biosynthetic process	2/470	13/18913	0.153846	6.19083	2.98868	0.0401076	0.128644	0.0902472	Cyp1a1/Rbp1	2	0.00425532
BP	GO:0002756	MyD88-independent toll-like receptor signaling pathway	2/470	13/18913	0.153846	6.19083	2.98868	0.0401076	0.128644	0.0902472	Ticam2/Tnip3	2	0.00425532
BP	GO:0005981	regulation of glycogen catabolic process	2/470	13/18913	0.153846	6.19083	2.98868	0.0401076	0.128644	0.0902472	Ppp1r3b/Ppp1r3c	2	0.00425532
BP	GO:0006705	mineralocorticoid biosynthetic process	2/470	13/18913	0.153846	6.19083	2.98868	0.0401076	0.128644	0.0902472	Cacna1h/Wnt4	2	0.00425532
BP	GO:0014832	urinary bladder smooth muscle contraction	2/470	13/18913	0.153846	6.19083	2.98868	0.0401076	0.128644	0.0902472	Bdkrb2/Kcnma1	2	0.00425532
BP	GO:0016102	diterpenoid biosynthetic process	2/470	13/18913	0.153846	6.19083	2.98868	0.0401076	0.128644	0.0902472	Cyp1a1/Rbp1	2	0.00425532
BP	GO:0030223	neutrophil differentiation	2/470	13/18913	0.153846	6.19083	2.98868	0.0401076	0.128644	0.0902472	Csf2/Ikzf1	2	0.00425532
BP	GO:0032490	detection of molecule of bacterial origin	2/470	13/18913	0.153846	6.19083	2.98868	0.0401076	0.128644	0.0902472	Nod2/Tlr2	2	0.00425532
BP	GO:0034374	low-density lipoprotein particle remodeling	2/470	13/18913	0.153846	6.19083	2.98868	0.0401076	0.128644	0.0902472	Pla2g5/Pla2g7	2	0.00425532
BP	GO:0034650	cortisol metabolic process	2/470	13/18913	0.153846	6.19083	2.98868	0.0401076	0.128644	0.0902472	Cacna1h/Wnt4	2	0.00425532
BP	GO:0042454	ribonucleoside catabolic process	2/470	13/18913	0.153846	6.19083	2.98868	0.0401076	0.128644	0.0902472	Cda/Upp1	2	0.00425532
BP	GO:0045602	negative regulation of endothelial cell differentiation	2/470	13/18913	0.153846	6.19083	2.98868	0.0401076	0.128644	0.0902472	Notch4/Vegfa	2	0.00425532
BP	GO:0048304	positive regulation of isotype switching to IgG isotypes	2/470	13/18913	0.153846	6.19083	2.98868	0.0401076	0.128644	0.0902472	Cd28/Cd40	2	0.00425532
BP	GO:0051549	positive regulation of keratinocyte migration	2/470	13/18913	0.153846	6.19083	2.98868	0.0401076	0.128644	0.0902472	Epb41l4b/Mmp9	2	0.00425532
BP	GO:0051775	response to redox state	2/470	13/18913	0.153846	6.19083	2.98868	0.0401076	0.128644	0.0902472	Arhgdib/Nos2	2	0.00425532
BP	GO:0060073	micturition	2/470	13/18913	0.153846	6.19083	2.98868	0.0401076	0.128644	0.0902472	Bdkrb1/Kcnma1	2	0.00425532
BP	GO:0060137	maternal process involved in parturition	2/470	13/18913	0.153846	6.19083	2.98868	0.0401076	0.128644	0.0902472	Ccl2/Cyp1a1	2	0.00425532
BP	GO:0070099	regulation of chemokine-mediated signaling pathway	2/470	13/18913	0.153846	6.19083	2.98868	0.0401076	0.128644	0.0902472	Ccl5/Mir101a	2	0.00425532
BP	GO:0070344	regulation of fat cell proliferation	2/470	13/18913	0.153846	6.19083	2.98868	0.0401076	0.128644	0.0902472	Fabp4/Fgf16	2	0.00425532
BP	GO:0070586	cell-cell adhesion involved in gastrulation	2/470	13/18913	0.153846	6.19083	2.98868	0.0401076	0.128644	0.0902472	Il1rn/Mir221	2	0.00425532
BP	GO:0071803	positive regulation of podosome assembly	2/470	13/18913	0.153846	6.19083	2.98868	0.0401076	0.128644	0.0902472	Csf2/Tnf	2	0.00425532
BP	GO:0090036	regulation of protein kinase C signaling	2/470	13/18913	0.153846	6.19083	2.98868	0.0401076	0.128644	0.0902472	Adgrv1/Cd40	2	0.00425532
BP	GO:0097084	vascular associated smooth muscle cell development	2/470	13/18913	0.153846	6.19083	2.98868	0.0401076	0.128644	0.0902472	Adm/Vegfa	2	0.00425532
BP	GO:0110075	regulation of ferroptosis	2/470	13/18913	0.153846	6.19083	2.98868	0.0401076	0.128644	0.0902472	Fth1/Hmox1	2	0.00425532
BP	GO:1901374	acetate ester transport	2/470	13/18913	0.153846	6.19083	2.98868	0.0401076	0.128644	0.0902472	Adora2a/Htr6	2	0.00425532
BP	GO:1900542	regulation of purine nucleotide metabolic process	6/470	101/18913	0.0594059	2.39052	2.23678	0.0401418	0.128665	0.0902618	Cbfa2t3/Ddit4/Hsd11b1/Ier3/Ppargc1a/Tspo	6	0.012766
BP	GO:0032147	activation of protein kinase activity	5/470	76/18913	0.0657895	2.6474	2.29721	0.0407056	0.130375	0.0914614	Card10/Chi3l1/Slc11a1/Slc1a1/Tnfsf15	5	0.0106383
BP	GO:0051963	regulation of synapse assembly	10/470	213/18913	0.0469484	1.88922	2.08344	0.0407315	0.130375	0.0914614	Clstn3/Dcx/Grin1/Mdga2/Nrxn2/Ntn1/Ntrk1/Podxl/Slit1/Tlr2	10	0.0212766
BP	GO:0019885	antigen processing and presentation of endogenous peptide antigen via MHC class I	3/470	31/18913	0.0967742	3.89423	2.5745	0.0409831	0.130819	0.0917728	RT1-CE1/RT1-CE16/RT1-S3	3	0.00638298
BP	GO:0021554	optic nerve development	3/470	31/18913	0.0967742	3.89423	2.5745	0.0409831	0.130819	0.0917728	Kcna2/Kcna3/Kcnc3	3	0.00638298
BP	GO:0034104	negative regulation of tissue remodeling	3/470	31/18913	0.0967742	3.89423	2.5745	0.0409831	0.130819	0.0917728	Cyp19a1/Il6/Vegfa	3	0.00638298
BP	GO:0048011	neurotrophin TRK receptor signaling pathway	3/470	31/18913	0.0967742	3.89423	2.5745	0.0409831	0.130819	0.0917728	Ddit4/Hap1/Ntrk1	3	0.00638298
BP	GO:0098773	skin epidermis development	8/470	156/18913	0.0512821	2.06361	2.12944	0.0413322	0.131842	0.0924909	Cldn1/Fst/Hpse/Nfkbiz/Ngfr/Sostdc1/Tnf/Wnt10b	8	0.0170213
BP	GO:0002269	leukocyte activation involved in inflammatory response	4/470	53/18913	0.0754717	3.03701	2.37062	0.0424202	0.134942	0.0946652	Cx3cl1/Kcnn4/Tlr2/Tnf	4	0.00851064
BP	GO:0032881	regulation of polysaccharide metabolic process	4/470	53/18913	0.0754717	3.03701	2.37062	0.0424202	0.134942	0.0946652	Khk/Ppp1r3b/Ppp1r3c/Ppp1r3g	4	0.00851064
BP	GO:0045124	regulation of bone resorption	4/470	53/18913	0.0754717	3.03701	2.37062	0.0424202	0.134942	0.0946652	Cyp19a1/Il6/Syk/Vegfa	4	0.00851064
BP	GO:1902622	regulation of neutrophil migration	4/470	53/18913	0.0754717	3.03701	2.37062	0.0424202	0.134942	0.0946652	Il1a/Il1b/Nod2/Tlr2	4	0.00851064
BP	GO:0050731	positive regulation of peptidyl-tyrosine phosphorylation	8/470	157/18913	0.0509554	2.05047	2.10991	0.0426507	0.135401	0.0949879	Csf3/Il34/Il6/Nod2/Ptprz1/Syk/Tnfrsf14/Vegfa	8	0.0170213
BP	GO:0021545	cranial nerve development	5/470	77/18913	0.0649351	2.61301	2.26408	0.0426815	0.135401	0.0949879	Hes3/Kcna2/Kcna3/Kcnc3/Ntrk1	5	0.0106383
BP	GO:0045123	cellular extravasation	5/470	77/18913	0.0649351	2.61301	2.26408	0.0426815	0.135401	0.0949879	Ccl2/Ccl5/Mir146a/Plvap/Tnf	5	0.0106383
BP	GO:0097421	liver regeneration	5/470	77/18913	0.0649351	2.61301	2.26408	0.0426815	0.135401	0.0949879	Cldn1/Hmox1/Il6/Nfkbia/Tnf	5	0.0106383
BP	GO:0048167	regulation of synaptic plasticity	15/470	369/18913	0.0406504	1.63579	1.96891	0.0434467	0.137693	0.0965956	Adora2a/Bhlhe40/Crhr2/Grin1/Grin2c/Htr6/Mapt/Mir101a/Mir221/Mir222/Mir23b/Mmp9/Ptgs2/Rasgrf1/Slc1a1	15	0.0319149
BP	GO:0006112	energy reserve metabolic process	6/470	103/18913	0.0582524	2.3441	2.18353	0.043493	0.137693	0.0965956	Gbe1/Khk/Ppp1r3b/Ppp1r3c/Ppp1r3g/Pygl	6	0.012766
BP	GO:0042490	mechanoreceptor differentiation	6/470	103/18913	0.0582524	2.3441	2.18353	0.043493	0.137693	0.0965956	Adgrv1/Hey1/Jag2/Kcnma1/Mcoln3/Ntrk1	6	0.012766
BP	GO:0048145	regulation of fibroblast proliferation	7/470	130/18913	0.0538462	2.16679	2.13101	0.0437536	0.138424	0.0971081	C1ql4/Fth1/Kcnn4/Mmp9/Ngfr/Ptprz1/Rasgrf1	7	0.0148936
BP	GO:0005980	glycogen catabolic process	3/470	32/18913	0.09375	3.77254	2.50578	0.0444153	0.139565	0.0979089	Ppp1r3b/Ppp1r3c/Pygl	3	0.00638298
BP	GO:0007187	G protein-coupled receptor signaling pathway, coupled to cyclic nucleotide second messenger	3/470	32/18913	0.09375	3.77254	2.50578	0.0444153	0.139565	0.0979089	Htr5b/Htr6/Nos2	3	0.00638298
BP	GO:0008045	motor neuron axon guidance	3/470	32/18913	0.09375	3.77254	2.50578	0.0444153	0.139565	0.0979089	Cxcr4/Ntn1/Slit1	3	0.00638298
BP	GO:0014059	regulation of dopamine secretion	3/470	32/18913	0.09375	3.77254	2.50578	0.0444153	0.139565	0.0979089	Chrna4/Htr6/Kcna2	3	0.00638298
BP	GO:0032682	negative regulation of chemokine production	3/470	32/18913	0.09375	3.77254	2.50578	0.0444153	0.139565	0.0979089	Il6/Mir146a/Ticam2	3	0.00638298
BP	GO:0048266	behavioral response to pain	3/470	32/18913	0.09375	3.77254	2.50578	0.0444153	0.139565	0.0979089	Ntrk1/Thbs1/Tspo	3	0.00638298
BP	GO:0060402	calcium ion transport into cytosol	3/470	32/18913	0.09375	3.77254	2.50578	0.0444153	0.139565	0.0979089	Adcyap1r1/Cacna1i/Grin1	3	0.00638298
BP	GO:0072243	metanephric nephron epithelium development	3/470	32/18913	0.09375	3.77254	2.50578	0.0444153	0.139565	0.0979089	Anpep/Osr1/Slc2a5	3	0.00638298
BP	GO:0072574	hepatocyte proliferation	3/470	32/18913	0.09375	3.77254	2.50578	0.0444153	0.139565	0.0979089	Il6/Tnf/Tnfaip3	3	0.00638298
BP	GO:0072575	epithelial cell proliferation involved in liver morphogenesis	3/470	32/18913	0.09375	3.77254	2.50578	0.0444153	0.139565	0.0979089	Il6/Tnf/Tnfaip3	3	0.00638298
BP	GO:0032481	positive regulation of type I interferon production	5/470	78/18913	0.0641026	2.57951	2.23146	0.0447143	0.140315	0.0984345	Arrdc4/Mmp12/Syk/Ticam2/Tlr2	5	0.0106383
BP	GO:0043489	RNA stabilization	5/470	78/18913	0.0641026	2.57951	2.23146	0.0447143	0.140315	0.0984345	Larp1bl/Slc11a1/Slfn2/Tent5c/Vegfa	5	0.0106383
BP	GO:0001889	liver development	12/470	277/18913	0.0433213	1.74327	1.98935	0.0448447	0.140569	0.0986129	Ak4/Ass1/Cldn1/Cyp1a1/Frzb/Hmox1/Il6/Nfkbia/Tgfbr3/Tnf/Tnfaip3/Wnt4	12	0.0255319
BP	GO:0003009	skeletal muscle contraction	4/470	54/18913	0.0740741	2.98077	2.32688	0.0449498	0.140569	0.0986129	Myh3/Rcsd1/Stac2/Tnf	4	0.00851064
BP	GO:0045601	regulation of endothelial cell differentiation	4/470	54/18913	0.0740741	2.98077	2.32688	0.0449498	0.140569	0.0986129	Il1b/Notch4/Tnf/Vegfa	4	0.00851064
BP	GO:0046638	positive regulation of alpha-beta T cell differentiation	4/470	54/18913	0.0740741	2.98077	2.32688	0.0449498	0.140569	0.0986129	Il6/Nfkbiz/Syk/Zap70	4	0.00851064
BP	GO:0051092	positive regulation of NF-kappaB transcription factor activity	7/470	131/18913	0.0534351	2.15025	2.10892	0.0452818	0.140569	0.0986129	Crhr2/Il1b/Nod2/Ntrk1/Tgfbr3/Tlr2/Tnf	7	0.0148936
BP	GO:0001781	neutrophil apoptotic process	2/470	14/18913	0.142857	5.74863	2.83736	0.046038	0.140569	0.0986129	Hcar2/Il6	2	0.00425532
BP	GO:0002551	mast cell chemotaxis	2/470	14/18913	0.142857	5.74863	2.83736	0.046038	0.140569	0.0986129	Ccl5/Vegfa	2	0.00425532
BP	GO:0002883	regulation of hypersensitivity	2/470	14/18913	0.142857	5.74863	2.83736	0.046038	0.140569	0.0986129	C3/Fcgr2a	2	0.00425532
BP	GO:0006213	pyrimidine nucleoside metabolic process	2/470	14/18913	0.142857	5.74863	2.83736	0.046038	0.140569	0.0986129	Cda/Upp1	2	0.00425532
BP	GO:0006750	glutathione biosynthetic process	2/470	14/18913	0.142857	5.74863	2.83736	0.046038	0.140569	0.0986129	Slc1a1/Slc1a2	2	0.00425532
BP	GO:0006825	copper ion transport	2/470	14/18913	0.142857	5.74863	2.83736	0.046038	0.140569	0.0986129	Atp7b/Steap4	2	0.00425532
BP	GO:0009130	pyrimidine nucleoside monophosphate biosynthetic process	2/470	14/18913	0.142857	5.74863	2.83736	0.046038	0.140569	0.0986129	Cda/Upp1	2	0.00425532
BP	GO:0010624	regulation of Schwann cell proliferation	2/470	14/18913	0.142857	5.74863	2.83736	0.046038	0.140569	0.0986129	Mir221/Mir222	2	0.00425532
BP	GO:0010819	regulation of T cell chemotaxis	2/470	14/18913	0.142857	5.74863	2.83736	0.046038	0.140569	0.0986129	Ccl5/Cxcl10	2	0.00425532
BP	GO:0010936	negative regulation of macrophage cytokine production	2/470	14/18913	0.142857	5.74863	2.83736	0.046038	0.140569	0.0986129	Acp5/Nod2	2	0.00425532
BP	GO:0019370	leukotriene biosynthetic process	2/470	14/18913	0.142857	5.74863	2.83736	0.046038	0.140569	0.0986129	Pla2g5/Syk	2	0.00425532
BP	GO:0019852	L-ascorbic acid metabolic process	2/470	14/18913	0.142857	5.74863	2.83736	0.046038	0.140569	0.0986129	Clstn3/Ero1a	2	0.00425532
BP	GO:0030432	peristalsis	2/470	14/18913	0.142857	5.74863	2.83736	0.046038	0.140569	0.0986129	Npy1r/Sstr2	2	0.00425532
BP	GO:0031392	regulation of prostaglandin biosynthetic process	2/470	14/18913	0.142857	5.74863	2.83736	0.046038	0.140569	0.0986129	Il1b/Ptgs2	2	0.00425532
BP	GO:0031915	positive regulation of synaptic plasticity	2/470	14/18913	0.142857	5.74863	2.83736	0.046038	0.140569	0.0986129	Mmp9/Ptgs2	2	0.00425532
BP	GO:0034116	positive regulation of heterotypic cell-cell adhesion	2/470	14/18913	0.142857	5.74863	2.83736	0.046038	0.140569	0.0986129	Il1b/Tnf	2	0.00425532
BP	GO:0035305	negative regulation of dephosphorylation	2/470	14/18913	0.142857	5.74863	2.83736	0.046038	0.140569	0.0986129	Mir146a/Tnf	2	0.00425532
BP	GO:0036006	cellular response to macrophage colony-stimulating factor stimulus	2/470	14/18913	0.142857	5.74863	2.83736	0.046038	0.140569	0.0986129	Ccl2/Tlr2	2	0.00425532
BP	GO:0038180	nerve growth factor signaling pathway	2/470	14/18913	0.142857	5.74863	2.83736	0.046038	0.140569	0.0986129	Coro1a/Ntrk1	2	0.00425532
BP	GO:0045060	negative thymic T cell selection	2/470	14/18913	0.142857	5.74863	2.83736	0.046038	0.140569	0.0986129	Cd28/Zap70	2	0.00425532
BP	GO:0046049	UMP metabolic process	2/470	14/18913	0.142857	5.74863	2.83736	0.046038	0.140569	0.0986129	Cda/Upp1	2	0.00425532
BP	GO:0046886	positive regulation of hormone biosynthetic process	2/470	14/18913	0.142857	5.74863	2.83736	0.046038	0.140569	0.0986129	Ppargc1a/Wnt4	2	0.00425532
BP	GO:0048102	autophagic cell death	2/470	14/18913	0.142857	5.74863	2.83736	0.046038	0.140569	0.0986129	Bnip3/Dapk1	2	0.00425532
BP	GO:0060346	bone trabecula formation	2/470	14/18913	0.142857	5.74863	2.83736	0.046038	0.140569	0.0986129	Vegfa/Wnt10b	2	0.00425532
BP	GO:0061043	regulation of vascular wound healing	2/470	14/18913	0.142857	5.74863	2.83736	0.046038	0.140569	0.0986129	Cxcr4/Tnf	2	0.00425532
BP	GO:0070673	response to interleukin-18	2/470	14/18913	0.142857	5.74863	2.83736	0.046038	0.140569	0.0986129	Cldn1/Ticam2	2	0.00425532
BP	GO:0072683	T cell extravasation	2/470	14/18913	0.142857	5.74863	2.83736	0.046038	0.140569	0.0986129	Ccl2/Ccl5	2	0.00425532
BP	GO:0090649	response to oxygen-glucose deprivation	2/470	14/18913	0.142857	5.74863	2.83736	0.046038	0.140569	0.0986129	Bnip3/Nos2	2	0.00425532
BP	GO:0097707	ferroptosis	2/470	14/18913	0.142857	5.74863	2.83736	0.046038	0.140569	0.0986129	Fth1/Hmox1	2	0.00425532
BP	GO:0106049	regulation of cellular response to osmotic stress	2/470	14/18913	0.142857	5.74863	2.83736	0.046038	0.140569	0.0986129	Bdkrb2/Ptgs2	2	0.00425532
BP	GO:1902510	regulation of apoptotic DNA fragmentation	2/470	14/18913	0.142857	5.74863	2.83736	0.046038	0.140569	0.0986129	Cidea/Il6	2	0.00425532
BP	GO:1903165	response to polycyclic arene	2/470	14/18913	0.142857	5.74863	2.83736	0.046038	0.140569	0.0986129	Cyp1a1/Hmox1	2	0.00425532
BP	GO:1904464	regulation of matrix metallopeptidase secretion	2/470	14/18913	0.142857	5.74863	2.83736	0.046038	0.140569	0.0986129	Mir146a/Tlr2	2	0.00425532
BP	GO:1990773	matrix metallopeptidase secretion	2/470	14/18913	0.142857	5.74863	2.83736	0.046038	0.140569	0.0986129	Mir146a/Tlr2	2	0.00425532
BP	GO:2000347	positive regulation of hepatocyte proliferation	2/470	14/18913	0.142857	5.74863	2.83736	0.046038	0.140569	0.0986129	Tnf/Tnfaip3	2	0.00425532
BP	GO:2000562	negative regulation of CD4-positive, alpha-beta T cell proliferation	2/470	14/18913	0.142857	5.74863	2.83736	0.046038	0.140569	0.0986129	Tnfrsf14/Vsir	2	0.00425532
BP	GO:0009913	epidermal cell differentiation	11/470	248/18913	0.0443548	1.78486	1.98612	0.0463845	0.141503	0.0992679	Cers3/Evpl/Hey1/Il1a/Jag2/Kcnma1/Lce1m/Maff/Mcoln3/Nfkbiz/Sult2b1	11	0.0234043
BP	GO:0009267	cellular response to starvation	10/470	218/18913	0.0458716	1.84589	2.00531	0.0464048	0.141503	0.0992679	Acp5/Dsc2/Higd1a/Mfsd2a/Rnf152/Rragd/Slc2a1/Upp1/Wnt4/Zc3h12a	10	0.0212766
BP	GO:2001235	positive regulation of apoptotic signaling pathway	9/470	189/18913	0.047619	1.91621	2.02083	0.0469955	0.14308	0.100374	Adora2a/G0s2/Mir27b/Ngfr/Ret/Septin4/Thbs1/Tnf/Tnfsf15	9	0.0191489
BP	GO:0009408	response to heat	6/470	105/18913	0.0571429	2.29945	2.1315	0.0470145	0.14308	0.100374	Ano1/Cxcl10/Hmox1/Il1a/Mapt/Ptgs2	6	0.012766
BP	GO:0045582	positive regulation of T cell differentiation	6/470	105/18913	0.0571429	2.29945	2.1315	0.0470145	0.14308	0.100374	Il6/Nfkbiz/Syk/Vsir/Wnt10b/Zap70	6	0.012766
BP	GO:0001914	regulation of T cell mediated cytotoxicity	4/470	55/18913	0.0727273	2.92658	2.28413	0.0475621	0.144179	0.101145	Il12b/RT1-CE1/RT1-CE16/RT1-S3	4	0.00851064
BP	GO:0002686	negative regulation of leukocyte migration	4/470	55/18913	0.0727273	2.92658	2.28413	0.0475621	0.144179	0.101145	Ccl2/Cd69/Cyp19a1/Mir146a	4	0.00851064
BP	GO:0015872	dopamine transport	4/470	55/18913	0.0727273	2.92658	2.28413	0.0475621	0.144179	0.101145	Chrna4/Htr6/Kcna2/Tgm2	4	0.00851064
BP	GO:0042149	cellular response to glucose starvation	4/470	55/18913	0.0727273	2.92658	2.28413	0.0475621	0.144179	0.101145	Higd1a/Slc2a1/Upp1/Zc3h12a	4	0.00851064
BP	GO:0042181	ketone biosynthetic process	4/470	55/18913	0.0727273	2.92658	2.28413	0.0475621	0.144179	0.101145	Cacna1h/Cyp19a1/Ppargc1a/Wnt4	4	0.00851064
BP	GO:0051403	stress-activated MAPK cascade	4/470	55/18913	0.0727273	2.92658	2.28413	0.0475621	0.144179	0.101145	Crhr2/Il1a/Il1b/Nod2	4	0.00851064
BP	GO:0007369	gastrulation	10/470	219/18913	0.0456621	1.83746	1.98993	0.0476003	0.1442	0.10116	Apln/Dusp4/Gpi/Il1rn/Itga8/Lamb3/Mesp2/Mir221/Mmp9/Osr1	10	0.0212766
BP	GO:0061008	hepaticobiliary system development	12/470	280/18913	0.0428571	1.72459	1.94999	0.047954	0.144331	0.101252	Ak4/Ass1/Cldn1/Cyp1a1/Frzb/Hmox1/Il6/Nfkbia/Tgfbr3/Tnf/Tnfaip3/Wnt4	12	0.0255319
BP	GO:0002483	antigen processing and presentation of endogenous peptide antigen	3/470	33/18913	0.0909091	3.65822	2.43977	0.0479859	0.144331	0.101252	RT1-CE1/RT1-CE16/RT1-S3	3	0.00638298
BP	GO:0002828	regulation of type 2 immune response	3/470	33/18913	0.0909091	3.65822	2.43977	0.0479859	0.144331	0.101252	Il6/Nod2/Rsad2	3	0.00638298
BP	GO:0005979	regulation of glycogen biosynthetic process	3/470	33/18913	0.0909091	3.65822	2.43977	0.0479859	0.144331	0.101252	Ppp1r3b/Ppp1r3c/Ppp1r3g	3	0.00638298
BP	GO:0009251	glucan catabolic process	3/470	33/18913	0.0909091	3.65822	2.43977	0.0479859	0.144331	0.101252	Ppp1r3b/Ppp1r3c/Pygl	3	0.00638298
BP	GO:0010962	regulation of glucan biosynthetic process	3/470	33/18913	0.0909091	3.65822	2.43977	0.0479859	0.144331	0.101252	Ppp1r3b/Ppp1r3c/Ppp1r3g	3	0.00638298
BP	GO:0031000	response to caffeine	3/470	33/18913	0.0909091	3.65822	2.43977	0.0479859	0.144331	0.101252	Adora2a/Il6/Ppargc1a	3	0.00638298
BP	GO:0032026	response to magnesium ion	3/470	33/18913	0.0909091	3.65822	2.43977	0.0479859	0.144331	0.101252	C3/Slc41a1/Thbs1	3	0.00638298
BP	GO:0046885	regulation of hormone biosynthetic process	3/470	33/18913	0.0909091	3.65822	2.43977	0.0479859	0.144331	0.101252	Ppargc1a/Stc2/Wnt4	3	0.00638298
BP	GO:0071372	cellular response to follicle-stimulating hormone stimulus	3/470	33/18913	0.0909091	3.65822	2.43977	0.0479859	0.144331	0.101252	Cyp19a1/Id2/Ppargc1a	3	0.00638298
BP	GO:2000647	negative regulation of stem cell proliferation	3/470	33/18913	0.0909091	3.65822	2.43977	0.0479859	0.144331	0.101252	Mir221/Mir222/Septin4	3	0.00638298
BP	GO:0035725	sodium ion transmembrane transport	9/470	190/18913	0.0473684	1.90613	2.00391	0.0483024	0.145095	0.101788	Cacna1h/Cacna1i/Fgf11/Grin1/Mcoln3/Osr1/Scn7a/Slc41a1/Slc6a7	9	0.0191489
BP	GO:0046660	female sex differentiation	9/470	190/18913	0.0473684	1.90613	2.00391	0.0483024	0.145095	0.101788	Adcyap1r1/Cdh6/Cyp19a1/Fst/Mmp13/Nefh/Notch4/Vegfa/Wnt4	9	0.0191489
BP	GO:0046364	monosaccharide biosynthetic process	6/470	106/18913	0.0566038	2.27776	2.10593	0.0488396	0.146614	0.102853	Aldoc/Eno2/Gpi/Il6/Pgk1/Ppargc1a	6	0.012766
BP	GO:0009123	nucleoside monophosphate metabolic process	5/470	80/18913	0.0625	2.51503	2.16774	0.0489508	0.146853	0.103021	Adss1/Ak4/Cda/Dlgap2/Upp1	5	0.0106383
BP	GO:0045926	negative regulation of growth	11/470	251/18913	0.0438247	1.76352	1.94394	0.0497778	0.149237	0.104694	Adrb3/Bdkrb1/Cda/Frzb/Mt1/Mt2A/Ntn1/Rgs4/Slit1/Stc2/Wwc1	11	0.0234043
CC	GO:0009897	external side of plasma membrane	33/494	465/19285	0.0709677	2.77047	6.26603	1.46067e-07	5.38986e-05	4.47425e-05	Adgre1/Ano1/Anpep/Cd28/Cd40/Cd69/Chrna4/Clec2d2/Cntfr/Crlf1/Cxcl10/Cxcr4/Enpep/Epor/Fcgr2a/Il12b/Il6/Itga10/Itga8/Kcnma1/Ngfr/Plet1/RT1-Bb/RT1-CE1/RT1-S3/Slc1a1/Tgfbr3/Thbs1/Tlr2/Tnf/Tnfrsf14/Tnfrsf9/Vsir	33	0.0668016
CC	GO:0043235	receptor complex	29/494	402/19285	0.0721393	2.81621	5.96664	6.02453e-07	0.000111153	9.22704e-05	Adcyap1r1/Adgrv1/Adrb3/Amn/Cd40/Chrna4/Cntfr/Crlf1/Csf2/Gabrp/Gria2/Grin1/Grin2c/Grm1/Il12b/Il6/Insrr/Itga10/Itga8/Kctd16/Ntrk1/P2rx6/Plxdc1/Ret/Sstr2/Syk/Tgfbr3/Tlr2/Zap70	29	0.0587045
CC	GO:0042734	presynaptic membrane	22/494	276/19285	0.0797101	3.11176	5.72937	2.80343e-06	0.000344822	0.000286245	Adora2a/Ano1/Cacna1h/Chrna4/Fosl1/Gria2/Grin1/Grm1/Kcna2/Kcna3/Kcna4/Kcnc3/Kcnma1/Kctd16/Ngfr/Npy1r/Nrxn2/Podxl/Rgs9/Slc1a2/Slc1a6/Slc6a7	22	0.0445344
CC	GO:0098802	plasma membrane signaling receptor complex	16/494	185/19285	0.0864865	3.3763	5.26572	2.34174e-05	0.0018924	0.00157092	Cd40/Chrna4/Cntfr/Csf2/Gria2/Grin1/Grin2c/Grm1/Il6/Insrr/Itga10/Itga8/Sstr2/Syk/Tlr2/Zap70	16	0.0323887
CC	GO:0043204	perikaryon	17/494	207/19285	0.0821256	3.20606	5.17395	2.56422e-05	0.0018924	0.00157092	Ass1/Cacna1h/Ccl2/Ckmt1/Crhr2/Eno2/Gria2/Itga8/Kcna2/Kcnb2/Kcnc3/Lypd6/Nefh/Ngfr/Septin4/Slc1a1/Slc2a3	17	0.034413
CC	GO:0042611	MHC protein complex	6/494	27/19285	0.222222	8.67521	6.47074	5.13177e-05	0.00315604	0.0026199	RT1-Bb/RT1-CE11/RT1-CE14/RT1-CE16/RT1-CE2/RT1-DMb	6	0.0121457
CC	GO:0030670	phagocytic vesicle membrane	8/494	55/19285	0.145455	5.67832	5.63338	7.40586e-05	0.00390395	0.00324076	Coro1a/RT1-CE1/RT1-CE11/RT1-CE14/RT1-CE16/RT1-CE2/Slc11a1/Tlr2	8	0.0161943
CC	GO:0045121	membrane raft	21/494	327/19285	0.0642202	2.50706	4.45651	0.000115656	0.00426967	0.00354436	Adcyap1r1/Cacna1h/Eno2/Hmox1/Hpse/Kcna3/Kcnma1/Lypd6/Mal2/Mapt/Pgk1/Plvap/Podxl/Ptgs2/Slc1a1/Slc1a2/Slc2a1/Slc2a3/Tlr2/Tnf/Zap70	21	0.0425101
CC	GO:0098553	lumenal side of endoplasmic reticulum membrane	5/494	20/19285	0.25	9.75962	6.35481	0.000121843	0.00426967	0.00354436	RT1-CE1/RT1-CE11/RT1-CE14/RT1-CE16/RT1-CE2	5	0.0101215
CC	GO:0098857	membrane microdomain	21/494	329/19285	0.0638298	2.49182	4.42514	0.000125919	0.00426967	0.00354436	Adcyap1r1/Cacna1h/Eno2/Hmox1/Hpse/Kcna3/Kcnma1/Lypd6/Mal2/Mapt/Pgk1/Plvap/Podxl/Ptgs2/Slc1a1/Slc1a2/Slc2a1/Slc2a3/Tlr2/Tnf/Zap70	21	0.0425101
CC	GO:0031012	extracellular matrix	24/494	404/19285	0.0594059	2.31912	4.34459	0.000128848	0.00426967	0.00354436	Acta2/Adamts15/Angptl4/Col19a1/Col22a1/Hmcn2/Hpse/Lamb3/Matn1/Mgp/Mmp12/Mmp13/Mmp3/Mmp9/Ntn1/P3h2/Phospho1/Ptprz1/Tgfbr3/Tgm2/Thbs1/Thsd4/Vegfa/Wnt4	24	0.048583
CC	GO:0030312	external encapsulating structure	24/494	406/19285	0.0591133	2.30769	4.31784	0.000138851	0.00426967	0.00354436	Acta2/Adamts15/Angptl4/Col19a1/Col22a1/Hmcn2/Hpse/Lamb3/Matn1/Mgp/Mmp12/Mmp13/Mmp3/Mmp9/Ntn1/P3h2/Phospho1/Ptprz1/Tgfbr3/Tgm2/Thbs1/Thsd4/Vegfa/Wnt4	24	0.048583
CC	GO:0034705	potassium channel complex	10/494	96/19285	0.104167	4.06651	4.8836	0.000174713	0.00471222	0.00391172	Abcc9/Kcna2/Kcna3/Kcna4/Kcna7/Kcnb2/Kcnc3/Kcng2/Kcnma1/Kcnmb1	10	0.0202429
CC	GO:0042612	MHC class I protein complex	4/494	12/19285	0.333333	13.0128	6.74913	0.000178783	0.00471222	0.00391172	RT1-CE11/RT1-CE14/RT1-CE16/RT1-CE2	4	0.00809717
CC	GO:0008076	voltage-gated potassium channel complex	9/494	82/19285	0.109756	4.28471	4.83288	0.000246514	0.00606424	0.00503407	Kcna2/Kcna3/Kcna4/Kcna7/Kcnb2/Kcnc3/Kcng2/Kcnma1/Kcnmb1	9	0.0182186
CC	GO:0045211	postsynaptic membrane	23/494	408/19285	0.0563725	2.2007	3.97452	0.000374503	0.00863698	0.00716976	Adora2a/Cacna1h/Chrna4/Clstn3/Dlgap2/Gria2/Grin1/Grin2c/Grm1/Itga8/Kcna2/Kcna3/Kcna4/Kcnc3/Kcnj4/Kcnma1/Kcnt1/Kctd16/Mdga2/P2rx6/Ptprz1/Rgs9/Slc1a6	23	0.0465587
CC	GO:0031256	leading edge membrane	14/494	190/19285	0.0736842	2.87652	4.2146	0.00040177	0.00872077	0.00723932	Adora2a/Eps8l2/Gria2/Grin1/Itga8/Kcna2/Kcnc3/Kcnn4/Mapt/Ngfr/Psd4/Ptprz1/Slc1a2/Wwc1	14	0.0283401
CC	GO:0045335	phagocytic vesicle	11/494	127/19285	0.0866142	3.38128	4.36541	0.000428622	0.00878676	0.0072941	Coro1a/Nod2/Pla2g5/RT1-CE1/RT1-CE11/RT1-CE14/RT1-CE16/RT1-CE2/Slc11a1/Syk/Tlr2	11	0.0222672
CC	GO:0030139	endocytic vesicle	15/494	222/19285	0.0675676	2.63773	3.97934	0.000631298	0.0120347	0.00999032	Amn/Ccl2/Coro1a/Ffar4/Ngfr/Nod2/Pla2g5/RT1-CE1/RT1-CE11/RT1-CE14/RT1-CE16/RT1-CE2/Slc11a1/Syk/Tlr2	15	0.0303644
CC	GO:0031253	cell projection membrane	21/494	372/19285	0.0564516	2.20378	3.80125	0.000652289	0.0120347	0.00999032	Adora2a/Amn/Anpep/Enpep/Eps8l2/Ffar4/Gpi/Gria2/Grin1/Itga8/Kcna2/Kcnc3/Kcnn4/Mapt/Ngfr/Podxl/Prom1/Psd4/Ptprz1/Slc1a2/Wwc1	21	0.0425101
CC	GO:0030666	endocytic vesicle membrane	8/494	76/19285	0.105263	4.10931	4.40358	0.000717937	0.0126152	0.0104722	Coro1a/RT1-CE1/RT1-CE11/RT1-CE14/RT1-CE16/RT1-CE2/Slc11a1/Tlr2	8	0.0161943
CC	GO:0034702	monoatomic ion channel complex	20/494	357/19285	0.0560224	2.18703	3.67054	0.000954679	0.0160126	0.0132924	Abcc9/Cacna1h/Cacna1i/Chrna4/Gabrp/Gria2/Grin1/Grin2c/Kcna2/Kcna3/Kcna4/Kcna7/Kcnb2/Kcnc3/Kcng2/Kcnj16/Kcnj4/Kcnma1/Kcnmb1/Scn7a	20	0.0404858
CC	GO:0098576	lumenal side of membrane	5/494	31/19285	0.16129	6.29653	4.78518	0.00105867	0.0168498	0.0139874	RT1-CE1/RT1-CE11/RT1-CE14/RT1-CE16/RT1-CE2	5	0.0101215
CC	GO:0032589	neuron projection membrane	8/494	81/19285	0.0987654	3.85565	4.17579	0.00109592	0.0168498	0.0139874	Adora2a/Gria2/Grin1/Itga8/Kcnc3/Mapt/Ngfr/Slc1a2	8	0.0161943
CC	GO:0070382	exocytic vesicle	19/494	338/19285	0.056213	2.19447	3.59212	0.00121855	0.0179857	0.0149304	Cyp19a1/Doc2a/Gria2/Grin1/Hap1/Kif1a/Mal2/Npy1r/Phf24/Rab26/Septin4/Slc2a3/Slc35f1/Slc6a7/Sptbn2/Syngr3/Syt15/Syt17/Sytl3	19	0.0384615
CC	GO:0062023	collagen-containing extracellular matrix	16/494	263/19285	0.0608365	2.37496	3.64022	0.00129458	0.0182293	0.0151326	Acta2/Adamts15/Angptl4/Col19a1/Col22a1/Hmcn2/Lamb3/Matn1/Mgp/Mmp9/Ntn1/P3h2/Ptprz1/Tgfbr3/Thbs1/Vegfa	16	0.0323887
CC	GO:0043197	dendritic spine	15/494	239/19285	0.0627615	2.45011	3.65751	0.00133385	0.0182293	0.0151326	Cyp19a1/Dlgap2/Gria2/Grin1/Grm1/Hap1/Itga8/Kcna4/Kcnc3/Ngfr/P2rx6/Palmd/Ptprz1/Slc1a1/Slc1a2	15	0.0303644
CC	GO:0032982	myosin filament	4/494	20/19285	0.2	7.80769	4.93876	0.00148714	0.0195983	0.016269	Actg2/Myh1/Myh2/Myh3	4	0.00809717
CC	GO:0044309	neuron spine	15/494	243/19285	0.0617284	2.40978	3.5858	0.00157149	0.0199959	0.0165991	Cyp19a1/Dlgap2/Gria2/Grin1/Grm1/Hap1/Itga8/Kcna4/Kcnc3/Ngfr/P2rx6/Palmd/Ptprz1/Slc1a1/Slc1a2	15	0.0303644
CC	GO:0030673	axolemma	4/494	21/19285	0.190476	7.4359	4.78446	0.00180021	0.0221426	0.0183811	Adora2a/Kcnc3/Mapt/Slc1a2	4	0.00809717
CC	GO:0044304	main axon	8/494	93/19285	0.0860215	3.35815	3.69606	0.00266019	0.031608	0.0262386	Adora2a/Cd40/Crhr2/Kcna2/Kcna4/Kcnc3/Mapt/Slc1a2	8	0.0161943
CC	GO:0150034	distal axon	22/494	446/19285	0.0493274	1.92566	3.20685	0.00274108	0.031608	0.0262386	Ccl2/Crhr2/Cxcr4/Cyp19a1/Dcx/Eno2/Gria2/Grin1/Hap1/Kcna2/Kcna3/Kcnc3/Kcnma1/Mapt/Ndrg2/Ngfr/Nmu/Ptprz1/Rasgrf1/Septin4/Slc1a1/Sncb	22	0.0445344
CC	GO:0044306	neuron projection terminus	15/494	261/19285	0.0574713	2.24359	3.2797	0.00312389	0.0349308	0.0289969	Ccl2/Crhr2/Cyp19a1/Gria2/Grin1/Hap1/Kcna2/Kcna3/Kcnc3/Kcnma1/Nmu/Septin4/Slc1a1/Slc1a2/Sncb	15	0.0303644
CC	GO:0043679	axon terminus	14/494	238/19285	0.0588235	2.29638	3.26283	0.00343977	0.0373317	0.0309899	Ccl2/Crhr2/Cyp19a1/Gria2/Grin1/Hap1/Kcna2/Kcna3/Kcnc3/Kcnma1/Nmu/Septin4/Slc1a1/Sncb	14	0.0283401
CC	GO:0031252	cell leading edge	22/494	456/19285	0.0482456	1.88343	3.0955	0.00357336	0.0376734	0.0312736	Acta1/Acta2/Actg2/Adora2a/Coro1a/Cxcr4/Eps8l2/Gas7/Gdpd2/Gria2/Grin1/Itga8/Kcna2/Kcnc3/Kcnn4/Mapt/Ngfr/Podxl/Psd4/Ptprz1/Slc1a2/Wwc1	22	0.0445344
CC	GO:0016324	apical plasma membrane	21/494	439/19285	0.047836	1.86744	2.98092	0.00480437	0.0481931	0.0400063	Amn/Ano1/Car12/Cldn1/Cntfr/Enpep/Gabrp/Kcnma1/Kcnn4/P2ry6/Plet1/Podxl/Prom1/Slc16a3/Slc1a1/Slc26a9/Slc2a1/Slc2a5/Sptbn2/Stc1/Upk1b	21	0.0425101
CC	GO:1902495	transmembrane transporter complex	23/494	497/19285	0.0462777	1.80661	2.95385	0.00484773	0.0481931	0.0400063	Abcc9/C3h15orf48/Cacna1h/Cacna1i/Chrna4/Cox4i2/Gabrp/Gria2/Grin1/Grin2c/Kcna2/Kcna3/Kcna4/Kcna7/Kcnb2/Kcnc3/Kcng2/Kcnj16/Kcnj4/Kcnma1/Kcnmb1/Ndufa4l2/Scn7a	23	0.0465587
CC	GO:0005901	caveola	8/494	103/19285	0.0776699	3.03211	3.35279	0.00498117	0.0481931	0.0400063	Adcyap1r1/Cacna1h/Hmox1/Kcnma1/Plvap/Ptgs2/Slc2a1/Slc2a3	8	0.0161943
CC	GO:0034703	cation channel complex	13/494	223/19285	0.058296	2.27578	3.10694	0.00509358	0.0481931	0.0400063	Abcc9/Cacna1h/Cacna1i/Kcna2/Kcna3/Kcna4/Kcna7/Kcnb2/Kcnc3/Kcng2/Kcnma1/Kcnmb1/Scn7a	13	0.0263158
CC	GO:0008021	synaptic vesicle	16/494	308/19285	0.0519481	2.02797	2.9487	0.00612784	0.0565293	0.0469264	Cyp19a1/Doc2a/Gria2/Grin1/Hap1/Kif1a/Mal2/Npy1r/Phf24/Rab26/Septin4/Slc2a3/Slc35f1/Slc6a7/Sptbn2/Syngr3	16	0.0323887
CC	GO:0099634	postsynaptic specialization membrane	12/494	205/19285	0.0585366	2.28518	2.99943	0.0067556	0.0608004	0.0504719	Chrna4/Clstn3/Gria2/Grin1/Grin2c/Grm1/Itga8/Kcnt1/Mdga2/P2rx6/Ptprz1/Rgs9	12	0.0242915
CC	GO:0001772	immunological synapse	5/494	48/19285	0.104167	4.06651	3.44892	0.00747775	0.0627111	0.052058	Card10/Cd28/Coro1a/Vav3/Zap70	5	0.0101215
CC	GO:0008287	protein serine/threonine phosphatase complex	5/494	48/19285	0.104167	4.06651	3.44892	0.00747775	0.0627111	0.052058	Ppp1r3b/Ppp1r3c/Ppp1r3g/Ppp2r2b/Ppp2r2c	5	0.0101215
CC	GO:1903293	phosphatase complex	5/494	48/19285	0.104167	4.06651	3.44892	0.00747775	0.0627111	0.052058	Ppp1r3b/Ppp1r3c/Ppp1r3g/Ppp2r2b/Ppp2r2c	5	0.0101215
CC	GO:0097440	apical dendrite	4/494	31/19285	0.129032	5.03722	3.64746	0.00773669	0.0634409	0.0526638	Nefh/Ppargc1a/Rasgrf1/Slc1a1	4	0.00809717
CC	GO:0098839	postsynaptic density membrane	10/494	160/19285	0.0625	2.4399	2.96538	0.0083148	0.0666992	0.0553686	Clstn3/Gria2/Grin1/Grin2c/Grm1/Itga8/Kcnt1/Mdga2/Ptprz1/Rgs9	10	0.0202429
CC	GO:0000164	protein phosphatase type 1 complex	3/494	17/19285	0.176471	6.88914	3.93863	0.00869359	0.068254	0.0566593	Ppp1r3b/Ppp1r3c/Ppp1r3g	3	0.00607287
CC	GO:0001518	voltage-gated sodium channel complex	3/494	18/19285	0.166667	6.50641	3.78953	0.0102367	0.0786945	0.0653262	Cacna1h/Cacna1i/Scn7a	3	0.00607287
CC	GO:0030133	transport vesicle	20/494	454/19285	0.0440529	1.71976	2.51631	0.0136646	0.102903	0.0854219	Aph1b/Cyp19a1/Doc2a/Gria2/Grin1/Hap1/Kif1a/Mal2/Npy1r/Phf24/Rab26/Septin4/Slc2a3/Slc35f1/Slc6a7/Sptbn2/Syngr3/Syt15/Syt17/Sytl3	20	0.0404858
CC	GO:0032590	dendrite membrane	5/494	56/19285	0.0892857	3.48558	3.02016	0.0141333	0.104209	0.0865062	Gria2/Grin1/Itga8/Kcnc3/Ngfr	5	0.0101215
CC	GO:0032809	neuronal cell body membrane	4/494	37/19285	0.108108	4.22037	3.17908	0.0144028	0.104209	0.0865062	Kcna2/Kcnb2/Kcnc3/Ngfr	4	0.00809717
CC	GO:0043292	contractile muscle fiber	13/494	260/19285	0.05	1.95192	2.50561	0.0170027	0.120654	0.100158	Abcc9/Acta1/Acta2/Actg2/Ankrd1/Des/Kcnn3/Klhl40/Lmod1/Myh1/Myh2/Myh3/Slc2a1	13	0.0263158
CC	GO:0044298	cell body membrane	4/494	40/19285	0.1	3.90385	2.98079	0.0187743	0.130711	0.108507	Kcna2/Kcnb2/Kcnc3/Ngfr	4	0.00809717
CC	GO:0016323	basolateral plasma membrane	14/494	297/19285	0.047138	1.8402	2.36596	0.0214558	0.146352	0.12149	Atp7b/Car12/Car9/Cldn1/Grin1/Kcnj16/Kcnj4/Kcnn4/Nod2/P2ry6/Rasgrf1/Slc16a3/Slc2a1/Slc41a1	14	0.0283401
CC	GO:0005811	lipid droplet	7/494	109/19285	0.0642202	2.50706	2.5583	0.022083	0.146352	0.12149	Ces1a/Cidea/Clstn3/Fabp4/Rbp1/Rsad2/Tmt1b	7	0.01417
CC	GO:0030672	synaptic vesicle membrane	10/494	187/19285	0.0534759	2.08762	2.42321	0.0226072	0.146352	0.12149	Doc2a/Gria2/Grin1/Mal2/Phf24/Rab26/Slc2a3/Slc35f1/Slc6a7/Syngr3	10	0.0202429
CC	GO:0099501	exocytic vesicle membrane	10/494	187/19285	0.0534759	2.08762	2.42321	0.0226072	0.146352	0.12149	Doc2a/Gria2/Grin1/Mal2/Phf24/Rab26/Slc2a3/Slc35f1/Slc6a7/Syngr3	10	0.0202429
CC	GO:0014069	postsynaptic density	20/494	484/19285	0.0413223	1.61316	2.2151	0.0251769	0.160177	0.132967	Bnip3/Clstn3/Dapk1/Dlgap2/Egln1/Fam81a/Gria2/Grin1/Grin2c/Grm1/Itga8/Kcnt1/Mapt/Mdga2/Mmp9/Nefh/Ngfr/Ptprz1/Rgs9/Wwc1	20	0.0404858
CC	GO:0070852	cell body fiber	2/494	10/19285	0.2	7.80769	3.49132	0.0257166	0.160838	0.133515	Ass1/Crhr2	2	0.00404858
CC	GO:0044853	plasma membrane raft	8/494	140/19285	0.0571429	2.23077	2.36974	0.0278671	0.171382	0.142269	Adcyap1r1/Cacna1h/Hmox1/Kcnma1/Plvap/Ptgs2/Slc2a1/Slc2a3	8	0.0161943
CC	GO:0098858	actin-based cell projection	12/494	253/19285	0.0474308	1.85163	2.21083	0.0304306	0.18408	0.152809	Acta1/Acta2/Actg2/Adgrv1/Amn/Coro1a/Eps8l2/Kcnn3/Otop1/Podxl/Prom1/Ptprz1	12	0.0242915
CC	GO:0045277	respiratory chain complex IV	3/494	27/19285	0.111111	4.33761	2.81383	0.0309827	0.184397	0.153072	C3h15orf48/Cox4i2/Ndufa4l2	3	0.00607287
CC	GO:0098688	parallel fiber to Purkinje cell synapse	4/494	47/19285	0.0851064	3.32242	2.58462	0.0318966	0.186823	0.155086	Grin1/P2rx6/Slc1a6/Sptbn2	4	0.00809717
CC	GO:0097386	glial cell projection	4/494	48/19285	0.0833333	3.25321	2.53419	0.0341165	0.195451	0.162249	Mapt/Scn7a/Slc1a1/Slc1a2	4	0.00809717
CC	GO:0030426	growth cone	11/494	229/19285	0.0480349	1.87521	2.16024	0.0344291	0.195451	0.162249	Cxcr4/Dcx/Eno2/Gria2/Hap1/Mapt/Ndrg2/Ngfr/Ptprz1/Rasgrf1/Sncb	11	0.0222672
CC	GO:0033010	paranodal junction	2/494	12/19285	0.166667	6.50641	3.09365	0.0364685	0.202339	0.167966	Kcna2/Sptbn2	2	0.00404858
CC	GO:0034706	sodium channel complex	3/494	29/19285	0.103448	4.03846	2.65495	0.0372874	0.202339	0.167966	Cacna1h/Cacna1i/Scn7a	3	0.00607287
CC	GO:0099571	postsynaptic cytoskeleton	3/494	29/19285	0.103448	4.03846	2.65495	0.0372874	0.202339	0.167966	Filip1/Nefh/Sptbn2	3	0.00607287
CC	GO:0031528	microvillus membrane	3/494	30/19285	0.1	3.90385	2.58077	0.0406665	0.217478	0.180533	Amn/Podxl/Prom1	3	0.00607287
CC	GO:0097648	G protein-coupled receptor complex	2/494	13/19285	0.153846	6.00592	2.92738	0.0423819	0.220392	0.182953	Grm1/Sstr2	2	0.00404858
CC	GO:0030427	site of polarized growth	11/494	237/19285	0.0464135	1.81191	2.03913	0.042406	0.220392	0.182953	Cxcr4/Dcx/Eno2/Gria2/Hap1/Mapt/Ndrg2/Ngfr/Ptprz1/Rasgrf1/Sncb	11	0.0222672
CC	GO:0001891	phagocytic cup	3/494	31/19285	0.0967742	3.77792	2.50973	0.0441947	0.226498	0.188021	Coro1a/Ticam2/Tnf	3	0.00607287
CC	GO:0009925	basal plasma membrane	14/494	330/19285	0.0424242	1.65618	1.94941	0.0458545	0.231785	0.19241	Atp7b/Car12/Car9/Cldn1/Grin1/Kcnj16/Kcnj4/Kcnn4/Nod2/P2ry6/Rasgrf1/Slc16a3/Slc2a1/Slc41a1	14	0.0283401
CC	GO:0005652	nuclear lamina	2/494	14/19285	0.142857	5.57692	2.77762	0.0486245	0.234775	0.194893	Efcc1/Lmntd2	2	0.00404858
CC	GO:0005883	neurofilament	2/494	14/19285	0.142857	5.57692	2.77762	0.0486245	0.234775	0.194893	Dlgap2/Nefh	2	0.00404858
CC	GO:0042613	MHC class II protein complex	2/494	14/19285	0.142857	5.57692	2.77762	0.0486245	0.234775	0.194893	RT1-Bb/RT1-DMb	2	0.00404858
CC	GO:0016234	inclusion body	5/494	78/19285	0.0641026	2.50247	2.1558	0.0497769	0.234775	0.194893	Hap1/Mapt/Nefh/Slc2a3/Sncb	5	0.0101215
CC	GO:0048787	presynaptic active zone membrane	5/494	78/19285	0.0641026	2.50247	2.1558	0.0497769	0.234775	0.194893	Cacna1h/Gria2/Grin1/Kcnma1/Nrxn2	5	0.0101215
MF	GO:0005125	cytokine activity	31/448	198/17420	0.156566	6.08789	11.698	5.79514e-16	4.03342e-13	3.17818e-13	Ccl2/Ccl20/Ccl3/Ccl4/Ccl5/Ccl7/Crlf1/Csf2/Csf3/Cx3cl1/Cxcl1/Cxcl10/Cxcl14/Cxcl16/Cxcl2/Cxcl3/Cxcl6/Gdf5/Gpi/Il12b/Il17f/Il1a/Il1b/Il1rn/Il34/Il6/Tnf/Tnfsf15/Vegfa/Wnt10b/Wnt4	31	0.0691964
MF	GO:0008009	chemokine activity	14/448	37/17420	0.378378	14.7128	13.5659	1.61119e-13	5.60693e-11	4.41805e-11	Ccl2/Ccl20/Ccl3/Ccl4/Ccl5/Ccl7/Cx3cl1/Cxcl1/Cxcl10/Cxcl14/Cxcl16/Cxcl2/Cxcl3/Cxcl6	14	0.03125
MF	GO:0005126	cytokine receptor binding	31/448	294/17420	0.105442	4.10001	8.70948	2.91086e-11	6.75319e-09	5.32125e-09	Ccl2/Ccl20/Ccl3/Ccl4/Ccl5/Ccl7/Crlf1/Csf2/Csf3/Cx3cl1/Cxcl1/Cxcl10/Cxcl14/Cxcl16/Cxcl2/Cxcl3/Cxcl6/Il12b/Il17f/Il1a/Il1b/Il1rn/Il34/Il6/Ngfr/Ntrk1/Syk/Tgfbr3/Tnf/Tnfsf15/Vegfa	31	0.0691964
MF	GO:0042379	chemokine receptor binding	14/448	70/17420	0.2	7.77679	9.23012	2.34834e-09	4.08611e-07	3.2197e-07	Ccl2/Ccl20/Ccl3/Ccl4/Ccl5/Ccl7/Cx3cl1/Cxcl1/Cxcl10/Cxcl14/Cxcl16/Cxcl2/Cxcl3/Cxcl6	14	0.03125
MF	GO:0001664	G protein-coupled receptor binding	27/448	315/17420	0.0857143	3.33291	6.78853	4.95367e-08	6.89551e-06	5.4334e-06	Adm/Adora2a/Adrb3/Apln/Bdkrb2/C3/Ccdc88c/Ccl2/Ccl20/Ccl3/Ccl4/Ccl5/Ccl7/Cx3cl1/Cxcl1/Cxcl10/Cxcl14/Cxcl16/Cxcl2/Cxcl3/Cxcl6/Gnaz/Htr5b/Nmu/Reep1/Wnt10b/Wnt4	27	0.0602679
MF	GO:0005267	potassium channel activity	16/448	120/17420	0.133333	5.18452	7.47305	7.50437e-08	8.70506e-06	6.85925e-06	Abcc9/Gria2/Kcna2/Kcna3/Kcna4/Kcna7/Kcnb2/Kcnc3/Kcnj16/Kcnj4/Kcnma1/Kcnmb1/Kcnn3/Kcnn4/Kcnt1/Mcoln3	16	0.0357143
MF	GO:0005261	monoatomic cation channel activity	26/448	327/17420	0.0795107	3.09169	6.20363	3.84252e-07	3.82056e-05	3.01045e-05	Abcc9/Ano1/Cacna1h/Cacna1i/Chrna4/Gria2/Grin1/Grin2c/Kcna2/Kcna3/Kcna4/Kcna7/Kcnb2/Kcnc3/Kcnj16/Kcnj4/Kcnma1/Kcnmb1/Kcnn3/Kcnn4/Kcnt1/Mcoln3/Otop1/P2rx6/Panx3/Scn7a	26	0.0580357
MF	GO:0022836	gated channel activity	25/448	309/17420	0.0809061	3.14595	6.18365	4.66239e-07	4.05628e-05	3.19619e-05	Ano1/Cacna1h/Cacna1i/Chrna4/Gabrp/Gria2/Grin1/Grin2c/Kcna2/Kcna3/Kcna4/Kcna7/Kcnb2/Kcnc3/Kcnj16/Kcnj4/Kcnma1/Kcnmb1/Kcnn3/Kcnn4/Kcnt1/Mcoln3/P2rx6/Scn7a/Tmc7	25	0.0558036
MF	GO:0045236	CXCR chemokine receptor binding	6/448	14/17420	0.428571	16.6645	9.52613	7.0534e-07	5.11182e-05	4.02792e-05	Cx3cl1/Cxcl1/Cxcl10/Cxcl2/Cxcl3/Cxcl6	6	0.0133929
MF	GO:0005216	monoatomic ion channel activity	30/448	428/17420	0.0700935	2.72551	5.8722	7.34457e-07	5.11182e-05	4.02792e-05	Abcc9/Ano1/Cacna1h/Cacna1i/Chrna4/Gabrp/Gria2/Grin1/Grin2c/Kcna2/Kcna3/Kcna4/Kcna7/Kcnb2/Kcnc3/Kcnj16/Kcnj4/Kcnma1/Kcnmb1/Kcnn3/Kcnn4/Kcnt1/Mcoln3/Otop1/P2rx6/Panx3/Scn7a/Slc1a1/Slc26a9/Tmc7	30	0.0669643
MF	GO:0048029	monosaccharide binding	12/448	82/17420	0.146341	5.69033	6.91664	1.17355e-06	7.42535e-05	5.85089e-05	Egln1/Egln3/Gpi/Hk2/Hk3/Khk/Lman1l/P3h2/P4ha2/Pygl/Slc2a3/Slc2a5	12	0.0267857
MF	GO:0046873	metal ion transmembrane transporter activity	30/448	442/17420	0.0678733	2.63918	5.67125	1.43115e-06	8.30069e-05	6.54062e-05	Abcc9/Atp7b/Cacna1h/Cacna1i/Gria2/Grin1/Grin2c/Kcna2/Kcna3/Kcna4/Kcna7/Kcnb2/Kcnc3/Kcnj16/Kcnj4/Kcnma1/Kcnmb1/Kcnn3/Kcnn4/Kcnt1/Mcoln3/Mfsd2a/Panx3/Scn7a/Slc11a1/Slc1a1/Slc1a2/Slc1a6/Slc41a1/Slc6a7	30	0.0669643
MF	GO:0005244	voltage-gated monoatomic ion channel activity	17/448	169/17420	0.100592	3.9114	6.17906	1.76439e-06	9.44625e-05	7.44328e-05	Ano1/Cacna1h/Cacna1i/Grin1/Grin2c/Kcna2/Kcna3/Kcna4/Kcna7/Kcnb2/Kcnc3/Kcnj16/Kcnj4/Kcnma1/Kcnn3/Kcnn4/Kcnt1	17	0.0379464
MF	GO:0022832	voltage-gated channel activity	17/448	171/17420	0.0994152	3.86565	6.1182	2.07675e-06	0.000103244	8.13524e-05	Ano1/Cacna1h/Cacna1i/Grin1/Grin2c/Kcna2/Kcna3/Kcna4/Kcna7/Kcnb2/Kcnc3/Kcnj16/Kcnj4/Kcnma1/Kcnn3/Kcnn4/Kcnt1	17	0.0379464
MF	GO:0015079	potassium ion transmembrane transporter activity	16/448	156/17420	0.102564	3.9881	6.09074	2.75043e-06	0.00012762	0.00010056	Abcc9/Gria2/Kcna2/Kcna3/Kcna4/Kcna7/Kcnb2/Kcnc3/Kcnj16/Kcnj4/Kcnma1/Kcnmb1/Kcnn3/Kcnn4/Kcnt1/Mcoln3	16	0.0357143
MF	GO:0022843	voltage-gated monoatomic cation channel activity	15/448	140/17420	0.107143	4.16614	6.11091	3.2658e-06	0.000142062	0.00011194	Cacna1h/Cacna1i/Grin1/Kcna2/Kcna3/Kcna4/Kcna7/Kcnb2/Kcnc3/Kcnj16/Kcnj4/Kcnma1/Kcnn3/Kcnn4/Kcnt1	15	0.0334821
MF	GO:0099094	ligand-gated monoatomic cation channel activity	14/448	124/17420	0.112903	4.39012	6.15513	3.73284e-06	0.000152827	0.000120422	Ano1/Chrna4/Gria2/Grin1/Grin2c/Kcnj16/Kcnj4/Kcnma1/Kcnmb1/Kcnn3/Kcnn4/Kcnt1/Mcoln3/P2rx6	14	0.03125
MF	GO:0005249	voltage-gated potassium channel activity	12/448	92/17420	0.130435	5.07182	6.36198	4.07512e-06	0.000157571	0.00012416	Kcna2/Kcna3/Kcna4/Kcna7/Kcnb2/Kcnc3/Kcnj16/Kcnj4/Kcnma1/Kcnn3/Kcnn4/Kcnt1	12	0.0267857
MF	GO:0015267	channel activity	30/448	488/17420	0.0614754	2.39041	5.06152	1.03177e-05	0.000359055	0.000282922	Abcc9/Ano1/Cacna1h/Cacna1i/Chrna4/Gabrp/Gria2/Grin1/Grin2c/Kcna2/Kcna3/Kcna4/Kcna7/Kcnb2/Kcnc3/Kcnj16/Kcnj4/Kcnma1/Kcnmb1/Kcnn3/Kcnn4/Kcnt1/Mcoln3/Otop1/P2rx6/Panx3/Scn7a/Slc1a1/Slc26a9/Tmc7	30	0.0669643
MF	GO:0022803	passive transmembrane transporter activity	30/448	488/17420	0.0614754	2.39041	5.06152	1.03177e-05	0.000359055	0.000282922	Abcc9/Ano1/Cacna1h/Cacna1i/Chrna4/Gabrp/Gria2/Grin1/Grin2c/Kcna2/Kcna3/Kcna4/Kcna7/Kcnb2/Kcnc3/Kcnj16/Kcnj4/Kcnma1/Kcnmb1/Kcnn3/Kcnn4/Kcnt1/Mcoln3/Otop1/P2rx6/Panx3/Scn7a/Slc1a1/Slc26a9/Tmc7	30	0.0669643
MF	GO:0005251	delayed rectifier potassium channel activity	6/448	24/17420	0.25	9.72098	6.94593	2.54016e-05	0.000841882	0.000663371	Kcna2/Kcna3/Kcna4/Kcna7/Kcnb2/Kcnc3	6	0.0133929
MF	GO:0015276	ligand-gated monoatomic ion channel activity	15/448	177/17420	0.0847458	3.29525	4.98648	5.47563e-05	0.00173229	0.00136498	Ano1/Chrna4/Gabrp/Gria2/Grin1/Grin2c/Kcnj16/Kcnj4/Kcnma1/Kcnmb1/Kcnn3/Kcnn4/Kcnt1/Mcoln3/P2rx6	15	0.0334821
MF	GO:0022834	ligand-gated channel activity	15/448	182/17420	0.0824176	3.20472	4.85769	7.52831e-05	0.00223802	0.00176348	Ano1/Chrna4/Gabrp/Gria2/Grin1/Grin2c/Kcnj16/Kcnj4/Kcnma1/Kcnmb1/Kcnn3/Kcnn4/Kcnt1/Mcoln3/P2rx6	15	0.0334821
MF	GO:0005539	glycosaminoglycan binding	17/448	226/17420	0.0752212	2.9249	4.73214	8.02199e-05	0.00223802	0.00176348	Adamts15/Ccl2/Ccl3/Ccl5/Ccl7/Cxcl10/Liph/Nod2/Nrtn/Pglyrp1/Pglyrp2/Pla2g5/Slit1/Tgfbr3/Thbs1/Tlr2/Vegfa	17	0.0379464
MF	GO:0022839	monoatomic ion-gated channel activity	6/448	29/17420	0.206897	8.04495	6.16877	8.03888e-05	0.00223802	0.00176348	Ano1/Kcnma1/Kcnmb1/Kcnn3/Kcnn4/Kcnt1	6	0.0133929
MF	GO:0030246	carbohydrate binding	19/448	272/17420	0.0698529	2.71616	4.63467	8.4192e-05	0.00225376	0.00177587	Cd69/Chi3l1/Clec2d2/Egln1/Egln3/Gbe1/Gpi/Hk2/Hk3/Khk/Lman1l/P3h2/P4ha2/Ppp1r3b/Ppp1r3c/Ppp1r3g/Pygl/Slc2a3/Slc2a5	19	0.0424107
MF	GO:0008083	growth factor activity	13/448	145/17420	0.0896552	3.48615	4.88411	9.62094e-05	0.00248006	0.00195419	Csf2/Csf3/Cxcl1/Fgf11/Fgf16/Gdf5/Gpi/Il12b/Il34/Il6/Jag2/Nrtn/Vegfa	13	0.0290179
MF	GO:0031406	carboxylic acid binding	15/448	189/17420	0.0793651	3.08603	4.68468	0.000115191	0.00286333	0.00225619	Egln1/Egln3/Fabp4/Ffar4/Grin1/Gsta1/Nod2/Nos2/Nrtn/P3h2/P4ha2/Pygl/Rbp1/Rbp2/Slc1a1	15	0.0334821
MF	GO:0015269	calcium-activated potassium channel activity	4/448	11/17420	0.363636	14.1396	7.08233	0.000123386	0.00296126	0.00233336	Kcnma1/Kcnmb1/Kcnn3/Kcnn4	4	0.00892857
MF	GO:0042277	peptide binding	17/448	240/17420	0.0708333	2.75428	4.44607	0.000166553	0.00386403	0.0030447	Adcyap1r1/Anpep/Bdkrb1/Enpep/Gria2/Grin1/Grpr/Gsap/Nfkbia/Ngfr/Npy1r/RT1-Bb/RT1-CE1/RT1-CE16/RT1-S3/Sstr2/Tlr2	17	0.0379464
MF	GO:0030594	neurotransmitter receptor activity	10/448	96/17420	0.104167	4.05041	4.86916	0.000179362	0.00394384	0.00310759	Chrna4/Gabrp/Gria2/Grin1/Grin2c/Grm1/Htr5b/Htr6/Kctd16/Tspo	10	0.0223214
MF	GO:0031543	peptidyl-proline dioxygenase activity	4/448	12/17420	0.333333	12.9613	6.73409	0.000181326	0.00394384	0.00310759	Egln1/Egln3/P3h2/P4ha2	4	0.00892857
MF	GO:0018455	alcohol dehydrogenase [NAD(P)+] activity	8/448	63/17420	0.126984	4.93764	5.0869	0.00020157	0.0042513	0.00334986	Adh1c/Adh6/Adh7/Akr1b10/Akr1b8/Akr1c15/Akr1c19/Aldh3a1	8	0.0178571
MF	GO:0043177	organic acid binding	15/448	202/17420	0.0742574	2.88742	4.38366	0.000239619	0.00490513	0.00386506	Egln1/Egln3/Fabp4/Ffar4/Grin1/Gsta1/Nod2/Nos2/Nrtn/P3h2/P4ha2/Pygl/Rbp1/Rbp2/Slc1a1	15	0.0334821
MF	GO:0048019	receptor antagonist activity	4/448	13/17420	0.307692	11.9643	6.42502	0.000256609	0.00510286	0.00402085	Adh7/Ccl5/Fst/Il1rn	4	0.00892857
MF	GO:0048020	CCR chemokine receptor binding	7/448	51/17420	0.137255	5.33701	5.03932	0.000309135	0.00597662	0.00470934	Ccl2/Ccl20/Ccl3/Ccl4/Ccl5/Ccl7/Cx3cl1	7	0.015625
MF	GO:0005536	D-glucose binding	4/448	14/17420	0.285714	11.1097	6.14804	0.000351981	0.00662105	0.00521713	Hk2/Hk3/Pygl/Slc2a3	4	0.00892857
MF	GO:0005227	calcium-activated cation channel activity	5/448	25/17420	0.2	7.77679	5.50891	0.000381905	0.0069949	0.00551171	Ano1/Kcnma1/Kcnmb1/Kcnn3/Kcnn4	5	0.0111607
MF	GO:0015643	toxic substance binding	4/448	15/17420	0.266667	10.369	5.89777	0.000470267	0.00839246	0.00661293	Ass1/Gucy2c/Nefh/RT1-Bb	4	0.00892857
MF	GO:0016918	retinal binding	4/448	16/17420	0.25	9.72098	5.67002	0.000614353	0.010429	0.00821766	Abca4/Akr1b10/Rbp1/Rbp2	4	0.00892857
MF	GO:0042834	peptidoglycan binding	4/448	16/17420	0.25	9.72098	5.67002	0.000614353	0.010429	0.00821766	Nod2/Pglyrp1/Pglyrp2/Tlr2	4	0.00892857
MF	GO:0030547	signaling receptor inhibitor activity	5/448	29/17420	0.172414	6.70413	4.99471	0.00078439	0.0129985	0.0102423	Adh7/Ccl5/Fst/Il1rn/Lypd6	5	0.0111607
MF	GO:0016705	oxidoreductase activity, acting on paired donors, with incorporation or reduction of molecular oxygen	15/448	229/17420	0.0655022	2.54698	3.82857	0.000895324	0.0144918	0.0114189	Akr1c15/Akr1c19/Cmah/Cyp19a1/Cyp1a1/Cyp2c11/Cyp4b1/Egln1/Egln3/Hmox1/Kdm3a/Nos2/P3h2/P4ha2/Ptgs2	15	0.0334821
MF	GO:0019842	vitamin binding	11/448	139/17420	0.0791367	3.07715	3.99461	0.000940193	0.0148721	0.0117187	Abca4/Adh7/Akr1b10/Egln1/Egln3/Etnppl/P3h2/P4ha2/Pygl/Rbp1/Rbp2	11	0.0245536
MF	GO:0031418	L-ascorbic acid binding	4/448	18/17420	0.222222	8.64087	5.26943	0.000991655	0.0153376	0.0120854	Egln1/Egln3/P3h2/P4ha2	4	0.00892857
MF	GO:0008201	heparin binding	12/448	164/17420	0.0731707	2.84517	3.85719	0.00111668	0.0168959	0.0133133	Adamts15/Ccl2/Ccl3/Ccl5/Ccl7/Cxcl10/Liph/Pla2g5/Slit1/Tgfbr3/Thbs1/Vegfa	12	0.0267857
MF	GO:0004032	aldose reductase (NADPH) activity	4/448	19/17420	0.210526	8.18609	5.09174	0.00123078	0.017979	0.0141667	Akr1b10/Akr1b8/Akr1c15/Akr1c19	4	0.00892857
MF	GO:0015081	sodium ion transmembrane transporter activity	12/448	166/17420	0.0722892	2.81089	3.80877	0.00123993	0.017979	0.0141667	Cacna1h/Cacna1i/Gria2/Grin1/Mcoln3/Mfsd2a/Scn7a/Slc1a1/Slc1a2/Slc1a6/Slc41a1/Slc6a7	12	0.0267857
MF	GO:0019955	cytokine binding	11/448	145/17420	0.0758621	2.94982	3.83047	0.00132788	0.0188613	0.014862	Cntfr/Crlf1/Cxcr4/Gdf5/Il12b/Il17f/Il1rn/Sostdc1/Tgfbr3/Thbs1/Tnfrsf14	11	0.0245536
MF	GO:0005272	sodium channel activity	6/448	49/17420	0.122449	4.7613	4.28359	0.00153414	0.0213552	0.0168271	Cacna1h/Cacna1i/Gria2/Grin1/Mcoln3/Scn7a	6	0.0133929
MF	GO:0005501	retinoid binding	5/448	34/17420	0.147059	5.71822	4.47407	0.00165401	0.0225724	0.0177862	Abca4/Adh7/Akr1b10/Rbp1/Rbp2	5	0.0111607
MF	GO:0019200	carbohydrate kinase activity	4/448	21/17420	0.190476	7.40646	4.77254	0.00182474	0.0244235	0.0192447	Hk2/Hk3/Khk/Pfkp	4	0.00892857
MF	GO:0001968	fibronectin binding	5/448	35/17420	0.142857	5.55485	4.38232	0.0018895	0.0248131	0.0195518	Mmp13/Mmp9/Plekha2/Thbs1/Vegfa	5	0.0111607
MF	GO:0001653	peptide receptor activity	10/448	130/17420	0.0769231	2.99107	3.70207	0.00195796	0.0252359	0.0198849	Adcyap1r1/Bdkrb1/Bdkrb2/Crhr2/Gipr/Grpr/Gucy2c/Npy1r/Rxfp3/Sstr2	10	0.0223214
MF	GO:0004383	guanylate cyclase activity	3/448	11/17420	0.272727	10.6047	5.17699	0.00239008	0.0286971	0.0226122	Gucy1a1/Gucy1b1/Gucy2c	3	0.00669643
MF	GO:0019841	retinol binding	3/448	11/17420	0.272727	10.6047	5.17699	0.00239008	0.0286971	0.0226122	Adh7/Rbp1/Rbp2	3	0.00669643
MF	GO:0022849	glutamate-gated calcium ion channel activity	3/448	11/17420	0.272727	10.6047	5.17699	0.00239008	0.0286971	0.0226122	Gria2/Grin1/Grin2c	3	0.00669643
MF	GO:0019840	isoprenoid binding	5/448	37/17420	0.135135	5.25458	4.20901	0.00243266	0.0286971	0.0226122	Abca4/Adh7/Akr1b10/Rbp1/Rbp2	5	0.0111607
MF	GO:0042056	chemoattractant activity	5/448	37/17420	0.135135	5.25458	4.20901	0.00243266	0.0286971	0.0226122	Ccl3/Ccl5/Cx3cl1/Cxcl10/Vegfa	5	0.0111607
MF	GO:0016298	lipase activity	9/448	113/17420	0.079646	3.09695	3.63329	0.00256269	0.0297272	0.0234239	Abhd15/Ccl5/Faah/Hmox1/Liph/Pla2g2a/Pla2g5/Pla2g7/Pld6	9	0.0200893
MF	GO:0005283	amino acid:sodium symporter activity	4/448	24/17420	0.166667	6.48065	4.36513	0.00304844	0.0347822	0.027407	Slc1a1/Slc1a2/Slc1a6/Slc6a7	4	0.00892857
MF	GO:0046943	carboxylic acid transmembrane transporter activity	12/448	186/17420	0.0645161	2.50864	3.36073	0.00321337	0.0360726	0.0284238	Fabp4/Gria2/Grin1/Grin2c/Mfsd2a/Slc16a3/Slc1a1/Slc1a2/Slc1a6/Slc26a9/Slc2a1/Slc6a7	12	0.0267857
MF	GO:0005342	organic acid transmembrane transporter activity	12/448	187/17420	0.0641711	2.49523	3.33988	0.00335621	0.0370781	0.0292161	Fabp4/Gria2/Grin1/Grin2c/Mfsd2a/Slc16a3/Slc1a1/Slc1a2/Slc1a6/Slc26a9/Slc2a1/Slc6a7	12	0.0267857
MF	GO:0008106	alcohol dehydrogenase (NADP+) activity	5/448	40/17420	0.125	4.86049	3.97129	0.00344815	0.0374987	0.0295475	Akr1b10/Akr1b8/Akr1c15/Akr1c19/Aldh3a1	5	0.0111607
MF	GO:0004709	MAP kinase kinase kinase activity	4/448	25/17420	0.16	6.22143	4.24455	0.00355635	0.0375033	0.0295512	Map3k21/Map3k8/Map3k9/Mos	4	0.00892857
MF	GO:0005242	inward rectifier potassium channel activity	4/448	25/17420	0.16	6.22143	4.24455	0.00355635	0.0375033	0.0295512	Kcnj16/Kcnj4/Kcnn3/Kcnn4	4	0.00892857
MF	GO:0043121	neurotrophin binding	3/448	13/17420	0.230769	8.97321	4.67226	0.00398726	0.0414198	0.0326372	Hap1/Ngfr/Ntrk1	3	0.00669643
MF	GO:0008528	G protein-coupled peptide receptor activity	9/448	121/17420	0.0743802	2.89219	3.39337	0.00405483	0.0414494	0.0326605	Adcyap1r1/Bdkrb1/Bdkrb2/Crhr2/Gipr/Grpr/Npy1r/Rxfp3/Sstr2	9	0.0200893
MF	GO:0008066	glutamate receptor activity	4/448	26/17420	0.153846	5.98214	4.13035	0.00411879	0.0414494	0.0326605	Gria2/Grin1/Grin2c/Grm1	4	0.00892857
MF	GO:0005506	iron ion binding	13/448	217/17420	0.0599078	2.32945	3.20173	0.00416876	0.0414494	0.0326605	Acp5/Aox1/Cyp19a1/Cyp1a1/Cyp2c11/Cyp4b1/Egln1/Egln3/Fth1/Kdm3a/Lcn2/P3h2/P4ha2	13	0.0290179
MF	GO:0031681	G-protein beta-subunit binding	4/448	27/17420	0.148148	5.76058	4.02197	0.00473836	0.0464493	0.0366002	Gng2/Rasd1/Rasd2/Rgs11	4	0.00892857
MF	GO:0052689	carboxylic ester hydrolase activity	12/448	196/17420	0.0612245	2.38065	3.15812	0.00488665	0.0472376	0.0372214	Abhd15/Acot1/Ccl5/Ces1a/Faah/Hmox1/Liph/Ndst3/Pla2g2a/Pla2g5/Pla2g7/Pld6	12	0.0267857
MF	GO:1901681	sulfur compound binding	15/448	275/17420	0.0545455	2.12094	3.04414	0.00520823	0.0492265	0.0387886	Adamts15/Ccl2/Ccl3/Ccl5/Ccl7/Cxcl10/Fst/Gsta1/Liph/Nrtn/Pla2g5/Slit1/Tgfbr3/Thbs1/Vegfa	15	0.0334821
MF	GO:0004033	aldo-keto reductase (NADPH) activity	5/448	44/17420	0.113636	4.41863	3.68882	0.00523385	0.0492265	0.0387886	Akr1b10/Akr1b8/Akr1c15/Akr1c19/Aldh3a1	5	0.0111607
MF	GO:0070851	growth factor receptor binding	10/448	150/17420	0.0666667	2.59226	3.18198	0.00547601	0.0508174	0.0400421	Csf2/Csf3/Fgf16/Il1a/Il1b/Il1rn/Il6/Nrtn/Vav3/Vegfa	10	0.0223214
MF	GO:0033293	monocarboxylic acid binding	7/448	84/17420	0.0833333	3.24033	3.34396	0.0058665	0.0535824	0.0422209	Fabp4/Ffar4/Gsta1/Nod2/Pygl/Rbp1/Rbp2	7	0.015625
MF	GO:0016829	lyase activity	12/448	201/17420	0.0597015	2.32143	3.06141	0.00595148	0.0535824	0.0422209	Aldoc/Car12/Car3/Car9/Cyp1a1/Eno2/Etnppl/Gucy1a1/Gucy1b1/Gucy2c/Hal/Rsad2	12	0.0267857
MF	GO:0005313	L-glutamate transmembrane transporter activity	3/448	15/17420	0.2	7.77679	4.26596	0.0061058	0.0535824	0.0422209	Slc1a1/Slc1a2/Slc1a6	3	0.00669643
MF	GO:0016722	oxidoreductase activity, acting on metal ions	3/448	15/17420	0.2	7.77679	4.26596	0.0061058	0.0535824	0.0422209	Fth1/Hephl1/Steap4	3	0.00669643
MF	GO:0005416	amino acid:monoatomic cation symporter activity	4/448	29/17420	0.137931	5.3633	3.82064	0.0061589	0.0535824	0.0422209	Slc1a1/Slc1a2/Slc1a6/Slc6a7	4	0.00892857
MF	GO:0099604	ligand-gated calcium channel activity	4/448	30/17420	0.133333	5.18452	3.72684	0.00696463	0.0598443	0.047155	Gria2/Grin1/Grin2c/Mcoln3	4	0.00892857
MF	GO:0004970	glutamate-gated receptor activity	3/448	16/17420	0.1875	7.29074	4.08998	0.00737306	0.0618271	0.0487173	Gria2/Grin1/Grin2c	3	0.00669643
MF	GO:0005149	interleukin-1 receptor binding	3/448	16/17420	0.1875	7.29074	4.08998	0.00737306	0.0618271	0.0487173	Il1a/Il1b/Il1rn	3	0.00669643
MF	GO:0020037	heme binding	11/448	182/17420	0.0604396	2.35013	2.97475	0.00757206	0.0627399	0.0494366	Cyp19a1/Cyp1a1/Cyp2c11/Cyp4b1/Gucy1a1/Gucy1b1/Hmox1/Nos2/Ptgs2/Stc2/Steap4	11	0.0245536
MF	GO:0005525	GTP binding	18/448	371/17420	0.0485175	1.88655	2.80431	0.00777665	0.0634253	0.0499767	Adss1/Ak4/Dapk1/Gbp7/Gch1/Gnaz/Gucy1a1/Gucy1b1/Gucy2c/Hcar2/Rab26/Rasd1/Rasd2/Rasl12/Rragd/Septin4/Tgm2/Tuba8	18	0.0401786
MF	GO:0042923	neuropeptide binding	4/448	31/17420	0.129032	5.01728	3.63714	0.00783704	0.0634253	0.0499767	Adcyap1r1/Grpr/Npy1r/Sstr2	4	0.00892857
MF	GO:0005516	calmodulin binding	11/448	184/17420	0.0597826	2.32458	2.93463	0.00819007	0.0655205	0.0516276	Adora2a/Camk1g/Cnn1/Dapk1/Grin1/Kcnn3/Kcnn4/Myh3/Ngfr/Nos2/Pde1c	11	0.0245536
MF	GO:0004620	phospholipase activity	7/448	90/17420	0.0777778	3.02431	3.12811	0.00849383	0.0671785	0.0529341	Ccl5/Hmox1/Liph/Pla2g2a/Pla2g5/Pla2g7/Pld6	7	0.015625
MF	GO:0008198	ferrous iron binding	4/448	32/17420	0.125	4.86049	3.55121	0.00877826	0.0686479	0.0540919	Acp5/Egln1/Egln3/Fth1	4	0.00892857
MF	GO:0050839	cell adhesion molecule binding	15/448	293/17420	0.0511945	1.99064	2.7784	0.00912365	0.0693686	0.0546598	Cdh18/Cdh6/Clstn3/Cx3cl1/Frmd5/Il1b/Itga10/Itga8/Ndrg1/Nos2/Nrxn2/Prom1/Ptprz1/Syk/Thbs1	15	0.0334821
MF	GO:0005230	extracellular ligand-gated monoatomic ion channel activity	6/448	70/17420	0.0857143	3.33291	3.17747	0.00916941	0.0693686	0.0546598	Chrna4/Gabrp/Gria2/Grin1/Grin2c/P2rx6	6	0.0133929
MF	GO:0098960	postsynaptic neurotransmitter receptor activity	6/448	70/17420	0.0857143	3.33291	3.17747	0.00916941	0.0693686	0.0546598	Chrna4/Gria2/Grin1/Grin2c/Grm1/Kctd16	6	0.0133929
MF	GO:0051879	Hsp90 protein binding	5/448	51/17420	0.0980392	3.81215	3.26753	0.00978339	0.0732176	0.0576927	Cyp1a1/Gucy1b1/Mapt/Nod2/Nos2	5	0.0111607
MF	GO:0016616	oxidoreductase activity, acting on the CH-OH group of donors, NAD or NADP as acceptor	9/448	140/17420	0.0642857	2.49968	2.89451	0.0102956	0.0749857	0.0590858	Adh1c/Adh6/Adh7/Akr1b10/Akr1b8/Akr1c15/Akr1c19/Aldh3a1/Hsd11b1	9	0.0200893
MF	GO:0004089	carbonate dehydratase activity	3/448	18/17420	0.166667	6.48065	3.77966	0.0103429	0.0749857	0.0590858	Car12/Car3/Car9	3	0.00669643
MF	GO:0005324	long-chain fatty acid transmembrane transporter activity	3/448	18/17420	0.166667	6.48065	3.77966	0.0103429	0.0749857	0.0590858	Fabp4/Mfsd2a/Slc2a1	3	0.00669643
MF	GO:0005544	calcium-dependent phospholipid binding	5/448	52/17420	0.0961538	3.73884	3.21349	0.0106014	0.0757514	0.0596892	Cpne5/Doc2a/Syt15/Syt17/Sytl3	5	0.0111607
MF	GO:0046906	tetrapyrrole binding	11/448	191/17420	0.0575916	2.23939	2.7982	0.0106661	0.0757514	0.0596892	Cyp19a1/Cyp1a1/Cyp2c11/Cyp4b1/Gucy1a1/Gucy1b1/Hmox1/Nos2/Ptgs2/Stc2/Steap4	11	0.0245536
MF	GO:0005343	organic acid:sodium symporter activity	4/448	35/17420	0.114286	4.44388	3.31344	0.0120346	0.083047	0.0654379	Slc1a1/Slc1a2/Slc1a6/Slc6a7	4	0.00892857
MF	GO:0001614	purinergic nucleotide receptor activity	3/448	19/17420	0.157895	6.13957	3.64167	0.0120514	0.083047	0.0654379	Hcar2/P2rx6/P2ry6	3	0.00669643
MF	GO:0016502	nucleotide receptor activity	3/448	19/17420	0.157895	6.13957	3.64167	0.0120514	0.083047	0.0654379	Hcar2/P2rx6/P2ry6	3	0.00669643
MF	GO:0005504	fatty acid binding	5/448	54/17420	0.0925926	3.60036	3.10932	0.0123754	0.0844436	0.0665383	Fabp4/Ffar4/Gsta1/Rbp1/Rbp2	5	0.0111607
MF	GO:0042562	hormone binding	7/448	98/17420	0.0714286	2.77742	2.86674	0.013225	0.0893653	0.0704164	Adcyap1r1/Adrb3/Crhr2/Gipr/Hk3/Sult2b1/Tspo	7	0.015625
MF	GO:0004675	transmembrane receptor protein serine/threonine kinase activity	3/448	20/17420	0.15	5.83259	3.51321	0.013912	0.0910938	0.0717784	Ntrk1/Sostdc1/Tgfbr3	3	0.00669643
MF	GO:0004745	all-trans-retinol dehydrogenase (NAD+) activity	3/448	20/17420	0.15	5.83259	3.51321	0.013912	0.0910938	0.0717784	Adh1c/Adh6/Adh7	3	0.00669643
MF	GO:0015172	acidic amino acid transmembrane transporter activity	3/448	20/17420	0.15	5.83259	3.51321	0.013912	0.0910938	0.0717784	Slc1a1/Slc1a2/Slc1a6	3	0.00669643
MF	GO:0019001	guanyl nucleotide binding	18/448	395/17420	0.0455696	1.77193	2.52124	0.0141353	0.0910938	0.0717784	Adss1/Ak4/Dapk1/Gbp7/Gch1/Gnaz/Gucy1a1/Gucy1b1/Gucy2c/Hcar2/Rab26/Rasd1/Rasd2/Rasl12/Rragd/Septin4/Tgm2/Tuba8	18	0.0401786
MF	GO:0032561	guanyl ribonucleotide binding	18/448	395/17420	0.0455696	1.77193	2.52124	0.0141353	0.0910938	0.0717784	Adss1/Ak4/Dapk1/Gbp7/Gch1/Gnaz/Gucy1a1/Gucy1b1/Gucy2c/Hcar2/Rab26/Rasd1/Rasd2/Rasl12/Rragd/Septin4/Tgm2/Tuba8	18	0.0401786
MF	GO:0099529	neurotransmitter receptor activity involved in regulation of postsynaptic membrane potential	5/448	57/17420	0.0877193	3.41087	2.96199	0.0153968	0.0983136	0.0774673	Chrna4/Gria2/Grin1/Grin2c/Kctd16	5	0.0111607
MF	GO:0016614	oxidoreductase activity, acting on CH-OH group of donors	9/448	150/17420	0.06	2.33304	2.66395	0.0156258	0.0984074	0.0775412	Adh1c/Adh6/Adh7/Akr1b10/Akr1b8/Akr1c15/Akr1c19/Aldh3a1/Hsd11b1	9	0.0200893
MF	GO:0015245	fatty acid transmembrane transporter activity	3/448	21/17420	0.142857	5.55485	3.39317	0.0159266	0.0984074	0.0775412	Fabp4/Mfsd2a/Slc2a1	3	0.00669643
MF	GO:0036122	BMP binding	3/448	21/17420	0.142857	5.55485	3.39317	0.0159266	0.0984074	0.0775412	Gdf5/Sostdc1/Tgfbr3	3	0.00669643
MF	GO:0016229	steroid dehydrogenase activity	4/448	38/17420	0.105263	4.09305	3.10108	0.0159771	0.0984074	0.0775412	Akr1b8/Akr1c15/Akr1c19/Hsd11b1	4	0.00892857
MF	GO:0015171	amino acid transmembrane transporter activity	7/448	102/17420	0.0686275	2.6685	2.74576	0.0161923	0.0988581	0.0778963	Gria2/Grin1/Grin2c/Slc1a1/Slc1a2/Slc1a6/Slc6a7	7	0.015625
MF	GO:0004497	monooxygenase activity	9/448	152/17420	0.0592105	2.30234	2.62004	0.0168979	0.102269	0.080584	Akr1c15/Akr1c19/Cmah/Cyp19a1/Cyp1a1/Cyp2c11/Cyp4b1/Hmox1/Nos2	9	0.0200893
MF	GO:0070330	aromatase activity	4/448	39/17420	0.102564	3.9881	3.0351	0.0174509	0.104705	0.0825038	Cyp19a1/Cyp1a1/Cyp2c11/Cyp4b1	4	0.00892857
MF	GO:0016706	2-oxoglutarate-dependent dioxygenase activity	5/448	60/17420	0.0833333	3.24033	2.82421	0.0188748	0.110239	0.0868642	Egln1/Egln3/Kdm3a/P3h2/P4ha2	5	0.0111607
MF	GO:0022824	transmitter-gated monoatomic ion channel activity	5/448	60/17420	0.0833333	3.24033	2.82421	0.0188748	0.110239	0.0868642	Chrna4/Gabrp/Gria2/Grin1/Grin2c	5	0.0111607
MF	GO:0022835	transmitter-gated channel activity	5/448	60/17420	0.0833333	3.24033	2.82421	0.0188748	0.110239	0.0868642	Chrna4/Gabrp/Gria2/Grin1/Grin2c	5	0.0111607
MF	GO:0043548	phosphatidylinositol 3-kinase binding	4/448	40/17420	0.1	3.88839	2.97129	0.0190067	0.110239	0.0868642	Coro1a/Dab1/Insrr/Rasd2	4	0.00892857
MF	GO:0016835	carbon-oxygen lyase activity	6/448	83/17420	0.0722892	2.81089	2.68675	0.0200291	0.115208	0.0907798	Car12/Car3/Car9/Cyp1a1/Eno2/Etnppl	6	0.0133929
MF	GO:0042605	peptide antigen binding	4/448	41/17420	0.097561	3.79355	2.90952	0.0206458	0.117783	0.0928081	RT1-Bb/RT1-CE1/RT1-CE16/RT1-S3	4	0.00892857
MF	GO:0043178	alcohol binding	6/448	84/17420	0.0714286	2.77742	2.65302	0.0211185	0.1195	0.0941611	Adh7/Prom1/Rbp1/Rbp2/Sult2b1/Tspo	6	0.0133929
MF	GO:0016709	oxidoreductase activity, acting on paired donors, with incorporation or reduction of molecular oxygen, NAD(P)H as one donor, and incorporation of one atom of oxygen	4/448	42/17420	0.0952381	3.70323	2.84965	0.022369	0.12552	0.0989048	Akr1c15/Akr1c19/Cyp1a1/Nos2	4	0.00892857
MF	GO:0004022	alcohol dehydrogenase (NAD+) activity	3/448	24/17420	0.125	4.86049	3.07473	0.0229038	0.12552	0.0989048	Adh1c/Adh6/Adh7	3	0.00669643
MF	GO:0009975	cyclase activity	3/448	24/17420	0.125	4.86049	3.07473	0.0229038	0.12552	0.0989048	Gucy1a1/Gucy1b1/Gucy2c	3	0.00669643
MF	GO:0099507	ligand-gated monoatomic ion channel activity involved in regulation of presynaptic membrane potential	3/448	24/17420	0.125	4.86049	3.07473	0.0229038	0.12552	0.0989048	Gria2/Grin1/Kcnma1	3	0.00669643
MF	GO:0008514	organic anion transmembrane transporter activity	13/448	271/17420	0.0479705	1.86528	2.33242	0.0235704	0.128164	0.100989	Fabp4/Gria2/Grin1/Grin2c/Mfsd2a/Slc16a3/Slc1a1/Slc1a2/Slc1a6/Slc26a9/Slc2a1/Slc2a3/Slc6a7	13	0.0290179
MF	GO:0001540	amyloid-beta binding	5/448	64/17420	0.078125	3.03781	2.65346	0.0242633	0.12891	0.101576	Gria2/Grin1/Gsap/Ngfr/Tlr2	5	0.0111607
MF	GO:0016836	hydro-lyase activity	5/448	64/17420	0.078125	3.03781	2.65346	0.0242633	0.12891	0.101576	Car12/Car3/Car9/Cyp1a1/Eno2	5	0.0111607
MF	GO:0045296	cadherin binding	5/448	64/17420	0.078125	3.03781	2.65346	0.0242633	0.12891	0.101576	Cdh18/Cdh6/Ndrg1/Nos2/Prom1	5	0.0111607
MF	GO:0005112	Notch binding	3/448	25/17420	0.12	4.66607	2.98018	0.025542	0.132565	0.104456	Dtx1/Jag2/Notch4	3	0.00669643
MF	GO:0005248	voltage-gated sodium channel activity	3/448	25/17420	0.12	4.66607	2.98018	0.025542	0.132565	0.104456	Cacna1h/Cacna1i/Scn7a	3	0.00669643
MF	GO:0030247	polysaccharide binding	3/448	25/17420	0.12	4.66607	2.98018	0.025542	0.132565	0.104456	Ppp1r3b/Ppp1r3c/Ppp1r3g	3	0.00669643
MF	GO:0000099	sulfur amino acid transmembrane transporter activity	2/448	10/17420	0.2	7.77679	3.48264	0.0259035	0.132565	0.104456	Slc1a1/Slc1a2	2	0.00446429
MF	GO:0010854	adenylate cyclase regulator activity	2/448	10/17420	0.2	7.77679	3.48264	0.0259035	0.132565	0.104456	Adgrv1/Gnaz	2	0.00446429
MF	GO:0005507	copper ion binding	5/448	66/17420	0.0757576	2.94575	2.57302	0.027293	0.138656	0.109256	Atp7b/Hephl1/Il1a/Mt1/Sncb	5	0.0111607
MF	GO:0015175	neutral L-amino acid transmembrane transporter activity	4/448	45/17420	0.0888889	3.45635	2.68051	0.0280528	0.138888	0.109439	Slc1a1/Slc1a2/Slc1a6/Slc6a7	4	0.00892857
MF	GO:0015149	hexose transmembrane transporter activity	3/448	26/17420	0.115385	4.48661	2.89051	0.0283364	0.138888	0.109439	Slc2a1/Slc2a3/Slc2a5	3	0.00669643
MF	GO:0015271	outward rectifier potassium channel activity	3/448	26/17420	0.115385	4.48661	2.89051	0.0283364	0.138888	0.109439	Kcna2/Kcna3/Kcnt1	3	0.00669643
MF	GO:0017134	fibroblast growth factor binding	3/448	26/17420	0.115385	4.48661	2.89051	0.0283364	0.138888	0.109439	Ptprz1/Tgfbr3/Thbs1	3	0.00669643
MF	GO:0055056	D-glucose transmembrane transporter activity	3/448	26/17420	0.115385	4.48661	2.89051	0.0283364	0.138888	0.109439	Slc2a1/Slc2a3/Slc2a5	3	0.00669643
MF	GO:0003823	antigen binding	5/448	67/17420	0.0746269	2.90179	2.53394	0.028894	0.140631	0.110812	Cd40/RT1-Bb/RT1-CE1/RT1-CE16/RT1-S3	5	0.0111607
MF	GO:0035325	Toll-like receptor binding	2/448	11/17420	0.181818	7.06981	3.27166	0.0311287	0.14718	0.115972	Syk/Tlr2	2	0.00446429
MF	GO:0047086	ketosteroid monooxygenase activity	2/448	11/17420	0.181818	7.06981	3.27166	0.0311287	0.14718	0.115972	Akr1c15/Akr1c19	2	0.00446429
MF	GO:0048185	activin binding	2/448	11/17420	0.181818	7.06981	3.27166	0.0311287	0.14718	0.115972	Fst/Tgfbr3	2	0.00446429
MF	GO:0016849	phosphorus-oxygen lyase activity	3/448	27/17420	0.111111	4.32044	2.80527	0.0312861	0.14718	0.115972	Gucy1a1/Gucy1b1/Gucy2c	3	0.00669643
MF	GO:0051213	dioxygenase activity	6/448	92/17420	0.0652174	2.53591	2.39977	0.031297	0.14718	0.115972	Egln1/Egln3/Kdm3a/P3h2/P4ha2/Ptgs2	6	0.0133929
MF	GO:0019838	growth factor binding	8/448	144/17420	0.0555556	2.16022	2.27135	0.0327887	0.153161	0.120685	Hap1/Il1rn/Ngfr/Ntrk1/Ptprz1/Tgfbr3/Thbs1/Vegfa	8	0.0178571
MF	GO:0016712	oxidoreductase activity, acting on paired donors, with incorporation or reduction of molecular oxygen, reduced flavin or flavoprotein as one donor, and incorporation of one atom of oxygen	5/448	70/17420	0.0714286	2.77742	2.42089	0.0340482	0.157983	0.124485	Cyp19a1/Cyp1a1/Cyp2c11/Cyp4b1/Hmox1	5	0.0111607
MF	GO:0015145	monosaccharide transmembrane transporter activity	3/448	28/17420	0.107143	4.16614	2.72407	0.0343904	0.158515	0.124903	Slc2a1/Slc2a3/Slc2a5	3	0.00669643
MF	GO:0004016	adenylate cyclase activity	2/448	12/17420	0.166667	6.48065	3.08555	0.0367292	0.165997	0.130799	Gucy1a1/Gucy1b1	2	0.00446429
MF	GO:0004706	JUN kinase kinase kinase activity	2/448	12/17420	0.166667	6.48065	3.08555	0.0367292	0.165997	0.130799	Map3k21/Map3k9	2	0.00446429
MF	GO:0140333	glycerophospholipid flippase activity	2/448	12/17420	0.166667	6.48065	3.08555	0.0367292	0.165997	0.130799	Abca4/Mfsd2a	2	0.00446429
MF	GO:0008157	protein phosphatase 1 binding	3/448	29/17420	0.103448	4.02248	2.64657	0.0376478	0.169051	0.133206	Ppp1r3b/Ppp1r3c/Ppp1r3g	3	0.00669643
MF	GO:0022853	active monoatomic ion transmembrane transporter activity	12/448	262/17420	0.0458015	1.78094	2.06929	0.0390523	0.174234	0.137289	Abcc9/Atp7b/Cox4i2/Mfsd2a/Slc11a1/Slc16a3/Slc1a1/Slc1a2/Slc1a6/Slc26a9/Slc41a1/Slc6a7	12	0.0267857
MF	GO:0030165	PDZ domain binding	7/448	123/17420	0.0569106	2.21291	2.1932	0.0396823	0.175049	0.137932	Ccdc88c/Gria2/Grin2c/Kcnj4/Plekha2/Sstr2/Tgfbr3	7	0.015625
MF	GO:0016811	hydrolase activity, acting on carbon-nitrogen (but not peptide) bonds, in linear amides	5/448	73/17420	0.0684932	2.66328	2.31366	0.0397382	0.175049	0.137932	Faah/Ndst3/Pglyrp1/Pglyrp2/Tgm2	5	0.0111607
MF	GO:0005178	integrin binding	8/448	150/17420	0.0533333	2.07381	2.14591	0.0402332	0.176115	0.138772	Cx3cl1/Frmd5/Il1b/Itga10/Itga8/Ptprz1/Syk/Thbs1	8	0.0178571
MF	GO:0005310	dicarboxylic acid transmembrane transporter activity	3/448	30/17420	0.1	3.88839	2.57248	0.0410571	0.177489	0.139854	Slc1a1/Slc1a6/Slc26a9	3	0.00669643
MF	GO:0051119	sugar transmembrane transporter activity	3/448	30/17420	0.1	3.88839	2.57248	0.0410571	0.177489	0.139854	Slc2a1/Slc2a3/Slc2a5	3	0.00669643
MF	GO:0140313	molecular sequestering activity	4/448	51/17420	0.0784314	3.04972	2.38164	0.0417851	0.179521	0.141456	Cd69/Fth1/Lcn2/Nfkbia	4	0.00892857
MF	GO:0042043	neurexin family protein binding	2/448	13/17420	0.153846	5.98214	2.91951	0.0426823	0.182251	0.143606	Clstn3/Sytl3	2	0.00446429
MF	GO:0042578	phosphoric ester hydrolase activity	15/448	357/17420	0.0420168	1.63378	1.96575	0.0436769	0.184899	0.145694	Acp5/Car3/Ccl5/Dusp4/Gdpd2/Hmox1/Pde1c/Phospho1/Pld6/Ppp1r3b/Ppp1r3c/Ptpre/Ptprr/Ptprz1/Styxl2	15	0.0334821
MF	GO:0019199	transmembrane receptor protein kinase activity	5/448	75/17420	0.0666667	2.59226	2.24513	0.0438339	0.184899	0.145694	Insrr/Ntrk1/Ret/Sostdc1/Tgfbr3	5	0.0111607
MF	GO:0038187	pattern recognition receptor activity	4/448	52/17420	0.0769231	2.99107	2.33613	0.0443838	0.186091	0.146633	Nod2/Pglyrp1/Pglyrp2/Tlr2	4	0.00892857
MF	GO:0017022	myosin binding	5/448	76/17420	0.0657895	2.55815	2.2117	0.0459732	0.191601	0.150974	Adgrv1/Coro1a/Cxcr4/Hap1/Stxbp5l	5	0.0111607
MF	GO:1904315	transmitter-gated monoatomic ion channel activity involved in regulation of postsynaptic membrane potential	4/448	53/17420	0.0754717	2.93464	2.29171	0.047071	0.195009	0.153659	Chrna4/Gria2/Grin1/Grin2c	4	0.00892857
MF	GO:0015035	protein-disulfide reductase activity	3/448	32/17420	0.09375	3.64537	2.43344	0.0483238	0.195442	0.154001	Ero1a/Pdia2/Pgk1	3	0.00669643
MF	GO:0004993	G protein-coupled serotonin receptor activity	2/448	14/17420	0.142857	5.55485	2.76995	0.0489662	0.195442	0.154001	Htr5b/Htr6	2	0.00446429
MF	GO:0015556	C4-dicarboxylate transmembrane transporter activity	2/448	14/17420	0.142857	5.55485	2.76995	0.0489662	0.195442	0.154001	Slc1a1/Slc1a6	2	0.00446429
MF	GO:0016595	glutamate binding	2/448	14/17420	0.142857	5.55485	2.76995	0.0489662	0.195442	0.154001	Grin1/Slc1a1	2	0.00446429
MF	GO:0023026	MHC class II protein complex binding	2/448	14/17420	0.142857	5.55485	2.76995	0.0489662	0.195442	0.154001	RT1-Bb/RT1-DMb	2	0.00446429
MF	GO:0099528	G protein-coupled neurotransmitter receptor activity	2/448	14/17420	0.142857	5.55485	2.76995	0.0489662	0.195442	0.154001	Grm1/Kctd16	2	0.00446429
MF	GO:0005262	calcium channel activity	7/448	129/17420	0.0542636	2.10998	2.05582	0.0491414	0.195442	0.154001	Cacna1h/Cacna1i/Gria2/Grin1/Grin2c/Mcoln3/Panx3	7	0.015625

## Sheet: KEGG Model vs Control
category	subcategory	ID	Description	GeneRatio	BgRatio	RichFactor	FoldEnrichment	zScore	pvalue	p.adjust	qvalue	geneID	Count	GeneRatioDecimal	GeneListSymbols
Organismal Systems	Immune system	rno04657	IL-17 signaling pathway	22/309	91/11023	0.241758	8.62428	12.4023	4.10975e-15	1.15484e-12	8.43579e-13	24770/29538/287561/116630/25610/81503/245920/114105/171551/60665/25445/301291/24494/24498/170496/171052/171045/81687/25493/29527/24835/683206	22	0.0711974	Ccl2/Ccl20/Ccl7/Csf2/Csf3/Cxcl1/Cxcl10/Cxcl2/Cxcl3/Cxcl6/Fosl1/Il17f/Il1b/Il6/Lcn2/Mmp13/Mmp3/Mmp9/Nfkbia/Ptgs2/Tnf/Tnfaip3
Environmental Information Processing	Signal transduction	rno04668	TNF signaling pathway	23/309	119/11023	0.193277	6.89481	10.9795	1.67851e-13	1.98335e-11	1.44878e-11	680611/78971/24770/29538/81780/116630/89808/81503/245920/114105/171551/60665/24494/24498/116596/171045/81687/25493/291912/29527/303690/24835/683206	23	0.0744337	Bcl3/Birc3/Ccl2/Ccl20/Ccl5/Csf2/Cx3cl1/Cxcl1/Cxcl10/Cxcl2/Cxcl3/Cxcl6/Il1b/Il6/Map3k8/Mmp3/Mmp9/Nfkbia/Nod2/Ptgs2/Rhbdf2/Tnf/Tnfaip3
Human Diseases	Immune disease	rno05323	Rheumatoid arthritis	20/309	87/11023	0.229885	8.20072	11.4509	2.11745e-13	1.98335e-11	1.44878e-11	25732/24770/29538/25542/81780/25660/116630/81503/114105/171551/60665/24493/24494/24498/171045/309622/294273/310553/24835/83785	20	0.0647249	Acp5/Ccl2/Ccl20/Ccl3/Ccl5/Cd28/Csf2/Cxcl1/Cxcl2/Cxcl3/Cxcl6/Il1a/Il1b/Il6/Mmp3/RT1-Bb/RT1-DMb/Tlr2/Tnf/Vegfa
Environmental Information Processing	Signaling molecules and interaction	rno04060	Cytokine-cytokine receptor interaction	33/309	274/11023	0.120438	4.2964	9.3835	1.13759e-12	7.99159e-11	5.83765e-11	24770/29538/25542/116637/81780/287561/171369/313173/116630/25610/89808/81503/245920/306748/497942/114105/171551/60665/60628/24336/252835/64546/301291/24493/24494/60582/498951/24498/24596/24835/366518/500590/252878	33	0.106796	Ccl2/Ccl20/Ccl3/Ccl4/Ccl5/Ccl7/Cd40/Cntfr/Csf2/Csf3/Cx3cl1/Cxcl1/Cxcl10/Cxcl14/Cxcl16/Cxcl2/Cxcl3/Cxcl6/Cxcr4/Epor/Gdf5/Il12b/Il17f/Il1a/Il1b/Il1rn/Il34/Il6/Ngfr/Tnf/Tnfrsf14/Tnfrsf9/Tnfsf15
Environmental Information Processing	Signaling molecules and interaction	rno04061	Viral protein interaction with cytokine and cytokine receptor	18/309	84/11023	0.214286	7.64424	10.3808	1.24565e-11	7.00053e-10	5.11371e-10	24770/29538/25542/116637/81780/287561/89808/81503/245920/306748/114105/171551/60665/60628/498951/24498/24835/366518	18	0.0582524	Ccl2/Ccl20/Ccl3/Ccl4/Ccl5/Ccl7/Cx3cl1/Cxcl1/Cxcl10/Cxcl14/Cxcl2/Cxcl3/Cxcl6/Cxcr4/Il34/Il6/Tnf/Tnfrsf14
Human Diseases	Immune disease	rno05332	Graft-versus-host disease	13/309	61/11023	0.213115	7.60247	8.78133	1.00571e-08	4.71009e-07	3.4406e-07	25660/24493/24494/24498/309622/309603/414791/414789/414819/414779/294273/294228/24835	13	0.0420712	Cd28/Il1a/Il1b/Il6/RT1-Bb/RT1-CE1/RT1-CE11/RT1-CE15/RT1-CE16/RT1-CE2/RT1-DMb/RT1-S3/Tnf
Human Diseases	Endocrine and metabolic disease	rno04940	Type I diabetes mellitus	13/309	70/11023	0.185714	6.62501	8.01751	5.79468e-08	2.32615e-06	1.69919e-06	25660/64546/24493/24494/309622/309603/414791/414789/414819/414779/294273/294228/24835	13	0.0420712	Cd28/Il12b/Il1a/Il1b/RT1-Bb/RT1-CE1/RT1-CE11/RT1-CE15/RT1-CE16/RT1-CE2/RT1-DMb/RT1-S3/Tnf
Environmental Information Processing	Signal transduction	rno04064	NF-kappa B signaling pathway	15/309	100/11023	0.15	5.35097	7.42248	1.09065e-07	3.29081e-06	2.40385e-06	78971/315120/116637/171369/81503/114105/171551/24494/25493/29527/25155/364867/24835/683206/301348	15	0.0485437	Birc3/Card10/Ccl4/Cd40/Cxcl1/Cxcl2/Cxcl3/Il1b/Nfkbia/Ptgs2/Syk/Ticam2/Tnf/Tnfaip3/Zap70
Human Diseases	Infectious disease: parasitic	rno05140	Leishmaniasis	13/309	74/11023	0.175676	6.2669	7.72	1.15519e-07	3.29081e-06	2.40385e-06	24232/116591/498276/64546/24493/24494/25493/24599/29527/309622/294273/310553/24835	13	0.0420712	C3/Fcgr2a/Fcgr2al1/Il12b/Il1a/Il1b/Nfkbia/Nos2/Ptgs2/RT1-Bb/RT1-DMb/Tlr2/Tnf
Human Diseases	Immune disease	rno05330	Allograft rejection	12/309	62/11023	0.193548	6.90448	7.91746	1.17111e-07	3.29081e-06	2.40385e-06	25660/171369/64546/309622/309603/414791/414789/414819/414779/294273/294228/24835	12	0.038835	Cd28/Cd40/Il12b/RT1-Bb/RT1-CE1/RT1-CE11/RT1-CE15/RT1-CE16/RT1-CE2/RT1-DMb/RT1-S3/Tnf
Organismal Systems	Immune system	rno04062	Chemokine signaling pathway	19/309	182/11023	0.104396	3.72412	6.29304	8.01574e-07	2.04766e-05	1.49576e-05	24770/29538/25542/116637/81780/287561/89808/81503/245920/306748/497942/114105/171551/60665/60628/80850/81760/25493/295378	19	0.0614887	Ccl2/Ccl20/Ccl3/Ccl4/Ccl5/Ccl7/Cx3cl1/Cxcl1/Cxcl10/Cxcl14/Cxcl16/Cxcl2/Cxcl3/Cxcl6/Cxcr4/Gng2/Grk1/Nfkbia/Vav3
Human Diseases	Infectious disease: bacterial	rno05134	Legionellosis	11/309	64/11023	0.171875	6.13132	6.99145	1.38992e-06	3.08914e-05	2.25654e-05	84480/24232/81503/114105/171551/64546/24494/24498/25493/310553/24835	11	0.0355987	Bnip3/C3/Cxcl1/Cxcl2/Cxcl3/Il12b/Il1b/Il6/Nfkbia/Tlr2/Tnf
Human Diseases	Infectious disease: parasitic	rno05142	Chagas disease	14/309	106/11023	0.132075	4.71155	6.52063	1.42914e-06	3.08914e-05	2.25654e-05	25245/24232/24770/25542/81780/64546/24494/24498/25493/24599/60660/117256/310553/24835	14	0.0453074	Bdkrb2/C3/Ccl2/Ccl3/Ccl5/Il12b/Il1b/Il6/Nfkbia/Nos2/Ppp2r2b/Ppp2r2c/Tlr2/Tnf
Environmental Information Processing	Signal transduction	rno04020	Calcium signaling pathway	22/309	254/11023	0.0866142	3.0898	5.72226	2.62628e-06	5.27132e-05	3.85056e-05	25369/25645/81509/25245/114862/56827/171358/60628/60464/24408/24411/24414/24938/79247/64354/308022/24599/59109/25041/81742/24716/83785	22	0.0711974	Adora2a/Adrb3/Bdkrb1/Bdkrb2/Cacna1h/Cacna1i/Camk1g/Cxcr4/Fgf16/Grin1/Grin2c/Grm1/Grpr/Htr5b/Htr6/Mcoln3/Nos2/Ntrk1/P2rx6/Pde1c/Ret/Vegfa
Metabolism	Carbohydrate metabolism	rno00010	Glycolysis / Gluconeogenesis	12/309	85/11023	0.141176	5.03621	6.34377	4.00625e-06	7.50505e-05	5.48224e-05	24172/310903/171178/25375/24191/24334/292804/25059/25060/60416/24644/499525	12	0.038835	Adh1c/Adh6/Adh7/Aldh3a1/Aldoc/Eno2/Gpi/Hk2/Hk3/Pfkp/Pgk1/Pgk1l1
Environmental Information Processing	Signaling molecules and interaction	rno04080	Neuroactive ligand-receptor interaction	28/309	391/11023	0.0716113	2.5546	5.31536	4.93657e-06	8.66985e-05	6.3331e-05	24167/25026/25369/25645/58812/81509/25245/24232/25590/64680/81658/25024/29627/24408/24411/24414/24938/79247/64354/679564/63887/29358/25041/117264/294807/60399/54305/24230	28	0.0906149	Adcyap1r1/Adm/Adora2a/Adrb3/Apln/Bdkrb1/Bdkrb2/C3/Chrna4/Crhr2/Gabrp/Gipr/Gria2/Grin1/Grin2c/Grm1/Grpr/Htr5b/Htr6/Lypd6/Nmu/Npy1r/P2rx6/P2ry6/Rxfp3/S1pr5/Sstr2/Tspo
Organismal Systems	Immune system	rno04620	Toll-like receptor signaling pathway	13/309	103/11023	0.126214	4.50244	6.06472	5.69636e-06	9.36657e-05	6.84203e-05	25542/116637/81780/171369/245920/64546/24494/24498/116596/25493/364867/310553/24835	13	0.0420712	Ccl3/Ccl4/Ccl5/Cd40/Cxcl10/Il12b/Il1b/Il6/Map3k8/Nfkbia/Ticam2/Tlr2/Tnf
Human Diseases	Infectious disease: bacterial	rno05133	Pertussis	11/309	74/11023	0.148649	5.30276	6.30681	6.08761e-06	9.36657e-05	6.84203e-05	192262/24232/60665/64546/24493/24494/24498/292060/24599/364867/24835	11	0.0355987	C1s/C3/Cxcl6/Il12b/Il1a/Il1b/Il6/Irf8/Nos2/Ticam2/Tnf
Human Diseases	Immune disease	rno05321	Inflammatory bowel disease	10/309	61/11023	0.163934	5.84806	6.44794	6.57673e-06	9.36657e-05	6.84203e-05	64546/301291/24493/24494/24498/291912/309622/294273/310553/24835	10	0.0323625	Il12b/Il17f/Il1a/Il1b/Il6/Nod2/RT1-Bb/RT1-DMb/Tlr2/Tnf
Human Diseases	Infectious disease: viral	rno05168	Herpes simplex virus 1 infection	20/309	229/11023	0.0873362	3.11556	5.49395	6.6666e-06	9.36657e-05	6.84203e-05	78971/24232/24770/81780/64546/24494/24498/25493/309622/309603/414791/414789/414819/414779/294273/294228/25155/310553/24835/366518	20	0.0647249	Birc3/C3/Ccl2/Ccl5/Il12b/Il1b/Il6/Nfkbia/RT1-Bb/RT1-CE1/RT1-CE11/RT1-CE15/RT1-CE16/RT1-CE2/RT1-DMb/RT1-S3/Syk/Tlr2/Tnf/Tnfrsf14
Human Diseases	Cardiovascular disease	rno05417	Lipid and atherosclerosis	19/309	223/11023	0.0852018	3.03942	5.22492	1.61653e-05	0.000216307	0.000158007	24770/25542/81780/171369/81503/114105/171551/24296/171562/64546/24494/24498/171045/81687/25493/364867/310553/24835/295378	19	0.0614887	Ccl2/Ccl3/Ccl5/Cd40/Cxcl1/Cxcl2/Cxcl3/Cyp1a1/Ero1a/Il12b/Il1b/Il6/Mmp3/Mmp9/Nfkbia/Ticam2/Tlr2/Tnf/Vav3
Human Diseases	Infectious disease: parasitic	rno05146	Amoebiasis	12/309	99/11023	0.121212	4.32402	5.64188	1.98273e-05	0.000253249	0.000184992	116630/81503/114105/171551/64546/24494/24498/305078/24599/266775/310553/24835	12	0.038835	Csf2/Cxcl1/Cxcl2/Cxcl3/Il12b/Il1b/Il6/Lamb3/Nos2/Serpinb10/Tlr2/Tnf
Human Diseases	Immune disease	rno05320	Autoimmune thyroid disease	10/309	76/11023	0.131579	4.69383	5.48745	4.80138e-05	0.000586603	0.000428498	25660/171369/309622/309603/414791/414789/414819/414779/294273/294228	10	0.0323625	Cd28/Cd40/RT1-Bb/RT1-CE1/RT1-CE11/RT1-CE15/RT1-CE16/RT1-CE2/RT1-DMb/RT1-S3
Metabolism	Carbohydrate metabolism	rno00051	Fructose and mannose metabolism	7/309	38/11023	0.184211	6.57137	5.84235	7.59487e-05	0.000889233	0.000649561	296972/286921/24191/25059/25060/25659/60416	7	0.0226537	Akr1b10/Akr1b8/Aldoc/Hk2/Hk3/Khk/Pfkp
Human Diseases	Infectious disease: viral	rno05163	Human cytomegalovirus infection	19/309	261/11023	0.0727969	2.5969	4.43388	0.000137972	0.00155081	0.00113283	24770/25542/116637/81780/89808/60628/80850/24494/24498/25493/29527/309603/414791/414789/414819/414779/294228/24835/83785	19	0.0614887	Ccl2/Ccl3/Ccl4/Ccl5/Cx3cl1/Cxcr4/Gng2/Il1b/Il6/Nfkbia/Ptgs2/RT1-CE1/RT1-CE11/RT1-CE15/RT1-CE16/RT1-CE2/RT1-S3/Tnf/Vegfa
Human Diseases	Endocrine and metabolic disease	rno04936	Alcoholic liver disease	13/309	140/11023	0.0928571	3.31251	4.67634	0.000151005	0.00163201	0.00119214	24172/310903/171178/24232/81503/114105/171551/64546/24494/24498/25493/83516/24835	13	0.0420712	Adh1c/Adh6/Adh7/C3/Cxcl1/Cxcl2/Cxcl3/Il12b/Il1b/Il6/Nfkbia/Ppargc1a/Tnf
Environmental Information Processing	Signal transduction	rno04066	HIF-1 signaling pathway	14/309	162/11023	0.0864198	3.08286	4.53542	0.000182339	0.00189767	0.0013862	24191/308913/54702/24334/25059/25060/24451/24498/24599/60416/24644/499525/24778/83785	14	0.0453074	Aldoc/Egln1/Egln3/Eno2/Hk2/Hk3/Hmox1/Il6/Nos2/Pfkp/Pgk1/Pgk1l1/Slc2a1/Vegfa
Human Diseases	Infectious disease: viral	rno05167	Kaposi sarcoma-associated herpesvirus infection	17/309	227/11023	0.0748899	2.67156	4.32152	0.000220882	0.00221671	0.00161925	24232/116630/81503/114105/171551/80850/24498/25493/29527/309603/414791/414789/414819/414779/294228/25155/83785	17	0.0550162	C3/Csf2/Cxcl1/Cxcl2/Cxcl3/Gng2/Il6/Nfkbia/Ptgs2/RT1-CE1/RT1-CE11/RT1-CE15/RT1-CE16/RT1-CE2/RT1-S3/Syk/Vegfa
Organismal Systems	Immune system	rno04640	Hematopoietic cell lineage	10/309	92/11023	0.108696	3.87752	4.70669	0.000244332	0.00236749	0.00172939	81641/116630/25610/24336/24493/24494/24498/309622/294273/24835	10	0.0323625	Anpep/Csf2/Csf3/Epor/Il1a/Il1b/Il6/RT1-Bb/RT1-DMb/Tnf
Human Diseases	Infectious disease: bacterial	rno05152	Tuberculosis	15/309	189/11023	0.0793651	2.8312	4.31227	0.000276495	0.00258984	0.00189181	24232/155151/116591/498276/64546/24493/24494/24498/291912/24599/309622/294273/25155/310553/24835	15	0.0485437	C3/Coro1a/Fcgr2a/Fcgr2al1/Il12b/Il1a/Il1b/Il6/Nod2/Nos2/RT1-Bb/RT1-DMb/Syk/Tlr2/Tnf
		rno04082	Neuroactive ligand signaling	15/309	194/11023	0.0773196	2.75823	4.19582	0.000366233	0.00330843	0.00241672	25369/25590/81658/80850/29627/24408/24411/24414/79247/64354/25041/117264/25550/29482/84012	15	0.0485437	Adora2a/Chrna4/Gabrp/Gng2/Gria2/Grin1/Grin2c/Grm1/Htr5b/Htr6/P2rx6/P2ry6/Slc1a1/Slc1a2/Slc1a6
Organismal Systems	Environmental adaptation	rno04713	Circadian entrainment	10/309	97/11023	0.103093	3.67764	4.49823	0.00037676	0.00330843	0.00241672	24167/114862/56827/80850/29627/24408/24411/497757/25202/64455	10	0.0323625	Adcyap1r1/Cacna1h/Cacna1i/Gng2/Gria2/Grin1/Grin2c/Gucy1a1/Gucy1b1/Rasd1
Cellular Processes	Transport and catabolism	rno04145	Phagosome	15/309	196/11023	0.0765306	2.73009	4.15026	0.000408576	0.00347909	0.00254138	24232/155151/116591/498276/309622/309603/414791/414789/414819/414779/294273/294228/445442/310553/500377	15	0.0485437	C3/Coro1a/Fcgr2a/Fcgr2al1/RT1-Bb/RT1-CE1/RT1-CE11/RT1-CE15/RT1-CE16/RT1-CE2/RT1-DMb/RT1-S3/Thbs1/Tlr2/Tuba8
Human Diseases	Cardiovascular disease	rno05416	Viral myocarditis	10/309	99/11023	0.10101	3.60335	4.41868	0.000444294	0.00367196	0.00268227	25660/171369/309622/309603/414791/414789/414819/414779/294273/294228	10	0.0323625	Cd28/Cd40/RT1-Bb/RT1-CE1/RT1-CE11/RT1-CE15/RT1-CE16/RT1-CE2/RT1-DMb/RT1-S3
Human Diseases	Infectious disease: viral	rno05165	Human papillomavirus infection	22/309	363/11023	0.0606061	2.16201	3.82312	0.000566805	0.00455064	0.00332412	64628/155437/313575/310683/364786/305078/406162/304545/60660/117256/29527/309603/414791/414789/414819/414779/294228/445442/24835/83785/315294/84426	22	0.0711974	Hes3/Hey1/Heyl/Itga10/Itga8/Lamb3/Notch4/Oasl/Ppp2r2b/Ppp2r2c/Ptgs2/RT1-CE1/RT1-CE11/RT1-CE15/RT1-CE16/RT1-CE2/RT1-S3/Thbs1/Tnf/Vegfa/Wnt10b/Wnt4
Environmental Information Processing	Signaling molecules and interaction	rno04514	Cell adhesion molecules	14/309	182/11023	0.0769231	2.74409	4.02905	0.00060153	0.00469528	0.00342978	25660/171369/65129/364786/116595/309622/309603/414791/414789/414819/414779/294273/294228/690899	14	0.0453074	Cd28/Cd40/Cldn1/Itga8/Nrxn2/RT1-Bb/RT1-CE1/RT1-CE11/RT1-CE15/RT1-CE16/RT1-CE2/RT1-DMb/RT1-S3/Vsir
Organismal Systems	Immune system	rno04612	Antigen processing and presentation	9/309	90/11023	0.1	3.56731	4.15302	0.000916783	0.0069626	0.005086	309622/309603/414791/414789/414819/414779/294273/294228/24835	9	0.0291262	RT1-Bb/RT1-CE1/RT1-CE11/RT1-CE15/RT1-CE16/RT1-CE2/RT1-DMb/RT1-S3/Tnf
Human Diseases	Infectious disease: viral	rno05169	Epstein-Barr virus infection	16/309	237/11023	0.0675105	2.40831	3.722	0.00104297	0.00771249	0.00563377	171369/245920/24498/25493/309622/309603/414791/414789/414819/414779/294273/294228/25155/310553/24835/683206	16	0.0517799	Cd40/Cxcl10/Il6/Nfkbia/RT1-Bb/RT1-CE1/RT1-CE11/RT1-CE15/RT1-CE16/RT1-CE2/RT1-DMb/RT1-S3/Syk/Tlr2/Tnf/Tnfaip3
Organismal Systems	Immune system	rno04672	Intestinal immune network for IgA production	6/309	43/11023	0.139535	4.97765	4.43806	0.00117553	0.00846986	0.00618701	25660/171369/60628/24498/309622/294273	6	0.0194175	Cd28/Cd40/Cxcr4/Il6/RT1-Bb/RT1-DMb
Human Diseases	Infectious disease: parasitic	rno05145	Toxoplasmosis	10/309	114/11023	0.0877193	3.12922	3.88074	0.00134259	0.0093647	0.00684067	78971/171369/64546/305078/25493/24599/309622/294273/310553/24835	10	0.0323625	Birc3/Cd40/Il12b/Lamb3/Nfkbia/Nos2/RT1-Bb/RT1-DMb/Tlr2/Tnf
Human Diseases	Infectious disease: parasitic	rno05144	Malaria	8/309	77/11023	0.103896	3.7063	4.04694	0.00136638	0.0093647	0.00684067	24770/171369/25610/24494/24498/445442/310553/24835	8	0.02589	Ccl2/Cd40/Csf3/Il1b/Il6/Thbs1/Tlr2/Tnf
Organismal Systems	Digestive system	rno04978	Mineral absorption	7/309	62/11023	0.112903	4.02761	4.0598	0.00166717	0.0111542	0.00814783	24218/25319/500946/24451/24567/689415/304784	7	0.0226537	Atp7b/Fth1/Hephl1/Hmox1/Mt1/Mt2A/Slc26a9
Metabolism	Carbohydrate metabolism	rno00052	Galactose metabolism	5/309	32/11023	0.15625	5.57393	4.40027	0.00181155	0.0118383	0.00864756	296972/286921/25059/25060/60416	5	0.0161812	Akr1b10/Akr1b8/Hk2/Hk3/Pfkp
Organismal Systems	Circulatory system	rno04270	Vascular smooth muscle contraction	11/309	140/11023	0.0785714	2.80289	3.6458	0.00192166	0.0122724	0.0089647	81633/25365/25026/25369/497757/25202/308899/83731/29747/29692/29354	11	0.0355987	Acta2/Actg2/Adm/Adora2a/Gucy1a1/Gucy1b1/Irag1/Kcnma1/Kcnmb1/Pla2g2a/Pla2g5
Environmental Information Processing	Signal transduction	rno04010	MAPK signaling pathway	18/309	302/11023	0.0596026	2.12621	3.37008	0.00213142	0.0133095	0.00972226	114862/56827/60587/60464/24493/24494/307950/116596/500690/29477/24596/84423/59109/94202/192213/24716/24835/83785	18	0.0582524	Cacna1h/Cacna1i/Dusp4/Fgf16/Il1a/Il1b/Map3k21/Map3k8/Map3k9/Mapt/Ngfr/Nrtn/Ntrk1/Ptprr/Rasgrf1/Ret/Tnf/Vegfa
Organismal Systems	Immune system	rno04621	NOD-like receptor signaling pathway	13/309	186/11023	0.0698925	2.49328	3.48801	0.00222732	0.013606	0.00993883	78971/24770/81780/81503/114105/171551/685067/24494/24498/25493/291912/24835/683206	13	0.0420712	Birc3/Ccl2/Ccl5/Cxcl1/Cxcl2/Cxcl3/Gbp7/Il1b/Il6/Nfkbia/Nod2/Tnf/Tnfaip3
Human Diseases	Infectious disease: viral	rno05166	Human T-cell leukemia virus 1 infection	16/309	256/11023	0.0625	2.22957	3.38034	0.0023118	0.0138216	0.0100963	171369/116630/25445/24498/25493/309622/309603/414791/414789/414819/414779/294273/294228/24778/24835/24230	16	0.0517799	Cd40/Csf2/Fosl1/Il6/Nfkbia/RT1-Bb/RT1-CE1/RT1-CE11/RT1-CE15/RT1-CE16/RT1-CE2/RT1-DMb/RT1-S3/Slc2a1/Tnf/Tspo
Metabolism	Carbohydrate metabolism	rno00500	Starch and sucrose metabolism	5/309	34/11023	0.147059	5.24605	4.21094	0.00239136	0.0139994	0.0102262	288333/292804/25059/25060/64035	5	0.0161812	Gbe1/Gpi/Hk2/Hk3/Pygl
Human Diseases	Cancer: overview	rno05230	Central carbon metabolism in cancer	7/309	71/11023	0.0985915	3.51707	3.61336	0.00364071	0.0208784	0.0152511	25059/25060/59109/60416/24716/80878/24778	7	0.0226537	Hk2/Hk3/Ntrk1/Pfkp/Ret/Slc16a3/Slc2a1
Human Diseases	Substance dependence	rno05033	Nicotine addiction	5/309	40/11023	0.125	4.45914	3.72196	0.00493255	0.027721	0.0202494	25590/81658/29627/24408/24411	5	0.0161812	Chrna4/Gabrp/Gria2/Grin1/Grin2c
Environmental Information Processing	Signal transduction	rno04151	PI3K-Akt signaling pathway	19/309	356/11023	0.0533708	1.9039	2.94415	0.00547011	0.0301393	0.0220159	25610/140942/24336/60464/80850/24498/310683/364786/305078/24596/84423/59109/60660/117256/24716/25155/445442/310553/83785	19	0.0614887	Csf3/Ddit4/Epor/Fgf16/Gng2/Il6/Itga10/Itga8/Lamb3/Ngfr/Nrtn/Ntrk1/Ppp2r2b/Ppp2r2c/Ret/Syk/Thbs1/Tlr2/Vegfa
Cellular Processes	Cell motility	rno04820	Cytoskeleton in muscle cells	14/309	232/11023	0.0603448	2.15269	3.01342	0.00578344	0.0312528	0.0228294	29437/25365/27064/64362/291760/24334/310683/364786/304816/287408/691644/24583/29211/445442	14	0.0453074	Acta1/Actg2/Ankrd1/Des/Dsc2/Eno2/Itga10/Itga8/Lmod1/Myh1/Myh2/Myh3/Sptbn2/Thbs1
Human Diseases	Infectious disease: viral	rno05164	Influenza A	12/309	185/11023	0.0648649	2.31393	3.06068	0.00590131	0.0312881	0.0228551	24770/81780/245920/64546/24493/24494/24498/25493/309622/294273/65190/24835	12	0.038835	Ccl2/Ccl5/Cxcl10/Il12b/Il1a/Il1b/Il6/Nfkbia/RT1-Bb/RT1-DMb/Rsad2/Tnf
Human Diseases	Immune disease	rno05310	Asthma	4/309	27/11023	0.148148	5.28491	3.78564	0.00638642	0.033233	0.0242759	171369/309622/294273/24835	4	0.012945	Cd40/RT1-Bb/RT1-DMb/Tnf
Human Diseases	Immune disease	rno05322	Systemic lupus erythematosus	9/309	120/11023	0.075	2.67549	3.13395	0.00655388	0.0334844	0.0244595	192262/24232/25660/171369/116591/498276/309622/294273/24835	9	0.0291262	C1s/C3/Cd28/Cd40/Fcgr2a/Fcgr2al1/RT1-Bb/RT1-DMb/Tnf
Organismal Systems	Immune system	rno04660	T cell receptor signaling pathway	9/309	123/11023	0.0731707	2.61023	3.04973	0.00767172	0.0384956	0.02812	25660/116630/116596/25493/60660/117256/24835/295378/301348	9	0.0291262	Cd28/Csf2/Map3k8/Nfkbia/Ppp2r2b/Ppp2r2c/Tnf/Vav3/Zap70
Environmental Information Processing	Signal transduction	rno04330	Notch signaling pathway	6/309	64/11023	0.09375	3.34436	3.1942	0.00886167	0.0434494	0.0317387	300802/687424/155437/313575/29147/406162	6	0.0194175	Aph1b/Dtx1/Hey1/Heyl/Jag2/Notch4
Metabolism	Amino acid metabolism	rno00350	Tyrosine metabolism	5/309	46/11023	0.108696	3.87752	3.32115	0.0089682	0.0434494	0.0317387	24172/310903/171178/25375/54349	5	0.0161812	Adh1c/Adh6/Adh7/Aldh3a1/Aox1
Metabolism	Xenobiotics biodegradation and metabolism	rno00980	Metabolism of xenobiotics by cytochrome P450	7/309	85/11023	0.0823529	2.93779	3.04565	0.0097074	0.0457682	0.0334325	24172/310903/171178/25375/24296/24421/25116	7	0.0226537	Adh1c/Adh6/Adh7/Aldh3a1/Cyp1a1/Gsta1/Hsd11b1
Environmental Information Processing	Signal transduction	rno04024	cAMP signaling pathway	13/309	222/11023	0.0585586	2.08897	2.78351	0.00977258	0.0457682	0.0334325	24167/25369/64680/25024/29627/24408/24411/353250/64354/25493/29358/54305/295378	13	0.0420712	Adcyap1r1/Adora2a/Crhr2/Gipr/Gria2/Grin1/Grin2c/Hcar2/Htr6/Nfkbia/Npy1r/Sstr2/Vav3
Metabolism	Metabolism of cofactors and vitamins	rno00790	Folate biosynthesis	4/309	31/11023	0.129032	4.60299	3.41145	0.0104906	0.0483257	0.0353007	296972/286921/361267/29244	4	0.012945	Akr1b10/Akr1b8/Akr1c15/Gch1
Organismal Systems	Development and regeneration	rno04380	Osteoclast differentiation	9/309	132/11023	0.0681818	2.43226	2.81131	0.0119073	0.053967	0.0394215	25732/116591/498276/25445/24493/24494/25493/25155/24835	9	0.0291262	Acp5/Fcgr2a/Fcgr2al1/Fosl1/Il1a/Il1b/Nfkbia/Syk/Tnf
Metabolism	Energy metabolism	rno00910	Nitrogen metabolism	3/309	18/11023	0.166667	5.94552	3.56605	0.0130254	0.0580974	0.0424387	363085/54232/313495	3	0.00970874	Car12/Car3/Car9
Human Diseases	Endocrine and metabolic disease	rno04931	Insulin resistance	8/309	112/11023	0.0714286	2.54808	2.79643	0.0133507	0.0586181	0.042819	24498/25493/83516/192280/309513/64035/24778/24835	8	0.02589	Il6/Nfkbia/Ppargc1a/Ppp1r3b/Ppp1r3c/Pygl/Slc2a1/Tnf
Organismal Systems	Immune system	rno04625	C-type lectin receptor signaling pathway	8/309	114/11023	0.0701754	2.50338	2.74007	0.0147347	0.0636991	0.0465305	680611/64546/24494/24498/25493/29527/25155/24835	8	0.02589	Bcl3/Il12b/Il1b/Il6/Nfkbia/Ptgs2/Syk/Tnf
Organismal Systems	Endocrine system	rno04924	Renin secretion	6/309	72/11023	0.0833333	2.97276	2.85199	0.0153501	0.0648584	0.0473774	24167/25645/497757/25202/83731/81742	6	0.0194175	Adcyap1r1/Adrb3/Gucy1a1/Gucy1b1/Kcnma1/Pde1c
Organismal Systems	Nervous system	rno04724	Glutamatergic synapse	8/309	115/11023	0.0695652	2.48161	2.71234	0.0154645	0.0648584	0.0473774	80850/29627/24408/24411/24414/25550/29482/84012	8	0.02589	Gng2/Gria2/Grin1/Grin2c/Grm1/Slc1a1/Slc1a2/Slc1a6
Human Diseases	Cancer: overview	rno05202	Transcriptional misregulation in cancer	11/309	194/11023	0.056701	2.0227	2.44056	0.0207702	0.0858298	0.0626965	78971/171369/116630/25587/24498/171045/81687/304005/24596/59109/60357	11	0.0355987	Birc3/Cd40/Csf2/Id2/Il6/Mmp3/Mmp9/Nfkbiz/Ngfr/Ntrk1/Prom1
Human Diseases	Infectious disease: parasitic	rno05143	African trypanosomiasis	4/309	38/11023	0.105263	3.75507	2.88907	0.0211343	0.0860689	0.0628711	64546/24494/24498/24835	4	0.012945	Il12b/Il1b/Il6/Tnf
Metabolism	Xenobiotics biodegradation and metabolism	rno00982	Drug metabolism - cytochrome P450	6/309	78/11023	0.0769231	2.74409	2.62507	0.0219815	0.08824	0.064457	24172/310903/171178/25375/54349/24421	6	0.0194175	Adh1c/Adh6/Adh7/Aldh3a1/Aox1/Gsta1
Organismal Systems	Endocrine system	rno04913	Ovarian steroidogenesis	5/309	58/11023	0.0862069	3.07527	2.69103	0.0228797	0.090552	0.0661459	50559/361267/25147/24296/29527	5	0.0161812	Acot1/Akr1c15/Cyp19a1/Cyp1a1/Ptgs2
Metabolism	Global and overview maps	rno01250	Biosynthesis of nucleotide sugars	4/309	40/11023	0.1	3.56731	2.76237	0.0250576	0.0977943	0.0714362	361245/292804/25059/25060	4	0.012945	Cmah/Gpi/Hk2/Hk3
Organismal Systems	Immune system	rno04623	Cytosolic DNA-sensing pathway	6/309	81/11023	0.0740741	2.64245	2.51954	0.0259274	0.0998027	0.0729033	116637/81780/245920/24494/24498/25493	6	0.0194175	Ccl4/Ccl5/Cxcl10/Il1b/Il6/Nfkbia
Organismal Systems	Immune system	rno04659	Th17 cell differentiation	7/309	104/11023	0.0673077	2.40108	2.43793	0.0267695	0.101652	0.0742539	301291/24494/24498/25493/309622/294273/301348	7	0.0226537	Il17f/Il1b/Il6/Nfkbia/RT1-Bb/RT1-DMb/Zap70
Organismal Systems	Endocrine system	rno04926	Relaxin signaling pathway	8/309	129/11023	0.0620155	2.21229	2.35202	0.028605	0.107173	0.0782874	81633/80850/171052/81687/25493/24599/294807/83785	8	0.02589	Acta2/Gng2/Mmp13/Mmp9/Nfkbia/Nos2/Rxfp3/Vegfa
Human Diseases	Cancer: specific types	rno05219	Bladder cancer	4/309	42/11023	0.0952381	3.39744	2.64354	0.0293917	0.107822	0.0787608	306722/81687/445442/83785	4	0.012945	Dapk1/Mmp9/Thbs1/Vegfa
Organismal Systems	Nervous system	rno04730	Long-term depression	5/309	62/11023	0.0806452	2.87687	2.51674	0.0295454	0.107822	0.0787608	25740/29627/24414/497757/25202	5	0.0161812	Gnaz/Gria2/Grm1/Gucy1a1/Gucy1b1
Human Diseases	Cardiovascular disease	rno05418	Fluid shear stress and atherosclerosis	9/309	155/11023	0.0580645	2.07134	2.28115	0.0303868	0.10947	0.0799653	25698/24770/24421/24451/24493/24494/81687/24835/83785	9	0.0291262	Ass1/Ccl2/Gsta1/Hmox1/Il1a/Il1b/Mmp9/Tnf/Vegfa
Organismal Systems	Endocrine system	rno04911	Insulin secretion	6/309	86/11023	0.0697674	2.48882	2.35384	0.0335009	0.119162	0.0870444	24167/83731/29747/54263/65206/24778	6	0.0194175	Adcyap1r1/Kcnma1/Kcnmb1/Kcnn3/Kcnn4/Slc2a1
Metabolism	Global and overview maps	rno01200	Carbon metabolism	8/309	135/11023	0.0592593	2.11396	2.21155	0.0360845	0.126747	0.0925852	24191/24334/292804/25059/25060/60416/24644/499525	8	0.02589	Aldoc/Eno2/Gpi/Hk2/Hk3/Pfkp/Pgk1/Pgk1l1
Organismal Systems	Immune system	rno04658	Th1 and Th2 cell differentiation	6/309	88/11023	0.0681818	2.43226	2.2908	0.0368925	0.127985	0.0934897	64546/29147/25493/309622/294273/301348	6	0.0194175	Il12b/Jag2/Nfkbia/RT1-Bb/RT1-DMb/Zap70
Human Diseases	Cancer: overview	rno05235	PD-L1 expression and PD-1 checkpoint pathway in cancer	6/309	90/11023	0.0666667	2.37821	2.22946	0.0404966	0.138775	0.101371	299206/25660/25493/364867/310553/301348	6	0.0194175	Batf/Cd28/Nfkbia/Ticam2/Tlr2/Zap70
Human Diseases	Infectious disease: bacterial	rno05135	Yersinia infection	8/309	139/11023	0.057554	2.05313	2.12192	0.0417451	0.14133	0.103238	24770/498276/24494/24498/25493/24835/295378/301348	8	0.02589	Ccl2/Fcgr2al1/Il1b/Il6/Nfkbia/Tnf/Vav3/Zap70
Human Diseases	Drug resistance: antineoplastic	rno01523	Antifolate resistance	3/309	28/11023	0.107143	3.82212	2.53916	0.0426177	0.142566	0.104141	24494/24498/24835	3	0.00970874	Il1b/Il6/Tnf
Human Diseases	Substance dependence	rno05030	Cocaine addiction	4/309	48/11023	0.0833333	2.97276	2.32609	0.0449099	0.148467	0.108451	29627/24408/24411/29481	4	0.012945	Gria2/Grin1/Grin2c/Rgs9
Metabolism	Global and overview maps	rno01230	Biosynthesis of amino acids	6/309	93/11023	0.0645161	2.30149	2.14046	0.0463079	0.151308	0.110527	24191/25698/24334/60416/24644/499525	6	0.0194175	Aldoc/Ass1/Eno2/Pfkp/Pgk1/Pgk1l1
Metabolism	Lipid metabolism	rno00140	Steroid hormone biosynthesis	6/309	97/11023	0.0618557	2.20659	2.02697	0.0548242	0.177076	0.129349	361267/25147/24296/29277/25116/292915	6	0.0194175	Akr1c15/Cyp19a1/Cyp1a1/Cyp2c11/Hsd11b1/Sult2b1
Metabolism	Metabolism of cofactors and vitamins	rno00830	Retinol metabolism	6/309	98/11023	0.0612245	2.18407	1.99946	0.0570918	0.182304	0.133169	24172/310903/171178/54349/24296/29277	6	0.0194175	Adh1c/Adh6/Adh7/Aox1/Cyp1a1/Cyp2c11
Metabolism	Carbohydrate metabolism	rno00030	Pentose phosphate pathway	3/309	32/11023	0.09375	3.34436	2.25535	0.0595078	0.187884	0.137245	24191/292804/60416	3	0.00970874	Aldoc/Gpi/Pfkp
Human Diseases	Infectious disease: bacterial	rno05150	Staphylococcus aureus infection	6/309	100/11023	0.06	2.14039	1.94543	0.0617939	0.192934	0.140934	192262/24232/116591/498276/309622/294273	6	0.0194175	C1s/C3/Fcgr2a/Fcgr2al1/RT1-Bb/RT1-DMb
Human Diseases	Neurodegenerative disease	rno05017	Spinocerebellar ataxia	8/309	152/11023	0.0526316	1.87753	1.85005	0.064088	0.197477	0.144252	266729/29627/24408/24411/24414/117101/84012/29211	8	0.02589	Dab1/Gria2/Grin1/Grin2c/Grm1/Kcnc3/Slc1a6/Sptbn2
Human Diseases	Cancer: overview	rno05205	Proteoglycans in cancer	10/309	206/11023	0.0485437	1.73171	1.80032	0.0646544	0.197477	0.144252	64537/64546/81687/445442/310553/24835/295378/83785/315294/84426	10	0.0323625	Hpse/Il12b/Mmp9/Thbs1/Tlr2/Tnf/Vav3/Vegfa/Wnt10b/Wnt4
Metabolism	Amino acid metabolism	rno00330	Arginine and proline metabolism	4/309	55/11023	0.0727273	2.59441	2.01303	0.0677927	0.204836	0.149627	29593/24599/360526/308652	4	0.012945	Ckmt1/Nos2/P4ha2/Smox
Human Diseases	Infectious disease: viral	rno05162	Measles	8/309	155/11023	0.0516129	1.84119	1.7911	0.0701293	0.209642	0.153138	25660/64546/24493/24494/24498/25493/310553/683206	8	0.02589	Cd28/Il12b/Il1a/Il1b/Il6/Nfkbia/Tlr2/Tnfaip3
Human Diseases	Endocrine and metabolic disease	rno04933	AGE-RAGE signaling pathway in diabetic complications	6/309	104/11023	0.0576923	2.05807	1.84108	0.0718669	0.212575	0.15528	24770/24493/24494/24498/24835/83785	6	0.0194175	Ccl2/Il1a/Il1b/Il6/Tnf/Vegfa
Organismal Systems	Immune system	rno04650	Natural killer cell mediated cytotoxicity	6/309	106/11023	0.0566038	2.01923	1.79064	0.077237	0.226079	0.165145	116630/116591/25155/24835/295378/301348	6	0.0194175	Csf2/Fcgr2a/Syk/Tnf/Vav3/Zap70
Environmental Information Processing	Signal transduction	rno04390	Hippo signaling pathway	8/309	159/11023	0.0503145	1.79487	1.71449	0.0787097	0.226902	0.165746	78971/252835/25587/60660/117256/315294/84426/303039	8	0.02589	Birc3/Gdf5/Id2/Ppp2r2b/Ppp2r2c/Wnt10b/Wnt4/Wwc1
Organismal Systems	Endocrine system	rno04923	Regulation of lipolysis in adipocytes	4/309	58/11023	0.0689655	2.46022	1.89348	0.0791331	0.226902	0.165746	25645/79451/29358/29527	4	0.012945	Adrb3/Fabp4/Npy1r/Ptgs2
Organismal Systems	Digestive system	rno04970	Salivary secretion	5/309	83/11023	0.060241	2.14898	1.78434	0.0832939	0.23642	0.172699	25645/497757/25202/83731/65206	5	0.0161812	Adrb3/Gucy1a1/Gucy1b1/Kcnma1/Kcnn4
Cellular Processes	Cell growth and death	rno04215	Apoptosis - multiple species	3/309	39/11023	0.0769231	2.74409	1.85291	0.0952848	0.26775	0.195585	78971/24596/287606	3	0.00970874	Birc3/Ngfr/Septin4
Organismal Systems	Immune system	rno04610	Complement and coagulation cascades	5/309	87/11023	0.0574713	2.05018	1.67004	0.0971218	0.269323	0.196734	81509/25245/192262/24232/60325	5	0.0161812	Bdkrb1/Bdkrb2/C1s/C3/Serpinb2
Environmental Information Processing	Signal transduction	rno04350	TGF-beta signaling pathway	6/309	113/11023	0.0530973	1.89415	1.62245	0.0977614	0.269323	0.196734	24373/252835/25587/445442/315728/24835	6	0.0194175	Fst/Gdf5/Id2/Thbs1/Thsd4/Tnf
Metabolism	Lipid metabolism	rno00561	Glycerolipid metabolism	4/309	63/11023	0.0634921	2.26496	1.70992	0.0999705	0.271128	0.198052	296972/286921/305166/363261	4	0.012945	Akr1b10/Akr1b8/Gpat3/Mogat1
Human Diseases	Cancer: overview	rno05206	MicroRNAs in cancer	13/309	312/11023	0.0416667	1.48638	1.48004	0.100346	0.271128	0.198052	140942/24451/100314279/100314241/100314163/100314059/100314002/100314005/81687/406162/29527/445442/83785	13	0.0420712	Ddit4/Hmox1/Mir101a/Mir146a/Mir221/Mir222/Mir23b/Mir27b/Mmp9/Notch4/Ptgs2/Thbs1/Vegfa
Metabolism	Carbohydrate metabolism	rno00520	Amino sugar and nucleotide sugar metabolism	3/309	41/11023	0.0731707	2.61023	1.75417	0.106806	0.285832	0.208793	292804/25059/25060	3	0.00970874	Gpi/Hk2/Hk3
Human Diseases	Cancer: overview	rno05204	Chemical carcinogenesis - DNA adducts	5/309	90/11023	0.0555556	1.98184	1.58828	0.108207	0.28612	0.209003	24296/29277/24421/25116/29527	5	0.0161812	Cyp1a1/Cyp2c11/Gsta1/Hsd11b1/Ptgs2
Organismal Systems	Endocrine system	rno04929	GnRH secretion	4/309	65/11023	0.0615385	2.19527	1.64131	0.10895	0.28612	0.209003	114862/56827/54263/65206	4	0.012945	Cacna1h/Cacna1i/Kcnn3/Kcnn4
Organismal Systems	Nervous system	rno04720	Long-term potentiation	4/309	66/11023	0.0606061	2.16201	1.60794	0.113571	0.295495	0.215851	29627/24408/24411/24414	4	0.012945	Gria2/Grin1/Grin2c/Grm1
Metabolism	Lipid metabolism	rno00590	Arachidonic acid metabolism	5/309	92/11023	0.0543478	1.93876	1.5355	0.115926	0.296555	0.216626	361267/29277/29692/29354/29527	5	0.0161812	Akr1c15/Cyp2c11/Pla2g2a/Pla2g5/Ptgs2
Metabolism	Amino acid metabolism	rno00220	Arginine biosynthesis	2/309	21/11023	0.0952381	3.39744	1.86748	0.116089	0.296555	0.216626	25698/24599	2	0.00647249	Ass1/Nos2
Organismal Systems	Immune system	rno04664	Fc epsilon RI signaling pathway	4/309	68/11023	0.0588235	2.09842	1.54294	0.123067	0.311548	0.227578	116630/25155/24835/295378	4	0.012945	Csf2/Syk/Tnf/Vav3
Environmental Information Processing	Signal transduction	rno04014	Ras signaling pathway	10/309	236/11023	0.0423729	1.51157	1.34911	0.127369	0.318148	0.232399	60464/80850/24408/24596/59109/29692/29354/192213/83785/301348	10	0.0323625	Fgf16/Gng2/Grin1/Ngfr/Ntrk1/Pla2g2a/Pla2g5/Rasgrf1/Vegfa/Zap70
Organismal Systems	Immune system	rno04622	RIG-I-like receptor signaling pathway	4/309	69/11023	0.057971	2.06801	1.51128	0.127939	0.318148	0.232399	245920/64546/25493/24835	4	0.012945	Cxcl10/Il12b/Nfkbia/Tnf
Human Diseases	Cancer: specific types	rno05224	Breast cancer	7/309	151/11023	0.0463576	1.65372	1.3736	0.131954	0.325255	0.23759	60464/155437/313575/29147/406162/315294/84426	7	0.0226537	Fgf16/Hey1/Heyl/Jag2/Notch4/Wnt10b/Wnt4
Cellular Processes	Cell growth and death	rno04217	Necroptosis	8/309	181/11023	0.0441989	1.57671	1.32855	0.136495	0.333522	0.243629	78971/25319/24493/24494/64035/364867/24835/683206	8	0.02589	Birc3/Fth1/Il1a/Il1b/Pygl/Ticam2/Tnf/Tnfaip3
Metabolism	Carbohydrate metabolism	rno00620	Pyruvate metabolism	3/309	47/11023	0.0638298	2.27701	1.48989	0.144294	0.34954	0.25533	24172/310903/171178	3	0.00970874	Adh1c/Adh6/Adh7
Cellular Processes	Transport and catabolism	rno04144	Endocytosis	11/309	275/11023	0.04	1.42693	1.21755	0.150605	0.350084	0.255727	287443/60628/360605/81760/311785/309603/414791/414789/414819/414779/294228	11	0.0355987	Acap1/Cxcr4/Epn3/Grk1/Psd4/RT1-CE1/RT1-CE11/RT1-CE15/RT1-CE16/RT1-CE2/RT1-S3
Organismal Systems	Digestive system	rno04973	Carbohydrate digestion and absorption	3/309	48/11023	0.0625	2.22957	1.44979	0.15092	0.350084	0.255727	25059/25060/65197	3	0.00970874	Hk2/Hk3/Slc2a5
Organismal Systems	Endocrine system	rno04920	Adipocytokine signaling pathway	4/309	74/11023	0.0540541	1.92828	1.36063	0.15345	0.350084	0.255727	25493/83516/24778/24835	4	0.012945	Nfkbia/Ppargc1a/Slc2a1/Tnf
Human Diseases	Cancer: specific types	rno05222	Small cell lung cancer	5/309	101/11023	0.049505	1.766	1.31332	0.153703	0.350084	0.255727	78971/305078/25493/24599/29527	5	0.0161812	Birc3/Lamb3/Nfkbia/Nos2/Ptgs2
Human Diseases	Cardiovascular disease	rno05410	Hypertrophic cardiomyopathy	5/309	101/11023	0.049505	1.766	1.31332	0.153703	0.350084	0.255727	64362/24498/310683/364786/24835	5	0.0161812	Des/Il6/Itga10/Itga8/Tnf
Metabolism	Lipid metabolism	rno00592	alpha-Linolenic acid metabolism	2/309	25/11023	0.08	2.85385	1.57587	0.154432	0.350084	0.255727	29692/29354	2	0.00647249	Pla2g2a/Pla2g5
Organismal Systems	Sensory system	rno04744	Phototransduction	2/309	25/11023	0.08	2.85385	1.57587	0.154432	0.350084	0.255727	81760/29481	2	0.00647249	Grk1/Rgs9
Metabolism	Lipid metabolism	rno00565	Ether lipid metabolism	3/309	49/11023	0.0612245	2.18407	1.41067	0.157641	0.350084	0.255727	29692/29354/301265	3	0.00970874	Pla2g2a/Pla2g5/Pla2g7
Metabolism	Lipid metabolism	rno00564	Glycerophospholipid metabolism	5/309	102/11023	0.0490196	1.74868	1.29003	0.158187	0.350084	0.255727	687071/305166/287644/29692/29354	5	0.0161812	Etnppl/Gpat3/Phospho1/Pla2g2a/Pla2g5
Cellular Processes	Cell growth and death	rno04218	Cellular senescence	8/309	188/11023	0.0425532	1.51801	1.21656	0.158452	0.350084	0.255727	24493/24498/309603/414791/414789/414819/414779/294228	8	0.02589	Il1a/Il6/RT1-CE1/RT1-CE11/RT1-CE15/RT1-CE16/RT1-CE2/RT1-S3
Organismal Systems	Nervous system	rno04723	Retrograde endocannabinoid signaling	7/309	159/11023	0.0440252	1.57052	1.23057	0.159256	0.350084	0.255727	100911581/81658/80850/29627/24414/100362331/29527	7	0.0226537	Faah/Gabrp/Gng2/Gria2/Grm1/Ndufa4l2/Ptgs2
Environmental Information Processing	Signal transduction	rno04071	Sphingolipid signaling pathway	6/309	131/11023	0.0458015	1.63388	1.23944	0.162116	0.350084	0.255727	25245/499174/60660/117256/60399/24835	6	0.0194175	Bdkrb2/Cers3/Ppp2r2b/Ppp2r2c/S1pr5/Tnf
Human Diseases	Endocrine and metabolic disease	rno04934	Cushing syndrome	7/309	160/11023	0.04375	1.5607	1.21325	0.162839	0.350084	0.255727	114862/56827/64680/25469/64455/315294/84426	7	0.0226537	Cacna1h/Cacna1i/Crhr2/Kcna4/Rasd1/Wnt10b/Wnt4
Metabolism	Lipid metabolism	rno00071	Fatty acid degradation	3/309	50/11023	0.06	2.14039	1.37249	0.164452	0.350084	0.255727	24172/310903/171178	3	0.00970874	Adh1c/Adh6/Adh7
Metabolism	Lipid metabolism	rno00591	Linoleic acid metabolism	3/309	50/11023	0.06	2.14039	1.37249	0.164452	0.350084	0.255727	29277/29692/29354	3	0.00970874	Cyp2c11/Pla2g2a/Pla2g5
Human Diseases	Endocrine and metabolic disease	rno04930	Type II diabetes mellitus	3/309	50/11023	0.06	2.14039	1.37249	0.164452	0.350084	0.255727	25059/25060/24835	3	0.00970874	Hk2/Hk3/Tnf
Human Diseases	Infectious disease: viral	rno05170	Human immunodeficiency virus 1 infection	11/309	281/11023	0.0391459	1.39646	1.14325	0.166492	0.351762	0.256953	60628/80850/25493/309603/414791/414789/414819/414779/294228/310553/24835	11	0.0355987	Cxcr4/Gng2/Nfkbia/RT1-CE1/RT1-CE11/RT1-CE15/RT1-CE16/RT1-CE2/RT1-S3/Tlr2/Tnf
Cellular Processes	Transport and catabolism	rno04148	Efferocytosis	7/309	162/11023	0.0432099	1.54143	1.17896	0.170112	0.354256	0.258775	89808/60587/24336/117264/29527/24778/445442	7	0.0226537	Cx3cl1/Dusp4/Epor/P2ry6/Ptgs2/Slc2a1/Thbs1
Metabolism	Nucleotide metabolism	rno00230	Purine metabolism	6/309	133/11023	0.0451128	1.60931	1.20057	0.170194	0.354256	0.258775	684425/29223/497757/25202/25711/81742	6	0.0194175	Adss1/Ak4/Gucy1a1/Gucy1b1/Gucy2c/Pde1c
Organismal Systems	Digestive system	rno04977	Vitamin digestion and absorption	2/309	27/11023	0.0740741	2.64245	1.45108	0.174409	0.359136	0.26234	314459/24710	2	0.00647249	Amn/Rbp2
Cellular Processes	Cell motility	rno04814	Motor proteins	8/309	193/11023	0.0414508	1.47868	1.13931	0.175095	0.359136	0.26234	29437/81633/25365/363288/287408/691644/24583/500377	8	0.02589	Acta1/Acta2/Actg2/Kif1a/Myh1/Myh2/Myh3/Tuba8
Organismal Systems	Digestive system	rno04979	Cholesterol metabolism	3/309	52/11023	0.0576923	2.05807	1.29875	0.178329	0.363119	0.265249	362850/100361444/24230	3	0.00970874	Angptl4/Angptl8/Tspo
Organismal Systems	Nervous system	rno04721	Synaptic vesicle cycle	4/309	79/11023	0.0506329	1.80623	1.2213	0.180695	0.363856	0.265787	25550/29482/84012/117100	4	0.012945	Slc1a1/Slc1a2/Slc1a6/Slc6a7
Human Diseases	Cancer: overview	rno05203	Viral carcinogenesis	9/309	225/11023	0.04	1.42693	1.09877	0.181281	0.363856	0.265787	24232/25493/309603/414791/414789/414819/414779/294228/25155	9	0.0291262	C3/Nfkbia/RT1-CE1/RT1-CE11/RT1-CE15/RT1-CE16/RT1-CE2/RT1-S3/Syk
Environmental Information Processing	Signal transduction	rno04392	Hippo signaling pathway - multiple species	2/309	28/11023	0.0714286	2.54808	1.39286	0.184546	0.365814	0.267217	310550/303039	2	0.00647249	Dchs2/Wwc1
Environmental Information Processing	Signal transduction	rno04630	JAK-STAT signaling pathway	7/309	166/11023	0.0421687	1.50429	1.11176	0.185074	0.365814	0.267217	54349/313173/116630/25610/24336/64546/24498	7	0.0226537	Aox1/Cntfr/Csf2/Csf3/Epor/Il12b/Il6
Human Diseases	Cancer: specific types	rno05215	Prostate cancer	5/309	108/11023	0.0462963	1.65153	1.1555	0.186161	0.365814	0.267217	24414/60663/171045/81687/25493	5	0.0161812	Grm1/Insrr/Mmp3/Mmp9/Nfkbia
Organismal Systems	Endocrine system	rno04910	Insulin signaling pathway	6/309	138/11023	0.0434783	1.55101	1.10615	0.191098	0.372907	0.272399	25059/25060/83516/192280/309513/64035	6	0.0194175	Hk2/Hk3/Ppargc1a/Ppp1r3b/Ppp1r3c/Pygl
Metabolism	Amino acid metabolism	rno00340	Histidine metabolism	2/309	29/11023	0.0689655	2.46022	1.33712	0.194766	0.377443	0.275712	25375/29301	2	0.00647249	Aldh3a1/Hal
Metabolism	Metabolism of cofactors and vitamins	rno00860	Porphyrin metabolism	3/309	55/11023	0.0545455	1.94581	1.19414	0.199707	0.384368	0.280771	25319/500946/24451	3	0.00970874	Fth1/Hephl1/Hmox1
Metabolism	Global and overview maps	rno01232	Nucleotide metabolism	4/309	83/11023	0.0481928	1.71919	1.11688	0.203558	0.386715	0.282485	684425/29223/362638/289801	4	0.012945	Adss1/Ak4/Cda/Upp1
Environmental Information Processing	Signal transduction	rno04022	cGMP-PKG signaling pathway	7/309	171/11023	0.0409357	1.4603	1.0302	0.204509	0.386715	0.282485	25645/25245/497757/25202/308899/83731/29747	7	0.0226537	Adrb3/Bdkrb2/Gucy1a1/Gucy1b1/Irag1/Kcnma1/Kcnmb1
Metabolism	Glycan biosynthesis and metabolism	rno00512	Mucin type O-glycan biosynthesis	2/309	30/11023	0.0666667	2.37821	1.28366	0.205055	0.386715	0.282485	290638/292325	2	0.00647249	B3gnt3/B3gnt6
Human Diseases	Infectious disease: viral	rno05160	Hepatitis C	7/309	172/11023	0.0406977	1.45181	1.0142	0.208488	0.387992	0.283418	65129/245920/25493/60660/117256/65190/24835	7	0.0226537	Cldn1/Cxcl10/Nfkbia/Ppp2r2b/Ppp2r2c/Rsad2/Tnf
Cellular Processes	Cell growth and death	rno04210	Apoptosis	6/309	142/11023	0.0422535	1.50732	1.03329	0.208494	0.387992	0.283418	78971/25493/59109/287606/24835/500377	6	0.0194175	Birc3/Nfkbia/Ntrk1/Septin4/Tnf/Tuba8
Cellular Processes	Cellular community - eukaryotes	rno04510	Focal adhesion	8/309	203/11023	0.0394089	1.40584	0.991107	0.210562	0.389263	0.284346	78971/310683/364786/305078/192213/445442/295378/83785	8	0.02589	Birc3/Itga10/Itga8/Lamb3/Rasgrf1/Thbs1/Vav3/Vegfa
Cellular Processes	Cellular community - eukaryotes	rno04540	Gap junction	4/309	87/11023	0.045977	1.64014	1.01799	0.227216	0.414596	0.302851	24414/497757/25202/500377	4	0.012945	Grm1/Gucy1a1/Gucy1b1/Tuba8
Human Diseases	Cardiovascular disease	rno05412	Arrhythmogenic right ventricular cardiomyopathy	4/309	87/11023	0.045977	1.64014	1.01799	0.227216	0.414596	0.302851	64362/291760/310683/364786	4	0.012945	Des/Dsc2/Itga10/Itga8
Cellular Processes	Cell motility	rno04810	Regulation of actin cytoskeleton	9/309	240/11023	0.0375	1.33774	0.89837	0.232077	0.420733	0.307335	81509/25245/60628/60464/60663/310683/364786/24559/295378	9	0.0291262	Bdkrb1/Bdkrb2/Cxcr4/Fgf16/Insrr/Itga10/Itga8/Mos/Vav3
Human Diseases	Neurodegenerative disease	rno05010	Alzheimer disease	15/309	434/11023	0.0345622	1.23294	0.840814	0.237216	0.427293	0.312126	300802/84683/24408/24411/24493/24494/24498/29477/100362331/24599/29527/24835/500377/315294/84426	15	0.0485437	Aph1b/Cox4i2/Grin1/Grin2c/Il1a/Il1b/Il6/Mapt/Ndufa4l2/Nos2/Ptgs2/Tnf/Tuba8/Wnt10b/Wnt4
Environmental Information Processing	Signaling molecules and interaction	rno04512	ECM-receptor interaction	4/309	90/11023	0.0444444	1.58547	0.947092	0.245396	0.432091	0.315631	310683/364786/305078/445442	4	0.012945	Itga10/Itga8/Lamb3/Thbs1
Metabolism	Metabolism of other amino acids	rno00410	beta-Alanine metabolism	2/309	34/11023	0.0588235	2.09842	1.08934	0.246677	0.432091	0.315631	25375/308652	2	0.00647249	Aldh3a1/Smox
Organismal Systems	Endocrine system	rno04614	Renin-angiotensin system	2/309	34/11023	0.0588235	2.09842	1.08934	0.246677	0.432091	0.315631	81641/64017	2	0.00647249	Anpep/Enpep
Organismal Systems	Environmental adaptation	rno04710	Circadian rhythm	2/309	34/11023	0.0588235	2.09842	1.08934	0.246677	0.432091	0.315631	79431/306750	2	0.00647249	Bhlhe40/Fbxl21
Metabolism	Metabolism of cofactors and vitamins	rno00750	Vitamin B6 metabolism	1/309	10/11023	0.1	3.56731	1.3793	0.247568	0.432091	0.315631	54349	1	0.00323625	Aox1
Metabolism	Carbohydrate metabolism	rno00040	Pentose and glucuronate interconversions	2/309	36/11023	0.0555556	1.98184	1.00204	0.267624	0.456999	0.333826	296972/286921	2	0.00647249	Akr1b10/Akr1b8
Human Diseases	Immune disease	rno05340	Primary immunodeficiency	2/309	36/11023	0.0555556	1.98184	1.00204	0.267624	0.456999	0.333826	171369/301348	2	0.00647249	Cd40/Zap70
Organismal Systems	Sensory system	rno04750	Inflammatory mediator regulation of TRP channels	5/309	124/11023	0.0403226	1.43843	0.833786	0.268009	0.456999	0.333826	81509/25245/29277/24494/59109	5	0.0161812	Bdkrb1/Bdkrb2/Cyp2c11/Il1b/Ntrk1
		rno04081	Hormone signaling	8/309	218/11023	0.0366972	1.30911	0.782811	0.268344	0.456999	0.333826	25645/64680/24336/25024/80850/25711/500946/54305	8	0.02589	Adrb3/Crhr2/Epor/Gipr/Gng2/Gucy2c/Hephl1/Sstr2
		rno04382	Cornified envelope formation	8/309	223/11023	0.0358744	1.27975	0.716721	0.288571	0.483723	0.353347	499174/65129/303687/29301/305078/688413/60660/117256	8	0.02589	Cers3/Cldn1/Evpl/Hal/Lamb3/Lce1m/Ppp2r2b/Ppp2r2c
Human Diseases	Drug resistance: antineoplastic	rno01522	Endocrine resistance	4/309	97/11023	0.0412371	1.47106	0.791339	0.288918	0.483723	0.353347	114496/29147/81687/406162	4	0.012945	Bik/Jag2/Mmp9/Notch4
Metabolism	Metabolism of cofactors and vitamins	rno00740	Riboflavin metabolism	1/309	12/11023	0.0833333	2.97276	1.16114	0.289201	0.483723	0.353347	25732	1	0.00323625	Acp5
Environmental Information Processing	Signal transduction	rno04152	AMPK signaling pathway	5/309	129/11023	0.0387597	1.38268	0.742455	0.295115	0.484219	0.353709	291541/60416/83516/60660/117256	5	0.0161812	Cidea/Pfkp/Ppargc1a/Ppp2r2b/Ppp2r2c
Organismal Systems	Immune system	rno04666	Fc gamma R-mediated phagocytosis	4/309	98/11023	0.0408163	1.45605	0.770096	0.29523	0.484219	0.353709	116591/498276/25155/295378	4	0.012945	Fcgr2a/Fcgr2al1/Syk/Vav3
Environmental Information Processing	Signal transduction	rno04150	mTOR signaling pathway	6/309	161/11023	0.0372671	1.32943	0.715088	0.29746	0.484219	0.353709	140942/293561/297960/24835/315294/84426	6	0.0194175	Ddit4/Rnf152/Rragd/Tnf/Wnt10b/Wnt4
Human Diseases	Substance dependence	rno05031	Amphetamine addiction	3/309	68/11023	0.0441176	1.57381	0.806035	0.297467	0.484219	0.353709	29627/24408/24411	3	0.00970874	Gria2/Grin1/Grin2c
Metabolism	Amino acid metabolism	rno00250	Alanine, aspartate and glutamate metabolism	2/309	39/11023	0.0512821	1.82939	0.881141	0.299011	0.484219	0.353709	684425/25698	2	0.00647249	Adss1/Ass1
Organismal Systems	Nervous system	rno04726	Serotonergic synapse	5/309	130/11023	0.0384615	1.37204	0.724646	0.300594	0.484219	0.353709	29277/80850/79247/64354/29527	5	0.0161812	Cyp2c11/Gng2/Htr5b/Htr6/Ptgs2
Metabolism	Xenobiotics biodegradation and metabolism	rno00983	Drug metabolism - other enzymes	4/309	99/11023	0.040404	1.44134	0.749088	0.30156	0.484219	0.353709	362638/679817/24421/289801	4	0.012945	Cda/Ces1a/Gsta1/Upp1
Genetic Information Processing	Information processing in viruses	rno03260	Virion - Human immunodeficiency virus	1/309	13/11023	0.0769231	2.74409	1.06851	0.309148	0.488488	0.356828	60628	1	0.00323625	Cxcr4
Metabolism	Metabolism of cofactors and vitamins	rno00760	Nicotinate and nicotinamide metabolism	2/309	40/11023	0.05	1.78366	0.843197	0.309434	0.488488	0.356828	54349/293504	2	0.00647249	Aox1/Qprt
Human Diseases	Cancer: specific types	rno05216	Thyroid cancer	2/309	40/11023	0.05	1.78366	0.843197	0.309434	0.488488	0.356828	59109/24716	2	0.00647249	Ntrk1/Ret
Organismal Systems	Endocrine system	rno04927	Cortisol synthesis and secretion	3/309	70/11023	0.0428571	1.52885	0.753785	0.312887	0.49118	0.358794	114862/56827/25469	3	0.00970874	Cacna1h/Cacna1i/Kcna4
Human Diseases	Cancer: overview	rno05208	Chemical carcinogenesis - reactive oxygen species	9/309	266/11023	0.0338346	1.20699	0.580323	0.330025	0.509713	0.372332	361267/84683/24296/24421/24451/100362331/25493/304784/83785	9	0.0291262	Akr1c15/Cox4i2/Cyp1a1/Gsta1/Hmox1/Ndufa4l2/Nfkbia/Slc26a9/Vegfa
Organismal Systems	Digestive system	rno04974	Protein digestion and absorption	4/309	104/11023	0.0384615	1.37204	0.647371	0.333403	0.509713	0.372332	367236/315071/65206/25550	4	0.012945	Col19a1/Col22a1/Kcnn4/Slc1a1
Human Diseases	Cardiovascular disease	rno05414	Dilated cardiomyopathy	4/309	104/11023	0.0384615	1.37204	0.647371	0.333403	0.509713	0.372332	64362/310683/364786/24835	4	0.012945	Des/Itga10/Itga8/Tnf
Environmental Information Processing	Signal transduction	rno04068	FoxO signaling pathway	5/309	136/11023	0.0367647	1.31151	0.620761	0.333762	0.509713	0.372332	84480/29157/313558/24414/24498	5	0.0161812	Bnip3/Ccng2/Foxo6/Grm1/Il6
Environmental Information Processing	Signal transduction	rno04371	Apelin signaling pathway	5/309	136/11023	0.0367647	1.31151	0.620761	0.333762	0.509713	0.372332	81633/58812/80850/24599/83516	5	0.0161812	Acta2/Apln/Gng2/Nos2/Ppargc1a
Human Diseases	Infectious disease: viral	rno05161	Hepatitis B	6/309	169/11023	0.035503	1.2665	0.592901	0.337012	0.511893	0.373925	24498/81687/25493/364867/310553/24835	6	0.0194175	Il6/Mmp9/Nfkbia/Ticam2/Tlr2/Tnf
Human Diseases	Cancer: specific types	rno05211	Renal cell carcinoma	4/309	106/11023	0.0377358	1.34616	0.608145	0.346195	0.523015	0.382049	308913/54702/24778/83785	4	0.012945	Egln1/Egln3/Slc2a1/Vegfa
Organismal Systems	Endocrine system	rno04922	Glucagon signaling pathway	4/309	107/11023	0.0373832	1.33358	0.588827	0.352596	0.529837	0.387032	60416/83516/64035/24778	4	0.012945	Pfkp/Ppargc1a/Pygl/Slc2a1
Human Diseases	Neurodegenerative disease	rno05020	Prion disease	10/309	307/11023	0.0325733	1.16199	0.488853	0.359272	0.536997	0.392262	81780/84683/24408/24411/24493/24494/24498/100362331/24835/500377	10	0.0323625	Ccl5/Cox4i2/Grin1/Grin2c/Il1a/Il1b/Il6/Ndufa4l2/Tnf/Tuba8
Organismal Systems	Digestive system	rno04975	Fat digestion and absorption	2/309	46/11023	0.0434783	1.55101	0.635956	0.371096	0.551736	0.403029	29692/29354	2	0.00647249	Pla2g2a/Pla2g5
Cellular Processes	Cell growth and death	rno04216	Ferroptosis	2/309	48/11023	0.0416667	1.48638	0.573493	0.391188	0.578546	0.422613	25319/24451	2	0.00647249	Fth1/Hmox1
Metabolism	Lipid metabolism	rno00061	Fatty acid biosynthesis	1/309	18/11023	0.0555556	1.98184	0.707972	0.400818	0.589685	0.430749	64669	1	0.00323625	Olah
Organismal Systems	Immune system	rno04662	B cell receptor signaling pathway	3/309	82/11023	0.0365854	1.30511	0.470951	0.404992	0.592723	0.432969	25493/25155/295378	3	0.00970874	Nfkbia/Syk/Vav3
Environmental Information Processing	Signal transduction	rno04015	Rap1 signaling pathway	7/309	217/11023	0.0322581	1.15075	0.380871	0.407292	0.593001	0.433172	25369/60464/24408/24596/445442/295378/83785	7	0.0226537	Adora2a/Fgf16/Grin1/Ngfr/Thbs1/Vav3/Vegfa
Human Diseases	Endocrine and metabolic disease	rno04932	Non-alcoholic fatty liver disease	6/309	184/11023	0.0326087	1.16325	0.379239	0.412306	0.597206	0.436243	84683/24493/24494/24498/100362331/24835	6	0.0194175	Cox4i2/Il1a/Il1b/Il6/Ndufa4l2/Tnf
Metabolism	Amino acid metabolism	rno00380	Tryptophan metabolism	2/309	51/11023	0.0392157	1.39895	0.484943	0.420768	0.606338	0.442914	54349/24296	2	0.00647249	Aox1/Cyp1a1
Metabolism	Metabolism of cofactors and vitamins	rno00730	Thiamine metabolism	1/309	20/11023	0.05	1.78366	0.595688	0.433995	0.620864	0.453525	29223	1	0.00323625	Ak4
Organismal Systems	Immune system	rno04670	Leukocyte transendothelial migration	4/309	120/11023	0.0333333	1.1891	0.353715	0.435268	0.620864	0.453525	65129/60628/81687/295378	4	0.012945	Cldn1/Cxcr4/Mmp9/Vav3
Organismal Systems	Endocrine system	rno04921	Oxytocin signaling pathway	5/309	156/11023	0.0320513	1.14337	0.306266	0.445133	0.628951	0.459432	171358/497757/25202/116649/29527	5	0.0161812	Camk1g/Gucy1a1/Gucy1b1/Kcnj4/Ptgs2
Metabolism	Glycan biosynthesis and metabolism	rno00531	Glycosaminoglycan degradation	1/309	21/11023	0.047619	1.69872	0.544266	0.44989	0.628951	0.459432	64537	1	0.00323625	Hpse
Metabolism	Glycan biosynthesis and metabolism	rno00541	Biosynthesis of various nucleotide sugars	1/309	21/11023	0.047619	1.69872	0.544266	0.44989	0.628951	0.459432	361245	1	0.00323625	Cmah
Genetic Information Processing	Information processing in viruses	rno03265	Virion - Ebolavirus, Lyssavirus and Morbillivirus	1/309	21/11023	0.047619	1.69872	0.544266	0.44989	0.628951	0.459432	24596	1	0.00323625	Ngfr
Organismal Systems	Nervous system	rno04722	Neurotrophin signaling pathway	4/309	123/11023	0.0325203	1.1601	0.303228	0.453999	0.631554	0.461333	362456/25493/24596/59109	4	0.012945	Arhgdib/Nfkbia/Ngfr/Ntrk1
Metabolism	Nucleotide metabolism	rno00240	Pyrimidine metabolism	2/309	55/11023	0.0363636	1.29721	0.375239	0.459029	0.635309	0.464077	362638/289801	2	0.00647249	Cda/Upp1
Human Diseases	Drug resistance: antineoplastic	rno01524	Platinum drug resistance	3/309	90/11023	0.0333333	1.1891	0.305906	0.464471	0.635309	0.464077	24218/78971/24421	3	0.00970874	Atp7b/Birc3/Gsta1
Genetic Information Processing	Information processing in viruses	rno03266	Virion - Herpesvirus	1/309	22/11023	0.0454545	1.62151	0.495535	0.46534	0.635309	0.464077	366518	1	0.00323625	Tnfrsf14
Environmental Information Processing	Membrane transport	rno02010	ABC transporters	2/309	56/11023	0.0357143	1.27404	0.349139	0.468364	0.635309	0.464077	310836/25560	2	0.00647249	Abca4/Abcc9
Organismal Systems	Nervous system	rno04727	GABAergic synapse	3/309	91/11023	0.032967	1.17604	0.286358	0.47173	0.635309	0.464077	81658/80850/29430	3	0.00970874	Gabrp/Gng2/Hap1
Human Diseases	Substance dependence	rno05032	Morphine addiction	3/309	91/11023	0.032967	1.17604	0.286358	0.47173	0.635309	0.464077	81658/80850/81742	3	0.00970874	Gabrp/Gng2/Pde1c
Organismal Systems	Endocrine system	rno04919	Thyroid hormone signaling pathway	4/309	126/11023	0.031746	1.13248	0.253991	0.472525	0.635309	0.464077	406162/60416/24778/84426	4	0.012945	Notch4/Pfkp/Slc2a1/Wnt4
Human Diseases	Infectious disease: bacterial	rno05132	Salmonella infection	8/309	268/11023	0.0298507	1.06487	0.182574	0.479164	0.641166	0.468355	78971/24494/24498/25493/192181/310553/24835/500377	8	0.02589	Birc3/Il1b/Il6/Nfkbia/Podxl/Tlr2/Tnf/Tuba8
[truncated: 70 more rows]

## Sheet: GO Treatment vs Model
ONTOLOGY	ID	Description	GeneRatio	BgRatio	RichFactor	FoldEnrichment	zScore	pvalue	p.adjust	qvalue	geneID	Count	GeneRatioDecimal
[truncated: 1,522 more rows]

## Sheet: KEGG Treatment vs Model
category	subcategory	ID	Description	GeneRatio	BgRatio	RichFactor	FoldEnrichment	zScore	pvalue	p.adjust	qvalue	geneID	Count	GeneRatioDecimal	GeneListSymbols
[truncated: 272 more rows]
