# Supplementary material for: Dental Follicle Mesenchymal Stem Cell-Derived Exosomes Mitigate Temporomandibular Joint Osteoarthritis in an In Vitro Model via the miR-146a-5p/Traf6/NF-κB Axis
Source: Research Square preprint supplement (doi:10.21203/rs.3.rs-8341412/v1), 2025-12-19
Supplement: Supplementary file 5 [file 4a36c974bb94a5f2fc4fc230.xlsx]

## Sheet: All_miRNA.mature.readcount
Symbol	Treatment_1	Treatment_2	Treatment_3	Model_1	Model_2	Model_3
novel_100	0	0	0	1	0	0
novel_106	1	0	0	0	3	0
novel_107	0	0	0	2	6	1
novel_108	0	0	0	0	0	0
novel_109	1	1	2	1	0	2
novel_11	13	8	21	38	36	44
novel_110	0	1	0	1	2	3
novel_112	0	0	0	0	1	2
novel_116	0	0	0	0	0	1
novel_12	7	14	9	42	41	19
novel_126	0	0	0	0	0	0
novel_138	1	0	0	0	0	0
novel_14	29	18	44	27	16	22
novel_142	0	0	0	0	0	0
novel_143	0	0	4	1	0	1
novel_146	0	0	0	0	0	0
novel_148	0	0	0	0	2	0
novel_15	8	6	8	27	16	16
novel_154	0	0	0	0	0	0
novel_156	0	0	0	0	0	0
novel_157	0	0	0	0	0	0
novel_16	2	7	4	23	20	9
novel_160	0	0	0	0	0	0
novel_162	0	0	0	0	0	0
novel_168	0	0	0	0	0	0
novel_176	0	0	0	0	0	0
novel_177	1	0	0	3	2	0
novel_178	0	0	0	0	0	0
novel_179	0	0	0	0	0	0
novel_187	3	3	2	7	7	3
novel_189	6	4	3	13	5	15
novel_190	0	0	1	0	3	3
novel_192	0	0	0	0	1	2
novel_194	0	0	0	0	0	0
novel_195	0	0	0	0	0	0
novel_197	0	2	0	0	0	0
novel_198	2	0	1	0	3	0
novel_200	0	0	0	0	0	0
novel_201	0	0	0	1	2	0
novel_203	1	2	2	5	1	2
novel_204	0	0	0	0	0	0
novel_208	3	0	0	3	1	1
novel_21	9	13	6	19	17	26
novel_210	3	2	1	5	2	1
novel_211	0	3	2	3	1	2
novel_215	0	0	0	0	0	0
novel_216	0	0	3	0	2	0
novel_217	0	0	0	0	0	0
novel_219	0	2	1	6	4	3
novel_22	0	0	4	14	7	7
novel_221	0	0	0	3	0	3
novel_227	0	0	0	0	0	0
novel_229	0	0	0	0	0	0
novel_230	0	0	0	1	0	0
novel_238	16	12	18	14	28	22
novel_24	0	0	0	0	0	0
novel_240	0	0	2	13	13	5
novel_243	2	1	0	0	0	3
novel_256	0	1	0	1	0	0
novel_263	0	0	2	2	1	0
novel_264	7	4	8	31	19	19
novel_269	102	75	123	216	104	114
novel_27	5	8	2	5	13	7
novel_271	0	2	6	4	3	4
novel_273	0	0	0	3	0	0
novel_274	0	1	0	0	0	0
novel_279	1	1	4	0	2	3
novel_281	1	0	0	2	0	2
novel_283	0	0	0	0	0	0
novel_287	0	0	0	1	0	0
novel_288	0	0	0	1	1	0
novel_289	0	2	0	1	1	0
novel_29	1	0	1	1	3	0
novel_292	0	0	0	0	0	0
novel_294	9	4	8	11	7	4
novel_298	6	0	6	6	5	6
novel_30	8	5	15	11	15	4
novel_302	2	8	5	3	11	4
novel_304	0	0	0	0	0	0
novel_305	3	0	4	4	3	7
novel_306	0	0	0	0	0	0
novel_309	0	0	0	0	0	0
novel_310	1	0	0	0	0	0
novel_312	9	9	9	7	3	5
novel_317	4	1	2	2	0	0
novel_319	0	0	0	0	0	0
novel_321	0	0	0	0	0	0
novel_322	0	0	1	0	0	0
novel_326	0	0	0	0	2	0
novel_328	0	0	0	1	0	0
novel_331	0	0	0	2	0	0
novel_336	2	0	0	0	0	0
novel_337	0	0	1	2	0	0
novel_338	0	0	0	2	4	1
novel_340	0	0	0	0	0	0
novel_341	1	2	0	2	1	1
novel_343	0	2	0	1	0	1
novel_344	1	1	0	1	1	0
novel_347	0	3	0	0	0	0
novel_348	0	3	1	1	0	2
novel_349	1	0	0	0	0	1
novel_356	1	5	2	8	0	2
novel_358	0	0	1	0	0	2
novel_359	3	0	1	4	0	0
novel_360	0	0	0	0	0	0
novel_366	361	282	480	462	356	491
novel_368	1	0	0	0	0	0
novel_369	0	0	0	0	0	0
novel_374	0	0	0	0	0	0
novel_378	1	0	0	0	0	0
novel_379	0	0	0	0	0	0
novel_380	10	7	17	22	16	18
novel_383	661427	533383	429385	955482	817043	715686
novel_392	0	0	0	0	0	0
novel_393	0	0	0	0	4	0
novel_398	0	0	0	0	0	0
novel_399	0	0	0	0	0	0
novel_403	0	0	0	0	0	0
novel_407	0	0	0	2	1	1
novel_416	0	0	0	0	0	0
novel_417	0	0	1	0	0	0
novel_418	0	0	0	0	0	0
novel_419	0	0	0	0	0	1
novel_42	2	0	0	0	0	0
novel_423	0	0	0	0	0	0
novel_425	1	0	1	0	0	0
novel_426	2	2	2	4	3	5
novel_427	0	0	5	0	0	0
novel_43	4	0	1	1	0	1
novel_430	0	0	0	0	0	0
novel_433	0	0	0	0	0	0
novel_435	26	11	7	78	94	82
novel_436	0	0	1	1	0	0
novel_440	0	0	0	1	1	2
novel_441	0	0	0	0	0	0
novel_442	27	17	34	21	33	22
novel_446	0	0	0	0	0	0
novel_449	0	0	0	0	0	1
novel_450	0	0	0	0	2	2
novel_451	0	0	0	0	0	0
novel_452	0	0	0	0	0	0
novel_453	3	0	3	0	2	1
novel_456	0	0	0	0	0	2
novel_457	0	0	0	0	0	0
novel_458	38	43	37	48	34	55
novel_459	3	1	0	0	0	0
novel_460	1	1	0	0	0	0
novel_461	0	0	0	0	0	0
novel_462	0	4	4	0	0	3
novel_463	0	0	0	0	0	0
novel_468	0	0	0	0	0	0
novel_470	0	0	0	0	0	0
novel_471	0	1	1	0	0	1
novel_48	0	0	0	0	3	4
novel_480	0	0	0	0	0	0
novel_481	0	0	0	0	0	4
novel_482	0	0	0	0	0	0
novel_484	0	0	0	0	0	0
novel_485	0	0	0	1	0	0
novel_486	0	0	0	0	0	3
novel_487	0	0	0	0	0	0
novel_488	0	0	0	3	1	0
novel_489	7	1	0	5	1	11
novel_49	0	1	1	3	8	3
novel_494	0	0	0	0	0	0
novel_495	0	0	0	0	0	0
novel_496	0	0	0	0	0	0
novel_498	0	0	1	2	0	0
novel_5	8	2	5	41	38	37
novel_50	8	2	2	3	4	13
novel_501	0	0	0	0	0	0
novel_503	0	0	0	0	0	0
novel_504	2	0	0	0	0	0
novel_507	0	1	0	1	0	0
novel_510	0	0	0	0	1	0
novel_513	1	0	0	0	0	1
novel_516	0	0	0	0	0	0
novel_517	0	0	0	0	0	0
novel_518	0	0	0	3	0	0
novel_52	0	3	0	0	0	0
novel_520	0	0	0	0	0	0
novel_521	0	0	0	0	0	0
novel_522	1	0	1	0	1	0
novel_523	3	0	5	3	1	2
novel_524	0	0	0	0	0	0
novel_525	0	0	0	3	0	1
novel_528	0	0	0	0	0	0
novel_529	0	0	0	2	0	0
novel_531	0	0	0	0	0	0
novel_534	0	0	2	0	0	0
novel_536	0	0	0	0	0	1
novel_537	0	0	0	0	0	0
novel_543	0	0	0	0	0	0
novel_545	0	0	0	0	0	0
novel_546	0	0	0	0	0	0
novel_550	0	0	0	0	0	0
novel_551	0	0	1	1	1	0
novel_554	0	0	1	1	0	0
novel_559	0	0	0	0	0	0
novel_564	0	0	0	0	3	0
novel_565	0	0	0	2	0	0
novel_569	0	0	0	0	1	0
novel_570	0	0	0	0	0	1
novel_572	0	0	0	0	0	0
novel_574	14	1	12	14	5	6
novel_575	0	0	0	0	0	0
novel_576	0	0	0	1	0	0
novel_577	1	2	1	1	4	1
novel_578	0	0	0	0	2	0
novel_579	2	0	0	0	0	0
novel_582	3	1	0	2	4	4
novel_60	4	2	4	0	5	2
novel_62	2	1	4	2	0	3
novel_63	0	0	2	1	0	1
novel_64	2	6	5	3	5	3
novel_65	0	0	0	1	5	0
novel_67	0	1	0	0	0	6
novel_68	1	1	0	4	3	3
novel_72	1	1	0	1	0	3
novel_75	2	0	0	2	0	3
novel_76	1	1	0	1	0	4
novel_78	0	1	0	0	0	1
novel_79	0	0	0	0	1	1
novel_80	1	1	0	1	1	0
novel_83	1	3	1	1	3	7
novel_87	5	0	2	0	1	6
novel_88	0	0	0	0	0	0
novel_92	2	1	0	0	0	0
novel_93	4	0	2	7	0	0
novel_94	0	0	0	2	2	0
novel_95	0	0	0	0	0	0
rno-let-7a-1-3p	19	14	25	14	16	16
rno-let-7a-2-3p	3	3	1	3	4	3
rno-let-7a-5p	76554	59039	83073	76327	85560	77169
rno-let-7b-3p	1188	997	825	1860	1480	1476
rno-let-7b-5p	181972	133520	185056	159759	186452	162228
rno-let-7c-1-3p	10	16	11	61	63	44
rno-let-7c-2-3p	27	16	14	20	30	30
rno-let-7c-5p	338331	243221	344863	284841	327916	299536
rno-let-7d-3p	20647	16276	18365	29769	23699	22826
rno-let-7d-5p	30695	23211	33514	31756	35608	32597
rno-let-7e-3p	168	188	208	429	264	344
rno-let-7e-5p	13877	10977	14826	18178	20005	18183
rno-let-7f-1-3p	3	3	1	3	3	0
rno-let-7f-2-3p	2	5	2	0	2	1
rno-let-7f-5p	14867	10397	13975	12796	14739	12558
rno-let-7g-3p	0	4	1	0	0	0
rno-let-7g-5p	11789	8641	12309	10176	11455	10148
rno-let-7i-3p	9	5	23	12	7	11
rno-let-7i-5p	43752	30656	43253	35143	37861	34225
rno-miR-1-3p	1	0	0	0	1	0
rno-miR-1-5p	0	7	5	7	3	6
rno-miR-100-3p	2	5	7	6	3	5
rno-miR-100-5p	10940	8887	11975	13771	12142	11911
rno-miR-101a-3p	2225	1525	1728	1274	1652	1259
rno-miR-101a-5p	5	0	0	6	0	3
rno-miR-101b-3p	683	445	601	419	518	421
rno-miR-101b-5p	0	0	0	0	0	0
rno-miR-103-1-5p	0	0	0	0	0	0
rno-miR-103-2-5p	0	0	1	0	0	0
rno-miR-103-3p	2910	2581	3116	3420	3687	3150
rno-miR-105	0	0	0	0	0	0
rno-miR-106b-3p	2013	1668	2434	2988	2799	2694
rno-miR-106b-5p	33	25	57	43	54	37
rno-miR-107-3p	330	261	403	377	383	366
rno-miR-107-5p	0	0	0	0	0	0
rno-miR-10a-3p	0	0	0	0	0	0
rno-miR-10a-5p	1	0	2	3	1	3
rno-miR-10b-3p	0	0	1	0	5	2
rno-miR-10b-5p	68	35	30	58	76	63
rno-miR-1188-3p	14	11	17	34	22	22
rno-miR-1188-5p	49	66	83	240	207	220
rno-miR-1193-3p	111	90	127	131	97	105
rno-miR-1193-5p	0	0	0	0	0	0
rno-miR-1199-3p	1	2	3	0	0	0
rno-miR-1199-5p	3	1	6	0	1	0
rno-miR-122-3p	0	0	0	0	0	0
rno-miR-122-5p	3	0	0	1	0	0
rno-miR-1224	17	8	13	30	24	11
rno-miR-122b	3	2	0	0	1	0
rno-miR-124-3p	0	0	0	0	0	2
rno-miR-124-5p	2	1	0	2	0	0
rno-miR-1247-3p	19	18	42	122	86	119
rno-miR-1247-5p	379	279	332	615	439	482
rno-miR-1249	151	124	184	395	333	352
rno-miR-125a-3p	1009	760	1026	1625	1613	1709
rno-miR-125a-5p	242571	208919	237483	367453	269897	283634
rno-miR-125b-1-3p	4007	3280	4289	5385	5249	5258
rno-miR-125b-2-3p	1022	749	800	1391	1317	1442
rno-miR-125b-5p	278937	268320	263866	424601	319194	332433
rno-miR-126a-3p	17	11	31	28	21	21
rno-miR-126a-5p	7	0	4	1	2	2
rno-miR-126b	1	1	4	1	0	1
rno-miR-127-3p	14510	11522	17118	16918	15358	14783
rno-miR-127-5p	484	336	327	406	356	330
rno-miR-128-1-5p	10	5	11	50	69	53
rno-miR-128-2-5p	2	4	1	2	2	5
rno-miR-128-3p	956	831	1019	1119	1105	979
rno-miR-129-1-3p	3	0	0	1	1	2
rno-miR-129-2-3p	107	99	100	171	121	142
rno-miR-129-5p	983	780	1131	1401	1434	1373
rno-miR-1297	0	0	0	0	0	0
rno-miR-1298	0	0	0	0	0	0
rno-miR-1306-3p	48	26	51	93	57	68
rno-miR-1306-5p	162	167	237	442	291	364
rno-miR-130a-3p	16	12	26	16	20	21
rno-miR-130a-5p	1	0	0	2	0	1
rno-miR-130b-3p	2	0	2	0	0	0
rno-miR-130b-5p	15	10	19	45	55	60
rno-miR-132-3p	316	305	389	559	577	445
rno-miR-132-5p	58	55	89	82	98	83
rno-miR-133a-3p	0	3	0	1	0	1
rno-miR-133a-5p	0	0	0	0	0	0
rno-miR-133b-3p	0	0	0	0	0	0
rno-miR-133b-5p	2	0	0	0	0	0
rno-miR-133c	0	1	0	4	0	0
rno-miR-134-3p	5	3	4	15	5	3
rno-miR-134-5p	1585	1311	1763	2589	2356	2362
rno-miR-135a-3p	0	0	0	0	0	0
rno-miR-135a-5p	0	0	0	0	0	0
rno-miR-135b-3p	0	0	0	0	0	0
rno-miR-135b-5p	0	0	0	0	0	0
rno-miR-136-3p	41	31	57	47	34	26
rno-miR-136-5p	12	12	21	3	7	3
rno-miR-137-3p	0	0	0	0	0	0
rno-miR-137-5p	0	0	0	0	0	0
rno-miR-138-1-3p	0	0	0	0	1	0
rno-miR-138-2-3p	1	0	2	5	4	2
rno-miR-138-5p	2	1	4	0	1	3
rno-miR-139-3p	6	4	5	5	4	3
rno-miR-139-5p	11	7	7	4	8	8
rno-miR-140-3p	17282	15496	21111	23983	22098	22329
rno-miR-140-5p	38	22	62	30	29	49
rno-miR-141-3p	0	0	0	0	0	0
rno-miR-141-5p	1	1	1	0	1	3
rno-miR-142-3p	0	0	0	0	0	0
rno-miR-142-5p	1	3	4	6	1	0
rno-miR-143-3p	75926	49580	60892	75244	88143	83139
rno-miR-143-5p	305	266	392	545	513	490
rno-miR-144-3p	0	1	4	0	0	0
rno-miR-144-5p	0	0	0	0	0	0
rno-miR-145-3p	1191	786	1137	1685	1717	1650
rno-miR-145-5p	7664	6738	11241	16434	13180	15609
rno-miR-146a-3p	13	4	16	0	0	0
rno-miR-146a-5p	3528	2789	3650	28	26	19
rno-miR-146b-3p	68	50	71	90	75	66
rno-miR-146b-5p	1859	1168	1450	1200	1393	1204
rno-miR-147	0	0	0	1	1	1
rno-miR-148a-3p	12706	9094	11787	10440	11378	10612
rno-miR-148a-5p	268	194	338	437	417	451
rno-miR-148b-3p	7324	5366	9036	6790	7279	7003
rno-miR-148b-5p	37	24	48	38	50	43
rno-miR-149-3p	21	39	18	13	9	20
rno-miR-149-5p	1422	1172	1547	1972	1621	1850
rno-miR-150-3p	8	3	9	9	7	1
rno-miR-150-5p	69	45	64	69	49	69
rno-miR-151-3p	9149	7868	8857	12779	10424	11417
rno-miR-151-5p	9	8	8	16	14	11
rno-miR-152-3p	17186	13569	15483	14215	15560	13160
rno-miR-152-5p	178	101	213	308	281	304
rno-miR-153-3p	0	0	0	0	0	0
rno-miR-153-5p	0	0	0	0	0	0
rno-miR-154-3p	0	0	1	5	4	0
rno-miR-154-5p	7	4	14	8	15	9
rno-miR-155-3p	0	0	0	0	0	0
rno-miR-155-5p	114	70	104	127	143	126
rno-miR-15a-3p	0	0	0	0	0	0
rno-miR-15a-5p	51	39	64	61	52	39
rno-miR-15b-3p	7	10	17	20	11	9
rno-miR-15b-5p	212	221	314	242	256	203
rno-miR-16-3p	0	0	1	3	2	0
rno-miR-16-5p	552	403	719	350	469	418
rno-miR-17-1-3p	20	26	47	41	34	32
rno-miR-17-2-3p	0	2	0	0	0	1
rno-miR-17-5p	626	571	736	930	986	669
rno-miR-181a-1-3p	480	394	400	779	755	702
rno-miR-181a-2-3p	1315	1056	1412	2125	1951	1652
rno-miR-181a-5p	35186	27259	42205	33284	32233	32257
rno-miR-181b-1-3p	0	4	0	6	1	8
rno-miR-181b-2-3p	0	0	0	0	0	0
rno-miR-181b-5p	11212	8964	12161	10968	11171	9958
rno-miR-181c-3p	29	26	56	76	49	45
rno-miR-181c-5p	161	144	236	184	181	166
rno-miR-181d-3p	8	5	2	1	5	5
rno-miR-181d-5p	896	634	983	748	762	697
rno-miR-182	31	16	26	40	30	20
rno-miR-183-3p	0	1	0	0	0	1
rno-miR-183-5p	19	10	13	20	17	22
rno-miR-1839-3p	2	2	1	5	6	1
rno-miR-1839-5p	229	162	236	211	231	215
rno-miR-184	29	27	21	14	33	29
rno-miR-1843a-3p	166	119	149	161	160	131
rno-miR-1843a-5p	182	122	157	185	187	144
rno-miR-1843b-3p	19	28	42	43	43	44
rno-miR-1843b-5p	32	28	34	28	31	43
rno-miR-185-3p	147	129	107	203	134	145
rno-miR-185-5p	436	389	465	479	497	433
rno-miR-186-3p	0	0	1	0	0	0
rno-miR-186-5p	800	651	915	700	823	618
rno-miR-187-3p	7	4	19	8	15	5
rno-miR-187-5p	13	6	11	17	13	22
rno-miR-188-3p	2	1	2	2	0	0
rno-miR-188-5p	1	2	3	0	0	4
rno-miR-1896	7	1	4	2	4	3
rno-miR-18a-3p	63	56	56	130	90	76
rno-miR-18a-5p	5	3	5	1	4	1
rno-miR-190a-3p	0	1	0	0	2	0
rno-miR-190a-5p	1	3	3	2	4	0
rno-miR-190b-3p	0	0	0	0	0	0
rno-miR-190b-5p	1	0	0	0	3	1
rno-miR-1912-3p	0	0	0	0	0	0
rno-miR-1912-5p	0	0	0	0	0	1
rno-miR-191a-3p	19	13	18	20	24	28
rno-miR-191a-5p	8539	7402	9261	11696	10985	10594
rno-miR-191b	13	10	13	18	24	29
rno-miR-192-3p	0	5	2	0	0	1
rno-miR-192-5p	113	82	105	101	94	81
rno-miR-193a-3p	5	3	3	2	4	3
rno-miR-193a-5p	55	53	79	108	83	96
rno-miR-193b-3p	187	148	217	232	190	213
rno-miR-193b-5p	26	24	19	49	34	42
rno-miR-194-3p	14	10	8	20	20	23
rno-miR-194-5p	75	65	74	46	43	50
rno-miR-1949	48	35	25	47	35	49
rno-miR-195-3p	14	14	9	18	10	34
rno-miR-195-5p	8	9	21	3	5	5
rno-miR-1956-3p	4	10	4	13	1	9
rno-miR-1956-5p	5	0	4	8	7	6
rno-miR-196a-3p	0	0	0	0	0	0
rno-miR-196a-5p	1	1	1	1	0	1
rno-miR-196b-3p	0	0	0	0	0	0
rno-miR-196b-5p	0	0	0	1	1	1
rno-miR-196c-3p	0	0	0	0	0	0
rno-miR-196c-5p	0	3	0	0	0	0
rno-miR-199a-3p	69114	53324	65557	45435	51234	43415
rno-miR-199a-5p	60471	48413	68500	63438	63823	67955
rno-miR-19a-3p	1	1	0	0	2	1
rno-miR-19a-5p	0	0	0	0	0	0
rno-miR-19b-1-5p	0	0	0	0	1	0
rno-miR-19b-2-5p	0	0	0	0	0	0
rno-miR-19b-3p	6	3	7	3	2	6
rno-miR-1b	0	4	1	0	3	3
rno-miR-200a-3p	0	0	1	0	0	0
rno-miR-200a-5p	0	0	1	0	0	0
rno-miR-200b-3p	11	4	4	0	1	1
rno-miR-200b-5p	0	0	0	0	0	0
rno-miR-200c-3p	29	9	25	30	28	25
rno-miR-200c-5p	0	0	0	0	0	0
rno-miR-201-3p	0	0	0	0	0	0
rno-miR-201-5p	0	1	0	1	0	0
rno-miR-202-3p	0	0	0	0	0	0
rno-miR-202-5p	1	0	0	0	0	0
rno-miR-203a-3p	3	3	0	2	2	0
rno-miR-203a-5p	0	0	0	0	0	0
rno-miR-203b-3p	1	0	0	0	0	3
rno-miR-203b-5p	2	3	2	2	5	1
rno-miR-204-3p	4	1	6	0	1	0
rno-miR-204-5p	42	27	18	30	14	14
rno-miR-205	30	29	37	51	25	37
rno-miR-206-3p	13	46	11	45	64	52
rno-miR-206-5p	0	0	1	0	0	0
rno-miR-207	4	3	10	3	5	4
rno-miR-208a-3p	0	0	0	0	0	0
rno-miR-208a-5p	0	1	0	0	0	0
rno-miR-208b-3p	0	0	0	0	0	0
rno-miR-208b-5p	0	0	0	0	0	0
rno-miR-20a-3p	3	4	2	0	0	0
rno-miR-20a-5p	147	155	166	147	193	158
rno-miR-20b-3p	1	0	0	0	0	0
rno-miR-20b-5p	0	0	0	0	1	0
rno-miR-21-3p	7	8	15	10	15	15
rno-miR-21-5p	59300	43247	57643	45060	57527	45412
rno-miR-210-3p	1250	1157	1084	411	432	380
rno-miR-210-5p	54	67	47	15	14	14
rno-miR-211-3p	2	1	0	0	2	0
rno-miR-211-5p	5	7	4	9	11	19
rno-miR-212-3p	31	19	25	32	41	25
rno-miR-212-5p	220	181	248	438	357	319
rno-miR-214-3p	19133	16746	23501	27679	23430	24972
rno-miR-214-5p	140	109	155	121	162	106
rno-miR-215	1	1	1	0	4	3
rno-miR-216a-3p	0	0	0	0	0	1
rno-miR-216a-5p	0	0	0	0	0	0
rno-miR-216b-3p	0	0	0	0	0	0
rno-miR-216b-5p	0	0	0	0	0	0
rno-miR-217-3p	0	0	0	0	0	0
rno-miR-217-5p	0	0	0	0	1	0
rno-miR-218a-1-3p	6	1	6	7	3	7
rno-miR-218a-2-3p	0	2	5	6	5	8
rno-miR-218a-5p	51	56	81	66	77	70
rno-miR-218b	10	10	22	17	17	15
rno-miR-219a-1-3p	45	15	43	68	68	87
rno-miR-219a-2-3p	2	3	7	0	2	2
rno-miR-219a-5p	12	12	11	9	10	12
rno-miR-219b	0	3	7	0	6	1
rno-miR-22-3p	4112	3036	3928	3357	3825	3315
rno-miR-22-5p	177	138	167	130	157	120
rno-miR-221-3p	7561	6686	8639	12179	13705	11024
rno-miR-221-5p	320	269	287	420	414	407
rno-miR-222-3p	11628	8954	10592	20678	17447	16458
rno-miR-222-5p	9	10	12	19	32	16
rno-miR-223-3p	2	2	1	0	1	0
rno-miR-223-5p	0	0	0	0	0	0
rno-miR-224-3p	5	4	2	9	5	5
rno-miR-224-5p	1571	1417	1530	1339	1587	1267
rno-miR-23a-3p	8219	7239	9414	8149	8275	7476
rno-miR-23a-5p	51	32	56	115	111	84
rno-miR-23b-3p	21620	17494	25447	26589	25733	24262
rno-miR-23b-5p	818	753	687	1644	1544	1822
rno-miR-24-1-5p	40	21	43	21	16	17
rno-miR-24-2-5p	440	309	471	380	370	359
rno-miR-24-3p	4064	3288	5135	4154	4385	3610
rno-miR-25-3p	2736	2387	3393	3188	3371	3037
rno-miR-25-5p	48	39	55	79	40	60
rno-miR-26a-3p	0	0	0	3	0	1
rno-miR-26a-5p	45495	28160	41292	33907	36173	34393
rno-miR-26b-3p	9	1	9	16	14	14
rno-miR-26b-5p	2229	2283	2133	1555	1873	1624
rno-miR-27a-3p	2782	2185	3580	2788	3001	2537
rno-miR-27a-5p	19	17	16	22	24	23
rno-miR-27b-3p	41803	31983	46434	42074	46630	41667
rno-miR-27b-5p	197	151	164	272	334	257
rno-miR-28-3p	2086	1851	2206	3416	2988	2867
rno-miR-28-5p	62	34	59	76	53	40
rno-miR-290	1	1	1	1	1	1
rno-miR-291a-3p	0	0	0	0	0	1
rno-miR-291a-5p	0	0	2	0	0	0
rno-miR-291b	0	0	0	0	0	2
rno-miR-292-3p	0	0	0	0	0	0
rno-miR-292-5p	0	0	0	7	0	0
rno-miR-293-3p	0	0	0	0	0	0
rno-miR-293-5p	0	0	0	0	0	0
rno-miR-294	0	0	0	0	0	0
rno-miR-295-3p	0	0	0	0	0	0
rno-miR-295-5p	1	0	0	0	0	0
rno-miR-296-3p	751	660	742	1355	1220	1143
rno-miR-296-5p	769	698	1400	2262	1654	1800
rno-miR-297	2	0	0	1	0	5
rno-miR-298-3p	83	80	93	108	114	87
rno-miR-298-5p	5545	4378	5671	9528	8297	7956
rno-miR-2985	0	1	0	1	0	0
rno-miR-299a-3p	28	19	40	45	46	50
rno-miR-299a-5p	11	4	13	13	9	14
rno-miR-299b-3p	9	13	10	14	8	19
rno-miR-299b-5p	39	27	38	40	54	42
rno-miR-29a-3p	998	807	1077	821	955	711
rno-miR-29a-5p	4	0	0	0	1	1
rno-miR-29b-1-5p	30	9	7	13	29	13
rno-miR-29b-3p	2	4	12	2	2	4
rno-miR-29b-5p	9	11	12	11	13	16
rno-miR-29c-3p	8	1	4	0	2	2
rno-miR-29c-5p	1	0	1	1	1	2
rno-miR-300-3p	393	307	533	633	564	526
rno-miR-300-5p	0	0	0	0	1	0
rno-miR-301a-3p	3	7	5	4	1	1
rno-miR-301a-5p	5	4	8	7	17	3
rno-miR-301b-3p	0	0	0	0	0	0
rno-miR-301b-5p	0	0	0	0	0	0
rno-miR-3064-3p	0	0	0	0	0	0
rno-miR-3064-5p	6	3	3	6	4	4
rno-miR-3065-3p	2	1	1	2	6	2
rno-miR-3065-5p	1	3	0	2	1	2
rno-miR-3068-3p	133	122	124	163	132	126
rno-miR-3068-5p	119	82	95	150	96	129
rno-miR-3072	33	37	47	75	50	61
rno-miR-3074	220	226	391	667	485	530
rno-miR-3075	6	0	4	3	1	6
rno-miR-3084a-1-5p	1	2	2	0	2	2
rno-miR-3084a-3p	12	17	9	11	7	11
rno-miR-3084a-5p	1	0	0	0	0	0
rno-miR-3084b-3p	1	0	2	0	0	0
rno-miR-3084b-5p	0	0	0	0	0	0
rno-miR-3085	0	0	0	0	0	0
rno-miR-3099	23	14	29	16	20	31
rno-miR-30a-3p	240	153	222	235	282	315
rno-miR-30a-5p	12132	8517	11836	14109	13641	12275
rno-miR-30b-3p	13	12	11	17	18	17
rno-miR-30b-5p	118	112	174	106	99	76
rno-miR-30c-1-3p	40	36	51	89	68	81
rno-miR-30c-2-3p	204	160	152	281	280	266
rno-miR-30c-5p	6397	5142	5865	5553	5263	4385
rno-miR-30d-3p	2	1	1	0	2	0
rno-miR-30d-5p	66103	55391	64066	105000	79430	82051
rno-miR-30e-3p	238	226	239	247	288	244
rno-miR-30e-5p	3292	2137	3295	2667	3186	2658
rno-miR-3102	294	203	315	582	439	435
rno-miR-3120	141	147	199	162	185	119
rno-miR-31a-3p	5	6	10	3	5	6
rno-miR-31a-5p	775	797	1189	917	969	812
rno-miR-31b	795	699	1109	912	1042	806
rno-miR-32-3p	2	2	0	9	7	4
rno-miR-32-5p	15	4	6	3	11	11
rno-miR-320-3p	51206	44863	46053	65321	52422	50539
rno-miR-320-5p	696	319	183	10	3	16
rno-miR-322-3p	3378	3007	3309	2698	2727	2535
rno-miR-322-5p	60	56	68	31	17	25
rno-miR-323-3p	200	193	185	294	263	246
rno-miR-323-5p	20	9	20	48	50	24
rno-miR-324-3p	557	413	684	670	481	575
rno-miR-324-5p	41	31	64	43	50	46
rno-miR-325-3p	0	1	0	1	0	0
rno-miR-325-5p	0	3	0	2	7	2
rno-miR-326-3p	24	14	19	29	7	10
rno-miR-326-5p	4	0	1	3	1	0
rno-miR-327	2	1	0	2	0	0
rno-miR-328a-3p	20817	16935	20547	28062	20676	23287
rno-miR-328a-5p	5	1	9	28	13	23
rno-miR-328b-3p	8	2	3	7	10	3
rno-miR-329-3p	90	74	81	97	107	107
rno-miR-329-5p	57	37	56	59	76	68
rno-miR-33-3p	2	0	0	1	0	0
rno-miR-33-5p	5	2	1	5	1	2
rno-miR-330-3p	457	428	474	793	634	636
rno-miR-330-5p	58	56	98	87	68	76
rno-miR-331-3p	190	160	244	344	259	333
rno-miR-331-5p	12	10	16	8	6	10
rno-miR-335	39	15	60	21	33	24
rno-miR-336-3p	0	3	1	0	0	0
rno-miR-336-5p	0	0	0	0	0	0
rno-miR-337-3p	6	5	3	6	4	8
rno-miR-337-5p	132	101	157	154	143	118
rno-miR-338-3p	2	4	1	0	2	3
rno-miR-338-5p	0	3	1	1	2	4
rno-miR-339-3p	132	82	124	150	127	119
rno-miR-339-5p	2469	2508	3779	4049	2992	2905
rno-miR-340-3p	9	10	21	16	21	16
rno-miR-340-5p	421	301	475	403	569	359
rno-miR-341	644	520	851	907	941	1000
rno-miR-342-3p	705	603	834	1033	809	856
rno-miR-342-5p	225	187	207	522	454	440
rno-miR-343	4	1	1	0	0	0
rno-miR-344a-3p	4	2	4	3	2	0
rno-miR-344a-5p	2	0	2	0	0	0
rno-miR-344b-1-3p	0	0	0	1	1	0
rno-miR-344b-3p	1	0	0	0	0	0
rno-miR-344b-5p	0	0	0	0	0	0
rno-miR-344g	2	5	2	5	3	2
rno-miR-344i	0	0	0	0	0	0
rno-miR-345-3p	94	72	63	114	85	75
rno-miR-345-5p	31	21	49	45	29	21
rno-miR-346	20	9	11	26	13	8
rno-miR-347	1	7	2	1	0	0
rno-miR-3473	424	316	191	587	498	532
rno-miR-349	2	0	2	0	2	0
rno-miR-34a-3p	0	1	0	0	0	0
rno-miR-34a-5p	181	165	208	102	156	90
rno-miR-34b-3p	286	250	399	479	437	417
rno-miR-34b-5p	1	3	7	4	4	2
rno-miR-34c-3p	51	41	53	60	47	60
rno-miR-34c-5p	345	281	489	335	415	367
rno-miR-350	9	11	13	20	4	11
rno-miR-351-3p	787	709	695	1348	1072	1143
rno-miR-351-5p	30861	27767	26205	36451	29273	30802
rno-miR-352	8	2	1	5	5	4
rno-miR-3541	26	24	27	24	30	30
rno-miR-3542	1	0	4	2	0	3
rno-miR-3543	2874	2491	3125	4150	3782	3848
rno-miR-3544	129	96	144	156	172	140
rno-miR-3546	0	0	0	0	0	0
rno-miR-3547	1	3	7	0	0	0
rno-miR-3548	0	1	1	1	0	0
rno-miR-3549	82	49	86	93	80	97
rno-miR-3550	2	0	0	2	0	0
rno-miR-3551-3p	0	0	0	0	0	0
rno-miR-3551-5p	0	0	0	0	0	0
rno-miR-3552	2	2	3	0	0	1
rno-miR-3553	16	6	11	22	19	9
rno-miR-3556a	1007	743	1202	796	931	733
rno-miR-3556b	5	3	4	2	2	2
rno-miR-3557-3p	41	35	63	61	32	49
rno-miR-3557-5p	1190	936	1217	1311	1315	1251
rno-miR-3558-3p	4	3	17	6	2	5
rno-miR-3558-5p	0	2	0	3	0	3
rno-miR-3559-3p	6	7	6	16	18	12
rno-miR-3559-5p	9	7	15	8	22	8
rno-miR-3560	228	212	260	555	399	391
rno-miR-3561-3p	0	0	0	0	1	0
rno-miR-3561-5p	3	0	0	1	0	1
rno-miR-3562	3	3	1	1	8	4
rno-miR-3564	0	5	3	4	1	3
rno-miR-3566	0	1	0	0	0	0
rno-miR-3568	3	2	2	1	0	2
rno-miR-3569	1	0	2	0	1	2
rno-miR-3570	505	366	409	776	787	654
rno-miR-3571	0	0	0	0	0	0
rno-miR-3572	2	9	4	6	13	7
rno-miR-3573-3p	6	0	3	2	1	1
rno-miR-3573-5p	0	4	2	0	0	2
rno-miR-3574	1235	1127	1045	406	420	343
rno-miR-3575	0	0	0	0	0	0
rno-miR-3576	6	7	7	1	11	6
rno-miR-3577	57	40	46	54	48	28
rno-miR-3578	86	63	72	75	96	64
rno-miR-3579	14	4	15	12	14	8
rno-miR-3580-3p	0	0	0	0	0	0
rno-miR-3580-5p	0	0	0	0	0	0
rno-miR-3583-3p	1	1	3	3	0	9
rno-miR-3583-5p	0	0	0	0	0	0
rno-miR-3584-3p	20	16	15	1	0	0
rno-miR-3584-5p	5	1	7	7	1	8
rno-miR-3585-3p	1	1	1	0	0	0
rno-miR-3585-5p	1	0	0	3	0	4
rno-miR-3586-3p	19	6	10	15	10	11
rno-miR-3586-5p	9234	7835	8726	12812	10784	11388
rno-miR-3587	3	4	1	1	1	1
rno-miR-3588	137564	131594	130002	209779	157881	165660
rno-miR-3589	647	538	893	935	907	844
rno-miR-3590-3p	1	1	0	0	0	1
rno-miR-3590-5p	19	13	28	24	17	13
rno-miR-3592	57	37	43	48	52	49
rno-miR-3593-3p	3	2	1	3	0	2
rno-miR-3593-5p	0	0	0	0	0	0
rno-miR-3594-3p	17	10	20	28	20	31
rno-miR-3594-5p	1	11	11	5	8	3
rno-miR-3595	1	1	0	0	0	1
rno-miR-3596a	38523	29353	41366	38375	42189	38565
rno-miR-3596b	30486	23294	33804	31654	35813	32340
rno-miR-3596c	14008	10948	14724	18193	20359	18352
rno-miR-3596d	6930	4940	6816	6110	7037	6076
rno-miR-361-3p	968	815	937	1555	1248	1282
rno-miR-361-5p	137	139	137	165	135	115
rno-miR-362-3p	11	6	7	9	3	8
rno-miR-362-5p	48	39	52	72	65	81
rno-miR-363-3p	0	0	0	0	2	0
rno-miR-363-5p	0	2	0	0	0	0
rno-miR-365-3p	504	409	690	698	621	649
rno-miR-365-5p	368	312	300	1527	1332	1294
rno-miR-369-3p	7	16	12	9	7	14
rno-miR-369-5p	82	81	89	70	91	57
rno-miR-370-3p	1059	868	1301	2281	1904	2047
rno-miR-370-5p	7	4	21	13	20	28
rno-miR-374-3p	2	3	1	2	3	1
rno-miR-374-5p	304	256	277	203	261	197
rno-miR-375-3p	3	0	1	1	0	2
rno-miR-375-5p	1	0	3	0	0	0
rno-miR-376a-3p	1	0	2	0	0	1
rno-miR-376a-5p	2	1	3	1	0	3
rno-miR-376b-3p	17	22	18	14	10	14
rno-miR-376b-5p	0	0	0	2	0	1
rno-miR-376c-3p	9	9	6	7	6	10
rno-miR-376c-5p	0	0	0	0	0	0
rno-miR-377-3p	11	1	7	5	4	0
rno-miR-377-5p	33	20	40	57	40	70
rno-miR-378a-3p	1215	895	1246	1250	1333	1274
rno-miR-378a-5p	44	40	64	50	28	40
rno-miR-378b	29	26	38	15	24	37
rno-miR-379-3p	63	75	56	66	72	65
rno-miR-379-5p	1971	1496	1753	1816	2021	1735
rno-miR-380-3p	16	7	17	7	14	13
rno-miR-380-5p	12	3	10	9	14	13
rno-miR-381-3p	9	7	9	5	4	8
rno-miR-381-5p	0	0	0	0	0	0
rno-miR-382-3p	63	40	44	43	38	46
rno-miR-382-5p	1226	1051	1343	1348	1529	1370
rno-miR-383-3p	4	0	0	3	2	0
rno-miR-383-5p	100	66	110	85	100	81
rno-miR-384-3p	3	2	0	2	0	0
rno-miR-384-5p	2	0	2	0	2	2
rno-miR-409a-3p	1245	1049	1264	2645	2331	2382
rno-miR-409a-5p	204	180	287	396	336	337
rno-miR-409b	1243	1077	1273	2630	2290	2387
rno-miR-410-3p	241	242	293	411	340	443
rno-miR-410-5p	0	3	3	7	5	15
rno-miR-411-3p	170	170	150	162	191	164
rno-miR-411-5p	615	404	679	490	557	466
rno-miR-412-3p	27	25	28	61	32	39
rno-miR-412-5p	14	15	20	25	24	26
rno-miR-421-3p	472	338	575	798	589	697
rno-miR-421-5p	0	2	1	0	0	1
rno-miR-423-3p	8239	7542	7819	13443	10467	12319
rno-miR-423-5p	17113	14369	15000	30830	26177	25362
rno-miR-425-3p	25	15	19	30	18	31
rno-miR-425-5p	77	87	123	127	131	124
rno-miR-429	0	2	0	0	0	0
rno-miR-431	112	115	146	176	145	118
rno-miR-433-3p	5639	5402	5382	11560	9059	8816
rno-miR-433-5p	2	0	0	0	0	1
rno-miR-434-3p	2970	2411	3156	4117	3804	3714
rno-miR-434-5p	60	52	66	96	89	102
rno-miR-448-3p	0	0	2	1	1	1
rno-miR-448-5p	0	2	1	0	0	0
rno-miR-449a-3p	0	0	0	0	0	1
rno-miR-449a-5p	10	7	3	9	10	2
rno-miR-449c-3p	0	0	0	0	0	0
rno-miR-449c-5p	0	0	2	5	3	3
rno-miR-450a-3p	10	15	11	19	13	5
rno-miR-450a-5p	161	172	172	110	128	106
rno-miR-450b-3p	498	406	501	495	503	400
rno-miR-450b-5p	164	118	178	60	123	107
rno-miR-451-3p	1	0	0	0	1	0
rno-miR-451-5p	1	0	3	8	3	0
rno-miR-452-3p	7	4	9	2	3	11
rno-miR-452-5p	86	78	89	101	108	75
rno-miR-455-3p	36083	29858	40367	45310	33552	37416
rno-miR-455-5p	50	42	66	53	32	43
rno-miR-463-3p	0	0	0	0	0	0
rno-miR-463-5p	0	0	0	0	0	0
rno-miR-465-3p	0	0	0	0	0	0
rno-miR-465-5p	0	0	0	0	0	1
rno-miR-466b-2-3p	33	18	31	54	45	35
rno-miR-466b-3p	780	617	446	921	671	596
rno-miR-466b-4-3p	46	29	27	44	51	43
rno-miR-466b-5p	97	57	64	99	121	75
rno-miR-466c-3p	51	38	40	84	73	74
rno-miR-466c-5p	287	270	268	444	484	368
rno-miR-466d	0	0	4	2	3	1
rno-miR-471-3p	0	0	0	0	0	0
rno-miR-471-5p	0	0	0	0	0	0
rno-miR-483-3p	16	10	15	45	37	25
rno-miR-483-5p	15	12	26	47	31	42
rno-miR-484	730	686	1001	1537	1414	1231
rno-miR-485-3p	2862	2428	3527	7618	5979	6028
rno-miR-485-5p	642	598	504	1028	974	910
rno-miR-486	25	18	41	67	30	31
rno-miR-487b-3p	73	80	129	74	118	90
rno-miR-487b-5p	2	5	5	23	26	42
rno-miR-488-3p	0	4	1	6	0	2
rno-miR-488-5p	0	0	0	0	0	0
rno-miR-489-3p	0	0	0	0	0	0
rno-miR-489-5p	5	0	2	0	0	0
rno-miR-490-3p	34	42	48	100	61	95
rno-miR-490-5p	2	6	7	8	6	7
rno-miR-493-3p	25	31	20	39	26	17
rno-miR-493-5p	445	348	472	551	634	502
rno-miR-494-3p	396	338	453	647	595	575
rno-miR-494-5p	28	21	21	35	40	30
rno-miR-495	54	48	52	53	61	42
rno-miR-496-3p	20	28	40	27	39	23
rno-miR-496-5p	0	0	0	2	1	4
rno-miR-497-3p	1	5	1	7	4	7
rno-miR-497-5p	73	41	51	31	38	25
rno-miR-499-3p	0	0	1	0	0	0
rno-miR-499-5p	60	54	77	42	53	39
rno-miR-500-3p	25	17	34	21	37	21
rno-miR-500-5p	0	0	0	0	3	0
rno-miR-501-3p	193	199	254	569	424	377
rno-miR-501-5p	1	2	5	6	1	3
rno-miR-503-3p	1641	1365	1316	1294	1145	1210
rno-miR-503-5p	180	129	145	76	100	96
rno-miR-504	2390	1872	1991	3719	2682	2993
rno-miR-505-3p	661	507	854	932	964	777
rno-miR-505-5p	67	53	97	133	114	93
rno-miR-509-3p	2	0	0	0	0	0
rno-miR-509-5p	0	0	0	0	0	0
rno-miR-511-3p	0	0	0	0	0	0
rno-miR-511-5p	0	0	0	1	0	0
rno-miR-5132-3p	2	1	5	10	1	3
rno-miR-5132-5p	10	9	12	12	4	6
rno-miR-532-3p	377	368	570	658	521	527
rno-miR-532-5p	48	34	59	64	41	41
rno-miR-539-3p	0	1	4	1	0	0
rno-miR-539-5p	5	6	5	1	6	4
rno-miR-540-3p	202	124	231	275	306	292
rno-miR-540-5p	4	4	7	3	4	4
rno-miR-541-3p	1	0	5	1	6	3
rno-miR-541-5p	2309	1859	2711	3346	3493	3184
rno-miR-542-3p	525	387	416	329	429	385
rno-miR-542-5p	49	24	51	31	35	23
rno-miR-543-3p	777	709	995	1306	1205	1203
rno-miR-543-5p	14	8	15	18	23	13
rno-miR-544-3p	0	0	0	0	0	0
rno-miR-544-5p	0	0	0	0	0	0
rno-miR-547-3p	0	0	0	0	1	0
rno-miR-547-5p	0	0	0	0	0	0
rno-miR-551b-3p	0	0	1	0	0	0
rno-miR-551b-5p	0	0	0	1	0	0
rno-miR-568	0	0	1	0	0	0
rno-miR-582-3p	2	4	4	17	8	3
rno-miR-582-5p	3	0	4	1	0	1
rno-miR-592	0	0	0	0	0	0
rno-miR-598-3p	243	222	303	272	260	232
rno-miR-598-5p	3	0	2	3	2	3
rno-miR-615	54	40	32	16	5	27
rno-miR-6215	5	3	3	0	0	3
rno-miR-6216	2	1	0	4	2	0
rno-miR-628	0	0	0	0	0	0
rno-miR-6314	0	0	2	0	0	0
rno-miR-6315	4	2	4	1	0	1
rno-miR-6316	2	0	0	0	0	0
rno-miR-6317	2	0	0	0	1	0
rno-miR-6318	19	14	18	23	24	32
rno-miR-6319	11	7	13	32	21	20
rno-miR-632	7	3	4	7	10	6
rno-miR-6320	0	10	0	0	0	2
rno-miR-6321	0	3	0	1	0	0
rno-miR-6322	0	0	0	0	0	0
rno-miR-6323	0	0	0	1	0	1
rno-miR-6324	105	60	114	116	94	88
rno-miR-6325	0	0	1	0	0	0
rno-miR-6326	0	0	0	0	0	0
rno-miR-6327	0	0	0	1	1	0
rno-miR-6328	50	35	56	128	92	127
rno-miR-6329	5	2	3	3	5	0
rno-miR-6330	0	0	0	0	0	0
rno-miR-6331	49	44	45	39	42	59
rno-miR-6332	2	0	2	2	1	1
rno-miR-6333	2	2	1	0	0	0
rno-miR-6334	2	0	2	0	0	2
rno-miR-652-3p	780	779	1155	1226	1119	1170
rno-miR-652-5p	2	3	3	4	0	3
rno-miR-653-3p	0	0	0	0	0	0
rno-miR-653-5p	0	0	0	0	0	0
rno-miR-664-1-5p	0	0	0	0	0	0
rno-miR-664-2-5p	184	146	137	248	181	204
rno-miR-664-3p	57	52	20	73	40	49
rno-miR-665	28	29	68	114	73	62
rno-miR-666-3p	2	2	2	2	1	0
rno-miR-666-5p	55	69	54	124	101	92
rno-miR-667-3p	264	255	303	702	457	566
rno-miR-667-5p	12	17	12	55	53	48
rno-miR-668	645	588	637	831	666	691
rno-miR-671	1351	1169	1687	3301	2507	2810
rno-miR-672-3p	1	0	1	5	3	4
rno-miR-672-5p	82	60	88	120	104	84
rno-miR-673-3p	15	15	32	39	31	37
rno-miR-673-5p	60	68	61	55	82	61
rno-miR-674-3p	504	483	509	727	635	677
rno-miR-674-5p	88	100	154	153	163	146
rno-miR-675-3p	8	11	10	5	3	2
rno-miR-675-5p	6	6	7	3	2	1
rno-miR-676	1457	1151	1761	1816	1954	1931
rno-miR-678	2	2	1	0	0	1
rno-miR-679	0	0	0	0	0	0
rno-miR-702-3p	873	751	776	1523	1167	1377
rno-miR-702-5p	43	29	9	154	143	133
rno-miR-708-3p	51	25	53	12	18	18
rno-miR-708-5p	81	69	116	25	33	31
rno-miR-709	24	14	4	40	31	23
rno-miR-711	1	1	1	0	1	0
rno-miR-741-3p	0	0	0	0	0	0
rno-miR-741-5p	0	0	0	0	0	0
rno-miR-742-3p	0	0	0	0	0	0
rno-miR-742-5p	0	0	0	0	0	0
rno-miR-743a-3p	0	0	0	0	0	0
rno-miR-743a-5p	0	0	0	0	0	0
rno-miR-743b-3p	0	0	0	1	0	0
rno-miR-743b-5p	0	0	0	0	0	0
rno-miR-7578	0	0	0	0	0	0
rno-miR-758-3p	16	5	6	10	12	4
rno-miR-758-5p	0	0	0	0	0	0
rno-miR-759	0	0	0	0	0	0
rno-miR-760-3p	715	526	571	1575	1245	1340
rno-miR-760-5p	4	2	6	1	2	0
rno-miR-761	3	2	3	2	0	2
rno-miR-762	1	0	0	4	0	0
rno-miR-764-3p	0	0	0	0	0	0
rno-miR-764-5p	0	2	0	0	0	0
rno-miR-770-3p	850	624	977	2009	1536	1770
rno-miR-770-5p	14	17	14	27	33	28
rno-miR-7a-1-3p	6	0	1	7	3	4
rno-miR-7a-2-3p	0	1	2	0	0	0
rno-miR-7a-5p	175	130	299	421	489	434
rno-miR-7b	0	0	0	3	1	0
rno-miR-802-3p	0	0	1	0	3	1
rno-miR-802-5p	0	0	0	0	0	0
rno-miR-871-3p	1	1	1	2	1	0
rno-miR-871-5p	0	0	1	0	0	0
rno-miR-872-3p	75	53	86	109	99	92
rno-miR-872-5p	52	19	49	24	30	32
rno-miR-873-3p	2	1	0	2	2	4
rno-miR-873-5p	0	1	2	0	0	0
rno-miR-874-3p	145	108	252	227	175	212
rno-miR-874-5p	1	2	2	4	1	1
rno-miR-875	0	0	0	0	0	0
rno-miR-876	0	0	0	1	0	0
rno-miR-877	150	139	175	585	520	438
rno-miR-878	1	0	0	0	0	0
rno-miR-879-3p	0	1	0	0	0	0
rno-miR-879-5p	0	0	1	1	0	3
rno-miR-880-3p	0	0	0	0	0	0
rno-miR-880-5p	0	0	0	0	0	0
rno-miR-881-3p	0	0	0	0	0	0
rno-miR-881-5p	0	0	0	1	0	0
rno-miR-883-3p	0	0	0	0	0	0
rno-miR-883-5p	0	0	0	0	0	0
rno-miR-92a-1-5p	10	7	14	82	70	95
rno-miR-92a-2-5p	0	0	0	0	0	0
rno-miR-92a-3p	11183	10527	14223	23874	20318	21699
rno-miR-92b-3p	259	159	239	574	392	415
rno-miR-92b-5p	5	2	3	5	9	9
rno-miR-93-3p	17	20	20	27	23	18
rno-miR-93-5p	634	591	777	817	911	734
rno-miR-935	6	6	2	7	8	4
rno-miR-96-3p	0	0	0	0	0	0
rno-miR-96-5p	0	0	0	0	2	0
rno-miR-98-3p	6	5	8	4	7	4
rno-miR-98-5p	638	474	715	639	793	675
rno-miR-99a-3p	4	3	5	2	2	5
rno-miR-99a-5p	13942	11898	18080	15605	14294	14553
rno-miR-99b-3p	1471	1179	1632	2693	2472	2513
rno-miR-99b-5p	118269	91979	98991	190144	151317	165491
rno-miR-9a-3p	0	0	0	0	0	0
rno-miR-9a-5p	3	8	16	8	15	10
rno-miR-9b-3p	11	8	15	14	18	10
rno-miR-9b-5p	1	2	0	1	1	0
