# Supplementary material for: Dental Follicle Mesenchymal Stem Cell-Derived Exosomes Mitigate Temporomandibular Joint Osteoarthritis in an In Vitro Model via the miR-146a-5p/Traf6/NF-κB Axis
Source: Research Square preprint supplement (doi:10.21203/rs.3.rs-8341412/v1), 2025-12-19
Supplement: Supplementary file 6 [file 58c5a9dfb5a5ebcb886eddac.docx]

Supplementary Table 1 Detailed Information about the Antibodies Used in This Study

| **Target Protein** | **Manufacturer** | **Cat No** | **Dilution** |
| --- | --- | --- | --- |
| Gapdh | Zenbio | 200306-7E4 | 1-5000 |
| Mmp9 | Abcam | ab228402 | 1-100 |
| Mmp13 | Affinty | AF5355 | 1-500 |
| Sox9 | Abcam | ab185966 | 1-1000 |
| Cox2 | Abcam | ab179800 | 1-1000 |
| Aggrecan | Abcam | ab3778 | 1-1000 |
| Col2a1 | Abcam | ab307674 | 1-1000 |
| p65 | Abcam | AB32536 | 1-1000 |
| p-p65 | Zenbio | R310013 | 1-500 |
| HSP90 | Bioss | 51215M | 1-500 |
| TSG101 | Proteintech | 28283-1-AP | 1-1000 |
| CD9 | Zenbio | R380441 | 1-500 |
| CD81 | Zenbio | R23866 | 1-500 |
