# Supplementary material for: Dental Follicle Mesenchymal Stem Cell-Derived Exosomes Mitigate Temporomandibular Joint Osteoarthritis in an In Vitro Model via the miR-146a-5p/Traf6/NF-κB Axis
Source: Research Square preprint supplement (doi:10.21203/rs.3.rs-8341412/v1), 2025-12-19
Supplement: Supplementary file 7 [file 9f4a2795cc7cec33dcd1a209.xlsx]

## Sheet: Model vs Control
ID	Description	setSize	enrichmentScore	NES	pvalue	p.adjust	qvalue	rank	leading_edge	core_enrichment	core_enrichment_symbol
rno03008	Ribosome biogenesis in eukaryotes	153	-0.560202	-2.48852	1e-10	4.77143e-09	3.03759e-09	3396	tags=53%, list=20%, signal=43%	362426/362593/316317/688637/308789/360574/120101968/120102558/120095374/120101109/120101120/120101131/120101142/120101153/120101164/120101175/120101316/120101382/120101393/120102569/120102580/120102591/120102602/120102761/691534/102238592/305506/291987/310512/300092/362229/291571/100034253/291061/296219/288564/312182/363563/292747/317579/290556/292831/308653/362703/84509/315045/114300/303456/3112…	Bms1/Gnl2/Imp4/Wdr36/Efl1/Utp6/LOC120101968/LOC120102558/LOC120095374/LOC120101109/LOC120101120/LOC120101131/LOC120101142/LOC120101153/LOC120101164/LOC120101175/LOC120101316/LOC120101382/LOC120101393/LOC120102569/LOC120102580/LOC120102591/LOC120102602/LOC120102761/Nop10/Ak6/Eif6/Utp4/Nmd3/Snu13/Xrn2/Tcof1/Gnl3l/Riok1/Nxt1/Pop7/Rbm28/Fbll1/Fbl/Utp14a/Gnl3/Pop4/Nxf2/Wdr43/Ran/Pop1/Gtpbp4/Utp18/Nat1…
rno03030	DNA replication	35	-0.683931	-2.29275	3.45985e-07	4.44458e-06	2.82952e-06	2635	tags=63%, list=15%, signal=53%	288414/298098/289758/309762/85241/59102/287524/304528/116468/246327/81513/299112/25737/59294/288532/312538/29728/85242/304573/291885/316273/29685	Rfc3/Pole3/Pold2/Dna2/Pola1/Rpa2/Rpa1/Rfc5/Rfc2/Prim1/Lig1/Pole2/Pcna/Pold1/Mcm7/Mcm2/Mcm4/Pola2/Pole/Mcm5/Mcm3/Mcm6
rno03013	Nucleocytoplasmic transport	100	-0.534825	-2.18141	1.2282e-08	2.73479e-07	1.74103e-07	6197	tags=71%, list=36%, signal=46%	81738/362281/59303/315352/25573/171361/290519/304862/683983/316108/114612/65274/25281/287113/304817/311182/79227/361055/24917/294429/313449/305884/684558/286917/295284/362607/308939/290228/295692/360886/113975/310512/305714/116555/368070/679894/291797/290280/362557/245922/314879/296219/366790/686774/296634/117021/24799/292085/116458/366016/308653/688288/690585/362273/291874/84509/361959/300259/36…	Nup98/Rae1/Tmem33/Nxt2/Ube2i/Eef1a1/Thoc3/Tpr/Nup43/Snupn/Ddx39b/Nup62/Nup153/Rnps1/Ipo9/Nup160/Thoc6/Kpna3/Kpnb1/Ranbp2/Upf3b/Acin1/Upf1/Phax/Rbm8a/Kpna6/Ipo7/Ipo4/Nup35/Ahctf1/Pom121/Nmd3/Thoc7/Nup107/Pnn/Thoc2l/Thoc1/Xpo4/Ndc1/Nup58/Xpot/Nxt1/Pym1/Ipo8/Nup214/Nup155/Eef1a2/Nup133/Ipo13/Nup188/Nxf2/Eif4a3/Alyref/Cse1l/Nup93/Ran/Kpna4/Aaas/Nup205/Sec13/LOC120095693/Ncbp1/Rangap1/Nup85/Xpo5/Magoh…
rno04110	Cell cycle	153	-0.484611	-2.15273	6.65505e-10	2.22279e-08	1.41507e-08	4763	tags=54%, list=27%, signal=39%	301430/246284/25577/494444/29486/314949/307511/311412/114483/314642/84576/94201/362817/305343/316767/287101/171102/309179/288671/24672/363174/81809/54238/29357/56011/308768/100360427/361195/691979/360643/291105/287280/361178/100362453/362356/300711/116651/363088/54237/296137/680111/25717/64193/171150/24577/362485/311327/312046/84577/361662/300121/360908/297176/360748/140583/171576/25203/25737/315…	Orc2/Atrx/Ywhaq/Cdkn2d/Smc3/Rad21/Cdc25c/Anapc1/Cdk6/Fzr1/Hdac1l/Cdk4/Cdk2/Pds5a/Ddx11/Pkmyt1/Cdc25a/Ppp2r5b/Anapc5/Ppp2ca/Sgo1/Tgfb2/Cdkn2c/Smad2/Ywhab/Ticrr/E2f4/Cdc14b/Esco2/Cdc27/E2f3/Skp1/Tfdp1/Ppp2cal1/Cul1/Atm/E2f5/Ccnb2/Cdk1/Bub1/Rbl1/Tgfb3/Pttg1/Cdk7/Myc/Ccne2/Knl1/Dbf4/Hdac2/Bub3/Smc1b/Cdc7/Mad2l1/Prkdc/Chek1/Bub1b/Ccnb1/Pcna/Espl1/Mcm7/Cdca5/Mad1l1/Wee1/Atr/Ccna2/Orc6/Ttk/Trip13/Ndc80/…
rno03410	Base excision repair	45	-0.497508	-1.80579	0.00215403	0.0105801	0.00673552	2635	tags=38%, list=15%, signal=32%	288414/298098/81528/289758/25459/79116/114521/304528/116468/81513/299112/497907/25737/304577/59294/304573/108348989	Rfc3/Pole3/Ogg1/Pold2/Hmgb1/Apex1/Tdg/Rfc5/Rfc2/Lig1/Pole2/Hmgb1l5/Pcna/Ung/Pold1/Pole/Hmgb1l1
rno03440	Homologous recombination	41	-0.486009	-1.7321	0.00243191	0.0114403	0.00728311	5578	tags=66%, list=32%, signal=45%	308755/100362927/54304/293144/500679/499966/296883/290631/293678/362704/64046/291787/103692848/300711/289758/315969/59102/287524/64557/313063/497976/59294/497672/298429/499870/360588/287634	Blm/Rpa3l1/Ssbp1/Pold3/Rad51b/Xrcc2/Rpa3/Babam1/Mus81/Babam2/Mre11/Rbbp8/Brcc3dc/Atm/Pold2/Topbp1/Rpa2/Rpa1/Bard1/Rad54b/Rad51c/Pold1/Brca1/Rad54l/Rad51/Brip1/Eme1
rno03460	Fanconi anemia pathway	47	-0.476434	-1.72924	0.00237937	0.011353	0.00722755	5768	tags=62%, list=33%, signal=41%	302953/305600/691105/292673/502320/308755/100362927/100360594/363164/296883/302982/309256/293678/316344/81685/312641/360847/501552/59102/287524/497976/313387/497672/499870/685055/360588/287634/361435/497856	Slx4/Fancl/Fancg/Ercc1/Faap24/Blm/Rpa3l1/Fanci/Wdr48/Rpa3/Eme2/Fan1/Mus81/Rev1/Mlh1/Fancd2/Ube2t/Fancb/Rpa2/Rpa1/Rad51c/Usp1/Brca1/Rad51/Atr/Brip1/Eme1/Fanca/Rmi2
rno03430	Mismatch repair	22	-0.558192	-1.68496	0.00567236	0.0228261	0.0145316	5644	tags=77%, list=33%, signal=52%	314320/100360342/100362927/54304/293144/296883/81685/288414/289758/59102/287524/304528/116468/81513/25737/59294/305000	Mlh3/Msh6/Rpa3l1/Ssbp1/Pold3/Rpa3/Mlh1/Rfc3/Pold2/Rpa2/Rpa1/Rfc5/Rfc2/Lig1/Pcna/Pold1/Exo1
rno03020	RNA polymerase	30	-0.502046	-1.63721	0.00895277	0.0328596	0.0209191	4612	tags=53%, list=27%, signal=39%	100361574/361102/363633/313245/361365/289561/362728/680493/361640/364834/362858/366277/306012/83503/83582/83581	Polr2k/Polr3a/Polr2a/Polr1e/Polr2c/Polr2b/Polr1f/Polr1g/Polr3e/Polr2d/Polr3b/Polr3k/Polr3d/Polr2f/Polr1b/Polr1a
rno00970	Aminoacyl-tRNA biosynthesis	41	-0.4593	-1.63691	0.00592594	0.0235627	0.0150005	4766	tags=51%, list=27%, signal=37%	299851/293638/361184/301254/291556/292759/292023/291624/287191/307492/297113/289352/313429/288917/306804/313047/314442/360821/294810/301544/309911	Mars1/Cars1/Cars2/Aars2/Nars1/Sars2/Aars1/Lars1/Rars1/Hars1/Gars1/Eprs1/Pars2/Farsa/Iars1/Yars1/Wars1/Gatc/Tars1/Farsb/Qrsl1
rno03420	Nucleotide excision repair	57	-0.418198	-1.58127	0.00500796	0.0214443	0.0136519	5624	tags=56%, list=32%, signal=38%	292673/100362927/64470/293144/361181/291703/84593/361381/100361574/296883/362385/363633/361365/289561/288414/298098/310071/298012/289758/364834/59102/171150/287524/304528/116468/81513/299112/308415/25737/59294/83503/304573	Ercc1/Rpa3l1/Ddb1/Pold3/Cul4a/Ercc3/Cetn2/Rad23a/Polr2k/Rpa3/Pole4/Polr2a/Polr2c/Polr2b/Rfc3/Pole3/Ercc8/Rad23b/Pold2/Polr2d/Rpa2/Cdk7/Rpa1/Rfc5/Rfc2/Lig1/Pole2/Ercc2/Pcna/Pold1/Polr2f/Pole
rno00020	Citrate cycle (TCA cycle)	28	-0.484502	-1.53739	0.0177598	0.0570362	0.0363105	4797	tags=57%, list=28%, signal=41%	170587/298942/361071/289217/24551/79250/114096/299201/360975/81654/361596/289950/50655/362404/81829/361042	Cs/Dld/Sucla2/Sdhc/Mdh1/Aco2/Idh3a/Dlst/Ogdh/Dlat/Idh2/Pdhb/Aco1/Suclg2/Mdh2/Pck2
rno04392	Hippo signaling pathway - multiple species	27	-0.470536	-1.47912	0.0245609	0.073904	0.0470489	2415	tags=37%, list=14%, signal=32%	316101/29431/311437/25744/361630/85265/305251/362423/683522/303039	Limd1/Pak1/Rassf2/Nf2/Tead1/Ajuba/Rassf6/Rassf4/Tead4/Wwc1
rno03060	Protein export	29	-0.455781	-1.45493	0.0341158	0.0949555	0.0604507	4406	tags=41%, list=25%, signal=31%	315548/298068/691145/291963/80843/290555/296076/288518/288919/293142/317409/100360464	Srpra/Sec61b/Immp1l/Tmem208/Sec61a1/Spcs1/Srp14/Get4/Get3/Spcs2/Arxes1/Arxes2
rno00900	Terpenoid backbone biosynthesis	24	-0.475657	-1.451	0.0402332	0.105397	0.067098	2344	tags=38%, list=14%, signal=32%	29637/83791/502143/313564/25675/365096/100364990/308100/89784	Hmgcs1/Fdps/Idi2/Zmpste24/Hmgcr/Acat2l1/Pdss1/Acat2/Idi1
rno01212	Fatty acid metabolism	59	-0.37101	-1.42009	0.0187342	0.0595925	0.0379378	1930	tags=20%, list=11%, signal=18%	114024/25541/60581/365096/680115/29470/308100/301120/50671/171402/681458/316124	Acsl3/Scp2/Acaca/Acat2l1/Hacd1/Mecr/Acat2/Acsbg2/Fasn/Elovl6/Scd3/Acsbg3
rno03050	Proteasome	41	-0.392177	-1.39769	0.041792	0.107373	0.0683561	4695	tags=56%, list=27%, signal=41%	85492/292766/29670/288455/29425/29669/117263/29671/29675/25581/365388/29666/29676/307821/83499/287984/29677/83806/311078/100360846/65138/81827/117262	Psmb7/Psmd8/Psma3/Pomp/Psmb5/Psma2/Psmc1/Psma4/Psmb2/Psmc2/Psmd13/Psmb6/Psmb3/Psmd7/Psmd4/Psmd2/Psmc3/Psmd1/Psmd14/Psmb6l1/Adrm1/Psmc5/Psmc4
rno00510	N-Glycan biosynthesis	53	-0.360373	-1.36176	0.0411465	0.106534	0.0678221	5280	tags=43%, list=30%, signal=30%	288525/499751/78947/192275/295051/245960/361174/81519/25197/315212/362031/293129/295319/367083/25478/303693/432392/296624/311847/313536/360475/94273/287983	Dhrsx/Man1b1/Mogs/Dad1/Alg5/Alg10/Alg11/Mgat1/St6gal1/Alg12/Alg14/Alg8/Man1a2/Alg9/Man2a1/Mgat5b/Fut8/Dolpp1/Dolk/B4galt2/Alg1/Mgat2/Alg3
rno04814	Motor proteins	176	-0.285506	-1.28849	0.0316241	0.0902775	0.0574726	2622	tags=28%, list=15%, signal=24%	171529/287876/171304/362044/294286/303242/309159/315740/25484/360849/501203/353302/25745/252893/685867/102551208/309523/29389/304447/29388/361308/24852/117253/117557/266714/252942/84393/117550/500450/79433/313170/81822/305012/24851/24837/192253/296369/290561/24582/29564/302964/296313/29557/29437/287408/81633/25365/691644/24583	Kif2c/Actg1/Kif11/Cenpe/Kifc1/Dnah2/Klc2/Kif23/Myo1e/Kif14/Myl12a/Kif15/Myh9/Dnah7/Myl6/Dynlt4/Kif20b/Tnni2/RGD1559821/Tnni1/Kif20a/Tpm4/Dnah11/Tpm3/Myo7a/Myh8/Kif4a/Kif5b/Tpm2/Myh10/Kif24/Actb/Kif26b/Tpm1/Tnnt2/Myo16/Tnnc2/Tnnc1/Myh11/Dync1i1/Bicdl2/Myl9/Myh7/Acta1/Myh1/Acta2/Actg2/Myh2/Myh3
rno03015	mRNA surveillance pathway	92	-0.313728	-1.28687	0.0218542	0.0664283	0.0422897	3942	tags=40%, list=23%, signal=31%	304277/313449/24668/305884/684558/299147/309338/295284/309179/24672/298648/368070/686295/305586/362178/298681/296219/366952/366790/311166/681012/100362453/308653/688288/690585/100360200/24420/307503/683927/298075/299256/298385/690303/317385/501526/296351/60660	Cpsf4/Upf3b/Ppp1ca/Acin1/Upf1/Ppp2r5e/Cstf2t/Rbm8a/Ppp2r5b/Ppp2ca/Tardbp/Pnn/Wdr82/Papolg/Cstf3/Ssu72/Nxt1/Cpsf1/Pym1/Clp1/Smg5/Ppp2cal1/Nxf2/Eif4a3/Alyref/Cpsf4l2/Gspt1/Etf1/Cstf2/Ncbp1/Cpsf2/Magoh/Magohb/Fus/Fusl1/Pabpc1l/Ppp2r2b
rno04022	cGMP-PKG signaling pathway	150	-0.288577	-1.27175	0.0176041	0.0570362	0.0363105	1744	tags=19%, list=10%, signal=18%	25176/29693/25031/25467/24185/29413/25262/29749/406169/84583/501099/24326/66012/24239/310616/171115/116601/54286/81638/288057/294961/497932/29715/296313/25202/29557/308899/497757/29747	Slc25a5/Atp2a2/Plcb4/Irs1/Akt1/Adra1d/Itpr1/Ppp3r2/Atf6b/Rgs2/Srf/Ednra/Gucy1a2/Cacna1c/Creb3l4/Pde5a/Atp2a1/Prkg1/Agtr1b/Mylk/Kcnmb2/Pik3r6/Slc8a1/Myl9/Gucy1b1/Myh7/Irag1/Gucy1a1/Kcnmb1
rno05410	Hypertrophic cardiomyopathy	92	-0.303088	-1.24322	0.0338654	0.0949555	0.0604507	2323	tags=35%, list=13%, signal=30%	25437/305941/140447/25717/24482/29693/315744/24852/25713/29161/117557/24598/116600/84015/316758/500450/24239/295929/81822/311061/116601/24851/24837/311144/290561/299940/114517/78975/29715/364786/29557/301518	Emd/Sgcg/Slc8a2/Tgfb3/Igf1/Atp2a2/Itga11/Tpm4/Itgb7/Cav3/Tpm3/Nos1/Cacnb2/Ttn/Lama1/Tpm2/Cacna1c/Mybpc3/Actb/Itgb6/Atp2a1/Tpm1/Tnnt2/Itga4/Tnnc1/Sntb1/Itga6/Prkaa2/Slc8a1/Itga8/Myh7/Prkag3
rno04820	Cytoskeleton in muscle cells	222	-0.265286	-1.21024	0.0365562	0.0992663	0.0631951	2375	tags=26%, list=14%, signal=23%	25650/362332/29132/25437/305941/25177/25745/499723/29389/300225/309374/29388/64353/25615/315744/24852/25713/117557/54133/299625/252942/84015/316758/689008/500450/79433/291605/100360457/116685/305679/295929/81822/311061/63839/24851/24837/290396/311144/310782/296369/291245/290561/24582/299940/114517/295426/296313/364786/445442/29557/29437/304816/287408/25365/114108/27064/691644/24583	Atp1b1/Flnc/Atp1a4/Emd/Sgcg/Fhl1/Myh9/Col24a1/Tnni2/Fmnl3/Ankrd2/Tnni1/Pdlim5/Sdc2/Itga11/Tpm4/Itgb7/Tpm3/Pdlim1/Lmnb2/Myh8/Ttn/Lama1/Fbn2/Tpm2/Myh10/Myot/Fmn2/Lmnb1/Vcl/Mybpc3/Actb/Itgb6/Fhl2/Tpm1/Tnnt2/Diaph3/Itga4/Mybphl/Tnnc2/Actn2/Tnnc1/Myh11/Sntb1/Itga6/Myoz2/Myl9/Itga8/Thbs1/Myh7/Acta1/Lmod1/Myh1/Actg2/Pdlim3/Ankrd1/Myh2/Myh3
rno03010	Ribosome	297	0.367161	1.24212	0.0395939	0.105397	0.067098	5229	tags=44%, list=30%, signal=31%	103693101/100360439/293846/289384/100360491/102548890/500123/120093247/683961/314556/498828/311120/367050/289401/108352861/100362298/100361180/314248/81764/81769/108351255/100360558/100360573/81770/100361060/100362640/291353/29304/100361715/291434/499133/691531/65139/100912032/83427/29287/688684/310653/29282/100909911/317646/94266/81763/29288/296596/28298/100365839/64298/100360843/81767/102555453…	Rps15al7/Rpl36l5/Rpl28l2/Rpl37l2/LOC100360491/LOC102548890/Rpl27al5/LOC120093247/Rps13l1/Rps18l3/Rpl10-ps14/Rpl15l2/Rpl35l2/Rpl31l9/Rps28-ps5/Rps18l5/LOC100361180/Rps17l1/Rpl10/Rpl36al1/Rpl35al8/Rps12l2/Rps12l1/Rpl37l1/Rpl36l3/Rps4x/Rps8l1/Rps6/Rps15al4/Rpl17/Rpl27al3/Rps28/Rps12/Rps27a/Rack1/Rps19/Rpl32l3/mrpl9/Rpl23/LOC100909911/Rpl13a/Rps27/Rpl5/Rps3a/Rpl7a/Rpl32/LOC100365839/Rpl31/Rps19l3/Rpl…
rno04151	PI3K-Akt signaling pathway	312	0.370697	1.25713	0.030426	0.0876058	0.0557717	2385	tags=21%, list=14%, signal=18%	24716/25610/59109/24336/24498/25155/310553/294797/24600/24596/117256/59325/310683/84423/305078/140942/29368/83785/365367/89805/80850/25054/170921/690987/25353/315981/140924/170583/309368/298518/78965/140635/29220/25724/64199/294515/296269/83571/314856/24499/314638/24827/25647/310132/25746/24628/315979/298947/311862/498982/29169/363265/25385/366508/25304/25730/305104/81008/25444/24514/116669/36257…	Ret/Csf3/Ntrk1/Epor/Il6/Syk/Tlr2/Il7r/Nos3/Ngfr/Ppp2r2c/Ereg/Itga10/Nrtn/Lamb3/Ddit4/Fgf17/Vegfa/Cd19/Angpt2/Gng2/Ntrk2/Itga2/Gys1/Spp1/Col6a4/Il2rg/Fgf23/Lama2/Csf3r/Csf1/Flt3/Thbs4/Itgb4/Gng11/Foxo3/Angpt4/Cdkn1b/Mdm2/Il6r/Creb3l3/Tgfa/Il7/Osmr/Il2rb/Pdgfb/Col6a6/Pik3cg/Lamc3/Myb/Vtn/Col4a3/Faslg/Pik3cd/Comp/Ntf4/Col9a1/Itga7/Fgf9/Jak2/Vwf/Artn/Tlr4/Pdgfra
rno05170	Human immunodeficiency virus 1 infection	192	0.390557	1.29583	0.0321577	0.0910226	0.0579469	2915	tags=22%, list=17%, signal=18%	414789/414791/24835/310553/60628/414819/414779/294228/25493/80850/309603/296078/315139/64625/681314/156767/29513/24812/366957/64199/24811/50664/498840/103691088/360323/25272/24747/25023/25679/25385/366508/24681/365527/29337/311658/29260/688319/24516/24223/317389/406194/25217	RT1-CE15/RT1-CE11/Tnf/Tlr2/Cxcr4/RT1-CE16/RT1-CE2/RT1-S3/Nfkbia/Gng2/RT1-CE1/Pak6/Tab1/Bid/Bax-ps2/Tnfrsf1b/Mapk13/Tap2/Rac2/Gng11/Tap1/Gnao1/Sting1/Elocl1/RT1-N2/Mapk10/RT1-M3-1/Prkcb/Itpr3/Faslg/Pik3cd/Prkcg/RT1-M6-2/Plcg2/Nfatc2/Tlr4/Rac3/Jun/B2m/Ccnb3/RT1-T18/Tapbp
rno05200	Pathways in cancer	484	0.380206	1.30437	0.00302139	0.0136371	0.00868166	2625	tags=21%, list=15%, signal=19%	24599/54702/24716/59109/81687/64546/24451/24336/24498/29147/24778/294797/60628/29527/81509/25245/308913/315294/305078/306722/24421/406162/25493/29368/83785/78971/84426/80850/24881/170921/83574/24208/81819/316526/140924/170583/64625/309368/29251/298518/140635/681314/171081/362896/366957/171333/64199/114103/300339/24314/83571/140584/314856/79225/29452/24499/297173/317673/170668/24827/25647/25746/24…	Nos2/Egln3/Ret/Ntrk1/Mmp9/Il12b/Hmox1/Epor/Il6/Jag2/Slc2a1/Il7r/Cxcr4/Ptgs2/Bdkrb1/Bdkrb2/Egln1/Wnt10b/Lamb3/Dapk1/Gsta1/Notch4/Nfkbia/Fgf17/Vegfa/Birc3/Wnt4/Gng2/Wnt1/Itga2/Rxrg/Ar/Pax8/Wnt6/Il2rg/Fgf23/Bid/Lama2/F2/Csf3r/Flt3/Bax-ps2/Csf2rb/Stat6/Rac2/Il12rb1/Gng11/Il5ra/Mmp1/Nqo1/Cdkn1b/Wnt11/Mdm2/Hes5/Epas1/Il6r/RSA-14-44/Bbc3/Rasgrp4/Tgfa/Il7/Il2rb/Pdgfb/Pim2/Elocl1/Lamc3/Gna13/Mapk10/Gstt2/…
rno05203	Viral carcinogenesis	186	0.395214	1.30823	0.0280374	0.0822061	0.0523342	2716	tags=19%, list=16%, signal=17%	24232/414789/414791/25155/298975/414819/414779/294228/25493/309603/25630/297453/114090/681314/679028/364073/83571/314856/100362738/297173/314638/360323/24747/687813/291157/366508/291152/25148/365527/29135/295277/84580/309452/24516/687001/117027	C3/RT1-CE15/RT1-CE11/Syk/Scin/RT1-CE16/RT1-CE2/RT1-S3/Nfkbia/RT1-CE1/Pkm/Hdac11/Egr2/Bax-ps2/Rbpj/Ddx3/Cdkn1b/Mdm2/Pkml1/RSA-14-44/Creb3l3/RT1-N2/RT1-M3-1/Traf1/Hist1h2bo/Pik3cd/Hist1h4m/Egr3/RT1-M6-2/Hpn/H4c14/Hdac5/Nfkb2/Jun/Hdac9/Ccr3
rno05202	Transcriptional misregulation in cancer	163	0.405032	1.33071	0.030303	0.0876058	0.0557717	4318	tags=34%, list=25%, signal=26%	171369/59109/81687/116630/304005/24498/25587/171045/24596/78971/304785/83574/58853/81819/25021/360635/140635/681314/106146145/83571/314856/24253/362176/362733/25746/29467/687813/25692/81679/114510/100362121/307403/311331/303828/103692131/24484/114851/192352/116663/170929/303836/24705/25112/60350/363447/24883/295052/117022/24790/25094/24842/60371/305152/100361558/117056/317376	Cd40/Ntrk1/Mmp9/Csf2/Nfkbiz/Il6/Id2/Mmp3/Ngfr/Birc3/Slc45a3/Rxrg/Nr4a3/Pax8/Itgam/Etv4/Flt3/Bax-ps2/Baiap3/Cdkn1b/Mdm2/Cebpb/Lmo2/Etv1/Il2rb/Ddit3/Traf1/Plat/Jup/Mllt3/Ddb2/Csf1r/Spint1/Etv5/Hoxa11/Igfbp3/Cdkn1a/Ss18l1/Dusp6/Bcl2a1/Bcl6/Rara/Gadd45a/Cd14/Tspan7/Wt1/Ccna1/Il1r2/Sp1/Mitf/Tp53/Birc2/Aff1/H3f3a/H3f3b/Tfe3
rno05161	Hepatitis B	144	0.412419	1.34354	0.0278075	0.0822061	0.0523342	4058	tags=32%, list=23%, signal=25%	81687/24835/24498/310553/364867/25493/315139/64625/116667/114090/681314/362896/29513/364073/314638/25272/25023/25385/363328/366508/25148/83615/24681/311658/100362121/24514/364594/29260/24516/25310/114851/288264/301059/313641/25631/363984/314322/246097/24918/64044/295052/361400/24777/170851/499801/24842	Mmp9/Tnf/Il6/Tlr2/Ticam2/Nfkbia/Tab1/Bid/Map3k1/Egr2/Bax-ps2/Stat6/Mapk13/Ddx3/Creb3l3/Mapk10/Prkcb/Faslg/Ticam1/Pik3cd/Egr3/Atp6ap1/Prkcg/Nfatc2/Ddb2/Jak2/Tlr3/Tlr4/Jun/Cyct/Cdkn1a/Ifnar1/Myd88/Hspg2/Smad3/Ikbke/Fos/Fas/Stat5a/Casp8/Ccna1/Nfatc3/Slc10a1/Map2k1/Ifih1/Tp53
rno05166	Human T-cell leukemia virus 1 infection	212	0.40627	1.35416	0.0129052	0.0441513	0.0281077	2182	tags=18%, list=13%, signal=16%	171369/414789/116630/309622/414791/24835/24498/24778/294273/309621/414819/414779/25445/294270/294228/25493/24230/309603/140924/116667/114090/681314/24981/309684/24330/100360982/500910/314638/25663/25746/313050/360323/25272/24747/29241/25464/366508/365527	Cd40/RT1-CE15/Csf2/RT1-Bb/RT1-CE11/Tnf/Il6/Slc2a1/RT1-DMb/RT1-Ba/RT1-CE16/RT1-CE2/Fosl1/RT1-Db1/RT1-S3/Nfkbia/Tspo/RT1-CE1/Il2rg/Map3k1/Egr2/Bax-ps2/RT1-Db2/Itgb2/Egr1/Relb/Tnfrsf13c/Creb3l3/Il1r1/Il2rb/Lck/RT1-N2/Mapk10/RT1-M3-1/Adcy8/Icam1/Pik3cd/RT1-M6-2
rno04922	Glucagon signaling pathway	94	0.432982	1.35466	0.0401786	0.105397	0.067098	1711	tags=19%, list=10%, signal=17%	64035/24778/83516/60416/24385/690987/25741/25630/59329/24642/24533/64562/24701/116719/100362738/25520/314638/29634	Pygl/Slc2a1/Ppargc1a/Pfkp/Gck/Gys1/Pfkl/Pkm/Sik1/Pgam1/Ldha/Prkab2/Pygm/Acacb/Pkml1/Prkag1/Creb3l3/Ldhc
rno04024	cAMP signaling pathway	190	0.414873	1.37545	0.0130868	0.0441513	0.0281077	2229	tags=21%, list=13%, signal=19%	353250/64354/25024/64680/24411/24408/24167/54305/25369/24925/24409/24316/25493/295378/85258/290646/83633/29716/366957/29290/59326/24603/297173/314638/25156/25653/360616/24214/25050/85257/114493/116700/25272/29241/361314/360718/366508/50592/140589/29639	Hcar2/Htr6/Gipr/Crhr2/Grin2c/Grin1/Adcyap1r1/Sstr2/Adora2a/Adrb1/Grin2a/Drd1/Nfkbia/Vav3/Cnga4/Pde4c/Gabbr2/Cacna1d/Rac2/Adora1/Rapgef3/Npr1/RSA-14-44/Creb3l3/Vav1/Tshb/Ppp1r1b/Atp1b2/Camk4/Cnga3/Cacna1f/Cga/Mapk10/Adcy8/Arap3/Popdc2/Pik3cd/Gria1/Gli1/Fxyd2
rno04724	Glutamatergic synapse	103	0.435367	1.37718	0.0351262	0.09696	0.0617268	2770	tags=26%, list=16%, signal=22%	24411/84012/25550/24408/24409/24414/29482/50599/80850/29716/116638/64199/691905/60590/691907/50664/29241/25023/25679/50592/24681/311341/252919/64532/24417/25398/24418	Grin2c/Slc1a6/Slc1a1/Grin1/Grin2a/Grm1/Slc1a2/Kcnj3/Gng2/Cacna1d/Slc17a7/Gng11/Pla2g4d/Grm8/Pla2g4f/Gnao1/Adcy8/Prkcb/Itpr3/Gria1/Prkcg/Pla2g4b/Slc38a3/Adcy5/Grm4/Cacna1a/Grm5
rno04020	Calcium signaling pathway	227	0.412182	1.38003	0.012966	0.0441513	0.0281077	2385	tags=23%, list=14%, signal=20%	24599/24716/59109/79247/64354/171358/24411/24408/24807/25369/29665/25041/308022/114862/60628/24600/81509/25245/24925/24409/24316/25645/29368/83785/24414/56827/25054/100911740/170583/29716/691807/114207/81677/257648/312981/89788/29412/24827/25050/24628/29316/114493/25007/29241/25023/25679/29717/24681/497197/29337/311658/25444/25267	Nos2/Ret/Ntrk1/Htr5b/Htr6/Camk1g/Grin2c/Grin1/Tacr1/Adora2a/P2rx7/P2rx6/Mcoln3/Cacna1h/Cxcr4/Nos3/Bdkrb1/Bdkrb2/Adrb1/Grin2a/Drd1/Adrb3/Fgf17/Vegfa/Grm1/Cacna1i/Ntrk2/Mrln/Fgf23/Cacna1d/C2h4orf3/Ryr1/Itpka/Cacna1b/Asph/Gna15/Adra1a/Tgfa/Camk4/Pdgfb/Adora2b/Cacna1f/Tacr2/Adcy8/Prkcb/Itpr3/Cacna1g/Prkcg/Plcz1/Plcg2/Nfatc2/Fgf9/Pdgfra
rno05235	PD-L1 expression and PD-1 checkpoint pathway in cancer	81	0.449939	1.38242	0.043379	0.110437	0.0703065	4257	tags=37%, list=25%, signal=28%	301348/299206/310553/364867/25493/25660/499342/29513/316241/81511/313050/363328/366508/60462/311658/116689/24514/29260/24516/309178/301626/301059/314322/116465/25300/361400/170851/360697/25738/311245	Zap70/Batf/Tlr2/Ticam2/Nfkbia/Cd28/Cd274/Mapk13/Nfkbie/Lat/Lck/Ticam1/Pik3cd/Batf3/Nfatc2/Ptpn6/Jak2/Tlr4/Jun/Batf2/Pdcd1/Myd88/Fos/Ifngr1/Cd247/Nfatc3/Map2k1/Ifngr2/Plcg1/Traf6
rno04726	Serotonergic synapse	92	0.448698	1.40022	0.0280584	0.0822061	0.0523342	3035	tags=33%, list=17%, signal=27%	79247/64354/29527/29713/50599/80850/25553/171522/29716/64199/257648/59326/691905/81639/116560/691907/24693/25290/50664/114493/25023/25679/24681/311341/64532/25398/25187/24303/24848/24922	Htr5b/Htr6/Ptgs2/Kcnj5/Kcnj3/Gng2/Slc6a4/Cyp2d4/Cacna1d/Gng11/Cacna1b/Rapgef3/Pla2g4d/Alox15/Kcnj9/Pla2g4f/Ptgs1/Alox5/Gnao1/Cacna1f/Prkcb/Itpr3/Prkcg/Pla2g4b/Adcy5/Cacna1a/Htr2c/Cyp2d3/Tph1/Gabrb3
rno04750	Inflammatory mediator regulation of TRP channels	90	0.449846	1.40445	0.0208017	0.064331	0.0409545	2777	tags=28%, list=16%, signal=23%	59109/24494/81509/25245/25466/29513/286920/66026/691905/691907/25663/29597/25272/29241/25023/25679/366508/24681/25364/29337/311341/171384/170538/64532/25187	Ntrk1/Il1b/Bdkrb1/Bdkrb2/Il1rap/Mapk13/Asic3/Trpv4/Pla2g4d/Pla2g4f/Il1r1/P2ry2/Mapk10/Adcy8/Prkcb/Itpr3/Pik3cd/Prkcg/Asic2/Plcg2/Pla2g4b/Trpm8/Prkcd/Adcy5/Htr2c
rno04926	Relaxin signaling pathway	120	0.440717	1.41198	0.0175242	0.0570362	0.0363105	2106	tags=18%, list=12%, signal=16%	24599/81687/171052/24600/25493/83785/80850/25616/679845/25387/29513/64199/300339/295144/89788/314638/50664/25272/114215/29241/363265/366508	Nos2/Mmp9/Mmp13/Nos3/Nfkbia/Vegfa/Gng2/Rln1/Shc4/Arrb1/Mapk13/Gng11/Mmp1/Rxfp1/Gna15/Creb3l3/Gnao1/Mapk10/Insl3/Adcy8/Col4a3/Pik3cd
rno04722	Neurotrophin signaling pathway	115	0.442599	1.41244	0.0218776	0.0664283	0.0422897	2611	tags=23%, list=15%, signal=20%	59109/362456/24596/25493/25054/116667/679845/681314/29513/294515/314870/297173/316241/25050/114203/58838/25272/25385/366508/81751/365057/25730/29337/170820/60450/170538/24516	Ntrk1/Arhgdib/Ngfr/Nfkbia/Ntrk2/Map3k1/Shc4/Bax-ps2/Mapk13/Foxo3/Irak3/RSA-14-44/Nfkbie/Camk4/Sh2b2/Sh2b3/Mapk10/Faslg/Pik3cd/Psen2/Map3k5/Ntf4/Plcg2/Prdm4/Matk/Prkcd/Jun
rno04380	Osteoclast differentiation	118	0.44524	1.42345	0.0169059	0.0559066	0.0355914	2611	tags=27%, list=15%, signal=23%	24494/24835/24493/25155/116591/498276/25732/25445/25493/289211/500904/315139/78965/29513/89829/100360982/25663/25050/25446/313050/114243/364018/25272/25528/25679/366508/683463/29337/311658/309452/307403/24516	Il1b/Tnf/Il1a/Syk/Fcgr2a/Fcgr2al1/Acp5/Fosl1/Nfkbia/Fcgr2b/Ncf4/Tab1/Csf1/Mapk13/Socs3/Relb/Il1r1/Camk4/Fosl2/Lck/Nox1/Ncf2/Mapk10/Sirpa/Itpr3/Pik3cd/Pirb/Plcg2/Nfatc2/Nfkb2/Csf1r/Jun
rno04014	Ras signaling pathway	212	0.428611	1.42863	0.00373029	0.0166122	0.0105757	2754	tags=25%, list=16%, signal=21%	59109/301348/29692/192213/24408/29354/24409/24596/29368/83785/89805/114513/80850/298581/25054/296078/170583/362799/78965/140635/679845/29387/288589/366957/64199/296269/691905/297173/691907/170668/24827/296211/24628/81511/85311/25272/116546/314596/25023/25385/366508/24681/29526/25730/29337/311341/25444/25267/688319/307403/114110/94268/66017	Ntrk1/Zap70/Pla2g2a/Rasgrf1/Grin1/Pla2g5/Grin2a/Ngfr/Fgf17/Vegfa/Angpt2/Rasgrf2/Gng2/Pla2g2e/Ntrk2/Pak6/Fgf23/Rapgef5/Csf1/Flt3/Shc4/Pla2g2c/Rasa4/Rac2/Gng11/Angpt4/Pla2g4d/RSA-14-44/Pla2g4f/Rasgrp4/Tgfa/Ralgapa2/Pdgfb/Lat/Pla1a/Mapk10/Ralb/Rasal3/Prkcb/Faslg/Pik3cd/Prkcg/Pla2g1b/Ntf4/Plcg2/Pla2g4b/Fgf9/Pdgfra/Rac3/Csf1r/Flt4/Efna1/Fgf20
rno04613	Neutrophil extracellular trap formation	130	0.443011	1.43004	0.0121849	0.0423932	0.0269884	3263	tags=30%, list=19%, signal=25%	24232/25155/310553/116591/498276/680322/316010/500904/25166/362119/25021/297453/29513/120097726/309684/366957/66021/684440/364018/689408/691992/25023/291157/366508/291152/24681/29337/116669/295277/84580/29260/687001/690158/690198/690230/65054/60586/83529/29302	C3/Syk/Tlr2/Fcgr2a/Fcgr2al1/H2ac12/Camp/Ncf4/Casp1/C5/Itgam/Hdac11/Mapk13/H2ac10/Itgb2/Rac2/Cybb/Tlr8/Ncf2/H2az2l2/Gp1ba/Prkcb/Hist1h2bo/Pik3cd/Hist1h4m/Prkcg/Plcg2/Vwf/H4c14/Hdac5/Tlr4/Hdac9/Fpr2/Fpr2l2/Fpr2l3/Aqp9/Clcn4/Vdac1/Itgb3
rno00564	Glycerophospholipid metabolism	97	0.456392	1.4338	0.0201016	0.0629084	0.0400489	3644	tags=32%, list=21%, signal=25%	29692/29354/687071/305166/287644/298581/29387/313997/691905/246115/691907/313977/85311/360843/83817/81925/114101/29526/362866/311341/29194/170919/286936/25062/367745/289439/362792/360426/140866/362261/362039	Pla2g2a/Pla2g5/Etnppl/Gpat3/Phospho1/Pla2g2e/Pla2g2c/Mboat2/Pla2g4d/Plpp2/Pla2g4f/Lpin1/Pla1a/Etnk2/Ache/Cds1/Cds2/Pla2g1b/Chpt1/Pla2g4b/Chka/Agpat4/Pcyt1b/Gpd2/Dgkk/Lpcat2b/Pld4/Pla2g6/Dgka/Lpin3/Pla2g12a
rno00330	Arginine and proline metabolism	47	0.507197	1.4396	0.0403917	0.105397	0.067098	1422	tags=21%, list=8%, signal=20%	24599/29593/308652/24600/114027/360526/64475/680409/302642/29221	Nos2/Ckmt1/Smox/Nos3/Dao/P4ha2/P4ha1/Prodh/Sat1/Arg1
rno04010	MAPK signaling pathway	278	0.427764	1.44111	0.000817738	0.00447745	0.00285044	2754	tags=25%, list=16%, signal=22%	24716/59109/24494/29477/24835/24493/192213/307950/114862/60587/24596/59325/84423/293847/116596/29368/83785/500690/89805/24472/56827/114513/25054/25466/315139/170583/116667/78965/140635/140729/25387/29716/29513/366957/257648/296269/100360982/691905/691907/170668/25663/24827/140725/24628/63995/171109/29467/114493/25272/25023/29717/25385/24681/365057/25730/311341/25444/362572/25267/309452/688319/307…	Ret/Ntrk1/Il1b/Mapt/Tnf/Il1a/Rasgrf1/Map3k21/Cacna1h/Dusp4/Ngfr/Ereg/Nrtn/Dusp9/Map3k8/Fgf17/Vegfa/Map3k9/Angpt2/Hspa1a/Cacna1i/Rasgrf2/Ntrk2/Il1rap/Tab1/Fgf23/Map3k1/Csf1/Flt3/Cacng8/Arrb1/Cacna1d/Mapk13/Rac2/Cacna1b/Angpt4/Relb/Pla2g4d/Pla2g4f/Rasgrp4/Il1r1/Tgfa/Cacng4/Pdgfb/Dusp10/Dusp5/Ddit3/Cacna1f/Mapk10/Prkcb/Cacna1g/Faslg/Prkcg/Map3k5/Ntf4/Pla2g4b/Fgf9/Artn/Pdgfra/Nfkb2/Rac3/Csf1r/Map4k1/…
rno00860	Porphyrin metabolism	35	0.54204	1.45668	0.0436457	0.110437	0.0703065	1951	tags=31%, list=11%, signal=28%	500946/24451/25319/100362384/29292/120102993/499244/501644/100359668/500804/24268	Hephl1/Hmox1/Fth1/LOC100362384/Ftl1/LOC120102993/Ftl1l7/Ftl1l1/Ftl1l2/Ftl1l5/Cp
rno04662	B cell receptor signaling pathway	71	0.485743	1.45961	0.0201533	0.0629084	0.0400489	2611	tags=31%, list=15%, signal=26%	25155/313498/25493/365367/295378/289211/293618/365948/362046/366957/289395/316241/25156/54259/25023/366508/683463/29337/311658/116689/688319/24516	Syk/Cd72/Nfkbia/Cd19/Vav3/Fcgr2b/Ifitm1/Bank1/Dapp1/Rac2/Cr2/Nfkbie/Vav1/Inpp5d/Prkcb/Pik3cd/Pirb/Plcg2/Nfatc2/Ptpn6/Rac3/Jun
rno00830	Retinol metabolism	42	0.525286	1.4611	0.0387985	0.104506	0.0665305	2188	tags=26%, list=13%, signal=23%	24172/310903/24296/171178/54349/312495/297805/316421/24300/114106/690953	Adh1c/Adh6/Cyp1a1/Adh7/Aox1/Cyp26b1/Sdr16c5/Aox2/Cyp2b1/Bco1/Rdh8
rno04931	Insulin resistance	101	0.463202	1.46222	0.0139227	0.0465018	0.0296041	2280	tags=24%, list=13%, signal=21%	24835/64035/192280/24498/24778/83516/24600/25493/309513/291582/690987/291567/64562/89829/295219/24701/116719/25520/314638/25139/25272/25023/366508/691447	Tnf/Pygl/Ppp1r3b/Il6/Slc2a1/Ppargc1a/Nos3/Nfkbia/Ppp1r3c/Slc27a6/Gys1/Ppargc1b/Prkab2/Socs3/Slc27a3/Pygm/Acacb/Prkag1/Creb3l3/Slc2a4/Mapk10/Prkcb/Pik3cd/Ppp1r3e
rno00620	Pyruvate metabolism	42	0.527244	1.46655	0.0362954	0.0992663	0.0631951	1711	tags=21%, list=10%, signal=19%	24172/310903/171178/25630/24533/116719/24651/100362738/29634	Adh1c/Adh6/Adh7/Pkm/Ldha/Acacb/Pklr/Pkml1/Ldhc
rno04382	Cornified envelope formation	138	0.457114	1.48222	0.00451252	0.0195738	0.0124611	3343	tags=36%, list=19%, signal=29%	65129/499174/306871/120100585/29520/29511/29301/102550416/117256/259235/305078/303687/291752/302934/294853/360625/287424/25724/295211/287700/304822/300250/120093743/683313/60335/299566/287702/680489/287098/363265/81679/83626/406227/366992/691932/155268/304125/407757/407759/102552651/102550699/366189/682033/83497/65030/366836/366991/301012/294027	Cldn1/Cers3/Dsp/Sprr2l1/Padi3/Padi2/Hal/Sprr2f/Ppp2r2c/Sdr9c7/Lamb3/Evpl/Dsg3/Ppl/Krt18/Krt12/Aloxe3/Itgb4/S100a5/Krt15/Pkp1/Krt1/Krt6a/Krt6c/Tgm1/Cyp4f39/Krt17/Cldn34e/Cldn6/Col4a3/Jup/Ugcg/Krt72/Krt90/Tgm5/Cldn16/Cldn17/Krt76/Krt83/Sprr2b/Sprr2d/Tgm3/Ppp2r3b/Ocln/Ephx2/Ephx3/Krt82/Col7a1/Col17a1
rno04713	Circadian entrainment	85	0.485767	1.50024	0.0106498	0.0378407	0.0240902	2150	tags=26%, list=12%, signal=23%	24411/24408/24167/114862/64455/24409/29713/56827/50599/80850/29716/114207/64199/116560/50664/29241/25023/25679/29717/50592/25523/24681	Grin2c/Grin1/Adcyap1r1/Cacna1h/Rasd1/Grin2a/Kcnj5/Cacna1i/Kcnj3/Gng2/Cacna1d/Ryr1/Gng11/Kcnj9/Gnao1/Adcy8/Prkcb/Itpr3/Cacna1g/Gria1/Prkg2/Prkcg
rno04660	T cell receptor signaling pathway	109	0.472538	1.50326	0.00534603	0.0223197	0.0142092	2999	tags=26%, list=17%, signal=21%	301348/116630/24835/25325/117256/116596/25493/25660/295378/296078/29513/297173/316241/25156/24930/81511/313050/25272/24699/366508/311658/116689/24516/24931/301626/100363332/363577/682033	Zap70/Csf2/Tnf/Il10/Ppp2r2c/Map3k8/Nfkbia/Cd28/Vav3/Pak6/Mapk13/RSA-14-44/Nfkbie/Vav1/Cd8a/Lat/Lck/Mapk10/Ptprc/Pik3cd/Nfatc2/Ptpn6/Jun/Cd8b/Pdcd1/Card11/Itk/Ppp2r3b
rno00590	Arachidonic acid metabolism	50	0.531145	1.5179	0.0101383	0.0368064	0.0234318	2338	tags=38%, list=13%, signal=33%	29692/361267/29527/29354/298581/192227/287424/29387/691905/81639/114097/367808/691907/24300/24693/25290/29526/311341/25527	Pla2g2a/Akr1c15/Ptgs2/Pla2g5/Pla2g2e/Ptgr1/Aloxe3/Pla2g2c/Pla2g4d/Alox15/Ltc4s/Ptges3l1/Pla2g4f/Cyp2b1/Ptgs1/Alox5/Pla2g1b/Pla2g4b/Ptgis
rno04623	Cytosolic DNA-sensing pathway	63	0.513382	1.51899	0.00781891	0.0296763	0.0188926	1679	tags=17%, list=10%, signal=16%	24494/81780/116637/24498/245920/25493/304987/25166/120103587/314336/498840	Il1b/Ccl5/Ccl4/Il6/Cxcl10/Nfkbia/Aim2/Casp1/Ddx41l1/Ddx41/Sting1
rno04622	RIG-I-like receptor signaling pathway	54	0.525312	1.52097	0.0073356	0.0284894	0.018137	1863	tags=20%, list=11%, signal=18%	64546/24835/245920/25493/287824/116667/29513/364073/498840/494338/25272	Il12b/Tnf/Cxcl10/Nfkbia/Trim80/Map3k1/Mapk13/Ddx3/Sting1/Trim25/Mapk10
rno04080	Neuroactive ligand-receptor interaction	254	0.454207	1.52535	0.000128794	0.000915257	0.000582672	3035	tags=36%, list=17%, signal=30%	24232/79247/64354/25026/25024/64680/24411/79557/300018/58812/24408/24167/25593/24807/54305/25369/29665/25041/60399/25590/81509/25245/24925/24409/24316/25645/282829/497196/25432/24414/117264/85268/24230/29446/25616/24241/362119/29191/29422/25635/29251/83633/171519/64568/25569/29636/24875/29290/295144/25516/25194/246075/29235/24536/29412/60590/29695/25653/292661/25321/29597/29316/24261/116700/31629…	C3/Htr5b/Htr6/Adm/Gipr/Crhr2/Grin2c/Chrna1/Lynx1/Apln/Grin1/Adcyap1r1/Hcrtr1/Tacr1/Sstr2/Adora2a/P2rx7/P2rx6/S1pr5/Chrna4/Bdkrb1/Bdkrb2/Adrb1/Grin2a/Drd1/Adrb3/Tac4/NMS/Drd4/Grm1/P2ry6/Hrh3/Tspo/Ghrh/Rln1/Calca/C5/Tac3/Chrne/Mc4r/F2/Gabbr2/Calcb/Galp/Trh/F2rl2/Vipr1/Adora1/Rxfp1/Pnoc/Gnrh1/Prlhr/Galr3/Lepr/Adra1a/Grm8/Gabrr2/Tshb/Ptgir/Ghrhr/P2ry2/Adora2b/Chrnb1/Cga/Ogfrl1/Tacr2/Insl3/Gria1/Calcr…
rno04081	Hormone signaling	168	0.464472	1.52693	0.00106863	0.00575684	0.00366493	3263	tags=33%, list=19%, signal=27%	25024/64680/500946/24336/25593/54305/24925/24316/25645/25432/25711/80850/29446/24241/56820/25635/171519/25569/64199/24875/59326/25516/89788/25194/246075/24536/29412/24603/297173/25653/25321/50664/303634/25656/116700/29241/366508/25523/81811/24514/259248/58965/64532/24695/24889/24952/25105/24657/171044/25570/25605/24174/29530/25329/29302	Gipr/Crhr2/Hephl1/Epor/Hcrtr1/Sstr2/Adrb1/Drd1/Adrb3/Drd4/Gucy2c/Gng2/Ghrh/Calca/Ramp3/Mc4r/Calcb/Trh/Gng11/Vipr1/Rapgef3/Pnoc/Gna15/Gnrh1/Prlhr/Lepr/Adra1a/Npr1/RSA-14-44/Tshb/Ghrhr/Gnao1/Gna13/Guca2a/Cga/Adcy8/Pik3cd/Prkg2/Thpol1/Jak2/Slc16a2/Ramp1/Adcy5/Pthlh/Cckar/Gcg/Nppb/Prl6a1/Sstr3/Trhr/Hcrtr2/Adra2b/Amhr2/Lhb/Itgb3
rno04664	Fc epsilon RI signaling pathway	58	0.526281	1.53691	0.00839538	0.0315062	0.0200576	2565	tags=29%, list=15%, signal=25%	116630/24835/25155/295378/29513/366957/691905/691907/25156/25290/81511/54259/25272/366508/29337/311341/688319	Csf2/Tnf/Syk/Vav3/Mapk13/Rac2/Pla2g4d/Pla2g4f/Vav1/Alox5/Lat/Inpp5d/Mapk10/Pik3cd/Plcg2/Pla2g4b/Rac3
rno01200	Carbon metabolism	108	0.485967	1.5411	0.00401757	0.0176562	0.0112403	1550	tags=21%, list=9%, signal=20%	24191/499525/25060/24644/24334/25059/60416/292804/24385/25741/25630/24849/498731/24642/24333/24189/24383/500959/298655/24651/100362738/314140/25058	Aldoc/Pgk1l1/Hk3/Pgk1/Eno2/Hk2/Pfkp/Gpi/Gck/Pfkl/Pkm/Tpi1/Tpi1l2/Pgam1/Eno1/Aldoa/Gapdh/Tpi1l1/H6pd/Pklr/Pkml1/Prps1l3/Hk1
rno05162	Measles	115	0.485588	1.54963	0.00257302	0.011936	0.00759869	3766	tags=32%, list=22%, signal=25%	24494/64546/24493/24498/310553/683206/25493/25660/24472/289211/304507/140924/64625/681314/83571/286918/246268/317673/25746/25272/25385/366508/29260/24516/25704/498286/84405/25310/288264/192281/301059/363984/314322/246097/24918/83427/64044	Il1b/Il12b/Il1a/Il6/Tlr2/Tnfaip3/Nfkbia/Cd28/Hspa1a/Fcgr2b/Oas1i/Il2rg/Bid/Bax-ps2/Cdkn1b/Mx2/Oas1b/Bbc3/Il2rb/Mapk10/Faslg/Pik3cd/Tlr4/Jun/Il2ra/Slamf1/Il12a/Cyct/Ifnar1/Oas1a/Myd88/Ikbke/Fos/Fas/Stat5a/Rack1/Casp8
rno04514	Cell adhesion molecules	137	0.47928	1.55144	0.00157687	0.00835993	0.00532211	3739	tags=46%, list=22%, signal=36%	171369/414789/309622/65129/414791/294273/309621/414819/414779/294270/294228/25660/690899/309603/116595/24771/315610/25021/499342/29583/24981/84008/60391/309684/305081/311426/303926/619374/25544/25752/24930/360323/680489/192183/24747/25464/24699/287098/25408/365527/641521/54266/308417/117258/24931/114588/155268/304125/29409/301626/406194/29259/360647/83497/24586/117096/24796/362800/499415/294269/2…	Cd40/RT1-CE15/RT1-Bb/Cldn1/RT1-CE11/RT1-DMb/RT1-Ba/RT1-CE16/RT1-CE2/RT1-Db1/RT1-S3/Cd28/Vsir/RT1-CE1/Nrxn2/Sdc4/Jaml/Itgam/Cd274/Pecam1/RT1-Db2/Cntnap1/Nrxn1/Itgb2/Cd34/Siglec1/Igsf11/Jam2/Sele/Cd6/Cd8a/RT1-N2/Cldn34e/Nectin1/RT1-M3-1/Icam1/Ptprc/Cldn6/Cd80/RT1-M6-2/Lrrc4/Madcam1/Nectin2/Cntn1/Cd8b/Cdh4/Cldn16/Cldn17/Mag/Pdcd1/RT1-T18/Sell/Icam2/Ocln/Ncam1/Nlgn2/Spn/Itgb8/Icoslg/RT1-Da/RT1-DMa/It…
rno04929	GnRH secretion	58	0.532458	1.55495	0.00668938	0.0262853	0.0167338	2150	tags=34%, list=12%, signal=30%	114862/54263/65206/29713/56827/50599/25353/83633/25387/29716/25194/116560/54261/114493/116700/25023/25679/29717/366508/24681	Cacna1h/Kcnn3/Kcnn4/Kcnj5/Cacna1i/Kcnj3/Spp1/Gabbr2/Arrb1/Cacna1d/Gnrh1/Kcnj9/Kcnn1/Cacna1f/Cga/Prkcb/Itpr3/Cacna1g/Pik3cd/Prkcg
rno04913	Ovarian steroidogenesis	44	0.555434	1.56069	0.00863495	0.0320452	0.0204007	2582	tags=36%, list=15%, signal=31%	24296/361267/25147/681337/29527/50559/503049/25426/691905/691907/25290/116700/29241/25644/311341/64532	Cyp1a1/Akr1c15/Cyp19a1/Acot4/Ptgs2/Acot1/Acot5/Cyp1b1/Pla2g4d/Pla2g4f/Alox5/Cga/Adcy8/Bmp6/Pla2g4b/Adcy5
rno04933	AGE-RAGE signaling pathway in diabetic complications	98	0.495902	1.56141	0.00201256	0.0100328	0.00638707	2611	tags=24%, list=15%, signal=21%	24770/24494/24835/24493/24498/24600/83785/681314/29513/24330/83571/66021/25544/114243/25272/25464/363265/25023/366508/24617/29337/24514/170538/24516	Ccl2/Il1b/Tnf/Il1a/Il6/Nos3/Vegfa/Bax-ps2/Mapk13/Egr1/Cdkn1b/Cybb/Sele/Nox1/Mapk10/Icam1/Col4a3/Prkcb/Pik3cd/Serpine1/Plcg2/Jak2/Prkcd/Jun
rno01230	Biosynthesis of amino acids	72	0.519965	1.56474	0.00521669	0.0220554	0.0140409	1422	tags=26%, list=8%, signal=24%	25698/24191/499525/24644/24334/60416/25741/25630/24849/498731/24642/24333/24189/24383/500959/24651/100362738/314140/29221	Ass1/Aldoc/Pgk1l1/Pgk1/Eno2/Pfkp/Pfkl/Pkm/Tpi1/Tpi1l2/Pgam1/Eno1/Aldoa/Gapdh/Tpi1l1/Pklr/Pkml1/Prps1l3/Arg1
rno00030	Pentose phosphate pathway	27	0.612921	1.56983	0.0104033	0.0373622	0.0237856	1419	tags=30%, list=8%, signal=27%	24191/60416/292804/25741/24189/298655/24645/314140	Aldoc/Pfkp/Gpi/Pfkl/Aldoa/H6pd/Pgm1/Prps1l3
rno00565	Ether lipid metabolism	45	0.557459	1.5706	0.0114439	0.0402344	0.0256141	4467	tags=49%, list=26%, signal=36%	29692/301265/29354/298581/84050/29387/293490/691905/246115/691907/29526/362866/311341/289439/50555/362792/360426/362039/114113/361527/24653/690610	Pla2g2a/Pla2g7/Pla2g5/Pla2g2e/Enpp2/Pla2g2c/Gdpd3/Pla2g4d/Plpp2/Pla2g4f/Pla2g1b/Chpt1/Pla2g4b/Lpcat2b/Ugt8/Pld4/Pla2g6/Pla2g12a/Pafah1b3/Pld3/Pla2g4a/Tmem86b
rno01250	Biosynthesis of nucleotide sugars	37	0.583045	1.58351	0.00745311	0.0286131	0.0182157	2297	tags=27%, list=13%, signal=23%	361245/25060/25059/292804/24385/252899/24645/25058/83472/289827	Cmah/Hk3/Hk2/Gpi/Gck/Miox/Pgm1/Hk1/Ugdh/Ugp2
rno05135	Yersinia infection	130	0.497885	1.60717	0.000786255	0.00437682	0.00278638	2721	tags=23%, list=16%, signal=20%	24770/24494/301348/24835/24498/25325/498276/499537/25493/295378/25166/315139/29513/366957/298784/297173/25156/24930/361882/81511/313050/117542/25272/363328/366508/311658/29260/688319/24516/24931	Ccl2/Il1b/Zap70/Tnf/Il6/Il10/Fcgr2al1/Fyb1/Nfkbia/Vav3/Casp1/Tab1/Mapk13/Rac2/Nlrc4/RSA-14-44/Vav1/Cd8a/Arhgef28/Lat/Lck/Baiap2/Mapk10/Ticam1/Pik3cd/Nfatc2/Tlr4/Rac3/Jun/Cd8b
rno04930	Type II diabetes mellitus	41	0.586278	1.61359	0.0056134	0.0228261	0.0145316	2615	tags=46%, list=15%, signal=39%	24835/25060/25059/24385/25630/29716/89829/257648/24651/100362738/25058/25139/25272/29717/366508/366949/84607/170538/25398	Tnf/Hk3/Hk2/Gck/Pkm/Cacna1d/Socs3/Cacna1b/Pklr/Pkml1/Hk1/Slc2a4/Mapk10/Cacna1g/Pik3cd/Mafa/Socs2/Prkcd/Cacna1a
rno00500	Starch and sucrose metabolism	26	0.635319	1.61423	0.00561505	0.0228261	0.0145316	1550	tags=38%, list=9%, signal=35%	64035/25060/288333/25059/292804/24385/690987/24701/24645/25058	Pygl/Hk3/Gbe1/Hk2/Gpi/Gck/Gys1/Pygm/Pgm1/Hk1
rno05206	MicroRNAs in cancer	218	0.483338	1.61521	2.97676e-05	0.000261641	0.000166567	2827	tags=29%, list=16%, signal=25%	81687/100314279/100314241/100314059/24451/100314010/29527/100314006/100314231/140942/100314053/406162/100314005/83785/100314292/100314002/100314228/304785/100314163/100314075/100314000/100314242/170913/24646/100314015/100314007/104797223/25279/679845/25426/83571/314856/100314290/100314213/100314019/297173/24628/100313993/100314012/100314277/100314236/100314020/100314159/100526572/100314121/25023/…	Mmp9/Mir101a/Mir146a/Mir222/Hmox1/Mir30d/Ptgs2/Mir27a/Mir30b/Ddit4/Mir210/Notch4/Mir27b/Vegfa/Mir181a2/Mir23b/Mir23a/Slc45a3/Mir221/Mir224/Mir21/Mir181c/Abcb1a/Abcb1b/Mir34a/Mir29b2/Mir193b/Cyp24a1/Shc4/Cyp1b1/Cdkn1b/Mdm2/Mir26a/Mirlet7a1/Mir99a/RSA-14-44/Pdgfb/Mirlet7i/Mir30c2/Mirlet7f-1os/Mir125a/Mir103a2/Mir181b2/Mir3556b/Mir146b/Prkcb/Mirlet7c2/Pik3cd/Prkcg/Mirlet7b/Plcg2/Ezr/Hdac5/Pdgfra/Bcl…
rno05169	Epstein-Barr virus infection	186	0.488823	1.6181	8.61846e-05	0.000639681	0.000407235	3691	tags=33%, list=21%, signal=27%	171369/414789/309622/414791/24835/24498/245920/25155/310553/683206/294273/309621/414819/414779/294270/294228/25493/365367/309603/304507/315139/64625/681314/24981/29513/679028/24812/24811/100360982/83571/314856/246268/289395/316241/680122/360323/25272/24747/25464/366508/365527/29337/100362121/309452/24516/64547/25406/24223/406194/25217/25310/114851/288264/192281/25112/301059/294269/363984/246097/2…	Cd40/RT1-CE15/RT1-Bb/RT1-CE11/Tnf/Il6/Cxcl10/Syk/Tlr2/Tnfaip3/RT1-DMb/RT1-Ba/RT1-CE16/RT1-CE2/RT1-Db1/RT1-S3/Nfkbia/Cd19/RT1-CE1/Oas1i/Tab1/Bid/Bax-ps2/RT1-Db2/Mapk13/Rbpj/Tap2/Tap1/Relb/Cdkn1b/Mdm2/Oas1b/Cr2/Nfkbie/Sap30/RT1-N2/Mapk10/RT1-M3-1/Icam1/Pik3cd/RT1-M6-2/Plcg2/Ddb2/Nfkb2/Jun/Bcl2l11/Cd44/B2m/RT1-T18/Tapbp/Cyct/Cdkn1a/Ifnar1/Oas1a/Gadd45a/Myd88/RT1-Da/Ikbke/Fas/RT1-DMa/Vim/Itgal
rno05230	Central carbon metabolism in cancer	65	0.548969	1.62819	0.00231197	0.0111913	0.0071246	1711	tags=26%, list=10%, signal=24%	24716/59109/80878/24778/25060/25059/60416/24385/25741/116551/25630/24642/140635/24533/100362738/25058/29634	Ret/Ntrk1/Slc16a3/Slc2a1/Hk3/Hk2/Pfkp/Gck/Pfkl/Pdk1/Pkm/Pgam1/Flt3/Ldha/Pkml1/Hk1/Ldhc
rno04082	Neuroactive ligand signaling	144	0.503033	1.63874	0.000161417	0.00107826	0.000686446	2150	tags=30%, list=12%, signal=26%	79247/64354/24411/84012/25550/24408/24807/25369/25041/25590/24925/24409/24316/282829/25432/24414/117264/29482/85268/80850/50676/25553/29191/25635/83633/116638/64199/29290/25516/29412/60590/29695/29597/50664/83511/29316/316290/25007/29241/25023/50592/83817/24681	Htr5b/Htr6/Grin2c/Slc1a6/Slc1a1/Grin1/Tacr1/Adora2a/P2rx6/Chrna4/Adrb1/Grin2a/Drd1/Tac4/Drd4/Grm1/P2ry6/Slc1a2/Hrh3/Gng2/Slc6a12/Slc6a4/Tac3/Mc4r/Gabbr2/Slc17a7/Gng11/Adora1/Pnoc/Adra1a/Grm8/Gabrr2/P2ry2/Gnao1/Slc6a2/Adora2b/Ogfrl1/Tacr2/Adcy8/Prkcb/Gria1/Ache/Prkcg
rno04610	Complement and coagulation cascades	62	0.55611	1.64166	0.00281984	0.0129017	0.00821351	2375	tags=40%, list=14%, signal=35%	24232/192262/60325/81509/25245/362119/25021/29251/312705/304929/29636/309684/406161/24153/289395/295703/287527/29169/29366/25692/24617/24236/116669/25268/60327	C3/C1s/Serpinb2/Bdkrb1/Bdkrb2/C5/Itgam/F2/C1r/F5/F2rl2/Itgb2/C4b/A2m/Cr2/Serping1/Serpinf2/Vtn/Serpine2/Plat/Serpine1/C4bpb/Vwf/Proc/F13a1
rno05167	Kaposi sarcoma-associated herpesvirus infection	175	0.5035	1.65884	4.40016e-05	0.000376835	0.000239901	2362	tags=22%, list=14%, signal=19%	24232/81503/114105/171551/414789/116630/414791/24498/25155/29527/414819/414779/294228/25493/83785/89805/80850/309603/25734/64625/681314/29513/64199/24628/360323/298947/25272/161452/24747/25464/25679/363328/366508/365527/29337/311658/24514/364594	C3/Cxcl1/Cxcl2/Cxcl3/RT1-CE15/Csf2/RT1-CE11/Il6/Syk/Ptgs2/RT1-CE16/RT1-CE2/RT1-S3/Nfkbia/Vegfa/Angpt2/Gng2/RT1-CE1/Hck/Bid/Bax-ps2/Mapk13/Gng11/Pdgfb/RT1-N2/Pik3cg/Mapk10/Lef1/RT1-M3-1/Icam1/Itpr3/Ticam1/Pik3cd/RT1-M6-2/Plcg2/Nfatc2/Jak2/Tlr3
rno05163	Human cytomegalovirus infection	208	0.499335	1.66667	9.10466e-06	8.94399e-05	5.69393e-05	2716	tags=24%, list=16%, signal=21%	24770/24494/81780/116637/414789/25542/414791/24835/24498/60628/29527/414819/414779/294228/25493/83785/89808/80850/309603/64625/681314/29513/24812/366957/64199/24811/314856/24499/297173/314638/25663/50664/498840/360323/303634/24747/29241/25023/25679/25385/366508/24681/365527/311658/25267/117539/688319/64532/24223/117027	Ccl2/Il1b/Ccl5/Ccl4/RT1-CE15/Ccl3/RT1-CE11/Tnf/Il6/Cxcr4/Ptgs2/RT1-CE16/RT1-CE2/RT1-S3/Nfkbia/Vegfa/Cx3cl1/Gng2/RT1-CE1/Bid/Bax-ps2/Mapk13/Tap2/Rac2/Gng11/Tap1/Mdm2/Il6r/RSA-14-44/Creb3l3/Il1r1/Gnao1/Sting1/RT1-N2/Gna13/RT1-M3-1/Adcy8/Prkcb/Itpr3/Faslg/Pik3cd/Prkcg/RT1-M6-2/Nfatc2/Pdgfra/Il10ra/Rac3/Adcy5/B2m/Ccr3
rno05416	Viral myocarditis	70	0.555182	1.66738	0.000688961	0.00390022	0.00248296	2182	tags=33%, list=13%, signal=29%	171369/414789/309622/414791/294273/309621/414819/414779/294270/294228/303468/25660/309603/64625/309368/24981/309684/366957/360323/24747/25464/25408/365527	Cd40/RT1-CE15/RT1-Bb/RT1-CE11/RT1-DMb/RT1-Ba/RT1-CE16/RT1-CE2/RT1-Db1/RT1-S3/Sgca/Cd28/RT1-CE1/Bid/Lama2/RT1-Db2/Itgb2/Rac2/RT1-N2/RT1-M3-1/Icam1/Cd80/RT1-M6-2
rno00982	Drug metabolism - cytochrome P450	43	0.601749	1.6841	0.00180585	0.00927931	0.00590741	3852	tags=53%, list=22%, signal=42%	24172/310903/25375/171178/24421/54349/25256/316421/246245/29487/501110/300850/498340/25260/24426/295037/688800/171341/246247/297029/316424/24423/24861	Adh1c/Adh6/Aldh3a1/Adh7/Gsta1/Aox1/Fmo1/Aox2/Fmo2/Gstt2/Gsta6/Gsta4/Mgst3l1/Gstt1/Gstp1/Mgst2/Aldh3b2/Mgst1/Fmo4/Gstk1/Aox4/Gstm1/Ugt1a1
rno05418	Fluid shear stress and atherosclerosis	131	0.524484	1.69426	6.01735e-05	0.000467967	0.000297918	2611	tags=29%, list=15%, signal=25%	25698/24770/24494/81687/24835/24493/24451/24600/24421/83785/24771/29583/29513/366957/24314/66026/297173/25544/25663/24628/114243/364018/25272/29487/501110/300850/498340/25464/25366/25692/306330/366508/25260/365057/24426/295037/688319/24516	Ass1/Ccl2/Il1b/Mmp9/Tnf/Il1a/Hmox1/Nos3/Gsta1/Vegfa/Sdc4/Pecam1/Mapk13/Rac2/Nqo1/Trpv4/RSA-14-44/Sele/Il1r1/Pdgfb/Nox1/Ncf2/Mapk10/Gstt2/Gsta6/Gsta4/Mgst3l1/Icam1/Acvr2b/Plat/Klf2/Pik3cd/Gstt1/Map3k5/Gstp1/Mgst2/Rac3/Jun
rno00052	Galactose metabolism	29	0.652679	1.69589	0.00163014	0.00850731	0.00541593	2297	tags=41%, list=13%, signal=36%	286921/25060/25059/60416/296972/24385/25741/116463/24645/25058/24528/289827	Akr1b8/Hk3/Hk2/Pfkp/Akr1b10/Gck/Pfkl/Akr1b7/Pgm1/Hk1/Lalba/Ugp2
rno05164	Influenza A	137	0.525077	1.69969	6.07782e-05	0.000467967	0.000297918	3832	tags=36%, list=22%, signal=28%	24770/24494/64546/81780/309622/24835/24493/65190/24498/245920/294273/309621/294270/25493/304507/287824/25166/85483/64625/681314/24981/89829/286918/246268/29268/494338/25464/25023/25385/363328/366508/24514/364594/29260/690504/367074/84405/25310/83529/288264/282817/192281/301059/294269/363984/246097/294274/64044/116465	Ccl2/Il1b/Il12b/Ccl5/RT1-Bb/Tnf/Il1a/Rsad2/Il6/Cxcl10/RT1-DMb/RT1-Ba/RT1-Db1/Nfkbia/Oas1i/Trim80/Casp1/Ciita/Bid/Bax-ps2/RT1-Db2/Socs3/Mx2/Oas1b/Tpsb2/Trim25/Icam1/Prkcb/Faslg/Ticam1/Pik3cd/Jak2/Tlr3/Tlr4/Kpna7/Tmprss4/Il12a/Cyct/Vdac1/Ifnar1/Pycard/Oas1a/Myd88/RT1-Da/Ikbke/Fas/RT1-DMa/Casp8/Ifngr1
rno04217	Necroptosis	129	0.527227	1.69992	6.16484e-05	0.000467967	0.000297918	2369	tags=26%, list=14%, signal=23%	24494/24835/24493/64035/683206/364867/680322/78971/25319/25166/64625/681314/362896/100362384/120097726/24701/29292/120102993/499244/501644/691905/100359668/81639/66021/691907/500804/25272/689408/25385/363328/311341/24514/364594/29260	Il1b/Tnf/Il1a/Pygl/Tnfaip3/Ticam2/H2ac12/Birc3/Fth1/Casp1/Bid/Bax-ps2/Stat6/LOC100362384/H2ac10/Pygm/Ftl1/LOC120102993/Ftl1l7/Ftl1l1/Pla2g4d/Ftl1l2/Alox15/Cybb/Pla2g4f/Ftl1l5/Mapk10/H2az2l2/Faslg/Ticam1/Pla2g4b/Jak2/Tlr3/Tlr4
rno04625	C-type lectin receptor signaling pathway	93	0.545957	1.7039	0.000151558	0.00103307	0.000657674	2714	tags=30%, list=16%, signal=26%	24494/64546/24835/680611/24498/25155/25325/29527/25493/25166/114090/29513/100360982/314856/450223/297173/24508/25272/25679/366508/25148/155140/29337/311658/170538/309452/24516/117551	Il1b/Il12b/Tnf/Bcl3/Il6/Syk/Il10/Ptgs2/Nfkbia/Casp1/Egr2/Mapk13/Relb/Mdm2/Clec4e/RSA-14-44/Irf1/Mapk10/Itpr3/Pik3cd/Egr3/Il23a/Plcg2/Nfatc2/Prkcd/Nfkb2/Jun/Ccl22
rno05322	Systemic lupus erythematosus	70	0.569291	1.70975	0.000353584	0.00214722	0.00136697	1236	tags=27%, list=7%, signal=25%	24232/171369/309622/24835/25325/192262/116591/498276/294273/309621/680322/24409/294270/25660/362119/312705/24981/120097726/406161	C3/Cd40/RT1-Bb/Tnf/Il10/C1s/Fcgr2a/Fcgr2al1/RT1-DMb/RT1-Ba/H2ac12/Grin2a/RT1-Db1/Cd28/C5/C1r/RT1-Db2/H2ac10/C4b
rno04216	Ferroptosis	45	0.607199	1.71074	0.00193663	0.0098005	0.00623921	2323	tags=36%, list=13%, signal=31%	24451/25319/100362384/170824/29292/120102993/499244/501644/100359668/81639/302642/66021/500804/306009/24268/25283	Hmox1/Fth1/LOC100362384/Steap3/Ftl1/LOC120102993/Ftl1l7/Ftl1l1/Ftl1l2/Alox15/Sat1/Cybb/Ftl1l5/Slc39a14/Cp/Gclc
rno04650	Natural killer cell mediated cytotoxicity	73	0.57132	1.72374	0.000222686	0.00143033	0.00091058	4252	tags=49%, list=25%, signal=37%	301348/116630/24835/25155/116591/295378/64625/679845/309684/366957/25156/81511/313050/25464/25023/25385/366508/24681/29337/311658/116689/688319/360647/305450/294251/288264/314612/114858/102556681/246097/308995/116465/25300/170851/360697/25738	Zap70/Csf2/Tnf/Syk/Fcgr2a/Vav3/Bid/Shc4/Itgb2/Rac2/Vav1/Lat/Lck/Icam1/Prkcb/Faslg/Pik3cd/Prkcg/Plcg2/Nfatc2/Ptpn6/Rac3/Icam2/Sh3bp2/Ncr3/Ifnar1/Shc2/Shc3/Sh2d1b2/Fas/Itgal/Ifngr1/Cd247/Map2k1/Ifngr2/Plcg1
rno00980	Metabolism of xenobiotics by cytochrome P450	46	0.612623	1.72697	0.000524145	0.00307131	0.00195526	2699	tags=37%, list=16%, signal=31%	24172/310903/25116/24296/25375/171178/24421/25426/29487/501110/300850/498340/26760/25260/24426/295037/688800	Adh1c/Adh6/Hsd11b1/Cyp1a1/Aldh3a1/Adh7/Gsta1/Cyp1b1/Gstt2/Gsta6/Gsta4/Mgst3l1/Akr7a3/Gstt1/Gstp1/Mgst2/Aldh3b2
rno04936	Alcoholic liver disease	122	0.541809	1.73664	4.79381e-05	0.000400283	0.000254829	2230	tags=24%, list=13%, signal=21%	24232/81503/24494/114105/24172/310903/64546/171551/24835/24498/83516/171178/25493/499358/362119/29469/315139/29513/64562/406161/294515/116719/25520/313977/25272/161452/25385/363328/365057	C3/Cxcl1/Il1b/Cxcl2/Adh1c/Adh6/Il12b/Cxcl3/Tnf/Il6/Ppargc1a/Adh7/Nfkbia/Scd4/C5/Lbp/Tab1/Mapk13/Prkab2/C4b/Foxo3/Acacb/Prkag1/Lpin1/Mapk10/Lef1/Faslg/Ticam1/Map3k5
rno05150	Staphylococcus aureus infection	53	0.608591	1.7546	0.000291338	0.00180198	0.00114718	1336	tags=38%, list=8%, signal=35%	24232/309622/25325/192262/116591/498276/294273/309621/294270/316010/289211/362119/294853/25021/360625/312705/24981/309684/406161/287700	C3/RT1-Bb/Il10/C1s/Fcgr2a/Fcgr2al1/RT1-DMb/RT1-Ba/RT1-Db1/Camp/Fcgr2b/C5/Krt18/Itgam/Krt12/C1r/RT1-Db2/Itgb2/C4b/Krt15
rno04672	Intestinal immune network for IgA production	34	0.656991	1.75566	0.000655708	0.00377597	0.00240386	3676	tags=62%, list=21%, signal=49%	171369/309622/24498/25325/294273/60628/309621/294270/25660/24981/114492/500910/25408/54266/282832/103693341/287034/499415/294269/24772/294274	Cd40/RT1-Bb/Il6/Il10/RT1-DMb/Cxcr4/RT1-Ba/RT1-Db1/Cd28/RT1-Db2/Ccl28/Tnfrsf13c/Cd80/Madcam1/Ccr9/Tnfrsf13b/Tnfrsf17/Icoslg/RT1-Da/Cxcl12/RT1-DMa
rno04658	Th1 and Th2 cell differentiation	72	0.585025	1.76053	0.000123027	0.000893285	0.000568684	3959	tags=49%, list=23%, signal=38%	301348/64546/309622/29147/294273/309621/294270/25493/140924/362896/24981/29513/679028/171333/316241/303496/25746/81511/313050/25272/84010/311658/24514/24516/25704/84405/294269/314322/25084/294274/24918/116465/25300/361400/310405	Zap70/Il12b/RT1-Bb/Jag2/RT1-DMb/RT1-Ba/RT1-Db1/Nfkbia/Il2rg/Stat6/RT1-Db2/Mapk13/Rbpj/Il12rb1/Nfkbie/Tbx21/Il2rb/Lat/Lck/Mapk10/Dll1/Nfatc2/Jak2/Jun/Il2ra/Il12a/RT1-Da/Fos/Il4r/RT1-DMa/Stat5a/Ifngr1/Cd247/Nfatc3/Maml3
rno00350	Tyrosine metabolism	32	0.667976	1.7659	0.000475032	0.00283323	0.00180369	3605	tags=53%, list=21%, signal=42%	24172/310903/25375/171178/54349/366675/81683/25085/316421/24661/287305/688800/290484/24267/29383/24311/316424	Adh1c/Adh6/Aldh3a1/Adh7/Aox1/Mifl3/Mif/Th/Aox2/Pnmt/4930438A08Rikl/Aldh3b2/Dct/Comt/Fah/Ddc/Aox4
rno05142	Chagas disease	93	0.568562	1.77445	2.40001e-05	0.00021665	0.000137924	499	tags=15%, list=3%, signal=15%	24599/24232/24770/24494/64546/81780/25542/24835/24498/310553/25325/25245/117256/25493	Nos2/C3/Ccl2/Il1b/Il12b/Ccl5/Ccl3/Tnf/Il6/Tlr2/Il10/Bdkrb2/Ppp2r2c/Nfkbia
rno05144	Malaria	44	0.633317	1.77954	0.000195699	0.00128163	0.000815916	2369	tags=39%, list=14%, signal=33%	25610/171369/24770/24494/24835/24498/310553/25325/29220/29583/309684/25544/690020/25632/25464/25304/29260	Csf3/Cd40/Ccl2/Il1b/Tnf/Il6/Tlr2/Il10/Thbs4/Pecam1/Itgb2/Sele/Klra4/Hba-a1/Icam1/Comp/Tlr4
rno05145	Toxoplasmosis	99	0.564247	1.78135	2.3728e-05	0.00021665	0.000137924	1863	tags=24%, list=11%, signal=22%	24599/171369/64546/309622/24835/310553/25325/294273/309621/294270/305078/25493/78971/24472/85483/315139/309368/24981/29513/25290/50664/298947/311862/25272	Nos2/Cd40/Il12b/RT1-Bb/Tnf/Tlr2/Il10/RT1-DMb/RT1-Ba/RT1-Db1/Lamb3/Nfkbia/Birc3/Hspa1a/Ciita/Tab1/Lama2/RT1-Db2/Mapk13/Alox5/Gnao1/Pik3cg/Lamc3/Mapk10
rno05143	African trypanosomiasis	30	0.691076	1.80659	0.000243378	0.00153374	0.000976412	2150	tags=40%, list=12%, signal=35%	24494/64546/24835/24498/25325/25544/25632/25464/681319/25023/25385/24681	Il1b/Il12b/Tnf/Il6/Il10/Sele/Hba-a1/Icam1/Ido2/Prkcb/Faslg/Prkcg
rno05168	Herpes simplex virus 1 infection	167	0.555749	1.82572	1.62378e-07	2.58259e-06	1.64413e-06	2362	tags=26%, list=14%, signal=23%	24232/24770/24494/366518/64546/81780/414789/309622/414791/24835/24498/25155/310553/294273/309621/414819/414779/294270/294228/25493/78971/309603/304507/25599/362119/315139/64625/681314/24981/24812/89829/24811/246268/363899/498840/360323/192183/24747/25385/363328/366508/365527/24514/364594	C3/Ccl2/Il1b/Tnfrsf14/Il12b/Ccl5/RT1-CE15/RT1-Bb/RT1-CE11/Tnf/Il6/Syk/Tlr2/RT1-DMb/RT1-Ba/RT1-CE16/RT1-CE2/RT1-Db1/RT1-S3/Nfkbia/Birc3/RT1-CE1/Oas1i/Cd74/C5/Tab1/Bid/Bax-ps2/RT1-Db2/Tap2/Socs3/Tap1/Oas1b/Pilrb2l5/Sting1/RT1-N2/Nectin1/RT1-M3-1/Faslg/Ticam1/Pik3cd/RT1-M6-2/Jak2/Tlr3
rno05340	Primary immunodeficiency	28	0.708585	1.83118	0.00014764	0.00102733	0.000654021	2008	tags=46%, list=12%, signal=41%	171369/301348/294797/365367/85483/140924/24812/24811/500910/294328/24930/313050/24699	Cd40/Zap70/Il7r/Cd19/Ciita/Il2rg/Tap2/Tap1/Tnfrsf13c/Aire/Cd8a/Lck/Ptprc
rno04145	Phagosome	137	0.569994	1.84508	7.29347e-07	8.40006e-06	5.34766e-06	2182	tags=28%, list=13%, signal=25%	24232/414789/309622/414791/500377/310553/116591/498276/294273/309621/414819/414779/294270/294228/289211/309603/155151/500904/170921/498638/140914/500319/500363/25021/312705/29220/24981/24812/309684/24811/66021/679312/312488/360323/364018/24747/25304/83615/365527	C3/RT1-CE15/RT1-Bb/RT1-CE11/Tuba8/Tlr2/Fcgr2a/Fcgr2al1/RT1-DMb/RT1-Ba/RT1-CE16/RT1-CE2/RT1-Db1/RT1-S3/Fcgr2b/RT1-CE1/Coro1a/Ncf4/Itga2/Msr1/Olr1/Tuba3a/Tuba3b/Itgam/C1r/Thbs4/RT1-Db2/Tap2/Itgb2/Tap1/Cybb/Tubb1/Atp6v1b1/RT1-N2/Ncf2/RT1-M3-1/Comp/Atp6ap1/RT1-M6-2
rno04630	JAK-STAT signaling pathway	125	0.576144	1.84998	5.03246e-07	6.22534e-06	3.96319e-06	3697	tags=42%, list=21%, signal=34%	25610/64546/116630/24336/24498/25325/294797/313173/54349/444986/24500/60584/288905/140924/298518/171081/362896/83681/89829/171333/114103/316421/24536/24499/681145/170819/25647/310132/25746/24628/362628/366508/155140/501043/252963/116689/81811/24514/84607/25267/117539/681112/25704/24657/171060/84405/114851/288264/289747/24335/25084/316424/24918	Csf3/Il12b/Csf2/Epor/Il6/Il10/Il7r/Cntfr/Aox1/Il22ra2/Il9r/Lif/Il27ra/Il2rg/Csf3r/Csf2rb/Stat6/Cish/Socs3/Il12rb1/Il5ra/Aox2/Lepr/Il6r/Il19/Il24/Il7/Osmr/Il2rb/Pdgfb/Ifnlr1/Pik3cd/Il23a/Il20rb/Il13ra1/Ptpn6/Thpol1/Jak2/Socs2/Pdgfra/Il10ra/Il20/Il2ra/Prl6a1/Il13ra2/Il12a/Cdkn1a/Ifnar1/Osm/Epo/Il4r/Aox4/Stat5a
rno04621	NOD-like receptor signaling pathway	150	0.567917	1.85591	1.55002e-07	2.58259e-06	1.64413e-06	2102	tags=25%, list=12%, signal=22%	24770/81503/24494/114105/171551/81780/24835/24498/683206/29665/291912/685067/25493/78971/316010/294329/304507/304987/25166/117514/297508/315139/310917/171164/500133/29513/294691/298784/66021/246268/297173/689161/498840/25272/191568/25679/363328	Ccl2/Cxcl1/Il1b/Cxcl2/Cxcl3/Ccl5/Tnf/Il6/Tnfaip3/P2rx7/Nod2/Gbp7/Nfkbia/Birc3/Camp/Trpm2/Oas1i/Aim2/Casp1/Txnip/Nampt/Tab1/Gbp4/Gbp2/Nod1/Mapk13/Naip5/Nlrc4/Cybb/Oas1b/RSA-14-44/Gabarapl1/Sting1/Mapk10/Naip6/Itpr3/Ticam1
rno05171	Coronavirus disease - COVID-19	272	0.552058	1.8599	1e-10	4.77143e-09	3.03759e-09	4773	tags=64%, list=28%, signal=47%	24232/25610/24770/24494/64546/116630/24835/24498/245920/25155/310553/192262/498276/171045/25493/103693101/304507/25166/362119/100360439/302668/293846/29251/312705/29513/300339/406161/66021/286918/246268/24499/289384/100360491/498840/684440/102548890/25272/500123/25023/366508/24681/120093247/29337/116669/364594/29260/60327/683961/24516/314556/498828/311120/367050/289401/84405/108352861/100362298/1…	C3/Csf3/Ccl2/Il1b/Il12b/Csf2/Tnf/Il6/Cxcl10/Syk/Tlr2/C1s/Fcgr2al1/Mmp3/Nfkbia/Rps15al7/Oas1i/Casp1/C5/Rpl36l5/Ace2/Rpl28l2/F2/C1r/Mapk13/Mmp1/C4b/Cybb/Mx2/Oas1b/Il6r/Rpl37l2/LOC100360491/Sting1/Tlr8/LOC102548890/Mapk10/Rpl27al5/Prkcb/Pik3cd/Prkcg/LOC120093247/Plcg2/Vwf/Tlr3/Tlr4/F13a1/Rps13l1/Jun/Rps18l3/Rpl10-ps14/Rpl15l2/Rpl35l2/Rpl31l9/Il12a/Rps28-ps5/Rps18l5/LOC100361180/Hbegf/Ifnar1/Rps17l1/…
rno04620	Toll-like receptor signaling pathway	87	0.602843	1.87596	8.07509e-06	8.17297e-05	5.20309e-05	2622	tags=32%, list=15%, signal=27%	171369/24494/64546/81780/116637/25542/24835/24498/245920/310553/364867/116596/25493/289337/25353/29469/315139/29513/305236/684440/25272/25408/363328/366508/364594/29260/24516/296953	Cd40/Il1b/Il12b/Ccl5/Ccl4/Ccl3/Tnf/Il6/Cxcl10/Tlr2/Ticam2/Map3k8/Nfkbia/Tlr5/Spp1/Lbp/Tab1/Mapk13/Cxcl11/Tlr8/Mapk10/Cd80/Ticam1/Pik3cd/Tlr3/Tlr4/Jun/Irf5
rno04978	Mineral absorption	57	0.644595	1.87932	1.19953e-05	0.00011447	7.28739e-05	1674	tags=35%, list=10%, signal=32%	689415/24567/500946/24451/304784/24218/84395/25552/25319/300051/100362384/29292/120102993/499244/501644/100359668/24784/25548/500804/24214	Mt2A/Mt1/Hephl1/Hmox1/Slc26a9/Atp7b/Slc34a2/Slc5a1/Fth1/Slc39a4/LOC100362384/Ftl1/LOC120102993/Ftl1l7/Ftl1l1/Ftl1l2/Slc9a3/Slc34a1/Ftl1l5/Atp1b2
rno00051	Fructose and mannose metabolism	37	0.699224	1.89905	4.98045e-05	0.000405724	0.000258293	1929	tags=43%, list=11%, signal=39%	25659/286921/24191/25060/25059/60416/296972/25741/116463/24849/498731/24189/500959/117276/25058/691018	Khk/Akr1b8/Aldoc/Hk3/Hk2/Pfkp/Akr1b10/Pfkl/Akr1b7/Tpi1/Tpi1l2/Aldoa/Tpi1l1/Pfkfb3/Hk1/Hsd17b14
rno04640	Hematopoietic cell lineage	71	0.63364	1.90403	4.47366e-06	4.82001e-05	3.06852e-05	3676	tags=66%, list=21%, signal=52%	25610/24494/116630/309622/24835/24493/24336/24498/294797/294273/309621/294270/502858/365367/81641/170921/24500/25021/298518/78965/140635/24981/305081/114103/24499/289395/24930/25663/25647/691992/81811/307403/25406/24931/294051/25704/29185/60427/29302/25145/24335/685269/294269/24936/25084/60350/294274	Csf3/Il1b/Csf2/RT1-Bb/Tnf/Il1a/Epor/Il6/Il7r/RT1-DMb/RT1-Ba/RT1-Db1/Gp9/Cd19/Anpep/Itga2/Il9r/Itgam/Csf3r/Csf1/Flt3/RT1-Db2/Cd34/Il5ra/Il6r/Cr2/Cd8a/Il1r1/Il7/Gp1ba/Thpol1/Csf1r/Cd44/Cd8b/Dntt/Il2ra/Cd37/Kitlg/Itgb3/Cd24/Epo/Itga2b/RT1-Da/Cd9/Il4r/Cd14/RT1-DMa
rno04612	Antigen processing and presentation	59	0.65135	1.90664	4.62153e-06	4.82372e-05	3.07088e-05	2915	tags=42%, list=17%, signal=35%	414789/309622/414791/24835/294273/309621/414819/414779/294270/294228/24472/309603/25599/85483/24981/24812/24811/24930/360323/24747/365527/24223/24931/406194/25217	RT1-CE15/RT1-Bb/RT1-CE11/Tnf/RT1-DMb/RT1-Ba/RT1-CE16/RT1-CE2/RT1-Db1/RT1-S3/Hspa1a/RT1-CE1/Cd74/Ciita/RT1-Db2/Tap2/Tap1/Cd8a/RT1-N2/RT1-M3-1/RT1-M6-2/B2m/Cd8b/RT1-T18/Tapbp
rno05417	Lipid and atherosclerosis	182	0.589655	1.94698	2.01031e-10	7.46048e-09	4.7495e-09	2369	tags=27%, list=14%, signal=24%	171369/24770/81503/24494/114105/81687/64546/171551/81780/171562/25542/24835/24296/24498/310553/171045/24600/364867/25493/295378/24472/500904/25166/85264/140914/83574/29469/315139/64625/681314/29513/300339/66021/297173/25156/25544/24787/29467/114243/364018/25272/25464/25385/363328/366508/365057/25696/311658/24514/29260	Cd40/Ccl2/Cxcl1/Il1b/Cxcl2/Mmp9/Il12b/Cxcl3/Ccl5/Ero1a/Ccl3/Tnf/Cyp1a1/Il6/Tlr2/Mmp3/Nos3/Ticam2/Nfkbia/Vav3/Hspa1a/Ncf4/Casp1/Abcg1/Olr1/Rxrg/Lbp/Tab1/Bid/Bax-ps2/Mapk13/Mmp1/Cybb/RSA-14-44/Vav1/Sele/Sod2/Ddit3/Nox1/Ncf2/Mapk10/Icam1/Faslg/Ticam1/Pik3cd/Map3k5/Vldlr/Nfatc2/Jak2/Tlr4
rno05152	Tuberculosis	144	0.606909	1.97713	1.09852e-09	3.33551e-08	2.12346e-08	1447	tags=22%, list=8%, signal=21%	24599/24232/24494/64546/309622/24835/24493/24498/25155/310553/25325/116591/498276/294273/291912/309621/294270/316010/289211/155151/25599/85483/29469/25021/64625/681314/24981/29513/309684/24253/450223/297173	Nos2/C3/Il1b/Il12b/RT1-Bb/Tnf/Il1a/Il6/Syk/Tlr2/Il10/Fcgr2a/Fcgr2al1/RT1-DMb/Nod2/RT1-Ba/RT1-Db1/Camp/Fcgr2b/Coro1a/Cd74/Ciita/Lbp/Itgam/Bid/Bax-ps2/RT1-Db2/Mapk13/Itgb2/Cebpb/Clec4e/RSA-14-44
rno05146	Amoebiasis	89	0.634741	1.97847	2.29534e-07	3.33323e-06	2.12201e-06	2369	tags=31%, list=14%, signal=27%	24599/81503/24494/114105/64546/171551/116630/24835/24498/310553/25325/498209/305078/266775/24572/25021/309368/309684/89788/29221/25663/311862/363265/25023/366508/24681/100363379/29260	Nos2/Cxcl1/Il1b/Cxcl2/Il12b/Cxcl3/Csf2/Tnf/Il6/Tlr2/Il10/Serpinb3a/Lamb3/Serpinb10/Muc2/Itgam/Lama2/Itgb2/Gna15/Arg1/Il1r1/Lamc3/Col4a3/Prkcb/Pik3cd/Prkcg/Prdx1l1/Tlr4
rno04659	Th17 cell differentiation	87	0.63839	1.98658	2.98794e-07	3.99188e-06	2.54132e-06	3940	tags=52%, list=23%, signal=40%	24494/301348/309622/301291/24498/294273/309621/294270/25493/83574/25466/288905/140924/362896/24981/300807/29513/171333/291100/24499/316241/25663/303496/25746/81511/313050/25272/317382/155140/311658/24514/680609/24516/25704/24705/25631/294269/314322/25084/301252/294274/24918/116465/25300/361400	Il1b/Zap70/RT1-Bb/Il17f/Il6/RT1-DMb/RT1-Ba/RT1-Db1/Nfkbia/Rxrg/Il1rap/Il27ra/Il2rg/Stat6/RT1-Db2/Rora/Mapk13/Il12rb1/Irf4/Il6r/Nfkbie/Il1r1/Tbx21/Il2rb/Lat/Lck/Mapk10/Foxp3/Il23a/Nfatc2/Jak2/Ebi3/Jun/Il2ra/Rara/Smad3/RT1-Da/Fos/Il4r/Hsp90ab1/RT1-DMa/Stat5a/Ifngr1/Cd247/Nfatc3
rno04064	NF-kappa B signaling pathway	96	0.637621	1.99789	1.5736e-08	3.28488e-07	2.09123e-07	2369	tags=35%, list=14%, signal=31%	171369/81503/24494/301348/114105/171551/116637/24835/25155/683206/29527/364867/25493/78971/315120/287824/29469/315139/361795/100360982/500910/25663/686781/81511/494338/313050/25464/25023/687813/365581/363328/362506/29337/29260	Cd40/Cxcl1/Il1b/Zap70/Cxcl2/Cxcl3/Ccl4/Tnf/Syk/Tnfaip3/Ptgs2/Ticam2/Nfkbia/Birc3/Card10/Trim80/Lbp/Tab1/Ltb/Relb/Tnfrsf13c/Il1r1/Ppp1r13l/Lat/Trim25/Lck/Icam1/Prkcb/Traf1/Edar/Ticam1/Ccl19/Plcg2/Tlr4
rno04062	Chemokine signaling pathway	156	0.613293	2.00682	1e-10	4.77143e-09	3.03759e-09	2717	tags=31%, list=16%, signal=27%	60665/24770/81503/287561/114105/171551/81780/81760/116637/25542/245920/79113/60628/306748/287673/25493/29538/89808/295378/497942/80850/25734/29363/360579/679845/25387/100124593/498335/366957/64199/294515/114492/297173/25156/305236/298947/29241/25023/362505/366508/362506/29337/24514/170538/688319/64532/117551/117027/282832	Cxcl6/Ccl2/Cxcl1/Ccl7/Cxcl2/Cxcl3/Ccl5/Grk1/Ccl4/Ccl3/Cxcl10/Fgr/Cxcr4/Cxcl14/Ccr7/Nfkbia/Ccl20/Cx3cl1/Vav3/Cxcl16/Gng2/Hck/Cxcr5/Ccl9/Shc4/Arrb1/Cxcr6/Cxcl13/Rac2/Gng11/Foxo3/Ccl28/RSA-14-44/Vav1/Cxcl11/Pik3cg/Adcy8/Prkcb/Ccl27/Pik3cd/Ccl19/Plcg2/Jak2/Prkcd/Rac3/Adcy5/Ccl22/Ccr3/Ccr9
rno04940	Type I diabetes mellitus	41	0.729215	2.00699	6.10319e-07	7.28023e-06	4.63475e-06	2182	tags=54%, list=13%, signal=47%	24494/64546/414789/309622/414791/24835/24493/294273/309621/414819/414779/294270/294228/25660/309603/29714/24981/360323/24747/25408/25385/365527	Il1b/Il12b/RT1-CE15/RT1-Bb/RT1-CE11/Tnf/Il1a/RT1-DMb/RT1-Ba/RT1-CE16/RT1-CE2/RT1-Db1/RT1-S3/Cd28/RT1-CE1/Ptprn2/RT1-Db2/RT1-N2/RT1-M3-1/Cd80/Faslg/RT1-M6-2
rno05133	Pertussis	70	0.668287	2.00707	1.1491e-07	2.02e-06	1.28598e-06	2369	tags=40%, list=14%, signal=35%	24599/24232/60665/24494/64546/24835/24493/24498/25325/192262/364867/292060/25166/362119/25021/312705/500133/29513/309684/406161/297173/295703/24508/25272/363328/155140/24236/29260	Nos2/C3/Cxcl6/Il1b/Il12b/Tnf/Il1a/Il6/Il10/C1s/Ticam2/Irf8/Casp1/C5/Itgam/C1r/Nod1/Mapk13/Itgb2/C4b/RSA-14-44/Serping1/Irf1/Mapk10/Ticam1/Il23a/C4bpb/Tlr4
rno05320	Autoimmune thyroid disease	35	0.752474	2.0222	8.15083e-07	9.07459e-06	5.77708e-06	2182	tags=60%, list=13%, signal=53%	171369/414789/309622/414791/25325/294273/309621/414819/414779/294270/294228/25660/309603/24981/25653/360323/116700/24747/25408/25385/365527	Cd40/RT1-CE15/RT1-Bb/RT1-CE11/Il10/RT1-DMb/RT1-Ba/RT1-CE16/RT1-CE2/RT1-Db1/RT1-S3/Cd28/RT1-CE1/RT1-Db2/Tshb/RT1-N2/Cga/RT1-M3-1/Cd80/Faslg/RT1-M6-2
rno04066	HIF-1 signaling pathway	104	0.64826	2.04834	2.44978e-09	6.29406e-08	4.00693e-08	2369	tags=38%, list=14%, signal=33%	24599/54702/24451/24498/24191/24778/499525/25060/24600/24644/308913/24334/25059/60416/83785/89805/25741/116551/24333/24189/24383/24533/117276/296269/83571/66021/29452/24499/25058/103691088/29634/25023/366508/24617/24681/29337/24874/24190/29260	Nos2/Egln3/Hmox1/Il6/Aldoc/Slc2a1/Pgk1l1/Hk3/Nos3/Pgk1/Egln1/Eno2/Hk2/Pfkp/Vegfa/Angpt2/Pfkl/Pdk1/Eno1/Aldoa/Gapdh/Ldha/Pfkfb3/Angpt4/Cdkn1b/Cybb/Epas1/Il6r/Hk1/Elocl1/Ldhc/Prkcb/Pik3cd/Serpine1/Prkcg/Plcg2/Vhl/Aldob/Tlr4
rno05321	Inflammatory bowel disease	48	0.72543	2.05647	7.41516e-08	1.37592e-06	8.75943e-07	1931	tags=48%, list=11%, signal=43%	24494/64546/309622/24835/24493/301291/24498/310553/25325/294273/291912/309621/294270/289337/140924/362896/24981/300807/171333/373540/303496/301365/317382	Il1b/Il12b/RT1-Bb/Tnf/Il1a/Il17f/Il6/Tlr2/Il10/RT1-DMb/Nod2/RT1-Ba/RT1-Db1/Tlr5/Il2rg/Stat6/RT1-Db2/Rora/Il12rb1/Il18rap/Tbx21/Il18r1/Foxp3
rno05134	Legionellosis	54	0.712946	2.06424	4.13659e-08	8.12718e-07	5.17394e-07	1344	tags=33%, list=8%, signal=31%	24232/81503/24494/114105/64546/171551/24835/24498/310553/84480/25493/24472/25166/289337/25021/309684/294691/298784	C3/Cxcl1/Il1b/Cxcl2/Il12b/Cxcl3/Tnf/Il6/Tlr2/Bnip3/Nfkbia/Hspa1a/Casp1/Tlr5/Itgam/Itgb2/Naip5/Nlrc4
rno05330	Allograft rejection	34	0.774081	2.06855	2.40616e-07	3.34858e-06	2.13178e-06	2182	tags=62%, list=13%, signal=54%	171369/64546/414789/309622/414791/24835/25325/294273/309621/414819/414779/294270/294228/25660/309603/24981/360323/24747/25408/25385/365527	Cd40/Il12b/RT1-CE15/RT1-Bb/RT1-CE11/Tnf/Il10/RT1-DMb/RT1-Ba/RT1-CE16/RT1-CE2/RT1-Db1/RT1-S3/Cd28/RT1-CE1/RT1-Db2/RT1-N2/RT1-M3-1/Cd80/Faslg/RT1-M6-2
rno05332	Graft-versus-host disease	33	0.784321	2.08664	1.97625e-07	3.0003e-06	1.91006e-06	2182	tags=64%, list=13%, signal=56%	24494/414789/309622/414791/24835/24493/24498/294273/309621/414819/414779/294270/294228/25660/309603/24981/360323/24747/25408/25385/365527	Il1b/RT1-CE15/RT1-Bb/RT1-CE11/Tnf/Il1a/Il6/RT1-DMb/RT1-Ba/RT1-CE16/RT1-CE2/RT1-Db1/RT1-S3/Cd28/RT1-CE1/RT1-Db2/RT1-N2/RT1-M3-1/Cd80/Faslg/RT1-M6-2
rno05140	Leishmaniasis	63	0.709099	2.09808	4.13152e-09	9.85662e-08	6.27494e-08	1362	tags=37%, list=8%, signal=34%	24599/24232/24494/64546/309622/24835/24493/310553/25325/116591/498276/294273/29527/309621/294270/25493/500904/25021/315139/24981/29513/309684/66021	Nos2/C3/Il1b/Il12b/RT1-Bb/Tnf/Il1a/Tlr2/Il10/Fcgr2a/Fcgr2al1/RT1-DMb/Ptgs2/RT1-Ba/RT1-Db1/Nfkbia/Ncf4/Itgam/Tab1/RT1-Db2/Mapk13/Itgb2/Cybb
rno00010	Glycolysis / Gluconeogenesis	63	0.71717	2.12196	1.5389e-09	4.28326e-08	2.72682e-08	1711	tags=44%, list=10%, signal=40%	24172/310903/24191/499525/25060/24644/24334/25375/25059/171178/60416/292804/24385/25741/25630/24849/498731/24642/24333/24189/24383/500959/24533/24651/100362738/24645/25058/29634	Adh1c/Adh6/Aldoc/Pgk1l1/Hk3/Pgk1/Eno2/Aldh3a1/Hk2/Adh7/Pfkp/Gpi/Gck/Pfkl/Pkm/Tpi1/Tpi1l2/Pgam1/Eno1/Aldoa/Gapdh/Tpi1l1/Ldha/Pklr/Pkml1/Pgm1/Hk1/Ldhc
rno04060	Cytokine-cytokine receptor interaction	210	0.642561	2.13974	1e-10	4.77143e-09	3.03759e-09	2781	tags=50%, list=16%, signal=43%	60665/25610/171369/24770/81503/24494/287561/114105/366518/64546/171551/81780/116637/116630/25542/60582/24835/24493/500590/301291/252835/24336/24498/245920/25325/294797/60628/306748/498951/24596/287673/313173/252878/29538/89808/294503/497942/29363/25466/24500/60584/360579/288905/140924/83711/298518/501996/78965/361795/171081/156767/679119/29455/500318/100124593/498335/171333/114103/114492/89814/37…	Cxcl6/Csf3/Cd40/Ccl2/Cxcl1/Il1b/Ccl7/Cxcl2/Tnfrsf14/Il12b/Cxcl3/Ccl5/Ccl4/Csf2/Ccl3/Il1rn/Tnf/Il1a/Tnfrsf9/Il17f/Gdf5/Epor/Il6/Cxcl10/Il10/Il7r/Cxcr4/Cxcl14/Il34/Ngfr/Ccr7/Cntfr/Tnfsf15/Ccl20/Cx3cl1/Nodal/Cxcl16/Cxcr5/Il1rap/Il9r/Lif/Ccl9/Il27ra/Il2rg/Inhbe/Csf3r/Il25/Csf1/Ltb/Csf2rb/Tnfrsf1b/Bmp8b/Gdf15/Cd27/Cxcr6/Cxcl13/Il12rb1/Il5ra/Ccl28/Tnfsf4/Il18rap/Lepr/Il6r/Il19/Inhbc/Tnfrsf13c/Acvr1b/Il…
rno04668	TNF signaling pathway	114	0.673797	2.15114	1e-10	4.77143e-09	3.03759e-09	2106	tags=34%, list=12%, signal=30%	60665/24770/81503/24494/114105/81687/171551/81780/116630/24835/680611/24498/245920/683206/171045/29527/303690/291912/116596/25493/29538/78971/89808/60584/315139/78965/156767/29513/89829/24253/314638/25544/301365/24508/25272/25464/687813/246208/366508	Cxcl6/Ccl2/Cxcl1/Il1b/Cxcl2/Mmp9/Cxcl3/Ccl5/Csf2/Tnf/Bcl3/Il6/Cxcl10/Tnfaip3/Mmp3/Ptgs2/Rhbdf2/Nod2/Map3k8/Nfkbia/Ccl20/Birc3/Cx3cl1/Lif/Tab1/Csf1/Tnfrsf1b/Mapk13/Socs3/Cebpb/Creb3l3/Sele/Il18r1/Irf1/Mapk10/Icam1/Traf1/Ifi47/Pik3cd
rno05323	Rheumatoid arthritis	71	0.725828	2.18104	1.617e-10	6.75096e-09	4.2978e-09	1224	tags=38%, list=7%, signal=35%	60665/24770/81503/24494/114105/171551/81780/116630/25542/309622/24835/24493/24498/310553/171045/294273/25732/309621/294270/83785/29538/25660/78965/361795/24981/309684/300339	Cxcl6/Ccl2/Cxcl1/Il1b/Cxcl2/Cxcl3/Ccl5/Csf2/Ccl3/RT1-Bb/Tnf/Il1a/Il6/Tlr2/Mmp3/RT1-DMb/Acp5/RT1-Ba/RT1-Db1/Vegfa/Ccl20/Cd28/Csf1/Ltb/RT1-Db2/Itgb2/Mmp1
rno04061	Viral protein interaction with cytokine and cytokine receptor	61	0.782575	2.3074	1e-10	4.77143e-09	3.03759e-09	2780	tags=74%, list=16%, signal=62%	60665/24770/81503/287561/114105/366518/171551/81780/116637/25542/24835/24498/245920/25325/60628/306748/498951/287673/29538/89808/29363/360579/140924/78965/156767/498335/114492/373540/24499/681145/305236/170819/25746/301365/362505/362506/501043/84348/117539/307403/117551/117027/282832/681112/25704	Cxcl6/Ccl2/Cxcl1/Ccl7/Cxcl2/Tnfrsf14/Cxcl3/Ccl5/Ccl4/Ccl3/Tnf/Il6/Cxcl10/Il10/Cxcr4/Cxcl14/Il34/Ccr7/Ccl20/Cx3cl1/Cxcr5/Ccl9/Il2rg/Csf1/Tnfrsf1b/Cxcl13/Ccl28/Il18rap/Il6r/Il19/Cxcl11/Il24/Il2rb/Il18r1/Ccl27/Ccl19/Il20rb/Ackr3/Il10ra/Csf1r/Ccl22/Ccr3/Ccr9/Il20/Il2ra
rno04657	IL-17 signaling pathway	78	0.76824	2.3473	1e-10	4.77143e-09	3.03759e-09	1291	tags=35%, list=7%, signal=32%	170496/60665/25610/24770/81503/24494/287561/114105/81687/171551/171052/116630/24835/301291/24498/245920/683206/171045/29527/25445/309114/25493/29538/501996/29513/300339/24253	Lcn2/Cxcl6/Csf3/Ccl2/Cxcl1/Il1b/Ccl7/Cxcl2/Mmp9/Cxcl3/Mmp13/Csf2/Tnf/Il17f/Il6/Cxcl10/Tnfaip3/Mmp3/Ptgs2/Fosl1/Muc5b/Nfkbia/Ccl20/Il25/Mapk13/Mmp1/Cebpb
rno04971	Gastric acid secretion	66	-0.329178	-1.27544	0.0516741	0.128787	0.0819888	3050	tags=27%, list=18%, signal=23%	84020/24217/24785/29718/287876/25650/29132/54231/170899/25031/25262/171138/81822/288057/170847/29712/297910/29719	Kcnq1/Atp4b/Slc9a4/Kcnj10/Actg1/Atp1b1/Atp1a4/Car2/Kcnk2/Plcb4/Itpr1/Kcne2/Actb/Mylk/Kcnj15/Kcnj2/Slc26a7/Kcnj16
rno00592	alpha-Linolenic acid metabolism	22	0.614491	1.50733	0.0517711	0.128787	0.0819888	3776	tags=50%, list=22%, signal=39%	29692/29354/298581/29387/691905/691907/29526/311341/360426/362039/501072	Pla2g2a/Pla2g5/Pla2g2e/Pla2g2c/Pla2g4d/Pla2g4f/Pla2g1b/Pla2g4b/Pla2g6/Pla2g12a/Acaa1b
rno04744	Phototransduction	21	0.615161	1.5018	0.0520548	0.128787	0.0819888	3125	tags=38%, list=18%, signal=31%	29481/81760/56814/140936/113911/301233/365901/24717	Rgs9/Grk1/Slc24a1/Rcvrn/Gucy2e/Guca1a/Gnat2/Rho
rno04973	Carbohydrate digestion and absorption	38	0.523821	1.42699	0.0524968	0.128926	0.082077	3324	tags=37%, list=19%, signal=30%	25060/65197/25059/25552/29716/25058/24214/170634/25023/366508/29639/84396/24203/29573	Hk3/Slc2a5/Hk2/Slc5a1/Cacna1d/Hk1/Atp1b2/Tas1r3/Prkcb/Pik3cd/Fxyd2/Atp1b4/Amy1/Slc37a4
rno04390	Hippo signaling pathway	149	-0.269506	-1.18962	0.0542533	0.132267	0.0842041	1219	tags=15%, list=7%, signal=14%	361630/85265/64032/25554/361839/81822/252834/305251/315824/300289/500047/114487/362675/282581/364754/293990/297357/683522/25378/366031/303039/60660/252833	Tead1/Ajuba/Ccn2/Snai2/Ctnna3/Actb/Gdf6/Rassf6/Bmp5/Amot/Wnt16/Wnt2/Tp73/Fzd6/Fzd8/Wnt8b/Ctnna2/Tead4/Amh/Crb2/Wwc1/Ppp2r2b/Gdf7
rno05034	Alcoholism	126	0.403865	1.29632	0.0552546	0.133203	0.0847999	2659	tags=21%, list=15%, signal=18%	24411/24408/25369/680322/24409/24316/80850/25054/297453/679845/120097726/64199/25085/314638/360616/50664/25050/29316/689408/291157/291152/295277/84580/64532/83506/687001	Grin2c/Grin1/Adora2a/H2ac12/Grin2a/Drd1/Gng2/Ntrk2/Hdac11/Shc4/H2ac10/Gng11/Th/Creb3l3/Ppp1r1b/Gnao1/Camk4/Adora2b/H2az2l2/Hist1h2bo/Hist1h4m/H4c14/Hdac5/Adcy5/Camkk2/Hdac9
rno04071	Sphingolipid signaling pathway	119	0.408456	1.30773	0.0554348	0.133203	0.0847999	2230	tags=18%, list=13%, signal=15%	24835/499174/60399/24600/25245/313339/117256/314438/64625/681314/29513/366957/29290/297173/303634/25272/25023/366508/24681/290658/365057	Tnf/Cers3/S1pr5/Nos3/Bdkrb2/Acer2/Ppp2r2c/Degs2/Bid/Bax-ps2/Mapk13/Rac2/Adora1/RSA-14-44/Gna13/Mapk10/Prkcb/Pik3cd/Prkcg/Cers1/Map3k5
rno05224	Breast cancer	135	-0.265972	-1.17005	0.0563444	0.134422	0.0855758	1655	tags=18%, list=10%, signal=16%	25154/56718/367858/64512/24329/24185/497672/117516/308692/29349/500047/114487/282581/364754/293990/311332/29369/29146/60664/64030/155430/60464/155437/313575	Pgr/Mtor/Hrasl1/Fzd2/Egfr/Akt1/Brca1/Tnfsf11/Peg12/Fgf8/Wnt16/Wnt2/Fzd6/Fzd8/Wnt8b/Dll4/Fgf18/Jag1/Pik3r3/Kit/Hey2/Fgf16/Hey1/Heyl
rno04910	Insulin signaling pathway	125	0.404791	1.29977	0.0574215	0.13602	0.086593	2366	tags=20%, list=14%, signal=17%	64035/192280/25060/83516/25059/309513/24385/690987/679845/116717/64562/89829/24701/116719/24651/24679/25520/25058/114203/25139/25521/25272/366508/691447/84607	Pygl/Ppp1r3b/Hk3/Ppargc1a/Hk2/Ppp1r3c/Gck/Gys1/Shc4/Trip10/Prkab2/Socs3/Pygm/Acacb/Pklr/Prkar2b/Prkag1/Hk1/Sh2b2/Slc2a4/Prkar1b/Mapk10/Pik3cd/Ppp1r3e/Socs2
rno04666	Fc gamma R-mediated phagocytosis	92	0.425855	1.32894	0.0594837	0.139912	0.0890713	2623	tags=24%, list=15%, signal=20%	25155/116591/498276/298975/295378/289211/25734/366957/691905/246115/691907/25156/81511/54259/24699/25023/366508/24681/29337/311341/170538/362719	Syk/Fcgr2a/Fcgr2al1/Scin/Vav3/Fcgr2b/Hck/Rac2/Pla2g4d/Plpp2/Pla2g4f/Vav1/Lat/Inpp5d/Ptprc/Prkcb/Pik3cd/Prkcg/Plcg2/Pla2g4b/Prkcd/Asap2
rno00220	Arginine biosynthesis	20	0.612995	1.48872	0.0599455	0.140013	0.089135	311	tags=15%, list=2%, signal=15%	24599/25698/24600	Nos2/Ass1/Nos3
rno05216	Thyroid cancer	37	0.519491	1.4109	0.0612245	0.14146	0.0900568	1056	tags=14%, list=6%, signal=13%	24716/59109/83574/81819/681314	Ret/Ntrk1/Rxrg/Pax8/Bax-ps2
rno04144	Endocytosis	245	0.37196	1.24858	0.0614125	0.14146	0.0900568	2196	tags=13%, list=13%, signal=12%	81760/414789/287443/414791/60628/414819/414779/311785/360605/294228/24472/309603/500906/498650/687758/140924/25387/314856/293154/297173/362279/171049/25746/360323/307500/24747/361314/81921/303337/313409/365527/140694	Grk1/RT1-CE15/Acap1/RT1-CE11/Cxcr4/RT1-CE16/RT1-CE2/Psd4/Epn3/RT1-S3/Hspa1a/RT1-CE1/Cyth4/Rab11fip1/Pip5kl1/Il2rg/Arrb1/Mdm2/Folr2/RSA-14-44/Pard6b/Folr1/Il2rb/RT1-N2/Psd2/RT1-M3-1/Arap3/Sh3gl3/Rab11fip4/Dnajc6/RT1-M6-2/Dnm1
rno04975	Fat digestion and absorption	35	0.515888	1.3864	0.071887	0.164454	0.104695	2864	tags=29%, list=17%, signal=24%	29692/29354/432367/298581/29387/246115/681211/29526/24360/117554	Pla2g2a/Pla2g5/Npc1l1/Pla2g2e/Pla2g2c/Plpp2/Mogat2/Pla2g1b/Fabp1/Pnliprp2
rno05022	Pathways of neurodegeneration - multiple diseases	442	0.340599	1.16882	0.0821643	0.186686	0.118849	2150	tags=14%, list=12%, signal=12%	24599/24494/100362331/29477/24835/24493/24587/500377/24411/84683/24498/500442/24408/29527/315294/24409/29430/24414/29211/84426/24881/500319/500363/316526/64625/24688/78965/681314/360654/156767/29716/29513/114207/257648/140584/117250/66021/679312/246294/295704/116671/29326/29467/114493/114243/24248/60395/25272/360827/316226/293649/25023/25679/25385/282582/207117/29219/81751/50592/24681	Nos2/Il1b/Ndufa4l2/Mapt/Tnf/Il1a/Nefh/Tuba8/Grin2c/Cox4i2/Il6/Dnai1/Grin1/Ptgs2/Wnt10b/Grin2a/Hap1/Grm1/Sptbn2/Wnt4/Wnt1/Tuba3a/Tuba3b/Wnt6/Bid/Prph/Csf1/Bax-ps2/Dnai2/Tnfrsf1b/Cacna1d/Mapk13/Ryr1/Cacna1b/Wnt11/Dnah6/Cybb/Tubb1/Optn/Ube2l6/Cdk5r1/Gpx2/Ddit3/Cacna1f/Nox1/Cat/Trpc3/Mapk10/Ulk1/Klc4/Lrp5/Prkcb/Itpr3/Faslg/Wnt5b/Dnah8/Snca/Psen2/Gria1/Prkcg
rno01523	Antifolate resistance	28	0.536761	1.38714	0.0840999	0.189395	0.120573	1545	tags=21%, list=9%, signal=20%	24494/24835/24498/25303/293154/171049	Il1b/Tnf/Il6/Abcc2/Folr2/Folr1
rno04911	Insulin secretion	76	0.433164	1.31827	0.0844907	0.189395	0.120573	3021	tags=30%, list=17%, signal=25%	24778/24167/54263/65206/83731/24385/29716/54261/314638/24214/114493/29241/25023/25679/24681/29639/25012/64532/24889/24952/302813/24166/84396	Slc2a1/Adcyap1r1/Kcnn3/Kcnn4/Kcnma1/Gck/Cacna1d/Kcnn1/Creb3l3/Atp1b2/Cacna1f/Adcy8/Prkcb/Itpr3/Prkcg/Fxyd2/Snap25/Adcy5/Cckar/Gcg/Gpr119/Adcyap1/Atp1b4
rno05020	Prion disease	249	0.359289	1.20573	0.0881148	0.196202	0.124907	2106	tags=13%, list=12%, signal=12%	24494/100362331/81780/24835/24493/500377/24411/84683/24498/24408/24409/24472/500904/500319/500363/362119/681314/29716/29513/24330/366957/114207/257648/66021/314638/679312/29467/114493/364018/25272/316226/25679/366508	Il1b/Ndufa4l2/Ccl5/Tnf/Il1a/Tuba8/Grin2c/Cox4i2/Il6/Grin1/Grin2a/Hspa1a/Ncf4/Tuba3a/Tuba3b/C5/Bax-ps2/Cacna1d/Mapk13/Egr1/Rac2/Ryr1/Cacna1b/Cybb/Creb3l3/Tubb1/Ddit3/Cacna1f/Ncf2/Mapk10/Klc4/Itpr3/Pik3cd
rno05030	Cocaine addiction	45	0.473618	1.33438	0.0932836	0.206336	0.131358	1762	tags=20%, list=10%, signal=18%	29481/24411/24408/24409/24316/25085/314638/360616/116671	Rgs9/Grin2c/Grin1/Grin2a/Drd1/Th/Creb3l3/Ppp1r1b/Cdk5r1
rno04972	Pancreatic secretion	85	0.415601	1.28354	0.0979499	0.213964	0.136214	3052	tags=25%, list=18%, signal=20%	29692/308016/29354/83731/298581/29387/24269/297173/24214/29241/25023/25679/24681/29639/29526/64532/24291/24889/117554/84396/24203	Pla2g2a/Clca2/Pla2g5/Kcnma1/Pla2g2e/Pla2g2c/Cpa1/RSA-14-44/Atp1b2/Adcy8/Prkcb/Itpr3/Prkcg/Fxyd2/Pla2g1b/Adcy5/Ctrb1/Cckar/Pnliprp2/Atp1b4/Amy1
rno00790	Folate biosynthesis	27	0.53531	1.37105	0.0980132	0.213964	0.136214	1257	tags=26%, list=7%, signal=24%	361267/29244/286921/296972/361300/116463/25085	Akr1c15/Gch1/Akr1b8/Akr1b10/Mocos/Akr1b7/Th
rno04725	Cholinergic synapse	96	0.402349	1.2607	0.1	0.216883	0.138072	2615	tags=24%, list=15%, signal=20%	116649/29682/25590/50599/80850/29716/64199/257648/314638/259273/50664/25050/298947/114493/29241/25023/25679/366508/83817/24681/24514/64532/25398	Kcnj4/Kcnq3/Chrna4/Kcnj3/Gng2/Cacna1d/Gng11/Cacna1b/Creb3l3/Kcnq5/Gnao1/Camk4/Pik3cg/Cacna1f/Adcy8/Prkcb/Itpr3/Pik3cd/Ache/Prkcg/Jak2/Adcy5/Cacna1a
rno05132	Salmonella infection	236	0.35599	1.19485	0.103166	0.222307	0.141526	4507	tags=26%, list=26%, signal=19%	24494/24835/500377/24498/310553/192181/25493/78971/25166/289337/500319/500363/500906/315139/24383/681314/500133/29513/294691/298784/297173/679312/298947/25272/161452/316226/310460/56611/24699/191568/366508/29260/24516/290604/25310/191572/29213/501854/116720/282817/362298/315348/301059/362491/314322/301252/60350/64044/289759/170851/305341/60371/116691/114555/311245/140654/311786/690743/448830/5422…	Il1b/Tnf/Tuba8/Il6/Tlr2/Podxl/Nfkbia/Birc3/Casp1/Tlr5/Tuba3a/Tuba3b/Cyth4/Tab1/Gapdh/Bax-ps2/Nod1/Mapk13/Naip5/Nlrc4/RSA-14-44/Tubb1/Pik3cg/Mapk10/Lef1/Klc4/Arhgef26/Anxa2/Ptprc/Naip6/Pik3cd/Tlr4/Jun/Gapdhl10/Cyct/Ahnak/Tubb4a/Rab7b/Pik3c2g/Pycard/Actr3b/Nckap1l/Myd88/Ripk2/Fos/Hsp90ab1/Cd14/Casp8/Myl7/Map2k1/Rhoh/Birc2/Cyth1/Casp4/Traf6/Rps3/Traf2/Mlkl/Ly96/Arpc1b/Rras
rno01524	Platinum drug resistance	73	0.429236	1.29506	0.104583	0.222502	0.141649	4200	tags=38%, list=24%, signal=29%	24218/24421/78971/64625/681314/25303/314856/317673/29487/501110/300850/498340/25385/366508/25260/365057/24426/298074/295037/25310/24941/114851/171341/246097/64044/24423/24842/60371	Atp7b/Gsta1/Birc3/Bid/Bax-ps2/Abcc2/Mdm2/Bbc3/Gstt2/Gsta6/Gsta4/Mgst3l1/Faslg/Pik3cd/Gstt1/Map3k5/Gstp1/Xpa/Mgst2/Cyct/Atp7a/Cdkn1a/Mgst1/Fas/Casp8/Gstm1/Tp53/Birc2
rno04932	Non-alcoholic fatty liver disease	145	0.377417	1.23038	0.104589	0.222502	0.141649	2800	tags=17%, list=16%, signal=14%	24494/100362331/24835/24493/84683/24498/64625/681314/29513/64562/89829/24651/24536/24499/25520/29467/25272/25385/366508/365057/24516/64547/58852/120099907	Il1b/Ndufa4l2/Tnf/Il1a/Cox4i2/Il6/Bid/Bax-ps2/Mapk13/Prkab2/Socs3/Pklr/Lepr/Il6r/Prkag1/Ddit3/Mapk10/Faslg/Pik3cd/Map3k5/Jun/Bcl2l11/Nr1h3/LOC120099907
rno05207	Chemical carcinogenesis - receptor activation	182	0.365159	1.20572	0.10718	0.22657	0.14424	3611	tags=32%, list=21%, signal=26%	24296/25590/24925/24421/25645/29368/83785/24881/83574/24208/100314007/25426/25387/29716/114505/257648/59110/100314213/367808/314638/24300/84410/100313993/100314277/100526572/114493/29487/501110/300850/498340/29241/84010/25023/100314224/366508/25260/24681/100313990/25444/24514/295037/64532/24516/25398/66017/690504/100526599/65030/366836/171341/54239/303836/81771/363984/54250/314322/29348/301252	Cyp1a1/Chrna4/Adrb1/Gsta1/Adrb3/Fgf17/Vegfa/Wnt1/Rxrg/Ar/Mir29b2/Cyp1b1/Arrb1/Cacna1d/Klf4/Cacna1b/Aipl1/Mirlet7a1/Ptges3l1/Creb3l3/Cyp2b1/Klf5/Mirlet7i/Mirlet7f-1os/Mir3556b/Cacna1f/Gstt2/Gsta6/Gsta4/Mgst3l1/Adcy8/Dll1/Prkcb/Mirlet7c2/Pik3cd/Gstt1/Prkcg/Mirlet7b/Fgf9/Jak2/Mgst2/Adcy5/Jun/Cacna1a/Fgf20/Kpna7/Mir3596c/Ephx2/Ephx3/Mgst1/Chrnb2/Bcl6/Rps6ka1/Ikbke/Fgf2/Fos/Fgf7/Hsp90ab1
rno00380	Tryptophan metabolism	40	0.487086	1.33321	0.108835	0.228622	0.145545	3605	tags=38%, list=21%, signal=30%	24296/25120/54349/25426/316421/24248/681319/287305/312317/24848/29416/688283/59113/24311/316424	Cyp1a1/Aanat/Aox1/Cyp1b1/Aox2/Cat/Ido2/4930438A08Rikl/Doxl2/Tph1/Aadat/Afmid/Kmo/Ddc/Aox4
rno00520	Amino sugar and nucleotide sugar metabolism	37	0.493228	1.33957	0.112245	0.234311	0.149168	2297	tags=24%, list=13%, signal=21%	25060/25059/292804/24385/24645/25058/294673/83472/289827	Hk3/Hk2/Gpi/Gck/Pgm1/Hk1/Hexb/Ugdh/Ugp2
rno00670	One carbon pool by folate	33	-0.394569	-1.29611	0.114035	0.234942	0.149569	4539	tags=52%, list=26%, signal=38%	114123/298942/29443/171133/81522/24250/81643/299699/29261/680308/25134/288259/24312/287379/64300/24962/25331	Sardh/Dld/Ahcy/Gcsh/Mtr/Cbs/Atic/Aldh1l2/Tyms/Mthfd2/Gnmt/Gart/Dhfr/Shmt1/Mthfd1/Cth/Mat1a
rno00040	Pentose and glucuronate interconversions	20	0.564435	1.37079	0.114441	0.234942	0.149569	2297	tags=30%, list=13%, signal=26%	286921/296972/116463/316067/83472/289827	Akr1b8/Akr1b10/Akr1b7/Xylb/Ugdh/Ugp2
rno05211	Renal cell carcinoma	68	0.425126	1.2737	0.114657	0.234942	0.149569	2261	tags=16%, list=13%, signal=14%	54702/24778/308913/83785/296078/29452/24827/24628/103691088/366508/24874	Egln3/Slc2a1/Egln1/Vegfa/Pak6/Epas1/Tgfa/Pdgfb/Elocl1/Pik3cd/Vhl
rno05414	Dilated cardiomyopathy	95	-0.27969	-1.14786	0.115802	0.23584	0.150141	2323	tags=32%, list=13%, signal=28%	25437/305941/140447/25717/24482/29693/315744/24852/25713/29161/117557/24598/116600/84015/316758/500450/24239/295929/81822/311061/116601/24851/24837/311144/290561/299940/114517/29715/364786/29557	Emd/Sgcg/Slc8a2/Tgfb3/Igf1/Atp2a2/Itga11/Tpm4/Itgb7/Cav3/Tpm3/Nos1/Cacnb2/Ttn/Lama1/Tpm2/Cacna1c/Mybpc3/Actb/Itgb6/Atp2a1/Tpm1/Tnnt2/Itga4/Tnnc1/Sntb1/Itga6/Slc8a1/Itga8/Myh7
rno04520	Adherens junction	87	-0.289871	-1.16803	0.117734	0.238323	0.151721	2616	tags=22%, list=15%, signal=19%	287876/682937/288124/501203/362317/26955/314843/81634/24329/63836/361084/294568/25554/305679/361839/81822/297357/24553/296313	Actg1/Wasf3/Nectin3/Myl12a/Krit1/Afdn/Ptprb/Actn1/Egfr/Actn4/Lmo7/Wasf1/Snai2/Vcl/Ctnna3/Actb/Ctnna2/Met/Myl9
rno00760	Nicotinate and nicotinamide metabolism	38	0.484665	1.32032	0.119078	0.23888	0.152076	3774	tags=42%, list=22%, signal=33%	293504/54349/297508/363118/292875/365699/316421/298881/100360582/100912521/499330/58813/54410/304539/316424/361532	Qprt/Aox1/Nampt/Nmnat3/Aspdh/Nadk2/Aox2/Nt5c1b/Nt5c/Nmrk2/Nmrk1/Nt5e/Enpp3/Sirt4/Aox4/Sirt2
rno00260	Glycine, serine and threonine metabolism	34	-0.389187	-1.29019	0.119469	0.23888	0.152076	1331	tags=32%, list=8%, signal=30%	293820/25257/296973/25134/25750/58835/287379/303272/24962/304429/25748	Psat1/Gamt/Bpgm/Gnmt/Maob/Phgdh/Shmt1/Pipox/Cth/Psph/Alas2
rno04710	Circadian rhythm	33	0.500532	1.33163	0.120155	0.23888	0.152076	1872	tags=27%, list=11%, signal=24%	306750/79431/316351/252917/300807/64562/25520/24309/114519	Fbxl21/Bhlhe40/Npas2/Nr1d1/Rora/Prkab2/Prkag1/Dbp/Nfil3
rno00140	Steroid hormone biosynthesis	37	0.483489	1.31312	0.123724	0.244521	0.155667	1618	tags=27%, list=9%, signal=25%	292915/25116/24296/361267/25147/171522/25426/361802/24300/117182	Sult2b1/Hsd11b1/Cyp1a1/Akr1c15/Cyp19a1/Cyp2d4/Cyp1b1/Hsd17b8/Cyp2b1/Hsd17b3
rno02010	ABC transporters	47	0.447091	1.269	0.134639	0.264526	0.168403	1481	tags=23%, list=9%, signal=21%	310836/287112/85264/81642/170913/24646/24891/24812/25303/24811/83569	Abca4/Abca17/Abcg1/Abcc6/Abcb1a/Abcb1b/Abcb4/Tap2/Abcc2/Tap1/Abcb11
rno04928	Parathyroid hormone synthesis, secretion and action	106	0.382438	1.20795	0.137817	0.269186	0.17137	2613	tags=21%, list=15%, signal=18%	171052/80722/84395/83574/25279/170583/290646/25387/24330/25548/297173/314638/303634/29241/293649/306811/25023/25679/24681/114700/64532/24695	Mmp13/Sost/Slc34a2/Rxrg/Cyp24a1/Fgf23/Pde4c/Arrb1/Egr1/Slc34a1/RSA-14-44/Creb3l3/Gna13/Adcy8/Lrp5/Wnk2/Prkcb/Itpr3/Prkcg/Cyp27b1/Adcy5/Pthlh
rno03022	Basal transcription factors	41	-0.332273	-1.1842	0.140845	0.273501	0.174117	6153	tags=66%, list=35%, signal=43%	294693/294018/316216/353256/502227/288651/291773/171152/81673/83830/287571/307927/291703/303433/288533/310784/117526/317256/309194/682902/293345/170844/171150/83828/308415/81674/303918	Gtf2h2/Taf5/Taf8/Gtf2i/Gtf2h5/Gtf2h3/Taf4b/Taf9b/Gtf2b/Gtf2a1/Taf15/Taf5l1/Ercc3/Taf11l1/Taf6/Taf13/Tbp/Taf1/Taf6l/Taf12/Taf10/Taf2/Cdk7/Gtf2a2/Ercc2/Gtf2f2/Gtf2e1
rno04728	Dopaminergic synapse	119	0.374974	1.20053	0.142391	0.274906	0.175011	2150	tags=18%, list=12%, signal=16%	24409/117256/24316/25432/29713/50599/80850/25387/29716/29513/64199/257648/25085/116560/314638/360616/50664/25272/25023/25679/50592/24681	Grin2a/Ppp2r2c/Drd1/Drd4/Kcnj5/Kcnj3/Gng2/Arrb1/Cacna1d/Mapk13/Gng11/Cacna1b/Th/Kcnj9/Creb3l3/Ppp1r1b/Gnao1/Mapk10/Prkcb/Itpr3/Gria1/Prkcg
rno04370	VEGF signaling pathway	55	0.427464	1.24261	0.14372	0.275876	0.175629	2565	tags=25%, list=15%, signal=22%	24600/29527/83785/29513/366957/691905/691907/25023/366508/24681/29337/311341/311658/688319	Nos3/Ptgs2/Vegfa/Mapk13/Rac2/Pla2g4d/Pla2g4f/Prkcb/Pik3cd/Prkcg/Plcg2/Pla2g4b/Nfatc2/Rac3
rno04923	Regulation of lipolysis in adipocytes	52	0.432479	1.24404	0.145103	0.276939	0.176305	2982	tags=29%, list=17%, signal=24%	79451/29527/24925/25645/29290/24603/25653/24693/116700/29241/366508/25523/64532/500292/25629	Fabp4/Ptgs2/Adrb1/Adrb3/Adora1/Npr1/Tshb/Ptgs1/Cga/Adcy8/Pik3cd/Prkg2/Adcy5/Cidec/Plin1
rno04920	Adipocytokine signaling pathway	67	0.40992	1.2245	0.15684	0.297639	0.189483	1863	tags=21%, list=11%, signal=19%	24835/24778/83516/25493/83574/156767/64562/89829/116719/24536/25520/316241/25139/25272	Tnf/Slc2a1/Ppargc1a/Nfkbia/Rxrg/Tnfrsf1b/Prkab2/Socs3/Acacb/Lepr/Prkag1/Nfkbie/Slc2a4/Mapk10
rno00360	Phenylalanine metabolism	16	0.558884	1.29543	0.158931	0.299904	0.190925	3573	tags=38%, list=21%, signal=30%	25375/366675/81683/287305/688800/24311	Aldh3a1/Mifl3/Mif/4930438A08Rikl/Aldh3b2/Ddc
rno04976	Bile secretion	63	0.413019	1.22204	0.160864	0.301847	0.192162	4363	tags=37%, list=25%, signal=27%	24778/25552/170913/24646/24891/25303/24784/83569/24214/29241/29639/29725/64532/65054/84396/303879/54262/297386/24861/24777/300790/60351/24213	Slc2a1/Slc5a1/Abcb1a/Abcb1b/Abcb4/Abcc2/Slc9a3/Abcb11/Atp1b2/Adcy8/Fxyd2/Baat/Adcy5/Aqp9/Atp1b4/Slc51a/Kcnn2/Slc4a5/Ugt1a1/Slc10a1/Slc51b/Nr1h4/Atp1a3
rno04974	Protein digestion and absorption	90	0.385109	1.20233	0.16198	0.302242	0.192413	3354	tags=30%, list=19%, signal=24%	25550/246235/65206/315071/315981/302668/311716/24784/24269/687064/24214/315979/312115/363265/25253/29639/305104/117522/24291/117261/303148/84396/25412/367313/301012/294027/116726	Slc1a1/Slc36a2/Kcnn4/Col22a1/Col6a4/Ace2/Col20a1/Slc9a3/Cpa1/Col25a1/Atp1b2/Col6a6/Col28a1/Col4a3/Dpp4/Fxyd2/Col9a1/Xpnpep2/Ctrb1/Slc15a1/Slc36a3/Atp1b4/Col2a1/Col6a3/Col7a1/Col17a1/Slc7a9
rno03082	ATP-dependent chromatin remodeling	103	-0.272622	-1.1137	0.163581	0.303534	0.193236	5920	tags=50%, list=34%, signal=33%	303518/362132/307766/29384/363002/361652/498753/317575/297893/361295/304569/291691/368001/293514/117535/297867/685179/313048/308067/368002/84576/311713/306254/361724/362834/362258/65137/312154/310661/362594/361374/171379/301020/83712/303241/282546/287876/298098/314126/299810/361925/291737/360804/84577/300222/500987/50545/58940/361844/290669/81822/299186	Smarce1/Epc2/Smarca5/Macroh2a1/Smarcd1/Srcap/Hist1h2af/Smarca1/Hdac1/Ss18/Ep400/Brd8/Bcl7b/Bcl7c/Chd4/Arid1a/Smarcc2/Rbbp4/Brd9/Baz1b/Hdac1l/Mrgbp/Pbrm1/Mta2/Mbd3/Actr5/Ruvbl1/Ing3/Vps72/Meaf6/Brd7/Smarca4/Smarcc1/Rbbp7/Chd3/Arid1b/Actg1/Pole3/Baz1a/Yeats4/Actl6a/Ino80c/Cdk2ap1/Hdac2/Mcrs1/H2ax/Dpf1/H2az1/Macroh2a2/Gatad2a/Actb/Dpf3
rno05032	Morphine addiction	74	0.402299	1.21761	0.16472	0.303958	0.193506	3336	tags=32%, list=19%, signal=26%	24316/29713/50599/80850/290646/83633/25387/64199/29290/257648/116560/29695/50664/140929/29241/25023/24681/81743/64532/25398/24922/65191/24947/63885	Drd1/Kcnj5/Kcnj3/Gng2/Pde4c/Gabbr2/Arrb1/Gng11/Adora1/Cacna1b/Kcnj9/Gabrr2/Gnao1/Pde7b/Adcy8/Prkcb/Prkcg/Pde2a/Adcy5/Cacna1a/Gabrb3/Gabre/Gabra3/Pde10a
rno00650	Butanoate metabolism	22	-0.422258	-1.27463	0.16791	0.308143	0.196171	2344	tags=32%, list=14%, signal=28%	29637/690163/365096/308100/65984/81632/353317	Hmgcs1/Oxct1/Acat2l1/Acat2/Aacs/Abat/Acsm4
rno00983	Drug metabolism - other enzymes	61	0.412713	1.21687	0.169249	0.308903	0.196654	2726	tags=26%, list=16%, signal=22%	679817/289801/362638/24421/29225/501232/24346/29487/501110/300850/498340/25260/24426/497811/295037/688542	Ces1a/Upp1/Cda/Gsta1/Ces1e/Cesl1/Ces1c/Gstt2/Gsta6/Gsta4/Mgst3l1/Gstt1/Gstp1/Xdh/Mgst2/Ces2el1
rno04727	GABAergic synapse	71	0.400113	1.2023	0.175563	0.317314	0.202009	3912	tags=38%, list=23%, signal=30%	29430/80850/50676/83633/29716/64199/257648/29695/689161/50664/114493/29241/171373/25023/24681/64845/252919/64532/25398/24379/24922/65191/24947/192268/192208/60355/114120	Hap1/Gng2/Slc6a12/Gabbr2/Cacna1d/Gng11/Cacna1b/Gabrr2/Gabarapl1/Gnao1/Cacna1f/Adcy8/Slc12a5/Prkcb/Prkcg/Gphn/Slc38a3/Adcy5/Cacna1a/Gad1/Gabrb3/Gabre/Gabra3/Gls2/Slc38a5/Nsf/Gng12
rno05010	Alzheimer disease	354	0.331545	1.12974	0.175758	0.317314	0.202009	2115	tags=12%, list=12%, signal=11%	24599/24494/100362331/29477/24835/24493/300802/500377/24411/84683/24498/24408/29527/315294/24409/84426/24881/500319/500363/316526/64625/78965/300051/24383/29716/140584/66021/679312/306009/116671/29467/114493/114243/25272/360827/316226/293649/25679/282582/366508/29219/81751	Nos2/Il1b/Ndufa4l2/Mapt/Tnf/Il1a/Aph1b/Tuba8/Grin2c/Cox4i2/Il6/Grin1/Ptgs2/Wnt10b/Grin2a/Wnt4/Wnt1/Tuba3a/Tuba3b/Wnt6/Bid/Csf1/Slc39a4/Gapdh/Cacna1d/Wnt11/Cybb/Tubb1/Slc39a14/Cdk5r1/Ddit3/Cacna1f/Nox1/Mapk10/Ulk1/Klc4/Lrp5/Itpr3/Wnt5b/Pik3cd/Snca/Psen2
rno04210	Apoptosis	123	0.363646	1.16783	0.177489	0.318717	0.202902	4360	tags=31%, list=25%, signal=23%	59109/24835/500377/25493/78971/500319/500363/64625/681314/171081/317673/29467/25272/687813/25679/25385/366508/365057/684529/24516/64547/25310/170929/25425/25112/361704/314322/498013/246097/64044/171293/170851/85383/24842/60371/50654/362100/311786	Ntrk1/Tnf/Tuba8/Nfkbia/Birc3/Tuba3a/Tuba3b/Bid/Bax-ps2/Csf2rb/Bbc3/Ddit3/Mapk10/Traf1/Itpr3/Faslg/Pik3cd/Map3k5/Ctso/Jun/Bcl2l11/Cyct/Bcl2a1/Ctsh/Gadd45a/Ctsf/Fos/Ern1/Fas/Casp8/Ctsd/Map2k1/Nol3/Tp53/Birc2/Ctss/Endog/Traf2
rno05205	Proteoglycans in cancer	189	0.346238	1.14727	0.180311	0.322053	0.205026	2369	tags=17%, list=14%, signal=15%	81687/64546/24835/64537/310553/315294/83785/295378/84426/24881/170921/24771/100314000/316526/29513/29139/140584/314856/297173/59327/25156/360482/29169/25023/25679/25385/282582/366508/24681/29337/54319/116689/29260	Mmp9/Il12b/Tnf/Hpse/Tlr2/Wnt10b/Vegfa/Vav3/Wnt4/Wnt1/Itga2/Sdc4/Mir21/Wnt6/Mapk13/Dcn/Wnt11/Mdm2/RSA-14-44/Twist2/Vav1/Tfap4/Vtn/Prkcb/Itpr3/Faslg/Wnt5b/Pik3cd/Prkcg/Plcg2/Ezr/Ptpn6/Tlr4
rno04721	Synaptic vesicle cycle	65	0.40375	1.19748	0.184304	0.326317	0.20774	2791	tags=26%, list=16%, signal=22%	84012/25550/29482/50676/25716/25553/116638/257648/83511/64830/312488/64829/140694/25012/29757/25398/103690878	Slc1a6/Slc1a1/Slc1a2/Slc6a12/Syt1/Slc6a4/Slc17a7/Cacna1b/Slc6a2/Unc13b/Atp6v1b1/Unc13a/Dnm1/Snap25/Atp6v0a1/Cacna1a/LOC103690878
rno05031	Amphetamine addiction	62	0.408468	1.20582	0.184652	0.326317	0.20774	2611	tags=23%, list=15%, signal=19%	24411/24408/24409/24316/29716/25085/314638/360616/25050/25023/50592/24681/64532/24516	Grin2c/Grin1/Grin2a/Drd1/Cacna1d/Th/Creb3l3/Ppp1r1b/Camk4/Prkcb/Gria1/Prkcg/Adcy5/Jun
rno05165	Human papillomavirus infection	310	0.33268	1.12795	0.185787	0.326594	0.207917	2362	tags=18%, list=14%, signal=16%	64628/414789/414791/24835/29527/414819/414779/315294/117256/310683/305078/294228/406162/83785/304545/84426/309603/24881/170921/25353/315981/316526/25630/309368/29220/681314/25724/679028/83571/140584/314856/79225/286918/100362738/314638/362279/312488/360323/315979/311862/24508/24747/29169/363265/25385/282582/363328/366508/25304/83615/365527/305104/81008/116669/364594	Hes3/RT1-CE15/RT1-CE11/Tnf/Ptgs2/RT1-CE16/RT1-CE2/Wnt10b/Ppp2r2c/Itga10/Lamb3/RT1-S3/Notch4/Vegfa/Oasl/Wnt4/RT1-CE1/Wnt1/Itga2/Spp1/Col6a4/Wnt6/Pkm/Lama2/Thbs4/Bax-ps2/Itgb4/Rbpj/Cdkn1b/Wnt11/Mdm2/Hes5/Mx2/Pkml1/Creb3l3/Pard6b/Atp6v1b1/RT1-N2/Col6a6/Lamc3/Irf1/RT1-M3-1/Vtn/Col4a3/Faslg/Wnt5b/Ticam1/Pik3cd/Comp/Atp6ap1/RT1-M6-2/Col9a1/Itga7/Vwf/Tlr3
rno04260	Cardiac muscle contraction	76	-0.285448	-1.13475	0.188406	0.32874	0.209283	2503	tags=28%, list=14%, signal=24%	59299/25650/29132/300047/140447/26198/26192/29693/24852/117557/292905/116600/500450/24239/116601/24851/24837/290561/29715/29209/29557	Trdn/Atp1b1/Atp1a4/Cyc1/Slc8a2/COX2/CYTB/Atp2a2/Tpm4/Tpm3/Hrc/Cacnb2/Tpm2/Cacna1c/Atp2a1/Tpm1/Tnnt2/Tnnc1/Slc8a1/Casq2/Myh7
rno01522	Endocrine resistance	91	0.376489	1.17445	0.188976	0.32874	0.209283	3568	tags=24%, list=21%, signal=19%	81687/114496/29147/406162/679845/681314/29513/83571/314856/83569/25272/29241/84010/366508/64532/24516/114851/25433/314612/114858/81686/314322	Mmp9/Bik/Jag2/Notch4/Shc4/Bax-ps2/Mapk13/Cdkn1b/Mdm2/Abcb11/Mapk10/Adcy8/Dll1/Pik3cd/Adcy5/Jun/Cdkn1a/Hbegf/Shc2/Shc3/Mmp2/Fos
rno04915	Estrogen signaling pathway	108	0.369339	1.17125	0.19163	0.331086	0.210777	3997	tags=30%, list=23%, signal=23%	81687/24600/24414/24472/29713/50599/294853/360625/83633/679845/287700/116560/314638/24827/50664/287702/29241/25679/366508/170538/64532/24516/25433/314612/114858/24705/81686/314322/301252/171293/24790/170851	Mmp9/Nos3/Grm1/Hspa1a/Kcnj5/Kcnj3/Krt18/Krt12/Gabbr2/Shc4/Krt15/Kcnj9/Creb3l3/Tgfa/Gnao1/Krt17/Adcy8/Itpr3/Pik3cd/Prkcd/Adcy5/Jun/Hbegf/Shc2/Shc3/Rara/Mmp2/Fos/Hsp90ab1/Ctsd/Sp1/Map2k1
rno00591	Linoleic acid metabolism	25	0.493844	1.25323	0.192308	0.331086	0.210777	2300	tags=36%, list=13%, signal=31%	29692/29354/298581/29387/691905/81639/691907/29526/311341	Pla2g2a/Pla2g5/Pla2g2e/Pla2g2c/Pla2g4d/Alox15/Pla2g4f/Pla2g1b/Pla2g4b
rno05215	Prostate cancer	98	0.373964	1.17748	0.194292	0.332787	0.21186	2770	tags=21%, list=16%, signal=18%	81687/60663/171045/25493/24414/24208/83571/314856/293154/314638/171049/24827/24628/161452/25692/366508/24426/25267/311331/303828/24418	Mmp9/Insrr/Mmp3/Nfkbia/Grm1/Ar/Cdkn1b/Mdm2/Folr2/Creb3l3/Folr1/Tgfa/Pdgfb/Lef1/Plat/Pik3cd/Gstp1/Pdgfra/Spint1/Etv5/Grm5
rno00515	Mannose type O-glycan biosynthesis	22	-0.410151	-1.23808	0.197761	0.337001	0.214542	2796	tags=50%, list=16%, signal=42%	306549/293667/84430/316091/303693/493574/313536/308390/362567/361368/311202	Pomk/B4gat1/Pomt1/Pomgnt2/Mgat5b/Crppa/B4galt2/Fkrp/Pomgnt1/Large1/Large2
rno05204	Chemical carcinogenesis - DNA adducts	41	0.438671	1.20734	0.209125	0.354558	0.225719	2562	tags=29%, list=15%, signal=25%	25116/24296/29527/24421/25426/29487/501110/300850/498340/25260/24426/295037	Hsd11b1/Cyp1a1/Ptgs2/Gsta1/Cyp1b1/Gstt2/Gsta6/Gsta4/Mgst3l1/Gstt1/Gstp1/Mgst2
rno04970	Salivary secretion	69	0.390191	1.17268	0.211765	0.355446	0.226284	3052	tags=29%, list=18%, signal=24%	65206/24925/25645/309114/316010/83731/364973/691970/29412/24214/29241/25023/25679/25523/24681/29639/64532/362881/84396/24203	Kcnn4/Adrb1/Adrb3/Muc5b/Camp/Kcnma1/Best2/Dmbt1l1/Adra1a/Atp1b2/Adcy8/Prkcb/Itpr3/Prkg2/Prkcg/Fxyd2/Adcy5/RGD1306474/Atp1b4/Amy1
rno00770	Pantothenate and CoA biosynthesis	20	-0.406946	-1.19397	0.212687	0.355446	0.226284	570	tags=50%, list=3%, signal=48%	29592/363069/65183/64203/298490/85496/360511/81656/65135/367181	Bcat1/Ppcdc/Aldh3a2/Bcat2/Ppcs/Enpp1/Pank3/Dpyd/Dpys/Gadl1
rno04917	Prolactin signaling pathway	65	0.395177	1.17206	0.212842	0.355446	0.226284	3697	tags=31%, list=21%, signal=24%	366142/24385/679845/29513/83681/89829/25085/294515/24508/116700/25272/366508/24514/84607/24657/25329/314612/114858/314322/24918	Elf5/Gck/Shc4/Mapk13/Cish/Socs3/Th/Foxo3/Irf1/Cga/Mapk10/Pik3cd/Jak2/Socs2/Prl6a1/Lhb/Shc2/Shc3/Fos/Stat5a
rno00562	Inositol phosphate metabolism	78	0.379253	1.15878	0.221584	0.368205	0.234407	4784	tags=35%, list=28%, signal=25%	500709/687758/24849/498731/171458/306490/500959/81677/252899/290651/54259/298947/366508/497197/29337/309855/116720/312634/83523/313756/309419/24655/25738/64161/282636/89812/287533	Itpk1/Pip5kl1/Tpi1/Tpi1l2/Ipmk/Mtmr7/Tpi1l1/Itpka/Miox/Isyna1/Inpp5d/Pik3cg/Pik3cd/Plcz1/Plcg2/Fig4/Pik3c2g/Mtmr14/Impa1/Plch2/Pip5k1b/Plcd1/Plcg1/Pi4ka/Impa2/Pip4k2b/Inpp5k
rno05222	Small cell lung cancer	90	0.368611	1.15083	0.224972	0.370588	0.235924	2331	tags=17%, list=13%, signal=15%	24599/29527/305078/25493/78971/170921/83574/309368/681314/83571/311862/363265/687813/366508/100362121	Nos2/Ptgs2/Lamb3/Nfkbia/Birc3/Itga2/Rxrg/Lama2/Bax-ps2/Cdkn1b/Lamc3/Col4a3/Traf1/Pik3cd/Ddb2
rno04371	Apelin signaling pathway	125	0.355233	1.14064	0.225352	0.370588	0.235924	2118	tags=18%, list=12%, signal=16%	24599/58812/83516/24600/24585/80850/25353/64562/24330/114207/64199/25520/24860/25050/298947/303634/29241/498607/25679/25692/306330/24617	Nos2/Apln/Ppargc1a/Nos3/Myl3/Gng2/Spp1/Prkab2/Egr1/Ryr1/Gng11/Prkag1/Ucp1/Camk4/Pik3cg/Gna13/Adcy8/Mef2b/Itpr3/Plat/Klf2/Serpine1
rno04720	Long-term potentiation	60	0.39353	1.15498	0.226347	0.370588	0.235924	2150	tags=18%, list=12%, signal=16%	24411/24408/24409/24414/59326/25050/29241/25023/25679/50592/24681	Grin2c/Grin1/Grin2a/Grm1/Rapgef3/Camk4/Adcy8/Prkcb/Itpr3/Gria1/Prkcg
rno04213	Longevity regulating pathway - multiple species	57	-0.2909	-1.09994	0.231214	0.376709	0.239821	2030	tags=21%, list=12%, signal=19%	24482/84577/24963/56718/25467/367858/24185/309757/25420/60664/78975/301518	Igf1/Hdac2/Hspa1l/Mtor/Irs1/Hrasl1/Akt1/Sirt1/Cryab/Pik3r3/Prkaa2/Prkag3
rno01210	2-Oxocarboxylic acid metabolism	29	-0.360871	-1.15196	0.23431	0.377573	0.240371	5401	tags=62%, list=31%, signal=43%	29592/300981/170587/361272/64203/298942/79250/114096/299201/360975/29711/81654/361596/289950/306540/50655/29611/81670	Bcat1/Acy1/Cs/Dhtkd1/Bcat2/Dld/Aco2/Idh3a/Dlst/Ogdh/Bckdhb/Dlat/Idh2/Pdhb/Got1l1/Aco1/Dbt/Gpt
rno00601	Glycosphingolipid biosynthesis - lacto and neolacto series	23	0.481127	1.19104	0.235135	0.377573	0.240371	3817	tags=35%, list=22%, signal=27%	290638/25280/58924/688155/306860/296564/303923/308586	B3gnt3/St8sia1/Fut2/B4galnt2/Gcnt2/Fut7/B4galt4/Sec1
rno04977	Vitamin digestion and absorption	23	0.481222	1.19127	0.235135	0.377573	0.240371	2352	tags=22%, list=14%, signal=19%	314459/24710/289175/80848/50621	Amn/Rbp2/Slc19a2/Cubn/Slc23a1
rno04921	Oxytocin signaling pathway	138	0.348098	1.12873	0.237124	0.378945	0.241245	2707	tags=24%, list=16%, signal=20%	171358/116649/24600/29527/29713/50599/294329/140729/29716/64562/114207/691905/116560/24603/25520/297173/691907/140725/50664/25050/298947/114493/29241/25023/25679/24681/311341/311658/64532/83506/24516/58942/140726	Camk1g/Kcnj4/Nos3/Ptgs2/Kcnj5/Kcnj3/Trpm2/Cacng8/Cacna1d/Prkab2/Ryr1/Pla2g4d/Kcnj9/Npr1/Prkag1/RSA-14-44/Pla2g4f/Cacng4/Gnao1/Camk4/Pik3cg/Cacna1f/Adcy8/Prkcb/Itpr3/Prkcg/Pla2g4b/Nfatc2/Adcy5/Camkk2/Jun/Cacnb4/Cacng5
rno04980	Cobalamin transport and metabolism	17	-0.421052	-1.17526	0.242857	0.385072	0.245145	1687	tags=24%, list=10%, signal=21%	299196/363519/313520/29319	Abcd4/Hcfc1/Mmachc/Cblif
rno05033	Nicotine addiction	27	0.463532	1.18721	0.243709	0.385072	0.245145	3314	tags=48%, list=19%, signal=39%	24411/24408/25590/24409/116638/257648/29695/50592/25398/24922/65191/54239/24947	Grin2c/Grin1/Chrna4/Grin2a/Slc17a7/Cacna1b/Gabrr2/Gria1/Cacna1a/Gabrb3/Gabre/Chrnb2/Gabra3
rno00071	Fatty acid degradation	44	0.416052	1.16905	0.244417	0.385072	0.245145	464	tags=7%, list=3%, signal=7%	24172/310903/171178	Adh1c/Adh6/Adh7
rno04670	Leukocyte transendothelial migration	103	0.357346	1.13038	0.249177	0.389632	0.248048	2298	tags=23%, list=13%, signal=20%	81687/65129/60628/295378/500904/25021/29583/29513/309684/366957/59326/66021/297173/619374/25156/364018/680489/25464/287098/25023/366508/24681/29337/54319	Mmp9/Cldn1/Cxcr4/Vav3/Ncf4/Itgam/Pecam1/Mapk13/Itgb2/Rac2/Rapgef3/Cybb/RSA-14-44/Jam2/Vav1/Ncf2/Cldn34e/Icam1/Cldn6/Prkcb/Pik3cd/Prkcg/Plcg2/Ezr
rno04068	FoxO signaling pathway	124	0.350375	1.1234	0.250542	0.389632	0.248048	2273	tags=19%, list=13%, signal=16%	24498/25325/84480/313558/294797/29157/24414/500300/29513/64562/294515/83571/314856/25520/689161/24787/25139/24248/25272/25385/306330/366508/171043	Il6/Il10/Bnip3/Foxo6/Il7r/Ccng2/Grm1/Depp1/Mapk13/Prkab2/Foxo3/Cdkn1b/Mdm2/Prkag1/Gabarapl1/Sod2/Slc2a4/Cat/Mapk10/Faslg/Klf2/Pik3cd/Fbxo32
rno04723	Retrograde endocannabinoid signaling	129	0.34609	1.11589	0.250811	0.389632	0.248048	2800	tags=20%, list=16%, signal=17%	100362331/100911581/29527/24414/29713/50599/80850/29716/29513/116638/64199/257648/116560/29695/50664/114493/25272/29241/25023/25679/50592/24681/64532/25398/24418/120099907	Ndufa4l2/Faah/Ptgs2/Grm1/Kcnj5/Kcnj3/Gng2/Cacna1d/Mapk13/Slc17a7/Gng11/Cacna1b/Kcnj9/Gabrr2/Gnao1/Cacna1f/Mapk10/Adcy8/Prkcb/Itpr3/Gria1/Prkcg/Adcy5/Cacna1a/Grm5/LOC120099907
rno00410	beta-Alanine metabolism	27	-0.35585	-1.11861	0.259109	0.399108	0.254081	1178	tags=26%, list=7%, signal=24%	309150/291394/307212/81656/65135/81632/367181	Carns1/Cndp2/Cndp1/Dpyd/Dpys/Abat/Gadl1
rno04925	Aldosterone synthesis and secretion	89	0.36374	1.13377	0.259301	0.399108	0.254081	2582	tags=19%, list=15%, signal=16%	171358/114862/29713/56827/29716/24603/314638/24214/25050/114493/29241/25023/25679/29717/24681/81743/64532	Camk1g/Cacna1h/Kcnj5/Cacna1i/Cacna1d/Npr1/Creb3l3/Atp1b2/Camk4/Cacna1f/Adcy8/Prkcb/Itpr3/Cacna1g/Prkcg/Pde2a/Adcy5
rno04512	ECM-receptor interaction	83	0.366127	1.12723	0.26484	0.405764	0.258318	3511	tags=34%, list=20%, signal=27%	310683/305078/502858/170921/24771/25353/315981/25312/309368/29220/25724/315979/311862/691992/29169/363265/25304/305104/81008/116669/25406/79110/25412/367313/29302/313641/362800/685269	Itga10/Lamb3/Gp9/Itga2/Sdc4/Spp1/Col6a4/Dmp1/Lama2/Thbs4/Itgb4/Col6a6/Lamc3/Gp1ba/Vtn/Col4a3/Comp/Col9a1/Itga7/Vwf/Cd44/Mepe/Col2a1/Col6a3/Itgb3/Hspg2/Itgb8/Itga2b
rno00531	Glycosaminoglycan degradation	15	0.508475	1.15623	0.272993	0.416345	0.265054	2185	tags=20%, list=13%, signal=17%	64537/294673/363513	Hpse/Hexb/Ids
rno04912	GnRH signaling pathway	83	0.365023	1.12383	0.276256	0.419406	0.267003	3236	tags=23%, list=19%, signal=19%	116667/29716/29513/24330/691905/25194/691907/114493/116700/25272/29241/25023/25679/311341/170538/64532/24516/25433/25329	Map3k1/Cacna1d/Mapk13/Egr1/Pla2g4d/Gnrh1/Pla2g4f/Cacna1f/Cga/Mapk10/Adcy8/Prkcb/Itpr3/Pla2g4b/Prkcd/Adcy5/Jun/Hbegf/Lhb
rno05219	Bladder cancer	37	0.416759	1.13189	0.279337	0.422165	0.268759	1290	tags=14%, list=7%, signal=13%	81687/306722/83785/300339/314856	Mmp9/Dapk1/Vegfa/Mmp1/Mdm2
rno05231	Choline metabolism in cancer	94	0.35231	1.10227	0.297991	0.447321	0.284774	4375	tags=35%, list=25%, signal=26%	29504/295417/366957/303140/691905/246115/691907/24628/64037/294255/25272/25023/366508/24681/362866/311341/29194/25267/286936/688319/24516/367745/140866/314322/309419/24790/85254/170851/29726/116636/25738/361076/24653	Slc22a3/Slc44a3/Rac2/Slc22a21/Pla2g4d/Plpp2/Pla2g4f/Pdgfb/Slc22a4/Slc44a4/Mapk10/Prkcb/Pik3cd/Prkcg/Chpt1/Pla2g4b/Chka/Pdgfra/Pcyt1b/Rac3/Jun/Dgkk/Dgka/Fos/Pip5k1b/Sp1/Slc44a1/Map2k1/Slc22a5/Eif4ebp1/Plcg1/Dgkh/Pla2g4a
rno00240	Pyrimidine metabolism	49	-0.29622	-1.08353	0.298913	0.447321	0.284774	2146	tags=29%, list=12%, signal=25%	24240/29261/290741/497778/191575/685579/362720/64519/192252/81656/316077/65135/313560/24834	Cad/Tyms/Dctd/Dut/Nme1/Rrm1/Rrm2/Entpd1/Dctpp1/Dpyd/Entpd3/Dpys/Ctps1/Tk1
rno04114	Oocyte meiosis	109	-0.256333	-1.06218	0.3	0.447321	0.284774	6240	tags=58%, list=36%, signal=37%	303024/25576/293508/24674/315648/54223/29753/305509/363193/81649/50663/24246/81636/24673/296558/361389/291689/24668/299147/63996/25577/29486/24242/24244/307511/311412/290227/84420/501560/362817/287101/302950/309179/288671/24672/363174/56011/360643/117269/287280/100362453/362356/689314/363088/54237/296137/64193/362485/192209/24482/261730/300121/297176/25154/25203/315330/680006/25262/29749/25515/31…	Fbxw11/Ywhah/Prkacb/Ppp3ca/Ppp2r1b/Adcy4/Ywhae/Adcy1/Ppp2r5d/Mapk14/Calm2/Camk2d/Adcy2/Ppp2cb/Anapc2/Anapc10/Cdc23/Ppp1ca/Ppp2r5e/Smc1a/Ywhaq/Smc3/Calm1/Calm3/Cdc25c/Anapc1/Rec8/Adcy7/Rps6ka3/Cdk2/Pkmyt1/Adcy9/Ppp2r5b/Anapc5/Ppp2ca/Sgo1/Ywhab/Cdc27/Rps6ka2/Skp1/Ppp2cal1/Cul1/Mapk11/Ccnb2/Cdk1/Bub1/Pttg1/Ccne2/Spdya/Igf1/Aurka/Smc1b/Mad2l1/Pgr/Ccnb1/Espl1/Mad1l1/Itpr1/Ppp3r2/Plk1/Rps6ka6/Cdc20/Ccn…
rno04015	Rap1 signaling pathway	197	0.325364	1.08275	0.306186	0.454515	0.289354	4329	tags=31%, list=25%, signal=24%	24408/499537/25369/24409/24596/29368/83785/295378/89805/25021/170583/362799/78965/29513/309684/366957/296269/59326/297173/25156/362279/114705/50664/24628/81511/29316/116546/307171/29241/25023/361314/366508/24681/361442/25444/25267/688319/307403/64532/114110/94268/66017/286975/25589/60427/29302/304109/685269/54250/29348/308995/89804/25261/25482/170851/54355/170901/498609/25738/292771/89807/292658	Grin1/Fyb1/Adora2a/Grin2a/Ngfr/Fgf17/Vegfa/Vav3/Angpt2/Itgam/Fgf23/Rapgef5/Csf1/Mapk13/Itgb2/Rac2/Angpt4/Rapgef3/RSA-14-44/Vav1/Pard6b/Rgs14/Gnao1/Pdgfb/Lat/Adora2b/Ralb/Apbb1ip/Adcy8/Prkcb/Arap3/Pik3cd/Prkcg/Sipa1l2/Fgf9/Pdgfra/Rac3/Csf1r/Adcy5/Flt4/Efna1/Fgf20/Skap1/Kdr/Kitlg/Itgb3/Tiam1/Itga2b/Fgf2/Fgf7/Itgal/Tek/Id1/Mras/Map2k1/Rassf5/Efna3/Lpar2/Plcg1/Sipa1l3/Angpt1/Prkd2
rno00604	Glycosphingolipid biosynthesis - ganglio series	15	0.489537	1.11317	0.318248	0.470331	0.299423	1668	tags=20%, list=10%, signal=18%	25280/364901/294673	St8sia1/St8sia5/Hexb
rno04148	Efferocytosis	151	0.330702	1.08036	0.325606	0.479085	0.304996	4012	tags=30%, list=23%, signal=23%	24336/25325/24778/363578/29527/60587/89808/117264/25166/29583/29513/24253/81639/29221/25246/25027/25290/29597/171109/361929/691517/303313/311287/25528/292844/311658/116689/24514/25277/306600/58852/299714/501854/29302/57027/25145/360426/24335/309527/170897/25682/361400/29364/170851/367318	Epor/Il10/Slc2a1/Havcr2/Ptgs2/Dusp4/Cx3cl1/P2ry6/Casp1/Pecam1/Mapk13/Cebpb/Alox15/Arg1/Bsg/Slc16a1/Alox5/P2ry2/Dusp5/Atp11b/Megf11/Scarf1/Ano3/Sirpa/Siglec10/Nfatc2/Ptpn6/Jak2/Mfge8/Atp11a/Nr1h3/Ano4/Rab7b/Itgb3/Adam17/Cd24/Pla2g6/Epo/Ch25h/Sphk1/Ppard/Nfatc3/Cd47/Map2k1/Ano7
rno05214	Glioma	71	0.360748	1.08401	0.330961	0.484829	0.308652	3434	tags=24%, list=20%, signal=19%	171358/679845/681314/314856/24827/25050/24628/25023/366508/24681/29337/100362121/25267/114851/314612/114858/25112	Camk1g/Shc4/Bax-ps2/Mdm2/Tgfa/Camk4/Pdgfb/Prkcb/Pik3cd/Prkcg/Plcg2/Ddb2/Pdgfra/Cdkn1a/Shc2/Shc3/Gadd45a
rno04146	Peroxisome	80	0.352139	1.07965	0.345934	0.504549	0.321207	4061	tags=28%, list=23%, signal=21%	24599/114027/297570/24787/24248/79238/85249/100363379/497811/29725/117254/65030/367112/84356/288369/113956/282634/114209/297029/501072/361413/113898	Nos2/Dao/Pex26/Sod2/Cat/Hmgcl/Pex11a/Prdx1l1/Xdh/Baat/Prdx1/Ephx2/Hmgcll1/Abcd2/Pex11g/Pecr/Pxmp4/Phyh/Gstk1/Acaa1b/Nudt7/Prdx5
rno01040	Biosynthesis of unsaturated fatty acids	30	0.414982	1.08484	0.356579	0.516796	0.329003	749	tags=13%, list=4%, signal=13%	681337/50559/503049/499358	Acot4/Acot1/Acot5/Scd4
rno00062	Fatty acid elongation	28	0.422728	1.09244	0.357424	0.516796	0.329003	684	tags=11%, list=4%, signal=10%	681337/50559/503049	Acot4/Acot1/Acot5
rno00480	Glutathione metabolism	61	0.362251	1.06809	0.370679	0.53365	0.339733	3836	tags=33%, list=22%, signal=26%	24421/81641/362368/29326/113892/29487/501110/300850/498340/102549803/25260/24426/25283/295037/408206/114020/171341/297029/116686/24423	Gsta1/Anpep/Ggct/Gpx2/Nat8f3/Gstt2/Gsta6/Gsta4/Mgst3l1/Nat8f4/Gstt1/Gstp1/Gclc/Mgst2/Ggt6/Nat8f5/Mgst1/Gstk1/Gsr/Gstm1
rno00513	Various types of N-glycan biosynthesis	44	-0.29044	-1.05258	0.377551	0.54121	0.344546	4148	tags=32%, list=24%, signal=24%	361174/81519/315212/362031/308511/295319/367083/25478/432392/313536/360475/94273/287983/291770	Alg11/Mgat1/Alg12/Alg14/Chst8/Man1a2/Alg9/Man2a1/Fut8/B4galt2/Alg1/Mgat2/Alg3/Chst9
rno04550	Signaling pathways regulating pluripotency of stem cells	122	0.326946	1.04795	0.386957	0.552323	0.35162	2981	tags=22%, list=17%, signal=18%	25587/315294/293847/294503/84426/24881/60584/316526/83711/681178/29513/114505/140584/64549/29381/25366/681740/282582/25196/366508/24514/299766/498299/59112/499593/289316/25231	Id2/Wnt10b/Dusp9/Nodal/Wnt4/Wnt1/Lif/Wnt6/Inhbe/Pcgf5/Mapk13/Klf4/Wnt11/Inhbc/Acvr1b/Acvr2b/Jarid2/Wnt5b/Inhbb/Pik3cd/Jak2/Myf5/Lefty1/Hand1/Sox2/Lefty2/Onecut1
rno05160	Hepatitis C	136	0.321661	1.04113	0.402793	0.572462	0.364442	4640	tags=31%, list=27%, signal=23%	65129/24835/65190/245920/117256/25493/304507/64625/681314/89829/286918/246268/680489/287098/25385/363328/366508/364594/58852/155268/304125/83497/25310/114851/288264/192281/363984/246097/304388/64044/500000/170851/24842/25747/311245/311786/299872/100365062/117104/84351/25621/684111	Cldn1/Tnf/Rsad2/Cxcl10/Ppp2r2c/Nfkbia/Oas1i/Bid/Bax-ps2/Socs3/Mx2/Oas1b/Cldn34e/Cldn6/Faslg/Ticam1/Pik3cd/Tlr3/Nr1h3/Cldn16/Cldn17/Ocln/Cyct/Cdkn1a/Ifnar1/Oas1a/Ikbke/Fas/Cldn15/Casp8/Cldn12/Map2k1/Tp53/Ppara/Traf6/Traf2/Eif3e/Eif3el1/Ppp2r2a/Ikbkb/Cd81/E2f2
rno04979	Cholesterol metabolism	43	0.374895	1.04921	0.404494	0.572462	0.364442	4541	tags=33%, list=26%, signal=24%	362850/100361444/24230/83569/81782/500564/83529/291437/25728/266732/287774/29216/299858/313210	Angptl4/Angptl8/Tspo/Abcb11/Soat1/Ldlrap1/Vdac1/Lipg/Apoe/Npc1/Apoh/Lrp2/Lrp1/Abca1
rno04270	Vascular smooth muscle contraction	123	0.323071	1.03752	0.412338	0.5811	0.369941	2842	tags=26%, list=16%, signal=22%	29692/25026/25369/29354/83731/298581/24241/56820/171519/29387/29716/691905/29412/24603/297173/691907/292661/29316/114493/303634/29241/25023/25679/24681/25029/29526/311341/58965/170538/64532/366270/25105	Pla2g2a/Adm/Adora2a/Pla2g5/Kcnma1/Pla2g2e/Calca/Ramp3/Calcb/Pla2g2c/Cacna1d/Pla2g4d/Adra1a/Npr1/RSA-14-44/Pla2g4f/Ptgir/Adora2b/Cacna1f/Gna13/Adcy8/Prkcb/Itpr3/Prkcg/Calcrl/Pla2g1b/Pla2g4b/Ramp1/Prkcd/Adcy5/Edn3/Nppb
rno04540	Gap junction	81	0.337743	1.03771	0.414384	0.58153	0.370214	2777	tags=21%, list=16%, signal=18%	500377/24925/24316/24414/500319/500363/679312/24628/29241/25023/25679/25523/24681/25267/64532/24418/25187	Tuba8/Adrb1/Drd1/Grm1/Tuba3a/Tuba3b/Tubb1/Pdgfb/Adcy8/Prkcb/Itpr3/Prkg2/Prkcg/Pdgfra/Adcy5/Grm5/Htr2c
rno00250	Alanine, aspartate and glutamate metabolism	31	0.395831	1.04301	0.423027	0.587368	0.373931	3527	tags=26%, list=20%, signal=21%	25698/684425/291133/362428/287305/24379/307759/192268	Ass1/Adss1/Aldh5a1/Rimklb/4930438A08Rikl/Gad1/Gpt2/Gls2
rno04137	Mitophagy - animal	95	0.331229	1.03803	0.423163	0.587368	0.373931	5720	tags=37%, list=33%, signal=25%	499973/84480/294515/140923/689161/246294/25272/360827/24516/501854/113894/50522/689996/100912032/24790/25482/25094/24842/64862/317376/56816/311786/361568/360797/64156/292886/114490/309165/299827/29560/315599/58974/366896/290652/303554	Atg9b/Bnip3/Foxo3/Bnip3l/Gabarapl1/Optn/Mapk10/Ulk1/Jun/Rab7b/Sqstm1/Ubc/Tomm20l/Rps27a/Sp1/Mras/Mitf/Tp53/Map1lc3b/Tfe3/Prkn/Traf2/Rras/Rabgef1/Uba52/Tbc1d17/Cited2/Rela/Tbk1/Hif1a/Nlrx1/Gabarap/Tbc1d15/Fkbp8/Nbr1
rno04934	Cushing syndrome	138	0.318707	1.03343	0.42382	0.587368	0.373931	2084	tags=15%, list=12%, signal=13%	64680/114862/64455/315294/25469/56827/84426/24881/316526/83826/29716/83571/140584/59110/314638/114493/161452/29241/25679/29717/282582	Crhr2/Cacna1h/Rasd1/Wnt10b/Kcna4/Cacna1i/Wnt4/Wnt1/Wnt6/Nr5a1/Cacna1d/Cdkn1b/Wnt11/Aipl1/Creb3l3/Cacna1f/Lef1/Adcy8/Itpr3/Cacna1g/Wnt5b
rno00340	Histidine metabolism	21	0.422434	1.0313	0.428767	0.59177	0.376733	2742	tags=29%, list=16%, signal=24%	29301/25375/299735/24443/688800/312317	Hal/Aldh3a1/Amdhd1/Hdc/Aldh3b2/Doxl2
rno00190	Oxidative phosphorylation	121	-0.234509	-1.00371	0.44186	0.607331	0.38664	6085	tags=51%, list=35%, signal=34%	296658/681418/171374/100911483/116550/299643/65262/100361934/26197/114630/681024/361385/54322/690441/362440/362588/293130/303393/301011/301123/26196/299954/362897/685596/192241/293453/293652/361663/94271/497902/291660/81728/310856/25282/288088/293655/289217/293991/299739/295923/297797/26194/297990/24217/301458/300047/26198/29754/26200/26192/26193/26201/116455/362802/289218/26202/294504/26199/2620…	Ndufa8/Ndufb10/Atp5f1b/Ndufa13/Atp5f1c/Ndufa7/Atp5f1a/Ndufb4l4/ATP6/Atp5mc3/Ndufa4/Ndufb7/Cox6c/Atp5mf/Ndufa9/Ndufs5/Ndufc2/Cox7b/Uqcrc1/Ndufa11/ATP8/Ndufb9/Uqcrb/Uqcrbl1/Atp5po/Ndufab1/Ndufs8/Lhpp/Atp5pf/Uqcrq/Ndufa2/Ndufv2/Ppa2/Cox6a1/Ndufb4/Ndufv1/Sdhc/Ndufb8/Ndufa12/Ndufs3/Atp6v1h/ND2/Ndufb6/Atp4b/Ndufs1/Cyc1/COX2/Atp5mc1/ND4L/CYTB/ND1/ND4/Atp6v0a2/Atp6v1c2/Ndufs2/ND5/Ppa1/ND3/ND6/Atp6v1e2/Cy…
rno05017	Spinocerebellar ataxia	137	0.314079	1.01668	0.447793	0.612207	0.389744	2244	tags=15%, list=13%, signal=13%	24411/84012/117101/24408/24409/24414/29211/300807/679028/114207/60395/25272/360827/25023/25679/366508/50592/24681/365057/25696	Grin2c/Slc1a6/Kcnc3/Grin1/Grin2a/Grm1/Sptbn2/Rora/Rbpj/Ryr1/Trpc3/Mapk10/Ulk1/Prkcb/Itpr3/Pik3cd/Gria1/Prkcg/Map3k5/Vldlr
rno01521	EGFR tyrosine kinase inhibitor resistance	76	0.335091	1.0198	0.449074	0.612207	0.389744	3675	tags=28%, list=21%, signal=22%	24498/83785/679845/681314/294515/24499/24827/24628/432361/25023/366508/24681/29337/24514/25267/64547/25589/314612/114858/54250/29304	Il6/Vegfa/Shc4/Bax-ps2/Foxo3/Il6r/Tgfa/Pdgfb/Nrg2/Prkcb/Pik3cd/Prkcg/Plcg2/Jak2/Pdgfra/Bcl2l11/Kdr/Shc2/Shc3/Fgf2/Rps6
rno03320	PPAR signaling pathway	68	0.338546	1.0143	0.457447	0.621086	0.395397	2982	tags=24%, list=17%, signal=20%	79451/362850/291582/140914/499358/83574/300339/298199/81924/24860/79131/363331/58852/171410/24360/25629	Fabp4/Angptl4/Slc27a6/Olr1/Scd4/Rxrg/Mmp1/Plin2/Cyp8b1/Ucp1/Fabp3/Plin4/Nr1h3/Acsbg1/Fabp1/Plin1
rno04742	Taste transduction	49	0.351911	1.00089	0.469438	0.634786	0.404118	3495	tags=37%, list=20%, signal=29%	24414/554302/83633/500089/170634/497770/29241/25679/25364/63843/24417/25398/293937/100362565/25122/24947/78956/29407	Grm1/Tas2r108/Gabbr2/Tas2r137/Tas1r3/Scn3a/Adcy8/Itpr3/Asic2/P2ry4/Grm4/Cacna1a/Pkd2l1/Pkd1l3/Scnn1a/Gabra3/Scn9a/Tas1r1
rno04740	Olfactory transduction	104	0.318186	1.00539	0.47467	0.639273	0.406975	3007	tags=30%, list=17%, signal=25%	405943/295795/293302/287001/309222/85258/405196/25387/113911/298394/405280/405207/293759/553106/85257/291929/314396/25523/81743/406005/405079/300205/405113/298734/365332/405963/304990/404959/299596/686641/686660	Or5aq7b/Or5aq1b/Or52u1/Or6f2/Or10v1/Cnga4/Olr1675/Arrb1/Gucy2e/Or13c7d/Or7a36/Or13c7e/Or4d11/Ncald/Cnga3/Or7c19/Slc24a4/Prkg2/Pde2a/Olr1585/Or10n1/Or11m3/Or12k5/Or13c7c/Or52h9/Or6c1/Or6k8/Or7a38/Or7a41/Or9m1l1/Or52w1
rno00561	Glycerolipid metabolism	57	0.343627	1.00185	0.47889	0.642367	0.408945	3706	tags=28%, list=21%, signal=22%	286921/305166/296972/116463/313997/246115/313977/362972/681211/170919/367745/117554/291437/140866/362261/363494	Akr1b8/Gpat3/Akr1b10/Akr1b7/Mboat2/Plpp2/Lpin1/Pnpla3/Mogat2/Agpat4/Dgkk/Pnliprp2/Lipg/Dgka/Lpin3/Gla
rno04981	Folate transport and metabolism	22	0.40261	0.987595	0.483651	0.645314	0.410821	1545	tags=23%, list=9%, signal=21%	140860/29509/25303/293154/171049	Slco2b1/Slc22a6/Abcc2/Folr2/Folr1
rno04510	Focal adhesion	195	0.304921	1.01239	0.485477	0.645314	0.410821	2611	tags=19%, list=15%, signal=16%	192213/310683/305078/83785/78971/295378/689069/170921/296078/25353/315981/309368/29220/679845/25724/362973/366957/297173/25156/24628/315979/311862/25272/29169/363265/25023/366508/25304/24681/360468/305104/81008/116669/25267/688319/114110/24516	Rasgrf1/Itga10/Lamb3/Vegfa/Birc3/Vav3/Parvg/Itga2/Pak6/Spp1/Col6a4/Lama2/Thbs4/Shc4/Itgb4/Parvb/Rac2/RSA-14-44/Vav1/Pdgfb/Col6a6/Lamc3/Mapk10/Vtn/Col4a3/Prkcb/Pik3cd/Comp/Prkcg/Emp2/Col9a1/Itga7/Vwf/Pdgfra/Rac3/Flt4/Jun
rno04218	Cellular senescence	158	0.30805	1.00922	0.486884	0.645314	0.410821	4183	tags=25%, list=24%, signal=19%	414789/414791/24493/24498/414819/414779/294228/309603/29716/29513/294515/66026/314856/360323/24747/25679/298765/366508/24617/365527/311658/317389/406194/361857/24484/113894/83529/363924/114851/25112/25631/24356/25164/295052/25482/361400/170851/24842/116636/54355	RT1-CE15/RT1-CE11/Il1a/Il6/RT1-CE16/RT1-CE2/RT1-S3/RT1-CE1/Cacna1d/Mapk13/Foxo3/Trpv4/Mdm2/RT1-N2/RT1-M3-1/Itpr3/Zfp36l2/Pik3cd/Serpine1/RT1-M6-2/Nfatc2/Ccnb3/RT1-T18/Traf3ip2/Igfbp3/Sqstm1/Vdac1/Rad9b/Cdkn1a/Gadd45a/Smad3/Ets1/Cdkn2b/Ccna1/Mras/Nfatc3/Map2k1/Tp53/Eif4ebp1/Rassf5
rno04918	Thyroid hormone synthesis	68	0.332177	0.99522	0.489362	0.645526	0.410956	3973	tags=28%, list=23%, signal=22%	81819/24210/314638/25653/24214/29326/116700/29241/25023/25679/24681/29639/64532/29403/84396/499879/79107/116686/29216	Pax8/Asgr1/Creb3l3/Tshb/Atp1b2/Gpx2/Cga/Adcy8/Prkcb/Itpr3/Prkcg/Fxyd2/Adcy5/Asgr2/Atp1b4/Duoxa2/Duox2/Gsr/Lrp2
rno00061	Fatty acid biosynthesis	18	-0.339642	-0.970259	0.490909	0.645526	0.410956	1930	tags=33%, list=11%, signal=30%	114024/60581/29470/301120/50671/316124	Acsl3/Acaca/Mecr/Acsbg2/Fasn/Acsbg3
rno05208	Chemical carcinogenesis - reactive oxygen species	211	0.302857	1.00898	0.495859	0.649478	0.413472	2230	tags=12%, list=13%, signal=10%	100362331/24296/361267/24451/304784/84683/24421/25493/83785/25426/29513/24314/294515/24787/114243/24248/364018/25272/29487/501110/300850/498340/366508/25260/365057	Ndufa4l2/Cyp1a1/Akr1c15/Hmox1/Slc26a9/Cox4i2/Gsta1/Nfkbia/Vegfa/Cyp1b1/Mapk13/Nqo1/Foxo3/Sod2/Nox1/Cat/Ncf2/Mapk10/Gstt2/Gsta6/Gsta4/Mgst3l1/Pik3cd/Gstt1/Map3k5
rno04350	TGF-beta signaling pathway	110	0.310926	0.989563	0.498357	0.6502	0.413931	3871	tags=27%, list=22%, signal=21%	24835/252835/25587/294503/315728/83711/679119/288562/293135/29139/297173/64549/29381/316742/25366/25196/81516/25644/498299/313529/85272/289316/64507/29530/29199/303875/25631/25261/25164/24790	Tnf/Gdf5/Id2/Nodal/Thsd4/Inhbe/Bmp8b/Tfr2/Lrrc32/Dcn/RSA-14-44/Inhbc/Acvr1b/Tgif1/Acvr2b/Inhbb/Smad7/Bmp6/Lefty1/Tmem53/Bmp7/Lefty2/Fmod/Amhr2/Hfe/Nrros/Smad3/Id1/Cdkn2b/Sp1
rno04935	Growth hormone synthesis, secretion and action	109	0.310377	0.987389	0.501096	0.65123	0.414587	3997	tags=26%, list=23%, signal=20%	54305/29446/116667/679845/29716/29513/89829/314638/25321/114493/25272/29241/25023/25679/366508/24681/29337/24514/84607/64532/171044/24484/314612/114858/314322/24918/84021/170851	Sstr2/Ghrh/Map3k1/Shc4/Cacna1d/Mapk13/Socs3/Creb3l3/Ghrhr/Cacna1f/Mapk10/Adcy8/Prkcb/Itpr3/Pik3cd/Prkcg/Plcg2/Jak2/Socs2/Adcy5/Sstr3/Igfbp3/Shc2/Shc3/Fos/Stat5a/Irs3/Map2k1
rno04142	Lysosome	119	0.309246	0.990093	0.504348	0.652915	0.41566	6281	tags=43%, list=36%, signal=28%	25732/316519/60575/294673/361063/83615/363513/315676/29757/684529/65161/100362547/25425/361704/266732/363494/315165/171293/315047/367562/24375/79248/50654/171575/25715/24944/299825/360658/25524/117106/293455/310864/63865/361378/361939/307901/311404/83534/316033/29186/25151/293676/286898/290923/84431/24591/29411/83800/25697/252929/360630	Acp5/Slc11a1/Napsa/Hexb/Entpd4/Atp6ap1/Ids/Dmxl2/Atp6v0a1/Ctso/Litaf/Ap1g2/Ctsh/Ctsf/Npc1/Gla/Naga/Ctsd/Laptm4b/Gaa/Fuca1/Abca2/Ctss/Dnase2/Slc11a2/Lamp2/Gns/Gga3/Psap/Scarb2/Gga2/Manba/Lgmn/Man2b1/Mfsd8/Meak7/Ap4e1/Tpp1/Glb1/Cd63/Igf2r/Ctsw/Npc2/Aga/Asah1/Neu1/Ppt1/Clta/Ctsl/Ctsz/Naglu
rno04914	Progesterone-mediated oocyte maturation	83	-0.239974	-0.972225	0.507937	0.65462	0.416745	4665	tags=37%, list=27%, signal=27%	307511/64363/311412/314642/84420/501560/362817/287101/171102/302950/288671/293502/85243/360643/117269/689314/363088/54237/296137/192209/24482/261730/297176/25154/25203/24185/680006/114494/25515/317203/60664	Cdc25c/Araf/Anapc1/Fzr1/Adcy7/Rps6ka3/Cdk2/Pkmyt1/Cdc25a/Adcy9/Anapc5/Kif22/Pik3cb/Cdc27/Rps6ka2/Mapk11/Ccnb2/Cdk1/Bub1/Spdya/Igf1/Aurka/Mad2l1/Pgr/Ccnb1/Akt1/Mad1l1/Ccna2/Plk1/Rps6ka6/Pik3r3
rno04611	Platelet activation	117	0.309285	0.987587	0.511475	0.65462	0.416745	2639	tags=21%, list=15%, signal=18%	25155/498276/24600/502858/170921/29251/29513/691905/297173/691907/24693/292661/298947/303634/307171/691992/29241/25679/366508/25523/29337/311341/116669/64532/309186	Syk/Fcgr2al1/Nos3/Gp9/Itga2/F2/Mapk13/Pla2g4d/RSA-14-44/Pla2g4f/Ptgs1/Ptgir/Pik3cg/Gna13/Apbb1ip/Gp1ba/Adcy8/Itpr3/Pik3cd/Prkg2/Plcg2/Pla2g4b/Vwf/Adcy5/Fermt3
rno00785	Lipoic acid metabolism	18	-0.334344	-0.955123	0.512727	0.65462	0.416745	4532	tags=56%, list=26%, signal=41%	361272/298942/171133/365314/299201/360975/29711/81654/289950/29611	Dhtkd1/Dld/Gcsh/Lipt2/Dlst/Ogdh/Bckdhb/Dlat/Pdhb/Dbt
rno00534	Glycosaminoglycan biosynthesis - heparan sulfate / heparin	24	-0.311484	-0.950187	0.513944	0.65462	0.416745	4274	tags=46%, list=25%, signal=35%	364675/310803/56819/362035/292155/298690/302489/29633/299907/364476/294449	B4galt7/Extl2/Extl3/Ndst4/Hs2st1/B3galt6/Hs6st2/Ndst1/Ext1/Hs6st3/Hs3st5
rno00450	Selenocompound metabolism	16	-0.354179	-0.962518	0.515464	0.65462	0.416745	3716	tags=44%, list=21%, signal=34%	541589/299851/81522/363285/291314/308993/24962	Kyat3/Mars1/Mtr/Scly/Sephs1/Sephs2/Cth
rno04927	Cortisol synthesis and secretion	58	0.336619	0.983038	0.518697	0.656231	0.41777	2081	tags=17%, list=12%, signal=15%	114862/25469/56827/83826/29716/314638/114493/29241/25679/29717	Cacna1h/Kcna4/Cacna1i/Nr5a1/Cacna1d/Creb3l3/Cacna1f/Adcy8/Itpr3/Cacna1g
rno00600	Sphingolipid metabolism	52	0.338162	0.972735	0.52237	0.658383	0.419141	2960	tags=19%, list=17%, signal=16%	499174/313339/314438/246115/316642/294673/290658/83626/50555/289322	Cers3/Acer2/Degs2/Plpp2/Neu4/Hexb/Cers1/Ugcg/Ugt8/Degs1l2
rno00563	Glycosylphosphatidylinositol (GPI)-anchor biosynthesis	27	-0.303044	-0.952614	0.534413	0.669779	0.426396	5660	tags=59%, list=33%, signal=40%	309051/192263/353304/303277/361344/79112/313341/295543/364032/688174/315807/362756/378774/287159/362518/300046	Pign/Pigl/Pigu/Pigs/Mppe1/Pigm/Pigo/Pigk/Pigc/Pgap3/Pigb/Pigh/Pigw/Pigq/Pgap4/Gpaa1
rno04614	Renin-angiotensin system	20	0.387923	0.942114	0.535422	0.669779	0.426396	907	tags=15%, list=5%, signal=14%	64017/81641/302668	Enpep/Anpep/Ace2
rno00270	Cysteine and methionine metabolism	49	-0.26491	-0.968999	0.538043	0.670547	0.426884	4434	tags=37%, list=26%, signal=27%	64203/444985/81640/29443/24551/81522/313790/288912/24250/293820/306540/84350/81829/25134/58835/84596/24962/25331	Bcat2/Dnmt3b/Amd1/Ahcy/Mdh1/Mtr/Lacc1/Mri1/Cbs/Psat1/Got1l1/Dnmt1/Mdh2/Gnmt/Phgdh/Srm/Cth/Mat1a
rno04962	Vasopressin-regulated water reabsorption	40	0.348213	0.953099	0.544174	0.673784	0.428945	1484	tags=8%, list=9%, signal=7%	362456/65133/314638	Arhgdib/Aqp3/Creb3l3
rno04340	Hedgehog signaling pathway	47	0.334006	0.948022	0.544676	0.673784	0.428945	4440	tags=19%, list=26%, signal=14%	301073/84380/25387/140589/64086/89830/29216/84392/25388	Hhatl/Dhh/Arrb1/Gli1/Csnk1g1/Ptch1/Lrp2/Kif3a/Arrb2
rno05223	Non-small cell lung cancer	70	0.319641	0.959979	0.549112	0.676766	0.430844	4789	tags=30%, list=28%, signal=22%	24716/83574/681314/294515/24827/25023/366508/24681/29337/100362121/114851/25112/24918/170851/363140/24842/54355/25738/684111/314906/24708	Ret/Rxrg/Bax-ps2/Foxo3/Tgfa/Prkcb/Pik3cd/Prkcg/Plcg2/Ddb2/Cdkn1a/Gadd45a/Stat5a/Map2k1/Rassf1/Tp53/Rassf5/Plcg1/E2f2/Kif5a/Rb1
rno00512	Mucin type O-glycan biosynthesis	29	0.362147	0.940985	0.563565	0.691575	0.440272	1982	tags=21%, list=11%, signal=18%	290638/292325/100361647/100360475/366061/287920	B3gnt3/B3gnt6/Galnt6/Galnt15/Galnt3/St6galnac1
rno04330	Notch signaling pathway	60	0.325817	0.956249	0.565269	0.691575	0.440272	2115	tags=13%, list=12%, signal=12%	687424/300802/29147/406162/679028/79225/84010/81751	Dtx1/Aph1b/Jag2/Notch4/Rbpj/Hes5/Dll1/Psen2
rno00630	Glyoxylate and dicarboxylate metabolism	28	-0.286346	-0.908616	0.585062	0.713178	0.454024	4340	tags=43%, list=25%, signal=32%	170587/298942/171133/24551/79250/687008/50655/500536/81829/365096/308100/287379	Cs/Dld/Gcsh/Mdh1/Aco2/Pcca/Aco1/Hyi/Mdh2/Acat2l1/Acat2/Shmt1
rno01232	Nucleotide metabolism	76	0.306537	0.932898	0.603009	0.732382	0.46625	3281	tags=20%, list=19%, signal=16%	684425/29223/289801/362638/25095/24183/83585/361063/298881/100360582/497811/311833/619580/58813/54410	Adss1/Ak4/Upp1/Cda/Ampd3/Ak1/Gda/Entpd4/Nt5c1b/Nt5c/Xdh/Ak8/Ctps2/Nt5e/Enpp3
rno04215	Apoptosis - multiple species	33	0.337992	0.899208	0.617571	0.74735	0.475779	1863	tags=18%, list=11%, signal=16%	24596/78971/64625/681314/317673/25272	Ngfr/Birc3/Bid/Bax-ps2/Bbc3/Mapk10
rno00430	Taurine and hypotaurine metabolism	15	0.391146	0.889433	0.624818	0.75339	0.479624	3433	tags=40%, list=20%, signal=32%	25256/246245/29725/24379/408206/246247	Fmo1/Fmo2/Baat/Gad1/Ggt6/Fmo4
rno05217	Basal cell carcinoma	55	0.310008	0.901174	0.634058	0.761782	0.484967	2331	tags=18%, list=13%, signal=16%	315294/84426/24881/316526/681314/140584/161452/282582/140589/100362121	Wnt10b/Wnt4/Wnt1/Wnt6/Bax-ps2/Wnt11/Lef1/Wnt5b/Gli1/Ddb2
rno04130	SNARE interactions in vesicular transport	33	-0.267726	-0.879444	0.640351	0.766585	0.488024	2257	tags=21%, list=13%, signal=18%	83730/362283/360953/64351/116500/64154/102557303	Vamp8/Stx16/Stx18/Ykt6/Snap29/Gosr2/Vamp9
rno04152	AMPK signaling pathway	117	0.289315	0.923821	0.644809	0.769165	0.489667	2106	tags=15%, list=12%, signal=14%	83516/117256/60416/291541/690987/499358/25741/64562/117276/294515/116719/24536/29412/25520/314638/25139/360827/366508	Ppargc1a/Ppp2r2c/Pfkp/Cidea/Gys1/Scd4/Pfkl/Prkab2/Pfkfb3/Foxo3/Acacb/Lepr/Adra1a/Prkag1/Creb3l3/Slc2a4/Ulk1/Pik3cd
rno05412	Arrhythmogenic right ventricular cardiomyopathy	80	0.295934	0.90733	0.649485	0.771985	0.491462	3567	tags=31%, list=21%, signal=25%	306871/310683/291760/64362/303468/170921/309368/140729/25724/29716/140725/114493/161452/81679/81008/680229/58942/140726/364605/29302/300992/24392/362800/685269/171009	Dsp/Itga10/Dsc2/Des/Sgca/Itga2/Lama2/Cacng8/Itgb4/Cacna1d/Cacng4/Cacna1f/Lef1/Jup/Itga7/Sgcb/Cacnb4/Cacng5/Sgcz/Itgb3/Cacna2d2/Gja1/Itgb8/Itga2b/Actn3
rno04730	Long-term depression	57	0.307361	0.896111	0.6538	0.774359	0.492973	2615	tags=25%, list=15%, signal=21%	25740/24414/114207/691905/691907/50664/303634/25023/25679/50592/25523/24681/311341/25398	Gnaz/Grm1/Ryr1/Pla2g4d/Pla2g4f/Gnao1/Gna13/Prkcb/Itpr3/Gria1/Prkg2/Prkcg/Pla2g4b/Cacna1a
rno04310	Wnt signaling pathway	158	0.280387	0.918593	0.668416	0.788872	0.502213	2631	tags=17%, list=15%, signal=15%	80722/315294/25445/362770/295691/84426/24881/310552/316526/303412/366957/140584/297173/500863/25272/161452/309377/293649/25023/282582/24681/499949/311658/503000/688319/24516/312563	Sost/Wnt10b/Fosl1/Ccdc88c/Frzb/Wnt4/Wnt1/Sfrp2/Wnt6/Rnf43/Rac2/Wnt11/RSA-14-44/Rspo2/Mapk10/Lef1/Sfrp5/Lrp5/Prkcb/Wnt5b/Prkcg/Apcdd1l/Nfatc2/Ctnnbip1/Rac3/Jun/Prickle2
rno01240	Biosynthesis of cofactors	133	0.283888	0.917447	0.671674	0.789837	0.502828	3315	tags=20%, list=19%, signal=16%	29244/684425/29223/293504/363118/292875/365699/297805/24314/24183/65156/83472/361472/681319/114106/727679/289827/25283/64845/311833/64621/286964/83578/619580/688283/59113	Gch1/Adss1/Ak4/Qprt/Nmnat3/Aspdh/Nadk2/Sdr16c5/Nqo1/Ak1/Dhodh/Ugdh/Mthfd1l/Ido2/Bco1/Pdxp/Ugp2/Gclc/Gphn/Ak8/Akp3/Hsd17b6/Pdxk/Ctps2/Afmid/Kmo
rno03018	RNA degradation	77	0.290504	0.885823	0.673963	0.789837	0.502828	1381	tags=9%, list=8%, signal=8%	24334/60416/29619/25741/29618/24333/292295	Eno2/Pfkp/Btg2/Pfkl/Btg1/Eno1/Pabpc6
rno00730	Thiamine metabolism	17	0.362654	0.850179	0.680055	0.792742	0.504676	2697	tags=24%, list=16%, signal=20%	29223/24183/311833/64621	Ak4/Ak1/Ak8/Akp3
rno00053	Ascorbate and aldarate metabolism	16	0.363547	0.842664	0.683544	0.792742	0.504676	1929	tags=19%, list=11%, signal=17%	252899/83472/691018	Miox/Ugdh/Hsd17b14
rno04964	Proximal tubule bicarbonate reclamation	21	0.342949	0.837249	0.683562	0.792742	0.504676	3527	tags=33%, list=20%, signal=27%	29242/24784/24214/29639/252919/84396/192268	Car4/Slc9a3/Atp1b2/Fxyd2/Slc38a3/Atp1b4/Gls2
rno00532	Glycosaminoglycan biosynthesis - chondroitin sulfate / dermatan sulfate	21	-0.27794	-0.835242	0.691176	0.798799	0.508533	4427	tags=38%, list=26%, signal=28%	296733/364675/306375/365583/691394/298690/291577/361450	Chpf2/B4galt7/Csgalnact1/Dse/Chst14/B3galt6/Chsy3/Ust
rno05210	Colorectal cancer	86	0.286067	0.886968	0.6958	0.80137	0.510169	4064	tags=26%, list=23%, signal=20%	59325/681314/366957/297173/317673/24827/25272/116546/161452/366508/100362121/688319/24516/64547/25310/114851/25112/25631/314322/170851/24842/29183	Ereg/Bax-ps2/Rac2/RSA-14-44/Bbc3/Tgfa/Mapk10/Ralb/Lef1/Pik3cd/Ddb2/Rac3/Jun/Bcl2l11/Cyct/Cdkn1a/Gadd45a/Smad3/Fos/Map2k1/Tp53/Areg
rno00511	Other glycan degradation	17	0.354377	0.830776	0.700831	0.80439	0.512092	6148	tags=53%, list=35%, signal=34%	316642/294673/24375/310864/361378/316033/290923/24591/303702	Neu4/Hexb/Fuca1/Manba/Man2b1/Glb1/Aga/Neu1/Engase
rno04960	Aldosterone-regulated sodium reabsorption	32	-0.259412	-0.857315	0.707424	0.809176	0.515139	3756	tags=38%, list=22%, signal=29%	24767/24211/24521/85243/25650/29132/24482/25467/29517/25117/116501/60664	Scnn1b/Atp1a1/Kcnj1/Pik3cb/Atp1b1/Atp1a4/Igf1/Irs1/Sgk1/Hsd11b2/Nherf2/Pik3r3
rno04924	Renin secretion	64	0.287433	0.853752	0.721429	0.822379	0.523544	2136	tags=17%, list=12%, signal=15%	24167/308016/24925/25645/83731/29716/29290/24603/114493/25679/25523	Adcyap1r1/Clca2/Adrb1/Adrb3/Kcnma1/Cacna1d/Adora1/Npr1/Cacna1f/Itpr3/Prkg2
rno04150	mTOR signaling pathway	142	0.273371	0.890229	0.72572	0.824458	0.524868	2263	tags=13%, list=13%, signal=12%	293561/24835/297960/315294/140942/84426/24881/316526/140584/297173/313977/312488/360827/293649/25023/282582/366508/24681/362171	Rnf152/Tnf/Rragd/Wnt10b/Ddit4/Wnt4/Wnt1/Wnt6/Wnt11/RSA-14-44/Lpin1/Atp6v1b1/Ulk1/Lrp5/Prkcb/Wnt5b/Pik3cd/Prkcg/Prr5l
rno00541	Biosynthesis of various nucleotide sugars	19	0.33501	0.802231	0.732143	0.828935	0.527718	2297	tags=16%, list=13%, signal=14%	361245/83472/289827	Cmah/Ugdh/Ugp2
rno05014	Amyotrophic lateral sclerosis	341	0.267227	0.910129	0.743952	0.839459	0.534418	2120	tags=10%, list=12%, signal=9%	24599/100362331/24835/24587/500377/24411/84683/500442/24408/24409/29430/29482/25166/500319/500363/64625/24688/681314/360654/156767/29513/117250/679312/361824/432361/246294/29326/29467/24248/360827/316226/25679/207117/50592	Nos2/Ndufa4l2/Tnf/Nefh/Tuba8/Grin2c/Cox4i2/Dnai1/Grin1/Grin2a/Hap1/Slc1a2/Casp1/Tuba3a/Tuba3b/Bid/Prph/Bax-ps2/Dnai2/Tnfrsf1b/Mapk13/Dnah6/Tubb1/Chchd10/Nrg2/Optn/Gpx2/Ddit3/Cat/Ulk1/Klc4/Itpr3/Dnah8/Gria1
rno00230	Purine metabolism	123	0.269251	0.864682	0.757576	0.851954	0.542372	3336	tags=22%, list=19%, signal=18%	684425/29223/25711/290646/25095/113911/24645/314140/24603/308758/24183/83585/361063/298881/140929/29241/100360582/81743/497811/64532/311833/245708/293613/297998/58813/54410/63885	Adss1/Ak4/Gucy2c/Pde4c/Ampd3/Gucy2e/Pgm1/Prps1l3/Npr1/Hddc3/Ak1/Gda/Entpd4/Nt5c1b/Pde7b/Adcy8/Nt5c/Pde2a/Xdh/Adcy5/Ak8/Gucy2g/Urah/Nudt2/Nt5e/Enpp3/Pde10a
rno05225	Hepatocellular carcinoma	160	0.261462	0.857677	0.778594	0.870154	0.553959	3498	tags=21%, list=20%, signal=17%	24451/315294/24421/84426/24881/316526/679845/681314/24314/140584/24827/29487/501110/300850/498340/161452/293649/25023/282582/366508/25260/24681/29337/24426/100362121/295037/288563/114851/171341/314612/58819/114858/25112/25631	Hmox1/Wnt10b/Gsta1/Wnt4/Wnt1/Wnt6/Shc4/Bax-ps2/Nqo1/Wnt11/Tgfa/Gstt2/Gsta6/Gsta4/Mgst3l1/Lef1/Lrp5/Prkcb/Wnt5b/Pik3cd/Gstt1/Prkcg/Plcg2/Gstp1/Ddb2/Mgst2/Actl6b/Cdkn1a/Mgst1/Shc2/Txnrd1/Shc3/Gadd45a/Smad3
rno04072	Phospholipase D signaling pathway	138	0.264051	0.856205	0.77897	0.870154	0.553959	4507	tags=31%, list=26%, signal=23%	25155/24414/500906/29251/679845/59326/691905/246115/297173/60590/691907/24628/298947/303634/116546/29241/366508/140694/29337/311341/25267/170919/64532/24417/367745/24418/81672/60427/314612/114858/140866/24180/170897/309419/25482/170851/116691/498609/25738/361076/24653/85385/361568	Syk/Grm1/Cyth4/F2/Shc4/Rapgef3/Pla2g4d/Plpp2/RSA-14-44/Grm8/Pla2g4f/Pdgfb/Pik3cg/Gna13/Ralb/Adcy8/Pik3cd/Dnm1/Plcg2/Pla2g4b/Pdgfra/Agpat4/Adcy5/Grm4/Dgkk/Grm5/Grm7/Kitlg/Shc2/Shc3/Dgka/Agtr1a/Sphk1/Pip5k1b/Mras/Map2k1/Cyth1/Lpar2/Plcg1/Dgkh/Pla2g4a/Shc1/Rras
rno03272	Virion - Hepatitis viruses	41	0.286363	0.788145	0.794677	0.88474	0.563245	3986	tags=32%, list=23%, signal=24%	65129/171577/680489/287098/25253/155268/304125/83497/313641/24936/304388/500000/24777	Cldn1/Epcam/Cldn34e/Cldn6/Dpp4/Cldn16/Cldn17/Ocln/Hspg2/Cd9/Cldn15/Cldn12/Slc10a1
rno04211	Longevity regulating pathway	85	0.262506	0.810719	0.799544	0.887202	0.564812	2594	tags=16%, list=15%, signal=14%	83516/681314/64562/294515/25520/314638/24787/25050/24248/360827/29241/366508/64532/83506	Ppargc1a/Bax-ps2/Prkab2/Foxo3/Prkag1/Creb3l3/Sod2/Camk4/Cat/Ulk1/Adcy8/Pik3cd/Adcy5/Camkk2
rno04919	Thyroid hormone signaling pathway	118	0.261084	0.834698	0.813319	0.899498	0.57264	2392	tags=14%, list=14%, signal=12%	24778/60416/406162/84426/83574/25741/140666/314856/24214/25023/366508/24681/497197/29639/29337/259248	Slc2a1/Pfkp/Notch4/Wnt4/Rxrg/Pfkl/Rcan2/Mdm2/Atp1b2/Prkcb/Pik3cd/Prkcg/Plcz1/Fxyd2/Plcg2/Slc16a2
rno04012	ErbB signaling pathway	83	0.256176	0.788712	0.823059	0.907267	0.577586	4425	tags=27%, list=26%, signal=20%	59325/296078/679845/83571/24827/432361/25272/25023/366508/24681/29337/24516/114851/25433/314612/114858/24918/170851/29183/116636/25738/85385	Ereg/Pak6/Shc4/Cdkn1b/Tgfa/Nrg2/Mapk10/Prkcb/Pik3cd/Prkcg/Plcg2/Jun/Cdkn1a/Hbegf/Shc2/Shc3/Stat5a/Map2k1/Areg/Eif4ebp1/Plcg1/Shc1
rno04530	Tight junction	151	0.251576	0.821862	0.832455	0.914605	0.582257	2731	tags=17%, list=16%, signal=14%	65129/500377/500464/117256/500319/500363/116667/29716/288515/64562/366733/25520/297173/619374/362279/315795/25272/680489/287098/365057/54319/293057/24516/155268/304125	Cldn1/Tuba8/Epb41l4b/Ppp2r2c/Tuba3a/Tuba3b/Map3k1/Cacna1d/Micall2/Prkab2/Diras3/Prkag1/RSA-14-44/Jam2/Pard6b/Cgnl1/Mapk10/Cldn34e/Cldn6/Map3k5/Ezr/Whamm/Jun/Cldn16/Cldn17
rno05415	Diabetic cardiomyopathy	195	0.24839	0.824697	0.843361	0.923549	0.587951	2214	tags=9%, list=13%, signal=8%	81687/100362331/84683/24778/24600/500904/690987/24383/29513/366957/66021/25139/364018/25272/25023/366508/24681/89813	Mmp9/Ndufa4l2/Cox4i2/Slc2a1/Nos3/Ncf4/Gys1/Gapdh/Mapk13/Rac2/Cybb/Slc2a4/Ncf2/Mapk10/Prkcb/Pik3cd/Prkcg/Pdk4
rno04916	Melanogenesis	88	0.24544	0.764333	0.856982	0.935399	0.595495	2150	tags=14%, list=12%, signal=12%	315294/84426/24881/316526/140584/314638/50664/161452/29241/25023/282582/24681	Wnt10b/Wnt4/Wnt1/Wnt6/Wnt11/Creb3l3/Gnao1/Lef1/Adcy8/Prkcb/Wnt5b/Prkcg
rno04810	Regulation of actin cytoskeleton	210	0.246004	0.8192	0.864389	0.938366	0.597384	2385	tags=14%, list=14%, signal=12%	60663/298975/24559/60628/81509/25245/310683/29368/295378/170921/296078/362119/25021/170583/29251/25724/298890/309684/366957/297173/25156/24628/117542/303634/366508/100360623/81008/54319/25444/25267	Insrr/Scin/Mos/Cxcr4/Bdkrb1/Bdkrb2/Itga10/Fgf17/Vav3/Itga2/Pak6/C5/Itgam/Fgf23/F2/Itgb4/Cyria/Itgb2/Rac2/RSA-14-44/Vav1/Pdgfb/Baiap2/Gna13/Pik3cd/Iqgap2/Itga7/Ezr/Fgf9/Pdgfra
rno04070	Phosphatidylinositol signaling system	92	0.247153	0.771277	0.86532	0.938366	0.597384	4680	tags=28%, list=27%, signal=21%	500709/171458/306490/81677/54259/25023/25679/366508/24681/497197/81925/114101/29337/367745/116720/312634/83523/140866/309419/24655/25738/361076/64161/282636/89812/81678	Itpk1/Ipmk/Mtmr7/Itpka/Inpp5d/Prkcb/Itpr3/Pik3cd/Prkcg/Plcz1/Cds1/Cds2/Plcg2/Dgkk/Pik3c2g/Mtmr14/Impa1/Dgka/Pip5k1b/Plcd1/Plcg1/Dgkh/Pi4ka/Impa2/Pip4k2b/Itpr2
rno05221	Acute myeloid leukemia	62	0.253409	0.748075	0.871703	0.942229	0.599843	4159	tags=27%, list=24%, signal=21%	116630/25021/140635/317366/161452/366508/81679/307403/116663/170929/24705/60350/24918/295052/25682/170851/116636	Csf2/Itgam/Flt3/Pim2/Lef1/Pik3cd/Jup/Csf1r/Dusp6/Bcl2a1/Rara/Cd14/Stat5a/Ccna1/Ppard/Map2k1/Eif4ebp1
rno05226	Gastric cancer	134	0.242088	0.782483	0.884822	0.950784	0.60529	2331	tags=16%, list=13%, signal=14%	315294/29368/84426/24881/24572/83574/170913/24646/316526/170583/679845/681314/83571/140584/161452/293649/282582/366508/81679/25444/100362121	Wnt10b/Fgf17/Wnt4/Wnt1/Muc2/Rxrg/Abcb1a/Abcb1b/Wnt6/Fgf23/Shc4/Bax-ps2/Cdkn1b/Wnt11/Lef1/Lrp5/Wnt5b/Pik3cd/Jup/Fgf9/Ddb2
rno00514	Other types of O-glycan biosynthesis	39	-0.227192	-0.789188	0.887387	0.950784	0.60529	4067	tags=36%, list=23%, signal=28%	84430/60433/25197/311039/494219/499968/362760/288611/29750/313536/83627/79214/288091/313878	Pomt1/Rfng/St6gal1/Galnt13/Eogt/Galntl5/Galnt16/Galnt17/Galnt7/B4galt2/Galnt5/Galnt1/Poglut1/Galnt14
rno05218	Melanoma	66	-0.208395	-0.807453	0.888158	0.950784	0.60529	1562	tags=14%, list=9%, signal=12%	367858/79429/24329/24185/29349/24553/29369/60664/60464	Hrasl1/Pdgfc/Egfr/Akt1/Fgf8/Met/Fgf18/Pik3r3/Fgf16
rno05016	Huntington disease	289	0.238902	0.806659	0.898374	0.957738	0.609716	2230	tags=9%, list=13%, signal=8%	100362331/500377/56083/84683/500442/24408/83516/29430/29482/500319/500363/681314/360654/257648/117250/317673/314638/679312/24860/24787/29326/25272/360827/316226/207117/50592/365057	Ndufa4l2/Tuba8/Tgm2/Cox4i2/Dnai1/Grin1/Ppargc1a/Hap1/Slc1a2/Tuba3a/Tuba3b/Bax-ps2/Dnai2/Cacna1b/Dnah6/Bbc3/Creb3l3/Tubb1/Ucp1/Sod2/Gpx2/Mapk10/Ulk1/Klc4/Dnah8/Gria1/Map3k5
rno04136	Autophagy - other	31	0.253747	0.668617	0.900388	0.957738	0.609716	1647	tags=6%, list=9%, signal=6%	499973/689161	Atg9b/Gabarapl1
rno00100	Steroid biosynthesis	20	0.273552	0.664351	0.910082	0.964976	0.614324	2320	tags=20%, list=13%, signal=17%	25279/361631/81782/114700	Cyp24a1/Cyp2r1/Soat1/Cyp27b1
rno05220	Chronic myeloid leukemia	76	0.236251	0.718993	0.915509	0.967659	0.616032	4789	tags=26%, list=28%, signal=19%	25493/679845/681314/83571/314856/366508/100362121/114851/314612/114858/25112/25631/24918/170851/24842/85385/309696/84351/684111/24708	Nfkbia/Shc4/Bax-ps2/Cdkn1b/Mdm2/Pik3cd/Ddb2/Cdkn1a/Shc2/Shc3/Gadd45a/Smad3/Stat5a/Map2k1/Tp53/Shc1/Bcr/Ikbkb/E2f2/Rb1
rno05100	Bacterial invasion of epithelial cells	75	-0.203833	-0.806892	0.928058	0.974072	0.620115	3895	tags=25%, list=22%, signal=20%	25404/24511/291962/83788/25614/85243/305227/170922/116561/287876/361251/29161/294568/305679/361839/81822/297357/24553/60664	Cav1/Itgb1/Elmo3/Septin9/Ptk2/Pik3cb/Septin11/Ilk/Cltb/Actg1/Elmo1/Cav3/Wasf1/Vcl/Ctnna3/Actb/Ctnna2/Met/Pik3r3
rno05212	Pancreatic cancer	74	0.227431	0.688352	0.931075	0.974072	0.620115	5396	tags=28%, list=31%, signal=20%	83785/681314/366957/24827/25272/116546/366508/100362121/688319/114851/25112/25631/170851/24842/84351/684111/24708/309165/25313/81736/25125	Vegfa/Bax-ps2/Rac2/Tgfa/Mapk10/Ralb/Pik3cd/Ddb2/Rac3/Cdkn1a/Gadd45a/Smad3/Map2k1/Tp53/Ikbkb/E2f2/Rb1/Rela/Egf/Nfkb1/Stat3
rno04261	Adrenergic signaling in cardiomyocytes	140	0.226388	0.735605	0.93262	0.974072	0.620115	3021	tags=18%, list=17%, signal=15%	24585/24925/117256/64155/140729/29716/29513/59326/29412/314638/140725/24214/29686/298947/114493/315611/29241/360718/29639/64532/29275/58942/140726/682033/84396	Myl3/Adrb1/Ppp2r2c/Scn7a/Cacng8/Cacna1d/Mapk13/Rapgef3/Adra1a/Creb3l3/Cacng4/Atp1b2/Scn1b/Pik3cg/Cacna1f/Scn4b/Adcy8/Popdc2/Fxyd2/Adcy5/Actc1/Cacnb4/Cacng5/Ppp2r3b/Atp1b4
rno04966	Collecting duct acid secretion	22	0.256025	0.628026	0.933243	0.974072	0.620115	4910	tags=36%, list=28%, signal=26%	312488/24779/29757/368044/308069/117596/299159/299971	Atp6v1b1/Slc4a1/Atp6v0a1/Atp6v1g2/Slc12a7/Atp6v1b2/Atp6v1d/Atp6v1c1
rno04961	Endocrine and other factor-regulated calcium reabsorption	47	0.230692	0.654783	0.947368	0.984311	0.626634	2229	tags=15%, list=13%, signal=13%	25245/83839/24214/25023/24681/140694/29639	Bdkrb2/Calb1/Atp1b2/Prkcb/Prkcg/Dnm1/Fxyd2
rno03250	Viral life cycle - HIV-1	57	0.229387	0.66878	0.950543	0.984311	0.626634	1372	tags=5%, list=8%, signal=5%	60628/306347/286918	Cxcr4/Ell/Mx2
rno05012	Parkinson disease	246	0.22078	0.741176	0.951894	0.984311	0.626634	2230	tags=8%, list=13%, signal=7%	100362331/29477/500377/84683/25369/24316/500319/500363/300051/681314/25085/679312/306009/295704/29467/25272/316226/25679/29219/365057	Ndufa4l2/Mapt/Tuba8/Cox4i2/Adora2a/Drd1/Tuba3a/Tuba3b/Slc39a4/Bax-ps2/Th/Tubb1/Slc39a14/Ube2l6/Ddit3/Mapk10/Klc4/Itpr3/Snca/Map3k5
rno04115	p53 signaling pathway	70	0.220438	0.662042	0.956213	0.985726	0.627534	3766	tags=23%, list=22%, signal=18%	29157/64625/681314/170824/314856/317673/686781/24617/100362121/25310/24484/114851/25112/83628/246097/64044	Ccng2/Bid/Bax-ps2/Steap3/Mdm2/Bbc3/Ppp1r13l/Serpine1/Ddb2/Cyct/Igfbp3/Cdkn1a/Gadd45a/Cd82/Fas/Casp8
rno04360	Axon guidance	176	0.212746	0.701593	0.962694	0.989354	0.629844	3684	tags=21%, list=21%, signal=17%	65047/60628/114523/84426/60629/296078/360546/360958/362993/246217/366957/297173/60589/362279/312213/60395/309280/84609/282582/366508/29337/641521/311658/688319/65208/312275/94268/85272/315564/311384/362873/58946/89830/29744/24772/361597/307989	Slit1/Cxcr4/Ntn1/Wnt4/Unc5a/Pak6/Efnb3/Ablim2/Rnd1/Ngef/Rac2/RSA-14-44/Epha8/Pard6b/Plxna4/Trpc3/Plxna3/Sema6b/Wnt5b/Pik3cd/Plcg2/Lrrc4/Nfatc2/Rac3/Dpysl5/Ephb6/Efna1/Bmp7/Robo3/Sema6d/Plxnc1/Robo1/Ptch1/Sema6c/Cxcl12/Fes/Ablim1
rno00310	Lysine degradation	63	-0.182723	-0.713106	0.976331	0.997215	0.634849	5636	tags=43%, list=32%, signal=29%	102550344/290637/689820/25014/291450/309001/171142/65183/306764/361272/100366024/296925/298942/364785/680537/689954/302553/299201/299521/297333/362078/312299/100359816/365096/294924/308100/303272	Kmt2b/Colgalt1/Kmt5a/Acat1/Aldh7a1/Setd1a/Ehhadh/Aldh3a2/Nsd1/Dhtkd1/Prdm16/Aass/Dld/Suv39h2/Nsd2/Setd7/Suv39h1/Dlst/Camkmt/Smyd1/Ehmt1/Ezh2/Setd1b/Acat2l1/Mecom/Acat2/Pipox
rno04140	Autophagy - animal	158	0.203597	0.667014	0.976915	0.997215	0.634849	4017	tags=16%, list=23%, signal=13%	297960/499973/84480/140942/306722/689161/246294/25272/360827/366508/170538/83506/308865/501854/113894/50522/312634/58845/299188/498013/100912032/171293/25482/84021/170851/360682	Rragd/Atg9b/Bnip3/Ddit4/Dapk1/Gabarapl1/Optn/Mapk10/Ulk1/Pik3cd/Prkcd/Camkk2/Atg16l2/Rab7b/Sqstm1/Ubc/Mtmr14/Igbp1/Zfyve1/Ern1/Rps27a/Ctsd/Mras/Irs3/Map2k1/Wdr45b
rno00640	Propanoate metabolism	31	0.212489	0.559905	0.979301	0.997215	0.634849	1711	tags=10%, list=10%, signal=9%	24533/116719/29634	Ldha/Acacb/Ldhc
rno05213	Endometrial cancer	58	-0.190397	-0.722388	0.982659	0.997593	0.635089	1562	tags=24%, list=9%, signal=22%	363595/81685/293621/64639/85243/58960/170922/24577/367858/24329/24185/361839/297357/60664	Tcf7/Mlh1/Hras/Bad/Pik3cb/Map2k2/Ilk/Myc/Hrasl1/Egfr/Akt1/Ctnna3/Ctnna2/Pik3r3
rno00280	Valine, leucine and isoleucine degradation	51	-0.180951	-0.668661	0.99435	1	0.636621	2609	tags=18%, list=15%, signal=15%	361884/29637/29611/63938/690163/365096/308100/65984/81632	Mccc2/Hmgcs1/Dbt/Hibadh/Oxct1/Acat2l1/Acat2/Aacs/Abat
rno04714	Thermogenesis	215	-0.174894	-0.79003	1	1	0.636621	4853	tags=34%, list=28%, signal=25%	297867/301123/26196/25757/685179/299954/362897/685596/192241/361894/293453/293652/94271/497902/287871/100366024/291660/84420/81728/296086/501560/29254/25282/288088/293655/289217/298400/293991/56769/302950/293621/94340/299739/295923/83840/65248/26194/171379/297990/301020/24602/301458/282546/117269/287876/689314/300047/361925/26198/29754/114024/26200/26192/26193/50545/26201/56718/367858/298377/2892…	Arid1a/Ndufa11/ATP8/Cpt1a/Smarcc2/Ndufb9/Uqcrb/Uqcrbl1/Atp5po/Ndufaf2/Ndufab1/Ndufs8/Atp5pf/Uqcrq/Rptor/Prdm16/Ndufa2/Adcy7/Ndufv2/Ndufaf1/Rps6ka3/Mgll/Cox6a1/Ndufb4/Ndufv1/Sdhc/Creb3/Ndufb8/Ndufaf3/Adcy9/Hras/Acsl5/Ndufa12/Ndufs3/Rps6kb1/Prkaa1/ND2/Smarca4/Ndufb6/Smarcc1/Nppa/Ndufs1/Arid1b/Rps6ka2/Actg1/Mapk11/Cyc1/Actl6a/COX2/Atp5mc1/Acsl3/ND4L/CYTB/ND1/Dpf1/ND4/Mtor/Hrasl1/Coa7/Ndufs2/Mlst8/Cr…
rno04141	Protein processing in endoplasmic reticulum	159	-0.170519	-0.755508	1	1	0.636621	5284	tags=39%, list=30%, signal=27%	690315/499751/286906/690038/78947/641452/83809/304962/290802/116666/100360412/63880/64202/294331/310843/116645/58817/192275/361381/499157/298068/302705/286900/361712/83725/80843/298689/65028/294993/295235/114590/116643/287276/140639/100362805/171129/287155/361367/84026/317396/58842/54318/289085/295319/287280/246146/362859/362356/288444/298012/156117/310633/192235/295690/24963/361233/297522/362226…	Derl3/Man1b1/Pdia6/Bag2/Mogs/Ube2d2/Nsfl1c/Atf6/Ubxn8/Lman1/Dnajc1/Dnajc3/Calr/Ube2g2/Sec24d/Plaa/Sec23a/Dad1/Rad23a/Svip/Sec61b/Mbtps2/Selenos/Syvn1/Wfs1/Sec61a1/Ube2j2/Dnaja1/Hspa4l/Ssr2/Ubqln1/Vcp/Sar1b/Nploc4/Txndc5/Uggt1/Stub1/Amfr/Dnaja2/Ubqln2/Preb/Eif2s1/Edem3/Man1a2/Skp1/Hspbp1/Ckap4/Cul1/Hsph1/Rad23b/Casp12/Ubqln4/Hyou1/Dnajc10/Hspa1l/Ssr1/Sec13/Sec23b/Calr4/Atf6b/Dnajb11/Cryab
rno03083	Polycomb repressive complex	81	-0.16752	-0.674439	1	1	0.636621	5100	tags=31%, list=29%, signal=22%	688041/641452/362093/100360453/58967/313048/306257/84576/312690/307151/288306/296653/300320/83712/313978/287280/361178/312299/84577/303753/309550/363519/100360260/304419/303907	Suz12/Ube2d2/Wdr5/Cbx3l2/Sfmbt1/Rbbp4/Bap1/Hdac1l/Phc1/Bmi1/Usp16/Phf19/L3mbtl2/Rbbp7/E2f6/Skp1/Tfdp1/Ezh2/Hdac2/Foxk2/L3mbtl3/Hcfc1/Cbx3l1/Auts2/Wdr5b
rno04120	Ubiquitin mediated proteolysis	137	0.161388	0.522417	1	1	0.636621	2331	tags=9%, list=13%, signal=8%	78971/116667/500511/89829/314856/294328/103691088/295704/309722/24874/306004/100362121	Birc3/Map3k1/Ube2u/Socs3/Mdm2/Aire/Elocl1/Ube2l6/Rhobtb1/Vhl/Rhobtb2/Ddb2

## Sheet: Treatment vs Model
ID	Description	setSize	enrichmentScore	NES	pvalue	p.adjust	qvalue	rank	leading_edge	core_enrichment	core_enrichment_symbol
rno04657	IL-17 signaling pathway	78	-0.751621	-2.32404	1e-10	4.175e-09	2.84211e-09	802	tags=31%, list=5%, signal=29%	24498/29538/301291/309114/25493/25445/29527/29513/171045/683206/24835/116630/171052/171551/25610/24770/245920/81687/114105/24494/81503/287561/60665/170496	Il6/Ccl20/Il17f/Muc5b/Nfkbia/Fosl1/Ptgs2/Mapk13/Mmp3/Tnfaip3/Tnf/Csf2/Mmp13/Cxcl3/Csf3/Ccl2/Cxcl10/Mmp9/Cxcl2/Il1b/Cxcl1/Ccl7/Cxcl6/Lcn2
rno04061	Viral protein interaction with cytokine and cytokine receptor	61	-0.759704	-2.27167	1e-10	4.175e-09	2.84211e-09	1807	tags=56%, list=10%, signal=50%	373540/29363/305236/170819/287673/362505/114492/24499/60628/25746/156767/360579/78965/24498/681145/362506/29538/89808/140924/498951/25325/24835/25542/116637/81780/171551/366518/24770/245920/306748/114105/81503/287561/60665	Il18rap/Cxcr5/Cxcl11/Il24/Ccr7/Ccl27/Ccl28/Il6r/Cxcr4/Il2rb/Tnfrsf1b/Ccl9/Csf1/Il6/Il19/Ccl19/Ccl20/Cx3cl1/Il2rg/Il34/Il10/Tnf/Ccl3/Ccl4/Ccl5/Cxcl3/Tnfrsf14/Ccl2/Cxcl10/Cxcl14/Cxcl2/Cxcl1/Ccl7/Cxcl6
rno00010	Glycolysis / Gluconeogenesis	63	-0.749278	-2.24379	1e-10	4.175e-09	2.84211e-09	1535	tags=46%, list=9%, signal=42%	25058/24645/100362738/24533/29634/24383/24333/500959/24189/24642/24849/498731/25630/25741/24385/24651/171178/292804/60416/25059/24334/24190/25375/24644/499525/24191/25060/24172/310903	Hk1/Pgm1/Pkml1/Ldha/Ldhc/Gapdh/Eno1/Tpi1l1/Aldoa/Pgam1/Tpi1/Tpi1l2/Pkm/Pfkl/Gck/Pklr/Adh7/Gpi/Pfkp/Hk2/Eno2/Aldob/Aldh3a1/Pgk1/Pgk1l1/Aldoc/Hk3/Adh1c/Adh6
rno05323	Rheumatoid arthritis	71	-0.729285	-2.2277	1e-10	4.175e-09	2.84211e-09	2193	tags=52%, list=13%, signal=46%	29260/29757/24516/83615/361795/25408/24981/25464/308995/300339/294273/498666/294270/78965/312488/309684/24498/309621/29538/294269/83785/25660/25732/171045/310553/24835/309622/25542/116630/81780/24493/171551/24770/114105/24494/81503/60665	Tlr4/Atp6v0a1/Jun/Atp6ap1/Ltb/Cd80/RT1-Db2/Icam1/Itgal/Mmp1/RT1-DMb/Tnfsf13b/RT1-Db1/Csf1/Atp6v1b1/Itgb2/Il6/RT1-Ba/Ccl20/RT1-Da/Vegfa/Cd28/Acp5/Mmp3/Tlr2/Tnf/RT1-Bb/Ccl3/Csf2/Ccl5/Il1a/Cxcl3/Ccl2/Cxcl2/Il1b/Cxcl1/Cxcl6
rno04668	TNF signaling pathway	114	-0.664935	-2.15187	1e-10	4.175e-09	2.84211e-09	1334	tags=28%, list=8%, signal=26%	24253/89829/156767/78965/60584/25544/78971/24498/29538/315139/116596/25493/89808/29527/291912/303690/29513/246208/171045/683206/680611/24835/116630/81780/171551/24770/245920/81687/114105/24494/81503/60665	Cebpb/Socs3/Tnfrsf1b/Csf1/Lif/Sele/Birc3/Il6/Ccl20/Tab1/Map3k8/Nfkbia/Cx3cl1/Ptgs2/Nod2/Rhbdf2/Mapk13/Ifi47/Mmp3/Tnfaip3/Bcl3/Tnf/Csf2/Ccl5/Cxcl3/Ccl2/Cxcl10/Mmp9/Cxcl2/Il1b/Cxcl1/Cxcl6
rno04060	Cytokine-cytokine receptor interaction	210	-0.635211	-2.14958	1e-10	4.175e-09	2.84211e-09	2276	tags=44%, list=13%, signal=39%	25644/81811/252963/361795/24504/83711/25196/289635/310132/373540/29363/116996/305236/500311/170819/362076/59304/29530/287034/64549/500910/287673/362505/680609/362628/501996/114492/25663/365581/114103/29381/24536/24499/25647/25366/100124593/679119/25069/60628/25746/298518/498666/156767/25466/683163/360579/78965/60584/29455/24596/252835/500318/24498/681145/89814/497942/252878/362506/294503/29538/17…	Bmp6/Thpol1/Il13ra1/Ltb/Inha/Inhbe/Inhbb/Rell1/Osmr/Il18rap/Cxcr5/Il16/Cxcl11/Gdf3/Il24/Il36b/Gdf9/Amhr2/Tnfrsf17/Inhbc/Tnfrsf13c/Ccr7/Ccl27/Ebi3/Ifnlr1/Il25/Ccl28/Il1r1/Edar/Il5ra/Acvr1b/Lepr/Il6r/Il7/Acvr2b/Cxcr6/Bmp8b/Tnfrsf8/Cxcr4/Il2rb/Csf3r/Tnfsf13b/Tnfrsf1b/Il1rap/Tnfsf8/Ccl9/Csf1/Lif/Gdf15/Ngfr/Gdf5/Cd27/Il6/Il19/Tnfsf4/Cxcl16/Tnfsf15/Ccl19/Nodal/Ccl20/Csf2rb/Il17f/Epo/Il12b/Il9r/Cx3cl1/C…
rno04110	Cell cycle	153	0.498339	2.23257	1e-10	4.175e-09	2.84211e-09	4465	tags=53%, list=26%, signal=40%	29685/25729/291885/316273/313479/360621/64515/29728/500870/287961/294790/312538/25515/301701/114494/680006/315852/288532/25737/292206/685055/308937/684771/291927/171576/297176/25203/300121/315330/361662/311327/360908/360748/140583/84576/312046/84577/116651/296137/171150/680111/362485/25717/54237/24577/300711/64193/363088/287280/361178/691979/360643/29357/291105/361195/363174/362356/56011/308768/8…	Mcm6/Ccne1/Mcm5/Mcm3/Orc1/Cdc6/Cdc20/Mcm4/Mtbp/Cdc45/Skp2/Mcm2/Plk1/Ndc80/Ccna2/Mad1l1/Ttk/Mcm7/Pcna/Trip13/Atr/Wee1/Cdca5/Orc6/Bub1b/Mad2l1/Ccnb1/Smc1b/Espl1/Bub3/Knl1/Cdc7/Prkdc/Chek1/Hdac1l/Dbf4/Hdac2/E2f5/Bub1/Cdk7/Rbl1/Ccne2/Tgfb3/Cdk1/Myc/Atm/Pttg1/Ccnb2/Skp1/Tfdp1/Esco2/Cdc27/Smad2/E2f3/Cdc14b/Sgo1/Cul1/Ywhab/Ticrr/Tgfb2/Cdkn2c/Ppp2cal1/Ppp2ca/Cdkn2d/Anapc5/Orc2/Cdc25a/E2f4/Cdk2/Pds5a/Ddx1…
rno03008	Ribosome biogenesis in eukaryotes	153	0.593503	2.6589	1e-10	4.175e-09	2.84211e-09	6263	tags=86%, list=36%, signal=55%	361262/362214/120095489/120095490/120095491/120095492/120098732/120098733/120098735/120098737/120099037/120099545/120100492/120101122/120102769/362498/60373/287120/102551819/499709/310720/314545/291317/308201/312706/361935/300689/690297/293828/313167/114300/287273/315045/311257/84509/312182/303456/362703/292831/317579/308653/292747/290556/291061/288564/100034253/102238592/120095374/120101109/1201…	Heatr1/Nop56/LOC120095489/LOC120095490/LOC120095491/LOC120095492/LOC120098732/LOC120098733/LOC120098735/LOC120098737/LOC120099037/LOC120099545/LOC120100492/LOC120101122/LOC120102769/Mdn1/Nop58/Tbl3/LOC102551819/Gar1/Wdr3/Wdr75/Rpp38/Riok2/Emg1/Afg2a/Rexo2/Pwp2/Mphosph10/Nol6/Gtpbp4/Nhp2/Pop1/Nat10/Ran/Rbm28/Utp18/Wdr43/Pop4/Utp14a/Nxf2/Fbl/Gnl3/Riok1/Pop7/Gnl3l/Ak6/LOC120095374/LOC120101109/LOC12…
rno03013	Nucleocytoplasmic transport	100	0.550752	2.35492	8.69974e-10	3.22857e-08	2.19783e-08	5642	tags=67%, list=33%, signal=45%	294392/85245/690303/365844/303029/298385/287830/362965/298075/297522/363194/690585/291874/361959/84509/362335/300259/362273/688288/308653/366016/116458/292085/117021/120095693/295692/296634/366790/290280/686774/314879/291797/679894/245922/362557/310512/368070/308939/360886/290228/315352/116555/305714/113975/296219/295284/286917/305884/311182/362607/683983/24799/24917/294429/313449/304862/304817/2…	Kpna5/Kpna2/Magohb/Nup210l/Ranbp17/Magoh/Nup85/Rangap1/Ncbp1/Sec13/Xpo5/Alyref/Nup93/Kpna4/Ran/Nup205/Aaas/Cse1l/Eif4a3/Nxf2/Nup188/Ipo13/Nup133/Nup155/LOC120095693/Nup35/Nup214/Pym1/Xpo4/Ipo8/Xpot/Thoc1/Thoc2l/Nup58/Ndc1/Nmd3/Pnn/Ipo7/Ahctf1/Ipo4/Nxt2/Nup107/Thoc7/Pom121/Nxt1/Rbm8a/Phax/Acin1/Nup160/Kpna6/Nup43/Eef1a2/Kpnb1/Ranbp2/Upf3b/Tpr/Ipo9/Thoc3/Kpna3/Nup62/Rnps1/Upf1/Ddx39b/Snupn/Thoc6/Nu…
rno05171	Coronavirus disease - COVID-19	272	-0.534693	-1.83386	9.79086e-10	3.27015e-08	2.22613e-08	5348	tags=65%, list=31%, signal=46%	297989/64306/108351377/25125/100360252/81729/81776/688784/161477/689284/309165/64156/100362366/299827/311245/79449/293846/499803/81774/26962/363817/140661/29236/499523/29285/84351/140662/66021/117042/57809/140655/29284/81765/122772/65043/124323/65136/64640/498555/81768/303815/29286/100359505/81775/360572/25738/122799/140654/81773/117053/29283/29258/100362298/64205/25348/108348980/245981/294282/36…	Rig1/Rpl27/Rpl35al2/Stat3/Rpl31l2/Rpl10a/Rps24/Rpl27l1/Rps13/Rpl38/Rela/Uba52/LOC100362366/Tbk1/Traf6/Rpl21/Rpl28l2/Rps3l1/Rps11/Rpl8/Rpl27al7/Rplp1/Rpsa/Rpl23al1/Rps15/Ikbkb/Rplp2/Cybb/Rpl6/Rpl35a/Rps16/Rps14/Rpl13/Rps20/Rpl14/Rps23/Rps8/Rpl30/Rplp2l2/Rpl22/Rpl12l2/Rps17/LOC100359505/Rps21/Rpl23a/Plcg1/Rps25/Rps3/Rps10/Rps15a/Rpl29/Rps7/Rps18l5/Rplp0/Rps29/Rps29l5/Rpl15/Rps18/Rpl11/Cfd/Rps19l3/R…
rno04062	Chemokine signaling pathway	156	-0.591098	-1.95776	4.05028e-09	1.22981e-07	8.37187e-08	2518	tags=28%, list=15%, signal=24%	498335/170538/25734/64532/114858/24514/25023/366508/29241/29363/305236/287673/362505/114492/317371/25387/100124593/294515/60628/64199/360579/80850/25156/366957/679845/497942/362506/29538/25493/89808/295378/79113/25542/116637/81760/81780/171551/24770/245920/306748/114105/81503/287561/60665	Cxcl13/Prkcd/Hck/Adcy5/Shc3/Jak2/Prkcb/Pik3cd/Adcy8/Cxcr5/Cxcl11/Ccr7/Ccl27/Ccl28/Was/Arrb1/Cxcr6/Foxo3/Cxcr4/Gng11/Ccl9/Gng2/Vav1/Rac2/Shc4/Cxcl16/Ccl19/Ccl20/Nfkbia/Cx3cl1/Vav3/Fgr/Ccl3/Ccl4/Grk1/Ccl5/Cxcl3/Ccl2/Cxcl10/Cxcl14/Cxcl2/Cxcl1/Ccl7/Cxcl6
rno05140	Leishmaniasis	63	-0.708255	-2.12094	4.72096e-09	1.314e-07	8.94498e-08	1217	tags=44%, list=7%, signal=41%	29260/116689/24516/24514/25023/24981/25021/294273/294270/309684/309621/364018/294269/315139/64546/25493/29527/29513/25325/310553/116591/498276/24835/309622/24493/24494/24599/24232	Tlr4/Ptpn6/Jun/Jak2/Prkcb/RT1-Db2/Itgam/RT1-DMb/RT1-Db1/Itgb2/RT1-Ba/Ncf2/RT1-Da/Tab1/Il12b/Nfkbia/Ptgs2/Mapk13/Il10/Tlr2/Fcgr2a/Fcgr2al1/Tnf/RT1-Bb/Il1a/Il1b/Nos2/C3
rno04066	HIF-1 signaling pathway	104	-0.627126	-2.0051	1.40719e-08	3.6154e-07	2.46116e-07	2300	tags=35%, list=13%, signal=30%	24617/24681/24874/25023/366508/29452/296269/25058/24499/83571/117276/24533/29634/24383/24333/24189/116551/103691088/25741/24498/24600/24335/83785/60416/25059/24334/24190/308913/24644/499525/24778/24191/24451/25060/54702/24599	Serpine1/Prkcg/Vhl/Prkcb/Pik3cd/Epas1/Angpt4/Hk1/Il6r/Cdkn1b/Pfkfb3/Ldha/Ldhc/Gapdh/Eno1/Aldoa/Pdk1/Elocl1/Pfkl/Il6/Nos3/Epo/Vegfa/Pfkp/Hk2/Eno2/Aldob/Egln1/Pgk1/Pgk1l1/Slc2a1/Aldoc/Hmox1/Hk3/Egln3/Nos2
rno05417	Lipid and atherosclerosis	182	-0.554616	-1.85469	1.7606e-08	3.94231e-07	2.6837e-07	2661	tags=27%, list=15%, signal=23%	25400/171068/25385/29260/24516/282817/25696/365057/24514/363328/366508/25464/25272/29467/24787/25310/300339/64625/29469/25156/25544/25166/24498/364018/24472/24600/85264/681314/140914/315139/64546/25493/364867/29513/295378/171045/310553/24835/25542/24296/171562/81780/171369/171551/24770/81687/114105/24494/81503	Camk2a/Pou2f1/Faslg/Tlr4/Jun/Pycard/Vldlr/Map3k5/Jak2/Ticam1/Pik3cd/Icam1/Mapk10/Ddit3/Sod2/Cyct/Mmp1/Bid/Lbp/Vav1/Sele/Casp1/Il6/Ncf2/Hspa1a/Nos3/Abcg1/Bax-ps2/Olr1/Tab1/Il12b/Nfkbia/Ticam2/Mapk13/Vav3/Mmp3/Tlr2/Tnf/Ccl3/Cyp1a1/Ero1a/Ccl5/Cd40/Cxcl3/Ccl2/Mmp9/Cxcl2/Il1b/Cxcl1
rno05152	Tuberculosis	144	-0.586436	-1.92858	1.7705e-08	3.94231e-07	2.6837e-07	1507	tags=26%, list=9%, signal=24%	24514/83615/114700/24981/25272/25021/25310/450223/24253/25599/294273/64625/294270/29469/155151/309684/24498/309621/85483/681314/294269/64546/289211/291912/29513/25325/310553/116591/498276/25155/316010/24835/309622/24493/24494/24599/24232	Jak2/Atp6ap1/Cyp27b1/RT1-Db2/Mapk10/Itgam/Cyct/Clec4e/Cebpb/Cd74/RT1-DMb/Bid/RT1-Db1/Lbp/Coro1a/Itgb2/Il6/RT1-Ba/Ciita/Bax-ps2/RT1-Da/Il12b/Fcgr2b/Nod2/Mapk13/Il10/Tlr2/Fcgr2a/Fcgr2al1/Syk/Camp/Tnf/RT1-Bb/Il1a/Il1b/Nos2/C3
rno04064	NF-kappa B signaling pathway	96	-0.641388	-2.03263	3.90246e-08	8.14638e-07	5.5456e-07	2144	tags=35%, list=12%, signal=31%	361795/25023/687813/363328/367901/25464/494338/686781/500910/25663/100360982/365581/81511/498666/29469/313050/78971/287824/362506/315139/25493/364867/29527/315120/683206/25155/24835/116637/171369/171551/114105/301348/24494/81503	Ltb/Prkcb/Traf1/Ticam1/Btk/Icam1/Trim25/Ppp1r13l/Tnfrsf13c/Il1r1/Relb/Edar/Lat/Tnfsf13b/Lbp/Lck/Birc3/Trim80/Ccl19/Tab1/Nfkbia/Ticam2/Ptgs2/Card10/Tnfaip3/Syk/Tnf/Ccl4/Cd40/Cxcl3/Cxcl2/Zap70/Il1b/Cxcl1
rno05133	Pertussis	70	-0.669482	-2.04421	5.92681e-08	1.16444e-06	7.92688e-07	2389	tags=37%, list=14%, signal=32%	24516/282817/24231/363328/24508/295703/25272/25021/500133/312705/25166/309684/24498/64546/364867/24236/29513/292060/192262/25325/24835/24493/24494/60665/24599/24232	Jun/Pycard/C2/Ticam1/Irf1/Serping1/Mapk10/Itgam/Nod1/C1r/Casp1/Itgb2/Il6/Il12b/Ticam2/C4bpb/Mapk13/Irf8/C1s/Il10/Tnf/Il1a/Il1b/Cxcl6/Nos2/C3
rno05134	Legionellosis	54	-0.696846	-2.0636	2.3088e-07	4.28411e-06	2.91638e-06	1507	tags=33%, list=9%, signal=31%	25021/25310/294691/25166/309684/24498/24472/191568/64546/25493/84480/310553/24835/171551/114105/24494/81503/24232	Itgam/Cyct/Naip5/Casp1/Itgb2/Il6/Hspa1a/Naip6/Il12b/Nfkbia/Bnip3/Tlr2/Tnf/Cxcl3/Cxcl2/Il1b/Cxcl1/C3
rno05146	Amoebiasis	89	-0.62049	-1.95603	3.02891e-07	5.32451e-06	3.62463e-06	2584	tags=31%, list=15%, signal=27%	29260/117254/100363379/24681/25023/366508/363265/24572/311862/29221/25021/25663/309368/309684/24498/64546/305078/266775/498209/25325/310553/24835/116630/171551/114105/24494/81503/24599	Tlr4/Prdx1/Prdx1l1/Prkcg/Prkcb/Pik3cd/Col4a3/Muc2/Lamc3/Arg1/Itgam/Il1r1/Lama2/Itgb2/Il6/Il12b/Lamb3/Serpinb10/Serpinb3a/Il10/Tlr2/Tnf/Csf2/Cxcl3/Cxcl2/Il1b/Cxcl1/Nos2
rno04145	Phagosome	137	-0.564538	-1.84893	3.40793e-07	5.69124e-06	3.87427e-06	3096	tags=34%, list=18%, signal=28%	406194/24773/29184/24598/501854/29302/500319/500363/29260/29757/83615/25304/24981/24747/360323/679312/29213/25021/294273/24811/29220/312705/24812/294270/155151/312488/309684/309621/364018/170921/294228/294269/414779/140914/309603/498638/289211/414819/310553/116591/498276/414791/309622/500377/414789/24232	RT1-T18/Sftpa1/Cd36/Nos1/Rab7b/Itgb3/Tuba3a/Tuba3b/Tlr4/Atp6v0a1/Atp6ap1/Comp/RT1-Db2/RT1-M3-1/RT1-N2/Tubb1/Tubb4a/Itgam/RT1-DMb/Tap1/Thbs4/C1r/Tap2/RT1-Db1/Coro1a/Atp6v1b1/Itgb2/RT1-Ba/Ncf2/Itga2/RT1-S3/RT1-Da/RT1-CE2/Olr1/RT1-CE1/Msr1/Fcgr2b/RT1-CE16/Tlr2/Fcgr2a/Fcgr2al1/RT1-CE11/RT1-Bb/Tuba8/RT1-CE15/C3
rno05321	Inflammatory bowel disease	48	-0.697427	-2.01883	7.91479e-07	1.25883e-05	8.5694e-06	2637	tags=52%, list=15%, signal=44%	301365/317382/29260/24516/289337/24981/373540/294273/300807/294270/24498/362896/309621/301291/294269/64546/140924/291912/171333/25325/310553/24835/309622/24493/24494	Il18r1/Foxp3/Tlr4/Jun/Tlr5/RT1-Db2/Il18rap/RT1-DMb/Rora/RT1-Db1/Il6/Stat6/RT1-Ba/Il17f/RT1-Da/Il12b/Il2rg/Nod2/Il12rb1/Il10/Tlr2/Tnf/RT1-Bb/Il1a/Il1b
rno00051	Fructose and mannose metabolism	37	-0.73818	-2.04019	1.15743e-06	1.74481e-05	1.18777e-05	1535	tags=43%, list=9%, signal=40%	25058/296972/117276/500959/24189/116463/24849/498731/25741/60416/25059/24190/24191/286921/25659/25060	Hk1/Akr1b10/Pfkfb3/Tpi1l1/Aldoa/Akr1b7/Tpi1/Tpi1l2/Pfkl/Pfkp/Hk2/Aldob/Aldoc/Akr1b8/Khk/Hk3
rno05332	Graft-versus-host disease	33	-0.755183	-2.05808	1.20152e-06	1.74481e-05	1.18777e-05	2038	tags=61%, list=12%, signal=54%	25408/24981/24747/360323/294273/294270/24498/309621/294228/294269/414779/25660/309603/414819/414791/24835/309622/24493/414789/24494	Cd80/RT1-Db2/RT1-M3-1/RT1-N2/RT1-DMb/RT1-Db1/Il6/RT1-Ba/RT1-S3/RT1-Da/RT1-CE2/Cd28/RT1-CE1/RT1-CE16/RT1-CE11/Tnf/RT1-Bb/Il1a/RT1-CE15/Il1b
rno05340	Primary immunodeficiency	28	-0.777717	-2.05019	1.66168e-06	2.3125e-05	1.57422e-05	2009	tags=50%, list=12%, signal=44%	367901/24930/500910/24811/24812/313050/85483/365367/140924/294328/24699/294797/171369/301348	Btk/Cd8a/Tnfrsf13c/Tap1/Tap2/Lck/Ciita/Cd19/Il2rg/Aire/Ptprc/Il7r/Cd40/Zap70
rno04640	Hematopoietic cell lineage	71	-0.637948	-1.9487	1.86708e-06	2.49442e-05	1.69806e-05	3642	tags=63%, list=21%, signal=50%	24936/294274/289395/60427/29185/60350/24931/294051/25704/29184/25084/29302/25406/81811/24981/305081/140635/24930/25021/25663/114103/24499/25647/691992/294273/298518/502858/294270/78965/24498/309621/170921/365367/81641/294269/24335/24500/294797/24835/309622/116630/24336/24493/25610/24494	Cd9/RT1-DMa/Cr2/Kitlg/Cd37/Cd14/Cd8b/Dntt/Il2ra/Cd36/Il4r/Itgb3/Cd44/Thpol1/RT1-Db2/Cd34/Flt3/Cd8a/Itgam/Il1r1/Il5ra/Il6r/Il7/Gp1ba/RT1-DMb/Csf3r/Gp9/RT1-Db1/Csf1/Il6/RT1-Ba/Itga2/Cd19/Anpep/RT1-Da/Epo/Il9r/Il7r/Tnf/RT1-Bb/Csf2/Epor/Il1a/Csf3/Il1b
rno05168	Herpes simplex virus 1 infection	167	-0.534746	-1.77965	2.0135e-06	2.58657e-05	1.76079e-05	2079	tags=25%, list=12%, signal=22%	363328/366508/24981/192183/498840/24747/192281/360323/363899/246268/25310/25599/294273/24811/89829/64625/24812/294270/78971/24498/309621/378947/681314/294228/294269/414779/315139/64546/25493/309603/414819/310553/414791/25155/24835/309622/81780/414789/366518/24770/24494/24232	Ticam1/Pik3cd/RT1-Db2/Nectin1/Sting1/RT1-M3-1/Oas1a/RT1-N2/Pilrb2l5/Oas1b/Cyct/Cd74/RT1-DMb/Tap1/Socs3/Bid/Tap2/RT1-Db1/Birc3/Il6/RT1-Ba/Bst2/Bax-ps2/RT1-S3/RT1-Da/RT1-CE2/Tab1/Il12b/Nfkbia/RT1-CE1/RT1-CE16/Tlr2/RT1-CE11/Syk/Tnf/RT1-Bb/Ccl5/RT1-CE15/Tnfrsf14/Ccl2/Il1b/C3
rno05330	Allograft rejection	34	-0.742287	-2.03692	2.23192e-06	2.76097e-05	1.87952e-05	2038	tags=59%, list=12%, signal=52%	25408/24981/24747/360323/294273/294270/309621/294228/294269/414779/25660/64546/309603/414819/25325/414791/24835/309622/171369/414789	Cd80/RT1-Db2/RT1-M3-1/RT1-N2/RT1-DMb/RT1-Db1/RT1-Ba/RT1-S3/RT1-Da/RT1-CE2/Cd28/Il12b/RT1-CE1/RT1-CE16/Il10/RT1-CE11/Tnf/RT1-Bb/Cd40/RT1-CE15
rno04621	NOD-like receptor signaling pathway	150	-0.541845	-1.78891	2.40928e-06	2.87393e-05	1.95641e-05	2079	tags=25%, list=12%, signal=22%	170538/24516/282817/363328/25679/498840/25272/192281/300732/246268/689161/294691/310917/500133/297508/78971/25166/24498/304987/117514/171164/294329/191568/685067/315139/25493/291912/29513/683206/316010/24835/81780/171551/24770/114105/24494/81503	Prkcd/Jun/Pycard/Ticam1/Itpr3/Sting1/Mapk10/Oas1a/Pstpip1/Oas1b/Gabarapl1/Naip5/Gbp4/Nod1/Nampt/Birc3/Casp1/Il6/Aim2/Txnip/Gbp2/Trpm2/Naip6/Gbp7/Tab1/Nfkbia/Nod2/Mapk13/Tnfaip3/Camp/Tnf/Ccl5/Cxcl3/Ccl2/Cxcl2/Il1b/Cxcl1
rno03030	DNA replication	35	0.663518	2.27656	3.88655e-06	4.47623e-05	3.04717e-05	3200	tags=69%, list=18%, signal=56%	29685/291885/316273/304573/85242/29728/312538/288532/25737/59294/246327/81513/116468/304528/288414/299112/287524/298098/59102/289758/85241/309762/361056/296883	Mcm6/Mcm5/Mcm3/Pole/Pola2/Mcm4/Mcm2/Mcm7/Pcna/Pold1/Prim1/Lig1/Rfc2/Rfc5/Rfc3/Pole2/Rpa1/Pole3/Rpa2/Pold2/Pola1/Dna2/Rnaseh2b/Rpa3
rno04630	JAK-STAT signaling pathway	125	-0.548263	-1.7899	9.21699e-06	0.000102616	6.98551e-05	3228	tags=36%, list=19%, signal=30%	681112/689932/25704/24657/288264/25084/501043/114851/117539/116689/25267/81811/24514/252963/366508/83681/310132/316421/170819/362628/114103/24536/24499/25647/89829/25746/298518/60584/444986/24498/362896/681145/171081/54349/24335/64546/24500/313173/140924/171333/25325/294797/116630/24336/25610	Il20/Il23r/Il2ra/Prl6a1/Ifnar1/Il4r/Il20rb/Cdkn1a/Il10ra/Ptpn6/Pdgfra/Thpol1/Jak2/Il13ra1/Pik3cd/Cish/Osmr/Aox2/Il24/Ifnlr1/Il5ra/Lepr/Il6r/Il7/Socs3/Il2rb/Csf3r/Lif/Il22ra2/Il6/Stat6/Il19/Csf2rb/Aox1/Epo/Il12b/Il9r/Cntfr/Il2rg/Il12rb1/Il10/Il7r/Csf2/Epor/Csf3
rno04612	Antigen processing and presentation	59	-0.64919	-1.94239	9.63997e-06	0.000103863	7.0704e-05	1937	tags=36%, list=11%, signal=32%	24981/24747/360323/24930/25599/294273/24811/24812/294270/309621/85483/24472/294228/294269/414779/309603/414819/414791/24835/309622/414789	RT1-Db2/RT1-M3-1/RT1-N2/Cd8a/Cd74/RT1-DMb/Tap1/Tap2/RT1-Db1/RT1-Ba/Ciita/Hspa1a/RT1-S3/RT1-Da/RT1-CE2/RT1-CE1/RT1-CE16/RT1-CE11/Tnf/RT1-Bb/RT1-CE15
rno04940	Type I diabetes mellitus	41	-0.695192	-1.98051	1.15188e-05	0.000120227	8.18441e-05	2038	tags=51%, list=12%, signal=45%	25408/24981/24747/360323/294273/294270/309621/294228/294269/414779/25660/64546/309603/29714/414819/414791/24835/309622/24493/414789/24494	Cd80/RT1-Db2/RT1-M3-1/RT1-N2/RT1-DMb/RT1-Db1/RT1-Ba/RT1-S3/RT1-Da/RT1-CE2/Cd28/Il12b/RT1-CE1/Ptprn2/RT1-CE16/RT1-CE11/Tnf/RT1-Bb/Il1a/RT1-CE15/Il1b
rno04978	Mineral absorption	57	-0.638046	-1.896	1.68655e-05	0.000170699	0.000116203	2196	tags=40%, list=13%, signal=35%	24214/84396/114246/500804/25548/365549/499244/100362384/100359668/29292/120102993/501644/25552/300051/84395/29639/25319/304784/24218/24451/500946/24567/689415	Atp1b2/Atp1b4/Trpv6/Ftl1l5/Slc34a1/Slc5a1l1/Ftl1l7/LOC100362384/Ftl1l2/Ftl1/LOC120102993/Ftl1l1/Slc5a1/Slc39a4/Slc34a2/Fxyd2/Fth1/Slc26a9/Atp7b/Hmox1/Hephl1/Mt1/Mt2A
rno05206	MicroRNAs in cancer	218	-0.485205	-1.64372	1.82428e-05	0.000179209	0.000121995	3172	tags=32%, list=18%, signal=27%	100313988/100314021/100314022/100313997/100313998/100314011/100314153/100314014/100314262/29337/246334/114851/29302/25406/100314181/94268/84580/100313972/25267/64547/54319/24681/25023/366508/100314224/100314020/29496/100314290/100314075/100313990/83571/314856/100314228/100314277/25426/100314006/304785/100314000/25279/100314213/104797223/100314007/100314015/100314159/100314242/170913/24646/1003139…	Mir101-2/Mir103a1/Mir107/Mir16/Mir17/Mir30a/Mir30e/Mir34c/Mir181d/Plcg2/Tp63/Cdkn1a/Itgb3/Cd44/Mir324/Efna1/Hdac5/Mirlet7d/Pdgfra/Bcl2l11/Ezr/Prkcg/Prkcb/Pik3cd/Mirlet7c2/Mir103a2/Erbb3/Mir26a/Mir224/Mirlet7b/Cdkn1b/Mdm2/Mir23a/Mirlet7f-1os/Cyp1b1/Mir27a/Slc45a3/Mir21/Cyp24a1/Mirlet7a1/Mir193b/Mir29b2/Mir34a/Mir181b2/Mir181c/Abcb1a/Abcb1b/Mirlet7i/Shc4/Mir3556b/Mir152/Mir221/Mir27b/Notch4/Mir23b/…
rno04659	Th17 cell differentiation	87	-0.573817	-1.80132	2.16116e-05	0.000206236	0.000140394	4070	tags=48%, list=23%, signal=37%	360697/361400/311658/303496/116465/301252/24918/294274/24705/25631/689932/25704/25084/25300/317382/24516/24514/24981/25272/680609/25663/24499/316241/294273/300807/25746/81511/294270/25466/313050/24498/362896/309621/301291/294269/25493/140924/29513/171333/309622/301348/24494	Ifngr2/Nfatc3/Nfatc2/Tbx21/Ifngr1/Hsp90ab1/Stat5a/RT1-DMa/Rara/Smad3/Il23r/Il2ra/Il4r/Cd247/Foxp3/Jun/Jak2/RT1-Db2/Mapk10/Ebi3/Il1r1/Il6r/Nfkbie/RT1-DMb/Rora/Il2rb/Lat/RT1-Db1/Il1rap/Lck/Il6/Stat6/RT1-Ba/Il17f/RT1-Da/Nfkbia/Il2rg/Mapk13/Il12rb1/RT1-Bb/Zap70/Il1b
rno04620	Toll-like receptor signaling pathway	87	-0.570129	-1.78975	3.17074e-05	0.000294174	0.000200257	2154	tags=26%, list=12%, signal=23%	289337/363328/366508/25408/25272/305236/29469/25353/24498/315139/64546/116596/25493/364867/29513/310553/24835/25542/116637/81780/171369/245920/24494	Tlr5/Ticam1/Pik3cd/Cd80/Mapk10/Cxcl11/Lbp/Spp1/Il6/Tab1/Il12b/Map3k8/Nfkbia/Ticam2/Mapk13/Tlr2/Tnf/Ccl3/Ccl4/Ccl5/Cd40/Cxcl10/Il1b
rno05150	Staphylococcus aureus infection	53	-0.636018	-1.88417	5.23332e-05	0.000472413	0.000321592	1937	tags=38%, list=11%, signal=34%	24981/25464/308995/25021/287700/294273/312705/294270/309684/309621/294269/289211/294853/192262/25325/116591/498276/316010/309622/24232	RT1-Db2/Icam1/Itgal/Itgam/Krt15/RT1-DMb/C1r/RT1-Db1/Itgb2/RT1-Ba/RT1-Da/Fcgr2b/Krt18/C1s/Il10/Fcgr2a/Fcgr2al1/Camp/RT1-Bb/C3
rno05320	Autoimmune thyroid disease	35	-0.696639	-1.92606	7.68604e-05	0.000675562	0.000459885	2038	tags=54%, list=12%, signal=48%	25408/24981/24747/360323/294273/116700/294270/309621/294228/294269/414779/25660/309603/414819/25325/414791/309622/171369/414789	Cd80/RT1-Db2/RT1-M3-1/RT1-N2/RT1-DMb/Cga/RT1-Db1/RT1-Ba/RT1-S3/RT1-Da/RT1-CE2/Cd28/RT1-CE1/RT1-CE16/Il10/RT1-CE11/RT1-Bb/Cd40/RT1-CE15
rno05169	Epstein-Barr virus infection	186	-0.484113	-1.6243	9.46875e-05	0.000810913	0.000552024	3096	tags=31%, list=18%, signal=25%	406194/25217/288264/25112/29337/114851/25300/25406/24223/362268/309452/24516/64547/100362121/366508/367901/24981/25464/24747/308995/25272/192281/360323/680122/246268/25310/100360982/83571/314856/316241/679028/294273/24811/64625/24812/294270/24498/309621/365367/681314/294228/294269/414779/315139/25493/309603/29513/414819/683206/310553/414791/25155/24835/309622/171369/414789/245920	RT1-T18/Tapbp/Ifnar1/Gadd45a/Plcg2/Cdkn1a/Cd247/Cd44/B2m/Rbpjl/Nfkb2/Jun/Bcl2l11/Ddb2/Pik3cd/Btk/RT1-Db2/Icam1/RT1-M3-1/Itgal/Mapk10/Oas1a/RT1-N2/Sap30/Oas1b/Cyct/Relb/Cdkn1b/Mdm2/Nfkbie/Rbpj/RT1-DMb/Tap1/Bid/Tap2/RT1-Db1/Il6/RT1-Ba/Cd19/Bax-ps2/RT1-S3/RT1-Da/RT1-CE2/Tab1/Nfkbia/RT1-CE1/Mapk13/RT1-CE16/Tnfaip3/Tlr2/RT1-CE11/Syk/Tnf/RT1-Bb/Cd40/RT1-CE15/Cxcl10
rno05145	Toxoplasmosis	99	-0.542629	-1.72841	0.000105467	0.000880649	0.000599497	1937	tags=25%, list=11%, signal=23%	24981/25272/50664/311862/25310/294273/25290/309368/294270/78971/309621/85483/24472/294269/315139/64546/25493/305078/29513/25325/310553/24835/309622/171369/24599	RT1-Db2/Mapk10/Gnao1/Lamc3/Cyct/RT1-DMb/Alox5/Lama2/RT1-Db1/Birc3/RT1-Ba/Ciita/Hspa1a/RT1-Da/Tab1/Il12b/Nfkbia/Lamb3/Mapk13/Il10/Tlr2/Tnf/RT1-Bb/Cd40/Nos2
rno05322	Systemic lupus erythematosus	70	-0.581395	-1.77524	0.000117732	0.000959089	0.000652894	2733	tags=36%, list=16%, signal=30%	406161/308901/295277/24231/689408/25408/24981/24237/291157/294273/312705/294270/309621/294269/25660/24409/680322/192262/25325/116591/498276/24835/309622/171369/24232	C4b/Trim21/H4c14/C2/H2az2l2/Cd80/RT1-Db2/C6/Hist1h2bo/RT1-DMb/C1r/RT1-Db1/RT1-Ba/RT1-Da/Cd28/Grin2a/H2ac12/C1s/Il10/Fcgr2a/Fcgr2al1/Tnf/RT1-Bb/Cd40/C3
rno04672	Intestinal immune network for IgA production	34	-0.680138	-1.86638	0.000131183	0.00104322	0.000710165	2038	tags=62%, list=12%, signal=55%	294274/24772/499415/282832/56822/25408/24981/287034/500910/114492/294273/60628/498666/294270/24498/309621/294269/25660/25325/309622/171369	RT1-DMa/Cxcl12/Icoslg/Ccr9/Cd86/Cd80/RT1-Db2/Tnfrsf17/Tnfrsf13c/Ccl28/RT1-DMb/Cxcr4/Tnfsf13b/RT1-Db1/Il6/RT1-Ba/RT1-Da/Cd28/Il10/RT1-Bb/Cd40
rno05418	Fluid shear stress and atherosclerosis	131	-0.516948	-1.68941	0.000138328	0.00107445	0.000731426	2703	tags=26%, list=16%, signal=22%	29302/113894/25260/24516/24426/365057/306330/25692/366508/300850/25464/29487/25272/25663/24314/66026/25366/501110/29583/366957/25544/364018/24771/24600/83785/24421/29513/24451/24835/24493/24770/81687/24494/25698	Itgb3/Sqstm1/Gstt1/Jun/Gstp1/Map3k5/Klf2/Plat/Pik3cd/Gsta4/Icam1/Gstt2/Mapk10/Il1r1/Nqo1/Trpv4/Acvr2b/Gsta6/Pecam1/Rac2/Sele/Ncf2/Sdc4/Nos3/Vegfa/Gsta1/Mapk13/Hmox1/Tnf/Il1a/Ccl2/Mmp9/Il1b/Ass1
rno04936	Alcoholic liver disease	122	-0.516306	-1.68483	0.00014812	0.00112437	0.000765407	2609	tags=25%, list=15%, signal=21%	25385/83506/29260/499358/25086/24231/365057/161452/363328/25272/83516/116719/313977/294515/64562/29469/24498/171178/315139/64546/25493/29513/24835/171551/24172/310903/114105/24494/81503/24232	Faslg/Camkk2/Tlr4/Scd4/Cyp2e1/C2/Map3k5/Lef1/Ticam1/Mapk10/Ppargc1a/Acacb/Lpin1/Foxo3/Prkab2/Lbp/Il6/Adh7/Tab1/Il12b/Nfkbia/Mapk13/Tnf/Cxcl3/Adh1c/Adh6/Cxcl2/Il1b/Cxcl1/C3
rno05142	Chagas disease	93	-0.544899	-1.72183	0.000175269	0.00130089	0.00088557	802	tags=27%, list=5%, signal=26%	309242/25300/25385/29260/24516/24617/363328/366508/117256/25272/50664/24498/64546/25493/25245/29513/25325/310553/24835/25542/81780/24770/24494/24599/24232	Gna14/Cd247/Faslg/Tlr4/Jun/Serpine1/Ticam1/Pik3cd/Ppp2r2c/Mapk10/Gnao1/Il6/Il12b/Nfkbia/Bdkrb2/Mapk13/Il10/Tlr2/Tnf/Ccl3/Ccl5/Ccl2/Il1b/Nos2/C3
rno05416	Viral myocarditis	70	-0.575678	-1.75779	0.000189564	0.0013764	0.000936976	2038	tags=36%, list=12%, signal=32%	25408/24981/25464/24747/308995/360323/364605/25310/294273/64625/309368/294270/366957/309684/309621/294228/294269/414779/25660/309603/414819/414791/309622/171369/414789	Cd80/RT1-Db2/Icam1/RT1-M3-1/Itgal/RT1-N2/Sgcz/Cyct/RT1-DMb/Bid/Lama2/RT1-Db1/Rac2/Itgb2/RT1-Ba/RT1-S3/RT1-Da/RT1-CE2/Cd28/RT1-CE1/RT1-CE16/RT1-CE11/RT1-Bb/Cd40/RT1-CE15
rno01200	Carbon metabolism	108	-0.518643	-1.66986	0.000256462	0.00182251	0.00124067	1551	tags=24%, list=9%, signal=22%	290566/24248/314140/25058/100362738/298655/24383/24333/500959/24189/24642/24849/498731/25630/25741/24385/24651/292804/60416/25059/24334/24190/24644/499525/24191/25060	Ogdhl/Cat/Prps1l3/Hk1/Pkml1/H6pd/Gapdh/Eno1/Tpi1l1/Aldoa/Pgam1/Tpi1/Tpi1l2/Pkm/Pfkl/Gck/Pklr/Gpi/Pfkp/Hk2/Eno2/Aldob/Pgk1/Pgk1l1/Aldoc/Hk3
rno05163	Human cytomegalovirus infection	208	-0.454856	-1.53626	0.00027567	0.0019182	0.00130581	2724	tags=23%, list=16%, signal=19%	114851/29302/24223/25385/117539/64532/25267/24681/25023/25679/366508/29241/498840/24747/303634/50664/360323/25310/25663/24499/314856/24811/60628/64199/64625/24812/80850/366957/24498/681314/294228/414779/83785/25493/309603/89808/29527/29513/414819/414791/24835/25542/116637/81780/414789/24770/24494	Cdkn1a/Itgb3/B2m/Faslg/Il10ra/Adcy5/Pdgfra/Prkcg/Prkcb/Itpr3/Pik3cd/Adcy8/Sting1/RT1-M3-1/Gna13/Gnao1/RT1-N2/Cyct/Il1r1/Il6r/Mdm2/Tap1/Cxcr4/Gng11/Bid/Tap2/Gng2/Rac2/Il6/Bax-ps2/RT1-S3/RT1-CE2/Vegfa/Nfkbia/RT1-CE1/Cx3cl1/Ptgs2/Mapk13/RT1-CE16/RT1-CE11/Tnf/Ccl3/Ccl4/Ccl5/RT1-CE15/Ccl2/Il1b
rno04514	Cell adhesion molecules	137	-0.489276	-1.60244	0.000287863	0.00196216	0.00133573	3309	tags=47%, list=19%, signal=38%	56822/24931/114588/155268/304125/29409/301626/406194/29259/304073/24586/117096/304388/308417/117258/290789/362800/24796/300519/680489/25408/24981/192183/116690/116647/305081/25464/24747/308995/360323/25752/24930/25021/619374/60391/641521/29583/294273/84008/294270/83502/116595/25544/690899/309684/309621/287098/24771/303926/311426/499342/294228/294269/414779/25660/309603/414819/315610/414791/24699/…	Cd86/Cd8b/Cdh4/Cldn16/Cldn17/Mag/Pdcd1/RT1-T18/Sell/Cldn14/Ncam1/Nlgn2/Cldn15/Nectin2/Cntn1/Cldn23/Itgb8/Spn/Esam/Cldn34e/Cd80/RT1-Db2/Nectin1/Nfasc/Nlgn1/Cd34/Icam1/RT1-M3-1/Itgal/RT1-N2/Cd6/Cd8a/Itgam/Jam2/Nrxn1/Lrrc4/Pecam1/RT1-DMb/Cntnap1/RT1-Db1/Cdh1/Nrxn2/Sele/Vsir/Itgb2/RT1-Ba/Cldn6/Sdc4/Igsf11/Siglec1/Cd274/RT1-S3/RT1-Da/RT1-CE2/Cd28/RT1-CE1/RT1-CE16/Jaml/RT1-CE11/Ptprc/RT1-Bb/Cldn1/Cd40/…
rno04658	Th1 and Th2 cell differentiation	72	-0.565189	-1.73131	0.000317573	0.00212139	0.00144412	4271	tags=51%, list=25%, signal=39%	314322/156726/360697/361400/311658/303496/310405/116465/24918/294274/25704/25084/25300/362268/24516/24514/24981/84010/25272/316241/679028/294273/25746/81511/294270/313050/362896/309621/294269/64546/25493/140924/29513/171333/309622/29147/301348	Fos/Runx3/Ifngr2/Nfatc3/Nfatc2/Tbx21/Maml3/Ifngr1/Stat5a/RT1-DMa/Il2ra/Il4r/Cd247/Rbpjl/Jun/Jak2/RT1-Db2/Dll1/Mapk10/Nfkbie/Rbpj/RT1-DMb/Il2rb/Lat/RT1-Db1/Lck/Stat6/RT1-Ba/RT1-Da/Il12b/Nfkbia/Il2rg/Mapk13/Il12rb1/RT1-Bb/Jag2/Zap70
rno05164	Influenza A	137	-0.487325	-1.59605	0.000337069	0.00220279	0.00149954	2333	tags=25%, list=13%, signal=22%	282817/24514/25023/363328/366508/24981/25464/494338/192281/307920/29268/246268/25310/294273/89829/64625/294270/25166/24498/309621/287824/85483/681314/294269/64546/25493/24835/309622/65190/81780/24493/24770/245920/24494	Pycard/Jak2/Prkcb/Ticam1/Pik3cd/RT1-Db2/Icam1/Trim25/Oas1a/Pabpn1l/Tpsb2/Oas1b/Cyct/RT1-DMb/Socs3/Bid/RT1-Db1/Casp1/Il6/RT1-Ba/Trim80/Ciita/Bax-ps2/RT1-Da/Il12b/Nfkbia/Tnf/RT1-Bb/Rsad2/Ccl5/Il1a/Ccl2/Cxcl10/Il1b
rno00982	Drug metabolism - cytochrome P450	43	-0.631188	-1.81453	0.00034295	0.00220279	0.00149954	4191	tags=63%, list=24%, signal=48%	309147/289197/316424/171341/246247/24423/498340/24861/297029/688800/295037/84493/25260/24426/25086/300850/29487/316421/246245/501110/25256/171178/54349/24421/25375/24172/310903	Aldh3b1/Mgst3/Aox4/Mgst1/Fmo4/Gstm1/Mgst3l1/Ugt1a1/Gstk1/Aldh3b2/Mgst2/Fmo3/Gstt1/Gstp1/Cyp2e1/Gsta4/Gstt2/Aox2/Fmo2/Gsta6/Fmo1/Adh7/Aox1/Gsta1/Aldh3a1/Adh1c/Adh6
rno00980	Metabolism of xenobiotics by cytochrome P450	46	-0.629137	-1.82215	0.000350669	0.00220988	0.00150436	4191	tags=54%, list=24%, signal=41%	309147/289197/171341/24423/498340/24861/297029/688800/54246/295037/25260/24426/25086/300850/29487/501110/25426/171178/24421/25375/26760/25116/24296/24172/310903	Aldh3b1/Mgst3/Mgst1/Gstm1/Mgst3l1/Ugt1a1/Gstk1/Aldh3b2/Cyp2f4/Mgst2/Gstt1/Gstp1/Cyp2e1/Gsta4/Gstt2/Gsta6/Cyp1b1/Adh7/Gsta1/Aldh3a1/Akr7a3/Hsd11b1/Cyp1a1/Adh1c/Adh6
rno04650	Natural killer cell mediated cytotoxicity	73	-0.556954	-1.70669	0.000480294	0.00297071	0.00202229	2962	tags=37%, list=17%, signal=31%	305450/288264/29337/25300/25385/116689/102556681/114858/24681/25023/366508/25464/308995/294251/64625/81511/25156/313050/366957/679845/309684/295378/116591/25155/24835/116630/301348	Sh3bp2/Ifnar1/Plcg2/Cd247/Faslg/Ptpn6/Sh2d1b2/Shc3/Prkcg/Prkcb/Pik3cd/Icam1/Itgal/Ncr3/Bid/Lat/Vav1/Lck/Rac2/Shc4/Itgb2/Vav3/Fcgr2a/Syk/Tnf/Csf2/Zap70
rno05135	Yersinia infection	130	-0.491481	-1.60596	0.00049945	0.00303302	0.00206471	2389	tags=21%, list=14%, signal=18%	24516/282817/361882/363328/366508/25272/24930/117542/309419/317371/81511/25156/313050/366957/25166/24498/499537/315139/25493/29513/295378/25325/498276/24835/24770/301348/24494	Jun/Pycard/Arhgef28/Ticam1/Pik3cd/Mapk10/Cd8a/Baiap2/Pip5k1b/Was/Lat/Vav1/Lck/Rac2/Casp1/Il6/Fyb1/Tab1/Nfkbia/Mapk13/Vav3/Il10/Fcgr2al1/Tnf/Ccl2/Zap70/Il1b
rno04082	Neuroactive ligand signaling	144	-0.482051	-1.58529	0.000516444	0.00308022	0.00209684	2761	tags=34%, list=16%, signal=29%	24922/29595/63843/65191/83511/64532/83817/24681/24417/25023/24408/50592/316290/29241/24174/29597/50664/29695/24947/60590/29316/25590/85268/117264/25432/64199/25553/25635/25007/116638/29290/80850/24414/50676/29191/29482/282829/24409/29412/25369/25041/24807/24316/79247/25550/84012/24925/24411/64354	Gabrb3/Htr2a/P2ry4/Gabre/Slc6a2/Adcy5/Ache/Prkcg/Grm4/Prkcb/Grin1/Gria1/Ogfrl1/Adcy8/Adra2b/P2ry2/Gnao1/Gabrr2/Gabra3/Grm8/Adora2b/Chrna4/Hrh3/P2ry6/Drd4/Gng11/Slc6a4/Mc4r/Tacr2/Slc17a7/Adora1/Gng2/Grm1/Slc6a12/Tac3/Slc1a2/Tac4/Grin2a/Adra1a/Adora2a/P2rx6/Tacr1/Drd1/Htr5b/Slc1a1/Slc1a6/Adrb1/Grin2c/Htr6
rno04820	Cytoskeleton in muscle cells	222	0.296059	1.37681	0.000563431	0.00330151	0.00224748	1222	tags=18%, list=7%, signal=17%	24583/691644/296369/287408/27064/25365/304816/29437/445442/307562/364786/310782/114108/296313/114517/291245/290561/24582/311061/299940/24837/290396/24851/63839/295929/29556/29557/81822/100360457/305679/116685/291605/500450/79433/311144/25713/689008/29275/54133/499723	Myh3/Myh2/Tnnc2/Myh1/Ankrd1/Actg2/Lmod1/Acta1/Thbs1/Dsg2/Itga8/Mybphl/Pdlim3/Myl9/Itga6/Actn2/Tnnc1/Myh11/Itgb6/Sntb1/Tnnt2/Diaph3/Tpm1/Fhl2/Mybpc3/Myh6/Myh7/Actb/Fmn2/Vcl/Lmnb1/Myot/Tpm2/Myh10/Itga4/Itgb7/Fbn2/Actc1/Pdlim1/Col24a1
rno03082	ATP-dependent chromatin remodeling	103	0.378494	1.63778	0.000654041	0.00376637	0.00256393	5117	tags=47%, list=29%, signal=33%	24828/310511/81822/290669/58940/361844/291737/500987/84576/50545/84577/300222/361925/298098/299810/287876/360804/680615/303241/314126/83712/301020/171379/65137/282546/499105/310661/361374/362834/362594/306254/308067/311713/297893/368002/362258/361724/313048/312154/685179/368001/291691/117535/297867/304569/360853/317575/362132	H2ac1/Rbbp4l1/Actb/Gatad2a/H2az1/Macroh2a2/Ino80c/H2ax/Hdac1l/Dpf1/Hdac2/Mcrs1/Actl6a/Pole3/Yeats4/Actg1/Cdk2ap1/H2ac4/Chd3/Baz1a/Rbbp7/Smarcc1/Smarca4/Ruvbl1/Arid1b/Epc2l1/Vps72/Brd7/Mbd3/Meaf6/Pbrm1/Brd9/Mrgbp/Hdac1/Baz1b/Actr5/Mta2/Rbbp4/Ing3/Smarcc2/Bcl7b/Brd8/Chd4/Arid1a/Ep400/Uchl5/Smarca1/Epc2
rno04216	Ferroptosis	45	-0.616033	-1.77686	0.000894304	0.00502243	0.00341899	2363	tags=38%, list=14%, signal=33%	25283/81639/24686/24268/500804/306009/499244/302642/100362384/100359668/29292/120102993/501644/117243/170824/25319/24451	Gclc/Alox15/Prnp/Cp/Ftl1l5/Slc39a14/Ftl1l7/Sat1/LOC100362384/Ftl1l2/Ftl1/LOC120102993/Ftl1l1/Acsl6/Steap3/Fth1/Hmox1
rno05144	Malaria	44	-0.609876	-1.75862	0.000902232	0.00502243	0.00341899	2155	tags=36%, list=12%, signal=32%	25304/25464/308995/690020/29583/29220/25544/309684/24498/25325/310553/24835/171369/25610/24770/24494	Comp/Icam1/Itgal/Klra4/Pecam1/Thbs4/Sele/Itgb2/Il6/Il10/Tlr2/Tnf/Cd40/Csf3/Ccl2/Il1b
rno01230	Biosynthesis of amino acids	72	-0.545475	-1.67092	0.00107083	0.00586324	0.00399136	1657	tags=28%, list=10%, signal=25%	29221/314140/100362738/24383/24333/500959/24189/24642/24849/498731/25630/25741/24651/60416/24334/24190/24644/499525/24191/25698	Arg1/Prps1l3/Pkml1/Gapdh/Eno1/Tpi1l1/Aldoa/Pgam1/Tpi1/Tpi1l2/Pkm/Pfkl/Pklr/Pfkp/Eno2/Aldob/Pgk1/Pgk1l1/Aldoc/Ass1
rno04080	Neuroactive ligand-receptor interaction	254	-0.423206	-1.44952	0.0012666	0.00682328	0.00464491	3317	tags=39%, list=19%, signal=32%	24889/171131/366270/690158/690198/690230/25451/24952/171158/24418/25187/65276/297795/24613/100361465/24657/287730/24769/315074/171044/25570/113914/29235/24922/499194/29595/24180/63843/65191/295144/25329/25029/24417/24953/24408/50592/316290/24261/25340/24174/29597/25616/29695/24947/60590/60432/29316/292661/29446/114215/25590/246075/25194/85268/24875/24536/29636/117264/25432/171519/64568/29251/2563…	Cckar/Chrnb3/Edn3/Fpr2/Fpr2l2/Fpr2l3/Gabrb2/Gcg/Gpha2/Grm5/Htr2c/Nmur1/Npbwr1/Oprd1/Pate2/Prl6a1/Pyy/Sct/Slurp2/Sstr3/Trhr/Taar1/Galr3/Gabrb3/Nmb/Htr2a/Agtr1a/P2ry4/Gabre/Rxfp1/Lhb/Calcrl/Grm4/Gcgr/Grin1/Gria1/Ogfrl1/Chrnb1/Npy5r/Adra2b/P2ry2/Rln1/Gabrr2/Gabra3/Grm8/Glp2r/Adora2b/Ptgir/Ghrh/Insl3/Chrna4/Prlhr/Gnrh1/Hrh3/Vipr1/Lepr/F2rl2/P2ry6/Drd4/Calcb/Galp/F2/Mc4r/Tacr2/Cga/Adora1/Calca/Adrb3/N…
rno05230	Central carbon metabolism in cancer	65	-0.551699	-1.66107	0.00147021	0.00779445	0.00530603	2056	tags=28%, list=12%, signal=25%	366508/140635/25058/100362738/24533/29634/24642/116551/25630/25741/24385/60416/25059/24778/80878/25060/59109/24716	Pik3cd/Flt3/Hk1/Pkml1/Ldha/Ldhc/Pgam1/Pdk1/Pkm/Pfkl/Gck/Pfkp/Hk2/Slc2a1/Slc16a3/Hk3/Ntrk1/Ret
rno04610	Complement and coagulation cascades	62	-0.559655	-1.67508	0.00153005	0.00798495	0.0054357	2733	tags=39%, list=16%, signal=33%	406161/362248/24231/24617/25692/29366/295703/24237/25021/116669/24153/29636/29169/29251/312705/287527/309684/25268/60325/25245/24236/192262/81509/24232	C4b/Procr/C2/Serpine1/Plat/Serpine2/Serping1/C6/Itgam/Vwf/A2m/F2rl2/Vtn/F2/C1r/Serpinf2/Itgb2/Proc/Serpinb2/Bdkrb2/C4bpb/C1s/Bdkrb1/C3
rno00500	Starch and sucrose metabolism	26	-0.659254	-1.70594	0.00194802	0.00995075	0.00677391	1573	tags=50%, list=9%, signal=46%	289827/24701/25623/25058/24203/24645/24385/690987/292804/25059/288333/64035/25060	Ugp2/Pygm/Gys2/Hk1/Amy1/Pgm1/Gck/Gys1/Gpi/Hk2/Gbe1/Pygl/Hk3
rno00052	Galactose metabolism	29	-0.652258	-1.73058	0.00199303	0.00995075	0.00677391	1535	tags=41%, list=9%, signal=38%	313843/289827/25058/296972/24645/116463/25741/24385/60416/25059/286921/25060	Galm/Ugp2/Hk1/Akr1b10/Pgm1/Akr1b7/Pfkl/Gck/Pfkp/Hk2/Akr1b8/Hk3
rno04217	Necroptosis	129	-0.473857	-1.54743	0.00199986	0.00995075	0.00677391	2661	tags=26%, list=15%, signal=22%	25400/113894/25385/29260/282817/311341/24701/81639/24514/363328/689408/25272/500804/499244/100362384/100359668/29292/120102993/691907/501644/64625/78971/25166/362896/681314/25319/680322/364867/683206/24835/64035/24493/24494	Camk2a/Sqstm1/Faslg/Tlr4/Pycard/Pla2g4b/Pygm/Alox15/Jak2/Ticam1/H2az2l2/Mapk10/Ftl1l5/Ftl1l7/LOC100362384/Ftl1l2/Ftl1/LOC120102993/Pla2g4f/Ftl1l1/Bid/Birc3/Casp1/Stat6/Bax-ps2/Fth1/H2ac12/Ticam2/Tnfaip3/Tnf/Pygl/Il1a/Il1b
rno04814	Motor proteins	176	0.310965	1.42212	0.0020259	0.00995075	0.00677391	2344	tags=25%, list=14%, signal=22%	24583/691644/296369/287408/25365/81633/302964/29437/296313/293502/29564/294854/290561/24582/192253/24837/24851/29556/29557/305012/81822/266714/84393/313170/117550/500450/79433/29275/117557/24852/309523/361308/362186/25132/360849/353302/315740/685867/171304/25745/362044/171529/501831/366069	Myh3/Myh2/Tnnc2/Myh1/Actg2/Acta2/Bicdl2/Acta1/Myl9/Kif22/Dync1i1/Dnah5/Tnnc1/Myh11/Myo16/Tnnt2/Tpm1/Myh6/Myh7/Kif26b/Actb/Myo7a/Kif4a/Kif24/Kif5b/Tpm2/Myh10/Actc1/Tpm3/Tpm4/Kif20b/Kif20a/Kif18a/Myo5b/Kif14/Kif15/Kif23/Myl6/Kif11/Myh9/Cenpe/Kif2c/Myl10/Myo3b
rno03420	Nucleotide excision repair	57	0.438262	1.72342	0.00208723	0.0101034	0.00687782	5158	tags=54%, list=30%, signal=38%	304573/83503/25737/59294/308415/81513/116468/304528/288414/299112/171150/287524/298098/298012/59102/289758/364834/310071/289561/296883/100361574/361365/363633/291703/362385/361381/294693/293144/84593/361181/64470	Pole/Polr2f/Pcna/Pold1/Ercc2/Lig1/Rfc2/Rfc5/Rfc3/Pole2/Cdk7/Rpa1/Pole3/Rad23b/Rpa2/Pold2/Polr2d/Ercc8/Polr2b/Rpa3/Polr2k/Polr2c/Polr2a/Ercc3/Pole4/Rad23a/Gtf2h2/Pold3/Cetn2/Cul4a/Ddb1
rno05167	Kaposi sarcoma-associated herpesvirus infection	175	-0.446127	-1.48856	0.0021591	0.010302	0.00701303	4271	tags=33%, list=25%, signal=25%	314322/170851/24842/311786/100912032/64862/361400/114120/311658/116465/64044/246097/79426/364594/363984/684111/117027/56822/406194/54250/288264/29337/311647/114851/50522/24516/25734/24514/161452/363328/25679/366508/25464/24747/25272/360323/25310/64199/64625/80850/24498/681314/294228/414779/83785/25493/309603/29527/29513/414819/414791/25155/116630/414789/171551/114105/81503/24232	Fos/Map2k1/Tp53/Traf2/Rps27a/Map1lc3b/Nfatc3/Gng12/Nfatc2/Ifngr1/Casp8/Fas/Zfp36/Tlr3/Ikbke/E2f2/Ccr3/Cd86/RT1-T18/Fgf2/Ifnar1/Plcg2/Prex1/Cdkn1a/Ubc/Jun/Hck/Jak2/Lef1/Ticam1/Itpr3/Pik3cd/Icam1/RT1-M3-1/Mapk10/RT1-N2/Cyct/Gng11/Bid/Gng2/Il6/Bax-ps2/RT1-S3/RT1-CE2/Vegfa/Nfkbia/RT1-CE1/Ptgs2/Mapk13/RT1-CE16/RT1-CE11/Syk/Csf2/RT1-CE15/Cxcl3/Cxcl2/Cxcl1/C3
rno04930	Type II diabetes mellitus	41	-0.593706	-1.69139	0.0022044	0.01037	0.00705932	2447	tags=44%, list=14%, signal=38%	170538/25398/366508/25139/29717/25272/366949/25058/100362738/257648/89829/29716/25630/24385/24651/25059/24835/25060	Prkcd/Cacna1a/Pik3cd/Slc2a4/Cacna1g/Mapk10/Mafa/Hk1/Pkml1/Cacna1b/Socs3/Cacna1d/Pkm/Gck/Pklr/Hk2/Tnf/Hk3
rno03410	Base excision repair	45	0.486451	1.76817	0.00286809	0.0133047	0.00905712	2681	tags=38%, list=15%, signal=32%	108348989/304573/25737/59294/81513/304577/305957/116468/304528/288414/114521/299112/79116/298098/81528/289758/25459	Hmgb1l1/Pole/Pcna/Pold1/Lig1/Ung/Neil2/Rfc2/Rfc5/Rfc3/Tdg/Pole2/Apex1/Pole3/Ogg1/Pold2/Hmgb1
rno04010	MAPK signaling pathway	278	-0.403718	-1.38539	0.00313635	0.0143499	0.00976857	2475	tags=21%, list=14%, signal=18%	309452/25398/25444/94268/24516/25267/311341/24681/365057/25023/25453/29717/29496/25730/140635/25272/296269/29467/140725/63995/25663/100360982/171109/170668/24827/25387/114513/257648/691907/29716/116667/170583/59325/25466/78965/24596/366957/25054/293847/24472/140729/56827/83785/315139/116596/500690/29513/192213/114862/84423/60587/29477/24835/307950/24493/59109/24494/24716	Nfkb2/Cacna1a/Fgf9/Efna1/Jun/Pdgfra/Pla2g4b/Prkcg/Map3k5/Prkcb/Gdnf/Cacna1g/Erbb3/Ntf4/Flt3/Mapk10/Angpt4/Ddit3/Cacng4/Dusp10/Il1r1/Relb/Dusp5/Rasgrp4/Tgfa/Arrb1/Rasgrf2/Cacna1b/Pla2g4f/Cacna1d/Map3k1/Fgf23/Ereg/Il1rap/Csf1/Ngfr/Rac2/Ntrk2/Dusp9/Hspa1a/Cacng8/Cacna1i/Vegfa/Tab1/Map3k8/Map3k9/Mapk13/Rasgrf1/Cacna1h/Nrtn/Dusp4/Mapt/Tnf/Map3k21/Il1a/Ntrk1/Il1b/Ret
rno00030	Pentose phosphate pathway	27	-0.655278	-1.71204	0.00335128	0.015126	0.010297	1551	tags=52%, list=9%, signal=47%	65152/24362/362383/498695/64524/314140/24645/298655/24189/25741/292804/60416/24190/24191	Pfkm/Fbp1/Rpia/Idnk/Tkt/Prps1l3/Pgm1/H6pd/Aldoa/Pfkl/Gpi/Pfkp/Aldob/Aldoc
rno00350	Tyrosine metabolism	32	-0.627648	-1.69978	0.00342564	0.0152555	0.0103851	3347	tags=53%, list=19%, signal=43%	309147/316424/360719/287305/688800/29383/24267/24311/316421/81683/171178/54349/25085/366675/25375/24172/310903	Aldh3b1/Aox4/Hgd/4930438A08Rikl/Aldh3b2/Fah/Comt/Ddc/Aox2/Mif/Adh7/Aox1/Th/Mifl3/Aldh3a1/Adh1c/Adh6
rno03460	Fanconi anemia pathway	47	0.464324	1.71383	0.00369199	0.0162253	0.0110453	5037	tags=51%, list=29%, signal=36%	497856/361435/360588/287634/499870/685055/497672/497976/313387/501552/287524/59102/360847/296883/312641/293678/309256/81685/293452/100360594/302982/363164/308755/316344	Rmi2/Fanca/Brip1/Eme1/Rad51/Atr/Brca1/Rad51c/Usp1/Fancb/Rpa1/Rpa2/Ube2t/Rpa3/Fancd2/Mus81/Fan1/Mlh1/Palb2/Fanci/Eme2/Wdr48/Blm/Rev1
rno03015	mRNA surveillance pathway	92	0.360805	1.54368	0.00382768	0.0166032	0.0113025	4284	tags=37%, list=25%, signal=28%	60660/314915/501526/690303/317385/298385/682033/298075/683927/299256/690585/24420/307503/688288/308653/296351/688518/311166/362178/366790/681012/298648/100362453/24672/366952/686295/368070/298681/315352/305586/309179/296219/295284/309338	Ppp2r2b/Smg5l1/Fusl1/Magohb/Fus/Magoh/Ppp2r3b/Ncbp1/Cstf2/Cpsf2/Alyref/Gspt1/Etf1/Eif4a3/Nxf2/Pabpc1l/Pabpc5/Clp1/Cstf3/Pym1/Smg5/Tardbp/Ppp2cal1/Ppp2ca/Cpsf1/Wdr82/Pnn/Ssu72/Nxt2/Papolg/Ppp2r5b/Nxt1/Rbm8a/Cstf2t
rno04625	C-type lectin receptor signaling pathway	93	-0.493462	-1.55929	0.00407094	0.017432	0.0118667	2475	tags=26%, list=14%, signal=22%	309452/170538/24516/282817/25679/366508/24508/25272/25148/450223/100360982/314856/114090/25166/24498/64546/25493/29527/29513/25325/25155/680611/24835/24494	Nfkb2/Prkcd/Jun/Pycard/Itpr3/Pik3cd/Irf1/Mapk10/Egr3/Clec4e/Relb/Mdm2/Egr2/Casp1/Il6/Il12b/Nfkbia/Ptgs2/Mapk13/Il10/Syk/Bcl3/Tnf/Il1b
rno04081	Hormone signaling	168	-0.434992	-1.44761	0.00498073	0.0210578	0.0143349	3739	tags=36%, list=22%, signal=29%	24918/25523/84021/56813/25040/24890/25516/24889/24952/84604/25105/24613/24657/84511/171044/25570/24598/309242/29302/24180/25329/64532/259248/81811/24953/24514/24695/366508/29241/24174/24603/303634/50664/29530/29446/246075/25194/56820/59326/24875/24536/25432/171519/64199/25635/116700/80850/24241/25645/25656/24335/29412/25711/25593/24316/500946/64680/24925/24336/25024/54305	Stat5a/Prkg2/Irs3/Pth1r/Gip/Esr1/Pnoc/Cckar/Gcg/Hamp/Nppb/Oprd1/Prl6a1/Slco1c1/Sstr3/Trhr/Nos1/Gna14/Itgb3/Agtr1a/Lhb/Adcy5/Slc16a2/Thpol1/Gcgr/Jak2/Pthlh/Pik3cd/Adcy8/Adra2b/Npr1/Gna13/Gnao1/Amhr2/Ghrh/Prlhr/Gnrh1/Ramp3/Rapgef3/Vipr1/Lepr/Drd4/Calcb/Gng11/Mc4r/Cga/Gng2/Calca/Adrb3/Guca2a/Epo/Adra1a/Gucy2c/Hcrtr1/Drd1/Hephl1/Crhr2/Adrb1/Epor/Gipr/Sstr2
rno05200	Pathways in cancer	484	-0.368098	-1.28387	0.00586082	0.0244689	0.0166571	2975	tags=22%, list=17%, signal=19%	54250/58819/288264/25084/303285/25112/295037/29337/282582/114851/81819/24180/25400/25385/25260/309452/25444/24516/89830/64532/24426/25267/64547/100362121/24681/24874/24514/252963/81679/161452/25023/687813/366508/363265/300850/140584/293649/29241/29452/29487/84010/116546/303634/140635/25272/317366/311862/24881/25310/170668/24827/24314/114103/300339/317673/24499/25647/501110/83571/314856/60628/2574…	Fgf2/Txnrd1/Ifnar1/Il4r/Traf4/Gadd45a/Mgst2/Plcg2/Wnt5b/Cdkn1a/Pax8/Agtr1a/Camk2a/Faslg/Gstt1/Nfkb2/Fgf9/Jun/Ptch1/Adcy5/Gstp1/Pdgfra/Bcl2l11/Ddb2/Prkcg/Vhl/Jak2/Il13ra1/Jup/Lef1/Prkcb/Traf1/Pik3cd/Col4a3/Gsta4/Wnt11/Lrp5/Adcy8/Epas1/Gstt2/Dll1/Ralb/Gna13/Flt3/Mapk10/Pim2/Lamc3/Wnt1/Cyct/Rasgrp4/Tgfa/Nqo1/Il5ra/Mmp1/Bbc3/Il6r/Il7/Gsta6/Cdkn1b/Mdm2/Cxcr4/Il2rb/Csf3r/Gng11/F2/Bid/Fgf23/Lama2/Wnt6/C…
rno00970	Aminoacyl-tRNA biosynthesis	41	0.47224	1.67627	0.00655279	0.0270202	0.0183938	4936	tags=51%, list=28%, signal=37%	309911/301544/294810/314442/360821/313047/306804/288917/297113/289352/307492/287191/291624/292759/313429/292023/291556/299851/361184/293638/301254	Qrsl1/Farsb/Tars1/Wars1/Gatc/Yars1/Iars1/Farsa/Gars1/Eprs1/Hars1/Rars1/Lars1/Sars2/Pars2/Aars1/Nars1/Mars1/Cars2/Cars1/Aars2
rno05143	African trypanosomiasis	30	-0.615512	-1.63425	0.00711452	0.0289786	0.019727	3606	tags=43%, list=21%, signal=34%	246097/301059/681319/25385/24681/25023/25464/25544/24498/64546/25325/24835/24494	Fas/Myd88/Ido2/Faslg/Prkcg/Prkcb/Icam1/Sele/Il6/Il12b/Il10/Tnf/Il1b
rno04380	Osteoclast differentiation	118	-0.465364	-1.51131	0.00762102	0.0306677	0.0208769	2953	tags=27%, list=17%, signal=23%	288264/29337/29302/113894/309452/24516/25050/25679/366508/367901/25528/683463/25272/25446/25663/100360982/89829/78965/313050/364018/315139/25493/25445/289211/29513/25732/116591/498276/25155/24835/24493/24494	Ifnar1/Plcg2/Itgb3/Sqstm1/Nfkb2/Jun/Camk4/Itpr3/Pik3cd/Btk/Sirpa/Pirb/Mapk10/Fosl2/Il1r1/Relb/Socs3/Csf1/Lck/Ncf2/Tab1/Nfkbia/Fosl1/Fcgr2b/Mapk13/Acp5/Fcgr2a/Fcgr2al1/Syk/Tnf/Il1a/Il1b
rno04022	cGMP-PKG signaling pathway	150	0.303839	1.36185	0.00784844	0.0312069	0.0212439	1773	tags=21%, list=10%, signal=19%	29747/308899/497757/497932/25202/29749/296313/29715/310616/288057/116601/54286/29556/689108/29557/171115/501099/24239/29413/24326/294961/81638/406169/84583/25262/66016/25472/24185/25031/25176/29693/25467	Kcnmb1/Irag1/Gucy1a1/Pik3r6/Gucy1b1/Ppp3r2/Myl9/Slc8a1/Creb3l4/Mylk/Atp2a1/Prkg1/Myh6/Slc25a31/Myh7/Pde5a/Srf/Cacna1c/Adra1d/Ednra/Kcnmb2/Agtr1b/Atf6b/Rgs2/Itpr1/Kcnmb4/Kcnj8/Akt1/Plcb4/Slc25a5/Atp2a2/Irs1
rno04722	Neurotrophin signaling pathway	115	-0.448842	-1.45542	0.00804167	0.031599	0.0215108	2661	tags=24%, list=15%, signal=21%	25400/25385/170820/170538/24516/114858/365057/25050/81751/366508/60450/25730/25272/360500/114203/58838/314870/316241/294515/116667/24596/679845/25054/681314/25493/362456/29513/59109	Camk2a/Faslg/Prdm4/Prkcd/Jun/Shc3/Map3k5/Camk4/Psen2/Pik3cd/Matk/Ntf4/Mapk10/Arhgdig/Sh2b2/Sh2b3/Irak3/Nfkbie/Foxo3/Map3k1/Ngfr/Shc4/Ntrk2/Bax-ps2/Nfkbia/Arhgdib/Mapk13/Ntrk1
rno00620	Pyruvate metabolism	42	-0.555316	-1.58299	0.00841891	0.0326967	0.0222581	1354	tags=21%, list=8%, signal=20%	116719/100362738/24533/29634/25630/24651/171178/24172/310903	Acacb/Pkml1/Ldha/Ldhc/Pkm/Pklr/Adh7/Adh1c/Adh6
rno05162	Measles	115	-0.445793	-1.44553	0.00934037	0.0356834	0.0242913	1769	tags=29%, list=10%, signal=26%	64044/24918/246097/363984/301059/286918/25704/498286/288264/25385/29260/24516/366508/25272/192281/246268/25310/317673/83571/25746/64625/24498/24472/681314/25660/64546/25493/140924/289211/683206/310553/24493/24494	Casp8/Stat5a/Fas/Ikbke/Myd88/Mx2/Il2ra/Slamf1/Ifnar1/Faslg/Tlr4/Jun/Pik3cd/Mapk10/Oas1a/Oas1b/Cyct/Bbc3/Cdkn1b/Il2rb/Bid/Il6/Hspa1a/Bax-ps2/Cd28/Il12b/Nfkbia/Il2rg/Fcgr2b/Tnfaip3/Tlr2/Il1a/Il1b
rno04660	T cell receptor signaling pathway	109	-0.458683	-1.47597	0.00940162	0.0356834	0.0242913	2056	tags=18%, list=12%, signal=16%	366508/117256/25272/24930/316241/81511/296078/25156/313050/366962/25660/116596/25493/29513/295378/25325/24699/24835/116630/301348	Pik3cd/Ppp2r2c/Mapk10/Cd8a/Nfkbie/Lat/Pak6/Vav1/Lck/Grap2/Cd28/Map3k8/Nfkbia/Mapk13/Vav3/Il10/Ptprc/Tnf/Csf2/Zap70
rno04382	Cornified envelope formation	138	-0.43964	-1.44196	0.00990409	0.0371682	0.025302	3294	tags=34%, list=19%, signal=28%	155268/304125/407757/407759/102552651/102550699/366189/304073/310626/366992/65030/304388/295211/301012/290789/83626/81679/680489/363265/117256/299566/366991/300250/120093743/683313/302934/287424/25724/287700/304822/406227/60335/259235/287098/291752/691932/306871/102550416/305078/303687/29301/29520/120100585/294853/29511/65129/499174	Cldn16/Cldn17/Krt76/Krt83/Sprr2b/Sprr2d/Tgm3/Cldn14/Tmem79/Krt90/Ephx2/Cldn15/S100a5/Col7a1/Cldn23/Ugcg/Jup/Cldn34e/Col4a3/Ppp2r2c/Cyp4f39/Krt82/Krt1/Krt6a/Krt6c/Ppl/Aloxe3/Itgb4/Krt15/Pkp1/Krt72/Tgm1/Sdr9c7/Cldn6/Dsg3/Tgm5/Dsp/Sprr2f/Lamb3/Evpl/Hal/Padi3/Sprr2l1/Krt18/Padi2/Cldn1/Cers3
rno03020	RNA polymerase	30	0.524086	1.72505	0.0104112	0.0386372	0.026302	4585	tags=57%, list=26%, signal=42%	83581/83582/83503/306012/366277/362728/361640/364834/680493/362858/289561/100361574/361365/313245/363633/361102/301246	Polr1a/Polr1b/Polr2f/Polr3d/Polr3k/Polr1f/Polr3e/Polr2d/Polr1g/Polr3b/Polr2b/Polr2k/Polr2c/Polr1e/Polr2a/Polr3a/Polr1c
rno04024	cAMP signaling pathway	190	-0.406374	-1.36445	0.0106751	0.0391813	0.0266724	2714	tags=23%, list=16%, signal=19%	29248/24213/63885/25400/24516/25329/89830/64532/360718/361314/25050/24214/24408/50592/84396/366508/29241/24603/25272/59326/59266/290646/29716/116700/29290/85257/25156/366957/29639/25493/24409/360616/295378/25369/24316/24167/64680/24925/24411/25024/54305/64354/353250	Tnni3/Atp1a3/Pde10a/Camk2a/Jun/Lhb/Ptch1/Adcy5/Popdc2/Arap3/Camk4/Atp1b2/Grin1/Gria1/Atp1b4/Pik3cd/Adcy8/Npr1/Mapk10/Rapgef3/Hcn4/Pde4c/Cacna1d/Cga/Adora1/Cnga3/Vav1/Rac2/Fxyd2/Nfkbia/Grin2a/Ppp1r1b/Vav3/Adora2a/Drd1/Adcyap1r1/Crhr2/Adrb1/Grin2c/Gipr/Sstr2/Htr6/Hcar2
rno04664	Fc epsilon RI signaling pathway	58	-0.524649	-1.5612	0.0113502	0.0412061	0.0280508	2323	tags=26%, list=13%, signal=22%	311341/366508/367901/25272/54259/691907/25290/81511/25156/366957/29513/295378/25155/24835/116630	Pla2g4b/Pik3cd/Btk/Mapk10/Inpp5d/Pla2g4f/Alox5/Lat/Vav1/Rac2/Mapk13/Vav3/Syk/Tnf/Csf2
rno04973	Carbohydrate digestion and absorption	38	-0.553815	-1.55567	0.0121228	0.0435376	0.029638	2196	tags=34%, list=13%, signal=30%	24214/25023/84396/366508/25058/365549/24203/25552/29716/29639/25059/65197/25060	Atp1b2/Prkcb/Atp1b4/Pik3cd/Hk1/Slc5a1l1/Amy1/Slc5a1/Cacna1d/Fxyd2/Hk2/Slc2a5/Hk3
rno04744	Phototransduction	21	-0.647022	-1.60254	0.0131217	0.0466239	0.0317389	2013	tags=33%, list=12%, signal=30%	316218/365901/113911/140936/301233/81760/29481	Guca1b/Gnat2/Gucy2e/Rcvrn/Guca1a/Grk1/Rgs9
rno05216	Thyroid cancer	37	-0.571774	-1.58028	0.0139595	0.0490788	0.0334101	2917	tags=24%, list=17%, signal=20%	25112/114851/81819/100362121/161452/83502/681314/59109/24716	Gadd45a/Cdkn1a/Pax8/Ddb2/Lef1/Cdh1/Bax-ps2/Ntrk1/Ret
rno00140	Steroid hormone biosynthesis	37	-0.568924	-1.5724	0.0147297	0.0512471	0.0348861	2596	tags=43%, list=15%, signal=37%	24267/117182/25429/171352/25086/25322/25053/24300/361802/25426/171522/25147/361267/292915/25116/24296	Comt/Hsd17b3/Cyp7b1/Cyp3a9/Cyp2e1/Hsd17b1/Cyp2d2/Cyp2b1/Hsd17b8/Cyp1b1/Cyp2d4/Cyp19a1/Akr1c15/Sult2b1/Hsd11b1/Cyp1a1
rno01250	Biosynthesis of nucleotide sugars	37	-0.56859	-1.57148	0.0149222	0.0513817	0.0349778	1939	tags=30%, list=11%, signal=26%	296560/289827/83472/25058/252899/24645/24385/292804/25059/361245/25060	Uap1l1/Ugp2/Ugdh/Hk1/Miox/Pgm1/Gck/Gpi/Hk2/Cmah/Hk3
rno04913	Ovarian steroidogenesis	44	-0.541432	-1.56125	0.0150888	0.051425	0.0350072	2651	tags=39%, list=15%, signal=33%	681337/25329/64532/311341/25322/25644/29241/691907/25426/25290/50559/116700/503049/29527/25147/361267/24296	Acot4/Lhb/Adcy5/Pla2g4b/Hsd17b1/Bmp6/Adcy8/Pla2g4f/Cyp1b1/Alox5/Acot1/Cga/Acot5/Ptgs2/Cyp19a1/Akr1c15/Cyp1a1
rno04666	Fc gamma R-mediated phagocytosis	92	-0.456572	-1.44239	0.0167823	0.0565568	0.0385007	2493	tags=24%, list=14%, signal=21%	362719/170538/25734/311341/24681/25023/366508/54259/309419/317371/246115/691907/81511/25156/366957/298975/289211/295378/116591/498276/24699/25155	Asap2/Prkcd/Hck/Pla2g4b/Prkcg/Prkcb/Pik3cd/Inpp5d/Pip5k1b/Was/Plpp2/Pla2g4f/Lat/Vav1/Rac2/Scin/Fcgr2b/Vav3/Fcgr2a/Fcgr2al1/Ptprc/Syk
rno03440	Homologous recombination	41	0.436917	1.55088	0.0169332	0.0565568	0.0385007	5360	tags=63%, list=31%, signal=44%	360588/287634/499870/497672/298429/59294/497976/313063/64557/287524/315969/300711/59102/289758/291787/296883/64046/293678/499966/293452/290631/308755/54304/293144/362704/500679	Brip1/Eme1/Rad51/Brca1/Rad54l/Pold1/Rad51c/Rad54b/Bard1/Rpa1/Topbp1/Atm/Rpa2/Pold2/Rbbp8/Rpa3/Mre11/Mus81/Xrcc2/Palb2/Babam1/Blm/Ssbp1/Pold3/Babam2/Rad51b
rno04933	AGE-RAGE signaling pathway in diabetic complications	98	-0.460671	-1.46315	0.018434	0.0609601	0.0414982	2447	tags=21%, list=14%, signal=19%	170538/24516/24617/24514/25023/366508/363265/25464/25272/83571/24330/25544/24498/24600/681314/83785/29513/24835/24493/24770/24494	Prkcd/Jun/Serpine1/Jak2/Prkcb/Pik3cd/Col4a3/Icam1/Mapk10/Cdkn1b/Egr1/Sele/Il6/Nos3/Bax-ps2/Vegfa/Mapk13/Tnf/Il1a/Ccl2/Il1b
rno05166	Human T-cell leukemia virus 1 infection	212	-0.398777	-1.34742	0.0190646	0.0624272	0.042497	1937	tags=18%, list=11%, signal=16%	366508/24981/29241/25464/24747/308995/25272/360323/500910/25663/100360982/24330/294273/25746/116667/294270/114090/313050/309684/24498/309621/24230/681314/294228/294269/414779/25493/309603/25445/140924/414819/24778/414791/24835/309622/116630/171369/414789	Pik3cd/RT1-Db2/Adcy8/Icam1/RT1-M3-1/Itgal/Mapk10/RT1-N2/Tnfrsf13c/Il1r1/Relb/Egr1/RT1-DMb/Il2rb/Map3k1/RT1-Db1/Egr2/Lck/Itgb2/Il6/RT1-Ba/Tspo/Bax-ps2/RT1-S3/RT1-Da/RT1-CE2/Nfkbia/RT1-CE1/Fosl1/Il2rg/RT1-CE16/Slc2a1/RT1-CE11/Tnf/RT1-Bb/Csf2/Cd40/RT1-CE15
rno00220	Arginine biosynthesis	20	-0.627056	-1.52954	0.0200919	0.0651523	0.044352	3677	tags=40%, list=21%, signal=32%	192268/307759/24598/303563/29221/24600/25698/24599	Gls2/Gpt2/Nos1/Nags/Arg1/Nos3/Ass1/Nos2
rno04020	Calcium signaling pathway	227	-0.390734	-1.32687	0.0256674	0.0824317	0.0561149	2446	tags=27%, list=14%, signal=23%	25570/24598/54250/83529/29691/29337/309242/29595/24180/25400/25398/25444/117558/25267/24681/25050/25023/24408/25679/25453/29717/291926/29241/29496/29316/24566/691807/24827/114207/312981/257648/60628/29716/170583/25007/25645/25054/24414/24600/81677/497197/56827/83785/24409/25245/29412/25369/25041/24807/24316/79247/81509/114862/308022/24925/24411/171358/64354/59109/24716/24599	Trhr/Nos1/Fgf2/Vdac1/Pde1b/Plcg2/Gna14/Htr2a/Agtr1a/Camk2a/Cacna1a/Fgf9/Mylk2/Pdgfra/Prkcg/Camk4/Prkcb/Grin1/Itpr3/Gdnf/Cacna1g/Mylk3/Adcy8/Erbb3/Adora2b/Mst1/C2h4orf3/Tgfa/Ryr1/Asph/Cacna1b/Cxcr4/Cacna1d/Fgf23/Tacr2/Adrb3/Ntrk2/Grm1/Nos3/Itpka/Plcz1/Cacna1i/Vegfa/Grin2a/Bdkrb2/Adra1a/Adora2a/P2rx6/Tacr1/Drd1/Htr5b/Bdkrb1/Cacna1h/Mcoln3/Adrb1/Grin2c/Camk1g/Htr6/Ntrk1/Ret/Nos2
rno00860	Porphyrin metabolism	35	-0.546	-1.50957	0.0269706	0.085792	0.0584024	1912	tags=31%, list=11%, signal=28%	24268/500804/499244/100362384/100359668/29292/120102993/501644/25319/24451/500946	Cp/Ftl1l5/Ftl1l7/LOC100362384/Ftl1l2/Ftl1/LOC120102993/Ftl1l1/Fth1/Hmox1/Hephl1
rno00020	Citrate cycle (TCA cycle)	28	0.474543	1.52237	0.0297426	0.0937172	0.0637974	4387	tags=54%, list=25%, signal=40%	361042/81829/289950/362404/50655/361596/299201/81654/360975/114096/289217/79250/24551/298942/361071	Pck2/Mdh2/Pdhb/Suclg2/Aco1/Idh2/Dlst/Dlat/Ogdh/Idh3a/Sdhc/Aco2/Mdh1/Dld/Sucla2
rno05410	Hypertrophic cardiomyopathy	92	0.318193	1.36137	0.0304332	0.0949971	0.0646687	2789	tags=39%, list=16%, signal=33%	301518/364786/29715/114517/78975/290561/311061/299940/24837/116601/24851/295929/29556/29557/81822/24239/500450/311144/25713/29275/117557/116600/29161/24852/315744/29693/24323/24482/114493/25717/25437/689560/140447/287876/305941/316758	Prkag3/Itga8/Slc8a1/Itga6/Prkaa2/Tnnc1/Itgb6/Sntb1/Tnnt2/Atp2a1/Tpm1/Mybpc3/Myh6/Myh7/Actb/Cacna1c/Tpm2/Itga4/Itgb7/Actc1/Tpm3/Cacnb2/Cav3/Tpm4/Itga11/Atp2a2/Edn1/Igf1/Cacna1f/Tgfb3/Emd/Ryr2/Slc8a2/Actg1/Sgcg/Lama1
rno03430	Mismatch repair	22	0.517391	1.57895	0.031861	0.0985332	0.0670759	3200	tags=50%, list=18%, signal=41%	305000/25737/59294/81513/116468/304528/288414/287524/59102/289758/296883	Exo1/Pcna/Pold1/Lig1/Rfc2/Rfc5/Rfc3/Rpa1/Rpa2/Pold2/Rpa3
rno04622	RIG-I-like receptor signaling pathway	54	-0.494644	-1.46481	0.0350665	0.107451	0.0731469	1867	tags=50%, list=11%, signal=45%	361321/361296/81736/297989/315599/303538/309165/299827/311245/293624/84351/499801/311786/64044/363984/364073/266764/498840/494338/25272/116667/287824/64546/25493/29513/24835/245920	Atg12/Rnf125/Nfkb1/Rig1/Nlrx1/Dhx58/Rela/Tbk1/Traf6/Irf7/Ikbkb/Ifih1/Traf2/Casp8/Ikbke/Ddx3/Tbkbp1/Sting1/Trim25/Mapk10/Map3k1/Trim80/Il12b/Nfkbia/Mapk13/Tnf/Cxcl10
rno00330	Arginine and proline metabolism	47	-0.508297	-1.47564	0.0354957	0.107778	0.0733691	1852	tags=23%, list=11%, signal=21%	366473/29221/680409/114027/64475/302642/24600/360526/308652/29593/24599	Azin2/Arg1/Prodh/Dao/P4ha1/Sat1/Nos3/P4ha2/Smox/Ckmt1/Nos2
rno00790	Folate biosynthesis	27	-0.567356	-1.48233	0.0369881	0.111298	0.0757651	1329	tags=26%, list=8%, signal=24%	296972/116463/361300/25085/361267/286921/29244	Akr1b10/Akr1b7/Mocos/Th/Akr1c15/Akr1b8/Gch1
rno04932	Non-alcoholic fatty liver disease	145	-0.409946	-1.3511	0.0374332	0.111631	0.0759921	2389	tags=15%, list=14%, signal=13%	24516/25086/64547/365057/366508/25272/29467/25310/24536/24499/89829/64562/64625/24498/24651/681314/29513/84683/24835/24493/100362331/24494	Jun/Cyp2e1/Bcl2l11/Map3k5/Pik3cd/Mapk10/Ddit3/Cyct/Lepr/Il6r/Socs3/Prkab2/Bid/Il6/Pklr/Bax-ps2/Mapk13/Cox4i2/Tnf/Il1a/Ndufa4l2/Il1b
rno00601	Glycosphingolipid biosynthesis - lacto and neolacto series	23	-0.591745	-1.4995	0.0391363	0.115375	0.0785408	1419	tags=35%, list=8%, signal=32%	366064/306860/688155/296564/308586/25280/58924/290638	B3galt1/Gcnt2/B4galnt2/Fut7/Sec1/St8sia1/Fut2/B3gnt3
rno04623	Cytosolic DNA-sensing pathway	63	-0.469056	-1.40463	0.0393795	0.115375	0.0785408	1415	tags=21%, list=8%, signal=19%	353316/282817/498840/314336/120103587/25166/24498/304987/25493/116637/81780/245920/24494	Gsdme/Pycard/Sting1/Ddx41/Ddx41l1/Casp1/Il6/Aim2/Nfkbia/Ccl4/Ccl5/Cxcl10/Il1b
rno04392	Hippo signaling pathway - multiple species	27	0.462382	1.47802	0.0412185	0.119713	0.0814937	2755	tags=37%, list=16%, signal=31%	303039/683522/362423/305251/85265/361630/29431/25744/311437/316101	Wwc1/Tead4/Rassf4/Rassf6/Ajuba/Tead1/Pak1/Nf2/Rassf2/Limd1
rno04613	Neutrophil extracellular trap formation	130	-0.410484	-1.34129	0.0463862	0.13356	0.0909203	3352	tags=25%, list=19%, signal=21%	687001/690158/690198/690230/83529/29337/60586/29302/295277/29260/84580/24681/25023/689408/366508/308995/25021/116669/291157/691992/366957/297453/25166/309684/364018/680322/29513/310553/116591/498276/25155/316010/24232	Hdac9/Fpr2/Fpr2l2/Fpr2l3/Vdac1/Plcg2/Clcn4/Itgb3/H4c14/Tlr4/Hdac5/Prkcg/Prkcb/H2az2l2/Pik3cd/Itgal/Itgam/Vwf/Hist1h2bo/Gp1ba/Rac2/Hdac11/Casp1/Itgb2/Ncf2/H2ac12/Mapk13/Tlr2/Fcgr2a/Fcgr2al1/Syk/Camp/C3
rno04662	B cell receptor signaling pathway	71	-0.456499	-1.39443	0.0472895	0.134997	0.0918986	2480	tags=25%, list=14%, signal=22%	116689/24516/25023/366508/367901/683463/54259/316241/293618/313498/25156/366957/365367/25493/362046/289211/295378/25155	Ptpn6/Jun/Prkcb/Pik3cd/Btk/Pirb/Inpp5d/Nfkbie/Ifitm1/Cd72/Vav1/Rac2/Cd19/Nfkbia/Dapp1/Fcgr2b/Vav3/Syk
rno04750	Inflammatory mediator regulation of TRP channels	90	-0.434817	-1.36864	0.0497175	0.140726	0.0957982	2875	tags=29%, list=17%, signal=24%	29337/29595/25400/171384/25364/170538/64532/311341/24681/25023/25679/366508/497948/29241/29597/25272/25663/66026/286920/691907/25466/25245/29513/81509/59109/24494	Plcg2/Htr2a/Camk2a/Trpm8/Asic2/Prkcd/Adcy5/Pla2g4b/Prkcg/Prkcb/Itpr3/Pik3cd/Trpv3/Adcy8/P2ry2/Mapk10/Il1r1/Trpv4/Asic3/Pla2g4f/Il1rap/Bdkrb2/Mapk13/Bdkrb1/Ntrk1/Il1b
rno00830	Retinol metabolism	42	-0.503743	-1.43598	0.0506799	0.142244	0.0968319	3647	tags=38%, list=21%, signal=30%	313689/690953/24861/114106/24188/286964/297805/171352/316421/24300/171178/312495/54349/24296/24172/310903	Dhrs3/Rdh8/Ugt1a1/Bco1/Aldh1a1/Hsd17b6/Sdr16c5/Cyp3a9/Aox2/Cyp2b1/Adh7/Cyp26b1/Aox1/Cyp1a1/Adh1c/Adh6
rno04970	Salivary secretion	69	-0.456128	-1.38825	0.0512821	0.142735	0.097166	2366	tags=32%, list=14%, signal=28%	362881/24598/24213/64532/24681/24214/25023/84396/25679/29241/114246/691970/24203/364973/25645/83731/29639/309114/29412/65206/316010/24925	RGD1306474/Nos1/Atp1a3/Adcy5/Prkcg/Atp1b2/Prkcb/Atp1b4/Itpr3/Adcy8/Trpv6/Dmbt1l1/Amy1/Best2/Adrb3/Kcnma1/Fxyd2/Muc5b/Adra1a/Kcnn4/Camp/Adrb1
rno05030	Cocaine addiction	45	-0.49778	-1.43578	0.0527607	0.145637	0.0991415	2389	tags=24%, list=14%, signal=21%	24516/64532/24311/24408/116671/24409/25085/360616/24316/24411/29481	Jun/Adcy5/Ddc/Grin1/Cdk5r1/Grin2a/Th/Ppp1r1b/Drd1/Grin2c/Rgs9
rno04929	GnRH secretion	58	-0.467648	-1.39158	0.0537634	0.146162	0.0994986	2878	tags=34%, list=17%, signal=29%	50599/54262/25329/24681/25023/25679/366508/29717/54261/25194/116560/25387/29716/116700/25353/29713/56827/65206/54263/114862	Kcnj3/Kcnn2/Lhb/Prkcg/Prkcb/Itpr3/Pik3cd/Cacna1g/Kcnn1/Gnrh1/Kcnj9/Arrb1/Cacna1d/Cga/Spp1/Kcnj5/Cacna1i/Kcnn4/Kcnn3/Cacna1h
rno00564	Glycerophospholipid metabolism	97	-0.425116	-1.3482	0.054115	0.146162	0.0994986	3770	tags=32%, list=22%, signal=25%	362261/140866/29387/360426/691905/367745/289439/81925/29194/25062/311341/170919/83817/362866/29526/114101/286936/360843/362792/298581/296130/313977/246115/691907/313997/29354/287644/85311/305166/687071/29692	Lpin3/Dgka/Pla2g2c/Pla2g6/Pla2g4d/Dgkk/Lpcat2b/Cds1/Chka/Gpd2/Pla2g4b/Agpat4/Ache/Chpt1/Pla2g1b/Cds2/Pcyt1b/Etnk2/Pld4/Pla2g2e/Gpat2/Lpin1/Plpp2/Pla2g4f/Mboat2/Pla2g5/Phospho1/Pla1a/Gpat3/Etnppl/Pla2g2a
rno04931	Insulin resistance	101	-0.418596	-1.3391	0.0542636	0.146162	0.0994986	2505	tags=24%, list=14%, signal=20%	691447/170538/24701/25023/366508/25139/25272/83516/25623/116719/89829/295219/64562/291567/291582/24498/690987/24600/309513/25493/24778/192280/24835/64035	Ppp1r3e/Prkcd/Pygm/Prkcb/Pik3cd/Slc2a4/Mapk10/Ppargc1a/Gys2/Acacb/Socs3/Slc27a3/Prkab2/Ppargc1b/Slc27a6/Il6/Gys1/Nos3/Ppp1r3c/Nfkbia/Slc2a1/Ppp1r3b/Tnf/Pygl
rno00520	Amino sugar and nucleotide sugar metabolism	37	-0.524145	-1.44864	0.0553411	0.147871	0.100662	4987	tags=51%, list=29%, signal=37%	501167/683570/360518/296117/310935/300089/287835/498272/81759/296560/289827/83472/294673/25058/24645/24385/292804/25059/25060	Gmppa/Gnpda1/Gfpt2/Galk2/Fpgt/Pmm1/Galk1/Uap1/Renbp/Uap1l1/Ugp2/Ugdh/Hexb/Hk1/Pgm1/Gck/Gpi/Hk2/Hk3
rno04151	PI3K-Akt signaling pathway	312	-0.358939	-1.23674	0.0587639	0.155771	0.10604	2724	tags=21%, list=16%, signal=18%	114851/25412/29302/367313/25385/29260/81008/362800/25444/94268/25267/64547/24514/25304/366508/25453/363265/117256/310132/29496/25730/140635/296269/311862/25623/116669/25724/24827/24499/25647/83571/314856/24477/294515/25746/298518/29169/64199/29220/170583/309368/59325/78965/80850/24596/25353/24498/25054/170921/690987/24600/365367/24335/83785/315981/310683/140942/305078/140924/310553/25155/84423/29…	Cdkn1a/Col2a1/Itgb3/Col6a3/Faslg/Tlr4/Itga7/Itgb8/Fgf9/Efna1/Pdgfra/Bcl2l11/Jak2/Comp/Pik3cd/Gdnf/Col4a3/Ppp2r2c/Osmr/Erbb3/Ntf4/Flt3/Angpt4/Lamc3/Gys2/Vwf/Itgb4/Tgfa/Il6r/Il7/Cdkn1b/Mdm2/Ibsp/Foxo3/Il2rb/Csf3r/Vtn/Gng11/Thbs4/Fgf23/Lama2/Ereg/Csf1/Gng2/Ngfr/Spp1/Il6/Ntrk2/Itga2/Gys1/Nos3/Cd19/Epo/Vegfa/Col6a4/Itga10/Ddit4/Lamb3/Il2rg/Tlr2/Syk/Nrtn/Il7r/Epor/Csf3/Ntrk1/Ret
rno04981	Folate transport and metabolism	22	0.485169	1.48061	0.0618094	0.162554	0.110658	1889	tags=32%, list=11%, signal=28%	64300/287379/312382/24312/171049/29723/29261	Mthfd1/Shmt1/Abcg2/Dhfr/Folr1/Slc19a1/Tyms
rno03050	Proteasome	41	0.382708	1.35846	0.0628031	0.163877	0.111558	5471	tags=63%, list=32%, signal=44%	117262/81827/311078/65138/287984/29677/83806/29666/307821/365388/83499/29676/25581/29675/100360846/29669/288455/117263/29671/29670/29425/85492/292766/289924/287670/287772	Psmc4/Psmc5/Psmd14/Adrm1/Psmd2/Psmc3/Psmd1/Psmb6/Psmd7/Psmd13/Psmd4/Psmb3/Psmc2/Psmb2/Psmb6l1/Psma2/Pomp/Psmc1/Psma4/Psma3/Psmb5/Psmb7/Psmd8/Psmd6/Psmd3/Psmd12
rno05170	Human immunodeficiency virus 1 infection	192	-0.373609	-1.25712	0.0665281	0.172251	0.117259	2658	tags=20%, list=15%, signal=17%	25300/24223/25385/29260/24516/24681/25023/25679/366508/498840/24747/25272/50664/360323/100362547/25310/24811/60628/64199/64625/24812/156767/80850/296078/103691088/366957/378947/681314/294228/414779/315139/25493/309603/29513/414819/310553/414791/24835/414789	Cd247/B2m/Faslg/Tlr4/Jun/Prkcg/Prkcb/Itpr3/Pik3cd/Sting1/RT1-M3-1/Mapk10/Gnao1/RT1-N2/Ap1g2/Cyct/Tap1/Cxcr4/Gng11/Bid/Tap2/Tnfrsf1b/Gng2/Pak6/Elocl1/Rac2/Bst2/Bax-ps2/RT1-S3/RT1-CE2/Tab1/Nfkbia/RT1-CE1/Mapk13/RT1-CE16/Tlr2/RT1-CE11/Tnf/RT1-CE15
rno00565	Ether lipid metabolism	45	-0.480659	-1.38639	0.0687117	0.176536	0.120176	4124	tags=42%, list=24%, signal=32%	114113/361527/29387/360426/691905/289439/50555/311341/362866/29526/293490/362792/298581/246115/691907/29354/84050/301265/29692	Pafah1b3/Pld3/Pla2g2c/Pla2g6/Pla2g4d/Lpcat2b/Ugt8/Pla2g4b/Chpt1/Pla2g1b/Gdpd3/Pld4/Pla2g2e/Plpp2/Pla2g4f/Pla2g5/Enpp2/Pla2g7/Pla2g2a
rno04910	Insulin signaling pathway	125	-0.397714	-1.2984	0.0721983	0.183286	0.124771	2317	tags=20%, list=13%, signal=17%	691447/24701/114858/366508/25139/25521/25272/114203/83516/25623/25058/116719/24679/89829/116717/64562/679845/24385/690987/24651/309513/25059/192280/64035/25060	Ppp1r3e/Pygm/Shc3/Pik3cd/Slc2a4/Prkar1b/Mapk10/Sh2b2/Ppargc1a/Gys2/Hk1/Acacb/Prkar2b/Socs3/Trip10/Prkab2/Shc4/Gck/Gys1/Pklr/Ppp1r3c/Hk2/Ppp1r3b/Pygl/Hk3
rno01212	Fatty acid metabolism	59	0.337702	1.31869	0.0724366	0.183286	0.124771	1812	tags=19%, list=10%, signal=17%	316124/681458/171402/50671/308100/498728/680115/29470/60581/114024/25541	Acsbg3/Scd3/Elovl6/Fasn/Acat2/Elovl2/Hacd1/Mecr/Acaca/Acsl3/Scp2
rno01524	Platinum drug resistance	73	-0.435272	-1.33381	0.0736479	0.18424	0.12542	4237	tags=38%, list=24%, signal=29%	24842/289197/171341/64044/24423/246097/498340/298074/295037/24941/114851/25385/25260/25303/24426/365057/366508/300850/29487/25310/317673/501110/314856/64625/78971/681314/24421/24218	Tp53/Mgst3/Mgst1/Casp8/Gstm1/Fas/Mgst3l1/Xpa/Mgst2/Atp7a/Cdkn1a/Faslg/Gstt1/Abcc2/Gstp1/Map3k5/Pik3cd/Gsta4/Gstt2/Cyct/Bbc3/Gsta6/Mdm2/Bid/Birc3/Bax-ps2/Gsta1/Atp7b
rno05161	Hepatitis B	144	-0.386143	-1.26989	0.0740343	0.18424	0.12542	4271	tags=32%, list=25%, signal=24%	314322/170851/24842/499801/361400/311658/295052/64044/24918/314638/246097/364594/363984/301059/25631/313641/684111/288264/364073/114851/25385/29260/24516/100362121/24681/24514/83615/25023/363328/366508/25272/25148/25310/64625/116667/114090/24498/362896/681314/315139/25493/364867/29513/310553/24835/81687	Fos/Map2k1/Tp53/Ifih1/Nfatc3/Nfatc2/Ccna1/Casp8/Stat5a/Creb3l3/Fas/Tlr3/Ikbke/Myd88/Smad3/Hspg2/E2f2/Ifnar1/Ddx3/Cdkn1a/Faslg/Tlr4/Jun/Ddb2/Prkcg/Jak2/Atp6ap1/Prkcb/Ticam1/Pik3cd/Mapk10/Egr3/Cyct/Bid/Map3k1/Egr2/Il6/Stat6/Bax-ps2/Tab1/Nfkbia/Ticam2/Mapk13/Tlr2/Tnf/Mmp9
rno04721	Synaptic vesicle cycle	65	-0.445761	-1.34211	0.0744681	0.18424	0.12542	2469	tags=25%, list=14%, signal=21%	29757/83511/25398/140694/64829/25012/257648/25716/25553/116638/312488/64830/50676/29482/25550/84012	Atp6v0a1/Slc6a2/Cacna1a/Dnm1/Unc13a/Snap25/Cacna1b/Syt1/Slc6a4/Slc17a7/Atp6v1b1/Unc13b/Slc6a12/Slc1a2/Slc1a1/Slc1a6
rno04926	Relaxin signaling pathway	120	-0.397993	-1.29839	0.0753498	0.18505	0.125972	2461	tags=19%, list=14%, signal=17%	295144/24516/64532/114858/366508/363265/29241/25272/50664/25616/114215/300339/25387/64199/80850/679845/24600/83785/25493/29513/171052/81687/24599	Rxfp1/Jun/Adcy5/Shc3/Pik3cd/Col4a3/Adcy8/Mapk10/Gnao1/Rln1/Insl3/Mmp1/Arrb1/Gng11/Gng2/Shc4/Nos3/Vegfa/Nfkbia/Mapk13/Mmp13/Mmp9/Nos2
rno00260	Glycine, serine and threonine metabolism	34	0.378194	1.28882	0.0761849	0.185735	0.126438	992	tags=21%, list=6%, signal=19%	25748/304429/24962/287379/303272/58835/25750	Alas2/Psph/Cth/Shmt1/Pipox/Phgdh/Maob
rno03060	Protein export	29	0.429841	1.38745	0.0777882	0.18827	0.128164	4400	tags=38%, list=25%, signal=28%	317409/100360464/293142/288919/288518/691145/296076/290555/291963/80843/298068	Arxes1/Arxes2/Spcs2/Get3/Get4/Immp1l/Srp14/Spcs1/Tmem208/Sec61a1/Sec61b
rno04726	Serotonergic synapse	92	-0.414999	-1.31106	0.0800451	0.192339	0.130933	2878	tags=32%, list=17%, signal=26%	50599/24922/54262/29595/25398/64532/311341/81639/24681/24311/25023/25679/25053/50664/24693/116560/59326/257648/691907/25290/64199/29716/25553/80850/29713/171522/29527/79247/64354	Kcnj3/Gabrb3/Kcnn2/Htr2a/Cacna1a/Adcy5/Pla2g4b/Alox15/Prkcg/Ddc/Prkcb/Itpr3/Cyp2d2/Gnao1/Ptgs1/Kcnj9/Rapgef3/Cacna1b/Pla2g4f/Alox5/Gng11/Cacna1d/Slc6a4/Gng2/Kcnj5/Cyp2d4/Ptgs2/Htr5b/Htr6
rno04014	Ras signaling pathway	212	-0.36477	-1.23252	0.0845361	0.201679	0.137292	2412	tags=20%, list=14%, signal=17%	25444/94268/25267/311341/114858/24681/29526/25023/24408/366508/362799/25730/116546/314596/140635/296211/25272/296269/298581/170668/24827/288589/114513/691907/64199/170583/81511/78965/80850/296078/24596/366957/679845/25054/29354/85311/83785/24409/192213/29692/59109/301348	Fgf9/Efna1/Pdgfra/Pla2g4b/Shc3/Prkcg/Pla2g1b/Prkcb/Grin1/Pik3cd/Rapgef5/Ntf4/Ralb/Rasal3/Flt3/Ralgapa2/Mapk10/Angpt4/Pla2g2e/Rasgrp4/Tgfa/Rasa4/Rasgrf2/Pla2g4f/Gng11/Fgf23/Lat/Csf1/Gng2/Pak6/Ngfr/Rac2/Shc4/Ntrk2/Pla2g5/Pla1a/Vegfa/Grin2a/Rasgrf1/Pla2g2a/Ntrk1/Zap70
rno03022	Basal transcription factors	41	0.368066	1.30649	0.0892436	0.2114	0.143909	5785	tags=56%, list=33%, signal=37%	83828/308415/81674/303918/171150/682902/170844/293345/317256/309194/117526/288533/291703/291773/310784/307927/294693/83830/303433/287571/81673/502227/294018	Gtf2a2/Ercc2/Gtf2f2/Gtf2e1/Cdk7/Taf12/Taf2/Taf10/Taf1/Taf6l/Tbp/Taf6/Ercc3/Taf4b/Taf13/Taf5l1/Gtf2h2/Gtf2a1/Taf11l1/Taf15/Gtf2b/Gtf2h5/Taf5
rno05235	PD-L1 expression and PD-1 checkpoint pathway in cancer	81	-0.42021	-1.30523	0.0922551	0.216994	0.147718	2658	tags=23%, list=15%, signal=20%	25300/29260/116689/24516/24514/363328/366508/60462/316241/81511/313050/499342/25660/25493/364867/29513/310553/299206/301348	Cd247/Tlr4/Ptpn6/Jun/Jak2/Ticam1/Pik3cd/Batf3/Nfkbie/Lat/Lck/Cd274/Cd28/Nfkbia/Ticam2/Mapk13/Tlr2/Batf/Zap70
rno05202	Transcriptional misregulation in cancer	163	-0.375448	-1.24572	0.0933192	0.217962	0.148376	2917	tags=21%, list=17%, signal=18%	25112/303836/114851/81819/303828/24484/114510/100362121/81679/687813/25692/140635/29467/25021/24253/362176/83571/314856/362733/25746/304785/24596/78971/24498/106146145/360635/58853/681314/171045/25587/304005/116630/171369/81687/59109	Gadd45a/Bcl6/Cdkn1a/Pax8/Etv5/Igfbp3/Mllt3/Ddb2/Jup/Traf1/Plat/Flt3/Ddit3/Itgam/Cebpb/Lmo2/Cdkn1b/Mdm2/Etv1/Il2rb/Slc45a3/Ngfr/Birc3/Il6/Baiap3/Etv4/Nr4a3/Bax-ps2/Mmp3/Id2/Nfkbiz/Csf2/Cd40/Mmp9/Ntrk1
rno04724	Glutamatergic synapse	103	-0.396357	-1.2663	0.102109	0.236836	0.161224	2446	tags=23%, list=14%, signal=20%	25398/64532/311341/24681/24417/25023/24408/50592/25679/29241/50664/60590/252919/691907/64199/29716/116638/80850/24414/29482/24409/25550/84012/24411	Cacna1a/Adcy5/Pla2g4b/Prkcg/Grm4/Prkcb/Grin1/Gria1/Itpr3/Adcy8/Gnao1/Grm8/Slc38a3/Pla2g4f/Gng11/Cacna1d/Slc17a7/Gng2/Grm1/Slc1a2/Grin2a/Slc1a1/Slc1a6/Grin2c
rno01522	Endocrine resistance	91	-0.408045	-1.28632	0.103604	0.238646	0.162456	4299	tags=31%, list=25%, signal=23%	85385/24790/314322/170851/24842/25433/83569/24890/684111/314612/81686/114851/24516/64532/114858/366508/29241/84010/25272/83571/314856/679845/681314/406162/29513/114496/29147/81687	Shc1/Sp1/Fos/Map2k1/Tp53/Hbegf/Abcb11/Esr1/E2f2/Shc2/Mmp2/Cdkn1a/Jun/Adcy5/Shc3/Pik3cd/Adcy8/Dll1/Mapk10/Cdkn1b/Mdm2/Shc4/Bax-ps2/Notch4/Mapk13/Bik/Jag2/Mmp9
rno05211	Renal cell carcinoma	68	-0.428479	-1.29801	0.10551	0.241372	0.164313	2724	tags=19%, list=16%, signal=16%	114851/303185/24516/24874/366508/29452/24827/296078/103691088/83785/308913/24778/54702	Cdkn1a/Flcn/Jun/Vhl/Pik3cd/Epas1/Tgfa/Pak6/Elocl1/Vegfa/Egln1/Slc2a1/Egln3
rno04512	ECM-receptor interaction	83	-0.411871	-1.28299	0.108844	0.247304	0.168351	4329	tags=42%, list=25%, signal=32%	315346/25661/117556/307582/363458/29364/25592/685269/313641/79110/29184/25412/29302/25406/367313/81008/362800/25304/363265/311862/116669/25724/691992/24477/29169/29220/309368/502858/25353/170921/24771/25312/315981/310683/305078	Itga5/Fn1/Sv2b/Lama3/Col4a6/Cd47/Agrn/Itga2b/Hspg2/Mepe/Cd36/Col2a1/Itgb3/Cd44/Col6a3/Itga7/Itgb8/Comp/Col4a3/Lamc3/Vwf/Itgb4/Gp1ba/Ibsp/Vtn/Thbs4/Lama2/Gp9/Spp1/Itga2/Sdc4/Dmp1/Col6a4/Itga10/Lamb3
rno04260	Cardiac muscle contraction	76	0.312273	1.29097	0.109596	0.247331	0.168369	2607	tags=32%, list=15%, signal=27%	29209/29715/290561/24837/116601/24851/29556/29557/24239/500450/59299/29275/292905/117557/116600/24852/29693/26192/25650/26198/114493/300047/689560/140447	Casq2/Slc8a1/Tnnc1/Tnnt2/Atp2a1/Tpm1/Myh6/Myh7/Cacna1c/Tpm2/Trdn/Actc1/Hrc/Tpm3/Cacnb2/Tpm4/Atp2a2/CYTB/Atp1b1/COX2/Cacna1f/Cyc1/Ryr2/Slc8a2
rno05132	Salmonella infection	236	-0.352197	-1.19968	0.110656	0.248047	0.168857	2665	tags=15%, list=15%, signal=13%	191572/500319/500363/29260/24516/282817/310460/161452/289337/56611/366508/361415/314906/316226/25272/679312/29213/25310/294691/24383/500133/289759/78971/25166/24498/191568/681314/315139/25493/29513/310553/24699/192181/24835/500377/24494	Ahnak/Tuba3a/Tuba3b/Tlr4/Jun/Pycard/Arhgef26/Lef1/Tlr5/Anxa2/Pik3cd/Dynlrb2/Kif5a/Klc4/Mapk10/Tubb1/Tubb4a/Cyct/Naip5/Gapdh/Nod1/Myl7/Birc3/Casp1/Il6/Naip6/Bax-ps2/Tab1/Nfkbia/Mapk13/Tlr2/Ptprc/Podxl/Tnf/Tuba8/Il1b
rno00590	Arachidonic acid metabolism	50	-0.446493	-1.29936	0.113971	0.253775	0.172755	2364	tags=36%, list=14%, signal=31%	25527/25086/311341/81639/367808/29526/114097/24300/298581/24693/287424/691907/25290/192227/29354/29527/361267/29692	Ptgis/Cyp2e1/Pla2g4b/Alox15/Ptges3l1/Pla2g1b/Ltc4s/Cyp2b1/Pla2g2e/Ptgs1/Aloxe3/Pla2g4f/Alox5/Ptgr1/Pla2g5/Ptgs2/Akr1c15/Pla2g2a
rno04713	Circadian entrainment	85	-0.410371	-1.27893	0.114903	0.254157	0.173016	2366	tags=25%, list=14%, signal=21%	64532/24681/25023/24408/50592/25679/29717/29241/50664/116560/114207/64199/29716/80850/29713/56827/24409/64455/114862/24167/24411	Adcy5/Prkcg/Prkcb/Grin1/Gria1/Itpr3/Cacna1g/Adcy8/Gnao1/Kcnj9/Ryr1/Gng11/Cacna1d/Gng2/Kcnj5/Cacna1i/Grin2a/Rasd1/Cacna1h/Adcyap1r1/Grin2c
rno05207	Chemical carcinogenesis - receptor activation	182	-0.360822	-1.20662	0.119748	0.26313	0.179124	3759	tags=31%, list=22%, signal=25%	301252/24918/81771/24423/314638/498340/29348/24861/363984/24890/100526599/66017/690504/54250/303836/295037/65030/25260/25398/171352/25444/24516/64532/100313972/24681/367808/24514/25023/366508/100314224/300850/29241/29487/84010/24300/24881/25590/59110/84410/25387/100313990/501110/257648/100314277/25426/114505/29716/100314213/100314007/24208/100313993/100526572/25645/83785/24421/24925/24296	Hsp90ab1/Stat5a/Rps6ka1/Gstm1/Creb3l3/Mgst3l1/Fgf7/Ugt1a1/Ikbke/Esr1/Mir3596c/Fgf20/Kpna7/Fgf2/Bcl6/Mgst2/Ephx2/Gstt1/Cacna1a/Cyp3a9/Fgf9/Jun/Adcy5/Mirlet7d/Prkcg/Ptges3l1/Jak2/Prkcb/Pik3cd/Mirlet7c2/Gsta4/Adcy8/Gstt2/Dll1/Cyp2b1/Wnt1/Chrna4/Aipl1/Klf5/Arrb1/Mirlet7b/Gsta6/Cacna1b/Mirlet7f-1os/Cyp1b1/Klf4/Cacna1d/Mirlet7a1/Mir29b2/Ar/Mirlet7i/Mir3556b/Adrb3/Vegfa/Gsta1/Adrb1/Cyp1a1
rno04071	Sphingolipid signaling pathway	119	-0.382166	-1.24523	0.12069	0.263453	0.179344	2274	tags=16%, list=13%, signal=14%	24681/365057/25023/366508/117256/303634/25272/64625/314438/29290/366957/24600/681314/25245/313339/29513/60399/24835/499174	Prkcg/Map3k5/Prkcb/Pik3cd/Ppp2r2c/Gna13/Mapk10/Bid/Degs2/Adora1/Rac2/Nos3/Bax-ps2/Bdkrb2/Acer2/Mapk13/S1pr5/Tnf/Cers3
rno05204	Chemical carcinogenesis - DNA adducts	41	-0.46123	-1.31399	0.121472	0.263453	0.179344	3654	tags=46%, list=21%, signal=37%	289197/171341/24423/498340/24861/297029/295037/25260/171352/24426/25086/300850/29487/501110/25426/24421/29527/25116/24296	Mgst3/Mgst1/Gstm1/Mgst3l1/Ugt1a1/Gstk1/Mgst2/Gstt1/Cyp3a9/Gstp1/Cyp2e1/Gsta4/Gstt2/Gsta6/Cyp1b1/Gsta1/Ptgs2/Hsd11b1/Cyp1a1
rno04390	Hippo signaling pathway	149	0.251833	1.12047	0.128395	0.276671	0.188342	2284	tags=19%, list=13%, signal=17%	252833/60660/303039/366031/500047/114487/282581/364754/683522/300289/252834/297357/81822/305251/25554/362675/64032/85265/361630/315824/304825/64512/315196/363913/308068/25744/25717/24577/361839	Gdf7/Ppp2r2b/Wwc1/Crb2/Wnt16/Wnt2/Fzd6/Fzd8/Tead4/Amot/Gdf6/Ctnna2/Actb/Rassf6/Snai2/Tp73/Ccn2/Ajuba/Tead1/Bmp5/Crb1/Fzd2/Wnt7b/Fzd10/Nkd2/Nf2/Tgfb3/Myc/Ctnna3
rno00071	Fatty acid degradation	44	-0.448578	-1.2935	0.135697	0.289517	0.197087	1172	tags=9%, list=7%, signal=8%	117243/171178/24172/310903	Acsl6/Adh7/Adh1c/Adh6
rno04520	Adherens junction	87	0.27007	1.13837	0.13609	0.289517	0.197087	2712	tags=23%, list=16%, signal=19%	296313/24553/297357/81822/305679/25554/294568/361084/63836/81634/24329/26955/682937/362317/288124/314843/361839/501831/501203/287876	Myl9/Met/Ctnna2/Actb/Vcl/Snai2/Wasf1/Lmo7/Actn4/Actn1/Egfr/Afdn/Wasf3/Krit1/Nectin3/Ptprb/Ctnna3/Myl10/Myl12a/Actg1
rno00670	One carbon pool by folate	33	0.36411	1.23245	0.137778	0.291252	0.198268	4630	tags=55%, list=27%, signal=40%	24962/64300/287379/25331/24312/288259/680308/29261/25134/299699/81643/498211/81522/171133/298942/29443/114123/291450	Cth/Mthfd1/Shmt1/Mat1a/Dhfr/Gart/Mthfd2/Tyms/Gnmt/Aldh1l2/Atic/Mat2al1/Mtr/Gcsh/Dld/Ahcy/Sardh/Aldh7a1
rno04510	Focal adhesion	195	-0.351112	-1.18364	0.139752	0.293555	0.199836	2720	tags=21%, list=16%, signal=18%	25412/29302/367313/81008/362800/24516/117558/25267/114858/360468/24681/25304/25023/366508/363265/291926/25272/311862/116669/25724/309419/24477/29169/29220/362973/309368/289759/296078/25156/366957/25353/679845/78971/689069/170921/83785/315981/310683/305078/295378/192213	Col2a1/Itgb3/Col6a3/Itga7/Itgb8/Jun/Mylk2/Pdgfra/Shc3/Emp2/Prkcg/Comp/Prkcb/Pik3cd/Col4a3/Mylk3/Mapk10/Lamc3/Vwf/Itgb4/Pip5k1b/Ibsp/Vtn/Thbs4/Parvb/Lama2/Myl7/Pak6/Vav1/Rac2/Spp1/Shc4/Birc3/Parvg/Itga2/Vegfa/Col6a4/Itga10/Lamb3/Vav3/Rasgrf1
rno05203	Viral carcinogenesis	186	-0.354067	-1.18797	0.140625	0.293555	0.199836	2724	tags=17%, list=16%, signal=14%	114851/295277/362268/309452/24516/84580/316711/687813/366508/24747/360323/25148/291157/100362738/83571/314856/679028/114090/25630/297453/298975/681314/294228/414779/25493/309603/414819/414791/25155/414789/24232	Cdkn1a/H4c14/Rbpjl/Nfkb2/Jun/Hdac5/Gtf2a1l/Traf1/Pik3cd/RT1-M3-1/RT1-N2/Egr3/Hist1h2bo/Pkml1/Cdkn1b/Mdm2/Rbpj/Egr2/Pkm/Hdac11/Scin/Bax-ps2/RT1-S3/RT1-CE2/Nfkbia/RT1-CE1/RT1-CE16/RT1-CE11/Syk/RT1-CE15/C3
rno04710	Circadian rhythm	33	-0.474582	-1.29336	0.142857	0.296362	0.201747	1927	tags=24%, list=11%, signal=22%	114519/24309/300807/252917/64562/79431/316351/306750	Nfil3/Dbp/Rora/Nr1d1/Prkab2/Bhlhe40/Npas2/Fbxl21
rno05020	Prion disease	249	-0.341612	-1.16945	0.149695	0.308629	0.210098	2219	tags=13%, list=13%, signal=11%	24686/24408/25679/366508/499512/314906/316226/25272/24237/29467/679312/29213/25310/114207/24330/257648/29716/366957/24498/364018/24472/681314/24409/29513/84683/24835/24411/500377/81780/24493/100362331/24494	Prnp/Grin1/Itpr3/Pik3cd/Atp5mc2l2/Kif5a/Klc4/Mapk10/C6/Ddit3/Tubb1/Tubb4a/Cyct/Ryr1/Egr1/Cacna1b/Cacna1d/Rac2/Il6/Ncf2/Hspa1a/Bax-ps2/Grin2a/Mapk13/Cox4i2/Tnf/Grin2c/Tuba8/Ccl5/Il1a/Ndufa4l2/Il1b
rno04917	Prolactin signaling pathway	65	-0.41217	-1.24097	0.158392	0.324522	0.220917	2379	tags=23%, list=14%, signal=20%	25329/114858/24514/366508/83681/24508/25272/294515/89829/116700/679845/366142/24385/25085/29513	Lhb/Shc3/Jak2/Pik3cd/Cish/Irf1/Mapk10/Foxo3/Socs3/Cga/Shc4/Elf5/Gck/Th/Mapk13
rno04144	Endocytosis	245	-0.340314	-1.16271	0.159346	0.324522	0.220917	3912	tags=19%, list=23%, signal=15%	362298/684122/84357/684097/81637/291553/171381/25631/117028/312502/303337/25704/406194/65218/687208/500564/362719/25267/140694/362279/361314/81921/687758/313409/116743/314906/24747/360323/309419/25387/314856/60628/25746/498650/24472/294228/414779/311785/309603/140924/414819/360605/287443/414791/307500/81760/414789	Actr3b/Asap3/Sh3kbp1/Snx3/Ap2a2/Nedd4l/Psd/Smad3/Bin1/Rab11fip5/Rab11fip4/Il2ra/RT1-T18/Agap2/Vps37d/Ldlrap1/Asap2/Pdgfra/Dnm1/Pard6b/Arap3/Sh3gl3/Pip5kl1/Dnajc6/Sh3gl2/Kif5a/RT1-M3-1/RT1-N2/Pip5k1b/Arrb1/Mdm2/Cxcr4/Il2rb/Rab11fip1/Hspa1a/RT1-S3/RT1-CE2/Psd4/RT1-CE1/Il2rg/RT1-CE16/Epn3/Acap1/RT1-CE11/Psd2/Grk1/RT1-CE15
rno04925	Aldosterone synthesis and secretion	89	-0.388947	-1.22612	0.160855	0.325577	0.221635	2701	tags=22%, list=16%, signal=19%	24180/24213/25400/64532/24681/25050/24214/25023/84396/25679/81743/29717/29241/24603/29553/29716/29713/56827/114862/171358	Agtr1a/Atp1a3/Camk2a/Adcy5/Prkcg/Camk4/Atp1b2/Prkcb/Atp1b4/Itpr3/Pde2a/Cacna1g/Adcy8/Npr1/Kcnk3/Cacna1d/Kcnj5/Cacna1i/Cacna1h/Camk1g
rno05414	Dilated cardiomyopathy	95	0.269214	1.15652	0.161814	0.325577	0.221635	2789	tags=35%, list=16%, signal=29%	364786/29715/114517/290561/311061/299940/24837/116601/24851/295929/29556/29557/81822/24239/500450/311144/25713/29275/117557/116600/29161/24852/315744/29693/24482/114493/25717/25437/689560/140447/287876/305941/316758	Itga8/Slc8a1/Itga6/Tnnc1/Itgb6/Sntb1/Tnnt2/Atp2a1/Tpm1/Mybpc3/Myh6/Myh7/Actb/Cacna1c/Tpm2/Itga4/Itgb7/Actc1/Tpm3/Cacnb2/Cav3/Tpm4/Itga11/Atp2a2/Igf1/Cacna1f/Tgfb3/Emd/Ryr2/Slc8a2/Actg1/Sgcg/Lama1
rno00380	Tryptophan metabolism	40	-0.439275	-1.24744	0.172202	0.341772	0.232659	3674	tags=35%, list=21%, signal=28%	688283/287305/312317/311844/681319/25120/24311/24248/316421/59113/25426/29416/54349/24296	Afmid/4930438A08Rikl/Doxl2/Kyat1/Ido2/Aanat/Ddc/Cat/Aox2/Kmo/Cyp1b1/Aadat/Aox1/Cyp1a1
rno00240	Pyrimidine metabolism	49	0.309258	1.16635	0.172775	0.341772	0.232659	2209	tags=29%, list=13%, signal=25%	316077/315219/24834/313560/64519/192252/362720/685579/191575/497778/290741/29261/81656/24240	Entpd3/Tymp/Tk1/Ctps1/Entpd1/Dctpp1/Rrm2/Rrm1/Nme1/Dut/Dctd/Tyms/Dpyd/Cad
rno04210	Apoptosis	123	-0.364546	-1.19189	0.172932	0.341772	0.232659	2754	tags=31%, list=16%, signal=26%	498013/314322/170929/170851/24842/311786/85383/83584/64044/246097/171293/25112/361704/25425/25385/500319/500363/362100/24516/64547/365057/687813/25679/366508/293676/684529/25272/29467/25310/317673/64625/78971/171081/681314/25493/24835/500377/59109	Ern1/Fos/Bcl2a1/Map2k1/Tp53/Traf2/Nol3/Casp6/Casp8/Fas/Ctsd/Gadd45a/Ctsf/Ctsh/Faslg/Tuba3a/Tuba3b/Endog/Jun/Bcl2l11/Map3k5/Traf1/Itpr3/Pik3cd/Ctsw/Ctso/Mapk10/Ddit3/Cyct/Bbc3/Bid/Birc3/Csf2rb/Bax-ps2/Nfkbia/Tnf/Tuba8/Ntrk1
rno05034	Alcoholism	126	-0.365125	-1.19247	0.174006	0.341871	0.232727	2633	tags=19%, list=15%, signal=16%	295277/83506/84580/64532/114858/24311/25050/24408/689408/50664/29316/291157/64199/80850/679845/297453/25054/24409/25085/680322/360616/25369/24316/24411	H4c14/Camkk2/Hdac5/Adcy5/Shc3/Ddc/Camk4/Grin1/H2az2l2/Gnao1/Adora2b/Hist1h2bo/Gng11/Gng2/Shc4/Hdac11/Ntrk2/Grin2a/Th/H2ac12/Ppp1r1b/Adora2a/Drd1/Grin2c
rno04148	Efferocytosis	151	-0.356135	-1.17684	0.175906	0.343408	0.233773	4405	tags=33%, list=25%, signal=25%	313210/29733/292844/444984/299858/282580/170851/309527/361400/29364/25277/170897/311658/25682/360426/691517/311287/299714/29184/501854/57027/29302/25400/306600/116689/81639/24514/25528/361929/29597/29221/499287/25027/25246/171109/24253/117264/29583/25290/303313/25166/24335/363578/89808/29527/29513/25325/24778/60587/24336	Abca1/S1pr1/Siglec10/Dnmt3a/Lrp1/Stab2/Map2k1/Ch25h/Nfatc3/Cd47/Mfge8/Sphk1/Nfatc2/Ppard/Pla2g6/Megf11/Ano3/Ano4/Cd36/Rab7b/Adam17/Itgb3/Camk2a/Atp11a/Ptpn6/Alox15/Jak2/Sirpa/Atp11b/P2ry2/Arg1/Ano9/Slc16a1/Bsg/Dusp5/Cebpb/P2ry6/Pecam1/Alox5/Scarf1/Casp1/Epo/Havcr2/Cx3cl1/Ptgs2/Mapk13/Il10/Slc2a1/Dusp4/Epor
rno04975	Fat digestion and absorption	35	-0.453813	-1.2547	0.176845	0.343408	0.233773	4701	tags=49%, list=27%, signal=35%	25081/313210/362039/94172/252900/29387/24254/24360/117554/29184/29526/298581/246115/25598/29354/432367/29692	Apoa1/Abca1/Pla2g12a/Slc27a1/Dgat2/Pla2g2c/Cel/Fabp1/Pnliprp2/Cd36/Pla2g1b/Pla2g2e/Plpp2/Fabp2/Pla2g5/Npc1l1/Pla2g2a
rno04924	Renin secretion	64	0.286707	1.15567	0.177914	0.343487	0.233827	1605	tags=20%, list=9%, signal=19%	24715/497757/25202/29749/29712/81742/81529/24239/24326/81638/25262/499721/25031	Ren/Gucy1a1/Gucy1b1/Ppp3r2/Kcnj2/Pde1c/Pde1a/Cacna1c/Ednra/Agtr1b/Itpr1/Clca4l/Plcb4
rno00900	Terpenoid backbone biosynthesis	24	0.393344	1.22619	0.182879	0.351044	0.238971	2958	tags=33%, list=17%, signal=28%	89784/308100/100364990/25675/83791/313564/29637/81726	Idi1/Acat2/Pdss1/Hmgcr/Fdps/Zmpste24/Hmgcs1/Mvd
rno05205	Proteoglycans in cancer	189	-0.344476	-1.1569	0.191867	0.366191	0.249282	2728	tags=20%, list=16%, signal=17%	282582/114851/29302/25400/25406/25385/29260/116689/89830/54319/24681/25023/25679/366508/140584/29496/360482/24881/84399/59327/314856/29139/29169/100314000/316526/25156/170921/24771/84426/315294/83785/64546/29513/295378/310553/64537/24835/81687	Wnt5b/Cdkn1a/Itgb3/Camk2a/Cd44/Faslg/Tlr4/Ptpn6/Ptch1/Ezr/Prkcg/Prkcb/Itpr3/Pik3cd/Wnt11/Erbb3/Tfap4/Wnt1/Ihh/Twist2/Mdm2/Dcn/Vtn/Mir21/Wnt6/Vav1/Itga2/Sdc4/Wnt4/Wnt10b/Vegfa/Il12b/Mapk13/Vav3/Tlr2/Hpse/Tnf/Mmp9
rno04922	Glucagon signaling pathway	94	-0.37965	-1.19461	0.194318	0.368763	0.251033	2317	tags=20%, list=13%, signal=18%	24701/24953/25679/83516/25623/116719/100362738/24533/64562/29634/59329/24642/25630/25741/24385/690987/60416/24778/64035	Pygm/Gcgr/Itpr3/Ppargc1a/Gys2/Acacb/Pkml1/Ldha/Prkab2/Ldhc/Sik1/Pgam1/Pkm/Pfkl/Gck/Gys1/Pfkp/Slc2a1/Pygl
rno00511	Other glycan degradation	17	-0.528952	-1.23916	0.197461	0.37261	0.253652	6184	tags=65%, list=36%, signal=42%	24591/290923/100216475/316033/303702/117185/361378/310864/24375/316642/294673	Neu1/Aga/Hexd/Glb1/Engase/Neu3/Man2b1/Manba/Fuca1/Neu4/Hexb
rno00480	Glutathione metabolism	61	-0.399136	-1.1935	0.206691	0.387835	0.264016	4678	tags=39%, list=27%, signal=29%	299976/298370/309465/289197/171341/116686/24423/498340/297029/408206/295037/25260/25283/24426/300850/29487/501110/64570/113892/29326/362368/102549803/81641/24421	Rrm2b/Txndc12/Gsto2/Mgst3/Mgst1/Gsr/Gstm1/Mgst3l1/Gstk1/Ggt6/Mgst2/Gstt1/Gclc/Gstp1/Gsta4/Gstt2/Gsta6/Nat8/Nat8f3/Gpx2/Ggct/Nat8f4/Anpep/Gsta1
rno04728	Dopaminergic synapse	119	-0.356546	-1.16175	0.212284	0.395413	0.269175	2661	tags=22%, list=15%, signal=19%	25400/24267/25398/64532/24681/24311/25023/50592/25679/314906/117256/25272/50664/116560/25387/257648/25432/64199/29716/80850/29713/24409/25085/360616/29513/24316	Camk2a/Comt/Cacna1a/Adcy5/Prkcg/Ddc/Prkcb/Gria1/Itpr3/Kif5a/Ppp2r2c/Mapk10/Gnao1/Kcnj9/Arrb1/Cacna1b/Drd4/Gng11/Cacna1d/Gng2/Kcnj5/Grin2a/Th/Ppp1r1b/Mapk13/Drd1
rno04670	Leukocyte transendothelial migration	103	-0.367204	-1.17316	0.213097	0.395413	0.269175	3699	tags=33%, list=21%, signal=26%	305341/500000/24772/116479/81686/155268/304125/304073/29337/304388/290789/54319/24681/300519/25023/680489/366508/25464/308995/25021/619374/59326/29583/60628/289759/25156/366957/309684/364018/287098/29513/295378/65129/81687	Rhoh/Cldn12/Cxcl12/F11r/Mmp2/Cldn16/Cldn17/Cldn14/Plcg2/Cldn15/Cldn23/Ezr/Prkcg/Esam/Prkcb/Cldn34e/Pik3cd/Icam1/Itgal/Itgam/Jam2/Rapgef3/Pecam1/Cxcr4/Myl7/Vav1/Rac2/Itgb2/Ncf2/Cldn6/Mapk13/Vav3/Cldn1/Mmp9
rno05224	Breast cancer	135	0.247884	1.10132	0.215081	0.396889	0.27018	2218	tags=19%, list=13%, signal=16%	313575/155437/60464/155430/64030/60664/29146/29369/500047/114487/282581/364754/308692/117516/497672/25149/24185/56718/64512/24329/315196/363913/24482/25154/24577	Heyl/Hey1/Fgf16/Hey2/Kit/Pik3r3/Jag1/Fgf18/Wnt16/Wnt2/Fzd6/Fzd8/Peg12/Tnfsf11/Brca1/Esr2/Akt1/Mtor/Fzd2/Egfr/Wnt7b/Fzd10/Igf1/Pgr/Myc
rno02010	ABC transporters	47	-0.414076	-1.20211	0.21787	0.398826	0.271498	2410	tags=26%, list=14%, signal=22%	84356/25303/287112/365362/24891/24811/24812/170913/24646/85264/81642/310836	Abcd2/Abcc2/Abca17/Abca14/Abcb4/Tap1/Tap2/Abcb1a/Abcb1b/Abcg1/Abcc6/Abca4
rno00650	Butanoate metabolism	22	0.384141	1.1723	0.218519	0.398826	0.271498	2181	tags=27%, list=13%, signal=24%	353317/65984/81632/308100/690163/29637	Acsm4/Aacs/Abat/Acat2/Oxct1/Hmgcs1
rno04068	FoxO signaling pathway	124	-0.351651	-1.14848	0.227371	0.412727	0.280961	2917	tags=22%, list=17%, signal=18%	25112/303836/65218/114851/25385/171043/64547/306330/366508/25139/24248/25272/24787/689161/83571/314856/294515/64562/500300/24498/24414/29157/29513/313558/84480/25325/294797	Gadd45a/Bcl6/Agap2/Cdkn1a/Faslg/Fbxo32/Bcl2l11/Klf2/Pik3cd/Slc2a4/Cat/Mapk10/Sod2/Gabarapl1/Cdkn1b/Mdm2/Foxo3/Prkab2/Depp1/Il6/Grm1/Ccng2/Mapk13/Foxo6/Bnip3/Il10/Il7r
rno05165	Human papillomavirus infection	310	-0.32171	-1.10777	0.230223	0.415646	0.282948	2728	tags=18%, list=16%, signal=16%	282582/114851/25412/29302/367313/25385/362268/81008/29757/362800/362279/83615/25304/363328/366508/363265/24508/140584/117256/24747/360323/311862/24881/116669/25724/100362738/83571/314856/24477/679028/29169/29220/309368/316526/25630/25353/312488/170921/84426/681314/406162/294228/414779/315294/83785/315981/310683/309603/305078/29527/414819/414791/24835/304545/414789/64628	Wnt5b/Cdkn1a/Col2a1/Itgb3/Col6a3/Faslg/Rbpjl/Itga7/Atp6v0a1/Itgb8/Pard6b/Atp6ap1/Comp/Ticam1/Pik3cd/Col4a3/Irf1/Wnt11/Ppp2r2c/RT1-M3-1/RT1-N2/Lamc3/Wnt1/Vwf/Itgb4/Pkml1/Cdkn1b/Mdm2/Ibsp/Rbpj/Vtn/Thbs4/Lama2/Wnt6/Pkm/Spp1/Atp6v1b1/Itga2/Wnt4/Bax-ps2/Notch4/RT1-S3/RT1-CE2/Wnt10b/Vegfa/Col6a4/Itga10/RT1-CE1/Lamb3/Ptgs2/RT1-CE16/RT1-CE11/Tnf/Oasl/RT1-CE15/Hes3
rno04977	Vitamin digestion and absorption	23	-0.477295	-1.20948	0.233468	0.417366	0.284119	2055	tags=17%, list=12%, signal=15%	80848/289175/314459/24710	Cubn/Slc19a2/Amn/Rbp2
rno05031	Amphetamine addiction	62	-0.390691	-1.16936	0.23417	0.417366	0.284119	2661	tags=24%, list=15%, signal=21%	25400/24516/64532/24681/24311/25050/25023/24408/50592/29716/24409/25085/360616/24316/24411	Camk2a/Jun/Adcy5/Prkcg/Ddc/Camk4/Prkcb/Grin1/Gria1/Cacna1d/Grin2a/Th/Ppp1r1b/Drd1/Grin2c
rno00760	Nicotinate and nicotinamide metabolism	38	-0.426749	-1.19874	0.234925	0.417366	0.284119	4643	tags=45%, list=27%, signal=33%	315085/299638/304539/316424/361532/58813/54410/100912521/100360582/499330/298881/316421/365699/363118/297508/54349/293504	Naprt/Sirt6/Sirt4/Aox4/Sirt2/Nt5e/Enpp3/Nmrk2/Nt5c/Nmrk1/Nt5c1b/Aox2/Nadk2/Nmnat3/Nampt/Aox1/Qprt
rno05022	Pathways of neurodegeneration - multiple diseases	442	-0.312723	-1.08931	0.248996	0.440025	0.299544	2274	tags=13%, list=13%, signal=11%	24681/365057/24686/25023/24408/81751/50592/25679/246294/499512/140584/293649/314906/316226/360827/24248/25272/29467/679312/24881/29213/295704/25310/690288/116671/114207/257648/287845/29716/64625/156767/29326/316526/207117/78965/24688/24498/24414/84426/29211/681314/29430/315294/24409/500442/29527/29513/84683/24587/29477/24835/24411/500377/24493/100362331/24494/24599	Prkcg/Map3k5/Prnp/Prkcb/Grin1/Psen2/Gria1/Itpr3/Optn/Atp5mc2l2/Wnt11/Lrp5/Kif5a/Klc4/Ulk1/Cat/Mapk10/Ddit3/Tubb1/Wnt1/Tubb4a/Ube2l6/Cyct/Dnah14/Cdk5r1/Ryr1/Cacna1b/Dnah17/Cacna1d/Bid/Tnfrsf1b/Gpx2/Wnt6/Dnah8/Csf1/Prph/Il6/Grm1/Wnt4/Sptbn2/Bax-ps2/Hap1/Wnt10b/Grin2a/Dnai1/Ptgs2/Mapk13/Cox4i2/Nefh/Mapt/Tnf/Grin2c/Tuba8/Il1a/Ndufa4l2/Il1b/Nos2
rno05214	Glioma	71	-0.376818	-1.15104	0.256055	0.450118	0.306415	3419	tags=25%, list=20%, signal=20%	684111/314612/25112/29337/114851/25400/25267/100362121/114858/24681/25050/25023/366508/24827/314856/679845/681314/171358	E2f2/Shc2/Gadd45a/Plcg2/Cdkn1a/Camk2a/Pdgfra/Ddb2/Shc3/Prkcg/Camk4/Prkcb/Pik3cd/Tgfa/Mdm2/Shc4/Bax-ps2/Camk1g
rno04911	Insulin secretion	76	-0.372942	-1.14857	0.257732	0.450245	0.306502	2745	tags=26%, list=16%, signal=22%	54262/24213/25400/64532/24681/24214/25023/84396/25679/29241/54261/25012/29716/24385/83731/29639/65206/54263/24167/24778	Kcnn2/Atp1a3/Camk2a/Adcy5/Prkcg/Atp1b2/Prkcb/Atp1b4/Itpr3/Adcy8/Kcnn1/Snap25/Cacna1d/Gck/Kcnma1/Fxyd2/Kcnn4/Kcnn3/Adcyap1r1/Slc2a1
rno00510	N-Glycan biosynthesis	53	0.292583	1.11391	0.258824	0.450245	0.306502	4485	tags=38%, list=26%, signal=28%	287983/360475/94273/296624/304646/313536/25478/311847/367083/295319/432392/293129/25197/295051/315212/81519/361174/245960/192275/362031	Alg3/Alg1/Mgat2/Dolpp1/Mgat4d/B4galt2/Man2a1/Dolk/Alg9/Man1a2/Fut8/Alg8/St6gal1/Alg5/Alg12/Mgat1/Alg11/Alg10/Dad1/Alg14
rno00360	Phenylalanine metabolism	16	-0.51096	-1.1919	0.261838	0.45313	0.308465	3347	tags=44%, list=19%, signal=35%	309147/287305/688800/24311/81683/366675/25375	Aldh3b1/4930438A08Rikl/Aldh3b2/Ddc/Mif/Mifl3/Aldh3a1
rno00250	Alanine, aspartate and glutamate metabolism	31	-0.43677	-1.17002	0.265544	0.456752	0.310931	3677	tags=29%, list=21%, signal=23%	192268/307759/287305/24379/362428/100362344/291133/684425/25698	Gls2/Gpt2/4930438A08Rikl/Gad1/Rimklb/Rimklbl1/Aldh5a1/Adss1/Ass1
rno05222	Small cell lung cancer	90	-0.36061	-1.13506	0.266667	0.456752	0.310931	2324	tags=20%, list=13%, signal=17%	303285/25112/114851/100362121/687813/366508/363265/311862/25310/83571/309368/78971/170921/681314/25493/305078/29527/24599	Traf4/Gadd45a/Cdkn1a/Ddb2/Traf1/Pik3cd/Col4a3/Lamc3/Cyct/Cdkn1b/Lama2/Birc3/Itga2/Bax-ps2/Nfkbia/Lamb3/Ptgs2/Nos2
rno05219	Bladder cancer	37	-0.417471	-1.15381	0.272844	0.463444	0.315486	4239	tags=38%, list=24%, signal=29%	170851/24842/300799/363140/25433/684111/81686/114851/300339/314856/83502/306722/83785/81687	Map2k1/Tp53/Dapk2/Rassf1/Hbegf/E2f2/Mmp2/Cdkn1a/Mmp1/Mdm2/Cdh1/Dapk1/Vegfa/Mmp9
rno00562	Inositol phosphate metabolism	78	-0.367839	-1.13737	0.273349	0.463444	0.315486	2056	tags=18%, list=12%, signal=16%	366508/687758/252899/306490/54259/290651/309419/500959/24849/171458/498731/500709/81677/497197	Pik3cd/Pip5kl1/Miox/Mtmr7/Inpp5d/Isyna1/Pip5k1b/Tpi1l1/Tpi1/Ipmk/Tpi1l2/Itpk1/Itpka/Plcz1
rno04920	Adipocytokine signaling pathway	67	-0.374729	-1.13389	0.275822	0.465275	0.316733	2210	tags=30%, list=13%, signal=26%	25520/24604/84021/171410/29184/83506/24514/25139/25272/83516/116719/24536/316241/89829/117243/64562/156767/25493/24778/24835	Prkag1/Npy/Irs3/Acsbg1/Cd36/Camkk2/Jak2/Slc2a4/Mapk10/Ppargc1a/Acacb/Lepr/Nfkbie/Socs3/Acsl6/Prkab2/Tnfrsf1b/Nfkbia/Slc2a1/Tnf
rno00592	alpha-Linolenic acid metabolism	22	-0.468241	-1.17217	0.278689	0.466956	0.317877	3750	tags=41%, list=22%, signal=32%	29387/360426/691905/311341/29526/298581/691907/29354/29692	Pla2g2c/Pla2g6/Pla2g4d/Pla2g4b/Pla2g1b/Pla2g2e/Pla2g4f/Pla2g5/Pla2g2a
rno00040	Pentose and glucuronate interconversions	20	-0.479316	-1.16917	0.279614	0.466956	0.317877	2535	tags=45%, list=15%, signal=38%	691002/290277/24861/289827/83472/316067/296972/116463/286921	Dhdh/Cryl1/Ugt1a1/Ugp2/Ugdh/Xylb/Akr1b10/Akr1b7/Akr1b8
rno04742	Taste transduction	49	0.289786	1.09291	0.282723	0.469798	0.319812	2381	tags=24%, list=14%, signal=21%	29705/60448/81742/685451/81529/502757/24239/25031/114115/24767/286924/499367	Gabra1/Htr1f/Pde1c/Gng13/Pde1a/Tas2r135/Cacna1c/Plcb4/P2rx2/Scnn1b/Gnat3/Calhm1
rno04915	Estrogen signaling pathway	108	-0.343944	-1.10739	0.290393	0.480155	0.326862	4299	tags=30%, list=25%, signal=22%	85385/24790/314322/170851/83633/301252/25433/314638/24705/171293/24890/314612/81686/50599/170538/24516/64532/114858/25679/366508/29241/50664/287700/116560/24827/679845/24414/24472/24600/29713/294853/81687	Shc1/Sp1/Fos/Map2k1/Gabbr2/Hsp90ab1/Hbegf/Creb3l3/Rara/Ctsd/Esr1/Shc2/Mmp2/Kcnj3/Prkcd/Jun/Adcy5/Shc3/Itpr3/Pik3cd/Adcy8/Gnao1/Krt15/Kcnj9/Tgfa/Shc4/Grm1/Hspa1a/Nos3/Kcnj5/Krt18/Mmp9
rno05032	Morphine addiction	74	-0.362288	-1.11467	0.299656	0.492349	0.335163	2929	tags=32%, list=17%, signal=27%	29691/50599/24922/63885/140929/65191/25398/64532/24681/25023/81743/29241/50664/29695/24947/116560/25387/257648/290646/64199/29290/80850/29713/24316	Pde1b/Kcnj3/Gabrb3/Pde10a/Pde7b/Gabre/Cacna1a/Adcy5/Prkcg/Prkcb/Pde2a/Adcy8/Gnao1/Gabrr2/Gabra3/Kcnj9/Arrb1/Cacna1b/Pde4c/Gng11/Adora1/Gng2/Kcnj5/Drd1
rno04976	Bile secretion	63	-0.372211	-1.11462	0.300716	0.492349	0.335163	4571	tags=40%, list=26%, signal=29%	170924/24212/24777/29725/297386/24255/83569/24861/24769/54262/24213/25303/64532/303879/24214/84396/29241/365549/24891/25552/60351/170913/24646/29639/24778	Abcc4/Atp1a2/Slc10a1/Baat/Slc4a5/Cftr/Abcb11/Ugt1a1/Sct/Kcnn2/Atp1a3/Abcc2/Adcy5/Slc51a/Atp1b2/Atp1b4/Adcy8/Slc5a1l1/Abcb4/Slc5a1/Nr1h4/Abcb1a/Abcb1b/Fxyd2/Slc2a1
rno04979	Cholesterol metabolism	43	-0.389536	-1.11983	0.309291	0.503918	0.343039	4857	tags=42%, list=28%, signal=30%	266770/25081/313210/299858/301517/287774/266732/83569/29216/25728/25649/29184/83529/500564/81782/24230/100361444/362850	Soat2/Apoa1/Abca1/Lrp1/Cyp27a1/Apoh/Npc1/Abcb11/Lrp2/Apoe/Apoa2/Cd36/Vdac1/Ldlrap1/Soat1/Tspo/Angptl8/Angptl4
rno00534	Glycosaminoglycan biosynthesis - heparan sulfate / heparin	24	0.354672	1.10564	0.311284	0.504703	0.343574	2838	tags=33%, list=16%, signal=28%	362035/364476/294449/299907/298690/29633/302489/292155	Ndst4/Hs6st3/Hs3st5/Ext1/B3galt6/Ndst1/Hs6st2/Hs2st1
rno05033	Nicotine addiction	27	-0.436417	-1.14022	0.313078	0.50516	0.343884	2761	tags=44%, list=16%, signal=37%	24922/65191/25398/24408/50592/29695/24947/25590/257648/116638/24409/24411	Gabrb3/Gabre/Cacna1a/Grin1/Gria1/Gabrr2/Gabra3/Chrna4/Cacna1b/Slc17a7/Grin2a/Grin2c
rno03010	Ribosome	297	-0.310518	-1.06686	0.317123	0.509226	0.346652	5345	tags=43%, list=31%, signal=30%	64306/108351377/301371/309440/100360252/81729/81776/688784/161477/689284/64156/100362366/79449/293846/499803/81774/26962/363817/140661/29236/499523/29285/140662/117042/57809/140655/29284/81765/122772/65043/124323/296995/65136/64640/498555/301552/81768/303815/29286/100359505/81775/360572/122799/140654/81773/117053/29283/29258/100362298/64205/25348/108348980/245981/294282/362631/100360843/64298/287…	Rpl27/Rpl35al2/Mrps9/Mrpl43/Rpl31l2/Rpl10a/Rps24/Rpl27l1/Rps13/Rpl38/Uba52/LOC100362366/Rpl21/Rpl28l2/Rps3l1/Rps11/Rpl8/Rpl27al7/Rplp1/Rpsa/Rpl23al1/Rps15/Rplp2/Rpl6/Rpl35a/Rps16/Rps14/Rpl13/Rps20/Rpl14/Rps23/Mrps33/Rps8/Rpl30/Rplp2l2/Mrpl44/Rpl22/Rpl12l2/Rps17/LOC100359505/Rps21/Rpl23a/Rps25/Rps3/Rps10/Rps15a/Rpl29/Rps7/Rps18l5/Rplp0/Rps29/Rps29l5/Rpl15/Rps18/Rpl11/Rps19l3/Rpl31/Mrpl45/Rpl24/Rpl…
rno01523	Antifolate resistance	28	-0.426056	-1.12315	0.329427	0.526453	0.35838	802	tags=11%, list=5%, signal=10%	24498/24835/24494	Il6/Tnf/Il1b
rno04923	Regulation of lipolysis in adipocytes	52	-0.370544	-1.09188	0.339372	0.539763	0.36744	2366	tags=21%, list=14%, signal=18%	64532/366508/29241/24603/24693/116700/29290/25645/79451/29527/24925	Adcy5/Pik3cd/Adcy8/Npr1/Ptgs1/Cga/Adora1/Adrb3/Fabp4/Ptgs2/Adrb1
rno04912	GnRH signaling pathway	83	-0.3496	-1.08901	0.34127	0.540209	0.367744	2661	tags=25%, list=15%, signal=22%	25433/171492/691905/81686/25400/170538/24516/25329/64532/311341/25023/25679/29241/25272/25194/24330/691907/29716/116667/116700/29513	Hbegf/Map3k2/Pla2g4d/Mmp2/Camk2a/Prkcd/Jun/Lhb/Adcy5/Pla2g4b/Prkcb/Itpr3/Adcy8/Mapk10/Gnrh1/Egr1/Pla2g4f/Cacna1d/Map3k1/Cga/Mapk13
rno04114	Oocyte meiosis	109	0.240394	1.0355	0.344828	0.543266	0.369825	4943	tags=47%, list=28%, signal=34%	29749/25729/317203/64515/25515/680006/25262/297176/25203/300121/315330/261730/296137/24482/362485/25154/54237/64193/363088/689314/287280/117269/360643/60352/363174/362356/56011/100362453/290227/24672/302950/288671/362817/501560/309179/63996/311412/287101/29486/84420/24242/24244/361389/691455/299147/25577/24668/305509/50663/307511/291689	Ppp3r2/Ccne1/Rps6ka6/Cdc20/Plk1/Mad1l1/Itpr1/Mad2l1/Ccnb1/Smc1b/Espl1/Aurka/Bub1/Igf1/Ccne2/Pgr/Cdk1/Pttg1/Ccnb2/Mapk11/Skp1/Rps6ka2/Cdc27/Mapk12/Sgo1/Cul1/Ywhab/Ppp2cal1/Rec8/Ppp2ca/Adcy9/Anapc5/Cdk2/Rps6ka3/Ppp2r5b/Smc1a/Anapc1/Pkmyt1/Smc3/Adcy7/Calm1/Calm3/Anapc10/Calml4/Ppp2r5e/Ywhaq/Ppp1ca/Adcy1/Calm2/Cdc25c/Cdc23
rno00340	Histidine metabolism	21	-0.442882	-1.09693	0.359116	0.563121	0.383341	1066	tags=38%, list=6%, signal=36%	309147/89833/688800/312317/299735/24443/25375/29301	Aldh3b1/Ftcd/Aldh3b2/Doxl2/Amdhd1/Hdc/Aldh3a1/Hal
rno04370	VEGF signaling pathway	55	-0.361997	-1.07222	0.364734	0.569258	0.387519	3976	tags=31%, list=23%, signal=24%	170851/170897/311658/310688/691905/314612/29337/311341/24681/25023/366508/691907/366957/24600/83785/29527/29513	Map2k1/Sphk1/Nfatc2/Sh2d2a/Pla2g4d/Shc2/Plcg2/Pla2g4b/Prkcg/Prkcb/Pik3cd/Pla2g4f/Rac2/Nos3/Vegfa/Ptgs2/Mapk13
rno00604	Glycosphingolipid biosynthesis - ganglio series	15	-0.48806	-1.12124	0.368644	0.572684	0.389851	1576	tags=53%, list=9%, signal=49%	64828/316033/407765/407764/171079/294673/364901/25280	B4galnt1/Glb1/St6galnac6/St6galnac4/B3galt4/Hexb/St8sia5/St8sia1
rno04974	Protein digestion and absorption	90	-0.336308	-1.05857	0.370621	0.573091	0.390128	2720	tags=22%, list=16%, signal=19%	25412/24213/367313/301012/25253/24214/84396/363265/687064/117522/302668/94341/311716/499431/29639/315981/65206/246235/315071/25550	Col2a1/Atp1a3/Col6a3/Col7a1/Dpp4/Atp1b2/Atp1b4/Col4a3/Col25a1/Xpnpep2/Ace2/Kcnj13/Col20a1/Col13a1/Fxyd2/Col6a4/Kcnn4/Slc36a2/Col22a1/Slc1a1
rno00983	Drug metabolism - other enzymes	61	-0.356097	-1.0648	0.377539	0.581097	0.395578	3654	tags=31%, list=21%, signal=25%	24423/498340/24861/688542/497811/295037/25260/24426/25086/300850/29487/29225/501232/24346/501110/24421/289801/362638/679817	Gstm1/Mgst3l1/Ugt1a1/Ces2el1/Xdh/Mgst2/Gstt1/Gstp1/Cyp2e1/Gsta4/Gstt2/Ces1e/Cesl1/Ces1c/Gsta6/Gsta1/Upp1/Cda/Ces1a
rno00561	Glycerolipid metabolism	57	-0.356291	-1.05874	0.382318	0.583565	0.397259	4118	tags=32%, list=24%, signal=24%	309014/252900/362261/140866/363494/24254/367745/117554/170919/362972/296130/296972/313977/246115/313997/116463/305166/286921	Plpp4/Dgat2/Lpin3/Dgka/Gla/Cel/Dgkk/Pnliprp2/Agpat4/Pnpla3/Gpat2/Akr1b10/Lpin1/Plpp2/Mboat2/Akr1b7/Gpat3/Akr1b8
rno00591	Linoleic acid metabolism	25	-0.412007	-1.06099	0.383091	0.583565	0.397259	2436	tags=48%, list=14%, signal=41%	29387/360426/691905/171352/25086/311341/81639/29526/298581/691907/29354/29692	Pla2g2c/Pla2g6/Pla2g4d/Cyp3a9/Cyp2e1/Pla2g4b/Alox15/Pla2g1b/Pla2g2e/Pla2g4f/Pla2g5/Pla2g2a
rno04727	GABAergic synapse	71	-0.34636	-1.058	0.38639	0.583565	0.397259	2509	tags=38%, list=14%, signal=33%	60355/114120/83633/192268/25451/24379/24922/64845/65191/25398/64532/24681/192208/25023/171373/29241/50664/29695/24947/689161/252919/257648/64199/29716/80850/50676/29430	Nsf/Gng12/Gabbr2/Gls2/Gabrb2/Gad1/Gabrb3/Gphn/Gabre/Cacna1a/Adcy5/Prkcg/Slc38a5/Prkcb/Slc12a5/Adcy8/Gnao1/Gabrr2/Gabra3/Gabarapl1/Slc38a3/Cacna1b/Gng11/Cacna1d/Gng2/Slc6a12/Hap1
rno05010	Alzheimer disease	354	-0.300897	-1.04097	0.387097	0.583565	0.397259	2127	tags=11%, list=12%, signal=10%	24408/81751/25679/366508/499512/140584/293649/314906/316226/360827/25272/29467/679312/306009/24881/29213/25310/116671/300051/29716/24383/64625/316526/78965/24498/84426/315294/24409/29527/84683/29477/24835/300802/24411/500377/24493/100362331/24494/24599	Grin1/Psen2/Itpr3/Pik3cd/Atp5mc2l2/Wnt11/Lrp5/Kif5a/Klc4/Ulk1/Mapk10/Ddit3/Tubb1/Slc39a14/Wnt1/Tubb4a/Cyct/Cdk5r1/Slc39a4/Cacna1d/Gapdh/Bid/Wnt6/Csf1/Il6/Wnt4/Wnt10b/Grin2a/Ptgs2/Cox4i2/Mapt/Tnf/Aph1b/Grin2c/Tuba8/Il1a/Ndufa4l2/Il1b/Nos2
rno04213	Longevity regulating pathway - multiple species	57	0.260117	1.02288	0.387879	0.583565	0.397259	4762	tags=42%, list=27%, signal=31%	301518/60664/25420/78975/309757/24185/56718/25467/84576/84577/24482/24963/83840/85243/65248/293621/302950/367858/287871/297893/84420/361696/65041/305509	Prkag3/Pik3r3/Cryab/Prkaa2/Sirt1/Akt1/Mtor/Irs1/Hdac1l/Hdac2/Igf1/Hspa1l/Rps6kb1/Pik3cb/Prkaa1/Hras/Adcy9/Hrasl1/Rptor/Hdac1/Adcy7/Rps6kb2/Clpb/Adcy1
rno05208	Chemical carcinogenesis - reactive oxygen species	211	-0.308576	-1.04283	0.395469	0.590322	0.401858	2507	tags=13%, list=14%, signal=11%	25260/170538/24516/25086/365057/366508/499512/300850/29487/24248/25272/24787/24314/501110/294515/25426/364018/83785/24421/25493/304784/29513/361267/84683/24451/24296/100362331	Gstt1/Prkcd/Jun/Cyp2e1/Map3k5/Pik3cd/Atp5mc2l2/Gsta4/Gstt2/Cat/Mapk10/Sod2/Nqo1/Gsta6/Foxo3/Cyp1b1/Ncf2/Vegfa/Gsta1/Nfkbia/Slc26a9/Mapk13/Akr1c15/Cox4i2/Hmox1/Cyp1a1/Ndufa4l2
rno04972	Pancreatic secretion	85	-0.338667	-1.05547	0.395904	0.590322	0.401858	3750	tags=28%, list=22%, signal=22%	29387/24255/84590/24269/24254/24889/117554/24769/24213/64532/24681/24214/29526/25023/84396/25679/29241/298581/24203/29354/83731/29639/308016/29692	Pla2g2c/Cftr/Rab27b/Cpa1/Cel/Cckar/Pnliprp2/Sct/Atp1a3/Adcy5/Prkcg/Atp1b2/Pla2g1b/Prkcb/Atp1b4/Itpr3/Adcy8/Pla2g2e/Amy1/Pla2g5/Kcnma1/Fxyd2/Clca2/Pla2g2a
rno04971	Gastric acid secretion	66	0.256062	1.03142	0.4	0.593504	0.404024	2020	tags=18%, list=12%, signal=16%	29719/297910/29712/170847/288057/81822/25262/25031/171138/84020/25650/170899	Kcnj16/Slc26a7/Kcnj2/Kcnj15/Mylk/Actb/Itpr1/Plcb4/Kcne2/Kcnq1/Atp1b1/Kcnk2
rno04146	Peroxisome	80	-0.337814	-1.0484	0.401593	0.593504	0.404024	3775	tags=24%, list=22%, signal=19%	500368/282634/114209/297029/497811/85249/65030/367112/113956/117254/100363379/84356/79238/24248/24787/114027/117243/297570/24599	Far2/Pxmp4/Phyh/Gstk1/Xdh/Pex11a/Ephx2/Hmgcll1/Pecr/Prdx1/Prdx1l1/Abcd2/Hmgcl/Cat/Sod2/Dao/Acsl6/Pex26/Nos2
rno00513	Various types of N-glycan biosynthesis	44	0.286282	1.03661	0.407609	0.597966	0.407061	4485	tags=36%, list=26%, signal=27%	291770/287983/360475/94273/304646/308511/313536/25478/367083/295319/432392/315212/81519/361174/192275/362031	Chst9/Alg3/Alg1/Mgat2/Mgat4d/Chst8/B4galt2/Man2a1/Alg9/Man1a2/Fut8/Alg12/Mgat1/Alg11/Dad1/Alg14
rno00531	Glycosaminoglycan degradation	15	-0.472222	-1.08485	0.408192	0.597966	0.407061	2290	tags=47%, list=13%, signal=41%	300993/360630/316033/299825/363513/294673/64537	Hyal3/Naglu/Glb1/Gns/Ids/Hexb/Hpse
rno01521	EGFR tyrosine kinase inhibitor resistance	76	-0.338035	-1.04107	0.415808	0.606462	0.412845	2335	tags=21%, list=13%, signal=18%	25267/64547/114858/24681/24514/25023/366508/29496/432361/24827/24499/294515/679845/24498/681314/83785	Pdgfra/Bcl2l11/Shc3/Prkcg/Jak2/Prkcb/Pik3cd/Erbb3/Nrg2/Tgfa/Il6r/Foxo3/Shc4/Il6/Bax-ps2/Vegfa
rno00730	Thiamine metabolism	17	-0.450361	-1.05505	0.423131	0.611917	0.416559	1441	tags=29%, list=8%, signal=27%	367308/64621/24183/314416/29223	Alpg/Akp3/Ak1/Ak7/Ak4
rno03320	PPAR signaling pathway	68	-0.341148	-1.03345	0.423212	0.611917	0.416559	4128	tags=32%, list=24%, signal=25%	301517/83792/24860/25682/171410/25649/24360/29184/50522/363331/499358/140638/79131/81924/298199/300339/117243/25598/291582/79451/140914/362850	Cyp27a1/Scd2/Ucp1/Ppard/Acsbg1/Apoa2/Fabp1/Cd36/Ubc/Plin4/Scd4/Apoa5/Fabp3/Cyp8b1/Plin2/Mmp1/Acsl6/Fabp2/Slc27a6/Fabp4/Olr1/Angptl4
rno04371	Apelin signaling pathway	125	-0.317567	-1.03675	0.435345	0.619415	0.421663	2376	tags=19%, list=14%, signal=17%	84580/64532/117558/24617/25050/306330/25692/25679/291926/29241/303634/498607/83516/114207/24330/64562/64199/83502/80850/25353/24600/24585/58812/24599	Hdac5/Adcy5/Mylk2/Serpine1/Camk4/Klf2/Plat/Itpr3/Mylk3/Adcy8/Gna13/Mef2b/Ppargc1a/Ryr1/Egr1/Prkab2/Gng11/Cdh1/Gng2/Spp1/Nos3/Myl3/Apln/Nos2
rno00061	Fatty acid biosynthesis	18	-0.440479	-1.04382	0.435644	0.619415	0.421663	1534	tags=22%, list=9%, signal=20%	361802/116719/117243/64669	Hsd17b8/Acacb/Acsl6/Olah
rno04015	Rap1 signaling pathway	197	-0.30378	-1.02628	0.438469	0.619415	0.421663	2412	tags=18%, list=14%, signal=16%	25444/94268/307171/64532/25267/24681/362279/361314/361442/25023/24408/366508/362799/29241/116546/308995/50664/296269/29316/25021/59326/170583/81511/78965/83502/25156/24596/366957/309684/499537/114705/83785/24409/29513/295378/25369	Fgf9/Efna1/Apbb1ip/Adcy5/Pdgfra/Prkcg/Pard6b/Arap3/Sipa1l2/Prkcb/Grin1/Pik3cd/Rapgef5/Adcy8/Ralb/Itgal/Gnao1/Angpt4/Adora2b/Itgam/Rapgef3/Fgf23/Lat/Csf1/Cdh1/Vav1/Ngfr/Rac2/Itgb2/Fyb1/Rgs14/Vegfa/Grin2a/Mapk13/Vav3/Adora2a
rno05215	Prostate cancer	98	-0.321545	-1.02127	0.438695	0.619415	0.421663	2724	tags=16%, list=16%, signal=14%	114851/303828/24426/25267/161452/25692/366508/24827/83571/314856/24208/24414/25493/171045/81687/60663	Cdkn1a/Etv5/Gstp1/Pdgfra/Lef1/Plat/Pik3cd/Tgfa/Cdkn1b/Mdm2/Ar/Grm1/Nfkbia/Mmp3/Mmp9/Insrr
rno04137	Mitophagy - animal	95	-0.321702	-1.0146	0.438914	0.619415	0.421663	5612	tags=34%, list=32%, signal=23%	689996/290652/29560/360797/315599/309165/64156/299827/292886/114490/361568/24790/24842/56816/311786/100912032/64862/317376/25482/25094/501854/113894/50522/24516/246294/360827/25272/689161/140923/294515/84480/499973	Tomm20l/Fkbp8/Hif1a/Rabgef1/Nlrx1/Rela/Uba52/Tbk1/Tbc1d17/Cited2/Rras/Sp1/Tp53/Prkn/Traf2/Rps27a/Map1lc3b/Tfe3/Mras/Mitf/Rab7b/Sqstm1/Ubc/Jun/Optn/Ulk1/Mapk10/Gabarapl1/Bnip3l/Foxo3/Bnip3/Atg9b
rno04723	Retrograde endocannabinoid signaling	129	-0.314	-1.0254	0.439525	0.619415	0.421663	3253	tags=23%, list=19%, signal=19%	25451/24418/120099907/289218/50599/24922/65191/25398/64532/24681/25023/50592/25679/29241/25272/50664/29695/24947/116560/257648/64199/29716/116638/80850/24414/29713/29527/29513/100911581/100362331	Gabrb2/Grm5/LOC120099907/Ndufs2/Kcnj3/Gabrb3/Gabre/Cacna1a/Adcy5/Prkcg/Prkcb/Gria1/Itpr3/Adcy8/Mapk10/Gnao1/Gabrr2/Gabra3/Kcnj9/Cacna1b/Gng11/Cacna1d/Slc17a7/Gng2/Grm1/Kcnj5/Ptgs2/Mapk13/Faah/Ndufa4l2
rno05231	Choline metabolism in cancer	94	-0.322454	-1.01463	0.446591	0.626728	0.426641	2389	tags=33%, list=14%, signal=29%	361076/25738/24790/314322/170851/116636/85254/140866/691905/367745/29503/29194/24516/25267/311341/24681/362866/25023/286936/366508/294255/25272/309419/317371/246115/691907/64037/303140/366957/29504/295417	Dgkh/Plcg1/Sp1/Fos/Map2k1/Eif4ebp1/Slc44a1/Dgka/Pla2g4d/Dgkk/Slc22a2/Chka/Jun/Pdgfra/Pla2g4b/Prkcg/Chpt1/Prkcb/Pcyt1b/Pik3cd/Slc44a4/Mapk10/Pip5k1b/Was/Plpp2/Pla2g4f/Slc22a4/Slc22a21/Rac2/Slc22a3/Slc44a3
rno05160	Hepatitis C	136	-0.310914	-1.01927	0.456498	0.637952	0.434282	3749	tags=23%, list=22%, signal=18%	64044/500000/246097/364594/363984/286918/684111/155268/304125/304073/288264/114851/304388/25385/290789/363328/680489/366508/117256/192281/246268/25310/89829/64625/287098/681314/25493/24835/65190/65129/245920	Casp8/Cldn12/Fas/Tlr3/Ikbke/Mx2/E2f2/Cldn16/Cldn17/Cldn14/Ifnar1/Cdkn1a/Cldn15/Faslg/Cldn23/Ticam1/Cldn34e/Pik3cd/Ppp2r2c/Oas1a/Oas1b/Cyct/Socs3/Bid/Cldn6/Bax-ps2/Nfkbia/Tnf/Rsad2/Cldn1/Cxcl10
rno05223	Non-small cell lung cancer	70	-0.330936	-1.01049	0.465438	0.647463	0.440756	2917	tags=24%, list=17%, signal=20%	170851/24842/363140/24918/684111/25112/29337/114851/100362121/24681/25023/366508/314906/24827/294515/681314/24716	Map2k1/Tp53/Rassf1/Stat5a/E2f2/Gadd45a/Plcg2/Cdkn1a/Ddb2/Prkcg/Prkcb/Pik3cd/Kif5a/Tgfa/Foxo3/Bax-ps2/Ret
rno04215	Apoptosis - multiple species	33	-0.369334	-1.00653	0.467181	0.647463	0.440756	2326	tags=24%, list=13%, signal=21%	64547/25272/25310/317673/64625/24596/78971/681314	Bcl2l11/Mapk10/Cyct/Bbc3/Bid/Ngfr/Birc3/Bax-ps2
rno04720	Long-term potentiation	60	-0.330331	-0.990614	0.493476	0.681078	0.46364	2274	tags=20%, list=13%, signal=17%	25400/24681/25050/25023/24408/50592/25679/29241/59326/24414/24409/24411	Camk2a/Prkcg/Camk4/Prkcb/Grin1/Gria1/Itpr3/Adcy8/Rapgef3/Grm1/Grin2a/Grin2c
rno04960	Aldosterone-regulated sodium reabsorption	32	-0.365561	-0.990002	0.49806	0.684136	0.465722	3584	tags=34%, list=21%, signal=27%	291553/25672/24213/24681/24214/25122/25023/84396/366508/29639/64190	Nedd4l/Nr3c2/Atp1a3/Prkcg/Atp1b2/Scnn1a/Prkcb/Atp1b4/Pik3cd/Fxyd2/Fxyd4
rno04540	Gap junction	81	-0.319099	-0.991162	0.502278	0.684136	0.465722	3711	tags=25%, list=21%, signal=20%	25523/171492/24392/24418/25187/29595/500319/500363/64532/25267/24681/25023/25679/29241/679312/29213/24414/24316/24925/500377	Prkg2/Map3k2/Gja1/Grm5/Htr2c/Htr2a/Tuba3a/Tuba3b/Adcy5/Pdgfra/Prkcg/Prkcb/Itpr3/Adcy8/Tubb1/Tubb4a/Grm1/Drd1/Adrb1/Tuba8
rno04928	Parathyroid hormone synthesis, secretion and action	106	-0.310333	-0.993185	0.502756	0.684136	0.465722	2366	tags=17%, list=14%, signal=15%	64532/24681/24695/25023/114700/25679/293649/29241/303634/25548/25387/24330/290646/25279/170583/84395/80722/171052	Adcy5/Prkcg/Pthlh/Prkcb/Cyp27b1/Itpr3/Lrp5/Adcy8/Gna13/Slc34a1/Arrb1/Egr1/Pde4c/Cyp24a1/Fgf23/Slc34a2/Sost/Mmp13
rno00512	Mucin type O-glycan biosynthesis	29	-0.365869	-0.970728	0.505181	0.684136	0.465722	2669	tags=28%, list=15%, signal=23%	170501/313233/287920/100361647/100360475/366061/292325/290638	Galnt10/Galnt12/St6galnac1/Galnt6/Galnt15/Galnt3/B3gnt6/B3gnt3
rno04550	Signaling pathways regulating pluripotency of stem cells	122	-0.303441	-0.990201	0.505933	0.684136	0.465722	2210	tags=17%, list=13%, signal=15%	24514/83711/366508/25196/681740/140584/299210/64549/24881/29381/25366/114505/681178/316526/60584/293847/84426/294503/315294/29513/25587	Jak2/Inhbe/Pik3cd/Inhbb/Jarid2/Wnt11/Esrrb/Inhbc/Wnt1/Acvr1b/Acvr2b/Klf4/Pcgf5/Wnt6/Lif/Dusp9/Wnt4/Nodal/Wnt10b/Mapk13/Id2
rno00450	Selenocompound metabolism	16	0.335595	0.947312	0.524648	0.706582	0.481001	4281	tags=38%, list=25%, signal=28%	24962/308993/291314/363285/81522/299851	Cth/Sephs2/Sephs1/Scly/Mtr/Mars1
rno04142	Lysosome	119	-0.299723	-0.976603	0.530172	0.711155	0.484114	6184	tags=42%, list=36%, signal=27%	24591/290923/54398/300993/293485/360630/286898/361939/29186/25151/83534/311404/316033/63865/252929/307901/360658/293455/361378/25715/25524/24944/117106/89783/171575/310864/299825/24375/315047/79248/315165/367562/363494/266732/171293/65161/361704/25425/29757/315676/363513/83615/293676/684529/60575/100362547/361063/294673/316519/25732	Neu1/Aga/Ppt2/Hyal3/Cln3/Naglu/Npc2/Mfsd8/Cd63/Igf2r/Tpp1/Ap4e1/Glb1/Lgmn/Ctsz/Meak7/Gga3/Gga2/Man2b1/Slc11a2/Psap/Lamp2/Scarb2/Laptm5/Dnase2/Manba/Gns/Fuca1/Laptm4b/Abca2/Naga/Gaa/Gla/Npc1/Ctsd/Litaf/Ctsf/Ctsh/Atp6v0a1/Dmxl2/Ids/Atp6ap1/Ctsw/Ctso/Napsa/Ap1g2/Entpd4/Hexb/Slc11a1/Acp5
rno04964	Proximal tubule bicarbonate reclamation	21	-0.386537	-0.957373	0.53453	0.713125	0.485456	2699	tags=29%, list=16%, signal=24%	24213/24214/84396/29242/252919/29639	Atp1a3/Atp1b2/Atp1b4/Car4/Slc38a3/Fxyd2
rno04740	Olfactory transduction	104	-0.303012	-0.968813	0.535912	0.713125	0.485456	3136	tags=37%, list=18%, signal=30%	406005/405079/405129/300205/405113/298734/405131/405141/365332/405982/405963/304990/404959/299596/686641/309225/298468/29691/25400/553106/314396/81743/293759/294152/405207/365333/113911/298394/405280/25387/405196/293302/291929/85257/309222/287001/295795/405943	Olr1585/Or10n1/Or11g24/Or11m3/Or12k5/Or13c7c/Or2a57/Or2f1b/Or52h9/Or6b2/Or6c1/Or6k8/Or7a38/Or7a41/Or9m1l1/Or5a3/Or13p10/Pde1b/Camk2a/Ncald/Slc24a4/Pde2a/Or4d11/Or2g7/Or13c7e/Or52d3/Gucy2e/Or13c7d/Or7a36/Arrb1/Olr1675/Or52u1/Or7c19/Cnga3/Or10v1/Or6f2/Or5aq1b/Or5aq7b
rno04330	Notch signaling pathway	60	-0.321485	-0.964086	0.542112	0.718513	0.489123	2901	tags=17%, list=17%, signal=14%	498089/57027/362268/81751/84010/679028/406162/29147/687424/300802	Dtx3l/Adam17/Rbpjl/Psen2/Dll1/Rbpj/Notch4/Jag2/Dtx1/Aph1b
rno04934	Cushing syndrome	138	-0.291637	-0.956531	0.546825	0.721895	0.491425	2728	tags=17%, list=16%, signal=15%	282582/114851/24180/25400/64532/161452/25679/29717/140584/29241/24881/29553/59110/83571/29716/316526/25469/84426/315294/56827/64455/83826/114862/64680	Wnt5b/Cdkn1a/Agtr1a/Camk2a/Adcy5/Lef1/Itpr3/Cacna1g/Wnt11/Adcy8/Wnt1/Kcnk3/Aipl1/Cdkn1b/Cacna1d/Wnt6/Kcna4/Wnt4/Wnt10b/Cacna1i/Rasd1/Nr5a1/Cacna1h/Crhr2
rno00600	Sphingolipid metabolism	52	-0.322856	-0.951354	0.550725	0.722818	0.492054	1607	tags=13%, list=9%, signal=12%	83626/316642/294673/246115/314438/313339/499174	Ugcg/Neu4/Hexb/Plpp2/Degs2/Acer2/Cers3
rno00515	Mannose type O-glycan biosynthesis	22	0.305081	0.93103	0.551852	0.722818	0.492054	4051	tags=36%, list=23%, signal=28%	311202/361368/362567/493574/308390/313536/316091/84430	Large2/Large1/Pomgnt1/Crppa/Fkrp/B4galt2/Pomgnt2/Pomt1
rno04927	Cortisol synthesis and secretion	58	-0.321164	-0.955692	0.554361	0.723268	0.49236	2701	tags=19%, list=16%, signal=16%	24180/64532/25679/29717/29241/29553/29716/25469/56827/83826/114862	Agtr1a/Adcy5/Itpr3/Cacna1g/Adcy8/Kcnk3/Cacna1d/Kcna4/Cacna1i/Nr5a1/Cacna1h
rno00563	Glycosylphosphatidylinositol (GPI)-anchor biosynthesis	27	0.295683	0.94516	0.563265	0.730308	0.497153	5700	tags=52%, list=33%, signal=35%	300046/315807/378774/362518/287159/688174/362756/295543/364032/192263/79112/361344/353304/303277	Gpaa1/Pigb/Pigw/Pgap4/Pigq/Pgap3/Pigh/Pigk/Pigc/Pigl/Pigm/Mppe1/Pigu/Pigs
rno04350	TGF-beta signaling pathway	110	-0.29678	-0.956871	0.56413	0.730308	0.497153	2700	tags=20%, list=16%, signal=17%	498299/64507/313529/29199/25644/81516/83711/25196/316742/29530/64549/29381/25366/29139/679119/293135/288562/252835/294503/315728/25587/24835	Lefty1/Fmod/Tmem53/Hfe/Bmp6/Smad7/Inhbe/Inhbb/Tgif1/Amhr2/Inhbc/Acvr1b/Acvr2b/Dcn/Bmp8b/Lrrc32/Tfr2/Gdf5/Nodal/Thsd4/Id2/Tnf
rno04962	Vasopressin-regulated water reabsorption	40	-0.322227	-0.915051	0.586716	0.752355	0.512161	1648	tags=8%, list=9%, signal=7%	360500/362456/65133	Arhgdig/Arhgdib/Aqp3
rno00770	Pantothenate and CoA biosynthesis	20	0.309989	0.932166	0.586957	0.752355	0.512161	5137	tags=50%, list=30%, signal=35%	367181/81656/360511/298490/85496/64203/298079/65183/363069/29592	Gadl1/Dpyd/Pank3/Ppcs/Enpp1/Bcat2/Aldh1b1/Aldh3a2/Ppcdc/Bcat1
rno05017	Spinocerebellar ataxia	137	-0.287642	-0.942063	0.587918	0.752355	0.512161	2608	tags=16%, list=15%, signal=14%	362268/25398/25696/24681/365057/25023/24408/50592/25679/366508/360827/25272/25310/114207/679028/300807/24414/29211/24409/117101/84012/24411	Rbpjl/Cacna1a/Vldlr/Prkcg/Map3k5/Prkcb/Grin1/Gria1/Itpr3/Pik3cd/Ulk1/Mapk10/Cyct/Ryr1/Rbpj/Rora/Grm1/Sptbn2/Grin2a/Kcnc3/Slc1a6/Grin2c
rno00532	Glycosaminoglycan biosynthesis - chondroitin sulfate / dermatan sulfate	21	0.301589	0.918726	0.597122	0.761217	0.518194	5500	tags=52%, list=32%, signal=36%	361450/291577/298690/691394/365583/306375/302302/296733/364675/500257/292999	Ust/Chsy3/B3galt6/Chst14/Dse/Csgalnact1/Chst7/Chpf2/B4galt7/Chst13/Chsy1
rno04611	Platelet activation	117	-0.288068	-0.936422	0.602162	0.764723	0.52058	2387	tags=19%, list=14%, signal=16%	307171/64532/117558/311341/25679/366508/367901/291926/29241/303634/24693/292661/116669/691992/691907/29251/502858/170921/24600/29513/498276/25155	Apbb1ip/Adcy5/Mylk2/Pla2g4b/Itpr3/Pik3cd/Btk/Mylk3/Adcy8/Gna13/Ptgs1/Ptgir/Vwf/Gp1ba/Pla2g4f/F2/Gp9/Itga2/Nos3/Mapk13/Fcgr2al1/Syk
rno04914	Progesterone-mediated oocyte maturation	83	0.229169	0.957824	0.616667	0.777469	0.529257	4943	tags=42%, list=28%, signal=30%	60664/293502/317203/25515/114494/680006/297176/25203/24185/261730/296137/24482/25154/54237/363088/689314/117269/360643/60352/85243/302950/288671/171102/362817/501560/314642/29516/311412/287101/84420/64363/361389/305509/307511/291689	Pik3r3/Kif22/Rps6ka6/Plk1/Ccna2/Mad1l1/Mad2l1/Ccnb1/Akt1/Aurka/Bub1/Igf1/Pgr/Cdk1/Ccnb2/Mapk11/Rps6ka2/Cdc27/Mapk12/Pik3cb/Adcy9/Anapc5/Cdc25a/Cdk2/Rps6ka3/Fzr1/Pde3b/Anapc1/Pkmyt1/Adcy7/Araf/Anapc10/Adcy1/Cdc25c/Cdc23
rno04725	Cholinergic synapse	96	-0.290116	-0.919409	0.616854	0.777469	0.529257	3007	tags=23%, list=17%, signal=19%	117052/50599/25400/25398/64532/83817/24681/25050/24514/25023/25679/366508/29241/50664/259273/25590/257648/64199/116649/29716/80850/29682	Kcnj12/Kcnj3/Camk2a/Cacna1a/Adcy5/Ache/Prkcg/Camk4/Jak2/Prkcb/Itpr3/Pik3cd/Adcy8/Gnao1/Kcnq5/Chrna4/Cacna1b/Gng11/Kcnj4/Cacna1d/Gng2/Kcnq3
rno04270	Vascular smooth muscle contraction	123	-0.283062	-0.92548	0.621912	0.779272	0.530484	2447	tags=22%, list=14%, signal=19%	170538/64532/117558/311341/24681/25029/29526/25023/25679/291926/29241/24603/303634/298581/29316/292661/56820/691907/171519/29716/24241/29354/83731/29412/25369/25026/29692	Prkcd/Adcy5/Mylk2/Pla2g4b/Prkcg/Calcrl/Pla2g1b/Prkcb/Itpr3/Mylk3/Adcy8/Npr1/Gna13/Pla2g2e/Adora2b/Ptgir/Ramp3/Pla2g4f/Calcb/Cacna1d/Calca/Pla2g5/Kcnma1/Adra1a/Adora2a/Adm/Pla2g2a
rno04935	Growth hormone synthesis, secretion and action	109	-0.287609	-0.925483	0.622951	0.779272	0.530484	2415	tags=28%, list=14%, signal=24%	25321/25738/59301/81678/85385/314322/170851/24918/314638/84021/314612/171044/29337/24484/64532/114858/24681/24514/25023/25679/366508/29241/25272/29446/89829/29716/116667/679845/29513/54305	Ghrhr/Plcg1/Ghrl/Itpr2/Shc1/Fos/Map2k1/Stat5a/Creb3l3/Irs3/Shc2/Sstr3/Plcg2/Igfbp3/Adcy5/Shc3/Prkcg/Jak2/Prkcb/Itpr3/Pik3cd/Adcy8/Mapk10/Ghrh/Socs3/Cacna1d/Map3k1/Shc4/Mapk13/Sstr2
rno00430	Taurine and hypotaurine metabolism	15	-0.381445	-0.876307	0.629944	0.782401	0.532614	4470	tags=53%, list=26%, signal=40%	29725/81718/246247/24379/408206/84493/246245/25256	Baat/Cdo1/Fmo4/Gad1/Ggt6/Fmo3/Fmo2/Fmo1
rno00190	Oxidative phosphorylation	121	0.211205	0.92277	0.630137	0.782401	0.532614	5806	tags=47%, list=33%, signal=32%	171028/25309/26203/294504/26202/26199/366545/116455/26192/26201/26193/29754/26198/26200/300047/301458/100361934/297797/26194/297990/293652/295923/293991/289217/293655/299739/288088/293453/25282/362802/81728/310856/497902/291660/299954/362440/192241/114630/361385/94271/301123/362897/685596/293130/301011/362588/681024/299643/361663/294964/65262/690441/171374/303393/54322/100911483/116550	Atp12a/Cycs/ND6/Ppa1/ND5/ND3/Atp6v1e2/Atp6v0a2/CYTB/ND4/ND1/Atp5mc1/COX2/ND4L/Cyc1/Ndufs1/Ndufb4l4/Atp6v1h/ND2/Ndufb6/Ndufs8/Ndufs3/Ndufb8/Sdhc/Ndufv1/Ndufa12/Ndufb4/Ndufab1/Cox6a1/Atp6v1c2/Ndufv2/Ppa2/Uqcrq/Ndufa2/Ndufb9/Ndufa9/Atp5po/Atp5mc3/Ndufb7/Atp5pf/Ndufa11/Uqcrb/Uqcrbl1/Ndufc2/Uqcrc1/Ndufs5/Ndufa4/Ndufa7/Lhpp/Ndufb5/Atp5f1a/Atp5mf/Atp5f1b/Cox7b/Cox6c/Ndufa13/Atp5f1c
rno00514	Other types of O-glycan biosynthesis	39	0.25908	0.907908	0.633166	0.783118	0.533103	4051	tags=36%, list=23%, signal=28%	313878/288091/79214/83627/29750/361142/313536/288611/362760/494219/311039/25197/60433/84430	Galnt14/Poglut1/Galnt1/Galnt5/Galnt7/Galntl6/B4galt2/Galnt17/Galnt16/Eogt/Galnt13/St6gal1/Rfng/Pomt1
rno03083	Polycomb repressive complex	81	0.22531	0.937082	0.637097	0.783118	0.533103	3457	tags=23%, list=20%, signal=19%	303907/100360260/310511/304419/309550/363519/303753/84576/312299/84577/79435/287280/361178/100360453/300320/83712/313978/296653/288306	Wdr5b/Cbx3l1/Rbbp4l1/Auts2/L3mbtl3/Hcfc1/Foxk2/Hdac1l/Ezh2/Hdac2/Ube2d2b/Skp1/Tfdp1/Cbx3l2/L3mbtl2/Rbbp7/E2f6/Phf19/Usp16
rno04918	Thyroid hormone synthesis	68	-0.297565	-0.901424	0.637749	0.783118	0.533103	3845	tags=28%, list=22%, signal=22%	116686/24210/314638/29216/29440/81819/79107/24213/64532/24681/24214/25023/84396/25679/29241/499879/116700/29326/29639	Gsr/Asgr1/Creb3l3/Lrp2/Slc26a4/Pax8/Duox2/Atp1a3/Adcy5/Prkcg/Atp1b2/Prkcb/Atp1b4/Itpr3/Adcy8/Duoxa2/Cga/Gpx2/Fxyd2
rno05217	Basal cell carcinoma	55	-0.300609	-0.890397	0.64372	0.787555	0.536123	2917	tags=22%, list=17%, signal=18%	25112/282582/114851/89830/100362121/161452/140584/24881/316526/84426/681314/315294	Gadd45a/Wnt5b/Cdkn1a/Ptch1/Ddb2/Lef1/Wnt11/Wnt1/Wnt6/Wnt4/Bax-ps2/Wnt10b
rno04980	Cobalamin transport and metabolism	17	0.302239	0.871727	0.651877	0.794624	0.540935	1610	tags=18%, list=9%, signal=16%	313520/363519/299196	Mmachc/Hcfc1/Abcd4
rno04360	Axon guidance	176	0.219664	1.00458	0.657685	0.79837	0.543485	2182	tags=17%, list=13%, signal=15%	252833/311236/29749/296313/289392/60664/84494/25311/24553/316539/29210/29202/306636/306534/24338/287989/29524/171287/360272/296789/79208/246331/29433/312279/65172/362049/290562/29431/29751/29271	Gdf7/Lrrc4c/Ppp3r2/Myl9/Plxna2/Pik3r3/Trpc4/Dcc/Met/Epha4/Epha3/Epha6/Efnb2/Unc5d/Ephb1/Ephb3/Limk2/Epha7/Slit2/Sema3e/Epha5/Nrp1/Pak3/Epha1/Limk1/Unc5c/Sema3g/Pak1/Sema3a/Cfl1
rno04340	Hedgehog signaling pathway	47	-0.302833	-0.879159	0.659731	0.79837	0.543485	3955	tags=21%, list=23%, signal=16%	84392/25388/64086/140589/29216/89830/84399/25387/301073/84380	Kif3a/Arrb2/Csnk1g1/Gli1/Lrp2/Ptch1/Ihh/Arrb1/Hhatl/Dhh
rno05014	Amyotrophic lateral sclerosis	341	-0.26849	-0.927595	0.69697	0.840389	0.57209	2127	tags=11%, list=12%, signal=9%	24408/50592/25679/246294/499512/314906/316226/360827/24248/29467/679312/361824/432361/29213/25310/690288/287845/64625/156767/29326/207117/24688/25166/29482/681314/29430/24409/500442/29513/84683/24587/24835/24411/500377/100362331/24599	Grin1/Gria1/Itpr3/Optn/Atp5mc2l2/Kif5a/Klc4/Ulk1/Cat/Ddit3/Tubb1/Chchd10/Nrg2/Tubb4a/Cyct/Dnah14/Dnah17/Bid/Tnfrsf1b/Gpx2/Dnah8/Prph/Casp1/Slc1a2/Bax-ps2/Hap1/Grin2a/Dnai1/Mapk13/Cox4i2/Nefh/Tnf/Grin2c/Tuba8/Ndufa4l2/Nos2
rno03272	Virion - Hepatitis viruses	41	-0.292957	-0.834596	0.706748	0.849115	0.57803	3667	tags=29%, list=21%, signal=23%	500000/24936/313641/155268/304125/304073/304388/290789/25253/680489/287098/65129	Cldn12/Cd9/Hspg2/Cldn16/Cldn17/Cldn14/Cldn15/Cldn23/Dpp4/Cldn34e/Cldn6/Cldn1
rno04218	Cellular senescence	158	-0.267688	-0.887582	0.716102	0.855587	0.582435	4304	tags=25%, list=25%, signal=19%	361568/170851/24842/25164/116636/361400/25482/363924/311658/24356/295052/25631/684111/317389/406194/83529/25112/114851/361857/113894/24484/24617/298765/25679/366508/24747/360323/66026/314856/294515/29716/24498/294228/414779/309603/29513/414819/414791/24493/414789	Rras/Map2k1/Tp53/Cdkn2b/Eif4ebp1/Nfatc3/Mras/Rad9b/Nfatc2/Ets1/Ccna1/Smad3/E2f2/Ccnb3/RT1-T18/Vdac1/Gadd45a/Cdkn1a/Traf3ip2/Sqstm1/Igfbp3/Serpine1/Zfp36l2/Itpr3/Pik3cd/RT1-M3-1/RT1-N2/Trpv4/Mdm2/Foxo3/Cacna1d/Il6/RT1-S3/RT1-CE2/RT1-CE1/Mapk13/RT1-CE16/RT1-CE11/Il1a/RT1-CE15
rno04961	Endocrine and other factor-regulated calcium reabsorption	47	-0.289998	-0.841897	0.717258	0.855587	0.582435	3657	tags=26%, list=21%, signal=20%	81637/56813/24890/24213/24681/140694/24214/25023/84396/83839/29639/25245	Ap2a2/Pth1r/Esr1/Atp1a3/Prkcg/Dnm1/Atp1b2/Prkcb/Atp1b4/Calb1/Fxyd2/Bdkrb2
rno00270	Cysteine and methionine metabolism	49	0.228124	0.86036	0.732984	0.869076	0.591618	4516	tags=37%, list=26%, signal=27%	24962/84596/58835/25331/81829/84350/293820/25134/498211/81522/81640/306540/24551/29443/313790/288912/64203/360816	Cth/Srm/Phgdh/Mat1a/Mdh2/Dnmt1/Psat1/Gnmt/Mat2al1/Mtr/Amd1/Got1l1/Mdh1/Ahcy/Lacc1/Mri1/Bcat2/Sdsl
rno05210	Colorectal cancer	86	-0.272868	-0.853829	0.736723	0.869076	0.591618	2917	tags=17%, list=17%, signal=15%	25112/114851/24516/64547/100362121/161452/366508/116546/25272/25310/24827/317673/59325/366957/681314	Gadd45a/Cdkn1a/Jun/Bcl2l11/Ddb2/Lef1/Pik3cd/Ralb/Mapk10/Cyct/Tgfa/Bbc3/Ereg/Rac2/Bax-ps2
rno04966	Collecting duct acid secretion	22	-0.32253	-0.807404	0.743169	0.869076	0.591618	4602	tags=41%, list=27%, signal=30%	79430/297566/299971/299159/117596/308069/29757/24779/312488	Clcnkb/Atp6v1e1/Atp6v1c1/Atp6v1d/Atp6v1b2/Slc12a7/Atp6v0a1/Slc4a1/Atp6v1b1
rno04921	Oxytocin signaling pathway	138	-0.264923	-0.868911	0.743811	0.869076	0.591618	3573	tags=25%, list=21%, signal=20%	300992/50688/29565/691905/140726/117052/50599/114851/25400/83506/24516/64532/117558/311341/24681/25050/25023/25679/291926/29241/24603/50664/140725/116560/114207/691907/64562/116649/29716/294329/24600/29713/140729/29527/171358	Cacna2d2/Cacnb1/Eef2/Pla2g4d/Cacng5/Kcnj12/Kcnj3/Cdkn1a/Camk2a/Camkk2/Jun/Adcy5/Mylk2/Pla2g4b/Prkcg/Camk4/Prkcb/Itpr3/Mylk3/Adcy8/Npr1/Gnao1/Cacng4/Kcnj9/Ryr1/Pla2g4f/Prkab2/Kcnj4/Cacna1d/Trpm2/Nos3/Kcnj5/Cacng8/Ptgs2/Camk1g
rno00785	Lipoic acid metabolism	18	0.275919	0.821507	0.745763	0.869076	0.591618	4283	tags=50%, list=25%, signal=38%	289950/29611/299201/81654/29711/360975/171133/298942/365314	Pdhb/Dbt/Dlst/Dlat/Bckdhb/Ogdh/Gcsh/Dld/Lipt2
rno04614	Renin-angiotensin system	20	-0.329281	-0.803196	0.746556	0.869076	0.591618	1039	tags=35%, list=6%, signal=33%	24182/293648/293118/24180/302668/81641/64017	Agtr2/Mrgprd/Prcp/Agtr1a/Ace2/Anpep/Enpep
rno01040	Biosynthesis of unsaturated fatty acids	30	0.250869	0.825743	0.746781	0.869076	0.591618	4046	tags=37%, list=23%, signal=28%	681458/171402/498728/680115/25541/300783/84013/501072/246074/83512/362540	Scd3/Elovl6/Elovl2/Hacd1/Scp2/Hacd3/Hsd17b12/Acaa1b/Scd/Fads2/Hacd4
rno05415	Diabetic cardiomyopathy	195	-0.259659	-0.875344	0.749482	0.869191	0.591697	3006	tags=16%, list=17%, signal=14%	171293/25631/81686/290604/120099907/29184/289218/503429/83529/29248/24180/25400/296849/170538/24681/25023/89813/366508/25139/499512/25272/25623/24383/366957/364018/690987/24600/29513/24778/84683/100362331/81687	Ctsd/Smad3/Mmp2/Gapdhl10/LOC120099907/Cd36/Ndufs2/Mpc1l/Vdac1/Tnni3/Agtr1a/Camk2a/Pdk3/Prkcd/Prkcg/Prkcb/Pdk4/Pik3cd/Slc2a4/Atp5mc2l2/Mapk10/Gys2/Gapdh/Rac2/Ncf2/Gys1/Nos3/Mapk13/Slc2a1/Cox4i2/Ndufa4l2/Mmp9
rno00541	Biosynthesis of various nucleotide sugars	19	-0.332159	-0.798611	0.767181	0.884604	0.602188	2921	tags=21%, list=17%, signal=18%	296560/289827/83472/361245	Uap1l1/Ugp2/Ugdh/Cmah
rno01240	Biosynthesis of cofactors	133	-0.259396	-0.847556	0.768069	0.884604	0.602188	3761	tags=23%, list=22%, signal=18%	361819/688283/294521/313689/367308/24861/619580/83578/114106/64621/286964/681319/297805/289827/64845/25283/361472/727679/83472/59113/65156/24183/24314/365699/684425/363118/314416/293504/29223/29244	Pdxkl1/Afmid/Ak9/Dhrs3/Alpg/Ugt1a1/Ctps2/Pdxk/Bco1/Akp3/Hsd17b6/Ido2/Sdr16c5/Ugp2/Gphn/Gclc/Mthfd1l/Pdxp/Ugdh/Kmo/Dhodh/Ak1/Nqo1/Nadk2/Adss1/Nmnat3/Ak7/Qprt/Ak4/Gch1
rno00410	beta-Alanine metabolism	27	-0.301845	-0.78863	0.775429	0.885702	0.602936	366	tags=22%, list=2%, signal=22%	64304/309147/688800/24379/25375/308652	Acads/Aldh3b1/Aldh3b2/Gad1/Aldh3a1/Smox
rno05225	Hepatocellular carcinoma	160	-0.25973	-0.860252	0.77577	0.885702	0.602936	2958	tags=27%, list=17%, signal=23%	25738/64566/309465/85385/170851/24842/289197/100360552/171341/24423/498340/25631/684111/314612/58819/25112/295037/29337/282582/114851/25260/24426/100362121/114858/24681/161452/25023/366508/300850/140584/293649/29487/24881/24827/24314/501110/316526/679845/84426/681314/315294/24421/24451	Plcg1/Wnt5a/Gsto2/Shc1/Map2k1/Tp53/Mgst3/Fzd7/Mgst1/Gstm1/Mgst3l1/Smad3/E2f2/Shc2/Txnrd1/Gadd45a/Mgst2/Plcg2/Wnt5b/Cdkn1a/Gstt1/Gstp1/Ddb2/Shc3/Prkcg/Lef1/Prkcb/Pik3cd/Gsta4/Wnt11/Lrp5/Gstt2/Wnt1/Tgfa/Nqo1/Gsta6/Wnt6/Shc4/Wnt4/Bax-ps2/Wnt10b/Gsta1/Hmox1
rno04810	Regulation of actin cytoskeleton	210	-0.256656	-0.868534	0.776978	0.885702	0.602936	2546	tags=16%, list=15%, signal=14%	81008/362800/25444/117558/25267/54319/100360623/366508/291926/303634/308995/24237/117542/25021/25724/309419/298890/60628/29251/170583/289759/296078/25156/366957/309684/170921/298975/310683/25245/24559/295378/81509/60663	Itga7/Itgb8/Fgf9/Mylk2/Pdgfra/Ezr/Iqgap2/Pik3cd/Mylk3/Gna13/Itgal/C6/Baiap2/Itgam/Itgb4/Pip5k1b/Cyria/Cxcr4/F2/Fgf23/Myl7/Pak6/Vav1/Rac2/Itgb2/Itga2/Scin/Itga10/Bdkrb2/Mos/Vav3/Bdkrb1/Insrr
rno05220	Chronic myeloid leukemia	76	-0.263925	-0.812824	0.786942	0.891413	0.606824	4299	tags=24%, list=25%, signal=18%	85385/170851/24842/309696/24918/25631/684111/314612/25112/114851/100362121/114858/366508/83571/314856/679845/681314/25493	Shc1/Map2k1/Tp53/Bcr/Stat5a/Smad3/E2f2/Shc2/Gadd45a/Cdkn1a/Ddb2/Shc3/Pik3cd/Cdkn1b/Mdm2/Shc4/Bax-ps2/Nfkbia
rno00230	Purine metabolism	123	-0.252833	-0.826645	0.787325	0.891413	0.606824	3833	tags=27%, list=22%, signal=21%	292072/308758/294521/58813/54410/245708/114248/114768/293613/497811/29691/63885/100360582/297998/140929/191569/64532/81743/298881/29241/24603/361063/83585/314140/24183/113911/24645/290646/684425/25095/314416/25711/29223	Aprt/Hddc3/Ak9/Nt5e/Enpp3/Gucy2g/Pde6h/Uox/Urah/Xdh/Pde1b/Pde10a/Nt5c/Nudt2/Pde7b/Pde9a/Adcy5/Pde2a/Nt5c1b/Adcy8/Npr1/Entpd4/Gda/Prps1l3/Ak1/Gucy2e/Pgm1/Pde4c/Adss1/Ampd3/Ak7/Gucy2c/Ak4
rno01210	2-Oxocarboxylic acid metabolism	29	0.250675	0.809136	0.791304	0.892891	0.60783	5421	tags=59%, list=31%, signal=40%	289950/29611/50655/361596/299201/81654/29711/360975/114096/79250/306540/298942/64203/300981/170587/29592/361272	Pdhb/Dbt/Aco1/Idh2/Dlst/Dlat/Bckdhb/Ogdh/Idh3a/Aco2/Got1l1/Dld/Bcat2/Acy1/Cs/Bcat1/Dhtkd1
rno04012	ErbB signaling pathway	83	-0.254619	-0.793145	0.809524	0.905078	0.616126	2875	tags=19%, list=17%, signal=16%	29337/114851/25400/24516/114858/24681/25023/366508/29496/25272/432361/24827/83571/59325/296078/679845	Plcg2/Cdkn1a/Camk2a/Jun/Shc3/Prkcg/Prkcb/Pik3cd/Erbb3/Mapk10/Nrg2/Tgfa/Cdkn1b/Ereg/Pak6/Shc4
rno04150	mTOR signaling pathway	142	-0.253882	-0.833645	0.809677	0.905078	0.616126	2751	tags=15%, list=16%, signal=13%	100362347/282582/303185/363138/24681/362171/25023/366508/140584/293649/360827/24881/313977/316526/312488/84426/315294/140942/297960/24835/293561	Fnip1/Wnt5b/Flcn/Nprl2/Prkcg/Prr5l/Prkcb/Pik3cd/Wnt11/Lrp5/Ulk1/Wnt1/Lpin1/Wnt6/Atp6v1b1/Wnt4/Wnt10b/Ddit4/Rragd/Tnf/Rnf152
rno04530	Tight junction	151	-0.252338	-0.833845	0.810235	0.905078	0.616126	4003	tags=25%, list=23%, signal=20%	25109/362298/304109/310655/25520/500000/24255/291553/116479/155268/304125/304073/54265/304388/500319/500363/290789/24516/293057/54319/314640/362279/365057/680489/315795/117256/25272/619374/317371/288515/64562/29716/116667/500464/287098/366733/65129/500377	Cd1d1/Actr3b/Tiam1/Cgn/Prkag1/Cldn12/Cftr/Nedd4l/F11r/Cldn16/Cldn17/Cldn14/Llgl1/Cldn15/Tuba3a/Tuba3b/Cldn23/Jun/Whamm/Ezr/Tjp3/Pard6b/Map3k5/Cldn34e/Cgnl1/Ppp2r2c/Mapk10/Jam2/Was/Micall2/Prkab2/Cacna1d/Map3k1/Epb41l4b/Cldn6/Diras3/Cldn1/Tuba8
rno04919	Thyroid hormone signaling pathway	118	-0.248265	-0.806261	0.820152	0.908975	0.618779	2274	tags=16%, list=13%, signal=14%	84511/29337/29302/24213/24681/259248/24214/25023/84396/366508/314856/25741/140666/84426/29639/497197/406162/60416/24778	Slco1c1/Plcg2/Itgb3/Atp1a3/Prkcg/Slc16a2/Atp1b2/Prkcb/Atp1b4/Pik3cd/Mdm2/Pfkl/Rcan2/Wnt4/Fxyd2/Plcz1/Notch4/Pfkp/Slc2a1
rno01232	Nucleotide metabolism	76	-0.256662	-0.790455	0.82016	0.908975	0.618779	1979	tags=13%, list=11%, signal=12%	298881/361063/83585/24183/684425/25095/314416/289801/362638/29223	Nt5c1b/Entpd4/Gda/Ak1/Adss1/Ampd3/Ak7/Upp1/Cda/Ak4
rno05012	Parkinson disease	246	-0.248422	-0.849097	0.82449	0.908975	0.618779	2661	tags=11%, list=15%, signal=9%	25400/301000/50522/500319/500363/64532/365057/25679/499512/314906/316226/25272/29467/679312/306009/29213/295704/25310/300051/681314/25085/25369/24316/84683/29477/500377/100362331	Camk2a/Uba7/Ubc/Tuba3a/Tuba3b/Adcy5/Map3k5/Itpr3/Atp5mc2l2/Kif5a/Klc4/Mapk10/Ddit3/Tubb1/Slc39a14/Tubb4a/Ube2l6/Cyct/Slc39a4/Bax-ps2/Th/Adora2a/Drd1/Cox4i2/Mapt/Tuba8/Ndufa4l2
rno05412	Arrhythmogenic right ventricular cardiomyopathy	80	-0.249849	-0.775404	0.827076	0.908975	0.618779	4389	tags=36%, list=25%, signal=27%	25297/315346/500364/303468/312668/685269/300992/50688/24392/140726/24598/29302/81008/680229/362800/171009/81679/161452/140725/364605/25724/29716/309368/64362/170921/140729/310683/306871/291760	Cacnb3/Itga5/Sspn/Sgca/Cacna2d4/Itga2b/Cacna2d2/Cacnb1/Gja1/Cacng5/Nos1/Itgb3/Itga7/Sgcb/Itgb8/Actn3/Jup/Lef1/Cacng4/Sgcz/Itgb4/Cacna1d/Lama2/Des/Itga2/Cacng8/Itga10/Dsp/Dsc2
rno04310	Wnt signaling pathway	158	-0.248251	-0.823134	0.827331	0.908975	0.618779	2437	tags=15%, list=14%, signal=13%	282582/25400/312563/24516/503000/24681/161452/25023/499949/140584/293649/25272/24881/500863/316526/366957/84426/80722/310552/315294/25445/295691/362770/303412	Wnt5b/Camk2a/Prickle2/Jun/Ctnnbip1/Prkcg/Lef1/Prkcb/Apcdd1l/Wnt11/Lrp5/Mapk10/Wnt1/Rspo2/Wnt6/Rac2/Wnt4/Sost/Sfrp2/Wnt10b/Fosl1/Frzb/Ccdc88c/Rnf43
rno05100	Bacterial invasion of epithelial cells	75	0.205513	0.845786	0.832061	0.909586	0.619195	3712	tags=25%, list=21%, signal=20%	60664/24553/297357/81822/305679/294568/29161/361251/361839/287876/116561/170922/305227/171574/85243/25404/25614/24511/83788	Pik3r3/Met/Ctnna2/Actb/Vcl/Wasf1/Cav3/Elmo1/Ctnna3/Actg1/Cltb/Ilk/Septin11/Dnm3/Pik3cb/Cav1/Ptk2/Itgb1/Septin9
rno00630	Glyoxylate and dicarboxylate metabolism	28	0.23925	0.76753	0.833333	0.909586	0.619195	4008	tags=32%, list=23%, signal=25%	287379/308100/81829/500536/50655/79250/171133/24551/298942	Shmt1/Acat2/Mdh2/Hyi/Aco1/Aco2/Gcsh/Mdh1/Dld
rno04115	p53 signaling pathway	70	-0.249456	-0.761692	0.84447	0.918739	0.625426	2917	tags=23%, list=17%, signal=19%	64044/246097/83628/25112/114851/24484/100362121/24617/686781/25310/317673/314856/170824/64625/681314/29157	Casp8/Fas/Cd82/Gadd45a/Cdkn1a/Igfbp3/Ddb2/Serpine1/Ppp1r13l/Cyct/Bbc3/Mdm2/Steap3/Bid/Bax-ps2/Ccng2
rno04152	AMPK signaling pathway	117	-0.242601	-0.78862	0.848649	0.920288	0.62648	4088	tags=25%, list=24%, signal=19%	65152/116636/24362/83792/295052/25520/24255/314638/84021/29565/29184/83506/499358/366508/25139/117256/360827/83516/25623/116719/24536/294515/117276/64562/25741/291541/690987/60416/29412	Pfkm/Eif4ebp1/Fbp1/Scd2/Ccna1/Prkag1/Cftr/Creb3l3/Irs3/Eef2/Cd36/Camkk2/Scd4/Pik3cd/Slc2a4/Ppp2r2c/Ulk1/Ppargc1a/Gys2/Acacb/Lepr/Foxo3/Pfkfb3/Prkab2/Pfkl/Cidea/Gys1/Pfkp/Adra1a
rno04730	Long-term depression	57	-0.25093	-0.745655	0.855436	0.922618	0.628066	2446	tags=21%, list=14%, signal=18%	25398/311341/24681/25023/50592/25679/303634/50664/114207/691907/25740/24414	Cacna1a/Pla2g4b/Prkcg/Prkcb/Gria1/Itpr3/Gna13/Gnao1/Ryr1/Pla2g4f/Gnaz/Grm1
rno03018	RNA degradation	77	-0.244744	-0.75316	0.856322	0.922618	0.628066	1517	tags=9%, list=9%, signal=8%	292295/24333/29618/25741/29619/60416/24334	Pabpc6/Eno1/Btg1/Pfkl/Btg2/Pfkp/Eno2
rno05212	Pancreatic cancer	74	-0.242643	-0.746552	0.867968	0.93172	0.634263	3495	tags=16%, list=20%, signal=13%	25631/684111/25112/114851/100362121/366508/116546/25272/24827/366957/681314/83785	Smad3/E2f2/Gadd45a/Cdkn1a/Ddb2/Pik3cd/Ralb/Mapk10/Tgfa/Rac2/Bax-ps2/Vegfa
rno04070	Phosphatidylinositol signaling system	92	-0.238796	-0.754399	0.870349	0.93172	0.634263	3755	tags=21%, list=22%, signal=16%	140866/24655/83523/312634/367745/81925/29337/24681/114101/25023/25679/366508/306490/54259/309419/171458/500709/81677/497197	Dgka/Plcd1/Impa1/Mtmr14/Dgkk/Cds1/Plcg2/Prkcg/Cds2/Prkcb/Itpr3/Pik3cd/Mtmr7/Inpp5d/Pip5k1b/Ipmk/Itpk1/Itpka/Plcz1
rno05221	Acute myeloid leukemia	62	-0.244159	-0.730783	0.876941	0.932799	0.634997	4251	tags=26%, list=24%, signal=20%	170929/170851/116636/116663/25682/295052/24918/24705/60350/81679/161452/366508/140635/317366/25021/116630	Bcl2a1/Map2k1/Eif4ebp1/Dusp6/Ppard/Ccna1/Stat5a/Rara/Cd14/Jup/Lef1/Pik3cd/Flt3/Pim2/Itgam/Csf2
rno04136	Autophagy - other	31	-0.266618	-0.714215	0.876943	0.932799	0.634997	1444	tags=6%, list=8%, signal=6%	689161/499973	Gabarapl1/Atg9b
rno00062	Fatty acid elongation	28	0.231628	0.74308	0.880342	0.933442	0.635435	1112	tags=14%, list=6%, signal=13%	171402/498728/680115/29470	Elovl6/Elovl2/Hacd1/Mecr
rno04261	Adrenergic signaling in cardiomyocytes	140	-0.235473	-0.771257	0.88961	0.940284	0.640093	2714	tags=16%, list=16%, signal=14%	29248/24180/24213/25400/64532/360718/24214/84396/29241/117256/140725/29686/315611/59326/29716/25665/29639/140729/64155/24585/29412/29513/24925	Tnni3/Agtr1a/Atp1a3/Camk2a/Adcy5/Popdc2/Atp1b2/Atp1b4/Adcy8/Ppp2r2c/Cacng4/Scn1b/Scn4b/Rapgef3/Cacna1d/Scn5a/Fxyd2/Cacng8/Scn7a/Myl3/Adra1a/Mapk13/Adrb1
rno00100	Steroid biosynthesis	20	-0.264077	-0.644147	0.904959	0.95349	0.649082	3351	tags=25%, list=19%, signal=20%	24254/81782/361631/114700/25279	Cel/Soat1/Cyp2r1/Cyp27b1/Cyp24a1
rno04714	Thermogenesis	215	0.193454	0.902323	0.916617	0.960977	0.654179	4831	tags=36%, list=28%, signal=26%	301518/78975/310616/26203/317203/54286/26202/26199/362495/81822/314441/25248/64226/298377/56718/114024/26192/26201/50545/26193/29754/361925/26198/26200/300047/287876/689314/117269/301458/100361934/60352/301020/83840/171379/26194/282546/296086/65248/293621/56769/302950/297990/293652/295923/293991/289217/293655/299739/94340/288088/100366024/298400/367858/287871/501560/293453/25282/81728/497902/2916…	Prkag3/Prkaa2/Creb3l4/ND6/Rps6ka6/Prkg1/ND5/ND3/Ndufaf4/Actb/Slc25a29/Cnr1/Mlst8/Coa7/Mtor/Acsl3/CYTB/ND4/Dpf1/ND1/Atp5mc1/Actl6a/COX2/ND4L/Cyc1/Actg1/Mapk11/Rps6ka2/Ndufs1/Ndufb4l4/Mapk12/Smarcc1/Rps6kb1/Smarca4/ND2/Arid1b/Ndufaf1/Prkaa1/Hras/Ndufaf3/Adcy9/Ndufb6/Ndufs8/Ndufs3/Ndufb8/Sdhc/Ndufv1/Ndufa12/Acsl5/Ndufb4/Prdm16/Creb3/Hrasl1/Rptor/Rps6ka3/Ndufab1/Cox6a1/Ndufv2/Uqcrq/Ndufa2/Bmp8a/Adcy7…
rno00640	Propanoate metabolism	31	-0.245333	-0.657197	0.919689	0.960977	0.654179	1354	tags=29%, list=8%, signal=27%	140547/293829/25244/311569/64304/369018/116719/24533/29634	Echs1/Mcee/Bckdha/Acss2/Acads/Ldhal6b/Acacb/Ldha/Ldhc
rno05218	Melanoma	66	-0.228124	-0.688225	0.920897	0.960977	0.654179	4239	tags=27%, list=24%, signal=21%	170851/24842/29368/29348/25094/684111/66017/54250/25112/114851/25444/25267/100362121/366508/314856/170583/83502/681314	Map2k1/Tp53/Fgf17/Fgf7/Mitf/E2f2/Fgf20/Fgf2/Gadd45a/Cdkn1a/Fgf9/Pdgfra/Ddb2/Pik3cd/Mdm2/Fgf23/Cdh1/Bax-ps2
rno05226	Gastric cancer	134	-0.226366	-0.740818	0.923574	0.960977	0.654179	3579	tags=22%, list=21%, signal=17%	29348/25631/684111/314612/66017/54250/25112/282582/114851/25444/100362121/114858/81679/161452/366508/140584/293649/24572/24881/83571/170583/316526/83502/170913/24646/679845/84426/681314/315294	Fgf7/Smad3/E2f2/Shc2/Fgf20/Fgf2/Gadd45a/Wnt5b/Cdkn1a/Fgf9/Ddb2/Shc3/Jup/Lef1/Pik3cd/Wnt11/Lrp5/Muc2/Wnt1/Cdkn1b/Fgf23/Wnt6/Cdh1/Abcb1a/Abcb1b/Shc4/Wnt4/Bax-ps2/Wnt10b
rno05213	Endometrial cancer	58	-0.22509	-0.669802	0.933094	0.967868	0.65887	2917	tags=14%, list=17%, signal=12%	25112/114851/100362121/161452/366508/294515/83502/681314	Gadd45a/Cdkn1a/Ddb2/Lef1/Pik3cd/Foxo3/Cdh1/Bax-ps2
rno05016	Huntington disease	289	-0.222938	-0.765686	0.940223	0.972243	0.661848	2127	tags=9%, list=12%, signal=8%	24408/50592/499512/314906/316226/360827/25272/679312/24787/83516/29213/25310/690288/317673/257648/287845/29326/207117/29482/681314/29430/500442/84683/56083/500377/100362331	Grin1/Gria1/Atp5mc2l2/Kif5a/Klc4/Ulk1/Mapk10/Tubb1/Sod2/Ppargc1a/Tubb4a/Cyct/Dnah14/Bbc3/Cacna1b/Dnah17/Gpx2/Dnah8/Slc1a2/Bax-ps2/Hap1/Dnai1/Cox4i2/Tgm2/Tuba8/Ndufa4l2
rno00053	Ascorbate and aldarate metabolism	16	-0.253778	-0.59198	0.951253	0.980613	0.667546	2122	tags=25%, list=12%, signal=22%	24861/691018/83472/252899	Ugt1a1/Hsd17b14/Ugdh/Miox
rno04140	Autophagy - animal	158	-0.205468	-0.681277	0.961864	0.988501	0.672916	4304	tags=19%, list=25%, signal=14%	361568/498013/170851/300799/100912032/64862/360682/25482/499670/84021/171293/308865/312634/58845/501854/299188/113894/83506/50522/170538/366508/246294/360827/25272/689161/306722/140942/84480/297960/499973	Rras/Ern1/Map2k1/Dapk2/Rps27a/Map1lc3b/Wdr45b/Mras/Nrbf2l1/Irs3/Ctsd/Atg16l2/Mtmr14/Igbp1/Rab7b/Zfyve1/Sqstm1/Camkk2/Ubc/Prkcd/Pik3cd/Optn/Ulk1/Mapk10/Gabarapl1/Dapk1/Ddit4/Bnip3/Rragd/Atg9b
rno00280	Valine, leucine and isoleucine degradation	51	0.191086	0.717773	0.972067	0.99392	0.676605	5369	tags=43%, list=31%, signal=30%	65984/81632/308100/690163/63938/29637/29611/361884/29711/501072/367196/298942/64203/298079/291450/65183/687008/24513/29592/171142/25618/25014	Aacs/Abat/Acat2/Oxct1/Hibadh/Hmgcs1/Dbt/Mccc2/Bckdhb/Acaa1b/Acad8/Dld/Bcat2/Aldh1b1/Aldh7a1/Aldh3a2/Pcca/Ivd/Bcat1/Ehhadh/Acadsb/Acat1
rno04072	Phospholipase D signaling pathway	138	-0.203664	-0.66799	0.973089	0.99392	0.676605	2366	tags=27%, list=14%, signal=23%	116691/361076/25738/498609/361568/85385/170851/170897/25482/140866/60427/691905/314612/367745/24418/29337/24180/64532/25267/311341/170919/114858/140694/24417/366508/29241/116546/303634/60590/59326/309419/246115/691907/29251/679845/24414/25155	Cyth1/Dgkh/Plcg1/Lpar2/Rras/Shc1/Map2k1/Sphk1/Mras/Dgka/Kitlg/Pla2g4d/Shc2/Dgkk/Grm5/Plcg2/Agtr1a/Adcy5/Pdgfra/Pla2g4b/Agpat4/Shc3/Dnm1/Grm4/Pik3cd/Adcy8/Ralb/Gna13/Grm8/Rapgef3/Pip5k1b/Plpp2/Pla2g4f/F2/Shc4/Grm1/Syk
rno00310	Lysine degradation	63	-0.202465	-0.606302	0.97852	0.995609	0.677755	3542	tags=14%, list=20%, signal=11%	64564/498295/311968/300901/303547/116552/365155/29416/289081	Bbox1/Smyd3/Kmt2e/Plod2/Ezh1/Plod1/Prdm9/Aadat/Colgalt2
rno04211	Longevity regulating pathway	85	-0.199171	-0.620722	0.982935	0.995609	0.677755	2592	tags=14%, list=15%, signal=12%	83506/64532/25050/366508/29241/360827/24248/24787/83516/294515/64562/681314	Camkk2/Adcy5/Camk4/Pik3cd/Adcy8/Ulk1/Cat/Sod2/Ppargc1a/Foxo3/Prkab2/Bax-ps2
rno04916	Melanogenesis	88	-0.196171	-0.615719	0.984163	0.995609	0.677755	2728	tags=15%, list=16%, signal=13%	282582/25400/64532/24681/161452/25023/140584/29241/50664/24881/316526/84426/315294	Wnt5b/Camk2a/Adcy5/Prkcg/Lef1/Prkcb/Wnt11/Adcy8/Gnao1/Wnt1/Wnt6/Wnt4/Wnt10b
rno04130	SNARE interactions in vesicular transport	33	0.185172	0.626776	0.986667	0.995609	0.677755	14145	tags=100%, list=82%, signal=19%	102557303/64154/64351/116500/360953/83730/362283/59074/65277/64630/100359512/252853/310710/85491/29528/25624/29631/60466/25130/292483/54400/81803/65134/24803/60562/81802/290627/116470/24923/685180/364033/140932/103690878	Vamp9/Gosr2/Ykt6/Snap29/Stx18/Vamp8/Stx16/Stx8/Vti1a/Snap23/Vti1b/Stx17/Sec22b/Vamp7/Vamp3/Vamp1/Bet1/Stx7/Stx2/Stx11/Bet1l/Stx4/Stx5/Vamp2/Stx6/Stx3/Use1/Stx1a/Stx1b/Stx19/Vamp4/Bnip1/LOC103690878
rno04120	Ubiquitin mediated proteolysis	137	-0.19168	-0.627776	0.993528	0.996815	0.678576	2601	tags=11%, list=15%, signal=9%	301000/50522/306004/100362121/24874/500511/309722/295704/85273/314856/89829/116667/103691088/78971/294328	Uba7/Ubc/Rhobtb2/Ddb2/Vhl/Ube2u/Rhobtb1/Ube2l6/Fbxo2/Mdm2/Socs3/Map3k1/Elocl1/Birc3/Aire
rno03250	Viral life cycle - HIV-1	57	-0.190252	-0.565346	0.994026	0.996815	0.678576	1188	tags=7%, list=7%, signal=7%	114510/60628/378947/306347	Mllt3/Cxcr4/Bst2/Ell
rno04141	Protein processing in endoplasmic reticulum	159	-0.181812	-0.602392	0.996815	0.996815	0.678576	1799	tags=6%, list=10%, signal=5%	25506/25272/29467/85273/24472/300743/681314/24273/171562	P4hb/Mapk10/Ddit3/Fbxo2/Hspa1a/Lman1l/Bax-ps2/Cryaa/Ero1a
