# Supplementary material for: Dental Follicle Mesenchymal Stem Cell-Derived Exosomes Mitigate Temporomandibular Joint Osteoarthritis in an In Vitro Model via the miR-146a-5p/Traf6/NF-κB Axis
Source: Research Square preprint supplement (doi:10.21203/rs.3.rs-8341412/v1), 2025-12-19
Supplement: Supplementary file 8 [file cf76cb335adf6cf9731d409a.xlsx]

## Sheet: Model vs Control
Gene_name	baseMean	log2FoldChange	lfcSE	stat	pvalue	padj	ID	Significant	Regulation	log_padj	1/lfcSE
Abca4	223.638	5.64835	0.298465	18.9247	7.13816e-80	4.83973e-78	ENSRNOG00000012892	Significant	Upregulated	79.1464	3.35048
Abcc9	9.58097	-3.36006	0.878859	-3.82321	0.000131727	0.00039199	ENSRNOG00000036960	Significant	Downregulated	3.88033	1.13784
Abhd15	28.6381	3.36618	0.506512	6.64581	3.01561e-11	1.84137e-10	ENSRNOG00000015002	Significant	Upregulated	10.5206	1.97429
Acap1	32.7148	5.92231	0.704204	8.40993	4.10242e-17	3.84808e-16	ENSRNOG00000015674	Significant	Upregulated	16.387	1.42004
Acot1	7.53441	3.51689	0.879879	3.99701	6.41475e-05	0.000203055	ENSRNOG00000055221	Significant	Upregulated	4.19282	1.13652
Acp5	445.22	4.09369	0.155643	26.3017	1.83345e-152	3.74482e-150	ENSRNOG00000046261	Significant	Upregulated	151.737	6.42494
Acta1	54.0234	-3.24131	0.403974	-8.02357	1.02717e-15	8.88041e-15	ENSRNOG00000017786	Significant	Downregulated	14.9884	2.47541
Acta2	57428.8	-3.59555	0.18753	-19.1732	6.19252e-82	4.45753e-80	ENSRNOG00000058039	Significant	Downregulated	81.2081	5.33249
Actg2	1079.59	-3.72335	0.127154	-29.2822	1.74809e-188	5.01118e-186	ENSRNOG00000029401	Significant	Downregulated	187.757	7.86447
Actrt3	2.84995	4.57844	1.52254	3.00711	0.00263747	0.00634608	ENSRNOG00000027908	Significant	Upregulated	2.57881	0.656797
Adamts15	235.771	-3.08025	0.192387	-16.0107	1.07613e-57	4.77824e-56	ENSRNOG00000009892	Significant	Downregulated	56.9681	5.19786
Adcyap1r1	10.1383	4.51416	1.00146	4.50759	6.55676e-06	2.34146e-05	ENSRNOG00000012098	Significant	Upregulated	5.18331	0.998544
Adgre1	3.01248	5.74395	1.59284	3.60611	0.000310825	0.000872811	ENSRNOG00000046254	Significant	Upregulated	3.50748	0.62781
Adgrv1	4.31943	3.22001	1.02686	3.13579	0.00171393	0.00425425	ENSRNOG00000016306	Significant	Upregulated	2.76601	0.973844
Adh1c	32.6281	7.29716	1.07059	6.81599	9.36162e-12	5.95673e-11	ENSRNOG00000012436	Significant	Upregulated	11.0286	0.934061
Adh6	32.6281	7.29716	1.07059	6.81599	9.36162e-12	5.95673e-11	ENSRNOG00000069176	Significant	Upregulated	11.0286	0.934061
Adh7	524.301	3.5326	0.20944	16.8669	7.88137e-64	3.99943e-62	ENSRNOG00000032959	Significant	Upregulated	63.1034	4.77464
Adm	408.621	5.79868	0.234445	24.7336	4.65408e-135	7.75996e-133	ENSRNOG00000027030	Significant	Upregulated	134.332	4.26538
Adora2a	4.61088	4.32812	1.27587	3.3923	0.000693091	0.00183486	ENSRNOG00000001302	Significant	Upregulated	3.15921	0.783782
Adrb3	18.4848	3.49202	0.543941	6.41984	1.36417e-10	7.8626e-10	ENSRNOG00000012674	Significant	Upregulated	9.86513	1.83843
Adss1	4.33274	5.0312	1.44164	3.48991	0.000483182	0.00131565	ENSRNOG00000046763	Significant	Upregulated	3.31589	0.693653
Ak4	1086.74	4.56859	0.177324	25.7641	2.24189e-146	4.41355e-144	ENSRNOG00000045738	Significant	Upregulated	145.649	5.63939
Akr1b10	5.14058	3.22667	0.993744	3.24698	0.00116635	0.00297274	ENSRNOG00000009734	Significant	Upregulated	2.93317	1.0063
Akr1b8	799.28	5.14387	0.22353	23.012	3.53572e-117	4.44413e-115	ENSRNOG00000027433	Significant	Upregulated	116.452	4.47367
Akr1c15	28.4881	5.22967	0.667076	7.83969	4.5167e-15	3.71242e-14	ENSRNOG00000021735	Significant	Upregulated	14.3452	1.49908
Akr1c19	4.83238	3.60495	1.12927	3.19228	0.00141154	0.00355333	ENSRNOG00000038319	Significant	Upregulated	2.85031	0.885526
Aldh3a1	123.619	3.68086	0.624494	5.89415	3.76609e-09	1.93151e-08	ENSRNOG00000002331	Significant	Upregulated	8.42411	1.6013
Aldoc	963.977	4.78655	0.145605	32.8736	5.23844e-237	2.19477e-234	ENSRNOG00000011452	Significant	Upregulated	236.281	6.86792
Amn	18.0677	5.80806	0.947744	6.1283	8.88214e-10	4.77258e-09	ENSRNOG00000009050	Significant	Upregulated	9.05148	1.05514
Angptl4	284.676	4.36073	0.223243	19.5336	5.69089e-85	4.40707e-83	ENSRNOG00000007545	Significant	Upregulated	84.2448	4.47943
Angptl8	10.5475	4.24965	0.803389	5.28965	1.22551e-07	5.34995e-07	ENSRNOG00000011490	Significant	Upregulated	6.91168	1.24473
Ankdd1a	19.4609	3.07217	0.492812	6.23397	4.5477e-10	2.50032e-09	ENSRNOG00000015554	Significant	Upregulated	9.34221	2.02917
Ankrd1	7.82602	-4.11387	1.21047	-3.39856	0.000677415	0.00179604	ENSRNOG00000018598	Significant	Downregulated	3.16914	0.826122
Ankrd35	9.49352	5.5172	1.17405	4.69928	2.61082e-06	9.82061e-06	ENSRNOG00000025108	Significant	Upregulated	5.58322	0.85175
Ankrd37	248.585	5.38141	0.313319	17.1755	4.05231e-66	2.14983e-64	ENSRNOG00000031335	Significant	Upregulated	65.3923	3.19163
Ano1	11.8624	3.17056	0.792796	3.99921	6.3554e-05	0.000201254	ENSRNOG00000020865	Significant	Upregulated	4.19686	1.26136
Anpep	663.062	3.0959	0.119405	25.9278	3.23836e-148	6.45303e-146	ENSRNOG00000014610	Significant	Upregulated	147.49	8.37488
Aox1	419.722	3.47132	0.174658	19.8749	6.70612e-88	5.45164e-86	ENSRNOG00000015354	Significant	Upregulated	87.1735	5.72547
Aph1b	244.837	5.56473	0.304588	18.2697	1.44314e-74	8.89846e-73	ENSRNOG00000027295	Significant	Upregulated	73.8407	3.28312
Apln	460.978	4.60268	0.219637	20.9559	1.658e-97	1.60306e-95	ENSRNOG00000003984	Significant	Upregulated	96.7804	4.55297
Apol7al1	77.8565	3.50654	0.295217	11.8778	1.54311e-32	3.22435e-31	ENSRNOG00000052981	Significant	Upregulated	31.8116	3.38734
Arhgdib	30.3508	4.75437	0.572096	8.31045	9.53404e-17	8.75695e-16	ENSRNOG00000005809	Significant	Upregulated	16.0207	1.74796
Armh4	808.526	3.37953	0.185226	18.2454	2.25147e-74	1.38305e-72	ENSRNOG00000031849	Significant	Upregulated	73.6475	5.3988
Arrdc4	670.705	3.17671	0.197865	16.0549	5.28096e-58	2.36413e-56	ENSRNOG00000010775	Significant	Upregulated	57.2773	5.05395
Ass1	544.045	9.05397	0.467672	19.3597	1.68935e-83	1.27207e-81	ENSRNOG00000008837	Significant	Upregulated	82.7723	2.13825
Atg9b	4.03639	5.12766	1.4381	3.56559	0.000363038	0.00100937	ENSRNOG00000023449	Significant	Upregulated	3.44005	0.695364
Atp7b	82.2	4.75398	0.403177	11.7913	4.32757e-32	8.82803e-31	ENSRNOG00000012878	Significant	Upregulated	31.3638	2.4803
B3gnt3	3.67402	6.02589	1.50103	4.01449	5.95739e-05	0.000189422	ENSRNOG00000018764	Significant	Upregulated	4.22494	0.666207
B3gnt6	5.37813	3.43091	1.05629	3.24809	0.00116183	0.00296306	ENSRNOG00000014471	Significant	Upregulated	2.93486	0.946713
Batf	3.67381	5.98825	1.48469	4.03334	5.49888e-05	0.000175663	ENSRNOG00000008588	Significant	Upregulated	4.25973	0.673543
Bcl3	160.787	5.12019	0.298776	17.1372	7.82685e-66	4.12551e-64	ENSRNOG00000043416	Significant	Upregulated	65.1064	3.34699
Bdkrb1	32.8805	4.01838	0.47245	8.50541	1.80956e-17	1.72913e-16	ENSRNOG00000004488	Significant	Upregulated	16.7424	2.11663
Bdkrb2	146.549	3.91444	0.301062	13.0021	1.19022e-38	3.07725e-37	ENSRNOG00000047300	Significant	Upregulated	37.9244	3.32157
Bend5	62.0566	3.24487	0.366281	8.85896	8.07642e-19	8.38429e-18	ENSRNOG00000008025	Significant	Upregulated	18.0928	2.73014
Bhlhe40	3386.83	3.10317	0.110424	28.1024	9.16787e-174	2.30466e-171	ENSRNOG00000007152	Significant	Upregulated	173.038	9.05601
Bik	3.01695	5.74536	1.67337	3.4334	0.000596066	0.00159798	ENSRNOG00000010359	Significant	Upregulated	3.22471	0.597595
Birc3	69.1087	3.32708	0.455214	7.30883	2.69487e-13	1.94842e-12	ENSRNOG00000005731	Significant	Upregulated	12.5695	2.19677
Bnip3	6157.74	4.7163	0.0820466	57.4832	1e-300	1e-300	ENSRNOG00000017243	Significant	Upregulated	300	12.1882
C10h16orf89	23.4844	8.69572	1.25113	6.95029	3.64541e-12	2.39413e-11	ENSRNOG00000021796	Significant	Upregulated	11.4383	0.799277
C1ql4	22.8972	5.18028	0.691457	7.49184	6.7915e-14	5.11633e-13	ENSRNOG00000060020	Significant	Upregulated	13.168	1.44622
C1s	1675.54	4.51742	0.0922304	48.9797	1e-300	1e-300	ENSRNOG00000011971	Significant	Upregulated	300	10.8424
C3	806.816	10.9505	0.732467	14.9501	1.55491e-50	5.72235e-49	ENSRNOG00000046834	Significant	Upregulated	49.8083	1.36525
C3h15orf48	23.5739	6.18013	0.946414	6.53005	6.57478e-11	3.90519e-10	ENSRNOG00000067060	Significant	Upregulated	10.1821	1.05662
C7h12orf56	3.41207	3.82322	1.31049	2.91739	0.00352973	0.00830345	ENSRNOG00000023824	Significant	Upregulated	2.45226	0.763072
C8h11orf87	12.1994	-4.17431	0.962126	-4.33863	1.43371e-05	4.92781e-05	ENSRNOG00000025463	Significant	Downregulated	4.84354	1.03937
Cacna1h	159.426	4.17043	0.219801	18.9737	2.81248e-80	1.93907e-78	ENSRNOG00000033893	Significant	Upregulated	79.5509	4.54958
Cacna1i	71.0285	3.09634	0.283086	10.9378	7.60189e-28	1.32143e-26	ENSRNOG00000060407	Significant	Upregulated	27.1191	3.5325
Camk1g	9.09679	6.34482	1.35132	4.69528	2.66239e-06	1.00031e-05	ENSRNOG00000006470	Significant	Upregulated	5.57473	0.740018
Car12	1193.79	10.0525	0.445551	22.5618	1.02743e-112	1.23443e-110	ENSRNOG00000017766	Significant	Upregulated	111.988	2.24441
Car3	290.086	-5.0766	0.266807	-19.0272	1.01506e-80	7.08808e-79	ENSRNOG00000010079	Significant	Downregulated	79.9935	3.74802
Car9	2223.81	4.24834	0.0972349	43.6915	1e-300	1e-300	ENSRNOG00000017073	Significant	Upregulated	300	10.2844
Card10	13.871	3.26433	0.730892	4.46622	7.9612e-06	2.81694e-05	ENSRNOG00000008401	Significant	Upregulated	5.09902	1.36819
Cbfa2t3	2.70246	5.52115	1.59144	3.46929	0.000521836	0.00141571	ENSRNOG00000014723	Significant	Upregulated	3.28247	0.628364
Ccdc181	201.703	3.00975	0.193555	15.5498	1.59594e-54	6.61871e-53	ENSRNOG00000002860	Significant	Upregulated	53.797	5.16648
Ccdc3	941.349	-3.57543	0.34929	-10.2363	1.36392e-24	1.97225e-23	ENSRNOG00000017933	Significant	Downregulated	23.8652	2.86295
Ccdc88c	16.3045	3.51654	0.72756	4.83333	1.34266e-06	5.21613e-06	ENSRNOG00000004482	Significant	Upregulated	5.87203	1.37446
Ccl2	288.734	8.65154	0.585316	14.781	1.94332e-49	6.84351e-48	ENSRNOG00000007159	Significant	Upregulated	48.7115	1.70848
Ccl20	396.938	3.39139	0.429762	7.89132	2.98997e-15	2.49393e-14	ENSRNOG00000015992	Significant	Upregulated	14.5243	2.32687
Ccl3	3.26667	5.85976	1.60262	3.65637	0.000255815	0.000727846	ENSRNOG00000011205	Significant	Upregulated	3.59207	0.623979
Ccl4	4.07068	6.17786	1.48163	4.16964	3.05076e-05	0.000100808	ENSRNOG00000011406	Significant	Upregulated	4.51559	0.674933
Ccl5	4.81186	6.42311	1.6015	4.01068	6.05434e-05	0.000192392	ENSRNOG00000010906	Significant	Upregulated	4.21793	0.624415
Ccl7	84.0946	8.09705	0.902158	8.9752	2.82828e-19	3.00873e-18	ENSRNOG00000000239	Significant	Upregulated	18.5485	1.10845
Ccng2	1776.7	3.71909	0.095559	38.9193	1e-300	1e-300	ENSRNOG00000002089	Significant	Upregulated	300	10.4647
Cd28	41.7372	3.2911	0.381179	8.634	5.92412e-18	5.83133e-17	ENSRNOG00000010283	Significant	Upregulated	17.2274	2.62344
Cd40	22.9871	8.66003	1.26026	6.8716	6.34861e-12	4.09539e-11	ENSRNOG00000018488	Significant	Upregulated	11.1973	0.793484
Cd69	3.54767	5.97578	1.51529	3.94367	8.02453e-05	0.000246375	ENSRNOG00000056783	Significant	Upregulated	4.09558	0.659942
Cda	75.325	4.35779	0.373265	11.6748	1.71504e-31	3.44273e-30	ENSRNOG00000015677	Significant	Upregulated	30.7657	2.67906
Cdh18	13.0665	-3.77036	0.870453	-4.33149	1.48104e-05	5.07663e-05	ENSRNOG00000010535	Significant	Downregulated	4.82943	1.14883
Cdh6	3.14005	-4.36076	1.48504	-2.93647	0.00331974	0.0078422	ENSRNOG00000013535	Significant	Downregulated	2.4789	0.673384
Cebpd	602.36	3.32708	0.242135	13.7406	5.80142e-43	1.7142e-41	ENSRNOG00000050869	Significant	Upregulated	42.2365	4.12992
Cers3	6.36746	4.91181	1.20817	4.06549	4.79318e-05	0.000154326	ENSRNOG00000013823	Significant	Upregulated	4.31938	0.827696
Ces1a	11.2053	7.60783	1.30915	5.81128	6.19965e-09	3.11412e-08	ENSRNOG00000039725	Significant	Upregulated	8.20763	0.763855
Chi3l1	51.852	4.88839	0.460326	10.6194	2.42134e-26	3.9057e-25	ENSRNOG00000053272	Significant	Upregulated	25.6159	2.17237
Chrna4	4.61119	4.0848	1.26981	3.21686	0.00129602	0.00328123	ENSRNOG00000011202	Significant	Upregulated	2.88739	0.787519
Cidea	28.7535	3.24627	0.441858	7.34686	2.02914e-13	1.48284e-12	ENSRNOG00000018505	Significant	Upregulated	12.6927	2.26317
Cimap2	8.66591	4.77556	1.10656	4.31569	1.59108e-05	5.42987e-05	ENSRNOG00000030914	Significant	Upregulated	4.79831	0.903702
Ckmt1	2.97699	5.72144	1.58315	3.61397	0.000301544	0.000848498	ENSRNOG00000014573	Significant	Upregulated	3.52065	0.631654
Cldn1	197.095	5.82372	0.331331	17.5768	3.71186e-69	2.07003e-67	ENSRNOG00000001926	Significant	Upregulated	68.4304	3.01813
Clec2d2	12.1702	3.0415	0.811904	3.74614	0.000179577	0.000522486	ENSRNOG00000059890	Significant	Upregulated	3.74575	1.23167
Clstn3	36.2098	4.55257	0.535967	8.49412	1.99441e-17	1.90022e-16	ENSRNOG00000011156	Significant	Upregulated	16.7002	1.86579
Cmah	6.07171	6.72132	1.49602	4.49281	7.02893e-06	2.50333e-05	ENSRNOG00000003094	Significant	Upregulated	5.15311	0.668442
Cnn1	2133.26	-3.39759	0.35035	-9.69772	3.08297e-22	3.94794e-21	ENSRNOG00000027736	Significant	Downregulated	21.511	2.85429
Cntfr	13.8121	3.54653	0.613376	5.78198	7.38255e-09	3.67665e-08	ENSRNOG00000047307	Significant	Upregulated	8.13179	1.63032
Col19a1	13.9175	-3.17323	0.801193	-3.96063	7.47517e-05	0.000231301	ENSRNOG00000012759	Significant	Downregulated	4.12638	1.24814
Col22a1	8.83137	3.69202	0.885997	4.16708	3.08525e-05	0.000101824	ENSRNOG00000024824	Significant	Upregulated	4.51071	1.12867
Colgalt2	231.224	3.64928	0.204692	17.8282	4.27318e-71	2.47602e-69	ENSRNOG00000028207	Significant	Upregulated	70.3692	4.88539
Coro1a	19.6872	3.00446	0.509786	5.89358	3.77926e-09	1.93766e-08	ENSRNOG00000019430	Significant	Upregulated	8.42259	1.96161
Cox4i2	918.233	4.96127	0.134723	36.8258	7.12982e-297	5.06527e-294	ENSRNOG00000007827	Significant	Upregulated	296.147	7.42266
Cpne5	13.758	5.03402	0.87826	5.7318	9.93675e-09	4.88614e-08	ENSRNOG00000000522	Significant	Upregulated	8.00276	1.13861
Creg2	4.48567	4.28287	1.33532	3.20736	0.00133958	0.00338101	ENSRNOG00000013991	Significant	Upregulated	2.87303	0.748882
Crhr2	2.47309	5.45679	1.81747	3.00241	0.00267847	0.00643621	ENSRNOG00000011145	Significant	Upregulated	2.57211	0.550217
Crlf1	269.038	3.44689	0.196956	17.5008	1.41244e-68	7.74471e-67	ENSRNOG00000020030	Significant	Upregulated	67.85	5.07728
Csf2	3.51813	5.95972	1.58013	3.77167	0.000162158	0.000475019	ENSRNOG00000026805	Significant	Upregulated	3.79006	0.632861
Csf3	23.4808	8.70031	1.29219	6.73301	1.66186e-11	1.03565e-10	ENSRNOG00000008525	Significant	Upregulated	10.7794	0.773882
Cx3cl1	90.9882	3.3264	0.272387	12.212	2.68143e-34	5.98559e-33	ENSRNOG00000016326	Significant	Upregulated	33.5716	3.67125
Cxcl1	720.575	8.37228	0.691841	12.1014	1.03771e-33	2.28828e-32	ENSRNOG00000002802	Significant	Upregulated	32.9839	1.44542
Cxcl10	12.6128	4.92576	0.992858	4.96119	7.00622e-07	2.81559e-06	ENSRNOG00000022256	Significant	Upregulated	6.15452	1.00719
Cxcl14	13.9347	4.01761	0.84143	4.77474	1.79943e-06	6.89396e-06	ENSRNOG00000011984	Significant	Upregulated	5.74486	1.18845
Cxcl16	139.6	3.20634	0.215557	14.8747	4.81218e-50	1.74348e-48	ENSRNOG00000026647	Significant	Upregulated	49.3177	4.63915
Cxcl2	15.3362	8.09008	1.25906	6.4255	1.31433e-10	7.58952e-10	ENSRNOG00000002792	Significant	Upregulated	9.8813	0.794245
Cxcl3	30.4708	6.61673	0.896674	7.37919	1.59256e-13	1.17165e-12	ENSRNOG00000028043	Significant	Upregulated	12.7979	1.11523
Cxcl6	78.108	10.4385	1.6741	6.23527	4.5101e-10	2.48048e-09	ENSRNOG00000002843	Significant	Upregulated	9.34581	0.597336
Cxcr4	15.8291	4.15333	0.801486	5.18203	2.19483e-07	9.34432e-07	ENSRNOG00000003866	Significant	Upregulated	6.6586	1.24768
Cyp19a1	4.15732	5.11655	1.44635	3.53755	0.000403852	0.00111544	ENSRNOG00000000196	Significant	Upregulated	3.39378	0.691395
Cyp1a1	40.1089	5.23038	0.705029	7.41867	1.183e-13	8.78243e-13	ENSRNOG00000019500	Significant	Upregulated	12.927	1.41838
Cyp2c11	21.2893	-4.60252	0.820885	-5.60678	2.06123e-08	9.78232e-08	ENSRNOG00000052810	Significant	Downregulated	7.68587	1.2182
Cyp4b1	131.519	6.13856	0.439522	13.9665	2.49698e-44	7.66929e-43	ENSRNOG00000055078	Significant	Upregulated	43.6026	2.2752
Dab1	19.4848	-3.15177	0.61268	-5.14424	2.68605e-07	1.13148e-06	ENSRNOG00000007410	Significant	Downregulated	6.57089	1.63217
Dapk1	29.7811	3.54635	0.473079	7.49632	6.56369e-14	4.95384e-13	ENSRNOG00000018198	Significant	Upregulated	13.1829	2.11381
Dchs2	31.2997	4.18265	0.489998	8.53604	1.38896e-17	1.34135e-16	ENSRNOG00000047473	Significant	Upregulated	16.8573	2.04082
Dcx	156.467	-3.2203	0.247399	-13.0166	9.84597e-39	2.5537e-37	ENSRNOG00000047712	Significant	Downregulated	38.0067	4.04205
Ddit4	6312.5	3.5469	0.0982052	36.1172	1.21818e-285	7.37227e-283	ENSRNOG00000057078	Significant	Upregulated	284.914	10.1828
Des	6.96445	3.46832	0.853852	4.06197	4.86599e-05	0.000156486	ENSRNOG00000019810	Significant	Upregulated	4.31283	1.17116
Dhh	12.1746	3.01984	0.638854	4.72697	2.27898e-06	8.62603e-06	ENSRNOG00000053675	Significant	Upregulated	5.64226	1.5653
Dlgap2	5.38065	6.52024	1.45874	4.46978	7.82986e-06	2.77286e-05	ENSRNOG00000012573	Significant	Upregulated	5.10625	0.685524
Dmkn	4.68472	5.38032	1.4569	3.69299	0.000221629	0.000635807	ENSRNOG00000055934	Significant	Upregulated	3.65437	0.686389
Dmrt2	43.3755	-3.51556	0.435293	-8.0763	6.67591e-16	5.84276e-15	ENSRNOG00000016301	Significant	Downregulated	15.1755	2.2973
Dnase1l3	17.6579	-7.23105	1.2387	-5.83763	5.29488e-09	2.66703e-08	ENSRNOG00000009291	Significant	Downregulated	8.27614	0.8073
Doc2a	5.27517	3.84284	1.06009	3.62502	0.000288944	0.000815289	ENSRNOG00000019920	Significant	Upregulated	3.53919	0.943317
Dsc2	22.7138	3.5186	0.636805	5.5254	3.28743e-08	1.53169e-07	ENSRNOG00000039969	Significant	Upregulated	7.48314	1.57034
Dtx1	3.54048	5.96834	1.61025	3.70647	0.000210168	0.000605668	ENSRNOG00000050848	Significant	Upregulated	3.67743	0.621022
Dusp4	111.223	4.01162	0.291171	13.7776	3.47862e-43	1.04486e-41	ENSRNOG00000011921	Significant	Upregulated	42.4586	3.43441
Efcc1	6.66645	3.90857	1.01315	3.85783	0.000114399	0.000343997	ENSRNOG00000009787	Significant	Upregulated	3.94158	0.987018
Egln1	2738.75	3.74538	0.100871	37.1302	9.13729e-302	6.78651e-299	ENSRNOG00000063609	Significant	Upregulated	301.039	9.91362
Egln3	1215.77	10.958	0.667846	16.408	1.67597e-60	7.82439e-59	ENSRNOG00000005053	Significant	Upregulated	59.7757	1.49735
Eif4e3	188.513	3.17949	0.193503	16.4312	1.14286e-60	5.3662e-59	ENSRNOG00000010301	Significant	Upregulated	59.942	5.16789
Eno2	6376.35	3.69678	0.123512	29.9305	7.90411e-197	2.58306e-194	ENSRNOG00000013141	Significant	Upregulated	196.102	8.09636
Enpep	1149.11	3.95015	0.108452	36.4231	1.83256e-290	1.19776e-287	ENSRNOG00000051854	Significant	Upregulated	289.737	9.2207
Epb41l4b	10.6885	4.13163	0.841699	4.90868	9.16923e-07	3.62422e-06	ENSRNOG00000056550	Significant	Upregulated	6.03767	1.18807
Epn3	37.6363	3.58956	0.503959	7.12273	1.05807e-12	7.27644e-12	ENSRNOG00000003284	Significant	Upregulated	11.9755	1.98429
Epor	67.3772	5.12538	0.472415	10.8493	2.00955e-27	3.43115e-26	ENSRNOG00000012619	Significant	Upregulated	26.6969	2.11678
Eps8l2	14.0199	3.11099	0.58763	5.29413	1.19585e-07	5.2307e-07	ENSRNOG00000018336	Significant	Upregulated	6.92232	1.70175
Ero1a	22931.4	6.00002	0.0849321	70.6449	1e-300	1e-300	ENSRNOG00000006462	Significant	Upregulated	300	11.7741
Esrp2	5.04885	3.76901	1.20836	3.11912	0.00181393	0.00448339	ENSRNOG00000023177	Significant	Upregulated	2.74138	0.827569
Etnppl	28.1017	3.6553	0.471056	7.7598	8.50654e-15	6.87083e-14	ENSRNOG00000045743	Significant	Upregulated	14.0702	2.12289
Evpl	24.7026	3.02824	0.494674	6.12168	9.2591e-10	4.96696e-09	ENSRNOG00000009343	Significant	Upregulated	9.03343	2.02153
Faah	15.0843	5.09764	0.91511	5.57052	2.53976e-08	1.19561e-07	ENSRNOG00000045949	Significant	Upregulated	7.59521	1.09277
Fabp4	3.82802	5.90653	1.45692	4.05411	5.03246e-05	0.000161553	ENSRNOG00000010805	Significant	Upregulated	4.29822	0.686378
Fam13a	192.441	3.40274	0.204095	16.6723	2.08292e-62	1.02515e-60	ENSRNOG00000007947	Significant	Upregulated	61.6813	4.89968
Fam184b	15.9385	3.5365	0.634245	5.57592	2.46227e-08	1.16147e-07	ENSRNOG00000003704	Significant	Upregulated	7.60866	1.57668
Fam219a	895.872	3.21038	0.119405	26.8864	3.16422e-159	7.08264e-157	ENSRNOG00000039559	Significant	Upregulated	158.5	8.37484
Fam25a	4.82783	6.35102	1.40167	4.53102	5.86991e-06	2.10847e-05	ENSRNOG00000055025	Significant	Upregulated	5.23137	0.713432
Fam81a	139.658	-3.08769	0.23885	-12.9273	3.15581e-38	8.09511e-37	ENSRNOG00000057501	Significant	Downregulated	37.5009	4.18673
Fbxl21	155.17	3.91957	0.238127	16.46	7.11097e-61	3.36792e-59	ENSRNOG00000012168	Significant	Upregulated	60.1481	4.19944
Fcgr2a	54.1691	4.4935	0.401777	11.1841	4.87931e-29	8.89821e-28	ENSRNOG00000049422	Significant	Upregulated	28.3116	2.48895
Fcgr2al1	54.1691	4.4935	0.401777	11.1841	4.87931e-29	8.89821e-28	ENSRNOG00000046663	Significant	Upregulated	28.3116	2.48895
Fcho1	14.2505	6.9641	1.29678	5.37032	7.85989e-08	3.51479e-07	ENSRNOG00000033912	Significant	Upregulated	7.10458	0.771143
Ffar4	23.7861	7.74536	1.27293	6.08468	1.16726e-09	6.21676e-09	ENSRNOG00000021763	Significant	Upregulated	8.93283	0.78559
Fgf11	76.167	4.15408	0.345246	12.0322	2.40553e-33	5.23688e-32	ENSRNOG00000014882	Significant	Upregulated	32.6188	2.89649
Fgf16	12.9301	-3.3363	0.783061	-4.26059	2.03886e-05	6.88469e-05	ENSRNOG00000061530	Significant	Downregulated	4.69061	1.27704
Fhip1a	160.644	3.44181	0.200713	17.1479	6.5192e-66	3.44737e-64	ENSRNOG00000048256	Significant	Upregulated	65.1858	4.98223
Filip1	51.7002	-3.32667	0.411746	-8.07942	6.50746e-16	5.70756e-15	ENSRNOG00000011521	Significant	Downregulated	15.1866	2.42868
Fosl1	224.021	3.67669	0.17001	21.6263	1.01506e-103	1.07702e-101	ENSRNOG00000020552	Significant	Upregulated	102.994	5.88202
Foxo6	10.9375	4.61288	0.893937	5.16018	2.46714e-07	1.04465e-06	ENSRNOG00000032639	Significant	Upregulated	6.60781	1.11865
Frmd5	12.0098	3.58495	0.801916	4.47048	7.80453e-06	2.76509e-05	ENSRNOG00000016189	Significant	Upregulated	5.10765	1.24701
Frzb	46.2217	3.48407	0.403142	8.64229	5.5096e-18	5.43312e-17	ENSRNOG00000007765	Significant	Upregulated	17.2589	2.48051
Fst	886.427	-3.03846	0.109933	-27.6392	3.76724e-168	9.05245e-166	ENSRNOG00000011631	Significant	Downregulated	167.424	9.09642
Fth1	18684.4	3.25068	0.110311	29.4683	7.33858e-191	2.2206e-188	ENSRNOG00000022619	Significant	Upregulated	190.134	9.06527
G0s2	373.67	4.48337	0.200397	22.3725	7.29614e-111	8.63905e-109	ENSRNOG00000006019	Significant	Upregulated	110.137	4.9901
Gabrp	12.4011	-3.59155	0.861693	-4.16801	3.07264e-05	0.000101469	ENSRNOG00000032417	Significant	Downregulated	4.51249	1.16051
Gas7	531.591	4.33498	0.362998	11.9422	7.13347e-33	1.52367e-31	ENSRNOG00000049361	Significant	Upregulated	32.1467	2.75484
Gbe1	915.692	3.78779	0.0957711	39.5505	1e-300	1e-300	ENSRNOG00000051232	Significant	Upregulated	300	10.4416
Gbp7	32.0209	3.90027	0.477543	8.16737	3.15192e-16	2.8128e-15	ENSRNOG00000029191	Significant	Upregulated	15.5014	2.09405
Gch1	166.326	5.21013	0.292145	17.8341	3.84297e-71	2.24265e-69	ENSRNOG00000011039	Significant	Upregulated	70.4153	3.42296
Gdf5	2.44637	5.22923	1.52925	3.41946	0.000627446	0.0016736	ENSRNOG00000050123	Significant	Upregulated	3.20242	0.653913
Gdpd2	20.9488	3.32638	0.57562	5.77878	7.52461e-09	3.74056e-08	ENSRNOG00000002800	Significant	Upregulated	8.12352	1.73726
Gipr	34.9798	5.7934	0.677157	8.55547	1.17386e-17	1.13833e-16	ENSRNOG00000015860	Significant	Upregulated	16.9304	1.47676
Gnaz	3.25613	5.63267	1.51175	3.72593	0.000194596	0.000564177	ENSRNOG00000001313	Significant	Upregulated	3.71087	0.661485
Gng2	104.446	3.0712	0.239091	12.8453	9.14069e-38	2.33009e-36	ENSRNOG00000048980	Significant	Upregulated	37.039	4.18251
Gpat3	301.594	3.59755	0.200284	17.9623	3.84739e-72	2.30279e-70	ENSRNOG00000002159	Significant	Upregulated	71.4148	4.99292
Gpi	12619.5	3.22975	0.116655	27.6863	1.0196e-168	2.4866e-166	ENSRNOG00000023150	Significant	Upregulated	167.992	8.57228
Gpr146	117.361	5.24676	0.416444	12.599	2.1394e-36	5.15601e-35	ENSRNOG00000001288	Significant	Upregulated	35.6697	2.40129
Gpr68	20.2611	5.22716	0.869442	6.01209	1.83147e-09	9.61329e-09	ENSRNOG00000046309	Significant	Upregulated	8.7372	1.15016
Gria2	25.6482	-3.67435	0.608387	-6.0395	1.54591e-09	8.15109e-09	ENSRNOG00000054204	Significant	Downregulated	8.81081	1.64369
Grin1	3.54978	4.53618	1.46213	3.10243	0.00191936	0.00472395	ENSRNOG00000011726	Significant	Upregulated	2.71684	0.683932
Grin2c	4.54622	5.33699	1.44741	3.68728	0.000226668	0.000649441	ENSRNOG00000003280	Significant	Upregulated	3.64461	0.69089
Grk1	4.16154	6.20606	1.57845	3.93175	8.43298e-05	0.000258236	ENSRNOG00000018430	Significant	Upregulated	4.07402	0.633534
Grm1	7.25306	3.2899	1.07922	3.04841	0.00230053	0.00559467	ENSRNOG00000014290	Significant	Upregulated	2.63817	0.926599
Grpr	3.17969	-4.54394	1.51569	-2.99793	0.00271816	0.00652199	ENSRNOG00000004124	Significant	Downregulated	2.56572	0.659766
Gsap	301.626	5.49346	0.224018	24.5224	8.51429e-133	1.40529e-130	ENSRNOG00000028801	Significant	Upregulated	132.07	4.46393
Gsta1	351.299	3.52746	0.141081	25.0031	5.66127e-138	9.84097e-136	ENSRNOG00000013484	Significant	Upregulated	137.247	7.08812
Gucy1a1	71.4581	-3.56531	0.364458	-9.7825	1.33858e-22	1.75119e-21	ENSRNOG00000012302	Significant	Downregulated	21.8734	2.7438
Gucy1b1	33.5808	-3.11827	0.462554	-6.74141	1.56852e-11	9.79727e-11	ENSRNOG00000012060	Significant	Downregulated	10.8045	2.16191
Gucy2c	5.53099	3.1654	1.02129	3.0994	0.00193911	0.0047697	ENSRNOG00000009031	Significant	Upregulated	2.7124	0.979149
Hal	15.0118	3.85438	0.682776	5.64515	1.65034e-08	7.92901e-08	ENSRNOG00000004502	Significant	Upregulated	7.78243	1.46461
Hap1	114.645	3.53008	0.25424	13.8848	7.8278e-44	2.38187e-42	ENSRNOG00000014819	Significant	Upregulated	43.1064	3.93329
Hcar2	9.28445	7.3651	1.30331	5.65108	1.59441e-08	7.6716e-08	ENSRNOG00000026653	Significant	Upregulated	7.7974	0.767278
Hephl1	2.18937	5.27501	1.78401	2.95682	0.0031083	0.00737579	ENSRNOG00000056092	Significant	Upregulated	2.50748	0.560534
Hes3	13.9066	6.97535	1.28996	5.40742	6.3939e-08	2.8837e-07	ENSRNOG00000010893	Significant	Upregulated	7.19423	0.775218
Hey1	318.806	-3.9703	0.197274	-20.1259	4.3802e-90	3.70842e-88	ENSRNOG00000062882	Significant	Downregulated	89.3585	5.0691
Heyl	228.616	-5.45975	0.338987	-16.106	2.31368e-58	1.04435e-56	ENSRNOG00000015318	Significant	Downregulated	57.6357	2.94996
Hfm1	5.69259	3.25004	0.969561	3.35207	0.0008021	0.00210172	ENSRNOG00000023299	Significant	Upregulated	3.09577	1.03139
Higd1a	3158.71	4.36552	0.105258	41.4745	1e-300	1e-300	ENSRNOG00000019428	Significant	Upregulated	300	9.50047
Hk2	1944.89	3.56341	0.0968843	36.78	3.85162e-296	2.62231e-293	ENSRNOG00000006116	Significant	Upregulated	295.414	10.3216
Hk3	7.76528	4.57379	1.02183	4.47608	7.60246e-06	2.69701e-05	ENSRNOG00000026235	Significant	Upregulated	5.11905	0.978638
Hmcn2	3.04769	4.69323	1.50298	3.12262	0.00179251	0.00443244	ENSRNOG00000064166	Significant	Upregulated	2.74654	0.665345
Hmox1	4690.32	5.12582	0.119231	42.9905	1e-300	1e-300	ENSRNOG00000014117	Significant	Upregulated	300	8.38706
Hopx	171.838	3.60656	0.201125	17.9319	6.6504e-72	3.95155e-70	ENSRNOG00000024689	Significant	Upregulated	71.1772	4.97202
Hpse	203.882	5.06845	0.30858	16.4251	1.2646e-60	5.92078e-59	ENSRNOG00000002188	Significant	Upregulated	59.898	3.24065
Hsd11b1	938.908	5.47517	0.133858	40.9027	1e-300	1e-300	ENSRNOG00000005861	Significant	Upregulated	300	7.47058
Htr5b	7.77651	7.0438	1.3318	5.28894	1.23028e-07	5.36789e-07	ENSRNOG00000002549	Significant	Upregulated	6.91	0.750865
Htr6	6.58845	6.86987	1.35991	5.05172	4.37855e-07	1.79853e-06	ENSRNOG00000049761	Significant	Upregulated	6.35867	0.735344
Id2	732.503	4.86959	0.166269	29.2875	1.49846e-188	4.3723e-186	ENSRNOG00000007237	Significant	Upregulated	187.824	6.01435
Ier3	2290.68	3.9584	0.117297	33.7468	1.19283e-249	5.90631e-247	ENSRNOG00000000827	Significant	Upregulated	248.923	8.52536
Ifitm10	99.3197	3.64495	0.260531	13.9905	1.78212e-44	5.5361e-43	ENSRNOG00000020164	Significant	Upregulated	43.7491	3.83832
Ikzf1	6.34787	4.09803	1.25974	3.25308	0.00114161	0.00291442	ENSRNOG00000004444	Significant	Upregulated	2.94248	0.793817
Il12b	6.61215	6.75082	1.32453	5.09675	3.45527e-07	1.44065e-06	ENSRNOG00000004380	Significant	Upregulated	6.46152	0.754983
Il17f	2.34186	5.23617	1.62621	3.21985	0.00128256	0.00324914	ENSRNOG00000012509	Significant	Upregulated	2.89192	0.614926
Il1a	10.1573	5.59959	1.1364	4.92748	8.32966e-07	3.3116e-06	ENSRNOG00000004575	Significant	Upregulated	6.07937	0.879972
Il1b	18.6111	8.36633	1.27562	6.55865	5.42958e-11	3.24504e-10	ENSRNOG00000004649	Significant	Upregulated	10.2652	0.783935
Il1rn	6.79323	5.82892	1.39338	4.18331	2.87296e-05	9.52406e-05	ENSRNOG00000005871	Significant	Upregulated	4.54167	0.717682
Il34	21.8272	3.98464	0.542879	7.33983	2.13859e-13	1.55863e-12	ENSRNOG00000017602	Significant	Upregulated	12.6699	1.84203
Il6	7.37276	4.94596	1.20743	4.09626	4.19879e-05	0.000136073	ENSRNOG00000010278	Significant	Upregulated	4.37688	0.828203
Insrr	28.5413	6.11094	0.801164	7.62758	2.39202e-14	1.87371e-13	ENSRNOG00000057702	Significant	Upregulated	13.6212	1.24818
Irag1	151.27	-3.53623	0.246237	-14.3611	9.08312e-47	3.01663e-45	ENSRNOG00000017767	Significant	Downregulated	46.0418	4.06112
Irf8	7.14951	3.97784	0.943451	4.21626	2.48383e-05	8.30654e-05	ENSRNOG00000017869	Significant	Upregulated	4.60488	1.05994
Itga10	358.321	3.61607	0.183352	19.7221	1.39411e-86	1.11665e-84	ENSRNOG00000021217	Significant	Upregulated	85.8557	5.454
Itga8	1009.6	-3.01275	0.130196	-23.14	1.83183e-118	2.37556e-116	ENSRNOG00000016538	Significant	Downregulated	117.737	7.68071
Itprid1	20.6001	-5.44159	1.089	-4.99686	5.82702e-07	2.35852e-06	ENSRNOG00000012165	Significant	Downregulated	6.23455	0.918273
Jag2	13.0107	4.92735	0.841898	5.85267	4.83746e-09	2.44643e-08	ENSRNOG00000013927	Significant	Upregulated	8.31538	1.18779
Kbtbd11	304.87	4.73704	0.256025	18.5023	1.97973e-76	1.26363e-74	ENSRNOG00000012333	Significant	Upregulated	75.7034	3.90587
Kcna2	24.9589	3.33123	0.516884	6.44484	1.15724e-10	6.72689e-10	ENSRNOG00000018285	Significant	Upregulated	9.93658	1.93467
Kcna3	23.2715	3.48903	0.64743	5.38905	7.08328e-08	3.17707e-07	ENSRNOG00000062002	Significant	Upregulated	7.14977	1.54457
Kcna4	16.7188	3.10864	0.549019	5.66217	1.49467e-08	7.21502e-08	ENSRNOG00000004918	Significant	Upregulated	7.82546	1.82143
Kcna7	15.3712	5.54939	0.945971	5.86634	4.45518e-09	2.2629e-08	ENSRNOG00000020779	Significant	Upregulated	8.35113	1.05711
Kcnb2	5.70414	-4.39409	1.33425	-3.29331	0.000990135	0.00255227	ENSRNOG00000028991	Significant	Downregulated	3.00431	0.749487
Kcnc3	26.3961	4.91764	0.718474	6.84457	7.6707e-12	4.91719e-11	ENSRNOG00000019959	Significant	Upregulated	11.1152	1.39184
Kcng2	15.6671	4.13193	0.800555	5.16133	2.45201e-07	1.03932e-06	ENSRNOG00000053640	Significant	Upregulated	6.61048	1.24913
Kcnj16	5.04337	-5.22227	1.47282	-3.54577	0.00039147	0.00108344	ENSRNOG00000004713	Significant	Downregulated	3.4073	0.678971
Kcnj4	4.43314	5.05107	1.46572	3.44614	0.000568649	0.00153043	ENSRNOG00000013869	Significant	Upregulated	3.24516	0.68226
Kcnma1	46.0413	3.09397	0.402777	7.68159	1.57124e-14	1.2439e-13	ENSRNOG00000005985	Significant	Upregulated	13.8038	2.48277
Kcnmb1	3.83851	-4.89268	1.47903	-3.30803	0.000939539	0.00243452	ENSRNOG00000005465	Significant	Downregulated	3.02709	0.676118
Kcnn3	21.0754	4.05112	0.571512	7.08843	1.35645e-12	9.25834e-12	ENSRNOG00000020706	Significant	Upregulated	11.8676	1.74975
Kcnn4	51.5142	3.88133	0.401867	9.65824	4.53597e-22	5.77241e-21	ENSRNOG00000019440	Significant	Upregulated	21.3433	2.48839
Kcnt1	41.8201	7.06864	0.942547	7.49951	6.40587e-14	4.8392e-13	ENSRNOG00000017283	Significant	Upregulated	13.1934	1.06096
Kctd11	737.83	3.07187	0.419842	7.31672	2.541e-13	1.84042e-12	ENSRNOG00000015669	Significant	Upregulated	12.595	2.38185
Kctd16	246.178	3.42204	0.191262	17.8918	1.36505e-71	8.02332e-70	ENSRNOG00000069221	Significant	Upregulated	70.8649	5.22842
Kdm3a	2032.14	3.07931	0.106136	29.013	4.51569e-185	1.27218e-182	ENSRNOG00000007814	Significant	Upregulated	184.345	9.42191
Khdrbs2	91.0005	-3.23329	0.297787	-10.8578	1.83193e-27	3.13443e-26	ENSRNOG00000012284	Significant	Downregulated	26.7371	3.35811
Khk	3.60427	5.99578	1.53386	3.90894	9.2703e-05	0.000281979	ENSRNOG00000008047	Significant	Upregulated	4.03291	0.651948
Kiaa1755	25.6851	4.70766	0.630591	7.46547	8.30005e-14	6.22695e-13	ENSRNOG00000014424	Significant	Upregulated	13.0809	1.58581
Kif1a	59.7423	3.06362	0.327785	9.34643	9.06548e-21	1.05431e-19	ENSRNOG00000023993	Significant	Upregulated	20.0426	3.05078
Klhdc8a	107.152	3.52197	0.333477	10.5614	4.50039e-26	7.13945e-25	ENSRNOG00000000036	Significant	Upregulated	25.3468	2.99871
Klhl32	41.5297	6.65067	0.780178	8.52456	1.53394e-17	1.47352e-16	ENSRNOG00000007441	Significant	Upregulated	16.8142	1.28176
Klhl40	28.5378	3.85146	0.592648	6.49874	8.09974e-11	4.76764e-10	ENSRNOG00000019390	Significant	Upregulated	10.0915	1.68734
Klrg2	24.7683	3.01894	0.5231	5.77126	7.86828e-09	3.9019e-08	ENSRNOG00000006814	Significant	Upregulated	8.10412	1.91168
LOC120100232	3.96339	-4.01702	1.3906	-2.8887	0.00386835	0.00903242	ENSRNOG00000056942	Significant	Downregulated	2.41247	0.719115
Lamb3	412.379	3.56009	0.16365	21.7544	6.28157e-105	6.75269e-103	ENSRNOG00000006025	Significant	Upregulated	104.202	6.11061
Larp1bl	3.95042	3.41504	1.13798	3.00097	0.00269118	0.00646295	ENSRNOG00000013940	Significant	Upregulated	2.57006	0.878751
Lce1m	3.87148	-4.02683	1.4108	-2.85428	0.00431349	0.00998759	ENSRNOG00000009581	Significant	Downregulated	2.36517	0.708815
Lcn2	892.369	12.0957	1.03284	11.7111	1.11825e-31	2.25304e-30	ENSRNOG00000013973	Significant	Upregulated	30.9515	0.968204
Liph	41.952	7.66729	1.13951	6.7286	1.71307e-11	1.06553e-10	ENSRNOG00000047894	Significant	Upregulated	10.7662	0.877571
Lman1l	4.29728	3.53984	1.22806	2.88245	0.00394596	0.00920442	ENSRNOG00000019355	Significant	Upregulated	2.40385	0.814289
Lmntd2	9.43748	7.30234	1.28407	5.68686	1.29393e-08	6.28129e-08	ENSRNOG00000017050	Significant	Upregulated	7.88809	0.778773
Lmod1	868.799	-3.31418	0.193415	-17.1351	8.12189e-66	4.26726e-64	ENSRNOG00000051548	Significant	Downregulated	65.0903	5.17023
Lratd2	202.988	-3.85953	0.238626	-16.174	7.69759e-59	3.50358e-57	ENSRNOG00000004744	Significant	Downregulated	58.1136	4.19066
Lrmda	6.93681	4.30373	1.02271	4.20815	2.57474e-05	8.57723e-05	ENSRNOG00000069198	Significant	Upregulated	4.58927	0.977791
Lrp2bp	6.89729	4.4134	1.06722	4.1354	3.54333e-05	0.000116214	ENSRNOG00000011178	Significant	Upregulated	4.45059	0.93701
Lrpl1	40.6154	4.64319	0.509002	9.12215	7.36486e-20	8.04962e-19	ENSRNOG00000054809	Significant	Upregulated	19.1328	1.96463
Lrrc23	59.2231	3.16113	0.349761	9.03796	1.59619e-19	1.72157e-18	ENSRNOG00000026309	Significant	Upregulated	18.7969	2.85909
Lypd6	5.12521	-4.77094	1.39195	-3.42753	0.000609103	0.00162946	ENSRNOG00000068044	Significant	Downregulated	3.21531	0.718418
Maff	476.018	3.50264	0.127635	27.4427	8.4985e-166	2.01254e-163	ENSRNOG00000012886	Significant	Upregulated	165.071	7.83486
Mal2	3.65996	-4.95688	1.48629	-3.33506	0.000852798	0.00222386	ENSRNOG00000008615	Significant	Downregulated	3.06915	0.672816
Map3k21	3.74791	5.05582	1.47781	3.42115	0.000623566	0.00166428	ENSRNOG00000019931	Significant	Upregulated	3.20512	0.676676
Map3k8	118.952	3.45258	0.278831	12.3824	3.2563e-35	7.52588e-34	ENSRNOG00000016378	Significant	Upregulated	34.4873	3.5864
Map3k9	53.5412	3.26718	0.312475	10.4558	1.37809e-25	2.12234e-24	ENSRNOG00000007271	Significant	Upregulated	24.8607	3.20026
Map7	150.973	6.25123	0.369266	16.9288	2.7601e-64	1.40498e-62	ENSRNOG00000012701	Significant	Upregulated	63.5591	2.70807
Mapt	86.0469	6.08036	0.463721	13.1121	2.80689e-39	7.42146e-38	ENSRNOG00000005133	Significant	Upregulated	38.5518	2.15647
Matn1	4.47057	6.31046	1.49812	4.21226	2.52829e-05	8.43278e-05	ENSRNOG00000010932	Significant	Upregulated	4.59717	0.667504
Mcf2	76.6559	-5.41591	0.576041	-9.40195	5.35587e-21	6.32791e-20	ENSRNOG00000003435	Significant	Downregulated	20.2712	1.73599
Mcoln3	6.33878	4.25932	1.10021	3.87138	0.000108223	0.000326326	ENSRNOG00000015024	Significant	Upregulated	3.96568	0.90892
Mdga2	8.14913	3.44108	0.834718	4.12245	3.74872e-05	0.000122422	ENSRNOG00000000618	Significant	Upregulated	4.42612	1.19801
Mesp2	2.93749	4.63624	1.52362	3.04292	0.00234298	0.00568861	ENSRNOG00000014925	Significant	Upregulated	2.63023	0.656333
Mfsd2a	59.2622	-5.43883	0.628034	-8.6601	4.71367e-18	4.67363e-17	ENSRNOG00000014008	Significant	Downregulated	17.3266	1.59227
Mgarp	322.26	3.9595	0.156183	25.3518	8.591e-142	1.63229e-139	ENSRNOG00000011923	Significant	Upregulated	141.066	6.40276
Mgp	7437.39	3.05046	0.275592	11.0687	1.77896e-28	3.17339e-27	ENSRNOG00000005695	Significant	Upregulated	27.7498	3.62855
Mindy2	204.084	3.32942	0.2703	12.3175	7.29244e-35	1.66889e-33	ENSRNOG00000061337	Significant	Upregulated	34.1371	3.69959
Mir101a	9.55306	7.38606	1.45414	5.07935	3.78731e-07	1.56908e-06	ENSRNOG00000035599	Significant	Upregulated	6.42167	0.687694
Mir146a	8.5296	7.24218	1.42107	5.09627	3.46406e-07	1.44358e-06	ENSRNOG00000035466	Significant	Upregulated	6.46041	0.703693
Mir221	15.0145	3.07522	0.698136	4.40491	1.0583e-05	3.69501e-05	ENSRNOG00000035631	Significant	Upregulated	4.97539	1.43239
Mir222	6.19842	6.65029	1.59469	4.17027	3.04241e-05	0.000100552	ENSRNOG00000035581	Significant	Upregulated	4.51678	0.62708
Mir23b	42.9605	3.28137	0.644102	5.09449	3.49675e-07	1.45609e-06	ENSRNOG00000035467	Significant	Upregulated	6.45634	1.55255
Mir27b	68.4507	3.45783	0.883677	3.913	9.11563e-05	0.00027758	ENSRNOG00000035576	Significant	Upregulated	4.04021	1.13163
Mir351	11.7244	3.38785	0.849862	3.98636	6.7095e-05	0.000211974	ENSRNOG00000069684	Significant	Upregulated	4.17331	1.17666
Mir542	7.67416	3.95837	1.04581	3.78497	0.000153728	0.000452352	ENSRNOG00000070890	Significant	Upregulated	3.81325	0.956195
Mmp12	59.7994	4.65449	0.394285	11.8049	3.68282e-32	7.54102e-31	ENSRNOG00000030187	Significant	Upregulated	31.4338	2.53624
Mmp13	456.18	6.3257	0.485208	13.0371	7.52789e-39	1.96181e-37	ENSRNOG00000008478	Significant	Upregulated	38.1233	2.06097
Mmp3	123.845	4.21777	0.280328	15.0458	3.67646e-51	1.381e-49	ENSRNOG00000032626	Significant	Upregulated	50.4346	3.56725
Mmp9	490.908	7.41037	0.295712	25.0594	1.37838e-138	2.44812e-136	ENSRNOG00000017539	Significant	Upregulated	137.861	3.38167
Mogat1	10.5457	-3.06178	0.783416	-3.90824	9.29719e-05	0.000282687	ENSRNOG00000014692	Significant	Downregulated	4.03165	1.27646
Morc1	14.1013	-4.4978	1.1238	-4.00233	6.2723e-05	0.000198854	ENSRNOG00000032101	Significant	Downregulated	4.20257	0.88984
Mos	10.2597	4.17914	0.830753	5.03055	4.89072e-07	2.00036e-06	ENSRNOG00000008567	Significant	Upregulated	6.31063	1.20373
Ms4a7	52.6439	-3.79134	0.441067	-8.59583	8.26641e-18	8.09791e-17	ENSRNOG00000020953	Significant	Downregulated	17.0827	2.26723
Mt1	911.847	5.81711	0.354852	16.3931	2.14348e-60	9.95015e-59	ENSRNOG00000025764	Significant	Upregulated	59.6689	2.81808
Mt2A	1242.54	6.75727	0.181875	37.1533	3.88085e-302	3.01967e-299	ENSRNOG00000043098	Significant	Upregulated	301.411	5.49827
Mtss1	491.459	3.47798	0.142602	24.3895	2.21177e-131	3.54317e-129	ENSRNOG00000009001	Significant	Upregulated	130.655	7.01255
Mturn	121.114	4.49329	0.367492	12.2269	2.2321e-34	5.00996e-33	ENSRNOG00000010205	Significant	Upregulated	33.6513	2.72115
Myh1	157.527	-3.59531	0.261362	-13.7561	4.68325e-43	1.39368e-41	ENSRNOG00000049695	Significant	Downregulated	42.3295	3.82612
Myh2	120.656	-4.17342	0.337676	-12.3592	4.34217e-35	1.00072e-33	ENSRNOG00000065740	Significant	Downregulated	34.3623	2.96142
Myh3	100.156	-4.66969	0.452946	-10.3096	6.37731e-25	9.44744e-24	ENSRNOG00000046276	Significant	Downregulated	24.1954	2.20777
Nbeal2	77.6819	3.02475	0.364027	8.30913	9.64045e-17	8.84971e-16	ENSRNOG00000027880	Significant	Upregulated	16.0159	2.74705
Ndrg1	9508.25	6.56002	0.129359	50.7117	1e-300	1e-300	ENSRNOG00000007393	Significant	Upregulated	300	7.73043
Ndrg2	572.307	3.69529	0.168701	21.9044	2.35905e-106	2.58704e-104	ENSRNOG00000010389	Significant	Upregulated	105.627	5.92765
Ndst3	80.5893	3.07012	0.349142	8.79333	1.45195e-18	1.48374e-17	ENSRNOG00000015781	Significant	Upregulated	17.838	2.86417
Ndufa4l2	2065.43	7.22157	0.202207	35.7138	2.41659e-279	1.41025e-276	ENSRNOG00000031851	Significant	Upregulated	278.617	4.94543
Necab1	45.0439	-3.00705	0.388773	-7.73474	1.03615e-14	8.31563e-14	ENSRNOG00000066027	Significant	Downregulated	13.9846	2.5722
Nefh	30.148	5.5564	0.675835	8.22153	2.00916e-16	1.8138e-15	ENSRNOG00000008716	Significant	Upregulated	15.697	1.47965
Neurod6	3.44104	-4.74666	1.51099	-3.14142	0.00168131	0.00417899	ENSRNOG00000026055	Significant	Downregulated	2.77435	0.661817
Nfkbia	659.368	3.44478	0.392438	8.77789	1.66574e-18	1.69478e-17	ENSRNOG00000007390	Significant	Upregulated	17.7784	2.54817
Nfkbiz	849.231	4.97798	0.173754	28.6496	1.62189e-180	4.41696e-178	ENSRNOG00000031163	Significant	Upregulated	179.79	5.75526
Ngfr	19.1397	3.66518	0.603389	6.07433	1.2451e-09	6.62269e-09	ENSRNOG00000005392	Significant	Upregulated	8.9048	1.6573
Nmu	15.5875	-3.40427	0.698042	-4.87688	1.07779e-06	4.23037e-06	ENSRNOG00000002164	Significant	Downregulated	5.96747	1.43258
Nod2	17.5546	3.9327	0.587812	6.69041	2.22551e-11	1.37019e-10	ENSRNOG00000014124	Significant	Upregulated	10.6526	1.70122
Nos2	129.55	11.1685	1.39019	8.0338	9.4498e-16	8.18282e-15	ENSRNOG00000057443	Significant	Upregulated	15.0246	0.719328
Notch4	105.744	3.45936	0.366321	9.44354	3.60404e-21	4.31113e-20	ENSRNOG00000000442	Significant	Upregulated	20.4432	2.72985
Npy1r	14.1173	-3.16541	0.691022	-4.58076	4.6328e-06	1.68484e-05	ENSRNOG00000014149	Significant	Downregulated	5.33416	1.44713
Nrtn	4.10103	3.61452	1.16873	3.09269	0.00198348	0.00487369	ENSRNOG00000048651	Significant	Upregulated	2.70257	0.855632
Nrxn2	9.6506	3.03187	0.72258	4.19589	2.71801e-05	9.04527e-05	ENSRNOG00000021103	Significant	Upregulated	4.56575	1.38393
Ntn1	535.212	3.77059	0.14864	25.3673	5.79613e-142	1.11422e-139	ENSRNOG00000003947	Significant	Upregulated	141.237	6.72766
Ntrk1	309.182	8.5578	0.523221	16.356	3.94301e-60	1.82518e-58	ENSRNOG00000013953	Significant	Upregulated	59.4042	1.91124
Nudt11	7.76523	3.97445	0.958172	4.14795	3.35464e-05	0.000110225	ENSRNOG00000046053	Significant	Upregulated	4.47435	1.04365
Nxph4	255.486	5.03328	0.248769	20.2328	5.03742e-91	4.40168e-89	ENSRNOG00000025059	Significant	Upregulated	90.2978	4.0198
Oasl	5.25953	3.25359	1.0501	3.09836	0.00194597	0.00478585	ENSRNOG00000001187	Significant	Upregulated	2.71086	0.952289
Odad2	2.80803	-4.4871	1.52426	-2.9438	0.00324212	0.00767216	ENSRNOG00000018905	Significant	Downregulated	2.48917	0.656058
Olah	4.1866	6.21825	1.52967	4.06509	4.80146e-05	0.000154532	ENSRNOG00000016403	Significant	Upregulated	4.31863	0.653735
Osr1	453.6	-3.20852	0.156429	-20.511	1.71657e-93	1.55827e-91	ENSRNOG00000004210	Significant	Downregulated	92.7653	6.39268
Otop1	23.9396	4.44653	0.578954	7.68028	1.58735e-14	1.25604e-13	ENSRNOG00000028423	Significant	Upregulated	13.7993	1.72725
P2rx6	41.532	4.26689	0.439709	9.70391	2.90174e-22	3.7217e-21	ENSRNOG00000001873	Significant	Upregulated	21.5373	2.27423
P2ry6	6.22511	3.19112	0.943733	3.38138	0.000721239	0.00190235	ENSRNOG00000019270	Significant	Upregulated	3.14192	1.05962
P3h2	24.0745	3.43708	0.4788	7.17852	7.04684e-13	4.91234e-12	ENSRNOG00000055751	Significant	Upregulated	12.152	2.08855
P4ha2	10918	3.35906	0.0566891	59.254	1e-300	1e-300	ENSRNOG00000033663	Significant	Upregulated	300	17.6401
Palmd	222.812	-3.09163	0.224232	-13.7876	3.02563e-43	9.13841e-42	ENSRNOG00000058609	Significant	Downregulated	42.5192	4.45967
Panx3	273.558	-4.44113	0.234882	-18.9079	9.81899e-80	6.62985e-78	ENSRNOG00000031675	Significant	Downregulated	79.0079	4.25746
Parm1	556.164	-3.7686	0.151647	-24.8512	2.51191e-136	4.2314e-134	ENSRNOG00000002579	Significant	Downregulated	135.6	6.59428
Pde1c	9.0795	-3.0672	0.909111	-3.37385	0.000741254	0.0019523	ENSRNOG00000012337	Significant	Downregulated	3.13003	1.09998
Pdia2	12.2048	3.45608	0.650739	5.31101	1.09018e-07	4.78858e-07	ENSRNOG00000063310	Significant	Upregulated	6.9625	1.53672
Pex26	322.533	3.07269	0.175236	17.5346	7.80474e-69	4.33774e-67	ENSRNOG00000049982	Significant	Upregulated	68.1076	5.70658
Pfkp	2213.65	3.50936	0.160318	21.8899	3.23955e-106	3.52895e-104	ENSRNOG00000017163	Significant	Upregulated	105.49	6.23758
Pgk1	27907.1	3.90523	0.0827948	47.1675	1e-300	1e-300	ENSRNOG00000058249	Significant	Upregulated	300	12.0781
Pgk1l1	103.598	4.65722	0.319772	14.5642	4.74424e-48	1.62518e-46	ENSRNOG00000026928	Significant	Upregulated	47.3238	3.12723
Pglyrp1	128.72	4.73732	0.30562	15.5007	3.43296e-54	1.41296e-52	ENSRNOG00000013395	Significant	Upregulated	53.4643	3.27203
Pglyrp2	4.11433	5.98994	1.46373	4.09224	4.27223e-05	0.000138316	ENSRNOG00000042318	Significant	Upregulated	4.36935	0.683186
Phf24	105.379	4.68129	0.341767	13.6973	1.0535e-42	3.07396e-41	ENSRNOG00000000129	Significant	Upregulated	41.9774	2.92597
Phospho1	89.9517	3.30583	0.255423	12.9425	2.589e-38	6.65161e-37	ENSRNOG00000005569	Significant	Upregulated	37.5869	3.91507
Pla2g2a	318.253	8.00592	0.682293	11.7338	8.54849e-32	1.72874e-30	ENSRNOG00000016945	Significant	Upregulated	31.0681	1.46565
Pla2g5	8.55756	3.79602	0.91683	4.14037	3.46741e-05	0.000113816	ENSRNOG00000016838	Significant	Upregulated	4.45999	1.09072
Pla2g7	143.803	4.49307	0.286514	15.6819	2.01273e-55	8.49821e-54	ENSRNOG00000025691	Significant	Upregulated	54.6962	3.49023
Pld6	6.52422	3.77598	0.999794	3.77676	0.000158883	0.00046618	ENSRNOG00000021657	Significant	Upregulated	3.79892	1.00021
Plekha2	114.768	4.89862	0.294548	16.631	4.15687e-62	2.03363e-60	ENSRNOG00000066109	Significant	Upregulated	61.3812	3.39504
Plet1	2.01983	5.16257	1.7715	2.91424	0.00356554	0.00837684	ENSRNOG00000024346	Significant	Upregulated	2.44787	0.564494
Plvap	29.1074	9.01478	1.21825	7.39976	1.36429e-13	1.00917e-12	ENSRNOG00000017676	Significant	Upregulated	12.8651	0.820848
Plxdc1	32.9537	4.12911	0.519991	7.94074	2.00973e-15	1.7015e-14	ENSRNOG00000021536	Significant	Upregulated	14.6969	1.92311
Pnma8c	2.53048	5.2842	1.58201	3.34018	0.000837252	0.00218681	ENSRNOG00000063049	Significant	Upregulated	3.07714	0.632106
Podxl	12.014	4.17661	0.743398	5.61827	1.92874e-08	9.18553e-08	ENSRNOG00000012495	Significant	Upregulated	7.71473	1.34517
Ppargc1a	5.97386	4.49364	1.20597	3.72617	0.000194415	0.000563751	ENSRNOG00000004473	Significant	Upregulated	3.71127	0.82921
Ppp1r3b	356.289	4.97478	0.214366	23.2069	3.87407e-119	5.10502e-117	ENSRNOG00000011474	Significant	Upregulated	118.412	4.66491
Ppp1r3c	750.283	3.19369	0.145731	21.915	1.87022e-106	2.06482e-104	ENSRNOG00000018494	Significant	Upregulated	105.728	6.86195
Ppp1r3g	44.965	4.27105	0.395406	10.8017	3.37998e-27	5.70719e-26	ENSRNOG00000016222	Significant	Upregulated	26.4711	2.52905
Ppp2r2b	11.7228	-3.17511	0.824435	-3.85126	0.000117513	0.000352518	ENSRNOG00000018851	Significant	Downregulated	3.92991	1.21295
Ppp2r2c	8.98883	3.66276	0.851757	4.30024	1.70615e-05	5.80318e-05	ENSRNOG00000058202	Significant	Upregulated	4.76798	1.17404
Prelid2	202.107	3.48737	0.181629	19.2005	3.66618e-82	2.67435e-80	ENSRNOG00000067168	Significant	Upregulated	81.4358	5.50573
Prom1	330.56	-3.14846	0.165463	-19.0282	9.96507e-81	6.98838e-79	ENSRNOG00000003098	Significant	Downregulated	80.0015	6.04364
Prr15	51.5624	4.39673	0.423619	10.379	3.09065e-25	4.67604e-24	ENSRNOG00000009564	Significant	Upregulated	24.51	2.36061
Prr19	5.38371	4.43986	1.29778	3.42112	0.000623646	0.00166428	ENSRNOG00000043154	Significant	Upregulated	3.20506	0.770546
Prss46	3.49579	5.95127	1.55691	3.82248	0.000132114	0.000392999	ENSRNOG00000020981	Significant	Upregulated	3.87905	0.642298
Psd4	16.3558	3.61156	0.722298	5.0001	5.73003e-07	2.32156e-06	ENSRNOG00000006079	Significant	Upregulated	6.24184	1.38447
Psmb8	62.3055	3.26597	0.351468	9.29237	1.50894e-20	1.73513e-19	ENSRNOG00000000456	Significant	Upregulated	19.8213	2.84521
Ptgs2	3367.64	4.1027	0.302957	13.5422	8.81014e-42	2.48203e-40	ENSRNOG00000002525	Significant	Upregulated	41.055	3.3008
Ptpre	19.4808	3.20547	0.592785	5.40748	6.39183e-08	2.88356e-07	ENSRNOG00000015717	Significant	Upregulated	7.19437	1.68695
Ptprr	11.5478	-3.58757	0.914417	-3.92335	8.73271e-05	0.000266715	ENSRNOG00000004483	Significant	Downregulated	4.05885	1.09359
Ptprz1	39.6988	3.09432	0.378289	8.17979	2.84332e-16	2.54296e-15	ENSRNOG00000006030	Significant	Upregulated	15.5462	2.64348
Pygl	3494.83	5.29728	0.124706	42.478	1e-300	1e-300	ENSRNOG00000006388	Significant	Upregulated	300	8.01883
Qpct	399.246	4.42886	0.161825	27.3682	6.55831e-165	1.5309e-162	ENSRNOG00000005705	Significant	Upregulated	164.183	6.17951
Qprt	7.11692	3.58892	0.89016	4.03177	5.53589e-05	0.000176742	ENSRNOG00000016980	Significant	Upregulated	4.25681	1.12339
R3hdml	4.47287	-4.66368	1.42564	-3.27129	0.00107059	0.00274177	ENSRNOG00000027432	Significant	Downregulated	2.97038	0.70144
RT1-Bb	3.2565	5.84904	1.5913	3.67563	0.000237262	0.000678484	ENSRNOG00000032708	Significant	Upregulated	3.62477	0.628417
RT1-CE1	49.031	3.06009	0.417367	7.3319	2.26918e-13	1.64866e-12	ENSRNOG00000030712	Significant	Upregulated	12.6441	2.39597
RT1-CE11	66.4499	5.68511	0.468687	12.1299	7.33742e-34	1.62237e-32	ENSRNOG00000038999	Significant	Upregulated	33.1345	2.13362
RT1-CE14	29.227	3.855	0.535267	7.20201	5.93296e-13	4.15892e-12	ENSRNOG00000066181	Significant	Upregulated	12.2267	1.86823
RT1-CE15	7.33239	6.03935	1.33458	4.52526	6.032e-06	2.16527e-05	ENSRNOG00000065311	Significant	Upregulated	5.21954	0.749297
RT1-CE16	25.5971	3.77702	0.604191	6.25138	4.06848e-10	2.24895e-09	ENSRNOG00000065254	Significant	Upregulated	9.39057	1.65511
RT1-CE2	40.944	3.72275	0.402214	9.25563	2.12969e-20	2.42165e-19	ENSRNOG00000047706	Significant	Upregulated	19.6717	2.48624
RT1-DMb	4.6601	4.17933	1.34076	3.11715	0.00182609	0.00451138	ENSRNOG00000049491	Significant	Upregulated	2.73848	0.745848
RT1-S3	104.474	3.48126	0.298296	11.6705	1.80391e-31	3.61667e-30	ENSRNOG00000000777	Significant	Upregulated	30.7438	3.35237
Rab26	519.113	3.20306	0.165911	19.3058	4.79868e-83	3.54798e-81	ENSRNOG00000042086	Significant	Upregulated	82.3189	6.02731
Rasd1	34.0426	3.87278	0.525364	7.37162	1.68569e-13	1.23794e-12	ENSRNOG00000003348	Significant	Upregulated	12.7732	1.90344
Rasd2	10.2025	4.23587	0.862611	4.91052	9.08335e-07	3.59288e-06	ENSRNOG00000014761	Significant	Upregulated	6.04175	1.15927
Rasgef1a	6.0616	5.65029	1.33001	4.2483	2.15401e-05	7.25253e-05	ENSRNOG00000031671	Significant	Upregulated	4.66675	0.751873
Rasgrf1	62.7556	5.06661	0.456078	11.1091	1.13308e-28	2.03681e-27	ENSRNOG00000014025	Significant	Upregulated	27.9457	2.19261
Rasl12	219.799	4.10958	0.281438	14.6021	2.72357e-48	9.34941e-47	ENSRNOG00000032339	Significant	Upregulated	47.5649	3.55318
Rassf7	53.3736	3.59353	0.321029	11.1938	4.37463e-29	8.01362e-28	ENSRNOG00000017109	Significant	Upregulated	28.3591	3.11498
Rbp1	73.2152	6.2896	0.542834	11.5866	4.81813e-31	9.50824e-30	ENSRNOG00000013794	Significant	Upregulated	30.3171	1.84218
Rbp2	4.47198	5.31608	1.46581	3.62673	0.000287034	0.000810182	ENSRNOG00000013932	Significant	Upregulated	3.54207	0.682219
Rcsd1	7.68765	3.37557	0.889851	3.79341	0.000148593	0.00043819	ENSRNOG00000003283	Significant	Upregulated	3.828	1.12378
Reep1	21.2527	3.95626	0.597625	6.61997	3.59266e-11	2.1815e-10	ENSRNOG00000008481	Significant	Upregulated	10.4446	1.67329
Ret	236.188	9.5904	0.902144	10.6307	2.14541e-26	3.47089e-25	ENSRNOG00000014751	Significant	Upregulated	25.6685	1.10847
Rgs11	365.547	5.50689	0.23342	23.5922	4.63056e-123	6.52271e-121	ENSRNOG00000066310	Significant	Upregulated	122.334	4.28413
Rgs4	249.027	-3.92462	0.214127	-18.3284	4.90785e-75	3.07258e-73	ENSRNOG00000002773	Significant	Downregulated	74.3091	4.67012
Rgs5	3.79502	-4.27423	1.43496	-2.97863	0.0028954	0.00691476	ENSRNOG00000002730	Significant	Downregulated	2.53829	0.696881
Rgs6	3.64724	-4.7685	1.57359	-3.03032	0.00244294	0.00591636	ENSRNOG00000008082	Significant	Downregulated	2.61209	0.635488
Rgs9	246.5	7.05415	0.367369	19.2018	3.57332e-82	2.6183e-80	ENSRNOG00000003800	Significant	Upregulated	81.4469	2.72206
Rhbdf2	494.89	4.0307	0.136487	29.5316	1.13041e-191	3.62174e-189	ENSRNOG00000011459	Significant	Upregulated	190.947	7.32668
Rnf144b	39.4416	3.32018	0.456828	7.2679	3.65122e-13	2.6087e-12	ENSRNOG00000016123	Significant	Upregulated	12.4376	2.18901
Rnf152	116.554	8.56126	0.854159	10.023	1.20742e-23	1.65653e-22	ENSRNOG00000014859	Significant	Upregulated	22.9181	1.17074
Rprml	11.9142	4.76014	0.854531	5.57046	2.54064e-08	1.19568e-07	ENSRNOG00000028436	Significant	Upregulated	7.59506	1.17023
Rragd	28.2202	5.4459	0.703678	7.73919	1.00051e-14	8.04146e-14	ENSRNOG00000007331	Significant	Upregulated	13.9998	1.4211
Rrp12	396.937	-3.17209	0.200337	-15.8337	1.82077e-56	7.89162e-55	ENSRNOG00000048495	Significant	Downregulated	55.7397	4.99159
Rsad2	3.52879	4.96883	1.51955	3.26993	0.00107573	0.00275378	ENSRNOG00000007539	Significant	Upregulated	2.9683	0.658089
Rsph6a	14.6867	3.0157	0.569613	5.29429	1.19483e-07	5.22857e-07	ENSRNOG00000061526	Significant	Upregulated	6.9227	1.75558
Rxfp3	12.6802	-5.58437	1.27167	-4.39138	1.12635e-05	3.91502e-05	ENSRNOG00000023126	Significant	Downregulated	4.94833	0.786369
S1pr5	4.02635	4.19115	1.29953	3.22512	0.00125919	0.00319441	ENSRNOG00000020901	Significant	Upregulated	2.89991	0.769508
Scn7a	40.9195	3.1835	0.535796	5.94163	2.8221e-09	1.45974e-08	ENSRNOG00000029342	Significant	Upregulated	8.54943	1.86638
Scrt1	4.80883	4.3095	1.35979	3.16924	0.00152838	0.00382271	ENSRNOG00000025594	Significant	Upregulated	2.81577	0.735408
Septin4	51.2605	-3.06582	0.35258	-8.69541	3.45592e-18	3.46653e-17	ENSRNOG00000007367	Significant	Downregulated	17.4614	2.83624
Serinc2	25.4032	4.81328	0.606645	7.93427	2.11742e-15	1.78804e-14	ENSRNOG00000012989	Significant	Upregulated	14.6742	1.64841
Serpina3a	109.527	9.95798	1.2504	7.96383	1.66792e-15	1.42095e-14	ENSRNOG00000048191	Significant	Upregulated	14.7778	0.799744
Serpina3n	109.527	9.95798	1.2504	7.96383	1.66792e-15	1.42095e-14	ENSRNOG00000029949	Significant	Upregulated	14.7778	0.799744
Serpinb10	18.8278	3.52609	0.717644	4.91342	8.95e-07	3.54271e-06	ENSRNOG00000002417	Significant	Upregulated	6.04818	1.39345
Serpinb2	62.0928	4.03156	0.472536	8.53175	1.44151e-17	1.38963e-16	ENSRNOG00000002460	Significant	Upregulated	16.8412	2.11624
Sh2d4b	3.65827	3.95284	1.37752	2.86953	0.00411082	0.00955895	ENSRNOG00000042623	Significant	Upregulated	2.38607	0.725942
She	27.0872	3.70027	0.527	7.02139	2.19674e-12	1.47291e-11	ENSRNOG00000020797	Significant	Upregulated	11.6582	1.89753
Slc11a1	4.67232	3.67498	1.21601	3.02216	0.00250976	0.0060656	ENSRNOG00000014956	Significant	Upregulated	2.60037	0.822362
Slc16a3	1889.48	5.04246	0.188033	26.8168	2.05613e-158	4.47962e-156	ENSRNOG00000036677	Significant	Upregulated	157.687	5.31821
Slc1a1	31.509	4.71297	0.533296	8.83744	9.79383e-19	1.00966e-17	ENSRNOG00000014816	Significant	Upregulated	18.009	1.87513
Slc1a2	12.1913	3.15915	0.632534	4.99444	5.9008e-07	2.38602e-06	ENSRNOG00000005479	Significant	Upregulated	6.22909	1.58094
Slc1a6	2.01983	5.16257	1.7715	2.91424	0.00356554	0.00837684	ENSRNOG00000007509	Significant	Upregulated	2.44787	0.564494
Slc22a20	8.32548	3.55118	0.84786	4.1884	2.80926e-05	9.32803e-05	ENSRNOG00000022673	Significant	Upregulated	4.55141	1.17944
Slc26a9	1.97371	5.04969	1.76624	2.85901	0.00424962	0.00985367	ENSRNOG00000029514	Significant	Upregulated	2.37165	0.566176
Slc2a1	8386.57	4.76063	0.0760919	62.5642	1e-300	1e-300	ENSRNOG00000007284	Significant	Upregulated	300	13.142
Slc2a3	6382.32	5.04935	0.187731	26.8968	2.39625e-159	5.43816e-157	ENSRNOG00000008376	Significant	Upregulated	158.62	5.32678
Slc2a5	6.35258	3.79005	0.971589	3.90088	9.58443e-05	0.000290934	ENSRNOG00000017693	Significant	Upregulated	4.01843	1.02924
Slc35f1	60.6749	-3.63324	0.396616	-9.16059	5.16151e-20	5.6794e-19	ENSRNOG00000000412	Significant	Downregulated	19.2872	2.52133
Slc41a1	2469.04	3.01895	0.0754186	40.0292	1e-300	1e-300	ENSRNOG00000042320	Significant	Upregulated	300	13.2593
Slc44a3	16.0689	3.02246	0.593542	5.09224	3.53856e-07	1.47237e-06	ENSRNOG00000011723	Significant	Upregulated	6.45117	1.6848
Slc6a7	27.453	-3.46709	0.524421	-6.61126	3.81052e-11	2.30949e-10	ENSRNOG00000018644	Significant	Downregulated	10.419	1.90687
Slfn2	11.5155	4.64409	0.937302	4.95475	7.24249e-07	2.90411e-06	ENSRNOG00000037113	Significant	Upregulated	6.14011	1.06689
Slit1	14.0241	4.68845	0.921272	5.0891	3.5977e-07	1.49546e-06	ENSRNOG00000026065	Significant	Upregulated	6.44398	1.08546
Slpi	6.47402	6.84498	1.40961	4.85593	1.19825e-06	4.67959e-06	ENSRNOG00000046699	Significant	Upregulated	5.92145	0.709415
Smox	1126.73	4.37104	0.106599	41.0043	1e-300	1e-300	ENSRNOG00000021255	Significant	Upregulated	300	9.38091
Smtnl2	350.793	3.42988	0.183081	18.7342	2.60531e-78	1.72351e-76	ENSRNOG00000015157	Significant	Upregulated	77.5841	5.46206
Sncb	27.2909	8.91847	1.23977	7.19364	6.3087e-13	4.41852e-12	ENSRNOG00000018039	Significant	Upregulated	12.2001	0.8066
Snora50c	8.1577	-3.28736	1.01494	-3.23897	0.00119964	0.00305424	ENSRNOG00000052344	Significant	Downregulated	2.92095	0.985278
Snord6	6.92708	-3.65279	1.23303	-2.96245	0.00305203	0.00725701	ENSRNOG00000057682	Significant	Downregulated	2.51541	0.81101
Sostdc1	6.6956	-5.55676	1.35583	-4.09842	4.15984e-05	0.000134865	ENSRNOG00000005770	Significant	Downregulated	4.38092	0.737555
Sowahd	11.174	-5.21658	1.26166	-4.13469	3.55433e-05	0.00011654	ENSRNOG00000049392	Significant	Downregulated	4.44924	0.792606
Spmip2	4.69142	5.07892	1.60268	3.16902	0.00152952	0.00382498	ENSRNOG00000032009	Significant	Upregulated	2.81544	0.623956
Spmip6	6.1419	3.01705	0.903519	3.33922	0.000840125	0.00219327	ENSRNOG00000013320	Significant	Upregulated	3.07566	1.10678
Sptbn2	114.61	3.27592	0.246671	13.2805	3.00333e-40	8.1249e-39	ENSRNOG00000058842	Significant	Upregulated	39.5224	4.05398
Sstr2	6.40949	4.33857	1.30223	3.33164	0.000863372	0.00225108	ENSRNOG00000002793	Significant	Upregulated	3.0638	0.767911
Stac2	226.913	6.38494	0.31592	20.2106	7.89477e-91	6.82542e-89	ENSRNOG00000004805	Significant	Upregulated	90.1027	3.16536
Stap2	89.7712	5.49208	0.38226	14.3674	8.29156e-47	2.76498e-45	ENSRNOG00000047306	Significant	Upregulated	46.0814	2.61602
Stc1	474.076	3.88785	0.167192	23.2538	1.30118e-119	1.74273e-117	ENSRNOG00000015075	Significant	Upregulated	118.886	5.98116
Stc2	1131.28	3.09492	0.161194	19.2	3.70422e-82	2.69009e-80	ENSRNOG00000020729	Significant	Upregulated	81.4313	6.2037
Steap4	35.432	8.32957	1.24668	6.68139	2.36693e-11	1.45561e-10	ENSRNOG00000008602	Significant	Upregulated	10.6258	0.802129
Stk32a	6.21052	3.26867	0.964312	3.38964	0.000699834	0.00185067	ENSRNOG00000027066	Significant	Upregulated	3.155	1.03701
Stxbp5l	320.3	-4.35895	0.224113	-19.4498	2.92557e-84	2.24431e-82	ENSRNOG00000002496	Significant	Downregulated	83.5338	4.46204
Styxl2	12.9968	-6.43388	1.29899	-4.953	7.30793e-07	2.92891e-06	ENSRNOG00000003722	Significant	Downregulated	6.13621	0.76983
Sult2b1	3.08372	5.78047	1.60399	3.60382	0.00031358	0.00087994	ENSRNOG00000021046	Significant	Upregulated	3.50365	0.623447
Syk	85.2465	4.91495	0.359738	13.6626	1.69885e-42	4.90446e-41	ENSRNOG00000012160	Significant	Upregulated	41.7698	2.7798
Syngr3	28.123	3.04449	0.460657	6.609	3.86919e-11	2.34418e-10	ENSRNOG00000012620	Significant	Upregulated	10.4124	2.17081
Syt15	10.0584	6.50187	1.48115	4.38973	1.13489e-05	3.94221e-05	ENSRNOG00000051688	Significant	Upregulated	4.94504	0.67515
Syt17	264.697	3.4005	0.191092	17.7951	7.71267e-71	4.4375e-69	ENSRNOG00000017136	Significant	Upregulated	70.1128	5.23309
Sytl3	3.52453	4.52443	1.50847	2.99935	0.00270558	0.00649467	ENSRNOG00000018321	Significant	Upregulated	2.56774	0.662923
Tbc1d30	4.15103	5.20434	1.48392	3.50715	0.000452938	0.00124012	ENSRNOG00000023951	Significant	Upregulated	3.34396	0.673889
Tcf15	2.69302	5.58025	1.61079	3.46429	0.000531634	0.0014399	ENSRNOG00000000012	Significant	Upregulated	3.27439	0.620813
Tent5c	84.4998	3.33332	0.379069	8.79343	1.45068e-18	1.48336e-17	ENSRNOG00000070242	Significant	Upregulated	17.8384	2.63804
Tgfbr3	521.757	3.53376	0.131842	26.803	2.98303e-158	6.41352e-156	ENSRNOG00000002093	Significant	Upregulated	157.525	7.58484
Tgm2	315.394	5.18326	0.23353	22.1953	3.81194e-109	4.32549e-107	ENSRNOG00000012956	Significant	Upregulated	108.419	4.28211
Thbs1	220645	-3.02216	0.120828	-25.0122	4.50877e-138	7.92186e-136	ENSRNOG00000045829	Significant	Downregulated	137.346	8.27624
Thsd4	386.862	3.21675	0.154284	20.8495	1.53881e-96	1.45342e-94	ENSRNOG00000053753	Significant	Upregulated	95.8128	6.48155
Ticam2	64.8525	3.99378	0.452465	8.82671	1.07799e-18	1.10922e-17	ENSRNOG00000042070	Significant	Upregulated	17.9674	2.21012
Tlr2	169.564	4.87191	0.254141	19.1701	6.57468e-82	4.71186e-80	ENSRNOG00000009822	Significant	Upregulated	81.1821	3.93483
Tmc7	12.5837	5.92775	1.14868	5.16047	2.46325e-07	1.04354e-06	ENSRNOG00000016679	Significant	Upregulated	6.60849	0.870561
Tmem106a	165.958	6.83266	0.412482	16.5647	1.25319e-61	6.07632e-60	ENSRNOG00000023628	Significant	Upregulated	60.902	2.42435
Tmem121b	7.19569	-3.67314	1.01152	-3.6313	0.000281995	0.000797059	ENSRNOG00000046851	Significant	Downregulated	3.54976	0.98861
Tmem151a	167.075	3.32387	0.230906	14.3949	5.56901e-47	1.86853e-45	ENSRNOG00000049951	Significant	Upregulated	46.2542	4.33077
Tmem255b	486.25	9.62889	0.84369	11.4128	3.60793e-30	6.82332e-29	ENSRNOG00000026336	Significant	Upregulated	29.4427	1.18527
Tmem45a	3721.75	3.17051	0.0918497	34.5185	4.23422e-261	2.30624e-258	ENSRNOG00000042975	Significant	Upregulated	260.373	10.8874
Tmem61	36.1982	5.01566	0.558868	8.97468	2.84188e-19	3.02123e-18	ENSRNOG00000026594	Significant	Upregulated	18.5464	1.78933
Tmem74b	95.3838	3.30695	0.310985	10.6338	2.07492e-26	3.36352e-25	ENSRNOG00000064442	Significant	Upregulated	25.683	3.21559
Tmt1b	4.14469	6.16134	1.44225	4.27204	1.9369e-05	6.55257e-05	ENSRNOG00000007927	Significant	Upregulated	4.71289	0.693362
Tnf	2.74638	5.61304	1.63832	3.42608	0.000612349	0.00163734	ENSRNOG00000070745	Significant	Upregulated	3.213	0.61038
Tnfaip3	689.864	4.59931	0.202128	22.7545	1.29523e-114	1.56771e-112	ENSRNOG00000049517	Significant	Upregulated	113.888	4.94737
Tnfrsf14	9.14941	7.34245	1.38673	5.2948	1.19149e-07	5.21677e-07	ENSRNOG00000013820	Significant	Upregulated	6.92391	0.721122
Tnfrsf9	17.0642	5.34732	0.826918	6.46657	1.00253e-10	5.85047e-10	ENSRNOG00000036942	Significant	Upregulated	9.9989	1.20931
Tnfsf15	23.4661	3.50712	0.495499	7.07796	1.46296e-12	9.94372e-12	ENSRNOG00000008930	Significant	Upregulated	11.8348	2.01817
Tnip3	9.14198	7.34116	1.34019	5.47769	4.3091e-08	1.98005e-07	ENSRNOG00000064111	Significant	Upregulated	7.36561	0.746162
Trim7	226.513	3.45376	0.240033	14.3887	6.09224e-47	2.0399e-45	ENSRNOG00000002469	Significant	Upregulated	46.2152	4.1661
Tspan33	4.64578	3.61013	1.13936	3.16857	0.00153191	0.00383036	ENSRNOG00000007900	Significant	Upregulated	2.81477	0.877689
Tspo	1050.48	3.07377	0.129546	23.7272	1.89121e-124	2.75914e-122	ENSRNOG00000010549	Significant	Upregulated	123.723	7.71925
Ttc23l	26.4256	5.38388	0.707775	7.60676	2.81045e-14	2.18888e-13	ENSRNOG00000055986	Significant	Upregulated	13.5512	1.41288
Ttc34	5.2252	5.53894	1.53883	3.59946	0.000318879	0.000893278	ENSRNOG00000024526	Significant	Upregulated	3.49637	0.649846
Tuba8	4.77383	5.41083	1.55055	3.48963	0.000483693	0.00131682	ENSRNOG00000048169	Significant	Upregulated	3.31543	0.644934
Upk1b	12.0607	3.65396	0.68548	5.33052	9.79335e-08	4.33198e-07	ENSRNOG00000027380	Significant	Upregulated	7.00907	1.45883
Upp1	157.286	4.46889	0.302103	14.7926	1.63459e-49	5.78122e-48	ENSRNOG00000004972	Significant	Upregulated	48.7866	3.31013
Usp18	9.42103	4.76884	0.977671	4.87776	1.07299e-06	4.21255e-06	ENSRNOG00000037198	Significant	Upregulated	5.9694	1.02284
Utf1	3.29795	5.8714	1.53127	3.83434	0.000125902	0.000375753	ENSRNOG00000050207	Significant	Upregulated	3.89997	0.653053
Vat1l	546.465	4.85813	0.205963	23.5874	5.19619e-123	7.1954e-121	ENSRNOG00000011989	Significant	Upregulated	122.284	4.85523
Vav3	23.7488	3.26326	0.480871	6.78615	1.15166e-11	7.27974e-11	ENSRNOG00000020485	Significant	Upregulated	10.9387	2.07956
Vegfa	11611.7	3.40022	0.0555846	61.1719	1e-300	1e-300	ENSRNOG00000019598	Significant	Upregulated	300	17.9906
Vsir	104.073	3.12096	0.281798	11.0752	1.65588e-28	2.9603e-27	ENSRNOG00000000569	Significant	Upregulated	27.781	3.54864
Vstm2b	2.95957	-4.64626	1.4775	-3.14468	0.00166271	0.00413337	ENSRNOG00000017456	Significant	Downregulated	2.77918	0.676819
Vwa3b	3.31747	5.72395	1.58063	3.6213	0.000293122	0.000826365	ENSRNOG00000023566	Significant	Upregulated	3.53295	0.632658
Wdr95	7.30321	-3.30388	1.01535	-3.25392	0.00113824	0.00290699	ENSRNOG00000000904	Significant	Downregulated	2.94376	0.984879
Wdr97	14.0698	4.25101	0.743975	5.71391	1.10408e-08	5.40625e-08	ENSRNOG00000033520	Significant	Upregulated	7.957	1.34413
Wnt10b	9.34643	3.70054	0.769905	4.80649	1.53601e-06	5.91384e-06	ENSRNOG00000061238	Significant	Upregulated	5.81361	1.29886
Wnt4	13.0058	3.09583	0.615029	5.03363	4.81281e-07	1.97016e-06	ENSRNOG00000013166	Significant	Upregulated	6.3176	1.62594
Wwc1	13.4714	-3.06682	0.757555	-4.04831	5.15892e-05	0.00016545	ENSRNOG00000008065	Significant	Downregulated	4.28744	1.32004
Zap70	18.202	8.33518	1.25012	6.6675	2.60201e-11	1.59718e-10	ENSRNOG00000016995	Significant	Upregulated	10.5847	0.799922
Zc3h12a	606.685	3.89695	0.169891	22.9379	1.94418e-116	2.42503e-114	ENSRNOG00000009131	Significant	Upregulated	115.711	5.88613
Zfp395	938.55	3.4527	0.10368	33.3017	3.65156e-243	1.6574e-240	ENSRNOG00000014191	Significant	Upregulated	242.438	9.6451
Zfp69	97.0123	4.8194	0.338059	14.2561	4.10927e-46	1.33225e-44	ENSRNOG00000028662	Significant	Upregulated	45.3862	2.95806
Zswim5	10.3473	3.22415	0.661489	4.87407	1.0932e-06	4.28778e-06	ENSRNOG00000018160	Significant	Upregulated	5.9613	1.51174

## Sheet: Treatment vs Model
Gene_name	baseMean	log2FoldChange	lfcSE	stat	pvalue	padj	ID	Significant	Regulation	log_padj	1/lfcSE
Bnip3	6157.74	-4.66582	0.0823693	-56.6452	1e-300	1e-300	ENSRNOG00000017243	Significant	Downregulated	300	12.1404
C1s	1675.54	-4.40938	0.0924599	-47.6896	1e-300	1e-300	ENSRNOG00000011971	Significant	Downregulated	300	10.8155
Car9	2223.81	-4.21922	0.0979565	-43.0724	1e-300	1e-300	ENSRNOG00000017073	Significant	Downregulated	300	10.2086
Ccng2	1776.7	-3.74036	0.0965787	-38.7286	1e-300	1e-300	ENSRNOG00000002089	Significant	Downregulated	300	10.3542
Egln1	2738.75	-3.84251	0.101857	-37.7246	1e-300	1e-300	ENSRNOG00000063609	Significant	Downregulated	300	9.81771
Ero1a	22931.4	-5.95506	0.0851416	-69.943	1e-300	1e-300	ENSRNOG00000006462	Significant	Downregulated	300	11.7451
Gbe1	915.692	-3.73874	0.0968337	-38.6099	1e-300	1e-300	ENSRNOG00000051232	Significant	Downregulated	300	10.327
Higd1a	3158.71	-4.27173	0.105425	-40.519	1e-300	1e-300	ENSRNOG00000019428	Significant	Downregulated	300	9.48539
Hmox1	4690.32	-5.04976	0.119482	-42.2638	1e-300	1e-300	ENSRNOG00000014117	Significant	Downregulated	300	8.36946
Hsd11b1	938.908	-5.70694	0.144495	-39.4959	1e-300	1e-300	ENSRNOG00000005861	Significant	Downregulated	300	6.92067
Ndrg1	9508.25	-6.58108	0.130253	-50.5253	1e-300	1e-300	ENSRNOG00000007393	Significant	Downregulated	300	7.67735
P4ha2	10918	-3.3437	0.0568576	-58.8083	1e-300	1e-300	ENSRNOG00000033663	Significant	Downregulated	300	17.5878
Pgk1	27907.1	-3.85488	0.0828372	-46.5356	1e-300	1e-300	ENSRNOG00000058249	Significant	Downregulated	300	12.0719
Pygl	3494.83	-5.50576	0.127305	-43.2486	1e-300	1e-300	ENSRNOG00000006388	Significant	Downregulated	300	7.85515
Slc2a1	8386.57	-4.81074	0.0767203	-62.705	1e-300	1e-300	ENSRNOG00000007284	Significant	Downregulated	300	13.0344
Smox	1126.73	-4.43774	0.10944	-40.5495	1e-300	1e-300	ENSRNOG00000021255	Significant	Downregulated	300	9.13741
Vegfa	11611.7	-3.37006	0.0557276	-60.4739	1e-300	1e-300	ENSRNOG00000019598	Significant	Downregulated	300	17.9444
Ddit4	6312.5	-3.6171	0.0985462	-36.7047	6.15356e-295	4.38246e-292	ENSRNOG00000057078	Significant	Downregulated	294.211	10.1475
Hk2	1944.89	-3.51807	0.0973368	-36.1433	4.74095e-286	3.09505e-283	ENSRNOG00000006116	Significant	Downregulated	285.324	10.2736
Cox4i2	918.233	-4.87184	0.135479	-35.9602	3.50621e-283	2.19741e-280	ENSRNOG00000007827	Significant	Downregulated	282.455	7.38124
Mt2A	1242.54	-7.06338	0.199153	-35.4671	1.58148e-275	9.53026e-273	ENSRNOG00000043098	Significant	Downregulated	274.801	5.02126
Ndufa4l2	2065.43	-6.98448	0.199366	-35.0335	6.9562e-269	3.89249e-266	ENSRNOG00000031851	Significant	Downregulated	268.158	5.01591
Enpep	1149.11	-3.7	0.107216	-34.5098	5.70876e-261	3.08431e-258	ENSRNOG00000051854	Significant	Downregulated	260.243	9.327
Ier3	2290.68	-4.01444	0.118228	-33.9551	1.02441e-252	5.17758e-250	ENSRNOG00000000827	Significant	Downregulated	251.99	8.45824
Zfp395	938.55	-3.62041	0.106807	-33.8968	7.42511e-252	3.63552e-249	ENSRNOG00000014191	Significant	Downregulated	251.129	9.3627
Tmem45a	3721.75	-3.09825	0.0919814	-33.6834	1.01063e-248	4.79834e-246	ENSRNOG00000042975	Significant	Downregulated	247.995	10.8718
Aldoc	963.977	-4.9977	0.151377	-33.0148	4.9731e-239	2.10591e-236	ENSRNOG00000011452	Significant	Downregulated	238.303	6.60601
Actg2	1079.59	3.79834	0.127214	29.8579	6.94187e-196	2.1753e-193	ENSRNOG00000029401	Significant	Upregulated	195.159	7.86077
Kdm3a	2032.14	-3.19407	0.107063	-29.8337	1.42779e-195	4.3864e-193	ENSRNOG00000007814	Significant	Downregulated	194.845	9.34034
Fth1	18684.4	-3.26446	0.110372	-29.577	2.9558e-192	8.738e-190	ENSRNOG00000022619	Significant	Downregulated	191.529	9.06029
Eno2	6376.35	-3.64829	0.123625	-29.511	2.07889e-191	6.03186e-189	ENSRNOG00000013141	Significant	Downregulated	190.682	8.089
Rhbdf2	494.89	-3.96067	0.137653	-28.7728	4.69115e-182	1.31252e-179	ENSRNOG00000011459	Significant	Downregulated	181.329	7.26464
Id2	732.503	-4.74606	0.166338	-28.5327	4.6059e-179	1.24423e-176	ENSRNOG00000007237	Significant	Downregulated	178.337	6.01187
Nfkbiz	849.231	-4.91922	0.174921	-28.1225	5.19317e-174	1.33388e-171	ENSRNOG00000031163	Significant	Downregulated	173.285	5.71687
Gpi	12619.5	-3.27386	0.116758	-28.0397	5.33499e-173	1.3268e-170	ENSRNOG00000023150	Significant	Downregulated	172.273	8.56473
Fst	886.427	3.03802	0.110146	27.5818	1.84005e-167	4.43537e-165	ENSRNOG00000011631	Significant	Upregulated	166.735	9.07886
Bhlhe40	3386.83	-3.04735	0.110576	-27.559	3.45047e-167	8.1912e-165	ENSRNOG00000007152	Significant	Downregulated	166.462	9.04359
Car12	1193.79	-9.06231	0.336742	-26.9117	1.6006e-159	3.5826e-157	ENSRNOG00000017766	Significant	Downregulated	158.796	2.96963
Slc16a3	1889.48	-5.0343	0.188926	-26.6469	1.94372e-156	4.28933e-154	ENSRNOG00000036677	Significant	Downregulated	155.711	5.29307
Fam219a	895.872	-3.20399	0.120375	-26.6167	4.3466e-156	9.45868e-154	ENSRNOG00000039559	Significant	Downregulated	155.362	8.30737
Anpep	663.062	-3.25425	0.12243	-26.5804	1.14292e-155	2.45305e-153	ENSRNOG00000014610	Significant	Downregulated	154.942	8.1679
Slc2a3	6382.32	-4.98792	0.187874	-26.5492	2.62129e-155	5.55005e-153	ENSRNOG00000008376	Significant	Downregulated	154.581	5.3227
Tgfbr3	521.757	-3.54102	0.133871	-26.4509	3.56205e-154	7.44135e-152	ENSRNOG00000002093	Significant	Downregulated	153.448	7.46986
Maff	476.018	-3.34769	0.127187	-26.321	1.1037e-152	2.21703e-150	ENSRNOG00000012886	Significant	Downregulated	151.957	7.86243
Acp5	445.22	-4.24165	0.161637	-26.2417	8.88308e-152	1.73975e-149	ENSRNOG00000046261	Significant	Downregulated	151.051	6.18669
Qpct	399.246	-4.11517	0.157022	-26.2076	2.17572e-151	4.20853e-149	ENSRNOG00000005705	Significant	Downregulated	150.662	6.36854
Ell	1166.09	-3.06931	0.118285	-25.9483	1.8985e-148	3.62753e-146	ENSRNOG00000019824	Significant	Downregulated	147.722	8.45413
Ak4	1086.74	-4.63935	0.17939	-25.8619	1.78985e-147	3.37872e-145	ENSRNOG00000045738	Significant	Downregulated	146.747	5.57446
Thbs1	220645	3.06004	0.120828	25.3255	1.67254e-141	3.01211e-139	ENSRNOG00000045829	Significant	Upregulated	140.777	8.2762
Ntn1	535.212	-3.80816	0.151138	-25.1965	4.37446e-140	7.78852e-138	ENSRNOG00000003947	Significant	Downregulated	139.359	6.61645
Mgarp	322.26	-4.12304	0.164198	-25.1101	3.85884e-139	6.64399e-137	ENSRNOG00000011923	Significant	Downregulated	138.414	6.0902
Parm1	556.164	3.79424	0.151837	24.9888	8.08408e-138	1.37675e-135	ENSRNOG00000002579	Significant	Upregulated	137.092	6.58599
Npas2	462.447	-3.15752	0.128737	-24.5269	7.62191e-133	1.23114e-130	ENSRNOG00000013408	Significant	Downregulated	132.118	7.7678
Gsta1	351.299	-3.45354	0.142173	-24.2911	2.43241e-130	3.8111e-128	ENSRNOG00000013484	Significant	Downregulated	129.614	7.03369
Adm	408.621	-5.65887	0.2339	-24.1935	2.60353e-129	3.96041e-127	ENSRNOG00000027030	Significant	Downregulated	128.584	4.27533
Mtss1	491.459	-3.45274	0.144053	-23.9686	5.91364e-127	8.74103e-125	ENSRNOG00000009001	Significant	Downregulated	126.228	6.9419
Stc1	474.076	-4.15892	0.17413	-23.884	4.49004e-126	6.51388e-124	ENSRNOG00000015075	Significant	Downregulated	125.348	5.74284
Gsap	301.626	-5.69956	0.242434	-23.5098	3.23946e-122	4.45228e-120	ENSRNOG00000028801	Significant	Downregulated	121.49	4.12484
Vat1l	546.465	-4.94928	0.210674	-23.4927	4.8484e-122	6.60563e-120	ENSRNOG00000011989	Significant	Downregulated	121.314	4.74668
Itga8	1009.6	3.01835	0.130346	23.1563	1.25494e-118	1.59857e-116	ENSRNOG00000016538	Significant	Upregulated	117.901	7.67186
Tspo	1050.48	-3.00125	0.129859	-23.1116	3.53949e-118	4.47232e-116	ENSRNOG00000010549	Significant	Downregulated	117.451	7.70067
Akr1b8	799.28	-5.23453	0.227108	-23.0486	1.51834e-117	1.88804e-115	ENSRNOG00000027433	Significant	Downregulated	116.819	4.40319
Zc3h12a	606.685	-3.95183	0.172207	-22.9481	1.53783e-116	1.8824e-114	ENSRNOG00000009131	Significant	Downregulated	115.813	5.80696
Rgs11	365.547	-5.87016	0.256123	-22.9193	2.98558e-116	3.6262e-114	ENSRNOG00000066310	Significant	Downregulated	115.525	3.90437
Ppp1r3c	750.283	-3.3802	0.148307	-22.792	5.50783e-115	6.58753e-113	ENSRNOG00000018494	Significant	Downregulated	114.259	6.74278
Ppp1r3b	356.289	-4.82174	0.21354	-22.58	6.81877e-113	7.74178e-111	ENSRNOG00000011474	Significant	Downregulated	112.166	4.68295
Pnrc1	573.881	-3.0415	0.135194	-22.4973	4.40924e-112	4.93457e-110	ENSRNOG00000007793	Significant	Downregulated	111.356	7.39678
Lamb3	412.379	-3.81148	0.169964	-22.4252	2.23343e-111	2.4818e-109	ENSRNOG00000006025	Significant	Downregulated	110.651	5.88361
Ndrg2	572.307	-3.86228	0.17235	-22.4095	3.18316e-111	3.51224e-109	ENSRNOG00000010389	Significant	Downregulated	110.497	5.80213
G0s2	373.67	-4.63159	0.207509	-22.32	2.36278e-110	2.5531e-108	ENSRNOG00000006019	Significant	Downregulated	109.627	4.81908
Tnfaip3	689.864	-4.51377	0.202709	-22.2672	7.67948e-110	8.18518e-108	ENSRNOG00000049517	Significant	Downregulated	109.115	4.93318
Mmp9	490.908	-7.92271	0.359041	-22.0663	6.66206e-108	6.91266e-106	ENSRNOG00000017539	Significant	Downregulated	107.176	2.7852
Pfkp	2213.65	-3.50173	0.160663	-21.7955	2.55804e-105	2.60256e-103	ENSRNOG00000017163	Significant	Downregulated	104.592	6.22423
Tgm2	315.394	-5.59088	0.256985	-21.7556	6.11206e-105	6.17831e-103	ENSRNOG00000012956	Significant	Downregulated	104.214	3.89127
Apln	460.978	-4.95246	0.230101	-21.523	9.47814e-103	9.39895e-101	ENSRNOG00000003984	Significant	Downregulated	102.023	4.34593
Fosl1	224.021	-3.71221	0.174855	-21.2302	5.02316e-100	4.76987e-98	ENSRNOG00000020552	Significant	Downregulated	99.299	5.71902
Osr1	453.6	3.24869	0.156626	20.7417	1.45628e-95	1.26061e-93	ENSRNOG00000004210	Significant	Upregulated	94.8368	6.38463
Thsd4	386.862	-3.20484	0.155944	-20.5512	7.50859e-94	6.39373e-92	ENSRNOG00000053753	Significant	Downregulated	93.1244	6.41255
Hey1	318.806	4.05061	0.197391	20.5208	1.40443e-93	1.17672e-91	ENSRNOG00000062882	Significant	Upregulated	92.8525	5.0661
Ass1	544.045	-8.66415	0.429149	-20.1891	1.22041e-90	9.70631e-89	ENSRNOG00000008837	Significant	Downregulated	89.9135	2.33019
Angptl4	284.676	-4.92648	0.245036	-20.1052	6.6497e-90	5.262e-88	ENSRNOG00000007545	Significant	Downregulated	89.1772	4.08104
Stxbp5l	320.3	4.45724	0.224175	19.8828	5.72878e-88	4.35721e-86	ENSRNOG00000002496	Significant	Upregulated	87.2419	4.4608
Nxph4	255.486	-4.96491	0.251183	-19.7662	5.82514e-87	4.32551e-85	ENSRNOG00000025059	Significant	Downregulated	86.2347	3.98117
Smtnl2	350.793	-3.74841	0.190451	-19.6817	3.09286e-86	2.26443e-84	ENSRNOG00000015157	Significant	Downregulated	85.5096	5.25069
Sfrp2	1013.04	-3.14213	0.16125	-19.486	1.44233e-84	1.03189e-82	ENSRNOG00000009465	Significant	Downregulated	83.8409	6.20153
Acta2	57428.8	3.65126	0.187531	19.4702	1.96438e-84	1.399e-82	ENSRNOG00000058039	Significant	Upregulated	83.7068	5.33246
Stac2	226.913	-6.43334	0.331955	-19.3801	1.13558e-83	7.94298e-82	ENSRNOG00000004805	Significant	Downregulated	82.9448	3.01245
Itga10	358.321	-3.51845	0.183828	-19.14	1.17339e-81	8.06344e-80	ENSRNOG00000021217	Significant	Downregulated	80.9306	5.43988
Aox1	419.722	-3.30076	0.174087	-18.9604	3.62669e-80	2.42833e-78	ENSRNOG00000015354	Significant	Downregulated	79.4405	5.74424
Egln3	1215.77	-9.82552	0.521176	-18.8526	2.79809e-79	1.84981e-77	ENSRNOG00000005053	Significant	Downregulated	78.5531	1.91874
Car3	290.086	5.01291	0.267191	18.7615	1.55988e-78	1.0226e-76	ENSRNOG00000010079	Significant	Upregulated	77.8069	3.74263
Rab26	519.113	-3.11989	0.166338	-18.7564	1.71675e-78	1.12075e-76	ENSRNOG00000042086	Significant	Downregulated	77.7653	6.01187
Kbtbd11	304.87	-5.05274	0.269582	-18.7429	2.21249e-78	1.43245e-76	ENSRNOG00000012333	Significant	Downregulated	77.6551	3.70945
Stc2	1131.28	-3.01632	0.161403	-18.6882	6.17967e-78	3.98449e-76	ENSRNOG00000020729	Significant	Downregulated	77.209	6.19568
Tlr2	169.564	-4.79849	0.257076	-18.6656	9.42703e-78	6.05339e-76	ENSRNOG00000009822	Significant	Downregulated	77.0256	3.88989
Cacna1h	159.426	-4.48957	0.24058	-18.6614	1.01982e-77	6.52188e-76	ENSRNOG00000033893	Significant	Downregulated	76.9915	4.15661
Prom1	330.56	3.07004	0.166073	18.4861	2.67326e-76	1.66871e-74	ENSRNOG00000003098	Significant	Upregulated	75.573	6.02145
Panx3	273.558	4.35137	0.235413	18.484	2.77791e-76	1.72716e-74	ENSRNOG00000031675	Significant	Upregulated	75.5563	4.24786
Abca4	223.638	-5.63329	0.305112	-18.463	4.09678e-76	2.5271e-74	ENSRNOG00000012892	Significant	Downregulated	75.3876	3.27749
Rgs4	249.027	3.90546	0.214562	18.202	4.9727e-74	2.92903e-72	ENSRNOG00000002773	Significant	Upregulated	73.3034	4.66066
Prelid2	202.107	-3.25537	0.178898	-18.1968	5.47543e-74	3.20108e-72	ENSRNOG00000067168	Significant	Downregulated	73.2616	5.58976
Syt17	264.697	-3.47306	0.194952	-17.8149	5.41545e-71	3.06315e-69	ENSRNOG00000017136	Significant	Downregulated	70.2664	5.12946
Aph1b	244.837	-6.14598	0.345969	-17.7646	1.32996e-70	7.44209e-69	ENSRNOG00000027295	Significant	Downregulated	69.8762	2.89044
Ntrk1	309.182	-7.97051	0.450322	-17.6996	4.2252e-70	2.35589e-68	ENSRNOG00000013953	Significant	Downregulated	69.3742	2.22063
Gpat3	301.594	-3.51461	0.201055	-17.4809	2.0048e-68	1.09829e-66	ENSRNOG00000002159	Significant	Downregulated	67.6979	4.97376
Armh4	808.526	-3.21375	0.184988	-17.3727	1.32787e-67	7.14953e-66	ENSRNOG00000031849	Significant	Downregulated	66.8768	5.40574
Gch1	166.326	-5.26376	0.303309	-17.3544	1.82576e-67	9.76314e-66	ENSRNOG00000011039	Significant	Downregulated	66.7386	3.29697
Fam13a	192.441	-3.76175	0.217067	-17.3299	2.80034e-67	1.48229e-65	ENSRNOG00000007947	Significant	Downregulated	66.5528	4.60686
Kctd16	246.178	-3.29224	0.191209	-17.218	1.94444e-66	1.00215e-64	ENSRNOG00000069221	Significant	Downregulated	65.7112	5.22988
Abcg1	215.591	-3.199	0.186709	-17.1336	8.33136e-66	4.21083e-64	ENSRNOG00000001158	Significant	Downregulated	65.0793	5.35593
Cldn1	197.095	-5.88075	0.344078	-17.0913	1.72182e-65	8.66652e-64	ENSRNOG00000001926	Significant	Downregulated	64.764	2.90632
Lmod1	868.799	3.30788	0.193543	17.0912	1.72578e-65	8.66652e-64	ENSRNOG00000051548	Significant	Upregulated	64.763	5.16682
Pex26	322.533	-3.00915	0.176118	-17.086	1.88602e-65	9.44095e-64	ENSRNOG00000049982	Significant	Downregulated	64.7245	5.67802
Hopx	171.838	-3.37369	0.197991	-17.0396	4.17708e-65	2.07766e-63	ENSRNOG00000024689	Significant	Downregulated	64.3791	5.05073
Crlf1	269.038	-3.37015	0.197875	-17.0317	4.77801e-65	2.36157e-63	ENSRNOG00000020030	Significant	Downregulated	64.3208	5.05369
Ankrd37	248.585	-5.60596	0.329287	-17.0246	5.39823e-65	2.65973e-63	ENSRNOG00000031335	Significant	Downregulated	64.2677	3.03687
Tmem106a	165.958	-6.42621	0.379517	-16.9326	2.58673e-64	1.25476e-62	ENSRNOG00000023628	Significant	Downregulated	63.5872	2.63493
Colgalt2	231.224	-3.42673	0.202568	-16.9164	3.40462e-64	1.6363e-62	ENSRNOG00000028207	Significant	Downregulated	63.4679	4.9366
Ccl2	288.734	-7.62879	0.452889	-16.8447	1.14699e-63	5.46231e-62	ENSRNOG00000007159	Significant	Downregulated	62.9404	2.20805
Eif4e3	188.513	-3.38395	0.201557	-16.789	2.93673e-63	1.39011e-61	ENSRNOG00000010301	Significant	Downregulated	62.5321	4.96137
Rgs9	246.5	-7.6364	0.456713	-16.7203	9.31833e-63	4.33233e-61	ENSRNOG00000003800	Significant	Downregulated	62.0307	2.18956
Bcl3	160.787	-5.42328	0.325662	-16.6531	2.87373e-62	1.32428e-60	ENSRNOG00000043416	Significant	Downregulated	61.5416	3.07067
Adamts15	235.771	3.16279	0.192545	16.4262	1.24138e-60	5.62136e-59	ENSRNOG00000009892	Significant	Upregulated	59.9061	5.19358
Plekha2	114.768	-4.47318	0.27508	-16.2614	1.85417e-59	8.20653e-58	ENSRNOG00000066109	Significant	Downregulated	58.7319	3.63531
Heyl	228.616	5.44942	0.339263	16.0625	4.66992e-58	1.99913e-56	ENSRNOG00000015318	Significant	Upregulated	57.3307	2.94757
Lratd2	202.988	3.8386	0.239111	16.0536	5.39042e-58	2.29503e-56	ENSRNOG00000004744	Significant	Upregulated	57.2684	4.18216
Mt1	911.847	-5.66822	0.354559	-15.9867	1.58194e-57	6.64499e-56	ENSRNOG00000025764	Significant	Downregulated	56.8008	2.82041
Fhip1a	160.644	-3.09994	0.19465	-15.9258	4.19905e-57	1.7405e-55	ENSRNOG00000048256	Significant	Downregulated	56.3768	5.13743
Hpse	203.882	-4.81726	0.303574	-15.8685	1.04701e-56	4.29438e-55	ENSRNOG00000002188	Significant	Downregulated	55.98	3.29409
Fbxl21	155.17	-3.74776	0.236616	-15.839	1.67456e-56	6.81481e-55	ENSRNOG00000012168	Significant	Downregulated	55.7761	4.22625
Rrp12	396.937	3.16235	0.200615	15.7633	5.56778e-56	2.2311e-54	ENSRNOG00000048495	Significant	Upregulated	55.2543	4.98466
Ccdc181	201.703	-3.12451	0.198443	-15.7451	7.41784e-56	2.95732e-54	ENSRNOG00000002860	Significant	Downregulated	55.1297	5.03923
Arrdc4	670.705	-3.12019	0.198306	-15.7342	8.81619e-56	3.49701e-54	ENSRNOG00000010775	Significant	Downregulated	55.0547	5.0427
Map7	150.973	-6.67127	0.432373	-15.4294	1.0376e-53	3.95549e-52	ENSRNOG00000012701	Significant	Downregulated	52.984	2.31282
Adh7	524.301	-3.18204	0.207506	-15.3347	4.48264e-53	1.70058e-51	ENSRNOG00000032959	Significant	Downregulated	52.3485	4.81914
Pglyrp1	128.72	-4.63793	0.307139	-15.1004	1.60924e-51	5.73034e-50	ENSRNOG00000013395	Significant	Downregulated	50.7934	3.25585
Pla2g7	143.803	-4.17517	0.278513	-14.9909	8.41572e-51	2.92367e-49	ENSRNOG00000025691	Significant	Downregulated	50.0749	3.5905
Myh1	157.527	3.88592	0.260722	14.9045	3.08265e-50	1.05919e-48	ENSRNOG00000049695	Significant	Upregulated	49.5111	3.83551
Mmp3	123.845	-4.24923	0.287547	-14.7775	2.04611e-49	6.83549e-48	ENSRNOG00000032626	Significant	Downregulated	48.6891	3.47769
Upp1	157.286	-4.41631	0.304956	-14.4818	1.57927e-47	5.01908e-46	ENSRNOG00000004972	Significant	Downregulated	46.8015	3.27916
Trim7	226.513	-3.48021	0.24285	-14.3307	1.40677e-46	4.40768e-45	ENSRNOG00000002469	Significant	Downregulated	45.8518	4.11777
Cxcl16	139.6	-3.08989	0.215856	-14.3146	1.77412e-46	5.51526e-45	ENSRNOG00000026647	Significant	Downregulated	45.751	4.63271
Dusp4	111.223	-5.25406	0.371365	-14.148	1.92184e-45	5.82426e-44	ENSRNOG00000011921	Significant	Downregulated	44.7163	2.69277
Pgk1l1	103.598	-4.462	0.315722	-14.1327	2.3875e-45	7.2215e-44	ENSRNOG00000026928	Significant	Downregulated	44.6221	3.16735
Ifitm10	99.3197	-3.8689	0.276305	-14.0023	1.50925e-44	4.44492e-43	ENSRNOG00000020164	Significant	Downregulated	43.8212	3.6192
Rasl12	219.799	-3.91089	0.279819	-13.9765	2.16897e-44	6.36392e-43	ENSRNOG00000032339	Significant	Downregulated	43.6637	3.57374
Cebpd	602.36	-3.37551	0.24326	-13.8761	8.84207e-44	2.54664e-42	ENSRNOG00000050869	Significant	Downregulated	43.0534	4.11082
Tmem151a	167.075	-3.17567	0.230421	-13.7821	3.26807e-43	9.30985e-42	ENSRNOG00000049951	Significant	Downregulated	42.4857	4.33989
Palmd	222.812	3.0827	0.224673	13.7208	7.62151e-43	2.13239e-41	ENSRNOG00000058609	Significant	Upregulated	42.118	4.45091
Zfp69	97.0123	-4.28817	0.312869	-13.706	9.35294e-43	2.61216e-41	ENSRNOG00000028662	Significant	Downregulated	42.0291	3.19622
Irag1	151.27	3.38341	0.247445	13.6734	1.46432e-42	4.06789e-41	ENSRNOG00000017767	Significant	Upregulated	41.8344	4.04131
Myh2	120.656	4.58857	0.336547	13.6343	2.50483e-42	6.87314e-41	ENSRNOG00000065740	Significant	Upregulated	41.6012	2.97136
Phf24	105.379	-5.33884	0.395669	-13.4932	1.71472e-41	4.56909e-40	ENSRNOG00000000129	Significant	Downregulated	40.7658	2.52737
Mapt	86.0469	-5.45583	0.405721	-13.4473	3.19531e-41	8.42831e-40	ENSRNOG00000005133	Significant	Downregulated	40.4955	2.46475
Syk	85.2465	-4.89739	0.368464	-13.2914	2.5971e-40	6.70369e-39	ENSRNOG00000012160	Significant	Downregulated	39.5855	2.71397
Hap1	114.645	-3.29866	0.250739	-13.1558	1.57705e-39	3.94715e-38	ENSRNOG00000014819	Significant	Downregulated	38.8022	3.98821
Dcx	156.467	3.24263	0.247835	13.0838	4.07495e-39	1.01343e-37	ENSRNOG00000047712	Significant	Upregulated	38.3899	4.03494
Fam81a	139.658	3.11365	0.239341	13.0093	1.08362e-38	2.66534e-37	ENSRNOG00000057501	Significant	Upregulated	37.9651	4.17814
Ptgs2	3367.64	-3.88604	0.302834	-12.8322	1.08216e-37	2.59651e-36	ENSRNOG00000002525	Significant	Downregulated	36.9657	3.30214
Sptbn2	114.61	-3.14986	0.246707	-12.7676	2.4864e-37	5.89364e-36	ENSRNOG00000058842	Significant	Downregulated	36.6044	4.05339
Mmp13	456.18	-6.02083	0.480594	-12.5279	5.25371e-36	1.19125e-34	ENSRNOG00000008478	Significant	Downregulated	35.2795	2.08076
Cx3cl1	90.9882	-3.605	0.288401	-12.5	7.46791e-36	1.68842e-34	ENSRNOG00000016326	Significant	Downregulated	35.1268	3.4674
Gpr146	117.361	-5.7293	0.459571	-12.4666	1.1354e-35	2.54863e-34	ENSRNOG00000001288	Significant	Downregulated	34.9449	2.17594
RT1-CE11	66.4499	-4.81979	0.387625	-12.4342	1.70523e-35	3.79511e-34	ENSRNOG00000038999	Significant	Downregulated	34.7682	2.57981
Mindy2	204.084	-3.40109	0.27369	-12.4268	1.86942e-35	4.15462e-34	ENSRNOG00000061337	Significant	Downregulated	34.7283	3.65377
Map3k8	118.952	-3.45073	0.282568	-12.212	2.68085e-34	5.7539e-33	ENSRNOG00000016378	Significant	Downregulated	33.5717	3.53897
Bdkrb2	146.549	-3.60894	0.296175	-12.1852	3.72896e-34	7.94903e-33	ENSRNOG00000047300	Significant	Downregulated	33.4284	3.37639
Cxcl1	720.575	-9.18992	0.754546	-12.1794	4.00197e-34	8.47336e-33	ENSRNOG00000002802	Significant	Downregulated	33.3977	1.3253
Gas7	531.591	-4.42067	0.364923	-12.114	8.90898e-34	1.85373e-32	ENSRNOG00000049361	Significant	Downregulated	33.0502	2.7403
Apol7al1	77.8565	-3.84913	0.317754	-12.1136	8.95296e-34	1.86041e-32	ENSRNOG00000052981	Significant	Downregulated	33.048	3.14709
Rnf152	116.554	-7.43138	0.618242	-12.0202	2.78349e-33	5.64919e-32	ENSRNOG00000014859	Significant	Downregulated	32.5554	1.61749
Fgf11	76.167	-4.36856	0.365862	-11.9405	7.2798e-33	1.46231e-31	ENSRNOG00000014882	Significant	Downregulated	32.1379	2.73327
Cyp26b1	123.369	-3.20998	0.270234	-11.8785	1.5306e-32	3.04334e-31	ENSRNOG00000015076	Significant	Downregulated	31.8151	3.70049
Myh3	100.156	5.28838	0.451201	11.7207	9.98625e-32	1.93405e-30	ENSRNOG00000046276	Significant	Upregulated	31.0006	2.21631
Atp7b	82.2	-4.85199	0.418538	-11.5927	4.48767e-31	8.4207e-30	ENSRNOG00000012878	Significant	Downregulated	30.348	2.38927
Pla2g2a	318.253	-7.67141	0.665116	-11.5339	8.89813e-31	1.64989e-29	ENSRNOG00000016945	Significant	Downregulated	30.0507	1.5035
Tmem255b	486.25	-8.1701	0.708943	-11.5243	9.94643e-31	1.83991e-29	ENSRNOG00000026336	Significant	Downregulated	30.0023	1.41055
Cda	75.325	-4.4653	0.387931	-11.5106	1.16728e-30	2.14911e-29	ENSRNOG00000015677	Significant	Downregulated	29.9328	2.57778
Khdrbs2	91.0005	3.39561	0.297574	11.411	3.68668e-30	6.67008e-29	ENSRNOG00000012284	Significant	Upregulated	29.4334	3.3605
Stap2	89.7712	-7.02913	0.619476	-11.3469	7.68438e-30	1.37756e-28	ENSRNOG00000047306	Significant	Downregulated	29.1144	1.61427
Mgp	7437.39	-3.11936	0.275669	-11.3156	1.09868e-29	1.95393e-28	ENSRNOG00000005695	Significant	Downregulated	28.9591	3.62754
Tmem74b	95.3838	-3.72334	0.329524	-11.2991	1.32513e-29	2.34336e-28	ENSRNOG00000064442	Significant	Downregulated	28.8777	3.03468
Cacna1i	71.0285	-3.3647	0.299883	-11.22	3.25096e-29	5.65956e-28	ENSRNOG00000060407	Significant	Downregulated	28.488	3.33464
Mmp12	59.7994	-3.87353	0.345519	-11.2108	3.61061e-29	6.27173e-28	ENSRNOG00000030187	Significant	Downregulated	28.4424	2.8942
RT1-S3	104.474	-3.28545	0.29618	-11.0927	1.36048e-28	2.29947e-27	ENSRNOG00000000777	Significant	Downregulated	27.8663	3.37633
Fcgr2a	54.1691	-4.8165	0.44307	-10.8708	1.58871e-27	2.58215e-26	ENSRNOG00000049422	Significant	Downregulated	26.799	2.25698
Fcgr2al1	54.1691	-4.8165	0.44307	-10.8708	1.58871e-27	2.58215e-26	ENSRNOG00000046663	Significant	Downregulated	26.799	2.25698
Rbp1	73.2152	-6.52299	0.600453	-10.8635	1.72104e-27	2.79433e-26	ENSRNOG00000013794	Significant	Downregulated	26.7642	1.66541
Rassf7	53.3736	-3.50946	0.323694	-10.8419	2.17856e-27	3.51574e-26	ENSRNOG00000017109	Significant	Downregulated	26.6618	3.08934
Lcn2	892.369	-12.8632	1.18909	-10.8177	2.83893e-27	4.54345e-26	ENSRNOG00000013973	Significant	Downregulated	26.5468	0.840978
Hvcn1	80.1225	-3.29213	0.305994	-10.7588	5.38645e-27	8.45641e-26	ENSRNOG00000001270	Significant	Downregulated	26.2687	3.26804
C3	806.816	-12.7173	1.18475	-10.7342	7.0351e-27	1.0985e-25	ENSRNOG00000046834	Significant	Downregulated	26.1527	0.844062
Map3k9	53.5412	-3.67068	0.343104	-10.6984	1.03506e-26	1.58527e-25	ENSRNOG00000007271	Significant	Downregulated	25.985	2.91457
Osgin1	65.6381	-3.5297	0.332387	-10.6192	2.42515e-26	3.65358e-25	ENSRNOG00000014948	Significant	Downregulated	25.6153	3.00854
Cyp4b1	131.519	-8.17726	0.772624	-10.5837	3.54502e-26	5.28984e-25	ENSRNOG00000055078	Significant	Downregulated	25.4504	1.29429
Rasgrf1	62.7556	-4.20868	0.398999	-10.5481	5.18289e-26	7.6609e-25	ENSRNOG00000014025	Significant	Downregulated	25.2854	2.50627
Mturn	121.114	-3.59705	0.341544	-10.5317	6.16993e-26	9.07703e-25	ENSRNOG00000010205	Significant	Downregulated	25.2097	2.92788
Ppp1r3g	44.965	-4.83978	0.46664	-10.3715	3.34065e-25	4.74535e-24	ENSRNOG00000016222	Significant	Downregulated	24.4762	2.14298
Chi3l1	51.852	-4.5909	0.444344	-10.3319	5.05708e-25	7.14466e-24	ENSRNOG00000053272	Significant	Downregulated	24.2961	2.25051
Epor	67.3772	-6.00202	0.582061	-10.3117	6.24092e-25	8.75405e-24	ENSRNOG00000012619	Significant	Downregulated	24.2048	1.71803
Ccdc3	941.349	3.59555	0.349342	10.2924	7.62743e-25	1.06512e-23	ENSRNOG00000017933	Significant	Upregulated	24.1176	2.86253
Ppm1j	63.8992	-3.3503	0.326183	-10.2712	9.49702e-25	1.32148e-23	ENSRNOG00000012481	Significant	Downregulated	24.0224	3.06577
Echdc2	79.8849	-3.33062	0.325196	-10.2419	1.28705e-24	1.76272e-23	ENSRNOG00000029333	Significant	Downregulated	23.8904	3.07507
Prr15	51.5624	-4.40307	0.434373	-10.1366	3.80099e-24	5.06411e-23	ENSRNOG00000009564	Significant	Downregulated	23.4201	2.30217
Mcf2	76.6559	5.64005	0.575697	9.7969	1.16091e-22	1.43788e-21	ENSRNOG00000003435	Significant	Upregulated	21.9352	1.73702
Cnn1	2133.26	3.41521	0.350373	9.74736	1.89319e-22	2.32101e-21	ENSRNOG00000027736	Significant	Upregulated	21.7228	2.8541
Nr4a3	140.588	-3.05706	0.313816	-9.74159	2.00385e-22	2.45092e-21	ENSRNOG00000005964	Significant	Downregulated	21.6981	3.18659
Kif1a	59.7423	-3.31787	0.344137	-9.64112	5.36025e-22	6.41592e-21	ENSRNOG00000023993	Significant	Downregulated	21.2708	2.90582
Klhdc8a	107.152	-3.13953	0.326756	-9.60819	7.38381e-22	8.73788e-21	ENSRNOG00000000036	Significant	Downregulated	21.1317	3.06039
P2rx6	41.532	-4.22852	0.447525	-9.44868	3.43136e-21	3.89301e-20	ENSRNOG00000001873	Significant	Downregulated	20.4645	2.23451
Kcnn4	51.5142	-3.80338	0.404855	-9.39444	5.75249e-21	6.42868e-20	ENSRNOG00000019440	Significant	Downregulated	20.2401	2.47002
Psmb8	62.3055	-3.3747	0.361262	-9.34144	9.50307e-21	1.04708e-19	ENSRNOG00000000456	Significant	Downregulated	20.0221	2.76808
Ms4a7	52.6439	4.10218	0.439798	9.32742	1.08484e-20	1.18862e-19	ENSRNOG00000020953	Significant	Upregulated	19.9646	2.27377
Gucy1a1	71.4581	3.37883	0.366397	9.22177	2.92245e-20	3.12552e-19	ENSRNOG00000012302	Significant	Upregulated	19.5343	2.72928
Slc35f1	60.6749	3.64503	0.397381	9.17265	4.61526e-20	4.86621e-19	ENSRNOG00000000412	Significant	Upregulated	19.3358	2.51648
Nbeal2	77.6819	-3.4975	0.382646	-9.1403	6.22776e-20	6.50944e-19	ENSRNOG00000027880	Significant	Downregulated	19.2057	2.61338
Bend5	62.0566	-3.46803	0.380553	-9.11314	8.00285e-20	8.32041e-19	ENSRNOG00000008025	Significant	Downregulated	19.0968	2.62775
Notch4	105.744	-3.28531	0.365161	-8.99687	2.32246e-19	2.36595e-18	ENSRNOG00000000442	Significant	Downregulated	18.6341	2.73852
Acap1	32.7148	-4.65951	0.519247	-8.9736	2.86966e-19	2.90827e-18	ENSRNOG00000015674	Significant	Downregulated	18.5422	1.92587
Serpina3a	109.527	-8.35317	0.933231	-8.95081	3.52878e-19	3.54416e-18	ENSRNOG00000048191	Significant	Downregulated	18.4524	1.07155
Serpina3n	109.527	-8.35317	0.933231	-8.95081	3.52878e-19	3.54416e-18	ENSRNOG00000029949	Significant	Downregulated	18.4524	1.07155
Nfkbia	659.368	-3.51465	0.393206	-8.93845	3.94684e-19	3.9539e-18	ENSRNOG00000007390	Significant	Downregulated	18.4038	2.54319
Ret	236.188	-10.9427	1.22787	-8.91198	5.01291e-19	4.98998e-18	ENSRNOG00000014751	Significant	Downregulated	18.2999	0.814421
Filip1	51.7002	3.63368	0.410378	8.85446	8.40923e-19	8.21933e-18	ENSRNOG00000011521	Significant	Upregulated	18.0752	2.43678
Tent5c	84.4998	-3.40739	0.384988	-8.85062	8.70305e-19	8.50121e-18	ENSRNOG00000070242	Significant	Downregulated	18.0603	2.59748
Frzb	46.2217	-3.77946	0.427607	-8.83864	9.68919e-19	9.42335e-18	ENSRNOG00000007765	Significant	Downregulated	18.0137	2.3386
Ptprz1	39.6988	-3.63947	0.419015	-8.68576	3.76233e-18	3.52772e-17	ENSRNOG00000006030	Significant	Downregulated	17.4245	2.38655
RT1-CE2	40.944	-3.33812	0.385563	-8.65778	4.81033e-18	4.46759e-17	ENSRNOG00000047706	Significant	Downregulated	17.3178	2.59361
Lrrc23	59.2231	-3.02346	0.349351	-8.65452	4.94989e-18	4.59143e-17	ENSRNOG00000026309	Significant	Downregulated	17.3054	2.86245
Cd28	41.7372	-3.43006	0.396698	-8.64652	5.30932e-18	4.91066e-17	ENSRNOG00000010283	Significant	Downregulated	17.275	2.52081
Tmem61	36.1982	-4.04824	0.470013	-8.61302	7.116e-18	6.54304e-17	ENSRNOG00000026594	Significant	Downregulated	17.1478	2.1276
Slc1a1	31.509	-4.71631	0.549942	-8.57601	9.82193e-18	8.9523e-17	ENSRNOG00000014816	Significant	Downregulated	17.0078	1.81837
Mfsd2a	59.2622	5.31135	0.6291	8.44277	3.09892e-17	2.76188e-16	ENSRNOG00000014008	Significant	Upregulated	16.5088	1.58957
Bdkrb1	32.8805	-4.47907	0.530531	-8.44261	3.10327e-17	2.76419e-16	ENSRNOG00000004488	Significant	Downregulated	16.5082	1.8849
Lrpl1	40.6154	-6.11186	0.733634	-8.33093	8.02069e-17	6.98157e-16	ENSRNOG00000054809	Significant	Downregulated	16.0958	1.36308
Clstn3	36.2098	-4.52617	0.545975	-8.29008	1.13174e-16	9.78594e-16	ENSRNOG00000011156	Significant	Downregulated	15.9463	1.83159
Dchs2	31.2997	-3.87644	0.47328	-8.19058	2.59965e-16	2.21246e-15	ENSRNOG00000047473	Significant	Downregulated	15.5851	2.11292
Chrne	30.1068	-3.98432	0.486934	-8.18245	2.78128e-16	2.3619e-15	ENSRNOG00000003777	Significant	Downregulated	15.5558	2.05367
Nefh	30.148	-5.19896	0.636851	-8.16355	3.25327e-16	2.74487e-15	ENSRNOG00000008716	Significant	Downregulated	15.4877	1.57023
Ticam2	64.8525	-3.59575	0.441005	-8.15355	3.53399e-16	2.97531e-15	ENSRNOG00000042070	Significant	Downregulated	15.4517	2.26755
RT1-CE1	49.031	-3.52024	0.442829	-7.94942	1.87386e-15	1.50871e-14	ENSRNOG00000030712	Significant	Downregulated	14.7273	2.25821
Nos2	129.55	-11.0414	1.39019	-7.94233	1.98417e-15	1.59507e-14	ENSRNOG00000057443	Significant	Downregulated	14.7024	0.719325
Kctd11	737.83	-3.33569	0.420932	-7.92453	2.29013e-15	1.82977e-14	ENSRNOG00000015669	Significant	Downregulated	14.6401	2.37568
Necab1	45.0439	3.07519	0.389319	7.89889	2.81395e-15	2.23752e-14	ENSRNOG00000066027	Significant	Upregulated	14.5507	2.56859
Gipr	34.9798	-6.25108	0.795143	-7.86158	3.79326e-15	2.99561e-14	ENSRNOG00000015860	Significant	Downregulated	14.421	1.25763
Arhgdib	30.3508	-3.85909	0.491103	-7.858	3.90309e-15	3.08079e-14	ENSRNOG00000005809	Significant	Downregulated	14.4086	2.03623
Etnppl	28.1017	-3.8704	0.501187	-7.72248	1.14092e-14	8.67342e-14	ENSRNOG00000045743	Significant	Downregulated	13.9427	1.99526
Rnf144b	39.4416	-3.77652	0.490056	-7.7063	1.29518e-14	9.80329e-14	ENSRNOG00000016123	Significant	Downregulated	13.8877	2.04058
Ccl7	84.0946	-9.45004	1.22801	-7.69542	1.41031e-14	1.06388e-13	ENSRNOG00000000239	Significant	Downregulated	13.8507	0.814326
Akr1c15	28.4881	-4.57828	0.594997	-7.69463	1.41905e-14	1.06996e-13	ENSRNOG00000021735	Significant	Downregulated	13.848	1.68068
Rragd	28.2202	-4.90572	0.639667	-7.66917	1.73115e-14	1.2953e-13	ENSRNOG00000007331	Significant	Downregulated	13.7617	1.56331
Serinc2	25.4032	-3.88703	0.507716	-7.65592	1.91939e-14	1.43273e-13	ENSRNOG00000012989	Significant	Downregulated	13.7168	1.96961
Epn3	37.6363	-4.20616	0.55329	-7.60208	2.91407e-14	2.14557e-13	ENSRNOG00000003284	Significant	Downregulated	13.5355	1.80737
Acta1	54.0234	3.08614	0.406078	7.59986	2.96458e-14	2.18173e-13	ENSRNOG00000017786	Significant	Upregulated	13.528	2.46258
Brdt	27.9653	-3.39557	0.448483	-7.57123	3.69708e-14	2.69422e-13	ENSRNOG00000002073	Significant	Downregulated	13.4321	2.22974
Gbp7	32.0209	-3.36854	0.447137	-7.53358	4.9366e-14	3.56601e-13	ENSRNOG00000029191	Significant	Downregulated	13.3066	2.23645
Ccl20	396.938	-3.22692	0.429558	-7.51218	5.81506e-14	4.18513e-13	ENSRNOG00000015992	Significant	Downregulated	13.2354	2.32797
Serpinb2	62.0928	-3.32347	0.44919	-7.39882	1.37402e-13	9.57655e-13	ENSRNOG00000002460	Significant	Downregulated	12.862	2.22623
Steap4	35.432	-9.16423	1.24669	-7.35087	1.96921e-13	1.35979e-12	ENSRNOG00000008602	Significant	Downregulated	12.7057	0.802127
P3h2	24.0745	-3.96884	0.541358	-7.33126	2.27992e-13	1.56537e-12	ENSRNOG00000055751	Significant	Downregulated	12.6421	1.84721
Cyp1a1	40.1089	-5.8534	0.799128	-7.32473	2.3938e-13	1.63982e-12	ENSRNOG00000019500	Significant	Downregulated	12.6209	1.25136
Plvap	29.1074	-8.88765	1.21826	-7.29539	2.97805e-13	2.0173e-12	ENSRNOG00000017676	Significant	Downregulated	12.5261	0.820845
Dmrt2	43.3755	3.19898	0.439105	7.28524	3.21106e-13	2.16764e-12	ENSRNOG00000016301	Significant	Upregulated	12.4934	2.27736
Plxdc1	32.9537	-3.49326	0.48174	-7.25134	4.1266e-13	2.75599e-12	ENSRNOG00000021536	Significant	Downregulated	12.3844	2.07581
Otop1	23.9396	-5.32618	0.737931	-7.21772	5.28682e-13	3.50249e-12	ENSRNOG00000028423	Significant	Downregulated	12.2768	1.35514
Vav3	23.7488	-4.20002	0.582847	-7.20604	5.76015e-13	3.80802e-12	ENSRNOG00000020485	Significant	Downregulated	12.2396	1.71572
Insrr	28.5413	-8.8367	1.22795	-7.19632	6.18603e-13	4.08096e-12	ENSRNOG00000057702	Significant	Downregulated	12.2086	0.814367
Rasd1	34.0426	-3.80666	0.52964	-7.18726	6.6106e-13	4.35371e-12	ENSRNOG00000003348	Significant	Downregulated	12.1798	1.88807
Il34	21.8272	-4.12705	0.574655	-7.18178	6.8812e-13	4.52433e-12	ENSRNOG00000017602	Significant	Downregulated	12.1623	1.74017
Efnb3	31.1879	-3.73407	0.523814	-7.12862	1.01381e-12	6.57466e-12	ENSRNOG00000010320	Significant	Downregulated	11.994	1.90908
Kiaa1755	25.6851	-5.44152	0.764853	-7.11446	1.12352e-12	7.25309e-12	ENSRNOG00000014424	Significant	Downregulated	11.9494	1.30744
Sncb	27.2909	-8.79134	1.23978	-7.09107	1.33075e-12	8.55569e-12	ENSRNOG00000018039	Significant	Downregulated	11.8759	0.806598
Klhl32	41.5297	-7.51822	1.06154	-7.08235	1.41731e-12	9.07866e-12	ENSRNOG00000007441	Significant	Downregulated	11.8485	0.942025
Gucy1b1	33.5808	3.24672	0.462537	7.01936	2.22883e-12	1.4121e-11	ENSRNOG00000012060	Significant	Upregulated	11.6519	2.16199
Dapk1	29.7811	-3.22137	0.45942	-7.01181	2.35258e-12	1.4857e-11	ENSRNOG00000018198	Significant	Downregulated	11.6285	2.17666
Irf6	23.2361	-3.62246	0.519926	-6.96726	3.23181e-12	2.01898e-11	ENSRNOG00000005082	Significant	Downregulated	11.4906	1.92335
Olr1	24.2343	-3.37515	0.489775	-6.89122	5.53178e-12	3.38827e-11	ENSRNOG00000056219	Significant	Downregulated	11.2571	2.04175
Kcnn3	21.0754	-3.92956	0.572195	-6.86752	6.5328e-12	3.98117e-11	ENSRNOG00000020706	Significant	Downregulated	11.1849	1.74766
Evpl	24.7026	-3.96028	0.578793	-6.84231	7.79238e-12	4.71758e-11	ENSRNOG00000009343	Significant	Downregulated	11.1083	1.72773
Kcnt1	41.8201	-7.52706	1.1111	-6.77442	1.24907e-11	7.44406e-11	ENSRNOG00000017283	Significant	Downregulated	10.9034	0.900009
Lrrn4	27.1841	-3.30082	0.492048	-6.70833	1.96861e-11	1.15912e-10	ENSRNOG00000032989	Significant	Downregulated	10.7058	2.03232
C3h15orf48	23.5739	-4.17529	0.623401	-6.6976	2.11874e-11	1.24424e-10	ENSRNOG00000067060	Significant	Downregulated	10.6739	1.6041
Abhd15	28.6381	-3.51081	0.524766	-6.69024	2.22803e-11	1.30646e-10	ENSRNOG00000015002	Significant	Downregulated	10.6521	1.90561
Adh1c	32.6281	-7.17685	1.07313	-6.6878	2.26557e-11	1.32749e-10	ENSRNOG00000012436	Significant	Downregulated	10.6448	0.931856
Adh6	32.6281	-7.17685	1.07313	-6.6878	2.26557e-11	1.32749e-10	ENSRNOG00000069176	Significant	Downregulated	10.6448	0.931856
Ngef	29.8572	-3.08304	0.463931	-6.64548	3.02241e-11	1.76041e-10	ENSRNOG00000016653	Significant	Downregulated	10.5196	2.15549
Liph	41.952	-7.5416	1.14016	-6.61451	3.72775e-11	2.15681e-10	ENSRNOG00000047894	Significant	Downregulated	10.4286	0.87707
Tnfsf15	23.4661	-3.14156	0.476213	-6.59697	4.1965e-11	2.41998e-10	ENSRNOG00000008930	Significant	Downregulated	10.3771	2.0999
Cxcl3	30.4708	-7.07541	1.07331	-6.59216	4.33461e-11	2.49778e-10	ENSRNOG00000028043	Significant	Downregulated	10.3631	0.931701
RT1-CE14	29.227	-3.34791	0.508016	-6.59017	4.39335e-11	2.52977e-10	ENSRNOG00000066181	Significant	Downregulated	10.3572	1.96844
Zap70	18.202	-8.20805	1.25012	-6.56578	5.17602e-11	2.9641e-10	ENSRNOG00000016995	Significant	Downregulated	10.286	0.79992
Kcnc3	26.3961	-4.47554	0.68184	-6.56391	5.24159e-11	2.99946e-10	ENSRNOG00000019959	Significant	Downregulated	10.2805	1.46662
Pcdh1	20.6204	-4.10795	0.627169	-6.54999	5.75409e-11	3.27479e-10	ENSRNOG00000060410	Significant	Downregulated	10.24	1.59447
Nod2	17.5546	-3.95886	0.607407	-6.51764	7.14233e-11	4.03265e-10	ENSRNOG00000014124	Significant	Downregulated	10.1462	1.64634
Il1b	18.6111	-8.23919	1.27562	-6.45897	1.05417e-10	5.86324e-10	ENSRNOG00000004649	Significant	Downregulated	9.97709	0.783932
Syngr3	28.123	-3.00804	0.466094	-6.45372	1.09141e-10	6.05744e-10	ENSRNOG00000012620	Significant	Downregulated	9.96201	2.14549
Scn7a	40.9195	-3.5559	0.557135	-6.38248	1.74243e-10	9.53558e-10	ENSRNOG00000029342	Significant	Downregulated	9.75884	1.7949
RT1-CE16	25.5971	-4.0818	0.640342	-6.37441	1.83673e-10	1.00306e-09	ENSRNOG00000065254	Significant	Downregulated	9.73595	1.56167
Fgfr4	40.3274	3.07479	0.486006	6.32665	2.50547e-10	1.34992e-09	ENSRNOG00000016763	Significant	Upregulated	9.60111	2.05759
Cxcl2	15.3362	-7.96295	1.25906	-6.32451	2.54035e-10	1.3673e-09	ENSRNOG00000002792	Significant	Downregulated	9.59511	0.794242
Amn	18.0677	-4.93907	0.787748	-6.26986	3.61372e-10	1.91154e-09	ENSRNOG00000009050	Significant	Downregulated	9.44205	1.26944
Ttc23l	26.4256	-6.84562	1.09443	-6.25495	3.97653e-10	2.09849e-09	ENSRNOG00000055986	Significant	Downregulated	9.4005	0.913715
Klhl40	28.5378	-3.62692	0.585828	-6.19111	5.97406e-10	3.1035e-09	ENSRNOG00000019390	Significant	Downregulated	9.22373	1.70699
She	27.0872	-7.70884	1.24706	-6.1816	6.34534e-10	3.28548e-09	ENSRNOG00000020797	Significant	Downregulated	9.19755	0.801886
Gria2	25.6482	3.75833	0.608825	6.17308	6.69731e-10	3.45859e-09	ENSRNOG00000054204	Significant	Upregulated	9.1741	1.64251
Cxcl6	78.108	-10.3113	1.67411	-6.15931	7.3064e-10	3.76692e-09	ENSRNOG00000002843	Significant	Downregulated	9.1363	0.597334
Kcna2	24.9589	-3.13914	0.512444	-6.12582	9.022e-10	4.61648e-09	ENSRNOG00000018285	Significant	Downregulated	9.0447	1.95143
C1ql4	22.8972	-7.53346	1.23246	-6.11256	9.80441e-10	4.99725e-09	ENSRNOG00000060020	Significant	Downregulated	9.00858	0.811388
Kcna3	23.2715	-4.70621	0.772741	-6.09028	1.12715e-09	5.71156e-09	ENSRNOG00000062002	Significant	Downregulated	8.94802	1.29409
C10h16orf89	23.4844	-7.6068	1.25113	-6.07992	1.20244e-09	6.07542e-09	ENSRNOG00000021796	Significant	Downregulated	8.91994	0.799274
Aldh3a1	123.619	-3.81317	0.628468	-6.0674	1.29994e-09	6.55534e-09	ENSRNOG00000002331	Significant	Downregulated	8.88608	1.59117
Cpne5	13.758	-7.75954	1.27951	-6.06446	1.32395e-09	6.66569e-09	ENSRNOG00000000522	Significant	Downregulated	8.87813	0.78155
Slc6a7	27.453	3.2064	0.528778	6.06379	1.32952e-09	6.69161e-09	ENSRNOG00000018644	Significant	Upregulated	8.8763	1.89115
Hes3	13.9066	-7.81001	1.28996	-6.05444	1.40903e-09	7.06454e-09	ENSRNOG00000010893	Significant	Downregulated	8.85108	0.775216
Ltk	18.8746	-3.02085	0.501486	-6.02379	1.70383e-09	8.48558e-09	ENSRNOG00000025130	Significant	Downregulated	8.76857	1.99407
Cd40	22.9871	-6.67605	1.1142	-5.99178	2.0756e-09	1.02459e-08	ENSRNOG00000018488	Significant	Downregulated	8.68286	0.897504
Ffar4	23.7861	-7.61822	1.27293	-5.98478	2.16677e-09	1.06657e-08	ENSRNOG00000021763	Significant	Downregulated	8.66419	0.785588
Kcna7	15.3712	-4.18959	0.703604	-5.95446	2.60927e-09	1.27518e-08	ENSRNOG00000020779	Significant	Downregulated	8.58348	1.42125
Lrrc66	19.7902	-3.89742	0.655144	-5.94895	2.69865e-09	1.31721e-08	ENSRNOG00000026585	Significant	Downregulated	8.56885	1.52638
Tmc7	12.5837	-7.65311	1.28979	-5.9336	2.96359e-09	1.44473e-08	ENSRNOG00000016679	Significant	Downregulated	8.52818	0.77532
Csf3	23.4808	-7.61138	1.29219	-5.8903	3.85505e-09	1.85964e-08	ENSRNOG00000008525	Significant	Downregulated	8.41397	0.77388
Fam184b	15.9385	-4.40511	0.759013	-5.80373	6.48547e-09	3.06529e-08	ENSRNOG00000003704	Significant	Downregulated	8.18806	1.3175
Gpr68	20.2611	-5.86972	1.02241	-5.74103	9.41006e-09	4.38018e-08	ENSRNOG00000046309	Significant	Downregulated	8.02641	0.978077
Rsph6a	14.6867	-3.99436	0.695928	-5.73961	9.48933e-09	4.41577e-08	ENSRNOG00000061526	Significant	Downregulated	8.02276	1.43693
Cntfr	13.8121	-3.74468	0.65497	-5.71734	1.08207e-08	5.01395e-08	ENSRNOG00000047307	Significant	Downregulated	7.96574	1.52679
Cxcl14	13.9347	-7.73772	1.35409	-5.71435	1.10124e-08	5.09728e-08	ENSRNOG00000011984	Significant	Downregulated	7.95812	0.738506
Tnfrsf9	17.0642	-7.11211	1.24501	-5.71249	1.11333e-08	5.14864e-08	ENSRNOG00000036942	Significant	Downregulated	7.95338	0.803206
Dsc2	22.7138	-3.76697	0.66515	-5.66334	1.48459e-08	6.77952e-08	ENSRNOG00000039969	Significant	Downregulated	7.82839	1.50342
Cxcl10	12.6128	-7.63925	1.35907	-5.62095	1.89907e-08	8.56742e-08	ENSRNOG00000022256	Significant	Downregulated	7.72146	0.735799
Hal	15.0118	-4.0805	0.728332	-5.60253	2.11251e-08	9.50024e-08	ENSRNOG00000004502	Significant	Downregulated	7.6752	1.373
Dnase1l3	17.6579	6.92744	1.24175	5.57876	2.42234e-08	1.0819e-07	ENSRNOG00000009291	Significant	Upregulated	7.61577	0.805314
Gdpd2	20.9488	-3.19508	0.575321	-5.55356	2.79912e-08	1.24163e-07	ENSRNOG00000002800	Significant	Downregulated	7.55298	1.73816
Hcar2	9.28445	-7.23797	1.30331	-5.55352	2.79976e-08	1.24163e-07	ENSRNOG00000026653	Significant	Downregulated	7.55288	0.767276
Ankrd35	9.49352	-7.24192	1.31224	-5.51873	3.41452e-08	1.49982e-07	ENSRNOG00000025108	Significant	Downregulated	7.46667	0.762054
Fcho1	14.2505	-4.94848	0.903826	-5.47504	4.37407e-08	1.89737e-07	ENSRNOG00000033912	Significant	Downregulated	7.35911	1.10641
Slc44a3	16.0689	-3.57723	0.656247	-5.45104	5.00767e-08	2.16203e-07	ENSRNOG00000011723	Significant	Downregulated	7.30036	1.52382
Rprml	11.9142	-4.63514	0.855097	-5.4206	5.93995e-08	2.5456e-07	ENSRNOG00000028436	Significant	Downregulated	7.22622	1.16946
Spata20	17.6946	-3.02984	0.561813	-5.39297	6.93031e-08	2.95306e-07	ENSRNOG00000003273	Significant	Downregulated	7.15925	1.77995
Faah	15.0843	-4.40215	0.817687	-5.38366	7.29856e-08	3.10407e-07	ENSRNOG00000045949	Significant	Downregulated	7.13676	1.22296
Tnip3	9.14198	-7.21403	1.3402	-5.38281	7.33305e-08	3.11789e-07	ENSRNOG00000064111	Significant	Downregulated	7.13472	0.746159
Podxl	12.014	-5.04569	0.947663	-5.32435	1.01317e-07	4.24334e-07	ENSRNOG00000012495	Significant	Downregulated	6.99432	1.05523
Serpinb10	18.8278	-4.21242	0.792072	-5.31823	1.0478e-07	4.38137e-07	ENSRNOG00000002417	Significant	Downregulated	6.97972	1.26251
Styxl2	12.9968	6.83023	1.2965	5.2682	1.37765e-07	5.68026e-07	ENSRNOG00000003722	Significant	Upregulated	6.86086	0.771307
Ccdc88c	16.3045	-4.41113	0.839072	-5.25715	1.46308e-07	6.01509e-07	ENSRNOG00000004482	Significant	Downregulated	6.83473	1.19179
Jag2	13.0107	-5.79521	1.10752	-5.23258	1.67163e-07	6.83664e-07	ENSRNOG00000013927	Significant	Downregulated	6.77686	0.902915
Cyp2c11	21.2893	4.29668	0.824818	5.20924	1.89613e-07	7.69651e-07	ENSRNOG00000052810	Significant	Upregulated	6.72213	1.21239
Tnfrsf14	9.14941	-7.21531	1.38673	-5.2031	1.95989e-07	7.92863e-07	ENSRNOG00000013820	Significant	Downregulated	6.70777	0.721119
Ptpre	19.4808	-3.06059	0.591515	-5.17415	2.28948e-07	9.15559e-07	ENSRNOG00000015717	Significant	Downregulated	6.64026	1.69057
Eps8l2	14.0199	-3.09802	0.598828	-5.17348	2.29779e-07	9.18178e-07	ENSRNOG00000018336	Significant	Downregulated	6.63869	1.66993
Mir23b	42.9605	-3.36544	0.651119	-5.1687	2.35731e-07	9.40761e-07	ENSRNOG00000035467	Significant	Downregulated	6.62758	1.53582
Atp8b4	12.5985	-3.98213	0.77299	-5.15159	2.58293e-07	1.02558e-06	ENSRNOG00000031598	Significant	Downregulated	6.58789	1.29368
RT1-CE15	7.33239	-6.87401	1.33459	-5.15065	2.59579e-07	1.03042e-06	ENSRNOG00000065311	Significant	Downregulated	6.58573	0.749294
Cimap2	8.66591	-7.09258	1.38541	-5.11948	3.06377e-07	1.20762e-06	ENSRNOG00000030914	Significant	Downregulated	6.51374	0.721808
Flrt1	13.9982	-3.15885	0.617633	-5.11445	3.14665e-07	1.2378e-06	ENSRNOG00000022428	Significant	Downregulated	6.50215	1.61908
Kcng2	15.6671	-4.17797	0.821352	-5.0867	3.64344e-07	1.42785e-06	ENSRNOG00000053640	Significant	Downregulated	6.43849	1.21751
Jaml	11.2756	-4.40611	0.869011	-5.07025	3.97286e-07	1.55113e-06	ENSRNOG00000026702	Significant	Downregulated	6.4009	1.15073
Angptl8	10.5475	-4.86705	0.962442	-5.05698	4.25947e-07	1.65766e-06	ENSRNOG00000011490	Significant	Downregulated	6.37064	1.03902
Upk1b	12.0607	-3.35228	0.663492	-5.05248	4.36106e-07	1.69509e-06	ENSRNOG00000027380	Significant	Downregulated	6.36041	1.50718
Dab1	19.4848	3.10486	0.615044	5.04818	4.46028e-07	1.73237e-06	ENSRNOG00000007410	Significant	Upregulated	6.35064	1.6259
Slit1	14.0241	-6.80255	1.35163	-5.03285	4.83229e-07	1.8699e-06	ENSRNOG00000026065	Significant	Downregulated	6.31585	0.739848
Mir146a	8.5296	-7.11505	1.42108	-5.00679	5.5344e-07	2.12793e-06	ENSRNOG00000035466	Significant	Downregulated	6.25693	0.703691
Itprid1	20.6001	5.44828	1.08983	4.99919	5.75726e-07	2.20874e-06	ENSRNOG00000012165	Significant	Upregulated	6.23978	0.917571
Foxo6	10.9375	-4.17068	0.834912	-4.99535	5.87297e-07	2.25092e-06	ENSRNOG00000032639	Significant	Downregulated	6.23114	1.19773
Il1a	10.1573	-6.36232	1.27864	-4.97584	6.49645e-07	2.48138e-06	ENSRNOG00000004575	Significant	Downregulated	6.18732	0.78208
Htr6	6.58845	-6.74274	1.35991	-4.95822	7.11436e-07	2.70225e-06	ENSRNOG00000049761	Significant	Downregulated	6.14786	0.735342
Nsun7	12.0964	-3.52414	0.71143	-4.9536	7.28528e-07	2.76181e-06	ENSRNOG00000025494	Significant	Downregulated	6.13755	1.40562
Syt15	10.0584	-7.33653	1.48116	-4.95324	7.2989e-07	2.76564e-06	ENSRNOG00000051688	Significant	Downregulated	6.13674	0.675147
Cers3	6.36746	-6.64399	1.34483	-4.94037	7.79725e-07	2.94734e-06	ENSRNOG00000013823	Significant	Downregulated	6.10806	0.743586
Card10	13.871	-4.15531	0.842484	-4.93221	8.1304e-07	3.06588e-06	ENSRNOG00000008401	Significant	Downregulated	6.08989	1.18697
Pdia2	12.2048	-3.04248	0.617958	-4.92344	8.50363e-07	3.20199e-06	ENSRNOG00000063310	Significant	Downregulated	6.0704	1.61823
Slc1a2	12.1913	-3.15963	0.64632	-4.88865	1.01528e-06	3.7965e-06	ENSRNOG00000005479	Significant	Downregulated	5.99342	1.54722
Mos	10.2597	-4.05164	0.830765	-4.877	1.07711e-06	4.01528e-06	ENSRNOG00000008567	Significant	Downregulated	5.96774	1.20371
Nmu	15.5875	3.41227	0.699799	4.87606	1.08224e-06	4.03344e-06	ENSRNOG00000002164	Significant	Upregulated	5.96568	1.42898
Lmntd2	9.43748	-3.99616	0.823145	-4.85474	1.20544e-06	4.46511e-06	ENSRNOG00000017050	Significant	Downregulated	5.91886	1.21485
Ces1a	11.2053	-5.63195	1.17174	-4.80649	1.53606e-06	5.62838e-06	ENSRNOG00000039725	Significant	Downregulated	5.81359	0.853431
Zswim5	10.3473	-3.25966	0.682143	-4.77856	1.76554e-06	6.41225e-06	ENSRNOG00000018160	Significant	Downregulated	5.75312	1.46597
Slpi	6.47402	-6.71785	1.40962	-4.76572	1.88179e-06	6.82024e-06	ENSRNOG00000046699	Significant	Downregulated	5.72543	0.709412
Psd4	16.3558	-3.38976	0.714033	-4.74735	2.06102e-06	7.43202e-06	ENSRNOG00000006079	Significant	Downregulated	5.68592	1.4005
Dhh	12.1746	-3.14778	0.664738	-4.73537	2.18652e-06	7.86103e-06	ENSRNOG00000053675	Significant	Downregulated	5.66025	1.50435
Panx2	15.3794	-3.34074	0.707306	-4.72319	2.32174e-06	8.32998e-06	ENSRNOG00000055530	Significant	Downregulated	5.63419	1.41382
Col19a1	13.9175	3.73333	0.794752	4.69747	2.63398e-06	9.40288e-06	ENSRNOG00000012759	Significant	Upregulated	5.57939	1.25825
C9h6orf132	13.1983	-3.26106	0.696686	-4.68082	2.85728e-06	1.01537e-05	ENSRNOG00000015297	Significant	Downregulated	5.54405	1.43537
Morc1	14.1013	5.20348	1.11786	4.65484	3.24226e-06	1.14311e-05	ENSRNOG00000032101	Significant	Upregulated	5.48915	0.894564
Rasd2	10.2025	-5.41581	1.16803	-4.63671	3.5399e-06	1.2419e-05	ENSRNOG00000014761	Significant	Downregulated	5.45101	0.856145
Scml4	21.2072	-3.02293	0.654429	-4.6192	3.85231e-06	1.34728e-05	ENSRNOG00000026110	Significant	Downregulated	5.41428	1.52805
Camk1g	9.09679	-6.21768	1.35132	-4.60118	4.20094e-06	1.46235e-05	ENSRNOG00000006470	Significant	Downregulated	5.37665	0.740016
Slfn2	11.5155	-3.71511	0.811928	-4.57567	4.74698e-06	1.64257e-05	ENSRNOG00000037113	Significant	Downregulated	5.32358	1.23164
Usp18	9.42103	-3.42111	0.748287	-4.57192	4.83273e-06	1.67077e-05	ENSRNOG00000037198	Significant	Downregulated	5.31581	1.33639
Wnt10b	9.34643	-3.34795	0.736658	-4.54478	5.49922e-06	1.88744e-05	ENSRNOG00000061238	Significant	Downregulated	5.2597	1.35748
Hk3	7.76528	-5.93483	1.31982	-4.49669	6.90203e-06	2.34274e-05	ENSRNOG00000026235	Significant	Downregulated	5.16102	0.757677
Sowahd	11.174	5.64959	1.25823	4.4901	7.11894e-06	2.41114e-05	ENSRNOG00000049392	Significant	Upregulated	5.14758	0.794766
Rxfp3	12.6802	5.68039	1.27196	4.46584	7.97553e-06	2.68377e-05	ENSRNOG00000023126	Significant	Upregulated	5.09824	0.786186
Rtn4rl2	8.92381	-5.99176	1.344	-4.45817	8.26621e-06	2.77572e-05	ENSRNOG00000021513	Significant	Downregulated	5.08269	0.74405
Rnf43	9.01014	-4.43157	0.998857	-4.43664	9.13733e-06	3.05383e-05	ENSRNOG00000007606	Significant	Downregulated	5.03918	1.00114
Adcyap1r1	10.1383	-4.79676	1.08317	-4.42843	9.49215e-06	3.16499e-05	ENSRNOG00000012098	Significant	Downregulated	5.02264	0.923213
Fgf16	12.9301	3.45924	0.783124	4.41723	9.99737e-06	3.32496e-05	ENSRNOG00000061530	Significant	Upregulated	5.00011	1.27694
Wwc1	13.4714	3.30962	0.755701	4.37953	1.18933e-05	3.92553e-05	ENSRNOG00000008065	Significant	Upregulated	4.9247	1.32327
Oasl	5.25953	-6.28363	1.4379	-4.37	1.24246e-05	4.09484e-05	ENSRNOG00000001187	Significant	Downregulated	4.90572	0.695458
Gabrp	12.4011	3.73578	0.861432	4.33671	1.44628e-05	4.72288e-05	ENSRNOG00000032417	Significant	Upregulated	4.83975	1.16086
Mir101a	9.55306	-6.29714	1.45414	-4.33049	1.4878e-05	4.84934e-05	ENSRNOG00000035599	Significant	Downregulated	4.82746	0.687691
Mir221	15.0145	-3.05947	0.706585	-4.32994	1.49149e-05	4.86037e-05	ENSRNOG00000035631	Significant	Downregulated	4.82638	1.41526
Htr5b	7.77651	-4.47038	1.03823	-4.30579	1.66394e-05	5.39542e-05	ENSRNOG00000002549	Significant	Downregulated	4.77886	0.96318
Sstr2	6.40949	-6.63554	1.54298	-4.30047	1.70433e-05	5.51951e-05	ENSRNOG00000002793	Significant	Downregulated	4.76845	0.648097
Sostdc1	6.6956	5.81503	1.3536	4.29599	1.73916e-05	5.62214e-05	ENSRNOG00000005770	Significant	Upregulated	4.75966	0.738773
Col22a1	8.83137	-4.55825	1.06314	-4.28752	1.80683e-05	5.82138e-05	ENSRNOG00000024824	Significant	Downregulated	4.74308	0.940606
Dmkn	4.68472	-6.21498	1.45691	-4.26588	1.99117e-05	6.39558e-05	ENSRNOG00000055934	Significant	Downregulated	4.70089	0.686386
Grin2c	4.54622	-6.17165	1.44741	-4.26392	2.00874e-05	6.44805e-05	ENSRNOG00000003280	Significant	Downregulated	4.69708	0.690888
Lrp2bp	6.89729	-5.75812	1.35235	-4.25785	2.06401e-05	6.61329e-05	ENSRNOG00000011178	Significant	Downregulated	4.68529	0.739451
Rgs14	10.2756	-3.26678	0.771039	-4.23686	2.26672e-05	7.21702e-05	ENSRNOG00000015616	Significant	Downregulated	4.6446	1.29695
Cdh18	13.0665	3.69631	0.873275	4.2327	2.30904e-05	7.34382e-05	ENSRNOG00000010535	Significant	Upregulated	4.63657	1.14511
Tac3	10.9181	-3.10982	0.736502	-4.22242	2.41696e-05	7.67044e-05	ENSRNOG00000004229	Significant	Downregulated	4.61673	1.35777
Rbp2	4.47198	-6.15074	1.46581	-4.19613	2.7151e-05	8.57493e-05	ENSRNOG00000013932	Significant	Downregulated	4.56621	0.682217
Ttc34	5.2252	-6.3736	1.53883	-4.14184	3.44526e-05	0.000107338	ENSRNOG00000024526	Significant	Downregulated	4.46278	0.649843
Unc5a	4.0391	-5.84451	1.41242	-4.13795	3.50428e-05	0.000109069	ENSRNOG00000059840	Significant	Downregulated	4.4554	0.708005
Irf8	7.14951	-4.25348	1.02872	-4.13473	3.55368e-05	0.000110475	ENSRNOG00000017869	Significant	Downregulated	4.44932	0.972082
Matn1	4.47057	-6.18333	1.49812	-4.12738	3.66913e-05	0.000113883	ENSRNOG00000010932	Significant	Downregulated	4.43544	0.667502
Efcc1	6.66645	-5.67588	1.37602	-4.12486	3.70956e-05	0.000115001	ENSRNOG00000009787	Significant	Downregulated	4.43068	0.726736
Ccl4	4.07068	-6.05073	1.48163	-4.08382	4.43006e-05	0.000135779	ENSRNOG00000011406	Significant	Downregulated	4.35359	0.674931
C8h11orf87	12.1994	3.94644	0.96693	4.08141	4.47633e-05	0.000137117	ENSRNOG00000025463	Significant	Upregulated	4.34908	1.0342
Tbc1d30	4.15103	-6.03899	1.48393	-4.0696	4.70939e-05	0.000143792	ENSRNOG00000023951	Significant	Downregulated	4.32704	0.673887
Il2rg	7.69448	-3.81991	0.938755	-4.06913	4.71893e-05	0.000144013	ENSRNOG00000003954	Significant	Downregulated	4.32616	1.06524
Ppp2r2b	11.7228	3.33296	0.823915	4.04527	5.22623e-05	0.000158753	ENSRNOG00000018851	Significant	Upregulated	4.28181	1.21372
Tuba8	4.77383	-6.24549	1.55055	-4.02791	5.62743e-05	0.000170279	ENSRNOG00000048169	Significant	Downregulated	4.24969	0.644931
Mpp3	7.17499	-4.75312	1.18008	-4.02778	5.63059e-05	0.000170331	ENSRNOG00000033653	Significant	Downregulated	4.24945	0.847397
Map3k21	3.74791	-5.89048	1.47782	-3.98593	6.72163e-05	0.000201366	ENSRNOG00000019931	Significant	Downregulated	4.17253	0.676673
Mir351	11.7244	-3.46392	0.869736	-3.98273	6.8128e-05	0.000203786	ENSRNOG00000069684	Significant	Downregulated	4.16667	1.14977
Olah	4.1866	-6.09112	1.52968	-3.98196	6.83488e-05	0.000204399	ENSRNOG00000016403	Significant	Downregulated	4.16527	0.653733
Spetex2el1	7.5581	-4.8336	1.21854	-3.9667	7.28743e-05	0.000217154	ENSRNOG00000047581	Significant	Downregulated	4.13743	0.820651
Ccl5	4.81186	-6.29598	1.60151	-3.93129	8.44929e-05	0.000249451	ENSRNOG00000010906	Significant	Downregulated	4.07318	0.624412
B3gnt3	3.67402	-5.89876	1.50104	-3.92978	8.5023e-05	0.000250921	ENSRNOG00000018764	Significant	Downregulated	4.07046	0.666205
Lrmda	6.93681	-3.4507	0.879429	-3.9238	8.71643e-05	0.000256709	ENSRNOG00000069198	Significant	Downregulated	4.05966	1.1371
Il12b	6.61215	-3.44454	0.884944	-3.89238	9.92642e-05	0.000290542	ENSRNOG00000004380	Significant	Downregulated	4.00321	1.13002
Qprt	7.11692	-3.45565	0.889216	-3.88617	0.000101838	0.000297629	ENSRNOG00000016980	Significant	Downregulated	3.99209	1.12459
Fat2	6.86412	-4.07529	1.05316	-3.86959	0.000109017	0.000316781	ENSRNOG00000012575	Significant	Downregulated	3.9625	0.949526
Cd69	3.54767	-5.84865	1.51529	-3.85975	0.000113502	0.000329141	ENSRNOG00000056783	Significant	Downregulated	3.945	0.659939
Slc2a5	6.35258	-4.68039	1.21272	-3.85941	0.000113662	0.000329484	ENSRNOG00000017693	Significant	Downregulated	3.94438	0.82459
Grk1	4.16154	-6.07893	1.57845	-3.85119	0.000117544	0.000339918	ENSRNOG00000018430	Significant	Downregulated	3.9298	0.633532
Diras3	7.46825	-3.32008	0.864711	-3.83953	0.000123271	0.000355104	ENSRNOG00000068695	Significant	Downregulated	3.90914	1.15646
Khk	3.60427	-5.86864	1.53387	-3.82604	0.000130221	0.000373477	ENSRNOG00000008047	Significant	Downregulated	3.88532	0.651946
Rasgef1a	6.0616	-3.6276	0.949565	-3.82028	0.000133302	0.000381475	ENSRNOG00000031671	Significant	Downregulated	3.87516	1.05311
Rsad2	3.52879	-5.80349	1.51956	-3.8192	0.000133886	0.000383075	ENSRNOG00000007539	Significant	Downregulated	3.87327	0.658087
Ptprr	11.5478	3.50226	0.917642	3.81659	0.000135309	0.000386936	ENSRNOG00000004483	Significant	Upregulated	3.86867	1.08975
Mcoln3	6.33878	-4.70178	1.24445	-3.77821	0.00015796	0.000448031	ENSRNOG00000015024	Significant	Downregulated	3.80145	0.803569
Klhl31	8.52211	-3.1042	0.823674	-3.76872	0.000164089	0.000463538	ENSRNOG00000006224	Significant	Downregulated	3.78492	1.21407
Cmah	6.07171	-5.6324	1.49602	-3.76491	0.000166606	0.00047017	ENSRNOG00000003094	Significant	Downregulated	3.77831	0.668439
Utf1	3.29795	-5.74427	1.53127	-3.7513	0.000175919	0.000494404	ENSRNOG00000050207	Significant	Downregulated	3.75469	0.653051
Prss46	3.49579	-5.82413	1.55692	-3.74081	0.000183425	0.000514577	ENSRNOG00000020981	Significant	Downregulated	3.73654	0.642295
Csf2	3.51813	-5.83259	1.58013	-3.6912	0.000223198	0.000617419	ENSRNOG00000026805	Significant	Downregulated	3.65131	0.632858
Il1rn	6.79323	-3.7903	1.03372	-3.66665	0.000245749	0.000676576	ENSRNOG00000005871	Significant	Downregulated	3.60951	0.967378
Abcc9	9.58097	3.2195	0.883984	3.64203	0.000270497	0.000741065	ENSRNOG00000036960	Significant	Upregulated	3.56784	1.13124
Dtx1	3.54048	-5.84121	1.61026	-3.62751	0.000286173	0.000781415	ENSRNOG00000050848	Significant	Downregulated	3.54337	0.621019
Kcnj16	5.04337	5.33302	1.47315	3.62015	0.000294429	0.000802699	ENSRNOG00000004713	Significant	Upregulated	3.53102	0.678818
Fbxo41	8.06241	-3.10746	0.861713	-3.60614	0.000310783	0.000843761	ENSRNOG00000033202	Significant	Downregulated	3.50754	1.16048
Adgrv1	4.31943	-4.98336	1.38562	-3.59648	0.000322558	0.000874063	ENSRNOG00000016306	Significant	Downregulated	3.49139	0.721697
RT1-Bb	3.2565	-5.7219	1.59131	-3.59573	0.000323488	0.000876433	ENSRNOG00000032708	Significant	Downregulated	3.49014	0.628414
Plppr1	9.23373	3.03564	0.847726	3.58092	0.000342392	0.000922862	ENSRNOG00000007575	Significant	Upregulated	3.46548	1.17963
Ccl3	3.26667	-5.73262	1.60262	-3.57703	0.000347526	0.000935574	ENSRNOG00000011205	Significant	Downregulated	3.45901	0.623977
Snora50c	8.1577	3.61127	1.01108	3.57171	0.000354661	0.000954125	ENSRNOG00000052344	Significant	Upregulated	3.45019	0.989046
Elf3	4.41306	-5.99557	1.67889	-3.57115	0.000355418	0.000955669	ENSRNOG00000006330	Significant	Downregulated	3.44926	0.595631
Rufy4	8.93596	-3.30604	0.933822	-3.54033	0.000399626	0.00106612	ENSRNOG00000032991	Significant	Downregulated	3.39835	1.07087
Ckmt1	2.97699	-5.59431	1.58315	-3.53365	0.000409858	0.00109212	ENSRNOG00000014573	Significant	Downregulated	3.38737	0.631651
Adgre1	3.01248	-5.61682	1.59285	-3.52628	0.000421443	0.00112051	ENSRNOG00000046254	Significant	Downregulated	3.37526	0.627807
Sult2b1	3.08372	-5.65334	1.60399	-3.52454	0.000424215	0.0011275	ENSRNOG00000021046	Significant	Downregulated	3.37241	0.623444
Tcp11	7.37562	-3.42996	0.974737	-3.51886	0.000433408	0.00115076	ENSRNOG00000000499	Significant	Downregulated	3.3631	1.02592
Tmt1b	4.14469	-5.07242	1.44225	-3.51701	0.000436436	0.00115841	ENSRNOG00000007927	Significant	Downregulated	3.36008	0.69336
Pld6	6.52422	-3.31418	0.943959	-3.51093	0.000446534	0.00118261	ENSRNOG00000021657	Significant	Downregulated	3.35015	1.05937
Mir27b	68.4507	-3.08336	0.879985	-3.50388	0.000458529	0.00121069	ENSRNOG00000035576	Significant	Downregulated	3.33863	1.13638
Rcsd1	7.68765	-3.00618	0.859052	-3.49942	0.000466274	0.00122927	ENSRNOG00000003283	Significant	Downregulated	3.33136	1.16407
Psd2	4.67922	-4.85437	1.38778	-3.49795	0.000468852	0.00123524	ENSRNOG00000019177	Significant	Downregulated	3.32896	0.720578
Hfm1	5.69259	-3.84572	1.10113	-3.49252	0.000478489	0.0012583	ENSRNOG00000023299	Significant	Downregulated	3.32013	0.908156
Atg9b	4.03639	-5.00052	1.4381	-3.47717	0.000506732	0.00132789	ENSRNOG00000023449	Significant	Downregulated	3.29522	0.695362
Pla1a	6.37846	-3.35911	0.966677	-3.4749	0.000511039	0.00133003	ENSRNOG00000057153	Significant	Downregulated	3.29155	1.03447
S1pr5	4.02635	-4.94844	1.4241	-3.47477	0.000511283	0.00133003	ENSRNOG00000020901	Significant	Downregulated	3.29134	0.702196
Nrtn	4.10103	-4.95159	1.43248	-3.45666	0.000546905	0.00139969	ENSRNOG00000048651	Significant	Downregulated	3.26209	0.698092
Fam25a	4.82783	-4.36018	1.27008	-3.433	0.000596951	0.00151736	ENSRNOG00000055025	Significant	Downregulated	3.22406	0.787351
Dlgap2	5.38065	-4.55204	1.33895	-3.39972	0.000674547	0.00170245	ENSRNOG00000012573	Significant	Downregulated	3.17099	0.746856
Hpdl	7.97204	3.07634	0.906978	3.39186	0.000694201	0.00175036	ENSRNOG00000018143	Significant	Upregulated	3.15851	1.10256
Kcnb2	5.70414	4.52432	1.33418	3.3911	0.000696139	0.00175468	ENSRNOG00000028991	Significant	Upregulated	3.1573	0.749526
Tcf15	2.69302	-5.45312	1.6108	-3.38535	0.000710872	0.00178894	ENSRNOG00000000012	Significant	Downregulated	3.14821	0.62081
Tll2	5.73384	-3.25544	0.963844	-3.37756	0.00073132	0.00183686	ENSRNOG00000013519	Significant	Downregulated	3.13589	1.03751
Fhl5	5.08906	4.62325	1.3712	3.37169	0.000747098	0.00187468	ENSRNOG00000007680	Significant	Upregulated	3.12662	0.72929
Bik	3.01695	-5.61823	1.67338	-3.35741	0.000786758	0.00196539	ENSRNOG00000010359	Significant	Downregulated	3.10416	0.597593
Tnf	2.74638	-5.48591	1.63833	-3.34847	0.000812582	0.00202377	ENSRNOG00000070745	Significant	Downregulated	3.09013	0.610377
Spmip6	6.1419	-3.13411	0.938315	-3.34014	0.00083735	0.00208215	ENSRNOG00000013320	Significant	Downregulated	3.07709	1.06574
Gucy2c	5.53099	-3.81127	1.15417	-3.30216	0.000959424	0.00236431	ENSRNOG00000009031	Significant	Downregulated	3.01799	0.866421
Batf	3.67381	-4.89933	1.48469	-3.29989	0.000967214	0.00238275	ENSRNOG00000008588	Significant	Downregulated	3.01448	0.67354
Naip6	6.64351	-3.02026	0.915299	-3.29976	0.00096769	0.00238355	ENSRNOG00000033693	Significant	Downregulated	3.01426	1.09254
Adora2a	4.61088	-4.21405	1.27965	-3.29312	0.00099081	0.00243514	ENSRNOG00000001302	Significant	Downregulated	3.00401	0.781463
Wdr95	7.30321	3.34879	1.01713	3.2924	0.000993358	0.00244102	ENSRNOG00000000904	Significant	Upregulated	3.00289	0.98316
Kcnmb1	3.83851	4.87946	1.48283	3.29065	0.000999559	0.0024551	ENSRNOG00000005465	Significant	Upregulated	3.00019	0.674388
Snord6	6.92708	4.0124	1.22866	3.26568	0.00109201	0.00266672	ENSRNOG00000057682	Significant	Upregulated	2.96177	0.813897
Adrb1	2.91916	-5.44867	1.66905	-3.26454	0.00109642	0.00267539	ENSRNOG00000017002	Significant	Downregulated	2.96002	0.599144
Mir542	7.67416	-3.04968	0.937821	-3.25188	0.00114646	0.00278665	ENSRNOG00000070890	Significant	Downregulated	2.94064	1.0663
Cdh6	3.14005	4.79227	1.47479	3.24946	0.00115623	0.0028091	ENSRNOG00000013535	Significant	Upregulated	2.93695	0.678063
Mir210	3.62585	-5.76108	1.77417	-3.2472	0.00116546	0.00282933	ENSRNOG00000035616	Significant	Downregulated	2.9335	0.563645
Afm	5.78442	3.9635	1.22153	3.24471	0.00117569	0.00285284	ENSRNOG00000002878	Significant	Upregulated	2.92971	0.818647
Atf7ip2	2.74119	-5.02815	1.55409	-3.23542	0.00121462	0.00294229	ENSRNOG00000025522	Significant	Downregulated	2.91556	0.643463
Atp13a4	3.22478	-5.41865	1.67607	-3.23295	0.00122519	0.00296514	ENSRNOG00000001714	Significant	Downregulated	2.9118	0.596634
Ankrd1	7.82602	3.88219	1.21651	3.19124	0.00141664	0.00340063	ENSRNOG00000018598	Significant	Upregulated	2.84874	0.822021
Klhl33	2.85131	-5.2946	1.66101	-3.18758	0.00143467	0.00344126	ENSRNOG00000025868	Significant	Downregulated	2.84325	0.602044
Foxa1	6.58062	-3.20606	1.01129	-3.17028	0.00152294	0.0036424	ENSRNOG00000009284	Significant	Downregulated	2.81732	0.988838
Hook1	3.69874	-4.69038	1.49085	-3.14611	0.00165457	0.00393142	ENSRNOG00000026226	Significant	Downregulated	2.78132	0.670758
Mal2	3.65996	4.67556	1.49784	3.12153	0.00179916	0.00425048	ENSRNOG00000008615	Significant	Upregulated	2.74493	0.667627
Neurod6	3.44104	4.70332	1.51603	3.10238	0.00191969	0.00451144	ENSRNOG00000026055	Significant	Upregulated	2.71677	0.659615
Cyp19a1	4.15732	-4.07907	1.31695	-3.09736	0.00195252	0.00458241	ENSRNOG00000000196	Significant	Downregulated	2.7094	0.75933
Apol9a	5.79315	-3.03028	0.978402	-3.09717	0.00195377	0.00458464	ENSRNOG00000023410	Significant	Downregulated	2.70913	1.02207
Grpr	3.17969	4.68804	1.51514	3.09413	0.00197391	0.00462706	ENSRNOG00000004124	Significant	Upregulated	2.70467	0.660005
Rgs6	3.64724	4.85323	1.57472	3.08196	0.00205642	0.00480465	ENSRNOG00000008082	Significant	Upregulated	2.68689	0.635032
Adap2	2.30431	-5.0286	1.6363	-3.07315	0.00211809	0.00493916	ENSRNOG00000037148	Significant	Downregulated	2.67406	0.611135
Il7r	2.66042	-5.37441	1.75995	-3.05373	0.00226017	0.00525095	ENSRNOG00000065741	Significant	Downregulated	2.64586	0.568198
Hmcn2	3.04769	-4.56609	1.50298	-3.03802	0.00238141	0.00551217	ENSRNOG00000064166	Significant	Downregulated	2.62317	0.665343
Entrep2	2.0617	-4.91803	1.62111	-3.03374	0.0024154	0.0055859	ENSRNOG00000023496	Significant	Downregulated	2.61701	0.616861
Gjb2	2.45537	4.57833	1.52013	3.0118	0.00259706	0.00595677	ENSRNOG00000008855	Significant	Upregulated	2.58552	0.657837
Dbndd1	5.28584	-3.43808	1.14903	-2.99217	0.00277	0.00633211	ENSRNOG00000026974	Significant	Downregulated	2.55752	0.870303
Ankrd66	3.01268	-4.49309	1.50662	-2.98223	0.0028616	0.00652819	ENSRNOG00000068669	Significant	Downregulated	2.54339	0.663736
B3gnt6	5.37813	-3.00502	1.0095	-2.97675	0.00291324	0.00663151	ENSRNOG00000014471	Significant	Downregulated	2.53562	0.990593
Creg2	4.48567	-3.5511	1.19337	-2.97568	0.00292339	0.00665073	ENSRNOG00000013991	Significant	Downregulated	2.53411	0.83796
Gdf7	2.38701	4.58479	1.54232	2.97266	0.00295231	0.00671068	ENSRNOG00000006046	Significant	Upregulated	2.52984	0.648374
Slc26a7	6.31497	3.16669	1.06713	2.96748	0.00300248	0.00681681	ENSRNOG00000006096	Significant	Upregulated	2.52252	0.937092
Mesp2	2.93749	-4.5091	1.52362	-2.95946	0.00308178	0.00698673	ENSRNOG00000014925	Significant	Downregulated	2.5112	0.65633
Aadacl2fm2	2.58316	4.68098	1.59135	2.94151	0.00326619	0.00737387	ENSRNOG00000048440	Significant	Upregulated	2.48596	0.628396
Crhr2	2.47309	-5.32966	1.81747	-2.93245	0.00336296	0.00757271	ENSRNOG00000011145	Significant	Downregulated	2.47328	0.550214
Vstm2b	2.95957	4.36588	1.49186	2.92647	0.00342834	0.00770874	ENSRNOG00000017456	Significant	Upregulated	2.46492	0.670304
Actrt3	2.84995	-4.45131	1.52255	-2.92359	0.00346016	0.0077737	ENSRNOG00000027908	Significant	Downregulated	2.4609	0.656794
Magea14	2.82764	4.89403	1.69186	2.89269	0.00381952	0.00852361	ENSRNOG00000032629	Significant	Upregulated	2.41799	0.591066
Alkal1	2.68156	4.478	1.55011	2.88882	0.00386691	0.00862323	ENSRNOG00000048703	Significant	Upregulated	2.41264	0.645114
Hephl1	2.18937	-5.14788	1.78402	-2.88555	0.00390736	0.00870723	ENSRNOG00000056092	Significant	Downregulated	2.40812	0.560531
Fbxo47	3.17237	4.85237	1.68337	2.88253	0.00394498	0.00878357	ENSRNOG00000036882	Significant	Upregulated	2.40395	0.594045
Gpr37l1	2.73542	-5.06327	1.76566	-2.86763	0.00413559	0.00917276	ENSRNOG00000006237	Significant	Downregulated	2.38346	0.566359
Cldn22	2.76741	4.48128	1.57085	2.85278	0.00433392	0.00958282	ENSRNOG00000030889	Significant	Upregulated	2.36312	0.636598
Odad2	2.80803	4.36944	1.53308	2.85011	0.00437039	0.00965801	ENSRNOG00000018905	Significant	Upregulated	2.35948	0.652283
Plet1	2.01983	-5.03544	1.77151	-2.84246	0.00447662	0.00987211	ENSRNOG00000024346	Significant	Downregulated	2.34905	0.564492
Slc1a6	2.01983	-5.03544	1.77151	-2.84246	0.00447662	0.00987211	ENSRNOG00000007509	Significant	Downregulated	2.34905	0.564492
