# Supplementary material for: Dental Follicle Mesenchymal Stem Cell-Derived Exosomes Mitigate Temporomandibular Joint Osteoarthritis in an In Vitro Model via the miR-146a-5p/Traf6/NF-κB Axis
Source: Research Square preprint supplement (doi:10.21203/rs.3.rs-8341412/v1), 2025-12-19
Supplement: Supplementary file 9 [file d48d92c520ccab7111065585.docx]

Supplementary Table 2 Detailed Information about the Generated Data in mRNA Sequencing

| **Sample Name** | **Raw Bases (Gbp)** | **Clean Base (Gbp)** | **Q20 Ratio (%)** | **GC Content (%)** | **Reads** |
| --- | --- | --- | --- | --- | --- |
| Control-1 | 7.55 | 7.38 | 98.59 | 51.31 | 49749974 |
| Control-2 | 6.76 | 6.62 | 98.57 | 51.26 | 44633296 |
| Control-3 | 7.39 | 7.23 | 98.53 | 51.92 | 48715140 |
| Model-1 | 6.82 | 6.69 | 98.57 | 51.41 | 44962030 |
| Model-2 | 6.64 | 6.51 | 98.60 | 51.26 | 43775480 |
| Model-3 | 6.36 | 6.23 | 98.62 | 50.96 | 41879506 |
| Treatment-1 | 6.92 | 6.78 | 98.69 | 51.64 | 45601934 |
| Treatment-2 | 6.23 | 6.06 | 98.58 | 51.51 | 40945532 |
| Treatment-3 | 8.13 | 7.95 | 98.53 | 51.85 | 53531038 |

Note: Q20 indicates the percentage of bases with a Phred quality score > 20, signifying the reliability of base identification in the sequencing data.
