# Supplementary material for: Dental Follicle Mesenchymal Stem Cell-Derived Exosomes Mitigate Temporomandibular Joint Osteoarthritis in an In Vitro Model via the miR-146a-5p/Traf6/NF-κB Axis
Source: Research Square preprint supplement (doi:10.21203/rs.3.rs-8341412/v1), 2025-12-19
Supplement: Supplementary file 10 [file f8393cab3d12c1d3ff4d204f.xlsx]

## Sheet: TargetScan8.0
Ortholog of target gene	Representative transcript	Gene name	3P-seq tags + 5	Conserved sites total	Conserved 8mer sites	Conserved 7mer-m8 sites	Conserved 7mer-A1 sites	Poorly conserved sites total	Poorly conserved 8mer sites	Poorly conserved 7mer-m8 sites	Poorly conserved 7mer-A1 sites	6mer sites	Representative miRNA	Cumulative weighted context++ score	Total context++ score	Aggregate PCT	Previous TargetScan publication(s)
ZRSR1	ENST00000391338.1	zinc finger (CCCH type), RNA-binding motif and serine/arginine rich 1	17	1	1	0	0	0	0	0	0	0	rno-miR-146a-5p	-0.53	-1.12	< 0.1	NULL
IRAK1	ENST00000369980.3	interleukin-1 receptor-associated kinase 1	54	2	2	0	0	0	0	0	0	0	rno-miR-146a-5p	-0.78	-0.78	< 0.1	2005, 2007, 2009, 2011
CDKN2AIP	ENST00000302350.4	CDKN2A interacting protein	2313	2	1	1	0	0	0	0	0	0	rno-miR-146a-5p	-0.36	-0.65	< 0.1	NULL
TRAF6	ENST00000526995.1	TNF receptor-associated factor 6, E3 ubiquitin protein ligase	91	3	3	0	0	1	1	0	0	2	rno-miR-146a-5p	-0.28	-0.64	< 0.1	2003, 2005, 2007, 2009, 2011
IGSF1	ENST00000370900.1	immunoglobulin superfamily, member 1	416	1	1	0	0	0	0	0	0	0	rno-miR-146a-5p	-0.57	-0.57	< 0.1	2009, 2011
REL	ENST00000295025.8	v-rel avian reticuloendotheliosis viral oncogene homolog	116	1	1	0	0	2	0	1	1	0	rno-miR-146b-5p	-0.2	-0.55	0.13	NULL
TDRKH	ENST00000368825.3	tudor and KH domain containing	325	1	1	0	0	0	0	0	0	0	rno-miR-146a-5p	-0.52	-0.53	< 0.1	2009, 2011
SLC10A3	ENST00000369649.4	solute carrier family 10, member 3	433	1	1	0	0	0	0	0	0	0	rno-miR-146a-5p	-0.52	-0.52	< 0.1	2009, 2011
HNRNPD	ENST00000313899.7	heterogeneous nuclear ribonucleoprotein D (AU-rich element RNA binding protein 1, 37kDa)	1763	1	1	0	0	0	0	0	0	0	rno-miR-146a-5p	-0.5	-0.51	< 0.1	2005, 2007, 2009, 2011
FBXW2	ENST00000608872.1	F-box and WD repeat domain containing 2	227	1	1	0	0	0	0	0	0	1	rno-miR-146a-5p	-0.05	-0.51	< 0.1	2009, 2011
NOVA1	ENST00000465357.2	neuro-oncological ventral antigen 1	5	2	1	1	0	0	0	0	0	2	rno-miR-146b-5p	-0.5	-0.5	< 0.1	2005, 2007, 2009, 2011

## Sheet: miRWalk
mirnaid	refseqid	genesymbol	duplex	start	end	bindingp	energy	seed	accessibility	au	phylopstem	phylopflank	me	number_of_pairings	binding_region_length	longest_consecutive_pairings	position
rno-miR-146a-5p	NM_001105769	Tbc1d24	TGAGAACTGAATTCCATGGGTT#GCCCACAACATACTCAGTTCTTT#.(((((((((......(((((.#)))))........))))))))).	3454	3477	1	-16.7	1	0.460772	0.721	1.65866	1.45189	-13.0794	14	23	9	3UTR
rno-miR-146a-5p	NM_001130559	Nipal2	TGAGAACTGAATTCCATGGGTT#GCTGACATGTGTGCGCATTCGATTCAGTTCTCC#.((((((((((((..(((.((.#.)).)))..)))))))))))).	1743	1776	1	-21.7	1	0.307066	0.485	0.0267945	0.241966	-5.38561	17	22	12	3UTR
rno-miR-146a-5p	NM_013119	Scn3a	TGAGAACTGAATTCCATGGGTT#GGCCTATGGATTTCAA#.......((((.((((((((((#)))))))))).)))).	4044	4060	1	-18.4	0	0.263763	0.515	1.87122	2.11904	-20.457	14	16	10	CDS
rno-miR-146a-5p	XM_008761916	Scn3a	TGAGAACTGAATTCCATGGGTT#GGCCTATGGATTTCAA#.......((((.((((((((((#)))))))))).)))).	4036	4052	1	-18.4	0	0.263763	0.515	0	0	-20.457	14	16	10	CDS
rno-miR-146a-5p	XM_017591972	Scn3a	TGAGAACTGAATTCCATGGGTT#GGCCTATGGATTTCAA#.......((((.((((((((((#)))))))))).)))).	4036	4052	1	-18.4	0	0.263763	0.515	0	0	-20.457	14	16	10	CDS
rno-miR-146a-5p	NM_017198	Pak1	TGAGAACTGAATTCCATGGGTT#ACCCCTCACAATCAGTTCTTAA#((((((((((.......((((.#)))).......)))))))))).	2332	2354	1	-17.5	1	0.25469	0.632	0.317921	0.181935	-13.2236	14	22	10	3UTR
rno-miR-146a-5p	XM_039098888	Cdc40	TGAGAACTGAATTCCATGGGTT#GCCCATTGAATCAAGTTCTTC#.(((((((..((((.((((((.#)))))).))))..))))))).	2186	2207	1	-20.7	1	0.243281	0.5	0	0	-6.82767	17	21	7	3UTR
rno-miR-146a-5p	NM_172331	Chmp3	TGAGAACTGAATTCCATGGGTT#GGAGTTCAGTTCATCAT#(((((((((((((((.......#)))))))))))).))).	6	23	1	-21.2	1	0.23472	0.558	0	0	-4.17062	15	17	12	5UTR
rno-miR-146a-5p	NM_017031	Pde4b	TGAGAACTGAATTCCATGGGTT#ATCCATGATGTTGATCATCCTGGAGTCTCCAATCAGTTTCTCAT#((((((((((((((((.((((.#.))))))))))......)))))).)))).	1783	1827	1	-19.9	1	0.195567	0.618	2.17013	2.1005	-3.93757	20	29	10	CDS
rno-miR-146a-5p	NM_053765	Gne	TGAGAACTGAATTCCATGGGTT#GACCCAAGTTCAGTTCCCAG#((.((((((((((...((((((#)))))))))))))))).)).	2650	2670	1	-20.5	0	0.177502	0.485	-0.40101	-0.192206	-7.32045	18	20	16	3UTR
rno-miR-146a-5p	NM_001109294	Tmem266	TGAGAACTGAATTCCATGGGTT#GACCCAGGAGCCCCTGGGATGCCATCAGTCTCAT#((((.(((((((((((.(((((#.))))).))))))....))))))))).	722	756	1	-23.1	0	0.165442	0.456	2.33814	1.94932	-8.05661	20	27	9	CDS
rno-miR-146a-5p	XM_002730289	Tex13a	TGAGAACTGAATTCCATGGGTT#AACCAATGGAAAATCAGTTTTTG#.(((((((((.((((((.((((#)))).))))))..))))))))).	1314	1337	1	-19.9	1	0.15748	0.659	0	0	-6.6181	19	23	9	3UTR
rno-miR-146a-5p	NM_001013079	Osbpl2	TGAGAACTGAATTCCATGGGTT#ACCACAAGAGAATGGAATTCAGA#......(((((((((((.....#.))))))))))).	307	330	1	-16	0	0.147903	0.471	1.01266	1.14053	-15.5666	11	13	11	CDS
rno-miR-146a-5p	XM_017593049	LOC689800	TGAGAACTGAATTCCATGGGTT#CCTATGGAGTTGCCATCTCTTCAGCTCTCT#.((((.((((((((((((((..#))))))))))..........)))).)))).	1374	1404	1	-21.4	0	0.138128	0.544	0	0	-5.69428	18	30	10	3UTR
rno-miR-146a-5p	XM_017593051	LOC689800	TGAGAACTGAATTCCATGGGTT#CCTATGGAGTTGCCATCTCTTCAGCTCTCT#.((((.((((((((((((((..#))))))))))..........)))).)))).	1284	1314	1	-21.4	0	0.138128	0.544	0	0	-5.69428	18	30	10	3UTR
rno-miR-146a-5p	XM_017593831	Epb41	TGAGAACTGAATTCCATGGGTT#AACTCATGGAAAAATTAGG#......((((.(((((((((((#)))))))))))...)))).	3701	3720	1	-16.3	0	0.122839	0.529	0	0	-18.3913	15	19	11	3UTR
rno-miR-146a-5p	XM_017593836	Epb41	TGAGAACTGAATTCCATGGGTT#AACTCATGGAAAAATTAGG#......((((.(((((((((((#)))))))))))...)))).	3290	3309	1	-16.3	0	0.122839	0.529	0	0	-18.3913	15	19	11	3UTR
rno-miR-146a-5p	XM_017593837	Epb41	TGAGAACTGAATTCCATGGGTT#AACTCATGGAAAAATTAGG#......((((.(((((((((((#)))))))))))...)))).	3248	3267	1	-16.3	0	0.122839	0.529	0	0	-18.3913	15	19	11	3UTR
rno-miR-146a-5p	XM_017593842	Epb41	TGAGAACTGAATTCCATGGGTT#AACTCATGGAAAAATTAGG#......((((.(((((((((((#)))))))))))...)))).	3128	3147	1	-16.3	0	0.122839	0.529	0	0	-18.3913	15	19	11	3UTR
rno-miR-146a-5p	XM_039111260	Epb41	TGAGAACTGAATTCCATGGGTT#AACTCATGGAAAAATTAGG#......((((.(((((((((((#)))))))))))...)))).	3125	3144	1	-16.3	0	0.122839	0.529	0	0	-18.3913	15	19	11	3UTR
rno-miR-146a-5p	XM_017593562	RGD1564053	TGAGAACTGAATTCCATGGGTT#AACCCACCCATAGTTCTCAT#(((((((((.......((((((#))))))....))))))))).	111	131	1	-16.7	1	0.117047	0.529	0	0	-14.4661	15	20	9	5UTR
rno-miR-146a-5p	NM_001305277	LOC100911664	TGAGAACTGAATTCCATGGGTT#ACCCTGTTTTGGTGGTTTTTAGTTTTG#..(((((((((..((((((((.#)))).......))))..))))))))).	1258	1285	1	-17	1	0.11665	0.721	2.50171	2.26359	-9.59293	17	27	9	5UTR
rno-miR-146a-5p	XM_017591581	Acoxl	TGAGAACTGAATTCCATGGGTT#GCCCAGTTTCGTTCTCAT#(((((((.(((.....(((((.#)))))..)))))))))).	2851	2869	1	-17.1	1	0.114019	0.5	0	0	-12.7125	15	18	10	3UTR
rno-miR-146a-5p	XM_017591583	Acoxl	TGAGAACTGAATTCCATGGGTT#GCCCAGTTTCGTTCTCAT#(((((((.(((.....(((((.#)))))..)))))))))).	2750	2768	1	-17.1	1	0.114019	0.5	0	0	-12.7125	15	18	10	3UTR
rno-miR-146a-5p	NM_001109568	Slc16a5	TGAGAACTGAATTCCATGGGTT#CCCATGTCAGCTCTCT#.((((.((((....((((((..#)))))))))).)))).	1702	1718	1	-17.8	0	0.113711	0.471	-0.485267	0.106776	-14.0118	14	16	10	3UTR
rno-miR-146a-5p	NM_001079766	Prpf6	TGAGAACTGAATTCCATGGGTT#AATCCAGCAGCAGTTTTCAG#(((((((((.......((((((#))))))....))))))))).	521	541	1	-15.3	1	0.106098	0.515	2.16846	2.19087	-14.4661	15	20	9	CDS
rno-miR-146a-5p	NM_012563	Gad2	TGAGAACTGAATTCCATGGGTT#AACGCCTGGGACAAGATTTGTAATCACTTTGCTCACCAAACTTTCAGTTCTCT#.((((((((((.....(((((.#.))))).......)))))))))).	1808	1861	1	-18.1	1	0.105741	0.618	2.2275	1.64067	-10.2546	15	24	10	CDS
rno-miR-146a-5p	NM_001012234	Plcz1	TGAGAACTGAATTCCATGGGTT#AGCCCATGAGTTTATTTTCC#.(((((.((((((.((((((((#))))))))))))))))))).	1280	1300	1	-17.5	0	0.103192	0.588	1.67302	1.52771	-6.19385	19	20	19	CDS
rno-miR-146a-5p	XM_008771464	Tut7	TGAGAACTGAATTCCATGGGTT#GGCCATTATTCAATGACTACAGTGTCATGGTTTTTAGTTCTTT#.((((((((((..((((((...#.))))))..)))))))))).	5034	5077	1	-20.5	1	0.100692	0.647	0	0	-8.42926	16	20	10	3UTR
rno-miR-146a-5p	XM_008771465	Tut7	TGAGAACTGAATTCCATGGGTT#GGCCATTATTCAATGACTACAGTGTCATGGTTTTTAGTTCTTT#.((((((((((..((((((...#.))))))..)))))))))).	4905	4948	1	-20.5	1	0.100692	0.647	0	0	-8.42926	16	20	10	3UTR
rno-miR-146a-5p	XM_008771466	Tut7	TGAGAACTGAATTCCATGGGTT#GGCCATTATTCAATGACTACAGTGTCATGGTTTTTAGTTCTTT#.((((((((((..((((((...#.))))))..)))))))))).	4969	5012	1	-20.5	1	0.100692	0.647	0	0	-8.42926	16	20	10	3UTR
rno-miR-146a-5p	NM_012654	Slc9a3	TGAGAACTGAATTCCATGGGTT#GACCCCTTCCAAGTTAGTTCTCC#.(((((((((.......(((((#)))))........))))))))).	3370	3393	1	-17.3	1	0.0914822	0.485	1.50904	1.63642	-13.0794	14	23	9	3UTR
rno-miR-146a-5p	NM_012747	Stat3	TGAGAACTGAATTCCATGGGTT#CATGGCTAGATTCAGTGACTCAA#((((.(((((((((((((....#)))))...))))))))..)))).	3818	3841	1	-19.2	0	0.0885409	0.485	1.67285	1.85651	-8.05661	17	23	8	3UTR
rno-miR-146a-5p	NM_001271104	Foxp2	TGAGAACTGAATTCCATGGGTT#AGCCCTAAAGGAACTTACTAAGCCAGCCCTTTGGGATTCAGAACCAACAGGCAAATTGCTTGTTTTCTTCTCT#.(((((((((((((((.(((((#.)))))..))))))))))..........................))))).	2888	2961	1	-22.6	1	0.0884566	0.662	1.69167	1.43312	-3.79332	20	50	10	3UTR
rno-miR-146a-5p	XM_017591350	Arhgef38	TGAGAACTGAATTCCATGGGTT#CCCTTTGAATTCAGTTTTA#..((((((((((((...(((..#)))...)))))))))))).	4247	4266	1	-19.2	1	0.0881129	0.721	0	0	-5.9255	15	19	12	3UTR
rno-miR-146a-5p	NM_001000613	Olr757	TGAGAACTGAATTCCATGGGTT#GGGTCACTGGAGTGATTCATGCCCTGTCACAGTTCTCT#.((((((((.....((.((((.#.))))))...)))))))).	445	483	1	-17.3	1	0.0875352	0.529	-0.16394	0.206342	-13.3534	14	19	8	CDS
rno-miR-146a-5p	NM_001109312	Vwc2	TGAGAACTGAATTCCATGGGTT#ATGGCTAGCATAGCCTGTTTCAGTTCTCAT#(((((((((((....(((((((#.)))))))))))))))))).	2002	2032	1	-20.3	1	0.0851225	0.603	-0.324174	-0.027845	-10.1658	18	20	18	3UTR
rno-miR-146a-5p	XM_006252637	Ldb3	TGAGAACTGAATTCCATGGGTT#AGCCCAGGCACCTCAGGCACCCTGGAGTTCGGGGACACCTTTAGCTCTTCCTTCTCC#.(((((((((((((((.((((.#.))))))))))))))...................))))).	567	624	1	-22.2	1	0.0830011	0.441	0	0	-3.79332	19	40	14	CDS
rno-miR-146a-5p	XM_006252641	Ldb3	TGAGAACTGAATTCCATGGGTT#AGCCCAGGCACCTCAGGCACCCTGGAGTTCGGGGACACCTTTAGCTCTTCCTTCTCC#.(((((((((((((((.((((.#.))))))))))))))...................))))).	566	623	1	-22.2	1	0.0830011	0.441	0	0	-3.79332	19	40	14	CDS
rno-miR-146a-5p	XM_006252645	Ldb3	TGAGAACTGAATTCCATGGGTT#AGCCCAGGCACCTCAGGCACCCTGGAGTTCGGGGACACCTTTAGCTCTTCCTTCTCC#.(((((((((((((((.((((.#.))))))))))))))...................))))).	566	623	1	-22.2	1	0.0830011	0.441	0	0	-3.79332	19	40	14	CDS
rno-miR-146a-5p	NM_001100682	Fcrla	TGAGAACTGAATTCCATGGGTT#CCTGTGGCCATCACTGTCCAAGAGTTGTTCGCAGCCCCAGTTCTCAA#(((((((((........(((((#.)))))))))))))).	526	573	1	-17.3	1	0.0819853	0.471	1.26973	0.447259	-14.4661	14	16	14	CDS
rno-miR-146a-5p	XM_039078415	Fbxl19	TGAGAACTGAATTCCATGGGTT#ACCCAGATTTCAGTTTTCC#.((((((((((.((..(((((.#))))))).)))))))))).	2993	3012	1	-20	1	0.0819462	0.5	0	0	-8.10863	17	19	10	3UTR
rno-miR-146a-5p	XM_001054930	Pcdhb1	TGAGAACTGAATTCCATGGGTT#ACCTATTAATACGTTCAATAGCCTAGGGAATTAAGTTACTCAA#((((((((.((((((.((((((#.)))))).)))))).)))).)))).	1027	1070	1	-21.3	1	0.0807352	0.676	0	0	-5.22701	20	25	6	5UTR
rno-miR-146a-5p	NM_001008316	Plag1	TGAGAACTGAATTCCATGGGTT#GCCCGTTCAGTTCTA#..((((((((.....((((((.#)))))))))))))).	1384	1399	1	-17.2	1	0.080575	0.559	1.1114	0.645416	-14.01	14	15	14	CDS
rno-miR-146a-5p	XM_017594897	Slc4a8	TGAGAACTGAATTCCATGGGTT#AGCCCTCCCTGTTCAGTTCTA#..((((((((((.....(((((#))))).....)))))))))).	7425	7446	1	-20.2	1	0.0799369	0.529	0	0	-8.07147	15	21	10	3UTR
rno-miR-146a-5p	NM_032055	Tap1	TGAGAACTGAATTCCATGGGTT#GGCCTATGGGTATTCTGCGGGTTCTCGA#((((((((((((((((((((((#)))))))))).))))....)))))))).	2622	2650	1	-24.4	1	0.0799288	0.603	0.104094	0.338104	-3.93757	22	28	10	3UTR
rno-miR-146a-5p	XM_006247913	Mafg	TGAGAACTGAATTCCATGGGTT#AACCTGGGGACAGCTCTGTGGCTGTTGGAGTTTAGTTTTTAT#((((((((((((((((..((((#.))))..)))))))))))))))).	4268	4310	1	-21.5	1	0.0791856	0.618	0	0	-3.93757	20	24	16	3UTR
rno-miR-146a-5p	XM_039086786	Mafg	TGAGAACTGAATTCCATGGGTT#AACCTGGGGACAGCTCTGTGGCTGTTGGAGTTTAGTTTTTAT#((((((((((((((((..((((#.))))..)))))))))))))))).	2277	2319	1	-21.5	1	0.0791856	0.618	0	0	-3.93757	20	24	16	3UTR
rno-miR-146a-5p	XM_006257360	Nxt2	TGAGAACTGAATTCCATGGGTT#AACTGATATTTAAAACTATGGTTTATTTCAGTTCTTAT#(((((((((((..((((((...#.)))))).....))))))))))).	2197	2235	1	-21.2	1	0.0789116	0.721	0	0	-8.57351	17	24	11	3UTR
rno-miR-146a-5p	XM_006257361	Nxt2	TGAGAACTGAATTCCATGGGTT#AACTGATATTTAAAACTATGGTTTATTTCAGTTCTTAT#(((((((((((..((((((...#.)))))).....))))))))))).	2108	2146	1	-21.2	1	0.0789116	0.721	0	0	-8.57351	17	24	11	3UTR
rno-miR-146a-5p	XM_003749993	Lrp8	TGAGAACTGAATTCCATGGGTT#CCCAGAAGGAATTCAGTCCCCACTAGCTCTCT#.((((((((((((((.((((..#))))...))))))))))..........)))).	4747	4779	1	-21.8	1	0.0775436	0.529	0	0	-4.02637	18	32	10	3UTR
rno-miR-146a-5p	XM_006238571	Lrp8	TGAGAACTGAATTCCATGGGTT#CCCAGAAGGAATTCAGTCCCCACTAGCTCTCT#.((((((((((((((.((((..#))))...))))))))))..........)))).	4871	4903	1	-21.8	1	0.0775436	0.529	0	0	-4.02637	18	32	10	3UTR
rno-miR-146a-5p	XM_006238574	Lrp8	TGAGAACTGAATTCCATGGGTT#CCCAGAAGGAATTCAGTCCCCACTAGCTCTCT#.((((((((((((((.((((..#))))...))))))))))..........)))).	4184	4216	1	-21.8	1	0.0775436	0.529	0	0	-4.02637	18	32	10	3UTR
rno-miR-146a-5p	XM_039111150	Lrp8	TGAGAACTGAATTCCATGGGTT#CCCAGAAGGAATTCAGTCCCCACTAGCTCTCT#.((((((((((((((.((((..#))))...))))))))))..........)))).	4789	4821	1	-21.8	1	0.0775436	0.529	0	0	-4.02637	18	32	10	3UTR
rno-miR-146a-5p	XM_039111153	Lrp8	TGAGAACTGAATTCCATGGGTT#CCCAGAAGGAATTCAGTCCCCACTAGCTCTCT#.((((((((((((((.((((..#))))...))))))))))..........)))).	4611	4643	1	-21.8	1	0.0775436	0.529	0	0	-4.02637	18	32	10	3UTR
rno-miR-146a-5p	XM_039111158	Lrp8	TGAGAACTGAATTCCATGGGTT#CCCAGAAGGAATTCAGTCCCCACTAGCTCTCT#.((((((((((((((.((((..#))))...))))))))))..........)))).	4363	4395	1	-21.8	1	0.0775436	0.529	0	0	-4.02637	18	32	10	3UTR
rno-miR-146a-5p	XM_342877	Lrp8	TGAGAACTGAATTCCATGGGTT#CCCAGAAGGAATTCAGTCCCCACTAGCTCTCT#.((((((((((((((.((((..#))))...))))))))))..........)))).	4490	4522	1	-21.8	1	0.0775436	0.529	0	0	-4.02637	18	32	10	3UTR
rno-miR-146a-5p	NM_001170594	Knl1	TGAGAACTGAATTCCATGGGTT#GACCTATGGAATTTACCTTAA#((((...(((((((((((((((#))))))))))))))).)))).	5303	5324	1	-21.1	0	0.076591	0.647	0.832919	1.19903	-11.5013	19	21	15	CDS
rno-miR-146a-5p	XM_006233246	Tlcd4	TGAGAACTGAATTCCATGGGTT#CCTCTTTAGACAGGAGAAAATGCAATTTAGTTCTCAT#(((((((((((((.(((.....#.))).))))))))))))).	1166	1203	1	-18	1	0.0765408	0.691	0	0	-4.79441	16	19	13	3UTR
rno-miR-146a-5p	NM_001099474	Vom2r57	TGAGAACTGAATTCCATGGGTT#GACCAGGGTGTTCAGTTTCTCT#.(((((((((((.((...((((#))))..)).)))))))).))).	672	694	1	-19.5	1	0.075478	0.647	0.715909	0.851672	-5.3155	17	22	8	CDS
rno-miR-146a-5p	NM_001191909	Alkbh8	TGAGAACTGAATTCCATGGGTT#GACTCATGGAATTACACCTCGA#((((...(((((((((((((((#))))))))))))).)).)))).	869	891	1	-20.3	0	0.0753774	0.588	1.83368	1.41312	-11.5013	19	22	13	CDS
rno-miR-146a-5p	NM_001107390	Tcerg1	TGAGAACTGAATTCCATGGGTT#AGCCCAGGAGAAGATGTATTTAGTAATTTCTTCTCAG#(((((((((((((((.((((((#)))))))))........))))))).......))))).	3849	3886	1	-17.8	1	0.0700377	0.676	1.24402	0.858725	-4.17062	21	37	9	3UTR
rno-miR-146a-5p	NM_013183	Mep1b	TGAGAACTGAATTCCATGGGTT#CCCTAATGGAACTCAGTTTA#...(((((((.(((((((((..#)))..)))))).))))))).	1659	1679	1	-19.2	0	0.0700188	0.5	1.1506	1.40301	-9.33931	16	20	7	CDS
rno-miR-146a-5p	NM_001108537	Gtf3c6	TGAGAACTGAATTCCATGGGTT#GACCCACAGGAATTCAGTTTTTAT#(((((((((((((((.((((((#))))))..))))))))))))))).	1317	1341	1	-27.2	1	0.0693614	0.485	-0.019984	0.0933273	-4.17062	21	24	15	3UTR
rno-miR-146a-5p	NM_019621	Dlg4	TGAGAACTGAATTCCATGGGTT#CCCATGCCATTTGAGTTCTCAT#((((((((.((...((((((..#))))))....)).)))))))).	2682	2704	1	-21.5	1	0.0652535	0.618	0.469338	1.022	-10.4867	16	22	8	3UTR
rno-miR-146a-5p	XM_039085766	Dlg4	TGAGAACTGAATTCCATGGGTT#CCCATGCCATTTGAGTTCTCAT#((((((((.((...((((((..#))))))....)).)))))))).	2670	2692	1	-21.5	1	0.0652535	0.618	0	0	-10.4867	16	22	8	3UTR
rno-miR-146a-5p	XM_039085768	Dlg4	TGAGAACTGAATTCCATGGGTT#CCCATGCCATTTGAGTTCTCAT#((((((((.((...((((((..#))))))....)).)))))))).	2569	2591	1	-21.5	1	0.0652535	0.618	0	0	-10.4867	16	22	8	3UTR
rno-miR-146a-5p	NM_001009601	Klc4	TGAGAACTGAATTCCATGGGTT#CCCATGGCTCCAGTCTCT#.(((.((((....(((((((..#)))))))...))))))).	2225	2243	1	-19.7	0	0.0645854	0.441	0.432326	0.247728	-16.6156	14	18	7	3UTR
rno-miR-146a-5p	XM_017592013	Epb41l1	TGAGAACTGAATTCCATGGGTT#GCCTTGGTTTTTTCGGTTCTCT#.((((((((((..(((.((((.#)))))))....)))))))))).	3972	3994	1	-20.9	1	0.0634882	0.529	0	0	-8.42926	17	22	10	3UTR
rno-miR-146a-5p	XM_039105762	Epb41l1	TGAGAACTGAATTCCATGGGTT#GCCTTGGTTTTTTCGGTTCTCT#.((((((((((..(((.((((.#)))))))....)))))))))).	3600	3622	1	-20.9	1	0.0634882	0.529	0	0	-8.42926	17	22	10	3UTR
rno-miR-146a-5p	XM_017593736	Ptpn3	TGAGAACTGAATTCCATGGGTT#GCACCAGGCTCCTTCTCCCCAGATGGAGTTGACCAGCAGTTCTTAG#((((((((((((((((((((..#.))))..)))))))......))))))))).	1422	1468	1	-22	1	0.0629629	0.471	0	0	-3.93757	20	30	9	CDS
rno-miR-146a-5p	XM_001059757	Ptpn3	TGAGAACTGAATTCCATGGGTT#CCCAGATGGAGTTGACCAGCAGTTCTTAG#((((((((((((((((((((..#))))..)))))))......))))))))).	1743	1772	1	-21.6	1	0.0629629	0.471	0	0	-3.93757	20	29	9	CDS
rno-miR-146a-5p	XM_039092480	Fads2	TGAGAACTGAATTCCATGGGTT#GACCTACCCTATCCTCATGGAGTTCCCCCTTTGTCAGTTCCAG#((.(((((((((((((((((..#.))))))))))..........))))))))).	1748	1791	1	-21.6	0	0.0625655	0.397	0	0	-5.49511	19	31	10	3UTR
rno-miR-146a-5p	XM_039103194	Dab2	TGAGAACTGAATTCCATGGGTT#GGCCCATGGAAACTTACATCTCG#.((((..(((.(((((((((((#)))))))))))..)))..)))).	2577	2600	1	-21.3	0	0.0620781	0.5	0	0	-10.0627	18	23	11	3UTR
rno-miR-146a-5p	XM_003749396	Etnppl	TGAGAACTGAATTCCATGGGTT#GATCTCTGAACCATCATGGAGTTTATTTCCTGTTCTCT#.(((((((((((((((((((((#.))))..)))))))))))......)))))).	3334	3372	1	-21.9	1	0.0614799	0.544	0	0	-3.79332	21	31	11	3UTR
rno-miR-146a-5p	NM_001106615	Arpc4	TGAGAACTGAATTCCATGGGTT#AACCTGTGGAGGGTTATGACATCAGCTTTCTCAT#((((((((((.(((((((((((#)))))))))))..........))))..)))))).	349	383	1	-19.7	1	0.0613222	0.544	2.18777	2.52041	-6.76235	21	34	11	CDS
rno-miR-146a-5p	NM_022631	Wnt5a	TGAGAACTGAATTCCATGGGTT#AAGCCATGAAGTTCATTCTCT#.(((((.((((((.(((((.((#)).))))).))))))))))).	3504	3525	1	-18.8	0	0.0601089	0.603	0.573916	0.734657	-6.19385	18	21	11	3UTR
rno-miR-146a-5p	XM_006241396	Gns	TGAGAACTGAATTCCATGGGTT#CCCATGACGAATTCCTCAATAAAGTTCTTAG#((((((((((((((((((((..#))))))..))))))........)))))))).	912	943	1	-20.4	1	0.059954	0.544	0	0	-3.93757	20	31	8	CDS
rno-miR-146a-5p	XM_008766334	Csnk1g1	TGAGAACTGAATTCCATGGGTT#AGCCCATGGTTTGTTTGGTTTTTG#.(((((((((((.(((((((((#)))))))))...))))))))))).	2557	2581	1	-22.7	1	0.0598693	0.632	0	0	-5.08246	20	24	11	3UTR
rno-miR-146a-5p	NM_053646	Asah2	TGAGAACTGAATTCCATGGGTT#AACCCAAAGAATTCAGC#......((((((((..((((((#))))))..)))))))).	2101	2118	1	-18.3	0	0.0596529	0.559	0.272425	0.312146	-16.5351	14	17	8	CDS
rno-miR-146a-5p	NM_001009503	Pfn4	TGAGAACTGAATTCCATGGGTT#CCCATCAATCAGTTCTCAG#((((((((((.....(((((..#)))))...)))))))))).	104	123	1	-20.4	1	0.0594444	0.441	-0.101248	-0.278016	-12.9906	15	19	10	5UTR
rno-miR-146a-5p	XM_039093320	Lats2	TGAGAACTGAATTCCATGGGTT#CCCGTGAAACTCAGTTCTCT#.(((((((((.((.((((((..#)))))).)).))))))))).	4328	4348	1	-23.6	1	0.059386	0.5	0	0	-7.47494	17	20	9	3UTR
rno-miR-146a-5p	NM_001012152	Tbc1d14	TGAGAACTGAATTCCATGGGTT#AACCTGTGGGCATGCATGAAGTTCTCC#.(((((((..((((((((((((#)))))))))).....))..))))))).	3281	3308	1	-20.2	1	0.0592228	0.529	0.0727375	-0.0888105	-6.09222	19	27	10	3UTR
rno-miR-146a-5p	NM_001034021	Tbc1d14	TGAGAACTGAATTCCATGGGTT#AACCTGTGGGCATGCATGAAGTTCTCC#.(((((((..((((((((((((#)))))))))).....))..))))))).	4143	4170	1	-20.2	1	0.0592228	0.529	0.0727375	-0.0888105	-6.09222	19	27	10	3UTR
rno-miR-146a-5p	NM_001113365	Tbc1d14	TGAGAACTGAATTCCATGGGTT#AACCTGTGGGCATGCATGAAGTTCTCC#.(((((((..((((((((((((#)))))))))).....))..))))))).	4370	4397	1	-20.2	1	0.0592228	0.529	0.0727375	-0.0888105	-6.09222	19	27	10	3UTR
rno-miR-146a-5p	XM_003750561	Atr	TGAGAACTGAATTCCATGGGTT#GACCCAGGACGATTAGATTTCTCAA#((((((((((..(((.((((((#)))))))))...))))..)))))).	4176	4201	1	-18.9	1	0.0588451	0.603	0	0	-10.3422	19	25	9	CDS
rno-miR-146a-5p	XM_006243600	Atr	TGAGAACTGAATTCCATGGGTT#GACCCAGGACGATTAGATTTCTCAA#((((((((((..(((.((((((#)))))))))...))))..)))))).	4479	4504	1	-18.9	1	0.0588451	0.603	0	0	-10.3422	19	25	9	CDS
rno-miR-146a-5p	NM_080403	Sox9	TGAGAACTGAATTCCATGGGTT#AGCCCTGGTTTCGTTCTCT#.((((((.(((..(((.(((((#)))))))).))))))))).	58	77	1	-19.7	1	0.0575071	0.441	0.324543	0.39385	-10.7429	17	19	9	5UTR
rno-miR-146a-5p	NM_001105851	Otop2	TGAGAACTGAATTCCATGGGTT#GCCCTGGGCCAGTATGCCATCTCC#.((((((((...((((.((((.#)))))))).))))......)))).	1222	1246	1	-15.5	1	0.056746	0.368	1.3099	1.33835	-11.2074	16	24	8	CDS
rno-miR-146a-5p	NM_001191579	Elmod1	TGAGAACTGAATTCCATGGGTT#AACCCATACTTAGTTCTTAG#((((((((((.....(((((((#)))))))..)))))))))).	2010	2030	1	-17.6	1	0.0557908	0.529	1.79957	1.83939	-12.9906	17	20	10	3UTR
rno-miR-146a-5p	XM_006243083	Elmod1	TGAGAACTGAATTCCATGGGTT#AACCCATACTTAGTTCTTAG#((((((((((.....(((((((#)))))))..)))))))))).	2193	2213	1	-17.6	1	0.0557908	0.529	0	0	-12.9906	17	20	10	3UTR
rno-miR-146a-5p	XM_039094189	LOC102548067	TGAGAACTGAATTCCATGGGTT#TGCATCTGGTTCAGTTCTTAT#(((((((((((((..(((.(..#).)))..))))))))))))).	408	429	1	-17.2	1	0.0544456	0.662	0	0	-5.52986	17	21	13	CDS
rno-miR-146a-5p	XM_006251478	Spata48	TGAGAACTGAATTCCATGGGTT#TCCATGGGTTACAGTTCTA#..(((((((...((((((((..#))))))))...))))))).	1609	1628	1	-21.2	1	0.053832	0.588	0	0	-12.3711	15	19	8	5UTR
rno-miR-146a-5p	NM_001108327	Prkdc	TGAGAACTGAATTCCATGGGTT#CTCAACTGGAGTTCAGAGCTATTCATACAGTTCTCAA#((((((((((((((((((((..#))))..)))))))))..............))))))).	6142	6179	1	-20.2	1	0.0537401	0.574	0	0	-3.93757	20	37	9	CDS
rno-miR-146a-5p	XM_039088537	Prkdc	TGAGAACTGAATTCCATGGGTT#CTCAACTGGAGTTCAGAGCTATTCATACAGTTCTCAA#((((((((((((((((((((..#))))..)))))))))..............))))))).	6041	6078	1	-20.2	1	0.0537401	0.574	0	0	-3.93757	20	37	9	CDS
rno-miR-146a-5p	NM_153470	Lzts1	TGAGAACTGAATTCCATGGGTT#AGCCCTCAGTTCTCAG#((((((((((.......(((((#))))))))))))))).	3852	3868	1	-19	1	0.0530359	0.515	0.0668692	0.295927	-13.2236	15	16	15	3UTR
rno-miR-146a-5p	NM_001024982	Cpne9	TGAGAACTGAATTCCATGGGTT#GGCCCAGAATCAGTTCACAG#((.((((((.((((..((((((#)))))))))))))))).)).	827	847	1	-18	0	0.0525584	0.485	1.24733	2.0735	-7.70612	18	20	16	CDS
rno-miR-146a-5p	NM_001099516	Vom2r71	TGAGAACTGAATTCCATGGGTT#GACTTGGATAGGACTGGTCATAACAGATGATGACCAGGGAATTCAGTTACTCAC#(((((((((((((((...((((#.))))..))))))))))).)))).	620	674	1	-24.3	1	0.052133	0.588	0.421507	0.33251	-4.17062	19	24	11	CDS
rno-miR-146a-5p	NM_053656	P2rx2	TGAGAACTGAATTCCATGGGTT#ACCCCAAGTTCAAGTTCTCAA#(((((((((((((....((((.#))))..)))))).))))))).	613	634	1	-18.5	1	0.0511118	0.529	1.46935	1.23145	-5.76291	17	21	7	CDS
rno-miR-146a-5p	NM_173320	Vom2r75	TGAGAACTGAATTCCATGGGTT#GACCCATAGGAATACAAAGCAGTCTCAA#((((.((((.((((((((((((#))))))).)))))......)))))))).	3041	3069	1	-20.8	0	0.0510034	0.5	0.707443	0.337182	-9.29912	20	28	8	3UTR
rno-miR-146a-5p	XM_006254377	Vom2r75	TGAGAACTGAATTCCATGGGTT#GACCCATAGGAATACAAAGCAGTCTCAA#((((.((((.((((((((((((#))))))).)))))......)))))))).	6398	6426	1	-20.8	0	0.0510034	0.5	0	0	-9.29912	20	28	8	3UTR
rno-miR-146a-5p	XM_039079193	Phf20l1	TGAGAACTGAATTCCATGGGTT#CCTCTTCAGCAACTGATGGGAAAGTATTCTCCATCAGTTCTCAG#((((((((((.((((((.((((#.)))).))))))............)))))))))).	1396	1440	1	-22.7	1	0.0508665	0.574	0	0	-6.76235	20	35	10	CDS
rno-miR-146a-5p	NM_001271439	Phf20l1	TGAGAACTGAATTCCATGGGTT#AACTGATGGGAAAGTATTCTCCATCAGTTCTCAG#((((((((((.((((((.((((#)))).))))))............)))))))))).	1625	1659	1	-22.4	1	0.0508665	0.574	0.927	1.18366	-6.76235	20	34	10	CDS
rno-miR-146a-5p	NM_001106972	RGD1309748	TGAGAACTGAATTCCATGGGTT#GCCCAGTTTTCAGTTTTCAA#(((((((((((..(..(((((.#))))))..))))))))))).	1604	1624	1	-20.7	1	0.0506408	0.647	1.40323	1.00257	-9.54201	17	20	11	3UTR
rno-miR-146a-5p	XM_039092268	Abcg3	TGAGAACTGAATTCCATGGGTT#CTCATGGATTCAGTACTTT#.(((.((((((.((((((((..#)))))))))))))).))).	1926	1945	1	-20.3	0	0.050085	0.588	0	0	-11.2592	17	19	14	CDS
rno-miR-146a-5p	NM_001025004	Vsig4	TGAGAACTGAATTCCATGGGTT#GCCTGTGACTTATTCAGTTCTTG#.(((((((((((..(((((((.#)))))))....))))))))))).	975	998	1	-21.1	1	0.0500573	0.559	0.531342	0.524157	-5.9393	18	23	11	3UTR
rno-miR-146a-5p	NM_001107500	Zfp84	TGAGAACTGAATTCCATGGGTT#AGACTATGGTTTTATCAGTTTTCT#.(((((((((...((((((...#.)))))).....))))))))).	5797	5821	1	-18.7	1	0.0494484	0.676	0.441147	0.206837	-11.254	15	22	9	3UTR
rno-miR-146a-5p	XM_039094154	Dlgap2	TGAGAACTGAATTCCATGGGTT#ACCCATGGACCAGCCATTTTCTCC#.((((((((...(((((((((.#))))))))).))).....))))).	7489	7513	1	-20.6	1	0.0485515	0.529	0	0	-11.2074	17	24	9	3UTR
rno-miR-146a-5p	XM_039088992	LOC100912028	TGAGAACTGAATTCCATGGGTT#GCTCATGGCTATTTTAGTTTTCC#.((((((((((..((((((((.#))))))))....)))))))))).	11222	11245	1	-20.4	1	0.0481447	0.691	0	0	-8.42926	18	23	10	3UTR
rno-miR-146a-5p	NM_001108954	B3galt1	TGAGAACTGAATTCCATGGGTT#AGCCCATGGACACCCACCAAGCAATTCCTCTCT#.((((...((((((((((((((#)))))))))).............)))).)))).	135	168	1	-19.4	0	0.0474701	0.588	0.214457	0.42283	-9.55161	18	33	10	5UTR
rno-miR-146a-5p	XM_001072500	Trabd2b	TGAGAACTGAATTCCATGGGTT#GACCCAGGAGTCCATCAGCAGTTTCTCAG#(((((((((((((((.((((((#)))))))))))...))))....)))))).	4773	4802	1	-22.1	1	0.0473399	0.544	0	0	-4.17062	21	29	11	3UTR
rno-miR-146a-5p	XM_006236984	Lrrn1	TGAGAACTGAATTCCATGGGTT#TTGGTGGATAAAAATCTATAAAGTTTAGTTCTCT#.((((((((((((..(((((((#.)))))))..)))))))))))).	6299	6333	1	-19.9	1	0.0468436	0.647	0	0	-5.38561	19	23	12	3UTR
rno-miR-146a-5p	XM_017592833	Lrrn1	TGAGAACTGAATTCCATGGGTT#TTGGTGGATAAAAATCTATAAAGTTTAGTTCTCT#.((((((((((((..(((((((#.)))))))..)))))))))))).	6389	6423	1	-19.9	1	0.0468436	0.647	0	0	-5.38561	19	23	12	3UTR
rno-miR-146a-5p	XM_039090900	Uchl5	TGAGAACTGAATTCCATGGGTT#AACCCATGGATACAGATCA#...((.(((...((((((((((#))))))))))..))).)).	859	878	1	-20	0	0.045108	0.544	0	0	-15.8296	15	19	10	CDS
rno-miR-146a-5p	NM_001106818	Mpzl2	TGAGAACTGAATTCCATGGGTT#AACCCAGTTCAGTTCTCAG#((((((((((((....((((((#)))))))))))))))))).	1474	1493	1	-23.9	1	0.0445792	0.529	-0.00133117	0.0712224	-7.05204	18	19	18	3UTR
rno-miR-146a-5p	XM_039098624	Mcu	TGAGAACTGAATTCCATGGGTT#GGCCTGTGGGAGTCAAGTA#.....(((((.(((((((((((#))))))))))).))).)).	787	806	1	-16.7	0	0.0435302	0.441	0	0	-16.4904	16	19	11	5UTR
rno-miR-146a-5p	XM_039110333	Macf1	TGAGAACTGAATTCCATGGGTT#GCCTTCTTCTCCAGCCACCCCAGCCAGTGGGACCAAGACTCCACTTCAGTTCTCT#.((((((((((((((((.((((#.)))).))))))............)))))))))).	22252	22307	1	-23.1	1	0.0431648	0.471	0	0	-3.79332	20	35	10	CDS
rno-miR-146a-5p	XM_039110335	Macf1	TGAGAACTGAATTCCATGGGTT#GCCTTCTTCTCCAGCCACCCCAGCCAGTGGGACCAAGACTCCACTTCAGTTCTCT#.((((((((((((((((.((((#.)))).))))))............)))))))))).	16544	16599	1	-23.1	1	0.0431648	0.471	0	0	-3.79332	20	35	10	CDS
rno-miR-146a-5p	XM_039110338	Macf1	TGAGAACTGAATTCCATGGGTT#GCCTTCTTCTCCAGCCACCCCAGCCAGTGGGACCAAGACTCCACTTCAGTTCTCT#.((((((((((((((((.((((#.)))).))))))............)))))))))).	22228	22283	1	-23.1	1	0.0431648	0.471	0	0	-3.79332	20	35	10	CDS
rno-miR-146a-5p	XM_039110340	Macf1	TGAGAACTGAATTCCATGGGTT#GCCTTCTTCTCCAGCCACCCCAGCCAGTGGGACCAAGACTCCACTTCAGTTCTCT#.((((((((((((((((.((((#.)))).))))))............)))))))))).	22132	22187	1	-23.1	1	0.0431648	0.471	0	0	-3.79332	20	35	10	CDS
rno-miR-146a-5p	XM_039110332	Macf1	TGAGAACTGAATTCCATGGGTT#AGCCAGTGGGACCAAGACTCCACTTCAGTTCTCT#.((((((((((((((((.((((#)))).))))))............)))))))))).	22901	22935	1	-22.8	1	0.0431648	0.471	0	0	-3.79332	20	34	10	CDS
rno-miR-146a-5p	XM_039084555	Ercc5	TGAGAACTGAATTCCATGGGTT#GGCCCATTTTGTGTCCCCCGTGTTTTAGTTCTCAC#(((((((((((...((((((..#.)))))).))))))))))).	125	160	1	-22.8	1	0.0422203	0.5	0	0	-9.43035	17	20	11	5UTR
rno-miR-146a-5p	NM_001106880	Plcl2	TGAGAACTGAATTCCATGGGTT#TCCTTTTAGTTCAGTTTTCAA#(((((((((((((....(((..#)))....))))))))))))).	1008	1029	1	-17.7	1	0.0419484	0.662	1.73544	1.31793	-5.76291	16	21	13	CDS
rno-miR-146a-5p	XM_039083164	Plcl2	TGAGAACTGAATTCCATGGGTT#TCCTTTTAGTTCAGTTTTCAA#(((((((((((((....(((..#)))....))))))))))))).	1458	1479	1	-17.7	1	0.0419484	0.662	0	0	-5.76291	16	21	13	CDS
rno-miR-146a-5p	NM_172031	Bpifa1	TGAGAACTGAATTCCATGGGTT#GATCCATGGAATACAATTTGTCAT#(((.((.((.((((((((((((#)))))))))))).))..)).))).	821	845	1	-19.3	0	0.0417938	0.588	0.625921	0.319615	-9.75579	19	24	12	CDS
rno-miR-146a-5p	NM_001014054	Tmem168	TGAGAACTGAATTCCATGGGTT#CTCAGGGTAATTTAGTTTTCT#.((((((((((((((.((((..#)))).)).)))))))))))).	3117	3138	1	-18.8	1	0.0410872	0.676	1.64171	1.41302	-4.02637	18	21	12	3UTR
rno-miR-146a-5p	XM_039106570	Fastkd5	TGAGAACTGAATTCCATGGGTT#ACCCTGGACTTCAAATCTCAA#(((((..((((.((((.((((.#)))))))).))))..))))).	2787	2808	1	-20.6	0	0.0407119	0.588	0	0	-10.729	17	21	8	3UTR
rno-miR-146a-5p	XM_039106573	Fastkd5	TGAGAACTGAATTCCATGGGTT#ACCCTGGACTTCAAATCTCAA#(((((..((((.((((.((((.#)))))))).))))..))))).	2755	2776	1	-20.6	0	0.0407119	0.588	0	0	-10.729	17	21	8	3UTR
rno-miR-146a-5p	NM_019353	Tpo	TGAGAACTGAATTCCATGGGTT#TCCAGATACATTCAGTTCTCT#.(((((((((((....((((..#)))).....))))))))))).	3123	3144	1	-19.3	1	0.0404867	0.603	0.342445	0.0309946	-6.90779	15	21	11	3UTR
rno-miR-146a-5p	NM_001107446	Pdzd8	TGAGAACTGAATTCCATGGGTT#GACAAGATGTATCTAAAGTGCCACGGGTACAGTCACGTTCAGTTCTCT#.((((((((((((((.(((...#.))).))).........))))))))))).	3729	3777	1	-20.6	1	0.0400431	0.529	1.07784	1.84202	-4.02637	17	29	11	3UTR
rno-miR-146a-5p	NM_001109625	Capza1	TGAGAACTGAATTCCATGGGTT#CATGGATCAGTTCA#...(((((((..((((((....#))))))))))))).	460	474	1	-18	0	0.0399733	0.529	1.04602	0.574912	-12.6861	13	14	13	CDS
rno-miR-146a-5p	XM_006241519	Tspyl5	TGAGAACTGAATTCCATGGGTT#GGCTCTTCTCATGGGAATTCAGTATTTCTAACATCTCGA#((((((((((((((((((((..#.))))))).))))))))..........))))).	4235	4274	1	-21.8	1	0.0393699	0.603	0	0	-3.93757	20	33	8	3UTR
rno-miR-146a-5p	XM_039112507	Trmt5	TGAGAACTGAATTCCATGGGTT#AACCCAGGAATCACCTCAG#((((...((.(((((.((((((#))))))))))))).)))).	826	845	1	-17.8	0	0.0392589	0.603	0	0	-12.9768	17	19	13	CDS
rno-miR-146a-5p	NM_001007007	Rnaseh2b	TGAGAACTGAATTCCATGGGTT#ACCCATGGACCCTTTATTTCTG#..((((.((((.(((((((((.#)))))))))...)))).)))).	273	295	1	-19	0	0.0389533	0.529	1.01832	1.17311	-9.84749	17	22	9	CDS
rno-miR-146a-5p	NM_053621	Magi2	TGAGAACTGAATTCCATGGGTT#ACCCAGGACCAGTTTTCGA#(((((((((...(((.(((((.#)))))))).))))))))).	2429	2448	1	-20.7	1	0.0386074	0.529	0.935243	1.61327	-11.5847	17	19	9	CDS
rno-miR-146a-5p	NM_053963	Mmp12	TGAGAACTGAATTCCATGGGTT#CCCAGGAATCAGGCCAAAAATTGATGCAGTTCTCT#.((((((((.(((((.((((..#))))))))).................)))))))).	1297	1332	1	-19.8	1	0.0384548	0.603	1.47196	0.703499	-5.26888	17	35	9	CDS
rno-miR-146a-5p	NM_031701	Cldn5	TGAGAACTGAATTCCATGGGTT#GGCCTCGTGTGCTGTGGCGCCTGGGTTTGCACCGGGCGTCCAGAGTTCAGTTTTCC#.(((((((((((((..((((..#.))))))))))))))))).	676	732	1	-19.7	1	0.0383668	0.426	1.62809	1.38897	-4.76182	17	19	17	CDS
rno-miR-146a-5p	XM_039084216	Mea1	TGAGAACTGAATTCCATGGGTT#GACCCACTTTATTCAGTTCTG#..((((((((((....((((((#))))))....)))))))))).	688	709	1	-21.4	1	0.0381712	0.5	0	0	-8.07147	16	21	10	3UTR
rno-miR-146a-5p	NM_022280	Lrat	TGAGAACTGAATTCCATGGGTT#AACCCATGGTGGCAGGTAATGAATTTCTCT#.((((((((....(((((((((#)))))))))...))).........))))).	3830	3860	1	-20.3	1	0.0380924	0.632	0.331327	0.169473	-12.4965	17	30	9	3UTR
rno-miR-146a-5p	NM_138510	Akr1c3	TGAGAACTGAATTCCATGGGTT#ACCCCAGTTCTCT#.((((((((........((((.#)))))))))))).	730	743	1	-15	1	0.0379702	0.618	0.647899	0.144889	-14.3219	12	13	12	CDS
rno-miR-146a-5p	NM_001107958	Tal1	TGAGAACTGAATTCCATGGGTT#GATCTAAGGAAGACCCCGAATTCCGTTCTCAT#(((((((.((((((...(((((#.))))).)))))).))))))).	3554	3586	1	-22.9	1	0.0378982	0.574	-0.154733	-0.165463	-7.21971	18	22	7	3UTR
rno-miR-146a-5p	XM_006238618	Tal1	TGAGAACTGAATTCCATGGGTT#GATCTAAGGAAGACCCCGAATTCCGTTCTCAT#(((((((.((((((...(((((#.))))).)))))).))))))).	3256	3288	1	-22.9	1	0.0378982	0.574	0	0	-7.21971	18	22	7	3UTR
rno-miR-146a-5p	XM_039108587	LOC103690031	TGAGAACTGAATTCCATGGGTT#AATCTATGGCACAGTTTTTAT#(((((((((....(((((((((#)))))))))..))))))))).	3991	4012	1	-17.2	1	0.037649	0.588	0	0	-12.6408	18	21	9	CDS
rno-miR-146a-5p	XM_039108588	LOC103690031	TGAGAACTGAATTCCATGGGTT#AATCTATGGCACAGTTTTTAT#(((((((((....(((((((((#)))))))))..))))))))).	4181	4202	1	-17.2	1	0.037649	0.588	0	0	-12.6408	18	21	9	CDS
rno-miR-146a-5p	XM_039108589	LOC103690031	TGAGAACTGAATTCCATGGGTT#AATCTATGGCACAGTTTTTAT#(((((((((....(((((((((#)))))))))..))))))))).	4135	4156	1	-17.2	1	0.037649	0.588	0	0	-12.6408	18	21	9	CDS
rno-miR-146a-5p	XM_039108592	LOC103690031	TGAGAACTGAATTCCATGGGTT#AATCTATGGCACAGTTTTTAT#(((((((((....(((((((((#)))))))))..))))))))).	3958	3979	1	-17.2	1	0.037649	0.588	0	0	-12.6408	18	21	9	CDS
rno-miR-146a-5p	NM_001108569	Gbp5	TGAGAACTGAATTCCATGGGTT#GGCTTTTCCGTGGGCTCCACTGTTCAGTCTCAC#((((.(((((((((((((((..#.)))))))).......))))))))))).	432	465	1	-21.2	0	0.036643	0.441	1.2553	1.9806	-8.05661	19	28	11	CDS
rno-miR-146a-5p	NM_001106848	Rnf7	TGAGAACTGAATTCCATGGGTT#AACCCATGGTATCTTCTTTTCTA#..((((..(((..(((((((((#)))))))))....)))..)))).	833	856	1	-18.7	0	0.0356181	0.603	0.669906	0.554373	-13.4503	16	23	9	3UTR
rno-miR-146a-5p	NM_001108233	Farp2	TGAGAACTGAATTCCATGGGTT#ACCCGTGTGAATTCAA#.......((((((((((((((.#))))))).))))))).	3779	3795	1	-19	0	0.0355055	0.515	-0.291942	-0.199427	-17.1102	14	16	7	3UTR
rno-miR-146a-5p	XM_008763836	Oog3	TGAGAACTGAATTCCATGGGTT#CCCATGTGAATTATGATCTCC#.((((.(..(((((((((((..#)))))).)))))..).)))).	1930	1951	1	-19.5	0	0.035283	0.588	0	0	-9.06431	16	21	6	5UTR
rno-miR-146a-5p	XM_039092551	Apba1	TGAGAACTGAATTCCATGGGTT#GGCCCGTGGACGGAGATTCTCCGTCTCCTGGCAGTTCCTCAC#(((((((((...((((((((((#)))))))))).....................)))))).))).	1546	1588	1	-21.7	1	0.0341787	0.397	0	0	-11.3517	19	42	10	CDS
rno-miR-146a-5p	NM_001106160	Trappc8	TGAGAACTGAATTCCATGGGTT#AACCCATGGAACAGTTTTCAA#(((((((((..(((((((((((#)))))))))))))))))))).	496	517	1	-27.7	1	0.0340818	0.559	2.0652	2.13145	-8.00486	20	21	20	CDS
rno-miR-146a-5p	NM_001000472	Olr1323	TGAGAACTGAATTCCATGGGTT#GCTCACAGTGGTGGGGAACCTGGGCATGATCACCCTGATACTATTCAGTTCTCAA#((((((((((((.....((((.#.)))).......)))))))))))).	107	162	1	-22.4	1	0.0339617	0.574	1.39801	0.778635	-7.05204	16	25	12	CDS
rno-miR-146a-5p	NM_001109281	Tmem198b	TGAGAACTGAATTCCATGGGTT#AGCCCCGGGAGTTCTCCAATCCTCAG#((((....(((((((..(((((#)))))..))))))).......)))).	247	273	1	-18.3	0	0.0339417	0.471	0.330038	0.432162	-14.0479	16	26	7	5UTR
rno-miR-146a-5p	NM_017071	Insr	TGAGAACTGAATTCCATGGGTT#TCCTGGGATTCATGCTGTTCTACAA#((((((((((((((((.(((..#))))))))))))....))))).)).	1927	1952	1	-18.3	1	0.0334885	0.5	2.2369	1.56905	-3.93757	19	25	12	CDS
rno-miR-146a-5p	NM_133306	Olr1	TGAGAACTGAATTCCATGGGTT#GCCCATGGACGATTCTGGTTTCTCAT#(((((((((((((((((((((.#)))))))))..)))).)))).)))).	2996	3022	1	-24.3	1	0.0333201	0.515	0.487628	0.380835	-3.93757	21	26	9	3UTR
rno-miR-146a-5p	XM_006229598	Irak1	TGAGAACTGAATTCCATGGGTT#GGCCCCTGGAATTTGTTCTTT#.((((((.((((((((.(((((#))))).)))))))))))))).	3333	3354	1	-22.3	1	0.0332046	0.515	0	0	-6.10696	19	21	14	3UTR
rno-miR-146a-5p	NM_001011903	Tpst1	TGAGAACTGAATTCCATGGGTT#GATGAGGACGCTCTTAAAGTTCCTCCATATTCCATGGAACCATTCAGTTTTACAC#((((((((((((((((((((..#.))))))))...)))))))))).)).	1001	1056	1	-21.9	1	0.0331708	0.529	1.97152	1.90338	-3.93757	20	26	10	CDS
rno-miR-146a-5p	XM_006249234	Tpst1	TGAGAACTGAATTCCATGGGTT#GATGAGGACGCTCTTAAAGTTCCTCCATATTCCATGGAACCATTCAGTTTTACAC#((((((((((((((((((((..#.))))))))...)))))))))).)).	1032	1087	1	-21.9	1	0.0331708	0.529	0	0	-3.93757	20	26	10	CDS
rno-miR-146a-5p	NM_001040155	Zmym3	TGAGAACTGAATTCCATGGGTT#ATGGAATCAACAGTTCTCAG#(((((((((.(((((((.....#)))))))...))))))))).	732	752	1	-20.6	1	0.0331602	0.456	0.601978	0.279822	-5.18008	16	20	9	CDS
rno-miR-146a-5p	XM_006240697	Itgb8	TGAGAACTGAATTCCATGGGTT#CCAGGAATTCAGTG#.....((((((((((.(((...#))))))))))))).	5420	5434	1	-18.9	0	0.0331066	0.574	0	0	-13.8986	13	14	13	3UTR
rno-miR-146a-5p	NM_001134447	Spopl	TGAGAACTGAATTCCATGGGTT#TCCATGATTCAGTCTCGT#((((.(((((((..((((((..#))))))))))))))))).	1235	1253	1	-18.2	0	0.0329165	0.5	2.95848	2.29447	-10.2026	17	18	17	CDS
rno-miR-146a-5p	XM_039110526	Sntg1	TGAGAACTGAATTCCATGGGTT#GTGGAGTTGAAGTTCTTAG#((((((((.((((((((.....#))))))))..)))))))).	1196	1215	1	-17.9	1	0.0321787	0.426	0	0	-4.99396	16	19	8	5UTR
rno-miR-146a-5p	NM_032071	Synj2	TGAGAACTGAATTCCATGGGTT#AACTTATGGAATTTGATCAGTTA#....((((((((((((((((((#))))))))))))....)))))).	2345	2368	1	-18.7	0	0.032038	0.632	1.99344	1.91608	-9.54656	18	23	12	CDS
rno-miR-146a-5p	XM_039092680	Synj2	TGAGAACTGAATTCCATGGGTT#AACTTATGGAATTTGATCAGTTA#....((((((((((((((((((#))))))))))))....)))))).	2408	2431	1	-18.7	0	0.032038	0.632	0	0	-9.54656	18	23	12	CDS
rno-miR-146a-5p	XM_039099084	Derl3	TGAGAACTGAATTCCATGGGTT#GGCCCCTGGGATTCGGCTTCTTT#.(((((((((((((((.(((((#))))).)))))))))).))))).	1757	1780	1	-25	1	0.0318606	0.456	0	0	-3.79332	20	23	10	CDS
rno-miR-146a-5p	NM_001024790	Usp7	TGAGAACTGAATTCCATGGGTT#CCCATGTTGCTTCAGTTTTTC#.((((((((((...((((((..#))))))....)))))))))).	2502	2523	1	-18.8	1	0.0314615	0.471	2.12404	2.29278	-9.2861	16	21	10	CDS
rno-miR-146a-5p	NM_001166678	Tas2r136	TGAGAACTGAATTCCATGGGTT#ATCCATGGTCTGTTTTCT#.((((((.((...((((((((.#)))))))))).)))))).	635	653	1	-17.2	1	0.0312972	0.618	0.123707	0.284262	-13.5677	16	18	10	CDS
rno-miR-146a-5p	XM_006247128	Stxbp4	TGAGAACTGAATTCCATGGGTT#GCCCGTGGAATTTAA#.......((((((((((((((.#)))))))))))))).	5982	5997	1	-20.9	0	0.0308631	0.618	0	0	-17.1102	14	15	14	3UTR
rno-miR-146a-5p	XM_003751342	Odaph	TGAGAACTGAATTCCATGGGTT#AGCCCATGTGGAGCCCAGACATCTCTGCCTATCGACCAGTATGTAGTTCTCAG#(((((((((..(((((((((((#)))))))).)))..).............................)))))))).	2483	2536	1	-20.1	1	0.0306569	0.471	0	0	-8.00486	20	53	8	5UTR
rno-miR-146a-5p	NM_001012116	Spag1	TGAGAACTGAATTCCATGGGTT#AACCCAGGTCTTCCGTTCTTT#.((((((.(((..((.((((((#))))))))..))).)))))).	3284	3305	1	-19.6	1	0.0290697	0.603	0.354362	0.188423	-10.9759	17	21	8	3UTR
rno-miR-146a-5p	XM_039087769	Eftud2	TGAGAACTGAATTCCATGGGTT#GCCATACTACTAAGATGTACAGCACAGATGATGGAGTTCAGTTTCAC#((((.((((((((((((.(...#.).)))))))))))))))).	1455	1502	1	-19.9	0	0.0289291	0.485	0	0	-8.05661	17	20	16	CDS
rno-miR-146a-5p	NM_001134800	Zbed4	TGAGAACTGAATTCCATGGGTT#CCCATGGACAGTCTCAA#((((.((((...((((((((..#)))))))))))))))).	1904	1921	1	-22.3	0	0.0288128	0.426	0	0	-15.4707	16	17	16	CDS
rno-miR-146a-5p	NM_139183	Crhbp	TGAGAACTGAATTCCATGGGTT#GACCCAGGAAAGGGACCCTAGCAGCTTCGAGTTCTCAG#(((((((((((((((.((((((#))))))))))...............))).)))))))).	5	43	1	-22.2	1	0.0280901	0.412	0.844705	0.255203	-4.17062	21	38	10	5UTR
rno-miR-146a-5p	XM_039098337	Mthfsd	TGAGAACTGAATTCCATGGGTT#GCCCTTCCAGAAGACCCGAGTTCAGTTCC#...(((((((((((...(((((#.)))))))))))))))).	3501	3530	1	-21	0	0.0279284	0.485	0	0	-7.48304	16	18	16	3UTR
rno-miR-146a-5p	XM_039098339	Mthfsd	TGAGAACTGAATTCCATGGGTT#GCCCTTCCAGAAGACCCGAGTTCAGTTCC#...(((((((((((...(((((#.)))))))))))))))).	3501	3530	1	-21	0	0.0279284	0.485	0	0	-7.48304	16	18	16	3UTR
rno-miR-146a-5p	XM_008764107	Ermap	TGAGAACTGAATTCCATGGGTT#GACAGAGGGGTAAACCCTCCATGGTTTTCTGTTTTCT#.((((((.(((..(((((((..#.)))))))..))).)))))).	2265	2302	1	-21.1	1	0.0275333	0.559	0	0	-10.7429	16	21	7	3UTR
rno-miR-146a-5p	XM_039111198	Ermap	TGAGAACTGAATTCCATGGGTT#GACAGAGGGGTAAACCCTCCATGGTTTTCTGTTTTCT#.((((((.(((..(((((((..#.)))))))..))).)))))).	2634	2671	1	-21.1	1	0.0275333	0.559	0	0	-10.7429	16	21	7	3UTR
rno-miR-146a-5p	NM_001105210	Irag1	TGAGAACTGAATTCCATGGGTT#ACCCATGTCATGCCAATCAATCGGTTCTCAC#((((((((((((..(((((((.#)))))))..)).........)))))))))).	3768	3799	1	-21	1	0.0274741	0.456	1.1062	1.70951	-6.08354	19	31	10	3UTR
rno-miR-146a-5p	NM_001107783	Kif16b	TGAGAACTGAATTCCATGGGTT#GCCTTACAGGGATTCAGTTTTGAC#(.(((((((((((((..((((.#))))....))))))))))))).).	979	1003	1	-20.5	1	0.027032	0.559	0.38354	0.503299	-5.3343	18	24	13	CDS
rno-miR-146a-5p	NM_001109384	Alkbh7	TGAGAACTGAATTCCATGGGTT#CCTAAGGGGTTCAGCCCGATATGACTTCTCC#.((((((((((((((.((((..#)))).)))))))))...........))))).	523	554	1	-19	1	0.0268179	0.574	1.04088	1.16635	-4.02637	18	31	9	CDS
rno-miR-146a-5p	NM_001106133	Dym	TGAGAACTGAATTCCATGGGTT#GACCCCTTCTGGAATCAGCTCTTCTCT#.((((((((.((((((.(((((#)))))....)))))))))...))))).	351	378	1	-18.9	1	0.026198	0.544	1.44499	1.39797	-5.03583	19	27	9	CDS
rno-miR-146a-5p	XM_017600880	Dym	TGAGAACTGAATTCCATGGGTT#GACCCCTTCTGGAATCAGCTCTTCTCT#.((((((((.((((((.(((((#)))))....)))))))))...))))).	417	444	1	-18.9	1	0.026198	0.544	0	0	-5.03583	19	27	9	CDS
rno-miR-146a-5p	XM_039096638	Dym	TGAGAACTGAATTCCATGGGTT#GACCCCTTCTGGAATCAGCTCTTCTCT#.((((((((.((((((.(((((#)))))....)))))))))...))))).	418	445	1	-18.9	1	0.026198	0.544	0	0	-5.03583	19	27	9	CDS
rno-miR-146a-5p	XM_008758909	Rsph6a	TGAGAACTGAATTCCATGGGTT#ACCCGTCAGGCCTTCCCATGGAGTTCTCAC#(((((((.....((((((((..#.))))))))))))))).	413	443	1	-21.8	1	0.0259853	0.456	0	0	-14.7217	15	17	15	CDS
rno-miR-146a-5p	XM_003751991	LOC100363372	TGAGAACTGAATTCCATGGGTT#AACCCATGGGGTGAAGTATTTAA#((((.(((..((((((((((((#))))))))))))..))).)))).	7256	7279	1	-22	0	0.0259773	0.632	0	0	-10.3555	19	23	12	3UTR
rno-miR-146a-5p	XM_039100626	LOC100363372	TGAGAACTGAATTCCATGGGTT#AACCCATGGGGTGAAGTATTTAA#((((.(((..((((((((((((#))))))))))))..))).)))).	7402	7425	1	-22	0	0.0259773	0.632	0	0	-10.3555	19	23	12	3UTR
rno-miR-146a-5p	XM_006252711	Zfp488	TGAGAACTGAATTCCATGGGTT#GACTCGTGGGAGCTCTCAGGACTCAT#((((..((((.(((((((((((#)))))))))))....))))..)))).	1175	1201	1	-22.1	0	0.0255578	0.426	0	0	-12.7823	19	26	11	CDS
rno-miR-146a-5p	XM_006241132	Pram1	TGAGAACTGAATTCCATGGGTT#TCCTGCAATTCAGTTTTCT#.((((((((((((.((.(((..#))))).)))))))))))).	1256	1275	1	-18.1	1	0.0254337	0.574	0	0	-4.65016	17	19	12	5UTR
rno-miR-146a-5p	NM_145777	Olfm3	TGAGAACTGAATTCCATGGGTT#ACTCAAGTCAGTTCTCAA#((((((((((....(.(((((.#))))).))))))))))).	2189	2207	1	-17.1	1	0.0252778	0.676	0.477835	0.879982	-12.4882	16	18	11	3UTR
rno-miR-146a-5p	XM_017590639	Olfm3	TGAGAACTGAATTCCATGGGTT#ACTCAAGTCAGTTCTCAA#((((((((((....(.(((((.#))))).))))))))))).	2406	2424	1	-17.1	1	0.0252778	0.676	0	0	-12.4882	16	18	11	3UTR
rno-miR-146a-5p	NM_001107408	Gins3	TGAGAACTGAATTCCATGGGTT#TCCAGAGAATTCAGATATCTCC#.((((.((((((((..((((..#))))..))))))))...)))).	425	447	1	-18.8	0	0.0250572	0.544	0.920092	0.142192	-6.66278	16	22	8	CDS
rno-miR-146a-5p	XM_008770470	Ccdc88a	TGAGAACTGAATTCCATGGGTT#AGCTCTAATAGCATGCCTCCTAGCTGGCCATGGAAATGTTTAGTTCA#...((((((((((((((((.(.#.).)))))))...))))))))).	7955	8002	1	-21.1	0	0.0250322	0.529	0	0	-6.51454	17	23	9	3UTR
rno-miR-146a-5p	XM_039092893	Ccdc88a	TGAGAACTGAATTCCATGGGTT#AGCATGCCTCCTAGCTGGCCATGGAAATGTTTAGTTCA#...((((((((((((((((.(.#.).)))))))...))))))))).	8244	8282	1	-21.1	0	0.0250322	0.529	0	0	-6.51454	17	23	9	3UTR
rno-miR-146a-5p	XM_006246176	Olr1386	TGAGAACTGAATTCCATGGGTT#TCCTGAGTTCAGTTCC#...(((((((((((...(((..#))).))))))))))).	1212	1228	1	-16.9	0	0.0249329	0.485	0	0	-7.48304	14	16	11	3UTR
rno-miR-146a-5p	NM_001192005	Cd209e	TGAGAACTGAATTCCATGGGTT#GACTGTGTGGAATTCAGA#......(((((((((((.((((#))))..))))))))))).	576	594	1	-18.2	0	0.0248528	0.588	0.151521	0.174222	-15.5666	15	18	11	CDS
rno-miR-146a-5p	XM_039089854	Zfp853	TGAGAACTGAATTCCATGGGTT#GCCTGTGGACATCAGATCTGAG#(.(((.((((..(((((((((.#)))))))))..)))).))).).	1854	1876	1	-20.6	0	0.0248444	0.426	0	0	-13.1738	17	22	9	CDS
rno-miR-146a-5p	XM_008773320	LOC684932	TGAGAACTGAATTCCATGGGTT#TCCGCTGGAGTTCAGATTTTAA#(((((.((((((((((((((..#)))).)))))))))).))))).	2188	2210	1	-20.4	0	0.0248143	0.574	0	0	-5.83853	19	22	10	CDS
rno-miR-146a-5p	NM_138540	Bub1b	TGAGAACTGAATTCCATGGGTT#CCCGTGGGATTTTTATATCAA#(((.....((((((((((((..#)))))))))))).....))).	2565	2586	1	-19.9	0	0.0247206	0.529	1.93506	0.829485	-16.8469	15	21	12	CDS
rno-miR-146a-5p	NM_001107167	Serpinb11	TGAGAACTGAATTCCATGGGTT#GCCTATGGATTTCAGCTCAA#((((..(((((.(((((((((.#))))))))).))))))))).	1786	1806	1	-23.7	0	0.0245523	0.721	0.433333	0.3009	-13.3044	18	20	9	3UTR
rno-miR-146a-5p	XM_039080494	LOC691764	TGAGAACTGAATTCCATGGGTT#GCCCAGTGGATGTCAGTTTCTTAT#((((((((((..(((((((((.#))))).))))..)))))).)))).	1550	1574	1	-23.5	1	0.0245484	0.632	0	0	-10.1092	19	24	6	5UTR
rno-miR-146a-5p	XM_008763759	Ambp	TGAGAACTGAATTCCATGGGTT#GGCCCGGATCTATGGAAAATGGTTCA#...(((((...(((((((((((#.)))))))))))...))))).	204	230	1	-18.6	0	0.0245053	0.426	0	0	-11.6382	16	21	11	CDS
rno-miR-146a-5p	XM_008763239	Atg7	TGAGAACTGAATTCCATGGGTT#CCCAAATAATTCAGTTCTG#..(((((((((((...((((..#))))...))))))))))).	6489	6508	1	-19.6	1	0.0244169	0.559	0	0	-6.78234	15	19	11	3UTR
rno-miR-146a-5p	NM_001025669	Brox	TGAGAACTGAATTCCATGGGTT#TCCATGGGATTTAA#.......(((((((((((((..#))))))))))))).	415	429	1	-17	0	0.024303	0.603	0.0478963	0.2591	-17.1102	13	14	13	CDS
rno-miR-146a-5p	XM_006231684	Sfxn4	TGAGAACTGAATTCCATGGGTT#GACGCATGGAATAAGAGTCTTTCAA#((((((((..((((((((.(((#))).))))))))...))).))))).	1239	1264	1	-18.9	1	0.0238625	0.544	0	0	-6.23647	19	25	8	CDS
rno-miR-146a-5p	XM_039084758	Sfxn4	TGAGAACTGAATTCCATGGGTT#GACGCATGGAATAAGAGTCTTTCAA#((((((((..((((((((.(((#))).))))))))...))).))))).	366	391	1	-18.9	1	0.0238625	0.544	0	0	-6.23647	19	25	8	CDS
rno-miR-146a-5p	NM_022961	Vps33a	TGAGAACTGAATTCCATGGGTT#ATCCATGGAGTCAGA#......(((.(((((((((((.#)))))))))))))).	471	486	1	-18.6	0	0.023757	0.544	1.62873	1.94269	-16.8091	14	15	14	CDS
rno-miR-146a-5p	XM_340803	Sap30l	TGAGAACTGAATTCCATGGGTT#AGCCTTGACTTAACTGGCCCTGTGGAAATGTCAGTGTCTTAT#((((((((((.(((((((((((#.))))).))))))...))))).))))).	2507	2549	1	-22	1	0.0237212	0.632	0	0	-6.76235	21	28	6	3UTR
rno-miR-146a-5p	NM_001107831	Uck1	TGAGAACTGAATTCCATGGGTT#CCCATGGGATGGCGTGTTTTGGA#(.(((((((.((((((((((..#))))))))))..)).))))).).	1703	1726	1	-19.4	1	0.023528	0.515	1.93839	1.48673	-6.34376	18	23	10	3UTR
rno-miR-146a-5p	XM_039110245	Fktn	TGAGAACTGAATTCCATGGGTT#GACTCATGGGCCATCTAATCAGTTCTG#..((((((((..((((((((((#))))))))))........)))))))).	2050	2077	1	-20.6	1	0.0231574	0.588	0	0	-11.1286	18	27	10	3UTR
rno-miR-146a-5p	NM_001013246	Arhgef12	TGAGAACTGAATTCCATGGGTT#AACTCCAAGGAGACTCGGCGGGTCTTCCTGGAGTTTCATCAGTTCTTC#.(((((((((((((((.(((..#.)))))))))....))))))))).	1239	1287	1	-19.8	1	0.0227851	0.471	2.33746	2.05017	-3.79332	18	24	9	CDS
rno-miR-146a-5p	XM_006254968	St8sia5	TGAGAACTGAATTCCATGGGTT#AACCCATGGAAAGTCAGAGCTA#..((..((((.(((((((((((#)))))))))))..))))..)).	2861	2883	1	-22.5	0	0.0223085	0.544	0	0	-13.8018	17	22	11	3UTR
rno-miR-146a-5p	NM_001033889	Cog7	TGAGAACTGAATTCCATGGGTT#TCCGTGGATCAGTCTA#..((.(((((..((((((((..#))))))))))))))).	704	720	1	-17.7	0	0.0223058	0.544	2.07346	1.89211	-15.2476	15	16	15	CDS
rno-miR-146a-5p	NM_001191653	Tanc2	TGAGAACTGAATTCCATGGGTT#CCATGGCAGTCTCAA#((((.((((....((((((...#)))))))))))))).	915	930	1	-17.4	0	0.022228	0.515	2.06388	1.82325	-16.7598	14	15	14	CDS
rno-miR-146a-5p	NM_001004082	Hsp90ab1	TGAGAACTGAATTCCATGGGTT#GGCAGTTGGAATTCAGGGCA#...(..((((((((((...(((#)))...))))))))))..).	1018	1038	1	-17.8	0	0.0220426	0.471	2.3289	2.30278	-12.5345	14	20	10	CDS
rno-miR-146a-5p	XM_039094937	Vps51	TGAGAACTGAATTCCATGGGTT#AGCCCTGTGGAATTCAA#.......(((((((((((((((#))))).)))))))))).	1849	1866	1	-19.8	0	0.0220132	0.544	0	0	-17.1102	15	17	10	CDS
rno-miR-146a-5p	XM_039079789	Septin3	TGAGAACTGAATTCCATGGGTT#AGCCGTGGATTCAGTTGTG#..(.(((((((.(((((((.(.#).)))))))))))))).).	1351	1370	1	-20.1	0	0.0219658	0.471	0	0	-11.3358	16	19	14	CDS
rno-miR-146a-5p	XM_006252312	Lrch1	TGAGAACTGAATTCCATGGGTT#GACAACATGGAGTTCGGTA#.....(((((((((((((.(((#)))..))))))))))))).	4352	4371	1	-20.3	0	0.0219287	0.735	0	0	-13.6656	16	19	13	3UTR
rno-miR-146a-5p	XM_006252315	Lrch1	TGAGAACTGAATTCCATGGGTT#GACAACATGGAGTTCGGTA#.....(((((((((((((.(((#)))..))))))))))))).	4328	4347	1	-20.3	0	0.0219287	0.735	0	0	-13.6656	16	19	13	3UTR
rno-miR-146a-5p	XM_017590158	Lysmd4	TGAGAACTGAATTCCATGGGTT#GGCCCAGGAAGACAGTCTCAA#((((.((((..((((.((((((#))))))))))..)))))))).	653	674	1	-23	0	0.0217788	0.412	0	0	-12.3569	18	21	10	CDS
rno-miR-146a-5p	NM_001108501	Ccp110	TGAGAACTGAATTCCATGGGTT#GACAAACCGTAAAAGACACCATGGAATTTATACGAAGTTTTCAG#((((((((((((((((((((((#.))).)))))))))))......)))))))).	2748	2792	1	-23.7	1	0.021719	0.559	1.73252	1.68007	-3.93757	22	31	11	CDS
rno-miR-146a-5p	XM_039082806	Ccp110	TGAGAACTGAATTCCATGGGTT#GACAAACCGTAAAAGACACCATGGAATTTATACGAAGTTTTCAG#((((((((((((((((((((((#.))).)))))))))))......)))))))).	2828	2872	1	-23.7	1	0.021719	0.559	0	0	-3.93757	22	31	11	CDS
rno-miR-146a-5p	XM_039082822	Ccp110	TGAGAACTGAATTCCATGGGTT#GACAAACCGTAAAAGACACCATGGAATTTATACGAAGTTTTCAG#((((((((((((((((((((((#.))).)))))))))))......)))))))).	2828	2872	1	-23.7	1	0.021719	0.559	0	0	-3.93757	22	31	11	CDS
rno-miR-146a-5p	XM_039082825	Ccp110	TGAGAACTGAATTCCATGGGTT#GACAAACCGTAAAAGACACCATGGAATTTATACGAAGTTTTCAG#((((((((((((((((((((((#.))).)))))))))))......)))))))).	2828	2872	1	-23.7	1	0.021719	0.559	0	0	-3.93757	22	31	11	CDS
rno-miR-146a-5p	XM_039108509	Vom1r69	TGAGAACTGAATTCCATGGGTT#ACCCATGGACCCGATCTCC#.((((.(.(...(((((((((.#))))))))).).).)))).	107	126	1	-18.3	0	0.0216385	0.515	0	0	-15.422	15	19	9	CDS
rno-miR-146a-5p	XM_039080057	LOC691422	TGAGAACTGAATTCCATGGGTT#TGGAATTCAGTTTTTG#.(((((((((((((((......#))))))))))))))).	9053	9069	1	-19.9	1	0.0216246	0.559	0	0	-3.79332	15	16	15	3UTR
rno-miR-146a-5p	NM_001126266	Utp23	TGAGAACTGAATTCCATGGGTT#AATCCTGGAATTCCTCTCAT#(((((...((((((((.(((((#))))))))))))).))))).	471	491	1	-20	0	0.0212409	0.632	1.63014	1.80762	-9.69585	18	20	13	CDS
rno-miR-146a-5p	XM_006241920	LOC102555083	TGAGAACTGAATTCCATGGGTT#GACCTCTGGAAGAAGTTACAGTTCTTAA#((((((((((((((((.(((((#))))).))))....))).))))))))).	1399	1427	1	-20.9	1	0.0211972	0.5	0	0	-3.93757	21	28	9	5UTR
rno-miR-146a-5p	NM_012550	Ednra	TGAGAACTGAATTCCATGGGTT#ACCCACTTTGGTCAGTTCTTAC#((((((((((...((((((((.#)))))...))))))))))))).	3715	3737	1	-20.4	1	0.0211444	0.603	0.311325	0.230439	-11.3983	18	22	13	3UTR
rno-miR-146a-5p	XM_233485	Rlf	TGAGAACTGAATTCCATGGGTT#GGCCCGTGGTTGTCCTTGAAAGATCTAAGTTCTCT#.(((((((((...(((((((((#)))))))))...)).............))))))).	5695	5730	1	-21.9	1	0.0210706	0.574	0	0	-11.254	18	35	9	CDS
rno-miR-146a-5p	XM_006251179	Gck	TGAGAACTGAATTCCATGGGTT#GCCCAATGGATTCAGCAAACACCTACCTGTCTCC#.((((.(((((.(((((((((.#))))).)))))))))..............)))).	306	340	1	-17.7	0	0.0210198	0.485	0	0	-9.04109	18	34	9	5UTR
rno-miR-146a-5p	XM_006241591	Rims2	TGAGAACTGAATTCCATGGGTT#AAGCCATGGAGTAATCTCAGAATCAG#(((...(((((((((((((.((#)).)))))))))....))))..))).	4974	5000	1	-18.6	0	0.0209746	0.588	0	0	-12.9896	18	26	9	3UTR
rno-miR-146a-5p	XM_006241592	Rims2	TGAGAACTGAATTCCATGGGTT#AAGCCATGGAGTAATCTCAGAATCAG#(((...(((((((((((((.((#)).)))))))))....))))..))).	4908	4934	1	-18.6	0	0.0209746	0.588	0	0	-12.9896	18	26	9	3UTR
rno-miR-146a-5p	XM_008765447	Rims2	TGAGAACTGAATTCCATGGGTT#AAGCCATGGAGTAATCTCAGAATCAG#(((...(((((((((((((.((#)).)))))))))....))))..))).	4848	4874	1	-18.6	0	0.0209746	0.588	0	0	-12.9896	18	26	9	3UTR
rno-miR-146a-5p	NM_053328	Bhlhe40	TGAGAACTGAATTCCATGGGTT#AACCCGTGGACTTCAA#.......((((.((((((((((#)))))))))).)))).	908	924	1	-19.7	0	0.0208881	0.471	0.924268	1.00652	-20.457	14	16	10	CDS
rno-miR-146a-5p	XM_006246277	Rapgef6	TGAGAACTGAATTCCATGGGTT#GACCCTGCGACAGTTCTCAT#(((((((((...((((.(((((#))))))).))))))))))).	95	115	1	-20.5	1	0.0203703	0.412	0	0	-11.3517	18	20	11	5UTR
rno-miR-146a-5p	XM_006246278	Rapgef6	TGAGAACTGAATTCCATGGGTT#GACCCTGCGACAGTTCTCAT#(((((((((...((((.(((((#))))))).))))))))))).	95	115	1	-20.5	1	0.0203703	0.412	0	0	-11.3517	18	20	11	5UTR
rno-miR-146a-5p	NM_001013044	Cryzl1	TGAGAACTGAATTCCATGGGTT#TCCATGGAAGTTGTTCA#...((((....(((((((((..#)))))))))...)))).	1027	1044	1	-17.9	0	0.0202501	0.618	1.54667	1.82027	-13.9518	13	17	9	CDS
rno-miR-146a-5p	XM_039088339	Sema5b	TGAGAACTGAATTCCATGGGTT#CCCATGGAATTCAA#.......(((((((((((((..#))))))))))))).	3599	3613	1	-22	0	0.0202437	0.559	0	0	-17.1102	13	14	13	CDS
rno-miR-146a-5p	XM_039092858	Abca13	TGAGAACTGAATTCCATGGGTT#GGCCCAGAATTCCAGGACTCAT#((((..((((((((..((((((#)))))))))))).))..)))).	13538	13560	1	-19.1	0	0.0202048	0.515	0	0	-10.9261	18	22	12	CDS
rno-miR-146a-5p	XM_017596433	Paqr8	TGAGAACTGAATTCCATGGGTT#CCATGGCTCTAAAGTTCTTC#.(((((((.....((((((...#))))))......))))))).	2602	2622	1	-17.2	1	0.0201404	0.588	0	0	-13.5529	13	20	7	3UTR
rno-miR-146a-5p	XM_017596434	Paqr8	TGAGAACTGAATTCCATGGGTT#CCATGGCTCTAAAGTTCTTC#.(((((((.....((((((...#))))))......))))))).	2686	2706	1	-17.2	1	0.0201404	0.588	0	0	-13.5529	13	20	7	3UTR
rno-miR-146a-5p	XM_039083545	Paqr8	TGAGAACTGAATTCCATGGGTT#CCATGGCTCTAAAGTTCTTC#.(((((((.....((((((...#))))))......))))))).	2803	2823	1	-17.2	1	0.0201404	0.588	0	0	-13.5529	13	20	7	3UTR
rno-miR-146a-5p	XM_017593706	Klhl32	TGAGAACTGAATTCCATGGGTT#GCCCATGGCATCAGTTTTCT#.(((((((((...((((((((.#))))))))..))))))))).	2570	2590	1	-25.1	1	0.0200844	0.485	0	0	-11.254	17	20	9	3UTR
rno-miR-146a-5p	XM_232840	Klhl32	TGAGAACTGAATTCCATGGGTT#GCCCATGGCATCAGTTTTCT#.(((((((((...((((((((.#))))))))..))))))))).	2669	2689	1	-25.1	1	0.0200844	0.485	0	0	-11.254	17	20	9	3UTR
rno-miR-146a-5p	XM_039090899	Uchl5	TGAGAACTGAATTCCATGGGTT#AACCCATGGATACAGATCA#...((.(((...((((((((((#))))))))))..))).)).	862	881	1	-20	0	0.0200375	0.529	0	0	-15.8296	15	19	10	CDS
rno-miR-146a-5p	NM_001134961	Pdxdc1	TGAGAACTGAATTCCATGGGTT#GGAATTCAGGAGGCTCAG#((((..(((((((((.......#)))))))))....)))).	2014	2032	1	-18.3	0	0.0200063	0.5	1.08808	1.15083	-10.1906	13	18	9	CDS
rno-miR-146a-5p	XM_039086236	Pdxdc1	TGAGAACTGAATTCCATGGGTT#GGAATTCAGGAGGCTCAG#((((..(((((((((.......#)))))))))....)))).	1848	1866	1	-18.3	0	0.0200063	0.5	0	0	-10.1906	13	18	9	CDS
rno-miR-146a-5p	XM_039086238	Pdxdc1	TGAGAACTGAATTCCATGGGTT#GGAATTCAGGAGGCTCAG#((((..(((((((((.......#)))))))))....)))).	1984	2002	1	-18.3	0	0.0200063	0.5	0	0	-10.1906	13	18	9	CDS
rno-miR-146a-5p	NM_001000434	Olr1169	TGAGAACTGAATTCCATGGGTT#ACCTTGGAATTCCTTCTCC#.(((((..((((((((.((((.#)))))))))))).))))).	24	43	1	-18.6	0	0.0199615	0.559	0.789816	0.109606	-7.65065	17	19	12	CDS
rno-miR-146a-5p	XM_006228948	Siglec10	TGAGAACTGAATTCCATGGGTT#AGCCTATGGAAGAGTTCA#...(((((...(((((((((((#))))))))))).))))).	2814	2832	1	-20.1	0	0.0199034	0.515	0	0	-11.6382	16	18	11	3UTR
rno-miR-146a-5p	XM_017590855	Ccdc39	TGAGAACTGAATTCCATGGGTT#GATCCTGGAGGACCAGTTAGCAA#((..(((((..(((((.(((((#))))))))))...)))))..)).	199	222	1	-17.3	0	0.019872	0.603	0	0	-12.5944	17	23	10	CDS
rno-miR-146a-5p	NM_001037511	Defb40	TGAGAACTGAATTCCATGGGTT#GCCCGTGGTTTTTCGTTCTA#..(((((.(((..((((((((.#))))))))..))).))))).	121	141	1	-22	0	0.0198375	0.544	0	0	-11.9066	16	20	8	CDS
rno-miR-146a-5p	XM_017594729	Ano4	TGAGAACTGAATTCCATGGGTT#TCCATGGAATTTTCAACCTCT#.(((....((((((((((((..#)))))))))))).....))).	54	75	1	-18.6	0	0.0198222	0.632	0	0	-13.6706	15	21	12	5UTR
rno-miR-146a-5p	NM_012584	Hsd3b5	TGAGAACTGAATTCCATGGGTT#ATCCAAGGACAGTTCTA#..(((((((...(((.(((((.#))))).)))))))))).	828	845	1	-17	1	0.0198186	0.515	0.57288	0.999372	-12.6041	15	17	10	CDS
rno-miR-146a-5p	XM_006239622	Strn	TGAGAACTGAATTCCATGGGTT#GCTTGTGGAATTTAGA#......(((((((((((((((.#))))))))))))))).	2427	2443	1	-17.9	0	0.0195826	0.574	0	0	-15.5666	15	16	15	CDS
rno-miR-146a-5p	XM_006237986	Rars2	TGAGAACTGAATTCCATGGGTT#CCCAGGTTTTTAGTTCTTG#.((((((((((..((.((((..#))))))..)))))))))).	5978	5997	1	-21.3	1	0.0193349	0.676	0	0	-8.66231	16	19	10	3UTR
rno-miR-146a-5p	NM_001013894	Lilrb4	TGAGAACTGAATTCCATGGGTT#CCCATGGAATTGTGTA#.....((..(((((((((((..#)))))))))))..)).	889	905	1	-18.8	0	0.0192373	0.471	-0.0787292	-0.148366	-17.0356	13	16	11	CDS
rno-miR-146a-5p	XM_006228238	Lilrb4	TGAGAACTGAATTCCATGGGTT#CCCATGGAATTGTGTA#.....((..(((((((((((..#)))))))))))..)).	1082	1098	1	-18.8	0	0.0192373	0.471	0	0	-17.0356	13	16	11	CDS
rno-miR-146a-5p	XM_017588891	Lilrb4	TGAGAACTGAATTCCATGGGTT#CCCATGGAATTGTGTA#.....((..(((((((((((..#)))))))))))..)).	968	984	1	-18.8	0	0.0192373	0.471	0	0	-17.0356	13	16	11	CDS
rno-miR-146a-5p	XM_039103861	Lilrb4	TGAGAACTGAATTCCATGGGTT#CCCATGGAATTGTGTA#.....((..(((((((((((..#)))))))))))..)).	851	867	1	-18.8	0	0.0192373	0.471	0	0	-17.0356	13	16	11	CDS
rno-miR-146a-5p	XM_039103868	Lilrb4	TGAGAACTGAATTCCATGGGTT#CCCATGGAATTGTGTA#.....((..(((((((((((..#)))))))))))..)).	566	582	1	-18.8	0	0.0192373	0.471	0	0	-17.0356	13	16	11	CDS
rno-miR-146a-5p	NM_001105937	Sgsm1	TGAGAACTGAATTCCATGGGTT#GCCCAAGGAGTTCTCTTTTTAA#((((((..(((((((.(((((.#))))).)))))))..)))))).	5017	5039	1	-20.9	0	0.0191762	0.515	0.301144	0.398069	-8.02794	18	22	7	3UTR
rno-miR-146a-5p	NM_001271104	Foxp2	TGAGAACTGAATTCCATGGGTT#AGCCCATGGTATTTATTTTCAG#((((((.(((((.(((((((((#))))))))).))))))))))).	4318	4340	1	-21.7	0	0.0191212	0.676	1.72703	2.51701	-6.77039	20	22	11	3UTR
rno-miR-146a-5p	XM_008762718	Foxp2	TGAGAACTGAATTCCATGGGTT#AGCCCATGGTATTTATTTTCAG#((((((.(((((.(((((((((#))))))))).))))))))))).	4400	4422	1	-21.7	0	0.0191212	0.676	0	0	-6.77039	20	22	11	3UTR
rno-miR-146a-5p	NM_001136096	Itsn1	TGAGAACTGAATTCCATGGGTT#AACCCTAAGTGGAATTCTAACTGCCAGTTCTTC#.(((((((((((((((((((((#)))))...)))))))))........))))))).	5158	5191	1	-21.7	1	0.0187018	0.515	1.9003	1.66389	-3.79332	21	33	9	CDS
rno-miR-146a-5p	XM_039086660	Acox1	TGAGAACTGAATTCCATGGGTT#GACCCCAAGACCCAAGAGTTCATTCTCAA#((((((.(((((((..((((((#.)))))).))))))))))))).	554	583	1	-22.2	0	0.0181253	0.529	0	0	-6.44976	19	22	13	CDS
rno-miR-146a-5p	XM_039086661	Acox1	TGAGAACTGAATTCCATGGGTT#GACCCCAAGACCCAAGAGTTCATTCTCAA#((((((.(((((((..((((((#.)))))).))))))))))))).	664	693	1	-22.2	0	0.0181253	0.529	0	0	-6.44976	19	22	13	CDS
rno-miR-146a-5p	NM_019370	Enpp3	TGAGAACTGAATTCCATGGGTT#GCCCATGTGGAGTTCATACACCGTTCCCAA#((.((((((((((((((((((.#)))))..)))))))))......)))).)).	1975	2005	1	-20.8	0	0.0181176	0.485	1.45883	1.1785	-5.49511	20	30	9	CDS
rno-miR-146a-5p	NM_001107216	Arap2	TGAGAACTGAATTCCATGGGTT#TCCAGGAATTTGGTTTTTAT#(((((((((((((((.((((..#))))))))))))))))))).	287	307	1	-20.3	1	0.0180583	0.647	0.832027	1.01277	-4.17062	19	20	19	CDS
rno-miR-146a-5p	XM_039091930	Arap2	TGAGAACTGAATTCCATGGGTT#TCCAGGAATTTGGTTTTTAT#(((((((((((((((.((((..#))))))))))))))))))).	497	517	1	-20.3	1	0.0180583	0.647	0	0	-4.17062	19	20	19	CDS
rno-miR-146a-5p	XM_039111774	Cad	TGAGAACTGAATTCCATGGGTT#GGCTCTGGAGTCGTGGGAGTAAAGGTACCTCAGTTCTCC#.(((((((((((((((.(((((#)))))))))))..................))))))))).	4035	4074	1	-21	1	0.0180357	0.412	0	0	-3.79332	20	39	11	CDS
rno-miR-146a-5p	NM_017340	Acox1	TGAGAACTGAATTCCATGGGTT#GACCCCAAGACCCAAGAGTTCATTCTCAA#((((((.(((((((..((((((#.)))))).))))))))))))).	558	587	1	-22.2	0	0.0178727	0.529	2.08456	1.6889	-6.44976	19	22	13	CDS
rno-miR-146a-5p	XM_039090569	Tlr5	TGAGAACTGAATTCCATGGGTT#ACCCTATTCGGTTCTCC#.(((((((((((.....((((.#)))).))))))))))).	2980	2997	1	-17.9	1	0.0178321	0.544	0	0	-6.90779	15	17	11	CDS
rno-miR-146a-5p	XM_039090570	Tlr5	TGAGAACTGAATTCCATGGGTT#ACCCTATTCGGTTCTCC#.(((((((((((.....((((.#)))).))))))))))).	2988	3005	1	-17.9	1	0.0178321	0.544	0	0	-6.90779	15	17	11	CDS
rno-miR-146a-5p	XM_039090571	Tlr5	TGAGAACTGAATTCCATGGGTT#ACCCTATTCGGTTCTCC#.(((((((((((.....((((.#)))).))))))))))).	2364	2381	1	-17.9	1	0.0178321	0.544	0	0	-6.90779	15	17	11	CDS
rno-miR-146a-5p	XM_039108698	Dtx4	TGAGAACTGAATTCCATGGGTT#ACCCATGGATAGACCTCAC#((((..(((...(((((((((.#))))))))))))..)))).	1234	1253	1	-19.6	0	0.0177782	0.529	0	0	-17.3717	16	19	12	CDS
rno-miR-146a-5p	XM_017592658	Lrp6	TGAGAACTGAATTCCATGGGTT#ATACCATGGAGTTTGGCTATTCTTC#.((((((((((((((((((..(#)..)))))))))))))...))))).	4569	4594	1	-19.7	1	0.0175168	0.544	0	0	-3.79332	19	25	13	CDS
rno-miR-146a-5p	XM_008764749	Dpf3	TGAGAACTGAATTCCATGGGTT#AGCCCTGGAATGAGCAGTAATCAC#(((..((((.((((((.(((((#)))))))))))...))))..))).	3691	3715	1	-19.6	0	0.0174934	0.515	0	0	-12.3311	18	24	11	3UTR
rno-miR-146a-5p	NM_001170346	Neil3	TGAGAACTGAATTCCATGGGTT#GGCCCATCACCTTGTGAAGATGACCCGGGATTTCAGCATTCTCT#.((((((((((.(((.((((((#.))))))))).)))))..))))).	763	807	1	-23.1	1	0.0173871	0.5	2.2346	1.37708	-7.37318	19	24	9	CDS
rno-miR-146a-5p	XM_039111233	Maneal	TGAGAACTGAATTCCATGGGTT#GCTCTTTACAGCTACACCCAGGCCTGGGAGTTCAGCTATTTTCTCC#.((((((((((((((..(((((#.))))).))))))))).....))))).	2059	2105	1	-21.5	1	0.0173335	0.5	0	0	-4.02637	19	27	9	3UTR
rno-miR-146a-5p	XM_039112148	Eml4	TGAGAACTGAATTCCATGGGTT#GTGGGATTCAGTAAGTCTTT#.((((((((((((((((.....#))))))))))))...)))).	1301	1321	1	-18.1	1	0.0172177	0.515	0	0	-3.79332	16	20	12	CDS
rno-miR-146a-5p	XM_039112149	Eml4	TGAGAACTGAATTCCATGGGTT#GTGGGATTCAGTAAGTCTTT#.((((((((((((((((.....#))))))))))))...)))).	1268	1288	1	-18.1	1	0.0172177	0.515	0	0	-3.79332	16	20	12	CDS
rno-miR-146a-5p	XM_039112150	Eml4	TGAGAACTGAATTCCATGGGTT#GTGGGATTCAGTAAGTCTTT#.((((((((((((((((.....#))))))))))))...)))).	1127	1147	1	-18.1	1	0.0172177	0.515	0	0	-3.79332	16	20	12	CDS
rno-miR-146a-5p	XM_039112152	Eml4	TGAGAACTGAATTCCATGGGTT#GTGGGATTCAGTAAGTCTTT#.((((((((((((((((.....#))))))))))))...)))).	997	1017	1	-18.1	1	0.0172177	0.515	0	0	-3.79332	16	20	12	CDS
rno-miR-146a-5p	NM_012568	Glra2	TGAGAACTGAATTCCATGGGTT#ACCCAGAGTTCAGGTTCCAG#((.(((((((((((..(((((.#))))))))))))).))))).	1445	1465	1	-18.6	0	0.0171909	0.5	1.53058	1.52275	-6.46361	18	20	13	CDS
rno-miR-146a-5p	XM_008761391	Amigo1	TGAGAACTGAATTCCATGGGTT#ACCAGGACATTTAACTGATTTCTCTCCTCGTGGTTTCAGTTCTTAT#(((((((((((..(((((((..#.))))))).))))))))))).	4538	4584	1	-24	1	0.0171239	0.559	0	0	-8.57351	18	21	11	3UTR
rno-miR-146a-5p	NM_001001355	Olr905	TGAGAACTGAATTCCATGGGTT#GGCCCAGTTATATTTCTTCCTTTCCCTGGGAGTGTCTGAGTTCTTT#.(((((((..(((((..(((..#.)))..))))).....))))))).	287	333	1	-19.1	1	0.0170952	0.603	0.439449	0.248751	-6.32527	15	24	7	CDS
rno-miR-146a-5p	XM_008773620	Atp2b3	TGAGAACTGAATTCCATGGGTT#CCCATCTTCTGTACCATTGTCCTGGGCACCTTTGGAATTCAGATTGTCAT#(((.((((((((((((.((((.#.)))).)))))))))).)).))).	3399	3449	1	-23.9	0	0.0170245	0.529	0	0	-6.9696	19	24	10	CDS
rno-miR-146a-5p	XM_039099542	Atp2b3	TGAGAACTGAATTCCATGGGTT#CCCATCTTCTGTACCATTGTCCTGGGCACCTTTGGAATTCAGATTGTCAT#(((.((((((((((((.((((.#.)))).)))))))))).)).))).	3687	3737	1	-23.9	0	0.0170245	0.529	0	0	-6.9696	19	24	10	CDS
rno-miR-146a-5p	XM_039099544	Atp2b3	TGAGAACTGAATTCCATGGGTT#CCCATCTTCTGTACCATTGTCCTGGGCACCTTTGGAATTCAGATTGTCAT#(((.((((((((((((.((((.#.)))).)))))))))).)).))).	3009	3059	1	-23.9	0	0.0170245	0.529	0	0	-6.9696	19	24	10	CDS
rno-miR-146a-5p	XM_039099547	Atp2b3	TGAGAACTGAATTCCATGGGTT#CCCATCTTCTGTACCATTGTCCTGGGCACCTTTGGAATTCAGATTGTCAT#(((.((((((((((((.((((.#.)))).)))))))))).)).))).	3686	3736	1	-23.9	0	0.0170245	0.529	0	0	-6.9696	19	24	10	CDS
rno-miR-146a-5p	NM_001033968	Bag6	TGAGAACTGAATTCCATGGGTT#AGCCCATGGAGTCAGA#......(((.((((((((((((#))))))))))))))).	776	792	1	-22	0	0.0168992	0.456	1.47544	0.481031	-16.8091	15	16	15	CDS
rno-miR-146a-5p	NM_053609	Bag6	TGAGAACTGAATTCCATGGGTT#AGCCCATGGAGTCAGA#......(((.((((((((((((#))))))))))))))).	934	950	1	-22	0	0.0168992	0.456	1.47544	0.481031	-16.8091	15	16	15	CDS
rno-miR-146a-5p	XM_006256082	Bag6	TGAGAACTGAATTCCATGGGTT#AGCCCATGGAGTCAGA#......(((.((((((((((((#))))))))))))))).	838	854	1	-22	0	0.0168992	0.456	0	0	-16.8091	15	16	15	CDS
rno-miR-146a-5p	XM_006256087	Bag6	TGAGAACTGAATTCCATGGGTT#AGCCCATGGAGTCAGA#......(((.((((((((((((#))))))))))))))).	979	995	1	-22	0	0.0168992	0.456	0	0	-16.8091	15	16	15	CDS
rno-miR-146a-5p	NM_001127639	Gba	TGAGAACTGAATTCCATGGGTT#CCCATGATCTAGGGCCAGCCCTTGCCAACAGTTCTCAT#(((((((((.....((.(((((#.))))).))....))))))))).	982	1020	1	-20.1	1	0.0167555	0.515	0.760122	0.877314	-13.4976	16	23	9	CDS
rno-miR-146a-5p	NM_001173507	Stag2	TGAGAACTGAATTCCATGGGTT#GATCCTGCTTCAATTATGGATGAATCAGTTCTTG#.(((((((((..(((((((...#.)))))))....))))))))).	4101	4135	1	-18.2	1	0.0166779	0.632	2.46932	1.98009	-9.9649	16	22	9	CDS
rno-miR-146a-5p	XM_006252400	Lmo7	TGAGAACTGAATTCCATGGGTT#AGTCATGGAGCACAAGAGGAGAGTCAACTCGGATTTCAGCTTCTCT#.((((((((((.(((..(((((#.)))))))).))))).))))).	1860	1906	1	-19	1	0.0165989	0.529	0	0	-7.37318	18	22	8	CDS
rno-miR-146a-5p	XM_006252401	Lmo7	TGAGAACTGAATTCCATGGGTT#AGTCATGGAGCACAAGAGGAGAGTCAACTCGGATTTCAGCTTCTCT#.((((((((((.(((..(((((#.)))))))).))))).))))).	1887	1933	1	-19	1	0.0165989	0.529	0	0	-7.37318	18	22	8	CDS
rno-miR-146a-5p	NM_001001515	Lmo7	TGAGAACTGAATTCCATGGGTT#AACTCGGATTTCAGCTTCTCT#.((((((((((.(((..(((((#)))))))).))))).))))).	2747	2768	1	-18.7	1	0.0165989	0.529	1.6036	1.08557	-7.37318	18	21	8	CDS
rno-miR-146a-5p	XM_039093528	Lmo7	TGAGAACTGAATTCCATGGGTT#AACTCGGATTTCAGCTTCTCT#.((((((((((.(((..(((((#)))))))).))))).))))).	2921	2942	1	-18.7	1	0.0165989	0.529	0	0	-7.37318	18	21	8	CDS
rno-miR-146a-5p	NM_001346427	LOC682870	TGAGAACTGAATTCCATGGGTT#AATCCCCAGCCCCAAGGAATTCATTCTTAA#((((((.((((((((.((((..#.)))).)))))))))))))).	1681	1711	1	-22.8	0	0.0165641	0.676	0	0	-5.71431	18	21	14	3UTR
rno-miR-146a-5p	NM_133554	Slc17a1	TGAGAACTGAATTCCATGGGTT#GGCCCATGGTTTTCTACATCTTT#.((((...(((..(((((((((#)))))))))..)))....)))).	730	753	1	-19.9	0	0.0165593	0.574	0	0	-14.1875	16	23	9	CDS
rno-miR-146a-5p	NM_001108848	Elavl1	TGAGAACTGAATTCCATGGGTT#GACGTTTGGGGTTCTGTTCTG#..(((((.((((((((.(.(((#))).).)))))))).))))).	2335	2356	1	-18.7	0	0.0164994	0.662	1.6382	1.91889	-7.27064	17	21	8	3UTR
rno-miR-146a-5p	NM_001107481	Pnma8b	TGAGAACTGAATTCCATGGGTT#GGCCCATGGATGACTTCAGA#......(((((.((((((((((#))))))))))....))))).	690	710	1	-19.4	0	0.0164954	0.471	-0.571655	0.262908	-18.9134	15	20	10	CDS
rno-miR-146a-5p	XM_006246827	Gas7	TGAGAACTGAATTCCATGGGTT#GGCCCGTTTGAGTTCTCAG#((((((((.((....(((((((#))))))))).)))))))).	3846	3865	1	-19.3	1	0.016449	0.441	0	0	-11.2222	17	19	9	3UTR
rno-miR-146a-5p	XM_006246828	Gas7	TGAGAACTGAATTCCATGGGTT#GGCCCGTTTGAGTTCTCAG#((((((((.((....(((((((#))))))))).)))))))).	3308	3327	1	-19.3	1	0.016449	0.441	0	0	-11.2222	17	19	9	3UTR
rno-miR-146a-5p	XM_006246829	Gas7	TGAGAACTGAATTCCATGGGTT#GGCCCGTTTGAGTTCTCAG#((((((((.((....(((((((#))))))))).)))))))).	3411	3430	1	-19.3	1	0.016449	0.441	0	0	-11.2222	17	19	9	3UTR
rno-miR-146a-5p	XM_006246830	Gas7	TGAGAACTGAATTCCATGGGTT#GGCCCGTTTGAGTTCTCAG#((((((((.((....(((((((#))))))))).)))))))).	3373	3392	1	-19.3	1	0.016449	0.441	0	0	-11.2222	17	19	9	3UTR
rno-miR-146a-5p	NM_001108198	Guca1b	TGAGAACTGAATTCCATGGGTT#AGCCCAGTGGGGTTCAGTCCATTCTTC#.(((((((((((((((((((((#)))))).)))))))))))....)))).	875	902	1	-24.2	1	0.0162429	0.515	0.110751	0.1206	-3.79332	21	27	11	3UTR
rno-miR-146a-5p	NM_001107754	Traf6	TGAGAACTGAATTCCATGGGTT#GATCCCTGGAAAGCTGAAGTTCTCAT#(((((((((..(((((.(((((#))))).)))))..)...)))))))).	2269	2295	1	-20.3	1	0.0158913	0.485	0.756289	0.301556	-8.00486	19	26	8	3UTR
rno-miR-146a-5p	NM_001109016	Bmx	TGAGAACTGAATTCCATGGGTT#AATTTGTTGGGAGTTCAGTTTTTT#.((((((((((((((.......#.)))))))))))))).	2424	2448	1	-18.8	1	0.0158838	0.662	0.392381	0.141609	-4.02637	14	16	14	3UTR
rno-miR-146a-5p	NM_021655	Chga	TGAGAACTGAATTCCATGGGTT#CCCACGGCAGCATCCAGTTCTCAC#(((((((((....((.((((..#)))).)).......))))))))).	934	958	1	-19.2	1	0.0157782	0.5	-0.218903	0.245251	-12.8738	15	24	9	CDS
rno-miR-146a-5p	NM_001025649	Tm9sf4	TGAGAACTGAATTCCATGGGTT#GACATCGTGGAGTTCATCCCTTCTCT#.(((((.(((((((((((((((#))).))))))))))))....))))).	1996	2022	1	-20.5	0	0.015763	0.5	2.10394	1.99031	-5.33701	20	26	12	CDS
rno-miR-146a-5p	XM_006228109	Zfp329	TGAGAACTGAATTCCATGGGTT#TCCATGGAAGTCACTCAA#((((...(((.(((((((((..#))))))))).))))))).	679	697	1	-18.5	0	0.0155723	0.588	0	0	-14.326	16	18	9	CDS
rno-miR-146a-5p	XM_006228110	Zfp329	TGAGAACTGAATTCCATGGGTT#TCCATGGAAGTCACTCAA#((((...(((.(((((((((..#))))))))).))))))).	579	597	1	-18.5	0	0.0155723	0.588	0	0	-14.326	16	18	9	CDS
rno-miR-146a-5p	NM_012986	Nedd4	TGAGAACTGAATTCCATGGGTT#GACATGGAGTCCGTGGATAGTGAATATTACAGTTCTCT#.(((((((((((((((((((..#.))))))))........))).)))))))).	2048	2086	1	-21.7	1	0.0155658	0.529	2.54802	2.09869	-3.79332	19	30	8	CDS
rno-miR-146a-5p	XM_017595479	Nedd4	TGAGAACTGAATTCCATGGGTT#GACATGGAGTCCGTGGATAGTGAATATTACAGTTCTCT#.(((((((((((((((((((..#.))))))))........))).)))))))).	3750	3788	1	-21.7	1	0.0155658	0.529	0	0	-3.79332	19	30	8	CDS
rno-miR-146a-5p	NM_012653	Slc9a2	TGAGAACTGAATTCCATGGGTT#CCAGATCAGTTCTCAA#((((((((((..((..(((...#))))))))))))))).	2328	2344	1	-16.9	1	0.015462	0.471	0	0	-11.0777	15	16	15	CDS
rno-miR-146a-5p	NM_001000046	Olr1563	TGAGAACTGAATTCCATGGGTT#AATGCATGGCACAGTTCTA#..(((((((....(((((.(((#))).)))))..))))))).	286	305	1	-16.9	1	0.0154428	0.559	0	0	-13.6602	15	19	7	CDS
rno-miR-146a-5p	XM_006254983	Atp9b	TGAGAACTGAATTCCATGGGTT#GGCCCATGGTACCGTAATCTTTTTCGGTTCCTCC#.((((((((((..(((((((((#))))))))).............)))))))).)).	1326	1360	1	-22	1	0.0153101	0.544	0	0	-8.42926	19	34	9	CDS
rno-miR-146a-5p	XM_017600874	Atp9b	TGAGAACTGAATTCCATGGGTT#GGCCCATGGTACCGTAATCTTTTTCGGTTCCTCC#.((((((((((..(((((((((#))))))))).............)))))))).)).	1328	1362	1	-22	1	0.0153101	0.544	0	0	-8.42926	19	34	9	CDS
rno-miR-146a-5p	XM_006228989	RGD1309036	TGAGAACTGAATTCCATGGGTT#CCCATGTATCCGAAAGTTCTCAG#((((((((......((((((..#))))))........)))))))).	519	542	1	-19.1	1	0.0151069	0.382	0	0	-14.554	14	23	8	CDS
rno-miR-146a-5p	XM_017588925	RGD1309036	TGAGAACTGAATTCCATGGGTT#CCCATGTATCCGAAAGTTCTCAG#((((((((......((((((..#))))))........)))))))).	246	269	1	-19.1	1	0.0151069	0.382	0	0	-14.554	14	23	8	CDS
rno-miR-146a-5p	NM_001106655	Nans	TGAGAACTGAATTCCATGGGTT#AATCCGTGGAAAGTCAA#.......(((.(((((((((((#)))))))))))..))).	1071	1088	1	-15.3	0	0.0150753	0.603	1.14636	1.20834	-19.935	14	17	11	CDS
rno-miR-146a-5p	NM_001371259	Tp53bp1	TGAGAACTGAATTCCATGGGTT#AGCCCATGGATATGTCAGTG#.....(((((..((((((((((#))))))))))....))))).	1309	1329	1	-22.3	0	0.015013	0.544	0	0	-19.8372	15	20	10	CDS
rno-miR-146a-5p	XM_017592214	Tp53bp1	TGAGAACTGAATTCCATGGGTT#AGCCCATGGATATGTCAGTG#.....(((((..((((((((((#))))))))))....))))).	1445	1465	1	-22.3	0	0.015013	0.544	0	0	-19.8372	15	20	10	CDS
rno-miR-146a-5p	XM_017592215	Tp53bp1	TGAGAACTGAATTCCATGGGTT#AGCCCATGGATATGTCAGTG#.....(((((..((((((((((#))))))))))....))))).	1818	1838	1	-22.3	0	0.015013	0.544	0	0	-19.8372	15	20	10	CDS
rno-miR-146a-5p	XM_039096356	Prss47	TGAGAACTGAATTCCATGGGTT#AACCCATGAGACTTCTAGTTCTTT#.((((((((((.((((((((((#)))))))).)).))).))))))).	317	341	1	-23	1	0.0150101	0.559	0	0	-7.14013	20	24	8	5UTR
rno-miR-146a-5p	XM_008762740	Slc25a13	TGAGAACTGAATTCCATGGGTT#AGCCCGTGGGATCTGAGCTGGTTCCTAAATCTCGGATTACTCT#.(((((((((((((((((((((#))))))))))))...................)))).)).))).	1981	2024	1	-20.1	1	0.0148922	0.426	0	0	-3.79332	21	43	12	CDS
rno-miR-146a-5p	XM_039108599	Slc25a13	TGAGAACTGAATTCCATGGGTT#AGCCCGTGGGATCTGAGCTGGTTCCTAAATCTCGGATTACTCT#.(((((((((((((((((((((#))))))))))))...................)))).)).))).	1024	1067	1	-20.1	1	0.0148922	0.426	0	0	-3.79332	21	43	12	CDS
rno-miR-146a-5p	NM_024485	Chrna1	TGAGAACTGAATTCCATGGGTT#AGCCCATGGAGCTCACCGCTGTCCTCC#.(((.(((((.(((((((((((#))))))))))).))).....)).))).	56	83	1	-21.1	0	0.0147061	0.324	0	0	-10.7371	19	27	11	5UTR
rno-miR-146a-5p	NM_001107935	Dcaf10	TGAGAACTGAATTCCATGGGTT#AACCAGGAATCAGTTCTCAG#(((((((((.(((((...((((#)))).)))))))))))))).	2635	2655	1	-22.4	1	0.0146125	0.603	0.171262	0.142368	-5.41313	18	20	14	3UTR
rno-miR-146a-5p	XM_039112595	Rapgef5	TGAGAACTGAATTCCATGGGTT#GGCCTCTTGGAATTCTGAAGGACTCGT#((((..((((((((((.(((((#)))))..))))))))...))..)))).	3869	3896	1	-18.8	0	0.0145491	0.559	0	0	-9.95757	19	27	8	3UTR
rno-miR-146a-5p	NM_001109251	Fancd2os	TGAGAACTGAATTCCATGGGTT#AGCGTGCAATCCGCGTGGAGTTCAGTA#.....(((((((((((((((..#.)).))))))))))))).	1	28	1	-22.2	0	0.0145072	0.526	0	0	-13.6656	15	18	13	5UTR
rno-miR-146a-5p	XM_006248507	Lpp	TGAGAACTGAATTCCATGGGTT#GCCCATGGGATTATTCTACGCTCAT#((((....(((((((((((((.#)))))))))))...))....)))).	18651	18676	1	-21.1	0	0.014499	0.471	0	0	-13.8149	17	25	11	3UTR
rno-miR-146a-5p	XM_017597918	Lpp	TGAGAACTGAATTCCATGGGTT#GCCCATGGGATTATTCTACGCTCAT#((((....(((((((((((((.#)))))))))))...))....)))).	10677	10702	1	-21.1	0	0.014499	0.471	0	0	-13.8149	17	25	11	3UTR
rno-miR-146a-5p	NM_001106271	Akap13	TGAGAACTGAATTCCATGGGTT#AACCGCATGGAGACAGTTGTA#..(.(((((..(((((((((((#)))).))))))).))))).).	900	921	1	-18.5	0	0.0144687	0.647	0.729268	0.702384	-12.0563	17	21	7	CDS
rno-miR-146a-5p	NM_001354115	Myof	TGAGAACTGAATTCCATGGGTT#AACCCCGAATGGAATCAAGTTGTCAA#(((.((((..((((((((((((#)))))...)))))))..)))).))).	1337	1363	1	-21.7	0	0.0142999	0.588	0	0	-9.26849	19	26	7	CDS
rno-miR-146a-5p	XM_006231325	Myof	TGAGAACTGAATTCCATGGGTT#AACCCCGAATGGAATCAAGTTGTCAA#(((.((((..((((((((((((#)))))...)))))))..)))).))).	1416	1442	1	-21.7	0	0.0142999	0.588	0	0	-9.26849	19	26	7	CDS
rno-miR-146a-5p	XM_039080632	Myof	TGAGAACTGAATTCCATGGGTT#AACCCCGAATGGAATCAAGTTGTCAA#(((.((((..((((((((((((#)))))...)))))))..)))).))).	1416	1442	1	-21.7	0	0.0142999	0.588	0	0	-9.26849	19	26	7	CDS
rno-miR-146a-5p	NM_001013052	Nat3	TGAGAACTGAATTCCATGGGTT#AACCCATGGAACTGAGCTTAG#((((..((.(.(((((((((((#))))))))))).).)))))).	136	157	1	-19.8	0	0.0142921	0.559	0.666213	0.596827	-13.8387	18	21	11	CDS
rno-miR-146a-5p	NM_001000294	Olr461	TGAGAACTGAATTCCATGGGTT#AGCCATTTCTTGGTCTAGTAGCTTCCTGAGTTCCATGGTTATCAATGTTCTCAC#((((((((((...(((((((..#.)))))))...)))..))))))).	437	491	1	-20.6	1	0.0142726	0.559	0.882357	0.585316	-11.3983	17	24	7	CDS
rno-miR-146a-5p	XM_039110904	Ube2w	TGAGAACTGAATTCCATGGGTT#ATCCGTTGTAGTTTCAGTTCTCAG#(((((((((((..(.((((((.#)))))).)....))))))))))).	4831	4855	1	-20.5	1	0.0142641	0.662	0	0	-9.30896	18	24	11	3UTR
rno-miR-146a-5p	XM_017588686	Pou2f2	TGAGAACTGAATTCCATGGGTT#ACCCGTGGGATCTTCACGTTCTTT#.((((((((((((((((((((.#)))))))))))..))).)))))).	3158	3182	1	-24.3	1	0.014259	0.588	0	0	-3.79332	20	24	11	3UTR
rno-miR-146a-5p	XM_017588687	Pou2f2	TGAGAACTGAATTCCATGGGTT#ACCCGTGGGATCTTCACGTTCTTT#.((((((((((((((((((((.#)))))))))))..))).)))))).	2895	2919	1	-24.3	1	0.014259	0.588	0	0	-3.79332	20	24	11	3UTR
rno-miR-146a-5p	XM_006244477	Dazl	TGAGAACTGAATTCCATGGGTT#AACCCAGGAAAACAGATTCTTAA#(((((((((..((((.((((((#))))))))))..))).)))))).	1671	1694	1	-20.6	1	0.0142465	0.647	0	0	-8.2379	19	23	10	3UTR
rno-miR-146a-5p	NM_031788	Rest	TGAGAACTGAATTCCATGGGTT#CCCATGGAATCTACCAGTGCTTT#.(((.((((.((((((((((..#))))))))))....)))).))).	2754	2777	1	-20.2	0	0.0141425	0.5	2.10645	1.52258	-9.15487	17	23	10	CDS
rno-miR-146a-5p	NM_001127490	Rfx7	TGAGAACTGAATTCCATGGGTT#CTCATGGTTCCAGCTCTCAC#(((((.(((....(((((((..#)))))))...))).))))).	3364	3384	1	-18.6	0	0.014138	0.515	1.56904	1.62692	-14.5417	15	20	7	CDS
rno-miR-146a-5p	NM_001109252	Tatdn2	TGAGAACTGAATTCCATGGGTT#CCCAGAATTCCCACTCACTTCAGTTCTCC#.((((((((((.....((((..#.)))).....)))))))))).	1542	1571	1	-19.7	1	0.0140215	0.515	0.269367	0.280986	-10.2546	14	21	10	CDS
rno-miR-146a-5p	NM_001109094	Etaa1l1	TGAGAACTGAATTCCATGGGTT#CTCATGGATCAAAGTTCAGTTCTCC#.(((((((((((((((((((..#)))))))).....))))))))))).	1779	1804	1	-25.8	1	0.0139553	0.574	0	0	-3.79332	19	25	11	CDS
rno-miR-146a-5p	XM_039092321	Etaa1l1	TGAGAACTGAATTCCATGGGTT#CTCATGGATCAAAGTTCAGTTCTCC#.(((((((((((((((((((..#)))))))).....))))))))))).	1558	1583	1	-25.8	1	0.0139553	0.574	0	0	-3.79332	19	25	11	CDS
rno-miR-146a-5p	NM_012874	Ros1	TGAGAACTGAATTCCATGGGTT#ATCCAAGGATGTCAGTTTTGGA#(.((((((((..(((.(((((.#))))).)))..)))))))).).	572	594	1	-19.8	1	0.0138991	0.559	0.712062	0.671234	-11.5059	17	22	8	CDS
rno-miR-146a-5p	NM_001107014	Alox12e	TGAGAACTGAATTCCATGGGTT#ACCCATGGTCATTCAGCTCCAG#((.((.((((((.((((((((.#))))))))..)))))).)))).	1012	1034	1	-22.4	0	0.0138134	0.412	0.171645	0.79803	-8.6852	18	22	8	CDS
rno-miR-146a-5p	XM_006232045	Npr3	TGAGAACTGAATTCCATGGGTT#CCCATGGTTCAGGACTTC#.(((..(((((..(((((((..#))))))))))))..))).	6204	6222	1	-19.8	0	0.0137986	0.574	0	0	-14.4493	15	18	12	3UTR
rno-miR-146a-5p	NM_001109333	Lrrc14b	TGAGAACTGAATTCCATGGGTT#GCCCAAACGCTGAAAGTTCTCAC#((((((((........(((((.#))))).........)))))))).	1062	1085	1	-16.8	1	0.0137077	0.426	0.658012	0.980238	-15.5225	13	23	8	CDS
rno-miR-146a-5p	XM_017600895	Kctd16	TGAGAACTGAATTCCATGGGTT#CTCATGGGGTCTTTCAGTTTTCT#.(((((((((((((((((((..#))))))))))...))))))))).	12941	12964	1	-23.1	1	0.0136857	0.632	0	0	-3.79332	19	23	10	3UTR
rno-miR-146a-5p	XM_006240400	Vipas39	TGAGAACTGAATTCCATGGGTT#ACCTGGAATTCAGATTCA#...((((((((((((..((((.#))))))))))))).))).	2341	2359	1	-18.2	0	0.0135592	0.588	0	0	-6.74759	16	18	13	3UTR
rno-miR-146a-5p	XM_006255774	Cpne7	TGAGAACTGAATTCCATGGGTT#TCTGTGTATGTACACATTGAAATCAGTTCTCT#.(((((((((.(((.(((.((.#.)).))).))).))))))))).	54	86	1	-18.8	1	0.0135225	0.559	0	0	-7.35355	17	22	9	5UTR
rno-miR-146a-5p	XM_039078765	Trps1	TGAGAACTGAATTCCATGGGTT#GACCCATGGAAAGCCGCATTCTCAT#((((((.((..(((((((((((#))))))))))).....)))))))).	8367	8392	1	-23	0	0.0135132	0.559	0	0	-9.54854	19	25	11	3UTR
rno-miR-146a-5p	XM_039078768	Trps1	TGAGAACTGAATTCCATGGGTT#GACCCATGGAAAGCCGCATTCTCAT#((((((.((..(((((((((((#))))))))))).....)))))))).	8153	8178	1	-23	0	0.0135132	0.559	0	0	-9.54854	19	25	11	3UTR
rno-miR-146a-5p	XM_039083896	Col4a3	TGAGAACTGAATTCCATGGGTT#GACCCAAGGACAGTTCCCAA#((.((((((...(((.((((((#)))))).))))))))).)).	7599	7619	1	-20.2	0	0.0134604	0.412	0	0	-13.1422	17	20	9	3UTR
rno-miR-146a-5p	NM_001107425	Nfat5	TGAGAACTGAATTCCATGGGTT#ACCCATGGGATGCCTGCTTCTCAC#(((((((...(((((((((((.#)))))))))))....).)))))).	6762	6786	1	-23.3	1	0.0133552	0.382	0.579332	0.855883	-8.55011	18	24	11	3UTR
rno-miR-146a-5p	XM_003751872	Nfat5	TGAGAACTGAATTCCATGGGTT#ACCCATGGGATGCCTGCTTCTCAC#(((((((...(((((((((((.#)))))))))))....).)))))).	6709	6733	1	-23.3	1	0.0133552	0.382	0	0	-8.55011	18	24	11	3UTR
rno-miR-146a-5p	XM_017601291	Nfat5	TGAGAACTGAATTCCATGGGTT#ACCCATGGGATGCCTGCTTCTCAC#(((((((...(((((((((((.#)))))))))))....).)))))).	5893	5917	1	-23.3	1	0.0133552	0.382	0	0	-8.55011	18	24	11	3UTR
rno-miR-146a-5p	XM_039081568	Col6a4	TGAGAACTGAATTCCATGGGTT#ATCCGTGGACTTCAGTTTA#...((((((((.(((((((((.#))))))))).)))))))).	809	828	1	-22.8	0	0.0133413	0.456	0	0	-9.86134	17	19	9	CDS
rno-miR-146a-5p	XM_039081569	Col6a4	TGAGAACTGAATTCCATGGGTT#ATCCGTGGACTTCAGTTTA#...((((((((.(((((((((.#))))))))).)))))))).	803	822	1	-22.8	0	0.0133413	0.456	0	0	-9.86134	17	19	9	CDS
rno-miR-146a-5p	NM_001011905	Stat2	TGAGAACTGAATTCCATGGGTT#GCCCATGGTAGGCAACCACAGTGGCACTGAGCCATACCCAACTGAGTTCTTCAGTTCTCT#.(((((((((((((..(((((.#.)))))...))))...))))))))).	3071	3131	1	-21.5	1	0.0133298	0.485	0.132158	-0.128564	-4.76182	18	26	9	3UTR
rno-miR-146a-5p	NM_020082	Rnase4	TGAGAACTGAATTCCATGGGTT#AACCCATGGTGTTAAGTACTTCTCAT#((((((((.(((.(((((((((#))))))))).))).)))...))))).	629	655	1	-22.6	1	0.013303	0.618	0.325659	0.231769	-6.28309	20	26	9	3UTR
rno-miR-146a-5p	XM_017590340	RGD1311595	TGAGAACTGAATTCCATGGGTT#ACCCAGCTGCCTGATACAGTTCTCAA#(((((((((.(((.(((((((.#)))))..))...))).))))))))).	5653	5679	1	-19.5	1	0.0132833	0.559	0	0	-6.03692	19	26	9	CDS
rno-miR-146a-5p	XM_219779	RGD1311595	TGAGAACTGAATTCCATGGGTT#ACCCAGCTGCCTGATACAGTTCTCAA#(((((((((.(((.(((((((.#)))))..))...))).))))))))).	5854	5880	1	-19.5	1	0.0132833	0.559	0	0	-6.03692	19	26	9	CDS
rno-miR-146a-5p	NM_001191857	Rtel1	TGAGAACTGAATTCCATGGGTT#AACCCAGGAACAAAGGCAGCTTCTCAG#(((((((((..((((.((((((#))))))))))......))).)))))).	2014	2041	1	-20.3	1	0.0132516	0.515	1.18012	0.993376	-8.2379	19	27	10	CDS
rno-miR-146a-5p	NM_001025653	Lrrc42	TGAGAACTGAATTCCATGGGTT#GGCCTATGGAAGTCTGGTGCTTT#.(((.(((((.(((((((((((#))))))))))).)).))).))).	614	637	1	-19.2	0	0.0130666	0.544	1.28007	1.28199	-10.7371	19	23	11	CDS
rno-miR-146a-5p	XM_039092583	Tmprss11a	TGAGAACTGAATTCCATGGGTT#ACCTATGACATTTCTCACTAAGTGCTATGGGATCAGTTTTTAA#(((((((((.(((((((((...#.)))))))))))))))))).	2282	2325	1	-21.2	1	0.0130039	0.618	0	0	-5.18008	18	20	18	3UTR
rno-miR-146a-5p	XM_039103936	LOC102553503	TGAGAACTGAATTCCATGGGTT#GATGGGCAGGAATTCAGAGCTCAC#((((..(((((((((.((....#.)))))))))))..)))).	588	612	1	-19.4	0	0.0129625	0.471	0	0	-10.1906	15	19	11	CDS
rno-miR-146a-5p	NM_001000799	Olr1286	TGAGAACTGAATTCCATGGGTT#GCATCAGTAATCATGGGATTCATGTTTA#...((((((((((((((((...#.)))))))))))).)))).	465	493	1	-18.6	0	0.0126012	0.647	-0.325708	0.0903247	-6.51454	16	19	12	CDS
rno-miR-146a-5p	NM_001000749	Olr57	TGAGAACTGAATTCCATGGGTT#GGCCAAATGTTCTTTATCCATGGCTTCACATTCATGGAATCCTCAGTCCTCT#.(((.((((((((((((((((.#.)))))))))))..))))).))).	300	352	1	-21.9	0	0.0125995	0.544	0.862809	0.661675	-7.91236	19	24	11	CDS
rno-miR-146a-5p	NM_017136	Sqle	TGAGAACTGAATTCCATGGGTT#CCCAGTCCAGTTCTCAT#(((((((((.((....((((..#)))))).))))))))).	1049	1066	1	-17.2	1	0.012579	0.456	1.92972	1.75421	-8.29455	15	17	9	CDS
rno-miR-146a-5p	NM_175580	Gnl3	TGAGAACTGAATTCCATGGGTT#CCTGTGGAAAAGGAGTTCA#...(((((...(((((((((..#)))))))))....))))).	775	794	1	-17.7	0	0.0124645	0.5	0.611124	0.69234	-11.6382	14	19	9	CDS
rno-miR-146a-5p	XM_017599969	Nrg1	TGAGAACTGAATTCCATGGGTT#CTCTGGGGATAGACGGTTCTCAT#(((((((((.(((((..(((..#)))..)))))...))))))))).	3819	3842	1	-20.5	1	0.0124637	0.5	0	0	-5.41313	17	23	9	5UTR
rno-miR-146a-5p	NM_001305171	Fam184b	TGAGAACTGAATTCCATGGGTT#CCCATCGGAATCGGTCCTTCTCT#.((((((((.((((((((((..#))))).)))))))))...)))).	3590	3613	1	-20.5	1	0.012415	0.471	0.809634	1.09351	-5.03583	18	23	9	CDS
rno-miR-146a-5p	NM_031544	Ampd3	TGAGAACTGAATTCCATGGGTT#GACCCTGTAGAGCAGTTCTCAC#(((((((((.....((.(((((#))))))).....))))))))).	2777	2799	1	-20.5	1	0.0123934	0.426	0.427732	0.288233	-13.4976	16	22	9	3UTR
rno-miR-146a-5p	XM_039107553	Ate1	TGAGAACTGAATTCCATGGGTT#TCCTGAGTTCAGTTCCCAG#((.(((((((((((...(((..#))).))))))))))).)).	5524	5543	1	-18	0	0.0123812	0.485	0	0	-6.46361	16	19	11	3UTR
rno-miR-146a-5p	XM_039107558	Ate1	TGAGAACTGAATTCCATGGGTT#TCCTGAGTTCAGTTCCCAG#((.(((((((((((...(((..#))).))))))))))).)).	5524	5543	1	-18	0	0.0123812	0.485	0	0	-6.46361	16	19	11	3UTR
rno-miR-146a-5p	XM_039107560	Ate1	TGAGAACTGAATTCCATGGGTT#TCCTGAGTTCAGTTCCCAG#((.(((((((((((...(((..#))).))))))))))).)).	5655	5674	1	-18	0	0.0123812	0.485	0	0	-6.46361	16	19	11	3UTR
rno-miR-146a-5p	XM_039107566	Ate1	TGAGAACTGAATTCCATGGGTT#TCCTGAGTTCAGTTCCCAG#((.(((((((((((...(((..#))).))))))))))).)).	5395	5414	1	-18	0	0.0123812	0.485	0	0	-6.46361	16	19	11	3UTR
rno-miR-146a-5p	NM_001100898	Mtf2	TGAGAACTGAATTCCATGGGTT#CCCAAGGAATTCAGTG#.....((((((((((.((((..#)))).)))))))))).	81	97	1	-22	0	0.0123664	0.412	1.75249	1.67304	-13.8986	14	16	10	5UTR
rno-miR-146a-5p	XM_039092150	Mtf2	TGAGAACTGAATTCCATGGGTT#CCCAAGGAATTCAGTG#.....((((((((((.((((..#)))).)))))))))).	132	148	1	-22	0	0.0123664	0.412	0	0	-13.8986	14	16	10	5UTR
rno-miR-146a-5p	XM_006255325	LOC686013	TGAGAACTGAATTCCATGGGTT#CCCAGCAGCTAACCCTGCGCTTGGAACAGTTAGTTCTCAT#((((((((((.(((((.(.((.#.)).).)))))...)))))))))).	1476	1516	1	-21.4	1	0.0122993	0.456	0	0	-6.76235	18	25	10	CDS
rno-miR-146a-5p	XM_039107398	Setd5	TGAGAACTGAATTCCATGGGTT#ATCCAGTGGTCTGGGTAATCTTTGGATTTTAGTTTTCC#.((((((((((.((((.(((((#.))))).)))).)))))))))).	5644	5682	1	-20	1	0.012251	0.574	0	0	-7.14013	19	23	10	3UTR
rno-miR-146a-5p	NM_001277056	Arfgef1	TGAGAACTGAATTCCATGGGTT#TCTATTGGAGAAACCAGTTCTCAA#(((((((((..(((((((((..#))))).))))....))))))))).	3480	3504	1	-19	1	0.0122035	0.574	2.09437	2.1884	-8.00486	18	24	9	CDS
rno-miR-146a-5p	XM_008764657	LOC314140	TGAGAACTGAATTCCATGGGTT#AGCCCATGTGTAATACGTTCTCAG#(((((((.(.((((((((((((#)))))))).).))).)))))))).	1756	1780	1	-20.3	1	0.0121672	0.559	0	0	-7.49372	20	24	8	3UTR
rno-miR-146a-5p	XM_039098466	Sgpl1	TGAGAACTGAATTCCATGGGTT#GACCCTTGATAGATCCATGGAACTTCAGGCCTTC#.(((..((((((((((((((((#.))))))))))).)))))..))).	1846	1880	1	-24.1	0	0.0121542	0.544	0	0	-9.81332	19	24	11	3UTR
rno-miR-146a-5p	XM_006243410	Arpp19	TGAGAACTGAATTCCATGGGTT#CCTATGGAATCCAGGCATCAT#(((...(((.((((((((((..#)))))))))).)))...))).	2135	2156	1	-20.7	0	0.0120152	0.529	0	0	-14.2321	16	21	10	3UTR
rno-miR-146a-5p	XM_001068528	Fam155b	TGAGAACTGAATTCCATGGGTT#ACCTATGGGGCTTAGTTA#....((((((.((((((((((.#)))))))))).)))))).	2678	2696	1	-18.8	0	0.0119369	0.412	0	0	-12.3713	16	18	10	3UTR
rno-miR-146a-5p	NM_012638	Pygm	TGAGAACTGAATTCCATGGGTT#GGCCCACTCCAGGGGTTGGGCCCCTGGAATTACATCTCT#.((((..(((((((((.(((((#.))))).))))))).)))))).	2632	2671	1	-19.9	0	0.0119289	0.426	0.287512	0.103486	-7.23797	18	22	7	3UTR
rno-miR-146a-5p	XM_006244165	Zbtb47	TGAGAACTGAATTCCATGGGTT#CCCATGGGTTTCCTTTCTCAC#((((((..(((.((((((((..#)))))))).)))..)))))).	3128	3149	1	-23.3	0	0.0116967	0.353	0	0	-11.1417	17	21	8	3UTR
rno-miR-146a-5p	NM_053339	Acox3	TGAGAACTGAATTCCATGGGTT#ACCCAGGAATTCATCTTAC#(((((..((((((((.(((((.#)))))))))))))))))).	683	702	1	-20.8	0	0.0114799	0.559	0.475905	1.12858	-7.61527	18	19	18	CDS
rno-miR-146a-5p	XM_039092496	Acox3	TGAGAACTGAATTCCATGGGTT#ACCCAGGAATTCATCTTAC#(((((..((((((((.(((((.#)))))))))))))))))).	682	701	1	-20.8	0	0.0114799	0.559	0	0	-7.61527	18	19	18	CDS
rno-miR-146a-5p	XM_039101380	LOC120099997	TGAGAACTGAATTCCATGGGTT#CCCTAATGTTTGGTTCTCT#.(((((((((((.....(((..#)))....))))))))))).	712	731	1	-17.2	1	0.0113048	0.618	0	0	-6.90779	14	19	11	CDS
rno-miR-146a-5p	NM_001304287	Dlgap1	TGAGAACTGAATTCCATGGGTT#ACTCACCCTCCTCAGTTCTCT#.(((((((((.......((((.#.))))...))))))))).	2480	2501	1	-17.6	1	0.0111583	0.485	1.02009	0.846262	-13.0794	13	18	9	3UTR
rno-miR-146a-5p	NM_022946	Dlgap1	TGAGAACTGAATTCCATGGGTT#ACTCACCCTCCTCAGTTCTCT#.(((((((((.......((((.#.))))...))))))))).	3504	3525	1	-17.6	1	0.0111583	0.485	1.02009	0.846262	-13.0794	13	18	9	3UTR
rno-miR-146a-5p	NM_031018	Atf2	TGAGAACTGAATTCCATGGGTT#GATCCAGCACAGCTCTGTCAGTACGTCCAATGGAGTCAGTTCA#...((((((.((((((((((..#.)))).)))))))))))).	1636	1679	1	-19.8	0	0.0111209	0.515	0.487533	0.680089	-7.75705	16	19	12	CDS
rno-miR-146a-5p	XM_039105916	Atf2	TGAGAACTGAATTCCATGGGTT#TCCAATGGAGTCAGTTCA#...((((((.((((((((((..#)))).)))))))))))).	1381	1399	1	-19.8	0	0.0111209	0.515	0	0	-7.75705	16	18	12	CDS
rno-miR-146a-5p	XM_006233320	Ints12	TGAGAACTGAATTCCATGGGTT#CCCAGGAATCTCAGCTCAA#((((..(((((((((.((((..#))))))))).)))))))).	2368	2387	1	-19	0	0.0111032	0.559	0	0	-10.1906	17	19	9	CDS
rno-miR-146a-5p	XM_006233321	Ints12	TGAGAACTGAATTCCATGGGTT#CCCAGGAATCTCAGCTCAA#((((..(((((((((.((((..#))))))))).)))))))).	1468	1487	1	-19	0	0.0111032	0.559	0	0	-10.1906	17	19	9	CDS
rno-miR-146a-5p	XM_039102064	Igsf3	TGAGAACTGAATTCCATGGGTT#AGCCGGTGGAGTTCAGATGTATCCTAGAGGCTCAG#((((..(((((((((((.((((#)))).)))))))))))..............)))).	1688	1723	1	-23.6	0	0.0110875	0.456	0	0	-9.95757	19	35	11	CDS
rno-miR-146a-5p	XM_039102066	Igsf3	TGAGAACTGAATTCCATGGGTT#AGCCGGTGGAGTTCAGATGTATCCTAGAGGCTCAG#((((..(((((((((((.((((#)))).)))))))))))..............)))).	1688	1723	1	-23.6	0	0.0110875	0.456	0	0	-9.95757	19	35	11	CDS
rno-miR-146a-5p	NM_001106428	Hspa4l	TGAGAACTGAATTCCATGGGTT#ATCCATGGAATCTTCAGTG#.....((((((((((((((((.#)))))))))))..))))).	2038	2057	1	-20.3	0	0.0110686	0.588	0	0	-13.6656	16	19	11	CDS
rno-miR-146a-5p	XM_039082699	Itga9	TGAGAACTGAATTCCATGGGTT#GGGTCATGGAATTCTCTCAA#(((((...(((((((((((.((#)).)))))))))))))))).	5720	5740	1	-20	0	0.0109117	0.426	0	0	-9.69585	18	20	16	3UTR
rno-miR-146a-5p	NM_001271173	Sbf1	TGAGAACTGAATTCCATGGGTT#CCCATGGAGTTTGAGTTCAGTCAGTTCTA#..((((((((((((((((((..#))))))))))..........)))))))).	4697	4726	1	-25	1	0.0108472	0.559	1.6928	1.47443	-4.957	18	29	10	CDS
rno-miR-146a-5p	XM_008763404	Klra2	TGAGAACTGAATTCCATGGGTT#ACCTGTGGTGTTCTTTAGTTCTGAA#(.((((((((((.((((((((.#)))))))).))))...)))))).).	1874	1899	1	-20.6	1	0.010713	0.662	0	0	-6.39038	19	25	8	3UTR
rno-miR-146a-5p	XM_017592743	Klra2	TGAGAACTGAATTCCATGGGTT#ACCTGTGGTGTTCTTTAGTTCTGAA#(.((((((((((.((((((((.#)))))))).))))...)))))).).	1964	1989	1	-20.6	1	0.010713	0.662	0	0	-6.39038	19	25	8	3UTR
rno-miR-146a-5p	NM_023024	Dync2h1	TGAGAACTGAATTCCATGGGTT#GCCCAGTGGAGAAAGGATTCAGTTTG#...((((((((((((((((((.#))))).))))......))))))))).	6626	6652	1	-19.4	0	0.0106469	0.574	1.75295	1.7429	-6.51454	18	26	9	CDS
rno-miR-146a-5p	NM_001099504	Vom2r79	TGAGAACTGAATTCCATGGGTT#ATCCACGGATCAGTCTCAA#((((.(((((..(((.(((((.#))))).)))))))))))).	202	221	1	-18.8	0	0.0105611	0.647	0.849604	1.25187	-14.4612	17	19	12	CDS
rno-miR-146a-5p	XM_039099757	Med14	TGAGAACTGAATTCCATGGGTT#CCATGGGATTCTAGTTTG#...((((((((((((((((...#))))))))))).))))).	5998	6016	1	-21.1	0	0.0105492	0.676	0	0	-6.51454	16	18	11	3UTR
rno-miR-146a-5p	NM_001000182	Olr184	TGAGAACTGAATTCCATGGGTT#GCTCCTGGACGTGGTTCTCAT#((((((((....((((.((((.#)))).))))...)))))))).	635	656	1	-18.4	1	0.0105352	0.544	0.393071	0.381316	-12.408	16	21	8	CDS
rno-miR-146a-5p	NM_021666	Trdn	TGAGAACTGAATTCCATGGGTT#GATGGGTACAATGGCTATGGATTTCAGTTTC#...((((((((.(((((((.(.#.).))))))).)))))))).	2037	2068	1	-20.2	0	0.0105319	0.515	0.428198	0.0173101	-9.86134	16	20	8	CDS
rno-miR-146a-5p	XM_039085426	Map2k4	TGAGAACTGAATTCCATGGGTT#GCCCATACATTGTTCAGTTCTA#..((((((((((...((((((.#)))))).....)))))))))).	576	598	1	-20.6	1	0.0105308	0.515	0	0	-7.83842	16	22	10	CDS
rno-miR-146a-5p	NM_001107482	Ppp1r37	TGAGAACTGAATTCCATGGGTT#CCCGTGGAGTCAACTGTTCTTT#.((((((((.((((((((((..#))))))))))))...)))))).	15	37	1	-21.6	1	0.0105235	0.485	0.767011	0.289647	-5.03583	18	22	12	5UTR
rno-miR-146a-5p	NM_001109246	Exoc6b	TGAGAACTGAATTCCATGGGTT#CCCATGGCCATTCATCTCT#.((((..(((((.(((((((..#)))))))..))))))))).	3148	3167	1	-19.5	0	0.0104711	0.529	1.63321	2.43339	-8.5271	16	19	9	3UTR
rno-miR-146a-5p	XM_006245662	Lpin2	TGAGAACTGAATTCCATGGGTT#GACAATGTTTAATTAAAGAAAAAAAGGACCATGTGAAGCACAGTTCTCAG#(((((((((..((((((((...#.))))).)))...))))))))).	7681	7731	1	-23.3	1	0.0104259	0.574	0	0	-8.00486	17	23	9	3UTR
rno-miR-146a-5p	NM_001105744	Eif2ak4	TGAGAACTGAATTCCATGGGTT#AATCCATGGAACAACAGTAGTCC#.((..((((..(((((((((((#)))))))))))...))))..)).	4663	4686	1	-19.7	0	0.0103231	0.603	1.40099	1.29277	-15.0117	17	23	11	CDS
rno-miR-146a-5p	NM_001100894	Wdr20	TGAGAACTGAATTCCATGGGTT#CCTATGGAGTTTAGTG#.....(((((((((((((((..#))))))))))))))).	1099	1115	1	-21.9	0	0.0103049	0.544	2.29625	1.9458	-13.6656	15	16	15	CDS
rno-miR-146a-5p	XM_006240583	Wdr20	TGAGAACTGAATTCCATGGGTT#CCTATGGAGTTTAGTG#.....(((((((((((((((..#))))))))))))))).	1111	1127	1	-21.9	0	0.0103049	0.544	0	0	-13.6656	15	16	15	CDS
rno-miR-146a-5p	XM_039112413	Wdr20	TGAGAACTGAATTCCATGGGTT#CCTATGGAGTTTAGTG#.....(((((((((((((((..#))))))))))))))).	940	956	1	-21.9	0	0.0103049	0.544	0	0	-13.6656	15	16	15	CDS
rno-miR-146a-5p	NM_001389256	Ptch1	TGAGAACTGAATTCCATGGGTT#GGCCCATGCATTCAGTG#.....(((((((..((((((((#)))))))).))))))).	1669	1686	1	-18.7	0	0.0102832	0.515	0	0	-15.8116	15	17	8	CDS
rno-miR-146a-5p	NM_001024270	Pelp1	TGAGAACTGAATTCCATGGGTT#GAGTTAGAAGAGGTAGAAGATGTGGAGTTCGGTTCA#...((((((((((((((.....#.)))))))))))))).	2876	2912	1	-21.2	0	0.0102727	0.485	1.27231	1.21067	-6.51454	14	16	14	CDS
rno-miR-146a-5p	NM_001106188	Wwox	TGAGAACTGAATTCCATGGGTT#ACCCTGGAAACATGATGTTCTCAG#(((((((....(((((.((((.#))))))))).......))))))).	1065	1089	1	-19.2	1	0.0102496	0.5	0	0	-11.3749	16	24	9	CDS
rno-miR-146a-5p	XM_006255666	Wwox	TGAGAACTGAATTCCATGGGTT#ACCCTGGAAACATGATGTTCTCAG#(((((((....(((((.((((.#))))))))).......))))))).	1062	1086	1	-19.2	1	0.0102496	0.5	0	0	-11.3749	16	24	9	CDS
rno-miR-146a-5p	XM_008772491	Wwox	TGAGAACTGAATTCCATGGGTT#ACCCTGGAAACATGATGTTCTCAG#(((((((....(((((.((((.#))))))))).......))))))).	1062	1086	1	-19.2	1	0.0102496	0.5	0	0	-11.3749	16	24	9	CDS
rno-miR-146a-5p	XM_039097634	Wwox	TGAGAACTGAATTCCATGGGTT#ACCCTGGAAACATGATGTTCTCAG#(((((((....(((((.((((.#))))))))).......))))))).	1062	1086	1	-19.2	1	0.0102496	0.5	0	0	-11.3749	16	24	9	CDS
rno-miR-146a-5p	XM_039084877	Ppip5k2	TGAGAACTGAATTCCATGGGTT#GACCTATGGACTCAGATCTA#..(((.((((..((((((((((#)))))))))).)))).))).	4982	5002	1	-21	0	0.0101783	0.529	0	0	-13.0295	17	20	10	3UTR
rno-miR-146a-5p	XM_039084885	Ppip5k2	TGAGAACTGAATTCCATGGGTT#GACCTATGGACTCAGATCTA#..(((.((((..((((((((((#)))))))))).)))).))).	4808	4828	1	-21	0	0.0101783	0.529	0	0	-13.0295	17	20	10	3UTR
rno-miR-146a-5p	XM_039084886	Ppip5k2	TGAGAACTGAATTCCATGGGTT#GACCTATGGACTCAGATCTA#..(((.((((..((((((((((#)))))))))).)))).))).	4799	4819	1	-21	0	0.0101783	0.529	0	0	-13.0295	17	20	10	3UTR
rno-miR-146a-5p	NM_001109220	Pex1	TGAGAACTGAATTCCATGGGTT#GGCTCATTGGAACTCGGTGCTTTCAA#((((((((((.(((((((((((#))))))).)))).)))))..))))).	792	818	1	-19.2	1	0.0101483	0.5	0.122935	0.689938	-6.76235	21	26	7	CDS
rno-miR-146a-5p	NM_001270038	RGD1565367	TGAGAACTGAATTCCATGGGTT#ACCCATGGAGTGTTACAGA#......(((.(((((((((((.#)))))))))))....))).	1823	1842	1	-18.1	0	0.0101349	0.456	0.873154	1.13202	-16.8091	14	19	11	CDS
rno-miR-146a-5p	XM_342311	Strip1	TGAGAACTGAATTCCATGGGTT#CCCATGAAGAAAGTTCTCT#.(((((((...((.((((((..#))))))))...))))))).	984	1003	1	-19.8	1	0.00998676	0.456	0	0	-9.77384	15	19	8	CDS
rno-miR-146a-5p	NM_198780	Pck1	TGAGAACTGAATTCCATGGGTT#ACTCAGGAATCCAGTTCTTC#.((((((((.(((((.(((((.#)))))))))).)))))))).	2245	2265	1	-21.3	1	0.00985495	0.529	0.131567	0.260813	-5.26888	18	20	10	3UTR
rno-miR-146a-5p	XM_039081499	Lctl	TGAGAACTGAATTCCATGGGTT#CCCGTGGGATTAGAAACTCT#.(((.....(((((((((((..#))))))))))).....))).	507	527	1	-19.4	0	0.0098396	0.412	0	0	-14.727	14	20	11	5UTR
rno-miR-146a-5p	NM_001009633	Abraxas1	TGAGAACTGAATTCCATGGGTT#GGACATACAGTTCTCAA#(((((((((.(((((.......#))).)).))))))))).	635	652	1	-16.9	1	0.00959688	0.647	1.27995	1.20934	-5.41313	14	17	9	CDS
rno-miR-146a-5p	XM_008759870	Xpo6	TGAGAACTGAATTCCATGGGTT#AAGTCGTCTGGGAGACAAGGAAGCAGTTCTCAA#(((((((((..((((.((..((#.))..)).)))).))))))))).	1428	1461	1	-19.6	1	0.00952031	0.529	0	0	-8.2379	17	23	9	CDS
rno-miR-146a-5p	NM_001191105	Magohb	TGAGAACTGAATTCCATGGGTT#CCACGTGGAATGGACAGTTCTTAT#(((((((((.((((((((((..#)).))))))))...))))))))).	595	619	1	-23.1	1	0.00942803	0.68	1.9283	1.72432	-5.18008	19	24	9	3UTR
rno-miR-146a-5p	XM_039100431	Tenm1	TGAGAACTGAATTCCATGGGTT#GCTCGTGGAAACAAAAGATCTCT#.((((.((...((((((((((.#)))))))))).....)).)))).	4454	4477	1	-18.2	0	0.00933718	0.618	0	0	-10.818	16	23	10	CDS
rno-miR-146a-5p	XM_039100434	Tenm1	TGAGAACTGAATTCCATGGGTT#GCTCGTGGAAACAAAAGATCTCT#.((((.((...((((((((((.#)))))))))).....)).)))).	4359	4382	1	-18.2	0	0.00933718	0.618	0	0	-10.818	16	23	10	CDS
rno-miR-146a-5p	NM_001191661	Urb1	TGAGAACTGAATTCCATGGGTT#GACCTCTGCTGTTCTCGAAAGCATGGGATTAGTTTTTAT#(((((((((.((((((((....#.))))))))))))))))).	945	984	1	-17.8	1	0.00928747	0.5	0.123292	0.40854	-5.18008	17	19	17	CDS
rno-miR-146a-5p	NM_021671	Tmem33	TGAGAACTGAATTCCATGGGTT#CCCTGCAGGTTCAGTTCA#...((((((((((....(((..#)))....)))))))))).	1495	1513	1	-17.1	0	0.00924947	0.559	0	0	-8.33988	13	18	10	3UTR
rno-miR-146a-5p	NM_001374009	Ankrd11	TGAGAACTGAATTCCATGGGTT#CCATGGAATCTACAGTTG#....(((((.(((((((((...#)))))))))...))))).	389	407	1	-18.5	0	0.00922143	0.574	0	0	-10.7891	14	18	9	5UTR
rno-miR-146a-5p	XM_017601456	Ankrd11	TGAGAACTGAATTCCATGGGTT#CCATGGAATCTACAGTTG#....(((((.(((((((((...#)))))))))...))))).	182	200	1	-18.5	0	0.00922143	0.574	0	0	-10.7891	14	18	9	5UTR
rno-miR-146a-5p	NM_001047865	Cntnap5a	TGAGAACTGAATTCCATGGGTT#GCCCTTGGTCATCATGGGTAGCCTTCTAGATGATCAGCATTGGCATTCAGTTCTCC#.(((((((((((.(((..(.(.#.).)..))).))))))))))).	764	820	1	-21	1	0.00917186	0.485	0	0	-5.08246	16	22	11	CDS
rno-miR-146a-5p	NM_001024756	Ythdf1	TGAGAACTGAATTCCATGGGTT#ACCTCTGCAGTTAAAACAGTGGGTTCAGTTGTCAA#(((.(((((((.(((((..(((#.))).)))))))))))).))).	732	767	1	-18.9	0	0.00914852	0.515	0.404999	0.113181	-10.3164	18	22	12	CDS
rno-miR-146a-5p	NM_001014226	Naa60	TGAGAACTGAATTCCATGGGTT#TGATGGAAACGGTTCTTAC#(((((((((..((((((.(...#).)))))).))))))))).	1314	1333	1	-17.1	1	0.00903736	0.544	0.625918	0.379401	-8.00486	16	19	9	3UTR
rno-miR-146a-5p	XM_008767792	Arhgef15	TGAGAACTGAATTCCATGGGTT#GAGCCATGGATTCTGGTCTCT#.((((...(((.(((((((.((#)).))))))))))...)))).	3581	3602	1	-19.8	0	0.00902984	0.515	0	0	-12.8984	16	21	10	3UTR
rno-miR-146a-5p	NM_001108199	Trerf1	TGAGAACTGAATTCCATGGGTT#AGCCGTGGAGTAGGGTGGACTCTTTCTCTCAT#((((((((..(((((((((.(.#).)))))))))..)))..........))))).	110	142	1	-18.8	1	0.00901632	0.559	1.40729	0.821232	-6.23647	18	32	9	5UTR
rno-miR-146a-5p	NM_001109506	Elmod2	TGAGAACTGAATTCCATGGGTT#TCCGTGGAAACCAGTTTA#...((((((..(((((((((..#)))))))))..)))))).	2130	2148	1	-19.6	0	0.00898462	0.603	0.245939	0.208971	-10.5818	15	18	9	3UTR
rno-miR-146a-5p	NM_001100577	Apbb1ip	TGAGAACTGAATTCCATGGGTT#ACAGTTCGAAAATGTTAACATTTACTATGGGATTCAGTG#.....((((((((((((((...#.)))))))))))))).	1073	1112	1	-21.3	0	0.00887411	0.632	0.624796	0.276862	-13.6656	14	16	14	CDS
rno-miR-146a-5p	XM_006255855	Tmlhe	TGAGAACTGAATTCCATGGGTT#ACCCATGGAATAAGGAGCTG#..((..((..(((((((((((.#)))))))))))..))..)).	1120	1140	1	-20.7	0	0.00886172	0.588	0	0	-13.2759	15	20	11	CDS
rno-miR-146a-5p	XM_039098397	Tmlhe	TGAGAACTGAATTCCATGGGTT#ACCCATGGAATAAGGAGCTG#..((..((..(((((((((((.#)))))))))))..))..)).	1394	1414	1	-20.7	0	0.00886172	0.588	0	0	-13.2759	15	20	11	CDS
rno-miR-146a-5p	NM_013044	Tmod1	TGAGAACTGAATTCCATGGGTT#AACACCATGGGAGCCAGTA#.....((((..(((((((((((#))).))))))))..)))).	2202	2221	1	-19	0	0.00881486	0.588	0.770652	0.492391	-17.7329	15	19	8	3UTR
rno-miR-146a-5p	XM_039109313	Tmod1	TGAGAACTGAATTCCATGGGTT#AACACCATGGGAGCCAGTA#.....((((..(((((((((((#))).))))))))..)))).	2025	2044	1	-19	0	0.00881486	0.588	0	0	-17.7329	15	19	8	3UTR
rno-miR-146a-5p	XM_039101513	LOC102546375	TGAGAACTGAATTCCATGGGTT#CCCATGGTCACGTATCTCAC#((((((((((...(((((((..#)))))))))).)).))))).	1533	1553	1	-19.1	1	0.0087575	0.471	0	0	-11.3983	17	20	10	CDS
rno-miR-146a-5p	XM_008761705	Orc4	TGAGAACTGAATTCCATGGGTT#AACCCATGGAAAGAACCTCAGTCAATTCTCAG#((((((((((.(((((((((((#)))))))))))......)))))....))))).	1427	1459	1	-24	1	0.00871332	0.647	0	0	-6.76235	21	32	11	CDS
rno-miR-146a-5p	XM_039104467	Orc4	TGAGAACTGAATTCCATGGGTT#AACCCATGGAAAGAACCTCAGTCAATTCTCAG#((((((((((.(((((((((((#)))))))))))......)))))....))))).	1513	1545	1	-24	1	0.00871332	0.647	0	0	-6.76235	21	32	11	CDS
rno-miR-146a-5p	XM_008773357	Brwd3	TGAGAACTGAATTCCATGGGTT#GCCCAGTAAAATTTACTGAGAGATCCAGACCTGGAGTTCAGATATCTTG#.((((.((((((((((((((((#.))))))....))))))))))...)))).	1143	1192	1	-21.1	0	0.0086973	0.603	0	0	-5.69428	20	29	10	CDS
rno-miR-146a-5p	XM_039100563	Brwd3	TGAGAACTGAATTCCATGGGTT#GCCCAGTAAAATTTACTGAGAGATCCAGACCTGGAGTTCAGATATCTTG#.((((.((((((((((((((((#.))))))....))))))))))...)))).	1144	1193	1	-21.1	0	0.0086973	0.603	0	0	-5.69428	20	29	10	CDS
rno-miR-146a-5p	NM_001107697	Otud7b	TGAGAACTGAATTCCATGGGTT#ACCCTGGGAAGAAAGTTCTCAA#((((((((...((((..((((.#))))..))))...)))))))).	3207	3229	1	-24.5	1	0.00865753	0.559	0.427608	0.708055	-9.29429	16	22	8	3UTR
rno-miR-146a-5p	XM_017600104	Spock3	TGAGAACTGAATTCCATGGGTT#AAACCATGGACTCTCAGTTTTA#..((((((((..(((((((...#.)))))))...)))))))).	2200	2222	1	-20	1	0.00850649	0.676	0	0	-11.1286	15	20	8	3UTR
rno-miR-146a-5p	XM_017600105	Spock3	TGAGAACTGAATTCCATGGGTT#AAACCATGGACTCTCAGTTTTA#..((((((((..(((((((...#.)))))))...)))))))).	2217	2239	1	-20	1	0.00850649	0.676	0	0	-11.1286	15	20	8	3UTR
rno-miR-146a-5p	XM_039112055	Esrrb	TGAGAACTGAATTCCATGGGTT#AACCTATGGAGAATTCAGG#......((((((((((((((((#))))))))))..)))))).	2491	2510	1	-20.2	0	0.00847717	0.471	0	0	-15.5666	16	19	10	3UTR
rno-miR-146a-5p	XM_039112056	Esrrb	TGAGAACTGAATTCCATGGGTT#AACCTATGGAGAATTCAGG#......((((((((((((((((#))))))))))..)))))).	4930	4949	1	-20.2	0	0.00847717	0.471	0	0	-15.5666	16	19	10	3UTR
rno-miR-146a-5p	NM_001107934	Trim14	TGAGAACTGAATTCCATGGGTT#AACTGGTGGAAGTCAGTTTTG#..((((((((.((((((.((((#)))).)))))).)))))))).	3118	3139	1	-21.8	1	0.00847023	0.485	0.517776	0.757378	-7.78178	18	21	8	3UTR
rno-miR-146a-5p	XM_008766400	Herc1	TGAGAACTGAATTCCATGGGTT#AGCCTATGGAAGAAATTTCTCAC#((((((.....(((((((((((#))))))))))).....)))))).	35	58	1	-21.7	0	0.00837904	0.603	0	0	-12.9186	17	23	11	5UTR
rno-miR-146a-5p	XM_006245039	Nrp2	TGAGAACTGAATTCCATGGGTT#CTATGGATGGAGCTTCAACCTCAGGAGACCTCAGTTCTTAT#((((((((((.((((..(((((#.)))))..))))...)))))))))).	4893	4934	1	-21.4	1	0.00836687	0.559	0	0	-6.9954	19	26	10	3UTR
rno-miR-146a-5p	XM_008767137	Nrp2	TGAGAACTGAATTCCATGGGTT#CTATGGATGGAGCTTCAACCTCAGGAGACCTCAGTTCTTAT#((((((((((.((((..(((((#.)))))..))))...)))))))))).	4842	4883	1	-21.4	1	0.00836687	0.559	0	0	-6.9954	19	26	10	3UTR
rno-miR-146a-5p	NM_178092	Slc4a10	TGAGAACTGAATTCCATGGGTT#CTTATGGGTTCATCAGTTTTTAT#((((((((((..((((((((..#))))))))....)))))))))).	2809	2832	1	-18.1	1	0.00827328	0.603	2.00599	2.15393	-10.1092	18	23	10	CDS
rno-miR-146a-5p	NM_001013227	Cops8	TGAGAACTGAATTCCATGGGTT#TCCTTGGAGCAGTTTTCC#.((((((((..(((((.(((..#))).))))))))))))).	852	870	1	-17.5	1	0.00827295	0.574	0.391107	0.528842	-7.86061	16	18	13	3UTR
rno-miR-146a-5p	XM_039082538	Phip	TGAGAACTGAATTCCATGGGTT#ACCCATGGAGTTATGTAAAGATGTCAGGCTCAT#((((..(((((((((((((((.#)))))))))))............)))).)))).	4513	4546	1	-23.4	0	0.00826437	0.647	0	0	-9.95757	19	33	11	CDS
rno-miR-146a-5p	NM_001108586	Rcn1	TGAGAACTGAATTCCATGGGTT#AACTCTTGGCAAATTGCAGTTCTCT#.(((((((((((((((.(((((#))))).)))..)))).)))))))).	1634	1659	1	-20.3	1	0.00812058	0.588	1.56024	0.958509	-3.79332	20	25	8	3UTR
rno-miR-146a-5p	XM_006233132	Kcna2	TGAGAACTGAATTCCATGGGTT#ACCCATGGAGCCAGCATCTCAG#(((((.(((..((((((((((.#)))))))))).)))..))))).	2881	2903	1	-23.4	0	0.00808409	0.456	0	0	-9.90581	18	22	10	3UTR
rno-miR-146a-5p	XM_006233133	Kcna2	TGAGAACTGAATTCCATGGGTT#ACCCATGGAGCCAGCATCTCAG#(((((.(((..((((((((((.#)))))))))).)))..))))).	2414	2436	1	-23.4	0	0.00808409	0.456	0	0	-9.90581	18	22	10	3UTR
rno-miR-146a-5p	XM_006233134	Kcna2	TGAGAACTGAATTCCATGGGTT#ACCCATGGAGCCAGCATCTCAG#(((((.(((..((((((((((.#)))))))))).)))..))))).	2368	2390	1	-23.4	0	0.00808409	0.456	0	0	-9.90581	18	22	10	3UTR
rno-miR-146a-5p	XM_006256783	Wnk3	TGAGAACTGAATTCCATGGGTT#ACCTGTGGTTTTCAGGAAGCTTAA#((((..(((((..((((((((.#))))))))..)))))....)))).	6838	6862	1	-20.4	0	0.00801231	0.603	0	0	-14.5935	17	24	8	3UTR
rno-miR-146a-5p	XM_017602071	Wnk3	TGAGAACTGAATTCCATGGGTT#ACCTGTGGTTTTCAGGAAGCTTAA#((((..(((((..((((((((.#))))))))..)))))....)))).	6701	6725	1	-20.4	0	0.00801231	0.603	0	0	-14.5935	17	24	8	3UTR
rno-miR-146a-5p	NM_001130537	Zbtb39	TGAGAACTGAATTCCATGGGTT#AACCCTGGTATTTGGTTCTA#..((((((((((.(((.(((((#)))))))).)))))))))).	5130	5150	1	-20.9	1	0.00794702	0.588	0.381228	0.216591	-6.24613	18	20	10	3UTR
rno-miR-146a-5p	XM_006247232	Hoxb6	TGAGAACTGAATTCCATGGGTT#ACCCGTGGATGCAGCGCATGAATTCGTGCAACAGTTCCTCT#.((((((((...(((((((((.#)))))))))......................)))))).)).	492	533	1	-19.9	1	0.00790989	0.368	0	0	-11.2074	17	41	9	CDS
rno-miR-146a-5p	NM_053992	Nlgn2	TGAGAACTGAATTCCATGGGTT#CCCATGGAACAGTCAGGTCAAGCACGTTCTCC#.(((((((((.(((((((((..#)))))))))...)))..........)))))).	3683	3715	1	-21.2	1	0.00775751	0.471	1.08539	0.785593	-6.6181	18	32	9	3UTR
rno-miR-146a-5p	XM_006228948	Siglec10	TGAGAACTGAATTCCATGGGTT#AGCCTTTGGAAGGTGTCAGTGCTGGTCCCACAGAGTGGACCAGTTCTCAA#(((((((((...((((((((..#.)))).....)))).))))))))).	2642	2692	1	-21.7	1	0.00775279	0.456	0	0	-11.3517	17	25	9	3UTR
rno-miR-146a-5p	NM_031750	Hspb3	TGAGAACTGAATTCCATGGGTT#AGCCCGGGAATTCTTAAACTCT#.(((....(((((((.((((((#))))))))))))).....))).	646	668	1	-19.1	0	0.00774754	0.574	-0.0599331	0.217143	-13.9037	16	22	13	3UTR
rno-miR-146a-5p	NM_001108286	Ypel2	TGAGAACTGAATTCCATGGGTT#ACCTCATGGCTTTTGTTCTCT#.((((((.(((..((((((((.#))).)))))..))))))))).	1204	1225	1	-19.3	1	0.00774671	0.574	0.367118	1.11387	-10.7429	17	21	9	3UTR
rno-miR-146a-5p	NM_024395	Htr5b	TGAGAACTGAATTCCATGGGTT#ACTCCAGAAATCACACCGTAGGGCCTGGAATGTTGAGTTCTCAC#((((((((..((((((.((.((#.)).))))))))....)))))))).	1523	1567	1	-20.6	1	0.00774173	0.544	1.44138	1.35486	-6.23647	18	25	8	3UTR
rno-miR-146a-5p	XM_006234798	Mga	TGAGAACTGAATTCCATGGGTT#GCCCAAGGAATTCAT#.......((((((((.(((((.#))))).)))))))).	10568	10583	1	-18.9	0	0.00758711	0.574	0	0	-17.3433	13	15	8	3UTR
rno-miR-146a-5p	XM_006234799	Mga	TGAGAACTGAATTCCATGGGTT#GCCCAAGGAATTCAT#.......((((((((.(((((.#))))).)))))))).	9840	9855	1	-18.9	0	0.00758711	0.574	0	0	-17.3433	13	15	8	3UTR
rno-miR-146a-5p	XM_006234800	Mga	TGAGAACTGAATTCCATGGGTT#GCCCAAGGAATTCAT#.......((((((((.(((((.#))))).)))))))).	9781	9796	1	-18.9	0	0.00758711	0.574	0	0	-17.3433	13	15	8	3UTR
rno-miR-146a-5p	XM_039085062	Tenm2	TGAGAACTGAATTCCATGGGTT#AACCCAGGAAACAGTGCTCG#.(((.((((..((((.((((((#)))))))))).)))).))).	7383	7403	1	-20.3	0	0.00746617	0.426	0	0	-12.2127	17	20	10	CDS
rno-miR-146a-5p	XM_039085071	Tenm2	TGAGAACTGAATTCCATGGGTT#AACCCAGGAAACAGTGCTCG#.(((.((((..((((.((((((#)))))))))).)))).))).	7169	7189	1	-20.3	0	0.00746617	0.426	0	0	-12.2127	17	20	10	CDS
rno-miR-146a-5p	NM_032079	Dnaja2	TGAGAACTGAATTCCATGGGTT#AGCCATGGTTGTAAAGTTTTTT#.(((((((.....((((((.(.#).))))))......))))))).	1752	1774	1	-14.9	1	0.00745189	0.735	1.32985	1.46683	-13.5529	14	22	7	3UTR
rno-miR-146a-5p	NM_001006983	Abhd17a	TGAGAACTGAATTCCATGGGTT#CCAGGTACACAGTTCTCT#.((((((((....((.(((...#)))))....)))))))).	660	678	1	-17.9	1	0.00744298	0.397	1.74149	1.93572	-12.7296	13	18	8	CDS
rno-miR-146a-5p	XM_008761954	Mettl8	TGAGAACTGAATTCCATGGGTT#GACCCAGGAAGGCAGAGCA#...(..(((..((((.((((((#))))))))))..)))..).	2474	2493	1	-18.6	0	0.00743932	0.5	0	0	-16.8349	14	19	10	CDS
rno-miR-146a-5p	XM_039106365	Mettl8	TGAGAACTGAATTCCATGGGTT#GACCCAGGAAGGCAGAGCA#...(..(((..((((.((((((#))))))))))..)))..).	613	632	1	-18.6	0	0.00743932	0.5	0	0	-16.8349	14	19	10	CDS
rno-miR-146a-5p	XM_039106366	Mettl8	TGAGAACTGAATTCCATGGGTT#GACCCAGGAAGGCAGAGCA#...(..(((..((((.((((((#))))))))))..)))..).	763	782	1	-18.6	0	0.00743932	0.5	0	0	-16.8349	14	19	10	CDS
rno-miR-146a-5p	NM_134368	Smarca4	TGAGAACTGAATTCCATGGGTT#GACCTCCGCCTAGTCCCATGGACCAGCATTCTCAA#(((((((((...((((((((..#.)))))))).)))..)))))).	641	676	1	-22.3	1	0.00737065	0.426	2.13367	1.64272	-11.3517	17	22	8	CDS
rno-miR-146a-5p	XM_039090018	LOC120095902	TGAGAACTGAATTCCATGGGTT#GACCCATGGATAAAGATCTA#..(((.((....((((((((((#))))))))))...)).))).	8345	8365	1	-20	0	0.00734146	0.544	0	0	-15.3284	15	20	10	3UTR
rno-miR-146a-5p	NM_024398	Aco2	TGAGAACTGAATTCCATGGGTT#ACCCTGGAGTTCTTCTGAT#(.((((..((((((((.((((.#)))))))))))))))).).	551	570	1	-18.6	0	0.00731918	0.5	1.90166	2.1197	-8.95857	17	19	16	CDS
rno-miR-146a-5p	XM_006229065	Ap2a1	TGAGAACTGAATTCCATGGGTT#GACCCACGCTCCAGCCCACCTGTGCAGTTCTCAC#(((((((((.((....((((((#.))))))...)).))))))))).	1731	1765	1	-20.5	1	0.00731548	0.382	0	0	-8.29455	17	23	9	CDS
rno-miR-146a-5p	NM_001108456	Afg3l1	TGAGAACTGAATTCCATGGGTT#AGCCCAGGAAATTCAGTAGCTCC#.(((.((((((((((.((((((#)))))))))).))))))..))).	293	316	1	-21.4	0	0.00729859	0.544	0.421465	0.853166	-8.14541	19	23	10	CDS
rno-miR-146a-5p	NM_013022	Rock2	TGAGAACTGAATTCCATGGGTT#TCCGTGGGTGGTTCAGCTCTTT#.((((.((((((((((((((..#))))))))..)))))).)))).	494	516	1	-20.2	0	0.00728452	0.544	2.20376	2.34901	-5.69428	18	22	8	CDS
rno-miR-146a-5p	NM_022188	Robo1	TGAGAACTGAATTCCATGGGTT#AACCCTAGGGATCCCAGTTCTTC#.((((((((.(((((..(((((#)))))..)))))..)))))))).	4788	4811	1	-21.4	1	0.0072801	0.529	1.94254	1.59027	-5.26888	18	23	8	CDS
rno-miR-146a-5p	XM_008768533	Robo1	TGAGAACTGAATTCCATGGGTT#AACCCTAGGGATCCCAGTTCTTC#.((((((((.(((((..(((((#)))))..)))))..)))))))).	5224	5247	1	-21.4	1	0.0072801	0.529	0	0	-5.26888	18	23	8	CDS
rno-miR-146a-5p	XM_008768534	Robo1	TGAGAACTGAATTCCATGGGTT#AACCCTAGGGATCCCAGTTCTTC#.((((((((.(((((..(((((#)))))..)))))..)))))))).	5197	5220	1	-21.4	1	0.0072801	0.529	0	0	-5.26888	18	23	8	CDS
rno-miR-146a-5p	XM_017598060	Robo1	TGAGAACTGAATTCCATGGGTT#AACCCTAGGGATCCCAGTTCTTC#.((((((((.(((((..(((((#)))))..)))))..)))))))).	5109	5132	1	-21.4	1	0.0072801	0.529	0	0	-5.26888	18	23	8	CDS
rno-miR-146a-5p	XM_017598063	Robo1	TGAGAACTGAATTCCATGGGTT#AACCCTAGGGATCCCAGTTCTTC#.((((((((.(((((..(((((#)))))..)))))..)))))))).	5215	5238	1	-21.4	1	0.0072801	0.529	0	0	-5.26888	18	23	8	CDS
rno-miR-146a-5p	NM_001108005	Mast2	TGAGAACTGAATTCCATGGGTT#AGCCCTCGGAATTTCTCTCC#.((((...(((((((..(((((#)))))..))))))).)))).	456	476	1	-18.2	0	0.00722563	0.5	0.348679	0.385276	-9.78465	16	20	7	CDS
rno-miR-146a-5p	NM_001012005	Nid2	TGAGAACTGAATTCCATGGGTT#ACCTACGCCCTCTTTCTCTATCCTGCCAATGGTCTTCAGTTCTTT#.((((((((((..((((.(((.#.))).))))..)))))))))).	602	647	1	-22.5	1	0.00719059	0.515	1.40251	1.40904	-8.42926	17	22	10	CDS
rno-miR-146a-5p	XM_006240358	Lin52	TGAGAACTGAATTCCATGGGTT#GCCCATGGGTAAAATCAATTAGACCTAGTCTCTCAC#(((((((((...(((((((((.#)))))))))................)))).))))).	1662	1698	1	-19.1	1	0.00717577	0.574	0	0	-11.3517	18	36	9	3UTR
rno-miR-146a-5p	NM_001007799	Cir1	TGAGAACTGAATTCCATGGGTT#GACCCTGAAGTTGAGTTCTTAA#((((((((.((((.((.(((((#))))))).)))).)))))))).	618	640	1	-20.6	1	0.00716124	0.529	0.640163	1.41254	-5.8508	19	22	8	CDS
rno-miR-146a-5p	NM_001347532	Adnp	TGAGAACTGAATTCCATGGGTT#AACCTCAAGAAAAAAAGAGCATGGGACTCCCACCAAGAATCAGTTCTCT#.((((((((.((((..((((..#.))))....)))))))))))).	2424	2473	1	-19.8	1	0.00703431	0.544	0	0	-6.00433	16	22	12	CDS
rno-miR-146a-5p	XM_008767898	Dnah2	TGAGAACTGAATTCCATGGGTT#CCCATGTACCAGTTCTCC#.((((((((.....((((((..#))))))...)))))))).	12861	12879	1	-19.9	1	0.00700105	0.471	0	0	-13.3534	14	18	8	CDS
rno-miR-146a-5p	XM_006250400	Enah	TGAGAACTGAATTCCATGGGTT#AGCCCTTAGGAATTCAGTG#.....((((((((((..(((((#)))))...)))))))))).	10449	10468	1	-20.8	0	0.00694941	0.603	0	0	-13.8986	15	19	10	3UTR
rno-miR-146a-5p	XM_039090929	Enah	TGAGAACTGAATTCCATGGGTT#AGCCCTTAGGAATTCAGTG#.....((((((((((..(((((#)))))...)))))))))).	10799	10818	1	-20.8	0	0.00694941	0.603	0	0	-13.8986	15	19	10	3UTR
rno-miR-146a-5p	NM_001109883	Abcf1	TGAGAACTGAATTCCATGGGTT#GGCCCTGGGTGAAGTCATGGTCAACCGACCTCGGGATTGAGTTCTTC#.(((((((.((((((..(((((#.))))).)))))).))))))).	2513	2560	1	-21.4	1	0.00687053	0.471	1.11161	1.06974	-5.08276	18	22	7	CDS
rno-miR-146a-5p	NM_001135033	Trim16	TGAGAACTGAATTCCATGGGTT#ACTTGTGGAATTCAGTGTGGCTTTTCAA#(((((((((((((((((((((.#))))))))))))))))......))))).	3660	3688	1	-22.2	1	0.00686173	0.632	0.166619	0.261558	-3.93757	21	28	16	3UTR
rno-miR-146a-5p	NM_019206	Stk10	TGAGAACTGAATTCCATGGGTT#AGCCCCAGGAAGGCGATAGTTCTCAG#(((((((((..((((..(((((#)))))..))))..)...)))))))).	4486	4512	1	-21.7	1	0.00684817	0.426	0.444645	0.0699399	-8.2379	18	26	8	3UTR
rno-miR-146a-5p	XM_039085736	Stk10	TGAGAACTGAATTCCATGGGTT#AGCCCCAGGAAGGCGATAGTTCTCAG#(((((((((..((((..(((((#)))))..))))..)...)))))))).	4506	4532	1	-21.7	1	0.00684817	0.426	0	0	-8.2379	18	26	8	3UTR
rno-miR-146a-5p	NM_001014792	Kpna3	TGAGAACTGAATTCCATGGGTT#GACCCCCCACCGCCTATGGAGACAGTTCA#...((((((..((((((((((.#.)))))))))).)))))).	700	729	1	-22.6	0	0.00681695	0.5	2.17212	2.30702	-10.5818	16	19	10	CDS
rno-miR-146a-5p	XM_006252127	Kpna3	TGAGAACTGAATTCCATGGGTT#GACCCCCCACCGCCTATGGAGACAGTTCA#...((((((..((((((((((.#.)))))))))).)))))).	747	776	1	-22.6	0	0.00681695	0.5	0	0	-10.5818	16	19	10	CDS
rno-miR-146a-5p	XM_039093503	Kpna3	TGAGAACTGAATTCCATGGGTT#GACCCCCCACCGCCTATGGAGACAGTTCA#...((((((..((((((((((.#.)))))))))).)))))).	647	676	1	-22.6	0	0.00681695	0.5	0	0	-10.5818	16	19	10	CDS
rno-miR-146a-5p	NM_172243	Ppif	TGAGAACTGAATTCCATGGGTT#TCCATGGCAAACGCAGGCCCCAACACCAATGGCTCTCAGTTCTTT#.(((((((((...((((.(((.#.))).))))...))))))))).	446	491	1	-19.6	1	0.00676782	0.5	1.89995	1.89371	-11.254	16	22	9	CDS
rno-miR-146a-5p	NM_001104633	Sema3d	TGAGAACTGAATTCCATGGGTT#CCCATGGAGTCTCAC#(((((......(((((((((..#)))))))))))))).	2973	2988	1	-18.3	0	0.00668335	0.574	1.87567	1.67155	-14.8195	14	15	14	3UTR
rno-miR-146a-5p	NM_001006979	Matn1	TGAGAACTGAATTCCATGGGTT#GACCCGTGGAGTTTGAGAAGGTGAAGGTGTTCC#...(((((((((((((((((((#))))))))))))))).............)))).	187	220	1	-20.8	0	0.00662604	0.485	1.91679	1.40995	-6.51454	19	33	15	CDS
rno-miR-146a-5p	NM_001000283	Olr441	TGAGAACTGAATTCCATGGGTT#CTCATGGGATCAATAAATTCCTCAGTACACACAGGATTTACGTTCTCAC#(((((((((.((((((((((..#)))))))))))).............................))))))).	447	496	1	-18.9	1	0.00660757	0.603	0.348077	0.74925	-5.18008	19	49	12	CDS
rno-miR-146a-5p	NM_001108041	Acot3	TGAGAACTGAATTCCATGGGTT#GGCCCACACTACTCCTATAGGACCCAAGTTCAGTTCCCAG#((.((((((((((...((((((#.)))))))))))))))).)).	1709	1749	1	-20.9	0	0.00654675	0.485	0.4081	0.117709	-7.32045	18	21	16	3UTR
rno-miR-146a-5p	XM_006254534	Matr3	TGAGAACTGAATTCCATGGGTT#AACCCAGTGCTTGATTATGACCATGGAAGTCGTTCTCAA#(((((((.((.((((((((...#.)))))))).))))))))).	880	919	1	-24.2	1	0.00649065	0.618	0	0	-9.07598	17	20	9	CDS
rno-miR-146a-5p	NM_001108339	Gatc	TGAGAACTGAATTCCATGGGTT#AGCCCTGGGCCAGTTTTCAT#(((((((((...((((.(((((#))))))))).))))))))).	1095	1115	1	-21.1	1	0.00646326	0.559	0	0	-11.3517	18	20	9	3UTR
rno-miR-146a-5p	NM_001130543	Rrm2b	TGAGAACTGAATTCCATGGGTT#GCAGGTTCCAGAGGCTCGCTGCTTCTATGGCTTTCAGATTCTCAT#(((((((((((..(((((((..#.)))))))..))))).)))))).	475	520	1	-22.2	1	0.00636435	0.544	1.6051	1.91275	-8.57351	18	23	7	CDS
rno-miR-146a-5p	XM_039078801	Rrm2b	TGAGAACTGAATTCCATGGGTT#GCAGGTTCCAGAGGCTCGCTGCTTCTATGGCTTTCAGATTCTCAT#(((((((((((..(((((((..#.)))))))..))))).)))))).	440	485	1	-22.2	1	0.00636435	0.544	0	0	-8.57351	18	23	7	CDS
rno-miR-146a-5p	XM_039102105	Homer1	TGAGAACTGAATTCCATGGGTT#AGCCCATGGAATGGGTTATAATAAGTCTCAG#((((((((..((((((((((((#)))))))))))).))).........))))).	5462	5493	1	-23.3	1	0.00635743	0.662	0	0	-6.23647	20	31	12	3UTR
rno-miR-146a-5p	NM_001105819	Rhbdl3	TGAGAACTGAATTCCATGGGTT#TATGGAGTTCGGG#......((((((((((((....#)))))))))))).	1198	1211	1	-16.5	0	0.00635737	0.441	1.76837	1.47644	-15.5666	12	13	12	CDS
rno-miR-146a-5p	XM_003750170	Togaram1	TGAGAACTGAATTCCATGGGTT#TCCATGGCACACTTCAAGTTCTCC#.((((((((((..(((((((..#))))))).....)))).)))))).	1444	1468	1	-19.3	1	0.00632876	0.529	0	0	-8.42926	17	24	7	CDS
rno-miR-146a-5p	XM_006240139	Togaram1	TGAGAACTGAATTCCATGGGTT#TCCATGGCACACTTCAAGTTCTCC#.((((((((((..(((((((..#))))))).....)))).)))))).	1444	1468	1	-19.3	1	0.00632876	0.529	0	0	-8.42926	17	24	7	CDS
rno-miR-146a-5p	XM_234236	Togaram1	TGAGAACTGAATTCCATGGGTT#TCCATGGCACACTTCAAGTTCTCC#.((((((((((..(((((((..#))))))).....)))).)))))).	1444	1468	1	-19.3	1	0.00632876	0.529	0	0	-8.42926	17	24	7	CDS
rno-miR-146a-5p	XM_039093098	Cnih1	TGAGAACTGAATTCCATGGGTT#AGCCTATGGAATCTGATCAGTTACTTT#.(((((((((((((((((((((#))))))))))))....)))))).))).	706	733	1	-22.9	1	0.00629652	0.721	0	0	-3.79332	21	27	12	3UTR
rno-miR-146a-5p	XM_576539	Amer3	TGAGAACTGAATTCCATGGGTT#ACCCGTCTCAGTTCTCAG#((((((((((.....((((((.#)))))).)))))))))).	2599	2617	1	-20.3	1	0.00629015	0.456	0	0	-12.9906	16	18	10	CDS
rno-miR-146a-5p	NM_001034935	Ppef1	TGAGAACTGAATTCCATGGGTT#AACCCTCTTTACCAAAGGGTGAATGCTATGGAATTCAGTGCCTTCAG#((((.((((((((((((((...#.))))))))))))))...)))).	1488	1535	1	-22.7	0	0.00623781	0.618	0.751059	0.726413	-8.05661	18	23	14	CDS
rno-miR-146a-5p	NM_001134792	RGD1564614	TGAGAACTGAATTCCATGGGTT#GGCCCATGGAAACTTTCAGA#......((((((((((((((((#)))))))))))...))))).	2656	2676	1	-21.3	0	0.00617458	0.75	-0.456482	-0.0657848	-15.5666	16	20	11	3UTR
rno-miR-146a-5p	XM_039087157	Tpcr12	TGAGAACTGAATTCCATGGGTT#ACCTATGGTGGTCAGTAGACAACCTGCAGTCATCTTTCTCT#.(((((((((...((((((((.#))))))))...)))))....................)))).	770	811	1	-19.5	1	0.00613669	0.529	0	0	-11.254	17	41	8	5UTR
rno-miR-146a-5p	NM_001191586	Bcor	TGAGAACTGAATTCCATGGGTT#AACTTATGGAGAAGTTTTTAA#((((((((...(((((((((((#))))))))))).)))))))).	4992	5013	1	-17.6	1	0.00612809	0.603	2.15996	1.85905	-9.06125	19	21	11	CDS
rno-miR-146a-5p	XM_039082699	Itga9	TGAGAACTGAATTCCATGGGTT#CCCATGGATTCTGTTACCTCAT#(((((((.(((.((((((((..#))))))))))).)))..)))).	751	773	1	-20.8	1	0.00612582	0.471	0	0	-9.59801	18	22	11	CDS
rno-miR-146a-5p	XM_039082700	Itga9	TGAGAACTGAATTCCATGGGTT#CCCATGGATTCTGTTACCTCAT#(((((((.(((.((((((((..#))))))))))).)))..)))).	2557	2579	1	-20.8	1	0.00612582	0.471	0	0	-9.59801	18	22	11	CDS
rno-miR-146a-5p	XM_039096529	Ankhd1	TGAGAACTGAATTCCATGGGTT#CCCACAGTTGTCAGTTCTCAG#((((((((((...(..((((..#))))..)...)))))))))).	4851	4872	1	-21.2	1	0.0061015	0.5	0	0	-12.3668	15	21	10	CDS
rno-miR-146a-5p	NM_001107205	Abcg3l3	TGAGAACTGAATTCCATGGGTT#CTCATGGATTCAGTACCTTAG#((((.((((((.((((((((..#))))))))))))))..)))).	1719	1740	1	-19.8	0	0.00610105	0.544	0.885273	0.398973	-11.4034	18	21	14	CDS
rno-miR-146a-5p	XM_039085464	Clcf1	TGAGAACTGAATTCCATGGGTT#GGCCCATGGTTTCTGATCTCT#.((((.(.(((..(((((((((#))))))))).))).).)))).	1213	1234	1	-21.2	0	0.00602897	0.412	0	0	-12.6439	17	21	9	CDS
rno-miR-146a-5p	NM_001191555	Rab11fip1	TGAGAACTGAATTCCATGGGTT#GCCCGTGGAGAATCAGTGTGACCTCAG#((((.(((((.((((((((((.#))))))))))..))))).....)))).	2851	2878	1	-22.7	0	0.00602755	0.426	-0.872253	-0.119487	-10.8814	19	27	10	CDS
rno-miR-146a-5p	NM_053456	Plcl1	TGAGAACTGAATTCCATGGGTT#GATTCATGGAATTCCAGC#......((((((((((((((((#)))))))))))))).)).	2729	2747	1	-17.9	0	0.00602371	0.559	2.1548	2.0779	-15.5666	16	18	14	CDS
rno-miR-146a-5p	NM_053842	Mapk1	TGAGAACTGAATTCCATGGGTT#CCCAGGAACCAGATCTCAG#(((((.(((..((((.((((..#)))))))).))).))))).	3406	3425	1	-19.4	0	0.00601817	0.5	0.107025	0.51538	-10.1389	16	19	8	3UTR
rno-miR-146a-5p	XM_344780	Zcchc14	TGAGAACTGAATTCCATGGGTT#GGCCCCGCCTCCAGGTCAGTTCTCAC#((((((((((...((.((((..#.)))))))))))))))).	6489	6515	1	-19.7	1	0.00596383	0.397	0	0	-11.6313	16	18	16	3UTR
rno-miR-146a-5p	NM_057196	Baiap2	TGAGAACTGAATTCCATGGGTT#GACCATCATGGAGCAGTTCA#...((((((..(((((((((((#))))..))))))))))))).	114	134	1	-18.9	0	0.00595256	0.485	2.5076	1.48883	-10.5818	17	20	13	CDS
rno-miR-146a-5p	NM_001107425	Nfat5	TGAGAACTGAATTCCATGGGTT#CCCGGGAAAAAACAGTTCTCT#.((((((((..((((.((((..#))))))))....)))))))).	6412	6433	1	-20.9	1	0.00590577	0.603	0.793216	0.887766	-8.09365	16	21	8	3UTR
rno-miR-146a-5p	XM_003751872	Nfat5	TGAGAACTGAATTCCATGGGTT#CCCGGGAAAAAACAGTTCTCT#.((((((((..((((.((((..#))))))))....)))))))).	6359	6380	1	-20.9	1	0.00590577	0.603	0	0	-8.09365	16	21	8	3UTR
rno-miR-146a-5p	XM_017601291	Nfat5	TGAGAACTGAATTCCATGGGTT#CCCGGGAAAAAACAGTTCTCT#.((((((((..((((.((((..#))))))))....)))))))).	5543	5564	1	-20.9	1	0.00590577	0.603	0	0	-8.09365	16	21	8	3UTR
rno-miR-146a-5p	NM_001009405	Arhgap29	TGAGAACTGAATTCCATGGGTT#CCCACGGATTTCAGTTTTTC#.((((((((((.(((.((((..#)))).))).)))))))))).	84	104	1	-22.3	1	0.00587058	0.485	0.978431	0.681277	-7.37318	17	20	10	5UTR
rno-miR-146a-5p	NM_053019	Avpr1a	TGAGAACTGAATTCCATGGGTT#AACCCGTGGATATACATGTTTTTCAGTGGCCATCTCC#.((((((((((.((((((((((#))))))))))...........)))))).....)))).	1288	1325	1	-21	1	0.00586059	0.5	-0.0665889	0.142787	-7.14013	20	37	10	CDS
rno-miR-146a-5p	XM_039109213	Zfp483	TGAGAACTGAATTCCATGGGTT#GACCTTCTGAAGGCTAAGTTTCTTTACCAGTGGAGTTGAAGAGATGAAGACTTCTCAGTTCTCT#.((((((((((((((((.(((.#.))).)))))))..................))))))))).	2954	3018	1	-22.7	1	0.0058391	0.588	0	0	-3.79332	19	40	9	3UTR
rno-miR-146a-5p	XM_017594448	Ttc6	TGAGAACTGAATTCCATGGGTT#GATCCTCGGAAATGGGTTCTCGA#((((((((.(.((((..(((((#)))))..)))).).)))))))).	2644	2667	1	-21.3	1	0.00577539	0.603	0	0	-8.05179	18	23	8	CDS
rno-miR-146a-5p	XM_008767660	Zfp354a	TGAGAACTGAATTCCATGGGTT#TCCATGGGATTCCTGTTTA#...((((.((((((((((((..#))))))))))))..)))).	358	377	1	-20	0	0.00577059	0.515	0	0	-8.82818	16	19	12	CDS
rno-miR-146a-5p	NM_133396	Tesk2	TGAGAACTGAATTCCATGGGTT#GAGCTTTGGCCCCCATGGAACACAGTG#.....((((..(((((((((..#.)))))))))..)))).	2303	2330	1	-20.5	0	0.00574076	0.529	0.553258	0.421606	-17.7329	13	17	9	3UTR
rno-miR-146a-5p	NM_024485	Chrna1	TGAGAACTGAATTCCATGGGTT#ACCTATGGGCTTTCATTCTCC#.(((((.((((.(((((((((.#)))))))))..))))))))).	1194	1215	1	-20.4	0	0.00573302	0.426	2.56651	1.90282	-8.68381	18	21	9	CDS
rno-miR-146a-5p	XM_039100316	LOC108349244	TGAGAACTGAATTCCATGGGTT#GCCCAGGGATTCATCTCAC#(((((..((((((((.(((((.#)))))))))))))))))).	1390	1409	1	-22.8	0	0.00571795	0.515	0	0	-7.61527	18	19	18	CDS
rno-miR-146a-5p	NM_013217	Afdn	TGAGAACTGAATTCCATGGGTT#GACCCATGGAAACGAGA#......((...(((((((((((#)))))))))))...)).	4879	4896	1	-18.2	0	0.00569368	0.441	2.0792	1.97203	-20.6902	13	17	11	CDS
rno-miR-146a-5p	NM_001109226	Prrt4	TGAGAACTGAATTCCATGGGTT#CCCACCACTCCTGGAAAGGAAGTTCTCAA#((((((((...(((((.((((.#.)))).)))))....)))))))).	986	1015	1	-20.7	1	0.00567083	0.426	1.06527	0.802646	-9.06125	17	24	8	CDS
rno-miR-146a-5p	XM_006233239	Arhgap29	TGAGAACTGAATTCCATGGGTT#GATACAGGATGGAGCCCCACGGATTTCAGTTTTTC#.((((((((((.(((.((((..#.)))).))).)))))))))).	129	164	1	-22.7	1	0.00562911	0.529	0	0	-7.37318	17	21	10	5UTR
rno-miR-146a-5p	XM_006256432	Pla2g12b	TGAGAACTGAATTCCATGGGTT#GGCCGAGAACCATGTGCCTGGAAATTCAGTTCTTAG#(((((((((((((((..((((.#.)))))))).))))))))))).	1958	1994	1	-22.1	1	0.00555938	0.485	0	0	-4.17062	19	22	11	3UTR
rno-miR-146a-5p	NM_001173371	Zfp609	TGAGAACTGAATTCCATGGGTT#GCCTGTGGGATGTTTTCTAGTTCTCT#.((((((((((((((((((((.#)))))))))))....)).))))))).	5683	5709	1	-23.2	1	0.00555634	0.5	1.89291	1.55267	-3.79332	20	26	11	3UTR
rno-miR-146a-5p	NM_138900	C1s	TGAGAACTGAATTCCATGGGTT#ATTTTGTCATGGAATTCAGGCATCAA#(((...(((((((((((((...#.)))))))))))))...))).	2856	2882	1	-22.3	0	0.00555113	0.588	0.416127	0.39719	-12.9896	16	21	13	3UTR
rno-miR-146a-5p	NM_001000260	Olr376	TGAGAACTGAATTCCATGGGTT#ATCCATGGAAGGAAAGTGGAAAGCCTTCTCTACATGTGGTTCTCAC#(((((((((..((((((((((.#))))))))))..........................))))))))).	686	732	1	-21.3	1	0.00552992	0.559	0.23843	0.771519	-8.00486	19	46	10	CDS
rno-miR-146a-5p	XM_006242635	Zfp653	TGAGAACTGAATTCCATGGGTT#GCCCGTGGACCTCAGCCTCT#.(((..((((..(((((((((.#)))))))))..)))).))).	2460	2480	1	-22.8	0	0.0054951	0.515	0	0	-15.9849	16	20	9	3UTR
rno-miR-146a-5p	XM_006241337	Caps2	TGAGAACTGAATTCCATGGGTT#GGAATTTAGTTTTCAA#(((((((((((((((.......#))))))))))))))).	2327	2343	1	-20.4	1	0.00549083	0.618	0	0	-4.17062	15	16	15	CDS
rno-miR-146a-5p	XM_039079681	Caps2	TGAGAACTGAATTCCATGGGTT#GGAATTTAGTTTTCAA#(((((((((((((((.......#))))))))))))))).	2232	2248	1	-20.4	1	0.00549083	0.618	0	0	-4.17062	15	16	15	CDS
rno-miR-146a-5p	XM_039079682	Caps2	TGAGAACTGAATTCCATGGGTT#GGAATTTAGTTTTCAA#(((((((((((((((.......#))))))))))))))).	2199	2215	1	-20.4	1	0.00549083	0.618	0	0	-4.17062	15	16	15	CDS
rno-miR-146a-5p	XM_001068528	Fam155b	TGAGAACTGAATTCCATGGGTT#AGCCTATGGAGCCCTTTTCTCT#.(((((..(..(((((((((((#)))))))))))..)..))))).	4070	4092	1	-20.3	0	0.0054438	0.515	0	0	-11.7179	17	22	11	3UTR
rno-miR-146a-5p	NM_001107295	Oxnad1	TGAGAACTGAATTCCATGGGTT#CCCAGGAGTTTCAGTGGTTGGTGGGTTTTCAA#(((((((((((((((.((((..#)))))))))))............)))))))).	506	538	1	-19.2	1	0.00543116	0.515	1.18025	1.13186	-4.17062	19	32	11	CDS
rno-miR-146a-5p	XM_006252624	Oxnad1	TGAGAACTGAATTCCATGGGTT#CCCAGGAGTTTCAGTGGTTGGTGGGTTTTCAA#(((((((((((((((.((((..#)))))))))))............)))))))).	799	831	1	-19.2	1	0.00543116	0.515	0	0	-4.17062	19	32	11	CDS
rno-miR-146a-5p	NM_012694	Slc6a3	TGAGAACTGAATTCCATGGGTT#CATGGAGTCAGTGATCAC#(((..((((.((((((((....#))))))))))))..))).	1362	1380	1	-19.2	0	0.00542466	0.441	1.4191	1.184	-12.3311	15	18	12	CDS
rno-miR-146a-5p	NM_053965	Slc25a20	TGAGAACTGAATTCCATGGGTT#CCCATGAGAGCACTCAGTTTTA#..((((((((.(((((((((..#)))))).)))...)))))))).	1701	1723	1	-19.4	1	0.00538724	0.676	0.975041	0.624931	-7.78178	17	22	8	3UTR
rno-miR-146a-5p	XM_575397	Wnt2	TGAGAACTGAATTCCATGGGTT#AACCCCTTCTACTCTGAAATCAATGTCTTATCTCAAGAGTTCAGTACTCTCAA#((((((((((((((..((((..#.)))).)))))))))..))))).	4233	4286	1	-18.9	1	0.00534401	0.574	0	0	-4.90607	18	23	9	3UTR
rno-miR-146a-5p	NM_001013036	Gmpr2	TGAGAACTGAATTCCATGGGTT#AGCTCTTCTATGGAATGAGTTCTGAA#(.((((((..((((((((((..#.)))))))))).)))))).).	872	898	1	-19.6	1	0.00533094	0.588	2.47484	1.63347	-7.40015	17	21	10	CDS
rno-miR-146a-5p	NM_012741	Kng2l1	TGAGAACTGAATTCCATGGGTT#GCCCATGGAAGCCAGTTA#....(((((..((((((((((.#))))))))))..))))).	1851	1869	1	-23.8	0	0.00532091	0.485	0	0	-13.6138	15	18	10	CDS
rno-miR-146a-5p	NM_030585	Rabep2	TGAGAACTGAATTCCATGGGTT#AACCAAAGCTTTCAGGCTGCCATGCTCCCTCATGGATCCAGTTCTCC#.((((((((...((((((((..#.))))))))..)))))))).	1910	1957	1	-23.5	1	0.00531166	0.382	0.988306	0.321105	-11.2074	16	20	8	3UTR
rno-miR-146a-5p	NM_001354556	Sertm2	TGAGAACTGAATTCCATGGGTT#ACCCTCTTTCATCACAACAACCCCTATGGGATCCAGATCTTAA#(((((.(((.((((((((((..#.)))))))))).))).))))).	3496	3539	1	-22.6	0	0.0052538	0.574	0	0	-7.08104	18	22	10	3UTR
rno-miR-146a-5p	NM_001108728	Slc39a5	TGAGAACTGAATTCCATGGGTT#AATCCAGTGAATTGTGCTCAGTTCTCT#.(((((((((((((..((((((#))))))..)))).....))))))))).	2443	2470	1	-20.4	1	0.00521105	0.588	0.32154	0.492229	-4.76182	19	27	9	3UTR
rno-miR-146a-5p	NM_001107799	Fitm2	TGAGAACTGAATTCCATGGGTT#GACCAGGTTTAACATTAAATTGGCAACACATGGGAACTCTCAGTTGCTCAG#((((((((((.(((((((.(((#.))).)))))))....)))))).)))).	3631	3682	1	-19.7	1	0.00520083	0.588	1.37482	1.55757	-6.76235	20	28	7	3UTR
rno-miR-146a-5p	NM_001271598	Dhrs7c	TGAGAACTGAATTCCATGGGTT#GGCCTGTGGAGTGAAGGAGAAGCTCAG#((((..((..((((((((((((#))))))))))))..))......)))).	1042	1069	1	-20.1	0	0.00519414	0.456	1.31172	0.717829	-12.2565	18	27	12	CDS
rno-miR-146a-5p	XM_039088824	Nsun3	TGAGAACTGAATTCCATGGGTT#ACCCATGGATATTAGTGGGATAGCAAGGACTTTCTCC#.(((((((((..(((((((((.#)))))))))..)))))................)))).	980	1017	1	-20.9	1	0.0051939	0.544	0	0	-9.9649	18	37	9	CDS
rno-miR-146a-5p	NM_001100572	Iars1	TGAGAACTGAATTCCATGGGTT#GCTCAGGCTTTAGTTCTCT#.((((((((((..((.(((((.#))))))).)))))))))).	3108	3127	1	-18.8	1	0.00516601	0.544	0.497794	2.07113	-8.66231	17	19	10	CDS
rno-miR-146a-5p	XM_006240086	Hectd1	TGAGAACTGAATTCCATGGGTT#CCCGTGGAGAGTCTCTGATGGAGTGGGCTGAGAATGTCATGCAAATACACGCAGACCGGAAGTCAGTTCTCGA#((((((((((.((((...((((#.)))))))).)))))))))).	6559	6632	1	-22.3	1	0.00515039	0.544	0	0	-6.9954	18	21	10	CDS
rno-miR-146a-5p	XM_017594442	Hectd1	TGAGAACTGAATTCCATGGGTT#CCCGTGGAGAGTCTCTGATGGAGTGGGCTGAGAATGTCATGCAAATACACGCAGACCGGAAGTCAGTTCTCGA#((((((((((.((((...((((#.)))))))).)))))))))).	6376	6449	1	-22.3	1	0.00515039	0.544	0	0	-6.9954	18	21	10	CDS
rno-miR-146a-5p	NM_001000960	Olr1292	TGAGAACTGAATTCCATGGGTT#GGATTCAGTTCTGCAA#((((((((((((((........#)))))))))))).)).	502	518	1	-16.7	1	0.00513611	0.662	0.431905	0.298053	-4.90607	14	16	12	CDS
rno-miR-146a-5p	XM_039099326	Dnah8	TGAGAACTGAATTCCATGGGTT#GGAACGCTCAGTTCTCAA#((((((((((.((((.......#))))...)))))))))).	13952	13970	1	-19.5	1	0.00513188	0.5	0	0	-6.9954	14	18	10	CDS
rno-miR-146a-5p	XM_039084090	C2cd6	TGAGAACTGAATTCCATGGGTT#GTGGAATTTATGTTCTCC#.((((((((((((((((.....#)))))))))).)))))).	889	907	1	-19.6	1	0.00510815	0.574	0	0	-3.79332	16	18	10	CDS
rno-miR-146a-5p	NM_001014153	Prmt7	TGAGAACTGAATTCCATGGGTT#GACATCACCATGGAGTTTAGGCTTG#.(((..(((((((((((((...#.))))))))))))).))).	2215	2240	1	-21.7	0	0.00509099	0.5	1.32765	0.299934	-9.81332	16	19	13	CDS
rno-miR-146a-5p	NM_001009275	Eci3	TGAGAACTGAATTCCATGGGTT#AGCTTTCACCAAATGGAATGAGAGTTTTCAA#((((((((..(((((((.(((.#.)))..)))))))...)))))))).	861	892	1	-20.2	1	0.00508654	0.632	0.147012	0.740431	-6.23647	18	25	8	CDS
rno-miR-146a-5p	XM_008768072	Ints2	TGAGAACTGAATTCCATGGGTT#TCCATTGGGCACACTTTAAGAAACTTGTCCCTGGTTCATGTTCTCAG#(((((((((((..(((.(((..#.)))))))))).))))))).	4237	4284	1	-19.7	1	0.00502226	0.529	0	0	-8.57351	17	20	10	3UTR
rno-miR-146a-5p	XM_006238263	Rgs3	TGAGAACTGAATTCCATGGGTT#GGAAGAACAGTTCTCAA#(((((((((..((((.......#))))...))))))))).	4566	4583	1	-18.6	1	0.00501153	0.529	0	0	-8.2379	13	17	9	3UTR
rno-miR-146a-5p	NM_001024775	Zfp110	TGAGAACTGAATTCCATGGGTT#GGCCTGTGGGAAAGCCTTTGTTCAGAGCTCT#.(((..((((((((((((((((#)))))))))).........))))))..))).	2322	2353	1	-20.5	0	0.00501136	0.544	0	0	-9.81332	19	31	10	CDS
rno-miR-146a-5p	NM_001127495	Rgs20	TGAGAACTGAATTCCATGGGTT#TCCACGGAAAGTTCTCGA#((((((((...((((.((((..#)))).)))))))))))).	1303	1321	1	-17.9	1	0.00497571	0.588	-0.23735	0.119032	-9.29429	16	18	12	3UTR
rno-miR-146a-5p	XM_006257108	LOC102551431	TGAGAACTGAATTCCATGGGTT#GACCCAGGAAGAAGTTCA#...(((((...((((.((((((#))))))))))..))))).	80	98	1	-19.8	0	0.00496908	0.559	0	0	-11.8713	15	18	10	CDS
rno-miR-146a-5p	XM_003749993	Lrp8	TGAGAACTGAATTCCATGGGTT#GCCCTGAGGATGGGCCCGCCCACTTCGTGCCTCATGGAGTTCAGTCCTATGCACTACTCTCT#.((((((((((((((((((((.#.))).)))))))))))))............)))).	3045	3107	1	-25.9	1	0.00496405	0.515	0	0	-3.79332	20	35	13	CDS
rno-miR-146a-5p	XM_006238571	Lrp8	TGAGAACTGAATTCCATGGGTT#GCCCTGAGGATGGGCCCGCCCACTTCGTGCCTCATGGAGTTCAGTCCTATGCACTACTCTCT#.((((((((((((((((((((.#.))).)))))))))))))............)))).	3169	3231	1	-25.9	1	0.00496405	0.515	0	0	-3.79332	20	35	13	CDS
rno-miR-146a-5p	XM_006238574	Lrp8	TGAGAACTGAATTCCATGGGTT#GCCCTGAGGATGGGCCCGCCCACTTCGTGCCTCATGGAGTTCAGTCCTATGCACTACTCTCT#.((((((((((((((((((((.#.))).)))))))))))))............)))).	2482	2544	1	-25.9	1	0.00496405	0.515	0	0	-3.79332	20	35	13	CDS
rno-miR-146a-5p	XM_039111150	Lrp8	TGAGAACTGAATTCCATGGGTT#GCCCTGAGGATGGGCCCGCCCACTTCGTGCCTCATGGAGTTCAGTCCTATGCACTACTCTCT#.((((((((((((((((((((.#.))).)))))))))))))............)))).	3087	3149	1	-25.9	1	0.00496405	0.515	0	0	-3.79332	20	35	13	CDS
rno-miR-146a-5p	XM_039111153	Lrp8	TGAGAACTGAATTCCATGGGTT#GCCCTGAGGATGGGCCCGCCCACTTCGTGCCTCATGGAGTTCAGTCCTATGCACTACTCTCT#.((((((((((((((((((((.#.))).)))))))))))))............)))).	2909	2971	1	-25.9	1	0.00496405	0.515	0	0	-3.79332	20	35	13	CDS
rno-miR-146a-5p	XM_039111158	Lrp8	TGAGAACTGAATTCCATGGGTT#GCCCTGAGGATGGGCCCGCCCACTTCGTGCCTCATGGAGTTCAGTCCTATGCACTACTCTCT#.((((((((((((((((((((.#.))).)))))))))))))............)))).	2661	2723	1	-25.9	1	0.00496405	0.515	0	0	-3.79332	20	35	13	CDS
rno-miR-146a-5p	XM_342877	Lrp8	TGAGAACTGAATTCCATGGGTT#GCCCTGAGGATGGGCCCGCCCACTTCGTGCCTCATGGAGTTCAGTCCTATGCACTACTCTCT#.((((((((((((((((((((.#.))).)))))))))))))............)))).	2788	2850	1	-25.9	1	0.00496405	0.515	0	0	-3.79332	20	35	13	CDS
rno-miR-146a-5p	XM_039111504	Zyg11b	TGAGAACTGAATTCCATGGGTT#GCCTGTGGGATGGTTTTCT#.(((((((..(((((((((((.#)))))))))))))))))).	5186	5205	1	-20.7	1	0.00496232	0.588	0	0	-6.09222	18	19	18	3UTR
rno-miR-146a-5p	NM_001025672	Pspc1	TGAGAACTGAATTCCATGGGTT#AACCCATGGAGCAGTTTG#...((((((..(((((((((((#))))))))))))))))).	834	852	1	-22	0	0.00493837	0.529	2.06445	1.71389	-10.5818	17	18	17	CDS
rno-miR-146a-5p	XM_039093316	Pspc1	TGAGAACTGAATTCCATGGGTT#AACCCATGGAGCAGTTTG#...((((((..(((((((((((#))))))))))))))))).	947	965	1	-22	0	0.00493837	0.529	0	0	-10.5818	17	18	17	CDS
rno-miR-146a-5p	XM_006248674	Ppm1f	TGAGAACTGAATTCCATGGGTT#GGGCCATGGAGTTAGTTCA#...((((((.(((((((((.((#)).))))))))))))))).	3249	3268	1	-21.2	0	0.00493011	0.471	0	0	-7.75705	17	19	15	3UTR
rno-miR-146a-5p	XM_039088064	Ppm1f	TGAGAACTGAATTCCATGGGTT#GGGCCATGGAGTTAGTTCA#...((((((.(((((((((.((#)).))))))))))))))).	3222	3241	1	-21.2	0	0.00493011	0.471	0	0	-7.75705	17	19	15	3UTR
rno-miR-146a-5p	XM_225905	RGD1305184	TGAGAACTGAATTCCATGGGTT#AGCCCAGACAATGGCCTGTGTAAATTCAGTTCG#...((((((((((.((((((((#.))))))))..)))))))))).	2333	2366	1	-20.6	0	0.00491897	0.485	0	0	-7.37138	18	22	10	5UTR
rno-miR-146a-5p	XM_039109427	Ube2j1	TGAGAACTGAATTCCATGGGTT#GACTCATGGAAGGCCTCTGTTGTCAA#(((.(((.((.(((((((((((#)))))))))))....)).))).))).	3116	3142	1	-19.8	0	0.0049058	0.456	0	0	-12.108	19	26	11	3UTR
rno-miR-146a-5p	XM_039109428	Ube2j1	TGAGAACTGAATTCCATGGGTT#GACTCATGGAAGGCCTCTGTTGTCAA#(((.(((.((.(((((((((((#)))))))))))....)).))).))).	3185	3211	1	-19.8	0	0.0049058	0.456	0	0	-12.108	19	26	11	3UTR
rno-miR-146a-5p	XM_006239134	Gale	TGAGAACTGAATTCCATGGGTT#GGCCCATGGGGTGAAGAGTCTGGTCTTCAGCAGCTCAG#((((..((((((((((((((((#))))))))))))..............))))...)))).	767	805	1	-21.6	0	0.00490265	0.382	0	0	-9.95757	20	38	12	CDS
rno-miR-146a-5p	NM_145779	Pzp	TGAGAACTGAATTCCATGGGTT#AACCTGGACAGACAGTGAAATTCCGAGTTGTCTCTGTGGACATCAGTTTTCG#.(((((((((..((((((((..#.))))))))..))))))))).	464	516	1	-21.6	1	0.0048666	0.529	0.484733	0.669479	-9.9649	17	21	9	CDS
rno-miR-146a-5p	NM_001004280	Mmadhc	TGAGAACTGAATTCCATGGGTT#CCCAGGATTTTGTTCTCT#.((((((.(((.(((.((((..#))))))).))))))))).	150	168	1	-19	1	0.00484017	0.574	0.666879	0.345516	-9.68681	16	18	9	CDS
rno-miR-146a-5p	NM_001105712	Grm3	TGAGAACTGAATTCCATGGGTT#AGTTCAGTTCTCAT#(((((((((((((.........#))))))))))))).	2874	2888	1	-17.2	1	0.00483045	0.574	0.358802	1.44653	-5.76291	13	14	13	3UTR
rno-miR-146a-5p	XM_039105947	Nars2	TGAGAACTGAATTCCATGGGTT#GTGGAGTTCAGGGCACAA#((.(..(((((((((((.....#)))))))))))..).)).	1811	1829	1	-18.2	0	0.0047719	0.603	0	0	-11.5151	14	18	11	3UTR
rno-miR-146a-5p	NM_001105754	Sez6	TGAGAACTGAATTCCATGGGTT#GGCCTGCTCAGTTCTGGCAGACACTTCTTCGTGGAGTTCAGTACTGAC#(.((.(((((((((((((((..#.))))))))))))))).)).).	1499	1547	1	-22.1	0	0.0047155	0.412	1.3417	1.4535	-9.22029	18	22	15	CDS
rno-miR-146a-5p	XM_039098164	Zfp827	TGAGAACTGAATTCCATGGGTT#AGCCCATGGAGGTGGATATCCAGGACTCC#.(((..(((..(((((((((((#))))))))))).........)))..))).	2623	2652	1	-21.4	0	0.00470061	0.441	0	0	-13.8806	17	29	11	CDS
rno-miR-146a-5p	XM_039098168	Zfp827	TGAGAACTGAATTCCATGGGTT#AGCCCATGGAGGTGGATATCCAGGACTCC#.(((..(((..(((((((((((#))))))))))).........)))..))).	2912	2941	1	-21.4	0	0.00470061	0.441	0	0	-13.8806	17	29	11	CDS
rno-miR-146a-5p	XM_039098169	Zfp827	TGAGAACTGAATTCCATGGGTT#AGCCCATGGAGGTGGATATCCAGGACTCC#.(((..(((..(((((((((((#))))))))))).........)))..))).	2622	2651	1	-21.4	0	0.00470061	0.441	0	0	-13.8806	17	29	11	CDS
rno-miR-146a-5p	NM_001107495	Cyp2s1	TGAGAACTGAATTCCATGGGTT#CCCATGGAATGACCTCAC#((((......((((((((((..#))))))))))...)))).	2109	2127	1	-18.8	0	0.00466994	0.471	0.543452	0.935425	-16.1138	14	18	10	3UTR
rno-miR-146a-5p	XM_039079115	Nav3	TGAGAACTGAATTCCATGGGTT#AATCCATGGATTTTCTAGTTGTCC#.((.(((((((.((((((((((#))))))))))..))).)))).)).	338	362	1	-21.2	0	0.00466332	0.544	0	0	-10.1722	19	24	10	5UTR
rno-miR-146a-5p	XM_039111590	Vti1b	TGAGAACTGAATTCCATGGGTT#AGCCATATGTTGATTGGTTCAATCTGGAGTTCAGTTGCCT#.(..((((((((((((......#.))))))))))))..).	3026	3066	1	-17.5	0	0.0046443	0.544	0	0	-8.38289	13	17	12	3UTR
rno-miR-146a-5p	NM_001105748	Kcnd1	TGAGAACTGAATTCCATGGGTT#AGCCCTGTGAAGACCAATCTTGGATTCAGATTGACATATTTCAGTTCTTG#.(((((((((((((((.(((((#))))))).)))............................)))))))))).	3600	3650	1	-18	1	0.00463431	0.618	0.972141	1.78694	-3.79332	20	50	10	3UTR
rno-miR-146a-5p	XM_006234308	Cers6	TGAGAACTGAATTCCATGGGTT#CCCGTGTGACACAGTTCTCAT#(((((((((...((((((((..#)))))).))..))))))))).	6792	6813	1	-23	1	0.00459557	0.485	0	0	-11.3517	17	21	9	3UTR
rno-miR-146a-5p	XM_006227760	Ncoa7	TGAGAACTGAATTCCATGGGTT#GCCCCTGGACATTCAGATTTTCT#.(((((((((((((((.((((.#)))).)))).)))))).))))).	1531	1554	1	-21.7	1	0.00459493	0.471	0	0	-3.79332	19	23	6	CDS
rno-miR-146a-5p	XM_006230453	Mki67	TGAGAACTGAATTCCATGGGTT#GGAATTTCAGTTCTCGG#(((((((((((((((.......#)))))).))))))))).	7157	7174	1	-20.7	1	0.00457938	0.456	0	0	-4.17062	15	17	9	CDS
rno-miR-146a-5p	XM_006238561	Glis1	TGAGAACTGAATTCCATGGGTT#AGCCCATGGACGAGTTTTCAG#((((((((....((((((((((#))))))))))..)))))))).	1144	1165	1	-24.4	1	0.00449259	0.456	0	0	-12.408	18	21	10	CDS
rno-miR-146a-5p	XM_039099303	RGD1310495	TGAGAACTGAATTCCATGGGTT#GGCACCACGATTGGTGGGATTCTCTTTGACCACATGAATCAGTTCTTT#.((((((((.(((.((((((((#.)))).))))))))))))))).	478	526	1	-19.5	1	0.00446503	0.559	0	0	-5.89267	19	22	15	CDS
rno-miR-146a-5p	NM_138549	Tecr	TGAGAACTGAATTCCATGGGTT#ACCCCCTACCTATGGAGTTCAGC#......(((((((((((((((.#.))))))))))))))).	693	716	1	-24	0	0.00437939	0.471	1.65297	1.40085	-15.5666	15	17	15	CDS
rno-miR-146a-5p	XM_006255218	Tecr	TGAGAACTGAATTCCATGGGTT#ACCCCCTACCTATGGAGTTCAGC#......(((((((((((((((.#.))))))))))))))).	647	670	1	-24	0	0.00437939	0.471	0	0	-15.5666	15	17	15	CDS
rno-miR-146a-5p	XM_039097453	Tecr	TGAGAACTGAATTCCATGGGTT#ACCCCCTACCTATGGAGTTCAGC#......(((((((((((((((.#.))))))))))))))).	800	823	1	-24	0	0.00437939	0.471	0	0	-15.5666	15	17	15	CDS
rno-miR-146a-5p	XM_039097454	Tecr	TGAGAACTGAATTCCATGGGTT#ACCCCCTACCTATGGAGTTCAGC#......(((((((((((((((.#.))))))))))))))).	755	778	1	-24	0	0.00437939	0.471	0	0	-15.5666	15	17	15	CDS
rno-miR-146a-5p	NM_001109206	RGD1565616	TGAGAACTGAATTCCATGGGTT#ACTCATGGACCAGTTCA#...((((((...(((((((((.#))))))))).)))))).	3506	3523	1	-20.5	0	0.00437458	0.515	1.17608	0.966775	-13.9286	15	17	9	CDS
rno-miR-146a-5p	NM_001014037	RGD1306227	TGAGAACTGAATTCCATGGGTT#ACCCATAAAAATGTAAACTCAATAGAGATTTTTCCTGGCGATGGATCGGTTTTCAA#((((((((((..(((((.(.(.#.).).))))))))))))))).	1224	1280	1	-19.5	1	0.00436547	0.603	0.691173	1.13046	-10.1092	17	21	15	CDS
rno-miR-146a-5p	XM_039110135	Vps13d	TGAGAACTGAATTCCATGGGTT#CCTGTGGGGAAACAGTTCTGGA#(.(((((((..(((((((((..#)))))))))...))))))).).	13614	13636	1	-19.9	1	0.00436216	0.515	0	0	-9.16853	17	22	9	3UTR
rno-miR-146a-5p	NM_001000107	Olr1662	TGAGAACTGAATTCCATGGGTT#ACCTGTGGATCTCATCTCAC#(((((..(((..(((((((((.#)))))))))..)))))))).	717	737	1	-20.2	0	0.00434905	0.603	0.761849	0.501912	-13.5538	17	20	9	CDS
rno-miR-146a-5p	NM_031514	Jak2	TGAGAACTGAATTCCATGGGTT#GATCCTGGGATTAGCATCACAGTTCTA#..((((((((((((((.(((((#)))))))))))).......))))))).	2250	2277	1	-18.7	1	0.0043461	0.588	2.08562	2.18275	-4.957	19	27	12	CDS
rno-miR-146a-5p	XM_008772891	Eif4ebp2	TGAGAACTGAATTCCATGGGTT#GCCGGGAATTCGGGTTCCTCAG#(((((((((((((((...(((.#))).))))))))).))).))).	4925	4947	1	-18.3	1	0.00433341	0.441	0	0	-4.17062	18	22	9	3UTR
rno-miR-146a-5p	NM_001025670	Gpat3	TGAGAACTGAATTCCATGGGTT#GGCCACGTTACGGATCGAGAAAGGAGCCCCTAAGGAGTCAGTTCTCAA#(((((((((.(((((..(((((#.)))))....)))))))))))))).	444	492	1	-25.2	1	0.00432964	0.529	1.45856	1.87209	-5.41313	19	25	14	CDS
rno-miR-146a-5p	NM_023094	Abo3	TGAGAACTGAATTCCATGGGTT#AATCCAGGAATTCAGG#......(((((((((.((((((#))))))))))))))).	104	120	1	-19.7	0	0.00432654	0.485	-0.0477556	-0.0506413	-15.7996	15	16	15	CDS
rno-miR-146a-5p	NM_001277209	Smim15	TGAGAACTGAATTCCATGGGTT#AACAGTAGTTTAAATGGGGTTCAGTTCTGGA#(.(((((((((((((((.....#.))))))))))))))).).	1052	1083	1	-22.5	1	0.0042767	0.662	0.17698	0.286301	-5.10125	16	19	15	3UTR
rno-miR-146a-5p	NM_001277210	Smim15	TGAGAACTGAATTCCATGGGTT#AACAGTAGTTTAAATGGGGTTCAGTTCTGGA#(.(((((((((((((((.....#.))))))))))))))).).	672	703	1	-22.5	1	0.0042767	0.662	0.17698	0.286301	-5.10125	16	19	15	3UTR
rno-miR-146a-5p	NM_022928	Grk4	TGAGAACTGAATTCCATGGGTT#TGGACAGTTCTCT#.((((((((...((((......#)))))))))))).	1627	1640	1	-15.5	1	0.00424856	0.603	1.9946	1.00346	-11.2074	12	13	12	CDS
rno-miR-146a-5p	XM_006251359	Grk4	TGAGAACTGAATTCCATGGGTT#TGGACAGTTCTCT#.((((((((...((((......#)))))))))))).	1649	1662	1	-15.5	1	0.00424856	0.603	0	0	-11.2074	12	13	12	CDS
rno-miR-146a-5p	XM_039106695	LOC100302465	TGAGAACTGAATTCCATGGGTT#CCCACTGGTATTTAGTTCTTG#.(((((((((((.(((((((..#)))).))).))))))))))).	1295	1316	1	-22.3	1	0.00423469	0.529	0	0	-5.08246	18	21	11	CDS
rno-miR-146a-5p	XM_039106880	LOC100302465	TGAGAACTGAATTCCATGGGTT#CCCACTGGTATTTAGTTCTTG#.(((((((((((.(((((((..#)))).))).))))))))))).	914	935	1	-22.3	1	0.00423469	0.529	0	0	-5.08246	18	21	11	CDS
rno-miR-146a-5p	XM_006228899	Wdr88	TGAGAACTGAATTCCATGGGTT#AGCAAAAGGAGTTCAGTTG#....(((((((((((.......#.))))))))))).	1513	1532	1	-16.4	0	0.00421813	0.544	0	0	-9.77961	11	13	11	CDS
rno-miR-146a-5p	XM_006240697	Itgb8	TGAGAACTGAATTCCATGGGTT#GCTCATGAGAATTCAGA#......(((((((((((((((.#))))))).)))))))).	4374	4391	1	-19.4	0	0.00420233	0.559	0	0	-15.5666	15	17	8	3UTR
rno-miR-146a-5p	XM_006242341	Tfcp2	TGAGAACTGAATTCCATGGGTT#GATCACTGGCCAGACGTGGAGTTCAGTGTTTCC#.(((((((((((((((((((((#.))))...))))))))))))).)))).	1891	1924	1	-23.2	1	0.00419206	0.441	0	0	-3.79332	21	27	13	3UTR
rno-miR-146a-5p	XM_017594895	Tfcp2	TGAGAACTGAATTCCATGGGTT#GCTGTATGACGTCTTCAGATCACTGGCCAGACGTGGAGTTCAGTGTTTCC#.(((((((((((((((((((((#.))))...))))))))))))).)))).	2112	2162	1	-23.2	1	0.00419206	0.441	0	0	-3.79332	21	27	13	3UTR
rno-miR-146a-5p	XM_017602292	Cdkl5	TGAGAACTGAATTCCATGGGTT#CCTATGGAAAGTCAGTG#.....(((((.(((((((((..#)))))))))..))))).	873	890	1	-18.4	0	0.00417826	0.471	0	0	-16.4904	14	17	9	CDS
rno-miR-146a-5p	XM_039100455	Cdkl5	TGAGAACTGAATTCCATGGGTT#CCTATGGAAAGTCAGTG#.....(((((.(((((((((..#)))))))))..))))).	873	890	1	-18.4	0	0.00417826	0.471	0	0	-16.4904	14	17	9	CDS
rno-miR-146a-5p	NM_001004208	Cacybp	TGAGAACTGAATTCCATGGGTT#AATCTTTTGAAACCTATCTCTGTGGAAAGCAGTTCA#...((((((..(((((((((..#.)))))))))..)))))).	544	580	1	-20.1	0	0.00417246	0.691	1.12318	0.871641	-10.5818	15	19	9	CDS
rno-miR-146a-5p	XM_017598707	Cacybp	TGAGAACTGAATTCCATGGGTT#AATCTTTTGAAACCTATCTCTGTGGAAAGCAGTTCA#...((((((..(((((((((..#.)))))))))..)))))).	551	587	1	-20.1	0	0.00417246	0.691	0	0	-10.5818	15	19	9	CDS
rno-miR-146a-5p	XM_039092656	Antxr2	TGAGAACTGAATTCCATGGGTT#AATCCTGGAATTGAGTCCTTC#.(((.(((.(((((((.(((((#)))))))))))).))).))).	704	725	1	-18.7	0	0.00411253	0.559	0	0	-8.96875	18	21	12	CDS
rno-miR-146a-5p	XM_039092657	Antxr2	TGAGAACTGAATTCCATGGGTT#AATCCTGGAATTGAGTCCTTC#.(((.(((.(((((((.(((((#)))))))))))).))).))).	704	725	1	-18.7	0	0.00411253	0.559	0	0	-8.96875	18	21	12	CDS
rno-miR-146a-5p	NM_022209	Ppp2r2b	TGAGAACTGAATTCCATGGGTT#GGAGTTCAATGTTCTCAA#(((((((((((((((.......#))))))))..))))))).	1670	1688	1	-19.8	1	0.00411168	0.647	0	0	-4.17062	15	18	8	3UTR
rno-miR-146a-5p	XM_017601026	Ppp2r2b	TGAGAACTGAATTCCATGGGTT#GGAGTTCAATGTTCTCAA#(((((((((((((((.......#))))))))..))))))).	1502	1520	1	-19.8	1	0.00411168	0.647	0	0	-4.17062	15	18	8	3UTR
rno-miR-146a-5p	XM_017601028	Ppp2r2b	TGAGAACTGAATTCCATGGGTT#GGAGTTCAATGTTCTCAA#(((((((((((((((.......#))))))))..))))))).	1732	1750	1	-19.8	1	0.00411168	0.647	0	0	-4.17062	15	18	8	3UTR
rno-miR-146a-5p	XM_017601029	Ppp2r2b	TGAGAACTGAATTCCATGGGTT#GGAGTTCAATGTTCTCAA#(((((((((((((((.......#))))))))..))))))).	1842	1860	1	-19.8	1	0.00411168	0.647	0	0	-4.17062	15	18	8	3UTR
rno-miR-146a-5p	XM_039097062	Ppp2r2b	TGAGAACTGAATTCCATGGGTT#GGAGTTCAATGTTCTCAA#(((((((((((((((.......#))))))))..))))))).	1513	1531	1	-19.8	1	0.00411168	0.647	0	0	-4.17062	15	18	8	3UTR
rno-miR-146a-5p	XM_039097070	Ppp2r2b	TGAGAACTGAATTCCATGGGTT#GGAGTTCAATGTTCTCAA#(((((((((((((((.......#))))))))..))))))).	1770	1788	1	-19.8	1	0.00411168	0.647	0	0	-4.17062	15	18	8	3UTR
rno-miR-146a-5p	XM_039097071	Ppp2r2b	TGAGAACTGAATTCCATGGGTT#GGAGTTCAATGTTCTCAA#(((((((((((((((.......#))))))))..))))))).	1609	1627	1	-19.8	1	0.00411168	0.647	0	0	-4.17062	15	18	8	3UTR
rno-miR-146a-5p	NM_139096	Lgals3bp	TGAGAACTGAATTCCATGGGTT#GGCCCTGGAGTTCCACACAGTGCCTCTCAA#((((((((((((((((.(((((#))))))))))))).....)))...))))).	1292	1322	1	-21.3	1	0.0041097	0.426	0.962021	0.695429	-3.93757	21	30	13	CDS
rno-miR-146a-5p	XM_008769649	Klhl20	TGAGAACTGAATTCCATGGGTT#ACGCAGAGGACCCGAATTCAGTTCCCAG#((.(((((((((((...(((((#.)))))))))))))))).)).	2660	2688	1	-22.2	0	0.00409608	0.485	0	0	-6.46361	18	21	16	3UTR
rno-miR-146a-5p	XM_006256222	Fkbp5	TGAGAACTGAATTCCATGGGTT#AGCCCACTGGATTGTGCATGCTCTTGACTCAGTCATTCAGACACTTAG#((((..((((((((((((((((#)))))).)))).......................))))))...)))).	3928	3976	1	-16.2	0	0.00408622	0.574	0	0	-9.95757	20	48	6	3UTR
rno-miR-146a-5p	XM_039098819	Fkbp5	TGAGAACTGAATTCCATGGGTT#AGCCCACTGGATTGTGCATGCTCTTGACTCAGTCATTCAGACACTTAG#((((..((((((((((((((((#)))))).)))).......................))))))...)))).	3642	3690	1	-16.2	0	0.00408622	0.574	0	0	-9.95757	20	48	6	3UTR
rno-miR-146a-5p	NM_001191816	Fam120a	TGAGAACTGAATTCCATGGGTT#CCCATCAGGAATTTAGTA#.....(((((((((((((((..#)))))..)))))))))).	4611	4629	1	-18.7	0	0.00408248	0.647	2.14757	1.9382	-13.6656	15	18	10	3UTR
rno-miR-146a-5p	XM_006228465	Ppp5c	TGAGAACTGAATTCCATGGGTT#ACCCATGGCCAGTTTTA#..(((((((....((((((((.#)))))))).))))))).	1111	1128	1	-18.9	1	0.00406167	0.529	0	0	-13.6602	15	17	8	CDS
rno-miR-146a-5p	NM_023970	Trpv4	TGAGAACTGAATTCCATGGGTT#CCCGTGGTCTTCATTCTCC#.(((((.((((..(((((((..#)))))))..))))))))).	2166	2185	1	-21.7	0	0.00405977	0.471	1.28656	2.06842	-9.97295	16	19	9	CDS
rno-miR-146a-5p	NM_001127377	Radx	TGAGAACTGAATTCCATGGGTT#GCCTATGGTTTTGAGTCTCT#.(((.(((.((..((((((((.#))))))))..)).)))))).	1948	1968	1	-21.1	0	0.00404115	0.559	-0.182564	0.255031	-13.6047	16	20	8	CDS
rno-miR-146a-5p	NM_022286	Vps33b	TGAGAACTGAATTCCATGGGTT#ACTGATGCCTTCAGTTCTCT#.((((((((((...(((.(((.#))).)))..)))))))))).	1724	1744	1	-19.1	1	0.00400813	0.5	1.42199	1.81582	-9.2861	16	20	10	CDS
rno-miR-146a-5p	NM_053021	Clu	TGAGAACTGAATTCCATGGGTT#ACCGCAGGAAAAGCCGCATGGAATGAGACAGAAGCATCAGTTTTCT#.(((((((((((((((((((((#.)))).))))))))............))))))))).	1615	1661	1	-23.7	1	0.00400542	0.559	0.244507	0.558935	-3.79332	21	36	9	CDS
rno-miR-146a-5p	XM_006252094	Clu	TGAGAACTGAATTCCATGGGTT#ACCGCAGGAAAAGCCGCATGGAATGAGACAGAAGCATCAGTTTTCT#.(((((((((((((((((((((#.)))).))))))))............))))))))).	1501	1547	1	-23.7	1	0.00400542	0.559	0	0	-3.79332	21	36	9	CDS
rno-miR-146a-5p	XM_006250298	Dcaf8	TGAGAACTGAATTCCATGGGTT#ACCCATGGTGTTCAC#.......(((((.((((((((.#)))))))).))))).	3351	3366	1	-19.2	0	0.00397468	0.544	0	0	-18.3994	13	15	8	3UTR
rno-miR-146a-5p	XM_039102301	Gatad2b	TGAGAACTGAATTCCATGGGTT#AACCTGTGGATATGAGTGCTCGA#((((.(((.(..((((((((((#))))))))))..).))).)))).	506	529	1	-20.5	0	0.00394237	0.5	0	0	-15.2846	18	23	10	CDS
rno-miR-146a-5p	NM_001134958	Srgap2	TGAGAACTGAATTCCATGGGTT#TCCGGAGGAGTTCAGTG#.....((((((((((.((((..#))))..)))))))))).	1357	1374	1	-18.3	0	0.00393753	0.5	1.62586	1.7837	-13.8986	14	17	10	CDS
rno-miR-146a-5p	NM_022667	Slco2a1	TGAGAACTGAATTCCATGGGTT#AACCAGGATGAAAAGTCGTTTGCCATTGGGGTACAGTTCTTG#.((((((((.((((((..(((.#.)))..)))))).)))))))).	1718	1760	1	-22.7	1	0.00392674	0.441	2.50115	1.85685	-5.03583	17	22	8	CDS
rno-miR-146a-5p	NM_001000180	Olr180	TGAGAACTGAATTCCATGGGTT#GCTCCTGGATGTGGTTCTCAT#((((((((....((((.((((.#)))).))))...)))))))).	635	656	1	-19	1	0.0039159	0.559	0.337418	0.405898	-12.408	16	21	8	CDS
rno-miR-146a-5p	NM_001080148	Dhcr24	TGAGAACTGAATTCCATGGGTT#GCTCTTTCTGCTCTGGGTGCGAGTGAAGGGGTTGGAGTTCGTTCTCAT#(((((((.((((((((......#.))))))))))))))).	35	83	1	-20.1	1	0.00389883	0.426	0.924942	1.32977	-6.25121	15	17	15	CDS
rno-miR-146a-5p	XM_039112757	Ppp4r4	TGAGAACTGAATTCCATGGGTT#GCCTAAGGAAATTCAGTTTA#...((((((((((((.(((((.#))))).)))).)))))))).	4139	4159	1	-19.5	0	0.00386968	0.603	0	0	-6.74759	17	20	8	3UTR
rno-miR-146a-5p	XM_017589562	Wdr93	TGAGAACTGAATTCCATGGGTT#CTCATGGAGTTTAGA#......((((((((((((((..#)))))))))))))).	2548	2563	1	-19.5	0	0.00386916	0.574	0	0	-15.5666	14	15	14	3UTR
rno-miR-146a-5p	NM_001134765	Oc90	TGAGAACTGAATTCCATGGGTT#GGCTGTCTCCATGGAAGGCATTCTCGG#((((((.((..(((((((((..#.)))))))))..)))))))).	1319	1346	1	-22.3	0	0.00386134	0.471	0.986906	1.15796	-9.54854	17	21	9	CDS
rno-miR-146a-5p	NM_022921	RT1-M3-1	TGAGAACTGAATTCCATGGGTT#GCCTTGTGGAACTTTAGTTTTCT#.((((((((((((((((((((.#)))).)))))).)))))))))).	1166	1189	1	-20.6	1	0.00385448	0.574	0.553258	0.334239	-3.79332	20	23	10	3UTR
rno-miR-146a-5p	XM_017602375	Akap17b	TGAGAACTGAATTCCATGGGTT#AATCCATGGAAGTCAGA#......((((.(((((((((((#))))))))))).)))).	3191	3208	1	-20.2	0	0.00379324	0.647	0	0	-18.3913	15	17	11	CDS
rno-miR-146a-5p	XM_006250734	G3bp2	TGAGAACTGAATTCCATGGGTT#GCCCACTGAGTTCAGGTCA#...((.((((((((..(((((.#)))))..)))))))).)).	1885	1904	1	-19.5	0	0.00378919	0.632	0	0	-9.384	15	19	8	3UTR
rno-miR-146a-5p	XM_039091861	G3bp2	TGAGAACTGAATTCCATGGGTT#GCCCACTGAGTTCAGGTCA#...((.((((((((..(((((.#)))))..)))))))).)).	1818	1837	1	-19.5	0	0.00378919	0.632	0	0	-9.384	15	19	8	3UTR
rno-miR-146a-5p	NM_001000561	Olr482	TGAGAACTGAATTCCATGGGTT#CCCAGGAATCTGTTTTCAG#(((((((.(.(((((.((((..#)))))))))).))))))).	410	429	1	-19.2	1	0.00373453	0.529	0.516134	0.281431	-7.72676	17	19	10	CDS
rno-miR-146a-5p	XM_039111162	Podn	TGAGAACTGAATTCCATGGGTT#GCCTTGGTCTTCAGTTCTGCAG#(((((((((((..(((.((((.#)))))))..))))))))).)).	3005	3027	1	-20.8	1	0.00372257	0.471	0	0	-8.57351	18	22	9	3UTR
rno-miR-146a-5p	XM_039083336	Tns1	TGAGAACTGAATTCCATGGGTT#AGCTTATGGGTACAGAGTTCTCT#.(((((((....((((((((((#)))))))))).....))))))).	6508	6531	1	-20.6	1	0.00371409	0.412	0	0	-12.2638	17	23	10	3UTR
rno-miR-146a-5p	NM_053959	Bin1	TGAGAACTGAATTCCATGGGTT#GCCCCCGGGATTCATGTTCA#...((((((((((((..((((.#))))..)))))))).)))).	1657	1677	1	-20.8	0	0.00371407	0.412	1.43026	1.00928	-6.74759	16	20	8	CDS
rno-miR-146a-5p	NM_001108281	Ncbp3	TGAGAACTGAATTCCATGGGTT#GGCCCTGACAGCTCTTGCCAGCACCCTTTCCCAAGAAAAGTCAGTTCTCAG#((((((((((.(((..((((..#.)))).)))...)))))))))).	2228	2279	1	-20.9	1	0.00370835	0.515	0.729835	1.15466	-7.73085	17	23	10	3UTR
rno-miR-146a-5p	NM_001000773	Olr1452	TGAGAACTGAATTCCATGGGTT#ACCCATTGCGCTATCCAGTTCTCAT#(((((((((.((.((((((((.#)))))).).)..)).))))))))).	373	398	1	-19.4	1	0.00370388	0.515	0	0	-6.46921	19	25	9	CDS
rno-miR-146a-5p	NM_001107645	Rhobtb3	TGAGAACTGAATTCCATGGGTT#AGCATTTAAAAGCCAAGCGGAACCATGGAATTCAGAGGAGCTCT#.(((..(((((((((((((.((#.)).))))))))))))).....))).	2603	2647	1	-22.3	0	0.00368935	0.588	1.57856	1.08249	-9.81332	18	26	13	3UTR
rno-miR-146a-5p	XM_006243553	Chst2	TGAGAACTGAATTCCATGGGTT#AGCCCTGGAGAGTTGAAGGCATTCGGTTTTGAT#(.((((((((((((((.(((((#)))))))))...........)))))))))).).	2751	2784	1	-18.9	1	0.00367671	0.544	0	0	-5.10125	20	33	10	3UTR
rno-miR-146a-5p	XM_008772688	RT1-M3-1	TGAGAACTGAATTCCATGGGTT#GCCTTGTGGAACTTTAGTTTTCT#.((((((((((((((((((((.#)))).)))))).)))))))))).	1108	1131	1	-20.6	1	0.00367538	0.574	0	0	-3.79332	20	23	10	3UTR
rno-miR-146a-5p	XM_039108791	Zfp248	TGAGAACTGAATTCCATGGGTT#TGGAATTGTTCTCAA#(((((((..(((((((......#)))))))))))))).	4280	4295	1	-15.8	1	0.00366226	0.618	0	0	-7.3076	14	15	14	3UTR
rno-miR-146a-5p	XM_039108795	Zfp248	TGAGAACTGAATTCCATGGGTT#TGGAATTGTTCTCAA#(((((((..(((((((......#)))))))))))))).	4238	4253	1	-15.8	1	0.00366226	0.618	0	0	-7.3076	14	15	14	3UTR
rno-miR-146a-5p	XM_006255824	Itgb1	TGAGAACTGAATTCCATGGGTT#GACCCTTGGAATCAAGCTCTTAC#(((((.((..((((((.(((((#))))).))))))..)).))))).	2987	3010	1	-20.9	0	0.00363025	0.529	0	0	-8.13743	18	23	6	3UTR
rno-miR-146a-5p	NM_001106184	Wwp2	TGAGAACTGAATTCCATGGGTT#CCATGGAAAGTTCATCGA#((((((((...((((((((...#))))))))))))).))).	1930	1948	1	-18.2	1	0.00362881	0.5	1.50801	2.19795	-9.06125	16	18	13	CDS
rno-miR-146a-5p	NM_001013200	Anp32e	TGAGAACTGAATTCCATGGGTT#AACTGGAGTTTCTCAGTATGGCCAACGTGGAGTTAAGTTCTTT#.(((((((.(((((((((((((#.))))..))))))))).))))))).	395	438	1	-21.7	1	0.00359226	0.515	2.1269	1.51563	-4.84971	20	25	9	CDS
rno-miR-146a-5p	XM_006254633	Ndfip1	TGAGAACTGAATTCCATGGGTT#CCCAGGACCAGAGTTCTCT#.(((((((....(((.((((..#)))))))....))))))).	835	854	1	-19.8	1	0.00356739	0.588	0	0	-12.4968	14	19	7	CDS
rno-miR-146a-5p	XM_039096119	Lyst	TGAGAACTGAATTCCATGGGTT#AAGCCATGGATTTAGTTCA#...((((((((.(((((((.((#)).))))))))))))))).	1532	1551	1	-21.6	0	0.00353595	0.632	0	0	-9.86134	17	19	15	CDS
rno-miR-146a-5p	XM_039096125	Lyst	TGAGAACTGAATTCCATGGGTT#AAGCCATGGATTTAGTTCA#...((((((((.(((((((.((#)).))))))))))))))).	1532	1551	1	-21.6	0	0.00353595	0.632	0	0	-9.86134	17	19	15	CDS
rno-miR-146a-5p	NM_031514	Jak2	TGAGAACTGAATTCCATGGGTT#AACCATTATAATAACTGGAAACGGTGGAATTCAGTGGTCAA#(((..((((((((((((.(...#.).))))))))))))..))).	1013	1054	1	-23.3	0	0.00350237	0.588	1.8884	1.87086	-11.0886	16	21	12	CDS
rno-miR-146a-5p	NM_001134621	Creb5	TGAGAACTGAATTCCATGGGTT#AGCCACAGTTTAACCCACAGCTGGAGTTCATTCAGTTCTTG#.(((((((((((((((((((((#.))))))....))))))....))))))))).	2550	2591	1	-23.8	1	0.00349196	0.559	0.995727	0.728716	-3.79332	21	31	9	3UTR
rno-miR-146a-5p	XM_008762908	Creb5	TGAGAACTGAATTCCATGGGTT#AGCCACAGTTTAACCCACAGCTGGAGTTCATTCAGTTCTTG#.(((((((((((((((((((((#.))))))....))))))....))))))))).	2303	2344	1	-23.8	1	0.00349196	0.559	0	0	-3.79332	21	31	9	3UTR
rno-miR-146a-5p	XM_039108135	Creb5	TGAGAACTGAATTCCATGGGTT#AGCCACAGTTTAACCCACAGCTGGAGTTCATTCAGTTCTTG#.(((((((((((((((((((((#.))))))....))))))....))))))))).	5628	5669	1	-23.8	1	0.00349196	0.559	0	0	-3.79332	21	31	9	3UTR
rno-miR-146a-5p	XM_039089624	Trappc5	TGAGAACTGAATTCCATGGGTT#ACCTATGGAATTGTCAGTG#.....((((((((((((((((.#)))))))))))..))))).	944	963	1	-20.6	0	0.00348735	0.485	0	0	-13.6656	16	19	11	3UTR
rno-miR-146a-5p	XM_006230214	Itgam	TGAGAACTGAATTCCATGGGTT#AGCCCAGCCTGTGCTGAGACTGGAGGCAACCATGGAATTCAGC#......((((((((((((((((#.)))..))))))))))))).	1970	2013	1	-20.8	0	0.00348159	0.471	0	0	-15.5666	16	20	13	CDS
rno-miR-146a-5p	NM_030994	Itga1	TGAGAACTGAATTCCATGGGTT#AACCCATGAGTTCAACCTCAA#((((...((((((.((((((((#))))))))))))))..)))).	1048	1069	1	-20	0	0.00347069	0.588	1.13895	0.871579	-12.3581	18	21	14	CDS
rno-miR-146a-5p	NM_212491	Wdr46	TGAGAACTGAATTCCATGGGTT#AACCTGAGTTCAGTTCCCAG#((.(((((((((((...(((((#)))))))))))))))).)).	1953	1973	1	-19.7	0	0.00345473	0.529	0.210259	0.295068	-6.46361	18	20	16	3UTR
rno-miR-146a-5p	XM_006255291	Syce2	TGAGAACTGAATTCCATGGGTT#AGAACAGGAATTCAGTTCTCAG#(((((((((((((((.((..((#))..))))))))))))))))).	3515	3537	1	-24	1	0.00345383	0.574	0	0	-4.17062	19	22	17	5UTR
rno-miR-146a-5p	NM_057097	Vamp3	TGAGAACTGAATTCCATGGGTT#AGCCCGCAGCATCTTGACAGTCCTTCCTGTGGAATGCTGTAGGTACAGCTTCTCAT#(((((((((.((((((((((..#.))))))))))..........))).)))))).	1148	1204	1	-19.2	1	0.00343844	0.529	1.06895	0.540139	-5.18008	19	32	10	3UTR
rno-miR-146a-5p	XM_039088216	Hunk	TGAGAACTGAATTCCATGGGTT#TCCATGGAATTCAT#.......(((((((((((((..#))))))))))))).	2148	2162	1	-19.5	0	0.00343582	0.471	0	0	-17.1102	13	14	13	CDS
rno-miR-146a-5p	XM_039089957	Cyp3a73	TGAGAACTGAATTCCATGGGTT#CCCAAAGGATTCAGTA#.....(((((((((..((((..#))))..))))))))).	2126	2142	1	-17.4	0	0.00341788	0.662	0	0	-14.6341	13	16	9	CDS
rno-miR-146a-5p	NM_001167548	Vom1r13	TGAGAACTGAATTCCATGGGTT#AGCCCATGGATTTGATTCTCAT#((((((.(.((.((((((((((#)))))))))).)).))))))).	172	194	1	-23.8	0	0.00341399	0.676	0	0	-9.88445	19	22	10	CDS
rno-miR-146a-5p	NM_001134961	Pdxdc1	TGAGAACTGAATTCCATGGGTT#AATCCTGGTGGAAGATGAGCTCAGTTCTCC#.(((((((((.(((((((((((#)))))..)))))).......))))))))).	1302	1332	1	-20	1	0.00340521	0.574	0.0455276	-0.0308665	-6.6181	20	30	9	CDS
rno-miR-146a-5p	XM_039086236	Pdxdc1	TGAGAACTGAATTCCATGGGTT#AATCCTGGTGGAAGATGAGCTCAGTTCTCC#.(((((((((.(((((((((((#)))))..)))))).......))))))))).	1136	1166	1	-20	1	0.00340521	0.574	0	0	-6.6181	20	30	9	CDS
rno-miR-146a-5p	XM_039086238	Pdxdc1	TGAGAACTGAATTCCATGGGTT#AATCCTGGTGGAAGATGAGCTCAGTTCTCC#.(((((((((.(((((((((((#)))))..)))))).......))))))))).	1272	1302	1	-20	1	0.00340521	0.574	0	0	-6.6181	20	30	9	CDS
rno-miR-146a-5p	NM_001100476	Nectin1	TGAGAACTGAATTCCATGGGTT#CCCAACACTGGAATTTGTTTGTGTTCTCT#.(((((((((((((((((((..#))))....))))))))).....)))))).	2607	2636	1	-19	1	0.00337203	0.485	1.43005	0.552452	-3.79332	19	29	9	3UTR
rno-miR-146a-5p	XM_039105811	Snap23	TGAGAACTGAATTCCATGGGTT#CCCTAGGTTCAGTTCTG#..(((((((((..((..(((..#)))..))))))))))).	4105	4122	1	-17.9	1	0.003362	0.559	0	0	-9.82598	14	17	11	3UTR
rno-miR-146a-5p	NM_001191865	Ripk2	TGAGAACTGAATTCCATGGGTT#CTGTGTAGTTCAGTTTTTAT#(((((((((((((.(((((...#))))).))))))))))))).	1937	1957	1	-18.2	1	0.00334632	0.706	2.00259	1.43358	-4.79441	18	20	13	3UTR
rno-miR-146a-5p	NM_001109395	Pcdhb20	TGAGAACTGAATTCCATGGGTT#TCCAGGACTACAGCATTAGCCCCAGTTCTCAT#(((((((((........(((((#.)))))))))))))).	633	665	1	-17	1	0.00332623	0.588	0.669591	0.812484	-14.4661	14	16	14	CDS
rno-miR-146a-5p	XM_006236632	Smyd1	TGAGAACTGAATTCCATGGGTT#AACCTTGGGTACTGGTTCTCAC#(((((((((...((((.(((((#)))))))))...))))))))).	8757	8779	1	-18.7	1	0.00332039	0.456	0	0	-11.3517	18	22	9	3UTR
rno-miR-146a-5p	XM_039107313	Smyd1	TGAGAACTGAATTCCATGGGTT#AACCTTGGGTACTGGTTCTCAC#(((((((((...((((.(((((#)))))))))...))))))))).	8635	8657	1	-18.7	1	0.00332039	0.456	0	0	-11.3517	18	22	9	3UTR
rno-miR-146a-5p	NM_001191769	Thada	TGAGAACTGAATTCCATGGGTT#TCCAGAGAAGAAATGCAATGGGTTCAGTTCTTC#.((((((((((.((((((.(((#.))).)).)))))))))))))).	1938	1971	1	-19.7	1	0.00331318	0.515	0	0	-7.14013	19	23	14	CDS
rno-miR-146a-5p	NM_001107380	Zfp474	TGAGAACTGAATTCCATGGGTT#GCTGGTTTATTTTAGTCATCTACCTTAGGAATTCAGTTCTGGC#(.(((((((((((((..((((.#.))))..))))))))))))).).	2048	2091	1	-24.4	1	0.00330595	0.632	1.31347	0.705508	-5.3343	18	23	13	3UTR
rno-miR-146a-5p	XM_039096793	Zfp474	TGAGAACTGAATTCCATGGGTT#GCTGGTTTATTTTAGTCATCTACCTTAGGAATTCAGTTCTGGC#(.(((((((((((((..((((.#.))))..))))))))))))).).	1832	1875	1	-24.4	1	0.00330595	0.632	0	0	-5.3343	18	23	13	3UTR
rno-miR-146a-5p	NM_134335	Myo9a	TGAGAACTGAATTCCATGGGTT#AGCTCATGGAATTCT#........((((((((((((((#)))))))))))))).	2924	2939	1	-19.6	0	0.00328532	0.588	1.79466	1.47887	-19.4239	14	15	14	CDS
rno-miR-146a-5p	XM_003750590	Nbeal2	TGAGAACTGAATTCCATGGGTT#AATCCGTGAGCACAGACAGAAACTTCGGAAGAAGTATGGAGTTCAGTTCATCC#.(((((((((((((((((....#.))))))))))))))).)).	3402	3455	1	-22.6	1	0.00327999	0.5	0	0	-3.79332	17	20	15	CDS
rno-miR-146a-5p	XM_003750591	Nbeal2	TGAGAACTGAATTCCATGGGTT#AATCCGTGAGCACAGACAGAAACTTCGGAAGAAGTATGGAGTTCAGTTCATCC#.(((((((((((((((((....#.))))))))))))))).)).	3321	3374	1	-22.6	1	0.00327999	0.5	0	0	-3.79332	17	20	15	CDS
rno-miR-146a-5p	XM_006244009	Nbeal2	TGAGAACTGAATTCCATGGGTT#AATCCGTGAGCACAGACAGAAACTTCGGAAGAAGTATGGAGTTCAGTTCATCC#.(((((((((((((((((....#.))))))))))))))).)).	3402	3455	1	-22.6	1	0.00327999	0.5	0	0	-3.79332	17	20	15	CDS
rno-miR-146a-5p	XM_002729879	LOC100363016	TGAGAACTGAATTCCATGGGTT#CCCTGAGAGTGTAACACTCATTGGTTTATCTATGGGTTCAGTTGTCT#.((.(((((((.(((((((((.#.)))))))))))))))).)).	60	107	1	-22.4	0	0.0032727	0.676	0	0	-10.1722	18	21	16	5UTR
rno-miR-146a-5p	XM_039108499	LOC108350852	TGAGAACTGAATTCCATGGGTT#GGCCCAGGCTTCAGTTCCAG#((.((((((((..((.((((((#)))))))).)))))))))).	1978	1998	1	-20.6	0	0.00326819	0.353	0	0	-10.3641	18	20	10	CDS
rno-miR-146a-5p	XM_003750455	Adamts8	TGAGAACTGAATTCCATGGGTT#AGCCCGTGGGAGGAGTGAGTTCA#...(((((...(((((((((((#)))))))))))......))))).	1967	1990	1	-21.6	0	0.00320775	0.515	0	0	-11.6382	16	23	11	CDS
rno-miR-146a-5p	NM_001130548	Col14a1	TGAGAACTGAATTCCATGGGTT#AGCCCCGTGACTTCAGTTCTCC#.((((((((((.(.((((((..#.))))))).)))))))))).	2460	2482	1	-23.4	1	0.00319812	0.5	1.02322	0.895716	-7.99697	17	20	10	CDS
rno-miR-146a-5p	XM_039079205	Col14a1	TGAGAACTGAATTCCATGGGTT#AGCCCCGTGACTTCAGTTCTCC#.((((((((((.(.((((((..#.))))))).)))))))))).	2461	2483	1	-23.4	1	0.00319812	0.5	0	0	-7.99697	17	20	10	CDS
rno-miR-146a-5p	XM_039104203	Slc12a5	TGAGAACTGAATTCCATGGGTT#AACCTGTGGAGTTCCTACCTGACCAAGGGGGTGATCGT#(((..(((((((((((((((((#))))))))))))))...............)))..))).	1191	1229	1	-19.9	0	0.00318532	0.353	0	0	-11.0886	20	38	14	CDS
rno-miR-146a-5p	NM_001164157	Nus1	TGAGAACTGAATTCCATGGGTT#AACCATTCTTTATGGATGGACAGTTTTCAG#(((((((((...((((((((..#.))))))))....))))))))).	2207	2237	1	-18.3	1	0.00317507	0.632	0.515677	0.273501	-11.3517	17	23	9	3UTR
rno-miR-146a-5p	XM_006248482	Lrrc15	TGAGAACTGAATTCCATGGGTT#GATCCATGGGGTGCACTTCACAA#((.(((.((.((((((((((((#)))))))))))).)).))).)).	3873	3896	1	-18.7	0	0.00314687	0.574	0	0	-8.28131	19	23	12	3UTR
rno-miR-146a-5p	NM_001170470	Chst9	TGAGAACTGAATTCCATGGGTT#CCCATGGAAAGATTAGTGTCTGCAT#((((((((((.(((((((((..#)))))))))...))))).))).)).	795	820	1	-20.3	1	0.00314679	0.588	1.48251	1.78479	-6.76235	19	25	9	CDS
rno-miR-146a-5p	XM_039103807	Spag17	TGAGAACTGAATTCCATGGGTT#ACCCGTGGAGGCAACAGTTTTA#..(((((((..((((((((((.#))))))))))....))))))).	6950	6972	1	-22.4	1	0.00313261	0.588	0	0	-9.02428	17	22	10	CDS
rno-miR-146a-5p	XM_039097276	Kdm3b	TGAGAACTGAATTCCATGGGTT#GACTCAGGAATTCAGGCATCTCT#.((((.(((((((((.((((((#)))))))))))))))...)))).	5968	5991	1	-23.2	0	0.00312216	0.529	0	0	-5.92733	19	23	15	CDS
rno-miR-146a-5p	XM_039097278	Kdm3b	TGAGAACTGAATTCCATGGGTT#GACTCAGGAATTCAGGCATCTCT#.((((.(((((((((.((((((#)))))))))))))))...)))).	5317	5340	1	-23.2	0	0.00312216	0.529	0	0	-5.92733	19	23	15	CDS
rno-miR-146a-5p	NM_001107961	Dmbx1	TGAGAACTGAATTCCATGGGTT#GGCTTGTGGTGTTCGGTTTTA#..((((((((((.(((((((((#))))))))).)))))))))).	1809	1830	1	-20.6	1	0.00309334	0.588	0.105926	-0.135756	-6.24613	19	21	10	3UTR
rno-miR-146a-5p	NM_012689	Esr1	TGAGAACTGAATTCCATGGGTT#AACCCATGGAACATTTCTGGA#(.((((.((..(((((((((((#))))))))))))).)))).).	95	116	1	-20.3	0	0.00303987	0.515	1.14312	0.775827	-10.7122	18	21	13	5UTR
rno-miR-146a-5p	NM_001108383	Ebf2	TGAGAACTGAATTCCATGGGTT#ACCCGCAGTTCTCAG#(((((((((.......(((((.#)))))))))))))).	609	624	1	-17.2	1	0.00303508	0.471	0.424266	0.272091	-14.4661	14	15	14	5UTR
rno-miR-146a-5p	XM_006239879	Pum2	TGAGAACTGAATTCCATGGGTT#ACCCATGGATTCTTCAGG#......(((((.(((((((((.#)))))))))...))))).	879	897	1	-20.7	0	0.0030161	0.574	0	0	-18.9134	14	18	9	CDS
rno-miR-146a-5p	XM_006239883	Pum2	TGAGAACTGAATTCCATGGGTT#ACCCATGGATTCTTCAGG#......(((((.(((((((((.#)))))))))...))))).	879	897	1	-20.7	0	0.0030161	0.574	0	0	-18.9134	14	18	9	CDS
rno-miR-146a-5p	NM_198792	Nme8	TGAGAACTGAATTCCATGGGTT#TCTATGGGAGCAGTTCA#...((((((..(((((((((..#))))))))).)))))).	1428	1445	1	-19.2	0	0.0029946	0.559	0.788333	0.472264	-10.5818	15	17	9	CDS
rno-miR-146a-5p	NM_001008354	Mrrf	TGAGAACTGAATTCCATGGGTT#AGCCACAAGGTGGAGGCTTTGCCAGGGTTCAGTTCTG#..(((((((((.(((.(((...#.))))))))))))))).	3222	3259	1	-19.2	1	0.00299119	0.456	-0.108433	0.30281	-8.53685	15	17	15	3UTR
rno-miR-146a-5p	XM_039105267	Mrrf	TGAGAACTGAATTCCATGGGTT#AGCCACAAGGTGGAGGCTTTGCCAGGGTTCAGTTCTG#..(((((((((.(((.(((...#.))))))))))))))).	3181	3218	1	-19.2	1	0.00299119	0.456	0	0	-8.53685	15	17	15	3UTR
rno-miR-146a-5p	NM_001134516	Uap1l1	TGAGAACTGAATTCCATGGGTT#GGTCCCCCCATGGATTCTGGTTGTCT#.((.(((((((.((((((((..#.))))))))))).)))).)).	1745	1771	1	-22.2	0	0.00298937	0.515	2.60587	1.7273	-10.1722	17	21	11	3UTR
rno-miR-146a-5p	NM_170789	Cd247	TGAGAACTGAATTCCATGGGTT#GACCCAGACCACCCAGTTCTG#..(((((((.......((((((#)))))).......))))))).	1435	1456	1	-17.5	1	0.00298667	0.441	-0.477557	-0.566528	-15.4856	13	21	7	3UTR
rno-miR-146a-5p	XM_006240016	Atxn7l1	TGAGAACTGAATTCCATGGGTT#CTCATGGAATTCAA#.......(((((((((((((..#))))))))))))).	5115	5129	1	-19	0	0.00295056	0.574	0	0	-17.1102	13	14	13	3UTR
rno-miR-146a-5p	XM_008764632	Atxn7l1	TGAGAACTGAATTCCATGGGTT#CTCATGGAATTCAA#.......(((((((((((((..#))))))))))))).	5465	5479	1	-19	0	0.00295056	0.574	0	0	-17.1102	13	14	13	3UTR
rno-miR-146a-5p	NM_001127569	Ppp1r42	TGAGAACTGAATTCCATGGGTT#CCCCTGGGAGAAAAGCTCCTGTTTGACCCAAGGACTCTTCGTTCTCT#.((((((.(((.(((.((((((#.)))))).)))...))))))))).	519	566	1	-21.7	1	0.0029299	0.588	1.40421	1.45441	-9.68681	18	24	9	CDS
rno-miR-146a-5p	NM_001106880	Plcl2	TGAGAACTGAATTCCATGGGTT#CCCTGGAGTTTCGCCTCAGTTGCTTC#.(((((((((((((((.(((..#)))))))))......)))))).))).	2215	2241	1	-17.5	1	0.00292496	0.529	1.28089	1.50687	-3.79332	18	26	9	CDS
rno-miR-146a-5p	NM_031737	Nkx6-1	TGAGAACTGAATTCCATGGGTT#AGCCTCTTTAACACTTATTAATTTATATGAGGAATTCGGTTTG#...((((((((((((.......#.)))))))))))).	2992	3035	1	-16.3	0	0.00291238	0.647	1.96149	1.69815	-6.74759	12	14	12	3UTR
rno-miR-146a-5p	NM_013047	Trhr	TGAGAACTGAATTCCATGGGTT#CCCATGGAGGACAAGTTCA#...(((((...(((((((((..#)))))))))....))))).	1961	1980	1	-21.7	0	0.00289525	0.632	-0.244232	0.224009	-11.6382	14	19	9	3UTR
rno-miR-146a-5p	NM_053492	Slc44a1	TGAGAACTGAATTCCATGGGTT#GGCCCATGGATCATATCTCC#.((((..(((..((((((((((#)))))))))))))..)))).	2755	2775	1	-21.8	0	0.0028722	0.618	0.246043	0.517832	-13.4095	17	20	13	3UTR
rno-miR-146a-5p	XM_006251230	Htt	TGAGAACTGAATTCCATGGGTT#ATCCAGGCAATTCAGTCTCG#.(((.((((((((((.(((((.#))))))).))))))))))).	6930	6950	1	-20.3	0	0.00285902	0.559	0	0	-8.14541	18	20	11	CDS
rno-miR-146a-5p	XM_039079883	Glyatl1	TGAGAACTGAATTCCATGGGTT#GACCTGTAATGGCCAAACCTCTCCGCTGAGCCACCATCGTTGTTCAGTTTTCT#.(((((((((((......(((.#.)))......))))))))))).	1264	1317	1	-17	1	0.00285077	0.574	0	0	-6.90779	14	22	11	3UTR
rno-miR-146a-5p	XM_006244144	Dlec1	TGAGAACTGAATTCCATGGGTT#AGCCACGTGGAGTTCAGCAACCTCT#.(((..((((((((((((((((#)))).))))))))))))....))).	2957	2982	1	-23.9	0	0.00284834	0.426	0	0	-9.81332	19	25	12	CDS
rno-miR-146a-5p	XM_006256829	Prps2	TGAGAACTGAATTCCATGGGTT#ACCCATGGAATCTTCTCT#.(((((..(.(((((((((((.#))))))))))))))))).	942	960	1	-21.6	0	0.00283637	0.618	0	0	-8.89315	17	18	17	CDS
rno-miR-146a-5p	NM_017162	Cblif	TGAGAACTGAATTCCATGGGTT#GCTCATGGAAAACTCAGTA#.....(((((.((((((((((.#))))))))))...))))).	145	164	1	-19.1	0	0.00279628	0.515	1.06887	0.56307	-16.4904	15	19	10	CDS
rno-miR-146a-5p	XM_039095580	Macroh2a1	TGAGAACTGAATTCCATGGGTT#GACGCCATGGTTTTGTAAAAGTCGATTCGCTCTTAC#(((((..(((((((((((((((#))).)))))).............)))))).))))).	834	870	1	-14.8	0	0.0027795	0.618	0	0	-7.38222	20	36	6	3UTR
rno-miR-146a-5p	NM_138881	Rsad2	TGAGAACTGAATTCCATGGGTT#TCCACAGGGAAGGAGTTCAGTTCACAG#((.((((((((((((.......#.)))))))))))).)).	1275	1302	1	-19.6	0	0.00277873	0.485	-0.464039	-0.0451244	-5.72816	14	17	12	3UTR
rno-miR-146a-5p	XM_039109305	Lypla1	TGAGAACTGAATTCCATGGGTT#GACCCTTTAGTTCCCCTAATGTTTGGTTCTCT#.(((((((((((.....(((..#.)))....))))))))))).	638	670	1	-17.6	1	0.00276618	0.618	0	0	-6.90779	14	20	11	CDS
rno-miR-146a-5p	NM_053923	Pik3c2g	TGAGAACTGAATTCCATGGGTT#CCCAGGTTCAGTGCTCT#.(((.((((((..((.((((..#)))))))))))).))).	521	538	1	-17.7	0	0.00276103	0.544	0.187289	0.155098	-12.7813	15	17	12	CDS
rno-miR-146a-5p	NM_001137646	Zpr1	TGAGAACTGAATTCCATGGGTT#ACGTGTGGAGTCCAGCTGTTCTCAT#(((((((((.((((((((.((.#)).)))))))).))...))))))).	2104	2129	1	-19.4	1	0.00275982	0.471	0.0908608	0.0850068	-5.18008	19	25	8	3UTR
rno-miR-146a-5p	XM_017589100	Phactr2	TGAGAACTGAATTCCATGGGTT#AACCCAATGAACGCAGTTCTCT#.((((((((..(((..((((((#))))))..)))..)))))))).	5453	5475	1	-23.3	1	0.0027485	0.529	0	0	-8.8291	17	22	8	3UTR
rno-miR-146a-5p	XM_039110963	Phactr2	TGAGAACTGAATTCCATGGGTT#AACCCAATGAACGCAGTTCTCT#.((((((((..(((..((((((#))))))..)))..)))))))).	7283	7305	1	-23.3	1	0.0027485	0.529	0	0	-8.8291	17	22	8	3UTR
rno-miR-146a-5p	XM_039100345	Foxr2	TGAGAACTGAATTCCATGGGTT#GACATGGGGAATGAATTTTTCCTCCCTTGTACCATGGATCAGTGCTCT#.(((.(((((..(((((((...#.)))))))))))).))).	1076	1124	1	-21.3	0	0.00274574	0.588	0	0	-14.0839	15	18	12	CDS
rno-miR-146a-5p	XM_039099157	Slc16a9	TGAGAACTGAATTCCATGGGTT#GCCTATGGAATACTCATGTTCTTT#.((((((((((((((((((((.#)))))))))))..))).)))))).	1622	1646	1	-23.2	1	0.00274438	0.471	0	0	-3.79332	20	24	11	CDS
rno-miR-146a-5p	NM_001191943	Dok6	TGAGAACTGAATTCCATGGGTT#AGCTTGCAAGGTCATGGGTTTGGTTCATCAA#(((((((((((.(((((((.((#.)).))))))))))))))).))).	891	922	1	-18.8	1	0.00272797	0.529	2.64171	2.08126	-7.28438	20	24	15	CDS
rno-miR-146a-5p	XM_039078599	Mgat3	TGAGAACTGAATTCCATGGGTT#AACTCGTGTGAGTCAGTTCTG#..(((((((.((((((((((((#)))))))).))))))))))).	1233	1254	1	-22	1	0.00272328	0.515	0	0	-6.19951	19	21	11	5UTR
rno-miR-146a-5p	NM_001106616	Csgalnact2	TGAGAACTGAATTCCATGGGTT#CCCGTGGTGTTCAGTCTTT#.(((.(((((((.(((((((..#))))))).)))))))))).	1555	1574	1	-23.7	0	0.00270491	0.529	0.913108	0.623612	-9.20149	17	19	10	CDS
rno-miR-146a-5p	NM_001107253	Kctd6	TGAGAACTGAATTCCATGGGTT#AGCCCCTGATTCAGTGTCTCAA#((((((((((((..((.(((((#))))).))))))))).))))).	340	362	1	-19.9	1	0.0026978	0.529	0.807932	0.789109	-6.08354	19	22	9	CDS
rno-miR-146a-5p	NM_001109072	Fam163a	TGAGAACTGAATTCCATGGGTT#ACCCGTGGGCTAGTTTA#...((((((...(((((((((.#))))))))).)))))).	1444	1461	1	-18.3	0	0.00269581	0.5	0.036099	-0.00464252	-13.9286	15	17	9	3UTR
rno-miR-146a-5p	NM_001013961	Actrt1	TGAGAACTGAATTCCATGGGTT#GACCTTTTTGAGTGGGAGTTAGGAGTGAAACCCAATGAACAGCCAGTTTTCAT#(((((((((..(((..((((((#.))))))..)))....))))))))).	390	443	1	-18.6	1	0.00267635	0.544	1.38213	1.40103	-8.97335	18	26	9	CDS
rno-miR-146a-5p	XM_213954	Nid1	TGAGAACTGAATTCCATGGGTT#GGCCCTGGAACACAGTTCA#...((((((..(((((.(((((#))))))))))..)))))).	2180	2199	1	-21.3	0	0.00267609	0.397	0	0	-10.5818	16	19	10	CDS
rno-miR-146a-5p	NM_001106862	Ngp	TGAGAACTGAATTCCATGGGTT#AGTCCTTCCCATGGACTGTTCACTCAT#((((...(((((((((((((..#.))))))))..))))))))).	802	829	1	-20.2	0	0.00266927	0.515	-0.194887	0.198781	-11.5013	17	21	9	3UTR
rno-miR-146a-5p	XM_039092783	Tapt1	TGAGAACTGAATTCCATGGGTT#GCTAATAGTTTGCTTAAGAAACATGGAGCAGTTCTCT#.((((((((..(((((((..((#.))..))))))))))))))).	992	1029	1	-21.1	1	0.0026678	0.603	0	0	-7.86061	17	21	15	CDS
rno-miR-146a-5p	NM_001107727	Mttp	TGAGAACTGAATTCCATGGGTT#GGCCTGGAGTTCATCTCCACAGTGCAGTTCTCC#.(((((((((((((((.((.(.#).))))))))))).............)))))).	2525	2558	1	-18.8	1	0.00264927	0.441	1.54143	1.22082	-3.79332	18	33	11	CDS
rno-miR-146a-5p	XM_006239182	Srrm1	TGAGAACTGAATTCCATGGGTT#GACCCAGGAAGGACCCTTCAGTTA#....(((((((((((.((((((#))))))))))......))))))).	3542	3566	1	-18.3	0	0.00264346	0.588	0	0	-9.77961	17	24	10	3UTR
rno-miR-146a-5p	XM_006239185	Srrm1	TGAGAACTGAATTCCATGGGTT#GACCCAGGAAGGACCCTTCAGTTA#....(((((((((((.((((((#))))))))))......))))))).	3497	3521	1	-18.3	0	0.00264346	0.588	0	0	-9.77961	17	24	10	3UTR
rno-miR-146a-5p	XM_006239382	Tardbp	TGAGAACTGAATTCCATGGGTT#GATCATGATGTCATGGTGTTTGGTTCTTT#.(((((((((((.((((((...#.)))))).))))))))))).	1962	1991	1	-19.9	1	0.00264122	0.632	0	0	-5.08246	17	20	11	3UTR
rno-miR-146a-5p	NM_001005540	Ppm1j	TGAGAACTGAATTCCATGGGTT#AGCCATAACCAGGGATTCAGCTTCTA#..(((((((((((((...((((#.)))).))))))))).)))).	430	456	1	-18.8	1	0.00262041	0.426	0	0	-5.19005	17	21	9	CDS
rno-miR-146a-5p	XM_008761380	Ppm1j	TGAGAACTGAATTCCATGGGTT#AGCCATAACCAGGGATTCAGCTTCTA#..(((((((((((((...((((#.)))).))))))))).)))).	499	525	1	-18.8	1	0.00262041	0.426	0	0	-5.19005	17	21	9	CDS
rno-miR-146a-5p	NM_001105740	Ndst2	TGAGAACTGAATTCCATGGGTT#AGCCCTAGCACCTTTGAGGAAATTCAGTTCTTC#.((((((((((((((..((((.#.))))....)))).)))))))))).	2737	2770	1	-20.6	1	0.00261746	0.5	2.49372	1.8832	-4.02637	18	25	10	CDS
rno-miR-146a-5p	XM_006240618	Tecpr2	TGAGAACTGAATTCCATGGGTT#AGCAGGAGGTGGACACCATGGAGTTCAGTG#.....(((((((((((((((((#.))).)))))))))))))).	2104	2134	1	-25.4	0	0.00257259	0.426	0	0	-13.6656	17	20	14	CDS
rno-miR-146a-5p	XM_039113127	Rab30	TGAGAACTGAATTCCATGGGTT#GCCCATGGATTTCTTGTCTA#..(((...(((.(((((((((.#))))))))).)))...))).	1573	1593	1	-21.5	0	0.00255814	0.529	0	0	-14.0621	15	20	9	3UTR
rno-miR-146a-5p	XM_039113130	Rab30	TGAGAACTGAATTCCATGGGTT#GCCCATGGATTTCTTGTCTA#..(((...(((.(((((((((.#))))))))).)))...))).	1130	1150	1	-21.5	0	0.00255814	0.529	0	0	-14.0621	15	20	9	3UTR
rno-miR-146a-5p	XM_039091314	Zbed6	TGAGAACTGAATTCCATGGGTT#CTGTGGGAAAATGGGCCTCAGTTCTCT#.(((((((((.((((((((...#)))))))).........))))))))).	682	709	1	-19.5	1	0.00253033	0.559	0	0	-6.6181	17	27	9	5UTR
rno-miR-146a-5p	XM_006227931	Prr18	TGAGAACTGAATTCCATGGGTT#CGTGTCAGTTCTCAA#((((((((((....((((....#)))))))))))))).	3323	3338	1	-17	1	0.00250466	0.676	0	0	-12.2551	14	15	14	3UTR
rno-miR-146a-5p	NM_001370876	Dmd	TGAGAACTGAATTCCATGGGTT#GACCACATTGGGCATTCAGCTCTCAC#(((((.((((((((((((((((#)))).))).))).)))))).))))).	9225	9251	1	-21.9	0	0.00250454	0.515	0	0	-5.83853	21	26	6	CDS
rno-miR-146a-5p	XM_017589399	Spns1	TGAGAACTGAATTCCATGGGTT#AGCCCAAGGGGTTTGGTGCTA#..((.((((((((((.((((((#)))))).)))))))))).)).	2075	2096	1	-20.4	0	0.00249059	0.603	0	0	-9.30909	18	21	10	3UTR
rno-miR-146a-5p	NM_031124	Stx3	TGAGAACTGAATTCCATGGGTT#TTCATGGATGAGTTCTTT#.(((((((....((((((((..#))))))))..))))))).	167	185	1	-17	1	0.00247954	0.618	2.08167	1.46009	-12.2638	15	18	8	CDS
rno-miR-146a-5p	NM_001007694	Ifit3	TGAGAACTGAATTCCATGGGTT#AGCAGTTCTCTGTGGATGCTCTGAAACAGGCCATGGAGTTGAATTCTCAG#((((((.(.((((((((((.((#.)).)))))))))).).)))))).	716	766	1	-23.9	0	0.00246514	0.5	0.304361	0.686811	-6.53765	19	24	10	CDS
rno-miR-146a-5p	NM_001100660	Ripor1	TGAGAACTGAATTCCATGGGTT#GCCCTGGAGAGCTTCAGCTTCCTCAA#((((((((((((((((.((((.#)))))))))...))))).))).))).	2656	2682	1	-19.4	1	0.00246242	0.5	2.15286	1.25132	-3.93757	20	26	9	CDS
rno-miR-146a-5p	NM_001270385	Kif28p	TGAGAACTGAATTCCATGGGTT#GACCTGTTGGAATCCAGTTTACAG#((.((((((.((((((((((((#))))))).))))).)))))).)).	3012	3036	1	-19.6	0	0.00245706	0.632	1.91458	1.30656	-6.73762	20	24	7	CDS
rno-miR-146a-5p	NM_001033984	Ank3	TGAGAACTGAATTCCATGGGTT#GGAATTTAGTTCTGAG#(.(((((((((((((.......#))))))))))))).).	5969	5985	1	-19.2	1	0.00244734	0.485	0.923834	1.16541	-5.3343	14	16	13	CDS
rno-miR-146a-5p	XM_039098834	Ank3	TGAGAACTGAATTCCATGGGTT#GGAATTTAGTTCTGAG#(.(((((((((((((.......#))))))))))))).).	5966	5982	1	-19.2	1	0.00244734	0.485	0	0	-5.3343	14	16	13	CDS
rno-miR-146a-5p	NM_013044	Tmod1	TGAGAACTGAATTCCATGGGTT#CCCAGTGGAGACCAGGAGGCAAATGTTGGCGTGAACTCTTGTGGTTCAGTTCTTT#.((((((((((((.((.(((((#.))))).)).)))))))))))).	1231	1286	1	-20.9	1	0.00244028	0.559	0.601289	0.817009	-4.65016	19	23	12	3UTR
rno-miR-146a-5p	XM_039109313	Tmod1	TGAGAACTGAATTCCATGGGTT#CCCAGTGGAGACCAGGAGGCAAATGTTGGCGTGAACTCTTGTGGTTCAGTTCTTT#.((((((((((((.((.(((((#.))))).)).)))))))))))).	1054	1109	1	-20.9	1	0.00244028	0.559	0	0	-4.65016	19	23	12	3UTR
rno-miR-146a-5p	NM_001039208	Spns1	TGAGAACTGAATTCCATGGGTT#AGCCCAAGGGGTTTGGTGCTA#..((.((((((((((.((((((#)))))).)))))))))).)).	2130	2151	1	-20.4	0	0.00243882	0.603	0	0	-9.30909	18	21	10	3UTR
rno-miR-146a-5p	NM_022236	Pde10a	TGAGAACTGAATTCCATGGGTT#TCCATGAGGGTGTGGTTCTG#..((((((..((((((((((..#)))))).))))..)))))).	2946	2966	1	-17.7	1	0.00243336	0.515	1.97113	1.49258	-7.2559	16	20	6	3UTR
rno-miR-146a-5p	NM_001012017	Slc49a4	TGAGAACTGAATTCCATGGGTT#ACCTGTGGAGTTGTCACTTTCTTAA#((((((.((((((((((((((.#)))))))))))..)))..)))))).	1503	1528	1	-19	0	0.00241662	0.618	1.87172	1.98308	-5.48126	20	25	11	CDS
rno-miR-146a-5p	XM_039095332	Prpf18	TGAGAACTGAATTCCATGGGTT#AACTCGTGGAATTTGTTTTA#..(((((.((((((((((((((#))))))))))))))))))).	1883	1903	1	-20.1	0	0.00241293	0.662	0	0	-7.27064	19	20	19	3UTR
rno-miR-146a-5p	XM_006241129	Vom2r54	TGAGAACTGAATTCCATGGGTT#GACCTGGGTGGGACTGCTCACCACAGATGACCACAGTGGTGTTCAGTTTATATCAG#((((((((((((.(((((((((#.)))).)).))).)))))))))...))).	629	685	1	-19.9	1	0.0023815	0.588	0	0	-5.22671	21	29	9	CDS
rno-miR-146a-5p	XM_006253786	Nedd9	TGAGAACTGAATTCCATGGGTT#GATGCATATGATGTCCCCCGGGGAGTTCAGTTTCTCGA#(((((((((((((((.((((..#.)))).))))))))))).)))).	1184	1222	1	-26.8	1	0.00237052	0.5	0	0	-4.17062	19	23	11	CDS
rno-miR-146a-5p	NM_001077435	Bex2	TGAGAACTGAATTCCATGGGTT#CCCATGGGTCTCCAGTTCTG#..(((((((...((((((((..#))))))))....))))))).	632	652	1	-22.9	1	0.00236956	0.559	0.624308	0.244208	-12.3711	15	20	8	3UTR
rno-miR-146a-5p	NM_001008807	Krt77	TGAGAACTGAATTCCATGGGTT#AGCAACCATGAGCCGCCAGTTCAGTTCTCAG#((((((((((((((((((((((#)))..))))).).....))))))))))))).	79	110	1	-21.2	1	0.00235579	0.456	0.513144	0.752507	-3.93757	22	31	13	5UTR
rno-miR-146a-5p	NM_001000522	Olr1069	TGAGAACTGAATTCCATGGGTT#ATCCTGTTGGGATTCAGAGCTTCTCC#.(((((((((((((((.((((.#))))...))))))))))...))))).	45	71	1	-20.4	1	0.00235505	0.618	0.70461	0.461555	-3.79332	19	26	10	CDS
rno-miR-146a-5p	XM_039100011	P2ry4	TGAGAACTGAATTCCATGGGTT#GCACTATGGGATTCAAACTCAT#((((...((((((((((((((.#)).))))))))))))..)))).	472	494	1	-19.8	0	0.00234701	0.647	0	0	-11.5013	18	22	12	5UTR
rno-miR-146a-5p	XM_039101034	Acan	TGAGAACTGAATTCCATGGGTT#AACCCATGGACTGAGTTTA#...(((((.(..((((((((((#)))))))))).).))))).	7657	7676	1	-20.1	0	0.00234575	0.544	0	0	-13.7425	16	19	10	3UTR
rno-miR-146a-5p	XM_039101035	Acan	TGAGAACTGAATTCCATGGGTT#AACCCATGGACTGAGTTTA#...(((((.(..((((((((((#)))))))))).).))))).	6970	6989	1	-20.1	0	0.00234575	0.544	0	0	-13.7425	16	19	10	3UTR
rno-miR-146a-5p	NM_001006970	Uqcrc2	TGAGAACTGAATTCCATGGGTT#ACCCGTGGAATTGAAGCAGTTG#....(((((((((((((((((.#))))))))))))....))))).	331	353	1	-21.7	0	0.00234555	0.574	1.98098	1.69017	-9.54656	17	22	12	CDS
rno-miR-146a-5p	NM_001008326	Rexo2	TGAGAACTGAATTCCATGGGTT#AGCCCGTGAGTTGATGCCAGTTCTCAA#(((((((((((((.((((((((#)))))))))))).....))))))))).	851	878	1	-23.6	1	0.00234355	0.441	2.31272	2.04892	-4.79441	21	27	12	CDS
rno-miR-146a-5p	NM_001014090	Oaf	TGAGAACTGAATTCCATGGGTT#AGCCTAACTGCGCCCATCTTGAGGCAGAGGGGGTTAAAGCAGTTCTCC#.((((((((((((((((((((.#.))))))............))))))....)))))))).	1202	1250	1	-21.2	1	0.00234351	0.412	2.0839	1.80377	-3.79332	20	38	8	3UTR
rno-miR-146a-5p	NM_001302217	Elavl2	TGAGAACTGAATTCCATGGGTT#AGCTCATGGTGTTTAGTG#.....(((((((.(((((((((#))))))))).))))))).	3421	3439	1	-19.5	0	0.00233198	0.632	2.1554	2.4249	-14.9547	16	18	9	3UTR
rno-miR-146a-5p	NM_001083966	Rev3l	TGAGAACTGAATTCCATGGGTT#GCCTATGGAAAACAGCGTTCTCAG#(((((((((..((((((((((.#))))))))))..))..))))))).	6150	6174	1	-23.3	1	0.00233029	0.456	1.77058	1.69232	-8.00486	19	24	10	CDS
rno-miR-146a-5p	XM_236761	Dppa5	TGAGAACTGAATTCCATGGGTT#GAACCTTCCCATGGATTCCTTAGTTTTCGG#((((((((((..((((((((..#.))))))))....)))))))))).	486	516	1	-23.7	1	0.00232736	0.559	0	0	-10.1092	18	24	10	5UTR
rno-miR-146a-5p	NM_001013059	Ndfip1	TGAGAACTGAATTCCATGGGTT#CCCAGGACCAGAGTTCTCT#.(((((((....(((.((((..#)))))))....))))))).	770	789	1	-19.8	1	0.00232157	0.618	2.74895	1.80632	-12.4968	14	19	7	CDS
rno-miR-146a-5p	XM_017594659	Odf1	TGAGAACTGAATTCCATGGGTT#GGCCCCTGCGACCCTTGCAACCCCTGCTATCCCTGTGGAAGCCGATTCTCC#.(((((.((..(((((((((..#.)))))))))..)).))))).	796	847	1	-19.6	0	0.0023195	0.5	0	0	-9.40429	16	21	9	CDS
rno-miR-146a-5p	NM_001107299	Rgr	TGAGAACTGAATTCCATGGGTT#CCTATGTGAATCCAGTTTTACAA#(((((((((.((((((((((..#)))))).)))).))))))).)).	1311	1334	1	-19	1	0.00231483	0.588	1.24003	1.34908	-5.18008	19	23	7	3UTR
rno-miR-146a-5p	XM_006257054	Nlgn3	TGAGAACTGAATTCCATGGGTT#AACCCATGGAGTTTGTCCTTT#.(((.((.((((((((((((((#)))))))))))))))).))).	5358	5379	1	-22.3	0	0.00230823	0.691	0	0	-10.226	19	21	16	3UTR
rno-miR-146a-5p	XM_006257055	Nlgn3	TGAGAACTGAATTCCATGGGTT#AACCCATGGAGTTTGTCCTTT#.(((.((.((((((((((((((#)))))))))))))))).))).	5298	5319	1	-22.3	0	0.00230823	0.691	0	0	-10.226	19	21	16	3UTR
rno-miR-146a-5p	NM_001191604	Ranbp2	TGAGAACTGAATTCCATGGGTT#AACTGGTGGGTCTCGGAATACATTCAGTTTTGGA#(.(((((((((((((((.((((#)))).)))))...........)))))))))).).	3338	3372	1	-18.2	1	0.00229793	0.574	0.84597	0.768168	-5.10125	20	34	10	CDS
rno-miR-146a-5p	NM_017323	Nr2c2	TGAGAACTGAATTCCATGGGTT#GCCCTTGGAATGGTTTTCT#.(((((((..((((((.((((.#)))).))))))))))))).	4757	4776	1	-20.5	1	0.00227186	0.603	0	0	-6.09222	17	19	13	3UTR
rno-miR-146a-5p	XM_039108266	Nr2c2	TGAGAACTGAATTCCATGGGTT#GCCCTTGGAATGGTTTTCT#.(((((((..((((((.((((.#)))).))))))))))))).	4859	4878	1	-20.5	1	0.00227186	0.603	0	0	-6.09222	17	19	13	3UTR
rno-miR-146a-5p	XM_039108276	Nr2c2	TGAGAACTGAATTCCATGGGTT#GCCCTTGGAATGGTTTTCT#.(((((((..((((((.((((.#)))).))))))))))))).	4764	4783	1	-20.5	1	0.00227186	0.603	0	0	-6.09222	17	19	13	3UTR
rno-miR-146a-5p	NM_001100572	Iars1	TGAGAACTGAATTCCATGGGTT#ACCCACAATTCATGGAATCAGTCTGGT#(.((.((((.((((((((((((#.)))))))))))))))))).).	664	691	1	-19.5	0	0.00226958	0.529	0.852648	1.30273	-10.4628	19	22	18	CDS
rno-miR-146a-5p	XM_006233447	Odf2l	TGAGAACTGAATTCCATGGGTT#AACCCATGGAATAGTGACGTGTACACTCAGGATGGTTCTTC#.(((((((..((((((((((((#)))))))))))).....................))))))).	4156	4197	1	-21.3	1	0.00225337	0.515	0	0	-6.09222	19	41	12	5UTR
rno-miR-146a-5p	XM_006233449	Odf2l	TGAGAACTGAATTCCATGGGTT#AACCCATGGAATAGTGACGTGTACACTCAGGATGGTTCTTC#.(((((((..((((((((((((#)))))))))))).....................))))))).	4155	4196	1	-21.3	1	0.00225337	0.515	0	0	-6.09222	19	41	12	5UTR
rno-miR-146a-5p	NM_001002819	Gfpt2	TGAGAACTGAATTCCATGGGTT#AAGCCGTGGAGTTCTTCTTT#.(((((..(((((((((((.((#)).)))))))))))))))).	860	880	1	-20.3	0	0.00224885	0.515	1.89621	1.70005	-7.65065	18	20	16	CDS
rno-miR-146a-5p	XM_039079170	Asap1	TGAGAACTGAATTCCATGGGTT#TCCGTTTGTTTCCCATCAGGAATTTGAGTTCTCT#.(((((((((((((((((((..#.)))))..))))))).))))))).	5841	5875	1	-23.5	1	0.00223941	0.559	0	0	-3.79332	19	24	7	3UTR
rno-miR-146a-5p	XM_039079176	Asap1	TGAGAACTGAATTCCATGGGTT#TCCGTTTGTTTCCCATCAGGAATTTGAGTTCTCT#.(((((((((((((((((((..#.)))))..))))))).))))))).	5713	5747	1	-23.5	1	0.00223941	0.559	0	0	-3.79332	19	24	7	3UTR
rno-miR-146a-5p	XM_039079180	Asap1	TGAGAACTGAATTCCATGGGTT#TCCGTTTGTTTCCCATCAGGAATTTGAGTTCTCT#.(((((((((((((((((((..#.)))))..))))))).))))))).	5625	5659	1	-23.5	1	0.00223941	0.559	0	0	-3.79332	19	24	7	3UTR
rno-miR-146a-5p	NM_001108098	Cpm	TGAGAACTGAATTCCATGGGTT#AGCCCATGGAGTTCCAGGCGGTCGAGTTCA#...(((((((((((((((((((#))))))))))))))..........))))).	2530	2560	1	-25.1	0	0.00223497	0.471	0.0337521	-0.0523487	-6.51454	19	30	14	3UTR
rno-miR-146a-5p	NM_031972	Aldh3a1	TGAGAACTGAATTCCATGGGTT#AGCCCATGGAGGCACTTGGGACCAGTCCTCAC#((((.((((..(((((((((((#)))))))))))...........)))).)))).	1074	1106	1	-23	0	0.002223	0.471	0.803033	1.08944	-12.1239	19	32	11	CDS
rno-miR-146a-5p	NM_001001383	Olr1540	TGAGAACTGAATTCCATGGGTT#GATGTGTGCAACCATGGAGTGTTTTCTCT#.(((((....(((((((((...#.)))))))))...))))).	314	343	1	-19.7	0	0.00221039	0.588	-0.388089	0.605706	-9.94954	14	19	9	CDS
rno-miR-146a-5p	XM_008773696	Uty	TGAGAACTGAATTCCATGGGTT#ACCCATGGTTCATCTTTCAT#(((((..((((..((((((((.#))))))))))))..))))).	3433	3453	1	-19.1	0	0.00218384	0.632	0	0	-12.0182	17	20	12	CDS
rno-miR-146a-5p	XM_017602449	Uty	TGAGAACTGAATTCCATGGGTT#ACCCATGGTTCATCTTTCAT#(((((..((((..((((((((.#))))))))))))..))))).	3128	3148	1	-19.1	0	0.00218384	0.632	0	0	-12.0182	17	20	12	CDS
rno-miR-146a-5p	XM_232777	RGD1562036	TGAGAACTGAATTCCATGGGTT#GATCTTGGTGGGGGCTTCCCAGGAATTGAGGGCTCT#.(((..((.((((((.((((..#.)))))))))).))..))).	875	911	1	-22.6	0	0.00217571	0.441	0	0	-11.1028	15	20	10	CDS
rno-miR-146a-5p	NM_001108024	Lrfn5	TGAGAACTGAATTCCATGGGTT#TCCATGGGATGCGGTA#.....((((.((((((((((..#)))))))))).)))).	968	984	1	-18.3	0	0.00217037	0.574	2.22574	1.9836	-14.9081	14	16	10	CDS
rno-miR-146a-5p	NM_053581	Idh3b	TGAGAACTGAATTCCATGGGTT#CCTGTGGAATTCAA#.......(((((((((((((..#))))))))))))).	241	255	1	-18.7	0	0.00216981	0.485	0.595581	0.463909	-17.1102	13	14	13	CDS
rno-miR-146a-5p	NM_001127555	Irak1	TGAGAACTGAATTCCATGGGTT#AGCCCGGGCTATTCAGTTTTTAC#((((((((((((.((.((((((#))))))))..)))))))))))).	1146	1169	1	-21.8	1	0.00216461	0.485	1.39731	1.39847	-5.45975	20	23	12	CDS
rno-miR-146a-5p	XM_006229598	Irak1	TGAGAACTGAATTCCATGGGTT#AGCCCGGGCTATTCAGTTTTTAC#((((((((((((.((.((((((#))))))))..)))))))))))).	1129	1152	1	-21.8	1	0.00216461	0.485	0	0	-5.45975	20	23	12	CDS
rno-miR-146a-5p	XM_039089429	Tmem132b	TGAGAACTGAATTCCATGGGTT#GCCTTTGCCTGGATTTCAGTTTTCAT#(((((((((((.(((..((((.#.))))))).))))))))))).	6262	6288	1	-22.1	1	0.00215649	0.603	0	0	-7.51743	18	21	11	3UTR
rno-miR-146a-5p	NM_053811	Slc9a3r2	TGAGAACTGAATTCCATGGGTT#GGAATTCATGTTTTCG#.((((((((((((((.......#)))))))).)))))).	1469	1485	1	-17.9	1	0.00214518	0.603	1.14086	1.4721	-4.02637	14	16	8	3UTR
rno-miR-146a-5p	NM_001108520	Patl1	TGAGAACTGAATTCCATGGGTT#GATAAGGGACTCTGCTCCCTTGGGGTTGCAGTTCTGAA#(.((((((((((((((.(((..#.))).))))))).))))))).).	3567	3605	1	-23.5	1	0.00214212	0.603	-0.0378011	-0.0531237	-5.10125	18	23	7	3UTR
rno-miR-146a-5p	XM_003750957	LOC100909671	TGAGAACTGAATTCCATGGGTT#GCCACAGTCAGGGCAGACCTTCATGGAATCAGTTCC#...((((((.((((((((((((#.))))..)))))))))))))).	3602	3638	1	-22	0	0.0021403	0.485	0	0	-7.75705	18	22	14	3UTR
rno-miR-146a-5p	NM_001126100	Nop10	TGAGAACTGAATTCCATGGGTT#GCCCATCCTGCTCGGTTCTCC#.(((((((((.....((((((.#)))))).....))))))))).	180	201	1	-20.6	1	0.00213878	0.485	1.54945	1.46713	-12.8463	15	21	9	CDS
rno-miR-146a-5p	XM_039113311	Ttll5	TGAGAACTGAATTCCATGGGTT#AGCCCATGGATTTCATGAAGTTCA#...((((((((.((((((((((#)))))))))).))))....)))).	580	604	1	-23.2	0	0.00212732	0.544	0	0	-9.86134	18	24	10	CDS
rno-miR-146a-5p	XM_039113313	Ttll5	TGAGAACTGAATTCCATGGGTT#AGCCCATGGATTTCATGAAGTTCA#...((((((((.((((((((((#)))))))))).))))....)))).	516	540	1	-23.2	0	0.00212732	0.544	0	0	-9.86134	18	24	10	CDS
rno-miR-146a-5p	XM_039113314	Ttll5	TGAGAACTGAATTCCATGGGTT#AGCCCATGGATTTCATGAAGTTCA#...((((((((.((((((((((#)))))))))).))))....)))).	516	540	1	-23.2	0	0.00212732	0.544	0	0	-9.86134	18	24	10	CDS
rno-miR-146a-5p	XM_039113317	Ttll5	TGAGAACTGAATTCCATGGGTT#AGCCCATGGATTTCATGAAGTTCA#...((((((((.((((((((((#)))))))))).))))....)))).	516	540	1	-23.2	0	0.00212732	0.544	0	0	-9.86134	18	24	10	CDS
rno-miR-146a-5p	XM_001061373	Mettl21cl1	TGAGAACTGAATTCCATGGGTT#AACTGGGTTTGCTTCGTCTAAGGAGTTTATGTTCTCAT#(((((((((((((((.((((..#.)))).)))))))).))))))).	526	564	1	-20.8	1	0.00212356	0.574	0	0	-4.17062	19	23	8	5UTR
rno-miR-146a-5p	XM_039087429	Nol11	TGAGAACTGAATTCCATGGGTT#GACTGTCTTCGGGACAGTAATGTCAGCATGGAGTCAGTTTTTG#.((((((((.((((((((....#.)))))))))))))))).	1579	1622	1	-19.7	1	0.00210236	0.603	0	0	-5.03583	16	18	16	CDS
rno-miR-146a-5p	XM_039107596	Zfp638	TGAGAACTGAATTCCATGGGTT#AGCCCGTGGAATTCCACACAGATTTCCTGGCCACGGATCTTAT#(((((.((((((((((((((((#))))))))))))))....................)).))))).	485	528	1	-22.6	0	0.00209348	0.529	0	0	-5.83853	21	43	14	CDS
rno-miR-146a-5p	XM_039107600	Zfp638	TGAGAACTGAATTCCATGGGTT#AGCCCGTGGAATTCCACACAGATTTCCTGGCCACGGATCTTAT#(((((.((((((((((((((((#))))))))))))))....................)).))))).	485	528	1	-22.6	0	0.00209348	0.529	0	0	-5.83853	21	43	14	CDS
rno-miR-146a-5p	NM_001105781	Mrpl22	TGAGAACTGAATTCCATGGGTT#GTGGAATTCAGATCCAA#((.((.(((((((((((.....#))))))))))).)))).	407	424	1	-17.9	0	0.00206627	0.544	2.05523	1.7581	-7.39607	15	17	11	CDS
rno-miR-146a-5p	XM_039106537	LOC120101643	TGAGAACTGAATTCCATGGGTT#AGCTCATGGAAGTCAGA#......((((.(((((((((((#))))))))))).)))).	361	378	1	-19.8	0	0.0020547	0.471	0	0	-18.3913	15	17	11	CDS
rno-miR-146a-5p	NM_001013862	Cep95	TGAGAACTGAATTCCATGGGTT#ACTATAAGGACCAGTTCTCAT#(((((((((...(((.......#.))).))))))))).	2543	2564	1	-16.5	1	0.00205458	0.485	1.64316	1.4963	-11.5847	12	15	9	CDS
rno-miR-146a-5p	NM_012507	Atp1b2	TGAGAACTGAATTCCATGGGTT#ACTGATGGAGTTGTTCTA#..(((((..((((((((.(((.#))).))))))))))))).	1740	1758	1	-17.2	0	0.0020454	0.515	1.33916	1.34966	-8.32703	16	18	13	3UTR
rno-miR-146a-5p	NM_001108575	Brd3	TGAGAACTGAATTCCATGGGTT#TCCATGGTGTGCAGGTTTTCT#.(((((((..((.(((((((..#))))))).))...))))))).	2459	2480	1	-19	1	0.00204223	0.618	2.02735	1.55708	-7.38135	16	21	7	3UTR
rno-miR-146a-5p	NM_001106929	Copg2	TGAGAACTGAATTCCATGGGTT#ACCTGTGGATGTTATCTTGGCTTCTGTGGGATAAGTTCTTG#.(((((((..((((((((((..#.)))))))))).))))))).	2681	2722	1	-18.7	1	0.00204078	0.485	2.27185	2.29341	-6.09222	17	20	10	CDS
rno-miR-146a-5p	XM_017598153	Dzip3	TGAGAACTGAATTCCATGGGTT#TGGAATTTAGTTCTG#..((((((((((((((......#)))))))))))))).	5118	5133	1	-19.4	1	0.00203867	0.691	0	0	-4.957	14	15	14	3UTR
rno-miR-146a-5p	XM_017598155	Dzip3	TGAGAACTGAATTCCATGGGTT#TGGAATTTAGTTCTG#..((((((((((((((......#)))))))))))))).	3247	3262	1	-19.4	1	0.00203867	0.691	0	0	-4.957	14	15	14	3UTR
rno-miR-146a-5p	XM_039099600	Slitrk4	TGAGAACTGAATTCCATGGGTT#ATCCATGGATTAAAGGGCTCC#.(((..((....(((((((((.#)))))))))....))..))).	5106	5127	1	-19.9	0	0.00203478	0.574	0	0	-18.2838	14	21	9	3UTR
rno-miR-146a-5p	XM_039099602	Slitrk4	TGAGAACTGAATTCCATGGGTT#ATCCATGGATTAAAGGGCTCC#.(((..((....(((((((((.#)))))))))....))..))).	4934	4955	1	-19.9	0	0.00203478	0.574	0	0	-18.2838	14	21	9	3UTR
rno-miR-146a-5p	XM_017590240	Adam12	TGAGAACTGAATTCCATGGGTT#CCCATGGTGTTCAGC#......((((((.(((((((..#))))))).)))))).	1856	1871	1	-21	0	0.00203464	0.397	0	0	-16.8557	13	15	7	CDS
rno-miR-146a-5p	XM_039093463	Fam107a	TGAGAACTGAATTCCATGGGTT#AGGCCAGAGTACAGAGAGTGGAATTCAGAGCTCAT#((((..(((((((((((.....#.)))))))))))..)))).	302	337	1	-21.2	0	0.00203003	0.485	0	0	-9.95757	15	19	11	CDS
rno-miR-146a-5p	XM_006246487	Wnt3a	TGAGAACTGAATTCCATGGGTT#ACCCATGGAAACAGACTCAA#((((..(((..((((((((((.#)))))))))).))).)))).	2124	2144	1	-22	0	0.00202062	0.5	0	0	-14.0249	17	20	10	3UTR
rno-miR-146a-5p	XM_039097436	Siah1	TGAGAACTGAATTCCATGGGTT#GCCCCTTGGAATTTGAGTTCA#...(((((((((((((.((((.#))))..)))))))).))))).	6534	6555	1	-20.7	0	0.00200815	0.676	0	0	-6.51454	17	21	8	5UTR
rno-miR-146a-5p	XM_039098060	Chd9	TGAGAACTGAATTCCATGGGTT#GACTCAGTAACTTCCCTCCCAGTGAAACAGTCTGTGGCTCAGTTCTCAA#((((((((((...(((((((..#.))))))).)))))))))).	854	903	1	-22.1	1	0.00198848	0.529	0	0	-11.3983	17	20	10	5UTR
rno-miR-146a-5p	XM_039098062	Chd9	TGAGAACTGAATTCCATGGGTT#GACTCAGTAACTTCCCTCCCAGTGAAACAGTCTGTGGCTCAGTTCTCAA#((((((((((...(((((((..#.))))))).)))))))))).	854	903	1	-22.1	1	0.00198848	0.529	0	0	-11.3983	17	20	10	5UTR
rno-miR-146a-5p	NM_001107754	Traf6	TGAGAACTGAATTCCATGGGTT#GCCTGTGCTGCTGCCAGTGGAAAGGTTACTGCTCTGGTGTTGAGTTCTCAT#((((((((.(((.(((.((((.#.))))))).))).)))))))).	2180	2231	1	-22.3	1	0.00198584	0.529	0.124863	0.523352	-6.28309	18	22	8	3UTR
rno-miR-146a-5p	XM_006244550	Runx2	TGAGAACTGAATTCCATGGGTT#GGCCCAGAGGAATTCAGCTTCG#...((((((((((((.((((((#))))))..))))))))).))).	6202	6224	1	-23.5	0	0.0019722	0.544	0	0	-6.74759	18	22	9	3UTR
rno-miR-146a-5p	XM_017596547	Runx2	TGAGAACTGAATTCCATGGGTT#GGCCCAGAGGAATTCAGCTTCG#...((((((((((((.((((((#))))))..))))))))).))).	6171	6193	1	-23.5	0	0.0019722	0.544	0	0	-6.74759	18	22	9	3UTR
rno-miR-146a-5p	NM_139339	Slc36a2	TGAGAACTGAATTCCATGGGTT#ACCTATGCCTTGCAGTTCTA#..(((((((.....(((((((.#))))))).....))))))).	1158	1178	1	-18	1	0.00195639	0.441	0.90191	1.16919	-14.5171	14	20	7	CDS
rno-miR-146a-5p	NM_001109126	Tex43	TGAGAACTGAATTCCATGGGTT#GCTCAGGGGTGATGATATCCACTTGCCTCGGTTCTCAC#(((((((((((((((.(((((.#)))))))))).................)))))))))).	140	178	1	-20.2	1	0.00194496	0.5	0.464929	0.457426	-4.17062	20	38	10	CDS
rno-miR-146a-5p	NM_001108941	Tbl1xr1	TGAGAACTGAATTCCATGGGTT#AACTGCCATGGGAATCACTGTTTTCAT#((((((((((.(((((((((((#)))..)))))))).)))..))))))).	6642	6669	1	-19.3	1	0.00192545	0.676	0.463461	0.379199	-6.76235	21	27	8	3UTR
rno-miR-146a-5p	NM_001287618	Malrd1	TGAGAACTGAATTCCATGGGTT#GCCTGGATGGAAACTGCCATCTTCAGTTCTA#..(((((((((((((((((((.#))))..)))))).........))))))))).	1054	1085	1	-19.3	1	0.00192325	0.559	0.689922	0.639592	-4.957	19	31	9	CDS
rno-miR-146a-5p	NM_201271	Plppr1	TGAGAACTGAATTCCATGGGTT#AACCCAAACCTGAGGATCCCCGTGGAGTTCCTCTGAT#(.(((...((((((((((((..#.)))))))))))).))).).	1282	1319	1	-21.7	0	0.00191707	0.426	0	0	-10.8595	16	20	12	CDS
rno-miR-146a-5p	NM_001013911	Ift80	TGAGAACTGAATTCCATGGGTT#AACCCATGTTGATACAGTTCTTG#.((((((((.(((.((((((((#))))))))..))).)))))))).	2260	2283	1	-22	1	0.00191199	0.647	1.74476	1.81556	-5.89267	19	23	8	CDS
rno-miR-146a-5p	NM_032061	Cntnap1	TGAGAACTGAATTCCATGGGTT#GGCCCAGGAGTTCTCTCAC#(((((...(((((((.((((((#)))))))))))))))))).	3215	3234	1	-21.7	0	0.00190898	0.368	1.15097	0.941748	-9.9289	18	19	18	CDS
rno-miR-146a-5p	XM_017593880	Casz1	TGAGAACTGAATTCCATGGGTT#ACCCTGGACCAAATTCAGTTCTTC#.(((((((((((((((.((((.#))))))))....))))))))))).	54	78	1	-23.3	1	0.00189398	0.515	0	0	-3.79332	19	24	11	5UTR
rno-miR-146a-5p	XM_039085348	Tbc1d24	TGAGAACTGAATTCCATGGGTT#TCCTGGGGATTTAGGTTCTTT#.((((((((((((((..(((..#)))..))))))))).))))).	5135	5156	1	-18.9	1	0.00185871	0.515	0	0	-4.02637	17	21	9	3UTR
rno-miR-146a-5p	XM_039092863	Vstm2a	TGAGAACTGAATTCCATGGGTT#CCCGTGGAATTTTTCTTG#.(((((..((((((((((((..#))))))))))))))))).	1559	1577	1	-21.1	0	0.00185511	0.529	0	0	-7.65065	17	18	17	3UTR
rno-miR-146a-5p	XM_006234027	Gapvd1	TGAGAACTGAATTCCATGGGTT#GATCCTCCAATCCTGGAAGGTGCAGTGGGAGGAAATGAAGCCAGGCTGCCCAACTTCGGTTCTCAC#(((((((((((.....(((((.#.)))))..))))))))))).	2814	2880	1	-20.7	1	0.00185449	0.485	0	0	-10.3988	16	20	11	CDS
rno-miR-146a-5p	XM_008761793	Gapvd1	TGAGAACTGAATTCCATGGGTT#GATCCTCCAATCCTGGAAGGTGCAGTGGGAGGAAATGAAGCCAGGCTGCCCAACTTCGGTTCTCAC#(((((((((((.....(((((.#.)))))..))))))))))).	2733	2799	1	-20.7	1	0.00185449	0.485	0	0	-10.3988	16	20	11	CDS
rno-miR-146a-5p	XM_008761795	Gapvd1	TGAGAACTGAATTCCATGGGTT#GATCCTCCAATCCTGGAAGGTGCAGTGGGAGGAAATGAAGCCAGGCTGCCCAACTTCGGTTCTCAC#(((((((((((.....(((((.#.)))))..))))))))))).	2670	2736	1	-20.7	1	0.00185449	0.485	0	0	-10.3988	16	20	11	CDS
rno-miR-146a-5p	NM_001000204	Olr229	TGAGAACTGAATTCCATGGGTT#AACCTGTGGATCTCATCTCAT#(((((..(((..((((((((((#))))))))))..)))))))).	716	737	1	-21.1	0	0.00184917	0.559	-0.10291	0.564501	-13.5538	18	21	10	CDS
rno-miR-146a-5p	NM_001106055	Mycbp2	TGAGAACTGAATTCCATGGGTT#CCCAATTGGAATGTTAGTTCTGGG#(.((((((((((((((((((..#))))..)))))).)))))))).).	8252	8276	1	-21.3	1	0.00184625	0.574	1.76381	2.04201	-5.10125	19	24	8	CDS
rno-miR-146a-5p	XM_039093190	Mycbp2	TGAGAACTGAATTCCATGGGTT#CCCAATTGGAATGTTAGTTCTGGG#(.((((((((((((((((((..#))))..)))))).)))))))).).	8255	8279	1	-21.3	1	0.00184625	0.574	0	0	-5.10125	19	24	8	CDS
rno-miR-146a-5p	XM_039093192	Mycbp2	TGAGAACTGAATTCCATGGGTT#CCCAATTGGAATGTTAGTTCTGGG#(.((((((((((((((((((..#))))..)))))).)))))))).).	8180	8204	1	-21.3	1	0.00184625	0.574	0	0	-5.10125	19	24	8	CDS
rno-miR-146a-5p	XM_039093194	Mycbp2	TGAGAACTGAATTCCATGGGTT#CCCAATTGGAATGTTAGTTCTGGG#(.((((((((((((((((((..#))))..)))))).)))))))).).	8180	8204	1	-21.3	1	0.00184625	0.574	0	0	-5.10125	19	24	8	CDS
rno-miR-146a-5p	NM_017249	Esyt1	TGAGAACTGAATTCCATGGGTT#GACCCACGTTGTTCGGGAGGATCTCAATCCCCGCTGGAATGAGGTTTTTG#.(((((((..((((((((((..#.)))).))))))..))))))).	2121	2171	1	-20.6	1	0.00184385	0.5	0.719005	1.31029	-6.09222	17	22	7	CDS
rno-miR-146a-5p	NM_012740	Th	TGAGAACTGAATTCCATGGGTT#CTGTGGAATTCGGGCTA#..((..(((((((((((((...#))))))))))))).)).	1131	1148	1	-18.6	0	0.00182278	0.5	0.896238	1.32294	-10.977	15	17	13	CDS
rno-miR-146a-5p	XM_039080515	Csmd3	TGAGAACTGAATTCCATGGGTT#CTGTGGAATTCCAGATCTCAT#(((((.(((((((((((((...#))))))))))).)).))))).	8933	8954	1	-21.8	0	0.00181811	0.588	0	0	-5.83853	18	21	11	CDS
rno-miR-146a-5p	XM_039080518	Csmd3	TGAGAACTGAATTCCATGGGTT#CTGTGGAATTCCAGATCTCAT#(((((.(((((((((((((...#))))))))))).)).))))).	8633	8654	1	-21.8	0	0.00181811	0.588	0	0	-5.83853	18	21	11	CDS
rno-miR-146a-5p	XM_039080520	Csmd3	TGAGAACTGAATTCCATGGGTT#CTGTGGAATTCCAGATCTCAT#(((((.(((((((((((((...#))))))))))).)).))))).	8344	8365	1	-21.8	0	0.00181811	0.588	0	0	-5.83853	18	21	11	CDS
rno-miR-146a-5p	NM_001001270	Olr80	TGAGAACTGAATTCCATGGGTT#ATCCACAAATTCACACTTATGGAGTCATCAGTCCTCT#.(((.((((((((((((((((.#.)))))))))))..))))).))).	315	352	1	-22.2	0	0.00181378	0.529	0	0	-7.91236	19	24	11	CDS
rno-miR-146a-5p	XM_220750	Atad5	TGAGAACTGAATTCCATGGGTT#ACCATTGGAAGTGTTCTCAA#(((((((....(((((..(((.#)))..)))))..))))))).	702	722	1	-19.8	1	0.00181115	0.662	0	0	-11.3749	15	20	7	CDS
rno-miR-146a-5p	NM_001114392	Gpr39	TGAGAACTGAATTCCATGGGTT#GCCCATGGAGTTCTACAGCATCAT#(((.....(((((((((((((.#))))))))))))).......))).	460	484	1	-22.5	0	0.00180893	0.485	0	0	-16.8469	16	24	13	CDS
rno-miR-146a-5p	XM_039080125	Tbc1d15	TGAGAACTGAATTCCATGGGTT#GGCTTTTAATCAGATTTAAAAGGGAATTTAGTTTTCT#.((((((((((((((.......#.)))))))))))))).	1665	1702	1	-18.9	1	0.00179953	0.706	0	0	-4.02637	14	16	14	CDS
rno-miR-146a-5p	NM_057156	St8sia2	TGAGAACTGAATTCCATGGGTT#GCCCTTGGAATTCAAGGCCCTCAA#((((..((((((((((.((((.#)))).))))))))).)...)))).	1043	1067	1	-22.8	0	0.00179376	0.441	0	0	-9.95757	18	24	9	CDS
rno-miR-146a-5p	XM_039080515	Csmd3	TGAGAACTGAATTCCATGGGTT#AACCCATGGGAAAGGTGTGCAGTTCA#...((((((..(((((((((((#)))))))))))........)))))).	3782	3808	1	-22.3	0	0.00178118	0.544	0	0	-10.5818	17	26	11	CDS
rno-miR-146a-5p	XM_039080518	Csmd3	TGAGAACTGAATTCCATGGGTT#AACCCATGGGAAAGGTGTGCAGTTCA#...((((((..(((((((((((#)))))))))))........)))))).	3482	3508	1	-22.3	0	0.00178118	0.544	0	0	-10.5818	17	26	11	CDS
rno-miR-146a-5p	XM_039080520	Csmd3	TGAGAACTGAATTCCATGGGTT#AACCCATGGGAAAGGTGTGCAGTTCA#...((((((..(((((((((((#)))))))))))........)))))).	3403	3429	1	-22.3	0	0.00178118	0.544	0	0	-10.5818	17	26	11	CDS
rno-miR-146a-5p	NM_001099510	Vom2r51	TGAGAACTGAATTCCATGGGTT#CCCTGGGATTCTATCTCT#.((((...((((((((.(((..#)))))))))))..)))).	304	322	1	-19.1	0	0.00177704	0.676	0.853414	0.726755	-9.55161	15	18	11	CDS
rno-miR-146a-5p	XM_008765749	Smug1	TGAGAACTGAATTCCATGGGTT#GACCCATGGAGCTCTTTTCGCAA#((.(((..((.(((((((((((#))))))))))).))..))).)).	477	500	1	-22.4	0	0.00177444	0.456	0	0	-12.1772	18	23	11	5UTR
rno-miR-146a-5p	NM_012550	Ednra	TGAGAACTGAATTCCATGGGTT#GGCCCATGGTAAGTTACTA#..((((((.....(((((((((#)))))))))..)))).)).	3426	3445	1	-17.1	1	0.00176664	0.559	0.60525	0.390114	-14.7166	15	19	9	3UTR
rno-miR-146a-5p	XM_039080480	RGD1565071	TGAGAACTGAATTCCATGGGTT#GACCCATGGGAGACTCATATTGTCAT#(((.((.(((.(((((((((((#)))))))))))...)))..)).))).	6626	6652	1	-20.2	0	0.00176601	0.574	0	0	-11.3381	19	26	11	3UTR
rno-miR-146a-5p	XM_039080481	RGD1565071	TGAGAACTGAATTCCATGGGTT#GACCCATGGGAGACTCATATTGTCAT#(((.((.(((.(((((((((((#)))))))))))...)))..)).))).	6315	6341	1	-20.2	0	0.00176601	0.574	0	0	-11.3381	19	26	11	3UTR
rno-miR-146a-5p	NM_053561	Nap1l1	TGAGAACTGAATTCCATGGGTT#AGCAGAAACACAAGGGCCGTGGGACAGTTCG#...((((((..((((((((.((#.)).)))))))))))))).	991	1022	1	-19.7	0	0.00176406	0.574	2.53317	2.31153	-10.5818	16	19	14	CDS
rno-miR-146a-5p	NM_001039163	Trarg1	TGAGAACTGAATTCCATGGGTT#GCCTTTTGACCTCAGTTCTCGG#((((((((((..((...((((.#))))...))..)))))))))).	1198	1220	1	-19.6	1	0.00176279	0.529	-0.0798251	-0.0807956	-11.0777	16	22	10	3UTR
rno-miR-146a-5p	NM_001079706	Rexo5	TGAGAACTGAATTCCATGGGTT#TGGAATTCAGATTTCTCC#.(((((((((((((((......#))))))))))..))))).	403	421	1	-18.6	1	0.00176151	0.647	1.10759	1.25001	-3.79332	15	18	10	CDS
rno-miR-146a-5p	XM_039078673	Rexo5	TGAGAACTGAATTCCATGGGTT#TGGAATTCAGATTTCTCC#.(((((((((((((((......#))))))))))..))))).	636	654	1	-18.6	1	0.00176151	0.647	0	0	-3.79332	15	18	10	CDS
rno-miR-146a-5p	NM_001106368	Pik3ap1	TGAGAACTGAATTCCATGGGTT#CCCGTGGAGTTTATGTGTCAG#(((.(..(((((((((((((..#)))))))))))))..).))).	923	944	1	-21.8	0	0.00175771	0.515	0.921088	0.840754	-10.4142	17	21	13	CDS
rno-miR-146a-5p	XM_008760414	Pik3ap1	TGAGAACTGAATTCCATGGGTT#CCCGTGGAGTTTATGTGTCAG#(((.(..(((((((((((((..#)))))))))))))..).))).	1542	1563	1	-21.8	0	0.00175771	0.515	0	0	-10.4142	17	21	13	CDS
rno-miR-146a-5p	XM_039101103	Arhgef17	TGAGAACTGAATTCCATGGGTT#AACCCAGATGACTGCCTTAAGAATTCAGTTTCTTT#.(((((((((((((...((((.#.))))...)))))))))).))).	8858	8893	1	-18.7	1	0.00174248	0.632	0	0	-4.76182	17	23	10	3UTR
rno-miR-146a-5p	XM_039101105	Arhgef17	TGAGAACTGAATTCCATGGGTT#AACCCAGATGACTGCCTTAAGAATTCAGTTTCTTT#.(((((((((((((...((((.#.))))...)))))))))).))).	8489	8524	1	-18.7	1	0.00174248	0.632	0	0	-4.76182	17	23	10	3UTR
rno-miR-146a-5p	NM_001276472	Hmgcll1	TGAGAACTGAATTCCATGGGTT#GGCCCTGAAGTTGTGTGTTTTTCCTCTGGATCCCGGTTCTCC#.((((((((...((((.(((..#.))).))))...)))))))).	1541	1583	1	-20.1	1	0.00173771	0.559	0.475182	1.01143	-11.2074	15	21	8	3UTR
rno-miR-146a-5p	XM_039110147	Yrdc	TGAGAACTGAATTCCATGGGTT#GGCCTATGGAGTTCCAAGACCTCT#.(((..((((((((((((((((#))))))))))))))..))..))).	747	771	1	-22.3	0	0.00173689	0.471	0	0	-9.81332	19	24	14	CDS
rno-miR-146a-5p	XM_008760224	Taf6l	TGAGAACTGAATTCCATGGGTT#GACCCAGGGATTGCTTCTCAC#((((((...((((((.((((((#))))))))))))..)))))).	147	168	1	-20.6	0	0.00173642	0.324	0	0	-9.08433	18	21	12	5UTR
rno-miR-146a-5p	NM_053598	Nudt4	TGAGAACTGAATTCCATGGGTT#GACCTAAGGCAATTCAGTTCTTT#.((((((((((((((.((((((#)))))).)).)))))))))))).	2495	2518	1	-24.4	1	0.00171133	0.662	2.00539	2.11502	-4.02637	20	23	12	3UTR
rno-miR-146a-5p	XM_006241282	Nudt4	TGAGAACTGAATTCCATGGGTT#GACCTAAGGCAATTCAGTTCTTT#.((((((((((((((.((((((#)))))).)).)))))))))))).	2791	2814	1	-24.4	1	0.00171133	0.662	0	0	-4.02637	20	23	12	3UTR
rno-miR-146a-5p	NM_053873	Cacna1s	TGAGAACTGAATTCCATGGGTT#GAGCGTGTTCCCAGGAATTCGGCTCAC#((((..(((((((((.((((..#.))))))))))))))))).	5480	5507	1	-21.9	0	0.00171038	0.426	0.0286161	0.441004	-10.1906	17	19	17	CDS
rno-miR-146a-5p	XM_017588741	Nav2	TGAGAACTGAATTCCATGGGTT#GACCCGGGGATTTTGTTTTTT#.((((((.(((((((.((((((#))))))))))))).)))))).	602	623	1	-19.8	1	0.00169823	0.588	0	0	-6.34001	19	21	13	5UTR
rno-miR-146a-5p	NM_203409	Ncam2	TGAGAACTGAATTCCATGGGTT#CCCGTGGAGTGAAGA#......((..((((((((((..#))))))))))..)).	1672	1687	1	-18.2	0	0.00169228	0.485	1.54447	1.44428	-17.8655	12	15	10	CDS
rno-miR-146a-5p	NM_001271326	Ddx55	TGAGAACTGAATTCCATGGGTT#GGCCCATGGGAAGCGGCACTA#..((..(((..(((((((((((#)))))))))))..)))..)).	2317	2338	1	-20.7	0	0.00167447	0.5	-0.33093	0.315972	-15.0443	16	21	11	3UTR
rno-miR-146a-5p	XM_017598485	LOC683674	TGAGAACTGAATTCCATGGGTT#AACCTATGGATCAGGGCC#...(..((((..((((((((((#))))))))))))))..).	669	687	1	-19.5	0	0.00166912	0.559	0	0	-18.7061	15	18	14	5UTR
rno-miR-146a-5p	XM_039091729	Tada2b	TGAGAACTGAATTCCATGGGTT#GGCCCAAGGAATGAGGTCTCAG#((((.(((..(((((.((((((#)))))).)))))..))))))).	2603	2625	1	-23	0	0.00166316	0.5	0	0	-10.5886	18	22	7	5UTR
rno-miR-146a-5p	NM_001105734	Dusp10	TGAGAACTGAATTCCATGGGTT#GCCCATGAGACTCACTTCTCT#.(((((.(((..(((((((((.#))))))).)).))).))))).	1831	1852	1	-19.7	0	0.0016617	0.603	0.977264	0.715252	-11.5086	17	21	7	3UTR
rno-miR-146a-5p	XM_006239979	Itgb1bp1	TGAGAACTGAATTCCATGGGTT#GGCCTGGTACTTAAGAGCATTTGCAGAGGGTTCAGTTCTCAG#((((((((((((((..((.(..#.).))..)))))))))))))).	1043	1085	1	-22.1	1	0.00165809	0.529	0	0	-4.90607	17	22	14	3UTR
rno-miR-146a-5p	XM_006239980	Itgb1bp1	TGAGAACTGAATTCCATGGGTT#GGCCTGGTACTTAAGAGCATTTGCAGAGGGTTCAGTTCTCAG#((((((((((((((..((.(..#.).))..)))))))))))))).	1073	1115	1	-22.1	1	0.00165809	0.529	0	0	-4.90607	17	22	14	3UTR
rno-miR-146a-5p	XM_039082065	Nicn1	TGAGAACTGAATTCCATGGGTT#GACTGTTACAAGCGTTATGTCGCCTGGGAGTTGTAGTTCTCT#.((((((((((((((..((((.#.)))).)))))).)))))))).	28	70	1	-22.4	1	0.00165713	0.515	0	0	-4.02637	18	22	8	5UTR
rno-miR-146a-5p	XM_039113254	LOC108351255	TGAGAACTGAATTCCATGGGTT#GGCCCATGGAAACAGTG#.....((((..(((((((((((#))))))))))).)))).	290	307	1	-20.9	0	0.00164485	0.485	0	0	-17.7329	15	17	11	CDS
rno-miR-146a-5p	XM_006235474	Zhx3	TGAGAACTGAATTCCATGGGTT#AGACCATGGGATTCAGTCTTT#.(((.((((((((((((((...#.))))))))))))))))).	4528	4549	1	-25	0	0.00163333	0.588	0	0	-7.91236	17	19	17	5UTR
rno-miR-146a-5p	NM_001114181	Mettl5	TGAGAACTGAATTCCATGGGTT#GGCCCATGGGATTCCCTCGCTGAGTCCTTAG#((((.(((((((((((((((((#))))))))))))))........))).)))).	64	95	1	-23.4	0	0.00163004	0.353	1.57535	0.827728	-8.05661	21	31	14	5UTR
rno-miR-146a-5p	XM_039106077	Olr35	TGAGAACTGAATTCCATGGGTT#AGCCCATGGCATTCAA#.......(((((.(((((((((#))))))))).))))).	3685	3701	1	-19.5	0	0.00162062	0.529	0	0	-18.3994	14	16	9	5UTR
rno-miR-146a-5p	XM_039096348	LOC108348509	TGAGAACTGAATTCCATGGGTT#GGCCCATGGAAACAGTG#.....((((..(((((((((((#))))))))))).)))).	283	300	1	-20.9	0	0.00161491	0.485	0	0	-17.7329	15	17	11	CDS
rno-miR-146a-5p	XM_002727896	Rpl35al1	TGAGAACTGAATTCCATGGGTT#GGCCCATGGAAACAGTG#.....((((..(((((((((((#))))))))))).)))).	375	392	1	-20.9	0	0.0016094	0.485	0	0	-17.7329	15	17	11	CDS
rno-miR-146a-5p	XM_017598483	LOC103690996	TGAGAACTGAATTCCATGGGTT#GGCCCATGGAAACAGTG#.....((((..(((((((((((#))))))))))).)))).	286	303	1	-20.9	0	0.0016094	0.485	0	0	-17.7329	15	17	11	CDS
rno-miR-146a-5p	XM_039111356	LOC108351058	TGAGAACTGAATTCCATGGGTT#GGCCCATGGAAACAGTG#.....((((..(((((((((((#))))))))))).)))).	288	305	1	-20.9	0	0.0016094	0.485	0	0	-17.7329	15	17	11	CDS
rno-miR-146a-5p	XM_039113377	LOC108351377	TGAGAACTGAATTCCATGGGTT#GGCCCATGGAAACAGTG#.....((((..(((((((((((#))))))))))).)))).	314	331	1	-20.9	0	0.0016094	0.485	0	0	-17.7329	15	17	11	CDS
rno-miR-146a-5p	XM_039106459	LOC108350427	TGAGAACTGAATTCCATGGGTT#GGCCCATGGAAACAGTG#.....((((..(((((((((((#))))))))))).)))).	228	245	1	-20.9	0	0.00160772	0.485	0	0	-17.7329	15	17	11	CDS
rno-miR-146a-5p	XM_039106390	Ttn	TGAGAACTGAATTCCATGGGTT#CAAGGAATTCAGTGACTCTCAT#(((((((((((((((.((....#)).))))))))))...))))).	65559	65581	1	-20.4	1	0.00160094	0.574	0	0	-4.17062	17	22	10	CDS
rno-miR-146a-5p	XM_039106434	Ttn	TGAGAACTGAATTCCATGGGTT#CAAGGAATTCAGTGACTCTCAT#(((((((((((((((.((....#)).))))))))))...))))).	60711	60733	1	-20.4	1	0.00160094	0.574	0	0	-4.17062	17	22	10	CDS
rno-miR-146a-5p	NM_001107101	Arl13b	TGAGAACTGAATTCCATGGGTT#ACCCAAAGAGAGGATTCAGTTGTCAT#(((.(((((((((((.(((((.#)))))....).)))))))))).))).	2261	2287	1	-21.2	0	0.00157597	0.647	1.03686	0.413405	-7.20265	19	26	10	3UTR
rno-miR-146a-5p	XM_039088392	Arl13b	TGAGAACTGAATTCCATGGGTT#ACCCAAAGAGAGGATTCAGTTGTCAT#(((.(((((((((((.(((((.#)))))....).)))))))))).))).	2172	2198	1	-21.2	0	0.00157597	0.647	0	0	-7.20265	19	26	10	3UTR
rno-miR-146a-5p	NM_199407	Unc5c	TGAGAACTGAATTCCATGGGTT#CCCATGGAAGACTCTCAG#(((((...(..(((((((((..#)))))))))..)))))).	1887	1905	1	-19.7	0	0.00157175	0.441	1.33997	2.02213	-13.7631	15	18	9	CDS
rno-miR-146a-5p	XM_039099173	RGD1566085	TGAGAACTGAATTCCATGGGTT#AACCCTGGACTTTGGTTAAGTCTCAC#(((((((((((.((((.(((((#))))))))).))))))....))))).	3450	3476	1	-19.9	1	0.0015679	0.603	0	0	-7.28438	20	26	9	3UTR
rno-miR-146a-5p	NM_001172159	Dis3l2	TGAGAACTGAATTCCATGGGTT#GCCCATGGATGTCAGCTCTGCAG#(((((.((((..(((((((((.#)))))))))..)))).))).)).	2032	2055	1	-25.4	0	0.00156413	0.441	1.09192	1.49646	-12.0101	18	23	9	CDS
rno-miR-146a-5p	NM_023103	Mug1	TGAGAACTGAATTCCATGGGTT#CCCATGGCGGCTTCTCC#.((((((((....(((((((..#)))))))))).))))).	3820	3837	1	-18.6	1	0.00156161	0.426	1.80933	1.03079	-12.4965	15	17	10	CDS
rno-miR-146a-5p	XM_006237282	Mug1	TGAGAACTGAATTCCATGGGTT#CCCATGGCGGCTTCTCC#.((((((((....(((((((..#)))))))))).))))).	3862	3879	1	-18.6	1	0.00156161	0.426	0	0	-12.4965	15	17	10	CDS
rno-miR-146a-5p	NM_153299	Clrn1	TGAGAACTGAATTCCATGGGTT#GGCTCCTGATACGACTTGCTGGATTTCAGTTCC#...((((((((.((((((((((#.)))))).)))).)))))))).	651	684	1	-19.7	0	0.00156086	0.574	1.65415	1.34629	-9.86134	18	22	8	CDS
rno-miR-146a-5p	NM_134341	Gykl1	TGAGAACTGAATTCCATGGGTT#GCCCTGGAAGGTTCTG#..((((((...(((((.((((.#))))))))))))))).	948	964	1	-17.8	1	0.00156054	0.456	1.6319	1.10459	-10.0807	15	16	15	CDS
rno-miR-146a-5p	XM_039101021	LOC103691165	TGAGAACTGAATTCCATGGGTT#CCCATGGAATTTCCTCTCC#.((((...((((((((((((..#))))))))))))..)))).	4647	4666	1	-22	0	0.00155097	0.456	0	0	-9.55161	16	19	12	3UTR
rno-miR-146a-5p	XM_039101022	LOC103691165	TGAGAACTGAATTCCATGGGTT#CCCATGGAATTTCCTCTCC#.((((...((((((((((((..#))))))))))))..)))).	4610	4629	1	-22	0	0.00155097	0.456	0	0	-9.55161	16	19	12	3UTR
rno-miR-146a-5p	XM_039101023	LOC103691165	TGAGAACTGAATTCCATGGGTT#CCCATGGAATTTCCTCTCC#.((((...((((((((((((..#))))))))))))..)))).	5292	5311	1	-22	0	0.00155097	0.456	0	0	-9.55161	16	19	12	3UTR
rno-miR-146a-5p	XM_039103573	LOC100360380	TGAGAACTGAATTCCATGGGTT#CCCATGGGAAGTCTCC#.(((.(((...(((((((((..#))))))))))))))).	5207	5223	1	-18.5	0	0.00155038	0.618	0	0	-13.036	15	16	15	3UTR
rno-miR-146a-5p	XM_039098190	Rhou	TGAGAACTGAATTCCATGGGTT#GCCTGGGTGGGATTAAAGTTGGTTCTCT#.((((((((((((((((((((.#))))..))))))).....))))))))).	2689	2717	1	-19.6	1	0.00154438	0.515	0	0	-3.79332	20	28	9	3UTR
rno-miR-146a-5p	XM_006246367	Shroom1	TGAGAACTGAATTCCATGGGTT#GCCCTGGGGCTTGAGTTCTCT#.(((((((.((.(((..((((.#))))..))).)).))))))).	374	395	1	-22.9	1	0.00154192	0.368	0	0	-8.42957	16	21	7	5UTR
rno-miR-146a-5p	XM_039107979	Mug2	TGAGAACTGAATTCCATGGGTT#CCCATGGCGGCTTCTCC#.((((((((....(((((((..#)))))))))).))))).	3860	3877	1	-18.6	1	0.00153476	0.426	0	0	-12.4965	15	17	10	CDS
rno-miR-146a-5p	NM_001109404	Rsu1	TGAGAACTGAATTCCATGGGTT#AGCTCTCATTCTCCTGCAAATTCCATGGGAGGCACTGGTTTCAGTTCC#...(((((((((((((((((..#.))))))))).........)))))))).	1289	1337	1	-20.4	0	0.00153283	0.574	1.67034	1.66428	-6.51454	17	28	9	3UTR
rno-miR-146a-5p	NM_001106659	Prpf4	TGAGAACTGAATTCCATGGGTT#GACCGTTCATGGCGCTTATGGGATTTAGAGGCTCAA#((((..(((((((((((((((.#.)))))))))))))))...)))).	1101	1137	1	-22.1	0	0.0015298	0.5	1.96694	2.08379	-9.95757	19	24	15	CDS
rno-miR-146a-5p	NM_053758	Plce1	TGAGAACTGAATTCCATGGGTT#CCCATTTTCAGTTCTCAC#(((((((((((....(((((..#))))).))))))))))).	8234	8252	1	-20.7	1	0.00151635	0.618	0.458712	0.427314	-10.1658	16	18	11	3UTR
rno-miR-146a-5p	NM_001106110	Dcdc2	TGAGAACTGAATTCCATGGGTT#GATGTTGGAGTTCAGTTCA#...(((((((((((((......#.))))))))))))).	3604	3623	1	-20.5	0	0.00151593	0.559	-0.301709	-0.0314049	-6.51454	13	15	13	3UTR
rno-miR-146a-5p	XM_006250015	Rgs8	TGAGAACTGAATTCCATGGGTT#GACCTCAGAGTTTAGAAGAGAGGTCTCTTTGGAATTCAGTTCC#...(((((((((((((.(((..#.))).))))))))))))).	1375	1418	1	-22	0	0.00151316	0.559	0	0	-6.51454	16	19	13	3UTR
rno-miR-146a-5p	XM_006243042	Dixdc1	TGAGAACTGAATTCCATGGGTT#AACTCAAGGACAGCAGTTCTCT#.((((((((...(((.((((((#)))))).)))...)))))))).	5373	5395	1	-22.2	1	0.00150423	0.544	0	0	-11.4405	17	22	8	3UTR
rno-miR-146a-5p	XM_017595731	Dixdc1	TGAGAACTGAATTCCATGGGTT#AACTCAAGGACAGCAGTTCTCT#.((((((((...(((.((((((#)))))).)))...)))))))).	4682	4704	1	-22.2	1	0.00150423	0.544	0	0	-11.4405	17	22	8	3UTR
rno-miR-146a-5p	NM_001191112	Ppp2r5c	TGAGAACTGAATTCCATGGGTT#AATCTATGGGAAGTTCTTAG#((((((((...(((((((((((#))))))))))))))))))).	644	664	1	-19.7	1	0.00150312	0.544	2.5599	2.37292	-9.06125	19	20	19	CDS
rno-miR-146a-5p	NM_001107064	Fads6	TGAGAACTGAATTCCATGGGTT#AGCCCGTGGTATCCAAGTTTCTCC#.(((((((.....(((((((((#)))))))))......)))).))).	921	945	1	-20.1	1	0.0014907	0.515	1.83731	1.6674	-13.5529	16	24	9	CDS
rno-miR-146a-5p	NM_001025402	Umps	TGAGAACTGAATTCCATGGGTT#GACCCCAGGAGTTCAGTTA#....(((((((((((..(((((#)))))..))))))))))).	1246	1265	1	-23.1	0	0.00147873	0.471	1.81271	1.47215	-9.77961	16	19	11	CDS
rno-miR-146a-5p	XM_039084849	Nbeal1	TGAGAACTGAATTCCATGGGTT#AGCCCGTGGAAGTGTCAGGACTG#..((..((((.(((((((((((#)))))))))))...))))..)).	3052	3075	1	-22.8	0	0.00147486	0.471	0	0	-13.8018	17	23	11	CDS
rno-miR-146a-5p	XM_039084852	Nbeal1	TGAGAACTGAATTCCATGGGTT#AGCCCGTGGAAGTGTCAGGACTG#..((..((((.(((((((((((#)))))))))))...))))..)).	2964	2987	1	-22.8	0	0.00147486	0.471	0	0	-13.8018	17	23	11	CDS
rno-miR-146a-5p	NM_001105862	Hic2	TGAGAACTGAATTCCATGGGTT#AGCCCTCGCCAGGAATCTTAGTTCTCT#.((((((((((((((.(((...#.)))))))).))))))))).	3873	3900	1	-21.4	1	0.00146361	0.471	1.544	1.20375	-4.02637	17	20	9	3UTR
rno-miR-146a-5p	NM_001099515	Vom2r49	TGAGAACTGAATTCCATGGGTT#GATCCAAATATTTTATTCAATATGTCCCTGGGATTCTATCTCT#.((((...((((((((.(((..#.)))))))))))..)))).	279	322	1	-19.2	0	0.00145913	0.676	0.97407	0.742407	-9.55161	15	19	11	CDS
rno-miR-146a-5p	NM_001025044	Ccdc146	TGAGAACTGAATTCCATGGGTT#TCCTTGGATGCCAACCTGGCTGTGGTCCAGATTCAGTTTTCG#.(((((((((((((((((((((#.)))))....))))....)))))))))))).	2303	2345	1	-21.1	1	0.00145603	0.485	0	0	-3.79332	21	31	12	CDS
rno-miR-146a-5p	XM_039108087	Ccdc146	TGAGAACTGAATTCCATGGGTT#TCCTTGGATGCCAACCTGGCTGTGGTCCAGATTCAGTTTTCG#.(((((((((((((((((((((#.)))))....))))....)))))))))))).	2325	2367	1	-21.1	1	0.00145603	0.485	0	0	-3.79332	21	31	12	CDS
rno-miR-146a-5p	XM_039108088	Ccdc146	TGAGAACTGAATTCCATGGGTT#TCCTTGGATGCCAACCTGGCTGTGGTCCAGATTCAGTTTTCG#.(((((((((((((((((((((#.)))))....))))....)))))))))))).	2096	2138	1	-21.1	1	0.00145603	0.485	0	0	-3.79332	21	31	12	CDS
rno-miR-146a-5p	XM_039108089	Ccdc146	TGAGAACTGAATTCCATGGGTT#TCCTTGGATGCCAACCTGGCTGTGGTCCAGATTCAGTTTTCG#.(((((((((((((((((((((#.)))))....))))....)))))))))))).	2057	2099	1	-21.1	1	0.00145603	0.485	0	0	-3.79332	21	31	12	CDS
rno-miR-146a-5p	NM_001009362	Pask	TGAGAACTGAATTCCATGGGTT#CCATGGAGGCAGTTATTCAT#(((((((((..((((((((...#)))))))).))))).)))).	3932	3952	1	-20.2	1	0.00145376	0.5	1.24463	0.816092	-8.00486	17	20	8	CDS
rno-miR-146a-5p	XM_008773673	LOC103694537	TGAGAACTGAATTCCATGGGTT#AGCCCTGTGGTAATTCGGA#......((((((((((((((((#))))).)))).))))))).	2462	2481	1	-18	0	0.00144947	0.574	0	0	-15.5666	16	19	7	CDS
rno-miR-146a-5p	XM_039100722	LOC103694537	TGAGAACTGAATTCCATGGGTT#AGCCCTGTGGTAATTCGGA#......((((((((((((((((#))))).)))).))))))).	2235	2254	1	-18	0	0.00144947	0.574	0	0	-15.5666	16	19	7	CDS
rno-miR-146a-5p	NM_001024293	LOC499331	TGAGAACTGAATTCCATGGGTT#GATCCAAAGGAATGGGATTCATTGAATTGGAGGAGACCTATGGAAAAGTTCTTT#.(((((((...(((((((((((#.))))))))))).))))))).	605	659	1	-22.7	1	0.00144863	0.662	1.25555	0.410226	-8.917	18	21	11	3UTR
rno-miR-146a-5p	NM_138882	Pla1a	TGAGAACTGAATTCCATGGGTT#AACCAAACTAATTATTCATGGATTCAGGGCA#...(..(((((.(((((((((.#.))))))))))))))..).	261	292	1	-18.5	0	0.0014409	0.618	1.39284	1.25522	-15.8813	15	19	14	CDS
rno-miR-146a-5p	XM_002729770	Zfp952	TGAGAACTGAATTCCATGGGTT#TGGAATAAGTTCTCAC#((((((((..((((((......#)))))).)))))))).	3188	3204	1	-17.4	1	0.00143999	0.618	0	0	-6.23647	14	16	8	3UTR
rno-miR-146a-5p	NM_001305205	Depdc1	TGAGAACTGAATTCCATGGGTT#AACTTATCTCGTAAAACTCCTAAGAAGCGTGGACTACAGTTCTCT#.((((((((...((((((..((#.))..))))))...)))))))).	519	564	1	-19.1	1	0.00143689	0.632	1.03447	0.828063	-11.2074	16	23	8	CDS
rno-miR-146a-5p	XM_039091503	LOC108348225	TGAGAACTGAATTCCATGGGTT#ACCACAGGAATTCAGTCAGTCTG#..(((((((((((((.(((((.#))).))))))))))))...))).	3343	3366	1	-19.3	1	0.00143655	0.529	0	0	-5.19005	18	23	12	3UTR
rno-miR-146a-5p	NM_031326	Tfam	TGAGAACTGAATTCCATGGGTT#AGCCCATGGACTTCT#........(((.((((((((((#)))))))))).))).	953	968	1	-18.7	0	0.00143396	0.574	0.747669	0.40284	-22.7707	13	15	10	3UTR
rno-miR-146a-5p	XM_039108876	Pkd2l1	TGAGAACTGAATTCCATGGGTT#CCCATGGAGTTTC#........((((((((((((..#)))))))))))).	3020	3033	1	-18.3	0	0.00142678	0.544	0	0	-19.4239	12	13	12	3UTR
rno-miR-146a-5p	XM_006234840	Ppip5k1	TGAGAACTGAATTCCATGGGTT#ACCTGTGGAAATCAGCCCTCC#.(((..((((.((((((((((.#)))))))))).))))..))).	4294	4315	1	-22	0	0.00142084	0.441	0	0	-12.6381	17	21	10	CDS
rno-miR-146a-5p	XM_006234844	Ppip5k1	TGAGAACTGAATTCCATGGGTT#ACCTGTGGAAATCAGCCCTCC#.(((..((((.((((((((((.#)))))))))).))))..))).	4165	4186	1	-22	0	0.00142084	0.441	0	0	-12.6381	17	21	10	CDS
rno-miR-146a-5p	XM_006234845	Ppip5k1	TGAGAACTGAATTCCATGGGTT#ACCTGTGGAAATCAGCCCTCC#.(((..((((.((((((((((.#)))))))))).))))..))).	4132	4153	1	-22	0	0.00142084	0.441	0	0	-12.6381	17	21	10	CDS
rno-miR-146a-5p	XM_006234848	Ppip5k1	TGAGAACTGAATTCCATGGGTT#ACCTGTGGAAATCAGCCCTCC#.(((..((((.((((((((((.#)))))))))).))))..))).	4069	4090	1	-22	0	0.00142084	0.441	0	0	-12.6381	17	21	10	CDS
rno-miR-146a-5p	XM_006234850	Ppip5k1	TGAGAACTGAATTCCATGGGTT#ACCTGTGGAAATCAGCCCTCC#.(((..((((.((((((((((.#)))))))))).))))..))).	3943	3964	1	-22	0	0.00142084	0.441	0	0	-12.6381	17	21	10	CDS
rno-miR-146a-5p	XM_039104959	Ppip5k1	TGAGAACTGAATTCCATGGGTT#ACCTGTGGAAATCAGCCCTCC#.(((..((((.((((((((((.#)))))))))).))))..))).	4253	4274	1	-22	0	0.00142084	0.441	0	0	-12.6381	17	21	10	CDS
rno-miR-146a-5p	XM_039110924	RGD1563405	TGAGAACTGAATTCCATGGGTT#ATCTAAGGCATAGGCTAGCAGGGAAATTTCAGTTCTCC#.((((((((((((((.((((((#.))))..)).))))..)))))))))).	155	193	1	-19.5	1	0.00141585	0.559	0	0	-4.02637	20	27	10	5UTR
rno-miR-146a-5p	NM_017286	Cyp11a1	TGAGAACTGAATTCCATGGGTT#AACTCTGGAAAGTTCTCAG#((((((((...(((((.(((((#)))))))))))))))))).	586	605	1	-19.4	1	0.0014116	0.515	0.508181	0.834958	-9.06125	18	19	18	CDS
rno-miR-146a-5p	NM_001000140	Olr92	TGAGAACTGAATTCCATGGGTT#GAATCCCAGGCCTCGAATCCTCCCATGGCTGGTTCTCAA#((((((((.....(((((((..#.)))))))..)))))))).	52	91	1	-21.7	1	0.00140093	0.559	1.38489	0.153356	-13.6972	15	19	8	CDS
rno-miR-146a-5p	XM_039103007	Negr1	TGAGAACTGAATTCCATGGGTT#ACCAAATGGAATTCATGTCTCT#.((((..((((((((((.(((.#)))..))))))))))..)))).	17470	17492	1	-20.9	0	0.0013984	0.588	0	0	-7.23797	17	22	10	3UTR
rno-miR-146a-5p	NM_001000167	Olr153	TGAGAACTGAATTCCATGGGTT#ACCTATGGATCGGTATCTCC#.(((((((((..(((((((((.#)))))))))))))).)))).	76	96	1	-22.1	1	0.00139173	0.485	0.717024	0.641276	-9.9649	18	20	14	CDS
rno-miR-146a-5p	XM_039084147	Sdhaf2	TGAGAACTGAATTCCATGGGTT#ACCTATGGGGTTGCAGA#......(((((((((((((((.#)))))))))))).))).	2390	2407	1	-18.8	0	0.00137999	0.608	0	0	-15.5666	15	17	12	3UTR
rno-miR-146a-5p	NM_199501	Cdk2	TGAGAACTGAATTCCATGGGTT#GAGCCAGATTTCGTTCGAGCCCTCCTTTGGGAAGTTCAGTTCTTC#.((((((((((((((..(((((#.))))).......)))).)))))))))).	1769	1814	1	-21.8	1	0.00137735	0.544	2.05417	1.70599	-4.02637	19	29	10	3UTR
rno-miR-146a-5p	XM_006229465	Zscan2	TGAGAACTGAATTCCATGGGTT#TGGAACTCAGTTCTCAT#((((((((((.(((((......#))))).)))))))))).	2085	2102	1	-21.6	1	0.00137178	0.5	0	0	-6.76235	15	17	10	CDS
rno-miR-146a-5p	NM_001011979	Tardbp	TGAGAACTGAATTCCATGGGTT#GATCATGATGTCATGGTGTTTGGTTCTTT#.(((((((((((.((((((...#.)))))).))))))))))).	953	982	1	-19.9	1	0.00136983	0.632	1.88041	1.74015	-5.08246	17	20	11	CDS
rno-miR-146a-5p	NM_001127497	Agk	TGAGAACTGAATTCCATGGGTT#AACCTGTGGTCAGTACTCT#.(((.(((((...(((((((((#)))))))))))))).))).	1516	1535	1	-20	0	0.00136818	0.471	0	0	-15.3731	17	19	14	3UTR
rno-miR-146a-5p	NM_001106587	Tnpo3	TGAGAACTGAATTCCATGGGTT#GATCTATGGAGTGCTTTGCTCAGTTGTACTCT#.(((((((((((((((((((((#)))))))))))).......))))))...))).	1592	1624	1	-19.7	1	0.00136667	0.529	2.14558	2.00084	-3.79332	21	32	12	CDS
rno-miR-146a-5p	XM_008762718	Foxp2	TGAGAACTGAATTCCATGGGTT#AACCCCTGGAACACAGGAGCTCAG#((((..(((..(((((.(((((#))))).)))))..)))...)))).	7338	7362	1	-20.4	0	0.00135867	0.574	0	0	-14.0249	17	24	5	3UTR
rno-miR-146a-5p	XM_039111403	Dcaf12	TGAGAACTGAATTCCATGGGTT#GCCCATGGTTTAGGCAGTTACCAG#((..(((((....((((((((.#))))))))......)))))..)).	2211	2235	1	-19.7	0	0.0013586	0.529	0	0	-17.2304	15	24	8	3UTR
rno-miR-146a-5p	XM_039111406	Dcaf12	TGAGAACTGAATTCCATGGGTT#GCCCATGGTTTAGGCAGTTACCAG#((..(((((....((((((((.#))))))))......)))))..)).	1427	1451	1	-19.7	0	0.0013586	0.529	0	0	-17.2304	15	24	8	3UTR
rno-miR-146a-5p	NM_139252	Plpp2	TGAGAACTGAATTCCATGGGTT#GGCCCGGCTCTGCTGGAAGTGGGCACGGCTGCTAAGGCCCACCGTTCAGTTCTTC#.(((((((((((....((((((#.))))))..))))))))))).	637	692	1	-20.6	1	0.00135666	0.441	0.986077	1.81757	-6.90779	17	21	11	CDS
rno-miR-146a-5p	NM_001082549	Spint2	TGAGAACTGAATTCCATGGGTT#GGCCCCAGTTCTCAG#(((((((((........(((((#)))))))))))))).	1039	1054	1	-16.9	1	0.00135506	0.471	0.309753	0.315037	-14.4661	14	15	14	3UTR
rno-miR-146a-5p	XM_039103833	RGD1306704	TGAGAACTGAATTCCATGGGTT#GGCCCGTGGAATTCAGA#......((((((((((((((((#)))))))))))))))).	255	272	1	-26.2	0	0.00135108	0.441	0	0	-15.5666	16	17	16	CDS
rno-miR-146a-5p	NM_001170606	Spink5	TGAGAACTGAATTCCATGGGTT#AACTTGTGGCTTCAGGATCTCT#.((((.(((((..(((((((((#))))))))).)))))..)))).	4121	4143	1	-18.3	0	0.0013504	0.574	0.0909634	-0.0893463	-10.3302	18	22	9	3UTR
rno-miR-146a-5p	NM_001109269	Lin28a	TGAGAACTGAATTCCATGGGTT#GGCCTTCCATGTAGAAGGTGGAATTCAAAGTTCA#...(((((((((((((((((((#)))))............))))))))))..)))).	3077	3111	1	-18	0	0.00133397	0.559	1.44572	1.778	-6.51454	19	34	10	3UTR
rno-miR-146a-5p	NM_053725	Itga6	TGAGAACTGAATTCCATGGGTT#TGGATAAGCAGTTCTCGA#(((((((((...((((......#))))....))))))))).	5088	5106	1	-17.7	1	0.00133168	0.618	0.128142	0.218352	-11.3517	13	18	9	3UTR
rno-miR-146a-5p	NM_001198676	Cyp2b2	TGAGAACTGAATTCCATGGGTT#GAACACTGAGGTGTATCCCATCCTGAGTTCAGCTCTCC#.((((.((((((((.(((((..#.)))))...)))))))).)))).	1175	1213	1	-21.8	0	0.00133066	0.5	0	0	-6.42973	17	23	8	CDS
rno-miR-146a-5p	NM_001000254	Olr343	TGAGAACTGAATTCCATGGGTT#AACCATATCCCACAATGCTTGTGGAACCCAGTTCTTC#.((((((((..((((((((((.#.))))))))))..)))))))).	263	300	1	-22.3	1	0.00132993	0.588	0.293166	0.591086	-7.86061	18	22	10	CDS
rno-miR-146a-5p	XM_006231723	RGD1560883	TGAGAACTGAATTCCATGGGTT#CCCATGGAAGTCATGTG#.....(((((.(((((((((..#))))))))).))).)).	4280	4297	1	-18.7	0	0.00132278	0.618	0	0	-16.4904	14	17	9	3UTR
rno-miR-146a-5p	NM_030874	Sgpp1	TGAGAACTGAATTCCATGGGTT#CCTATGGGAGCCATTTTCTCAT#((((((.((..(((((((((..#)))))))))..))..)))))).	1877	1899	1	-20	0	0.00132248	0.632	0	0	-9.54854	17	22	9	3UTR
rno-miR-146a-5p	NM_001002823	Wnk1	TGAGAACTGAATTCCATGGGTT#AGCCTGTGGTGTTTGGTTTTGAG#(.((((((((((.(((((((((#))))))))).)))))))))).).	10096	10119	1	-21.1	1	0.0013212	0.5	1.48148	1.43626	-6.39038	20	23	10	3UTR
rno-miR-146a-5p	NM_001199095	Wnk1	TGAGAACTGAATTCCATGGGTT#AGCCTGTGGTGTTTGGTTTTGAG#(.((((((((((.(((((((((#))))))))).)))))))))).).	10069	10092	1	-21.1	1	0.0013212	0.5	1.48148	1.43626	-6.39038	20	23	10	3UTR
rno-miR-146a-5p	NM_053794	Wnk1	TGAGAACTGAATTCCATGGGTT#AGCCTGTGGTGTTTGGTTTTGAG#(.((((((((((.(((((((((#))))))))).)))))))))).).	8572	8595	1	-21.1	1	0.0013212	0.5	1.48148	1.43626	-6.39038	20	23	10	3UTR
rno-miR-146a-5p	XM_008763212	Wnk1	TGAGAACTGAATTCCATGGGTT#AGCCTGTGGTGTTTGGTTTTGAG#(.((((((((((.(((((((((#))))))))).)))))))))).).	8773	8796	1	-21.1	1	0.0013212	0.5	0	0	-6.39038	20	23	10	3UTR
rno-miR-146a-5p	XM_039106927	Wnk1	TGAGAACTGAATTCCATGGGTT#AGCCTGTGGTGTTTGGTTTTGAG#(.((((((((((.(((((((((#))))))))).)))))))))).).	10558	10581	1	-21.1	1	0.0013212	0.5	0	0	-6.39038	20	23	10	3UTR
rno-miR-146a-5p	XM_039106941	Wnk1	TGAGAACTGAATTCCATGGGTT#AGCCTGTGGTGTTTGGTTTTGAG#(.((((((((((.(((((((((#))))))))).)))))))))).).	8707	8730	1	-21.1	1	0.0013212	0.5	0	0	-6.39038	20	23	10	3UTR
rno-miR-146a-5p	NM_022502	Ppt1	TGAGAACTGAATTCCATGGGTT#GCCCAGGAGAGAGTTCTCAT#((((((((...((((.(((((.#)))))))))..)))))))).	456	476	1	-22.3	1	0.00131183	0.529	1.92358	1.52982	-9.29429	17	20	9	CDS
rno-miR-146a-5p	XM_039082429	Thsd4	TGAGAACTGAATTCCATGGGTT#GAAAATGAGTTGTTCCCAGGAGTTCAGTTCC#...((((((((((((.((((..#.)))))))))))))))).	5484	5515	1	-25.3	0	0.00130551	0.632	0	0	-6.74759	16	18	16	3UTR
rno-miR-146a-5p	XM_039082430	Thsd4	TGAGAACTGAATTCCATGGGTT#GAAAATGAGTTGTTCCCAGGAGTTCAGTTCC#...((((((((((((.((((..#.)))))))))))))))).	6169	6200	1	-25.3	0	0.00130551	0.632	0	0	-6.74759	16	18	16	3UTR
rno-miR-146a-5p	XM_039085210	Tmc5	TGAGAACTGAATTCCATGGGTT#ACCGTCTCCTTCTCATGGACTTCGTGTTCTCC#.((((((((((.((((((((..#.)))))))).)))).)))))).	3574	3606	1	-23.1	1	0.00129293	0.471	0	0	-7.14013	18	22	8	CDS
rno-miR-146a-5p	NM_001108710	Coch	TGAGAACTGAATTCCATGGGTT#GCCAATGGCATTCAGTCTCAG#((((.(((((((.((((.(((.#))).)))).))))))))))).	360	381	1	-21.7	0	0.00128983	0.471	0	0	-9.34574	18	21	11	CDS
rno-miR-146a-5p	NM_031068	Actr3	TGAGAACTGAATTCCATGGGTT#AATCTTATGTGTATCAAAAAAGAAATGGGTTTTAGTTCTTT#.((((((((((.(((((.....#.))))).)))))))))).	1535	1576	1	-17.5	1	0.00128735	0.676	2.49092	2.07964	-7.14013	15	18	10	3UTR
rno-miR-146a-5p	NM_001106813	Crtam	TGAGAACTGAATTCCATGGGTT#GCCTTTCCAGCCAACTGTGGAAGCTTTGGTTCTCAG#(((((((((((((((((((...#.))))))))..))))))))))).	347	383	1	-22	1	0.001284	0.5	0.126678	0.16317	-3.93757	19	23	11	CDS
rno-miR-146a-5p	XM_039081045	Crtam	TGAGAACTGAATTCCATGGGTT#GCCTTTCCAGCCAACTGTGGAAGCTTTGGTTCTCAG#(((((((((((((((((((...#.))))))))..))))))))))).	344	380	1	-22	1	0.001284	0.5	0	0	-3.93757	19	23	11	CDS
rno-miR-146a-5p	XM_008769645	Rabgap1l	TGAGAACTGAATTCCATGGGTT#GCTGGAATATCCCCTGAGGTCGCTGGAGTTCTGTTTTCAA#(((((((.(((((((((((.((#.)).))).)))))))).))))))).	4579	4619	1	-20.1	1	0.00127449	0.574	0	0	-6.25121	20	25	8	5UTR
rno-miR-146a-5p	XM_006231892	Srek1	TGAGAACTGAATTCCATGGGTT#GACCCAGAGCTTTCAGTTCCAA#((.((((((((..(..((((((#))))))..)..)))))))))).	2032	2054	1	-21	0	0.00127309	0.471	0	0	-11.0995	17	22	10	3UTR
rno-miR-146a-5p	NM_001170596	Birc6	TGAGAACTGAATTCCATGGGTT#GTGGAGTTCAGTTAATCT#.((.(((((((((((((.....#)))))))))))))..)).	9460	9478	1	-18.9	0	0.00127041	0.588	1.54295	1.77324	-6.82535	15	18	13	CDS
rno-miR-146a-5p	XM_214434	Cdhr2	TGAGAACTGAATTCCATGGGTT#ACCCTGGATGCAGTCTCAC#((((.((((...((((.((((.#))))))))..)))))))).	3278	3297	1	-19	0	0.00126753	0.471	0	0	-15.4707	16	19	8	CDS
rno-miR-146a-5p	XM_039106944	Exoc4	TGAGAACTGAATTCCATGGGTT#GGCCTTTTTACAGCCACATAAGGGTTCAGGTTCTCAG#((((((((((((((.(((((((#.)))).)))..)))))))).)))))).	2647	2684	1	-21.3	1	0.00126216	0.529	0	0	-4.67302	21	27	8	3UTR
rno-miR-146a-5p	NM_080887	Txnl1	TGAGAACTGAATTCCATGGGTT#GACCATGTTTGAGGATCGCCCCGGCATTCAGTTCTA#..((((((((((.((..((((.#.)))).)).)))))))))).	310	346	1	-21.7	1	0.00125202	0.5	2.27226	2.13897	-6.47918	16	20	10	CDS
rno-miR-146a-5p	XM_006254827	Txnl1	TGAGAACTGAATTCCATGGGTT#GACCATGTTTGAGGATCGCCCCGGCATTCAGTTCTA#..((((((((((.((..((((.#.)))).)).)))))))))).	338	374	1	-21.7	1	0.00125202	0.5	0	0	-6.47918	16	20	10	CDS
rno-miR-146a-5p	NM_001011954	Cybrd1	TGAGAACTGAATTCCATGGGTT#TCTGTGGAATTTGGAGTTCTTAG#((((((((((((((((((((..#))))))))))))..)))))))).	2202	2225	1	-21.2	1	0.00123959	0.588	0.271507	0.160915	-3.93757	20	23	12	3UTR
rno-miR-146a-5p	NM_172035	Fzd2	TGAGAACTGAATTCCATGGGTT#ACTCGTGGAGGAAGTTCTACAC#((((((((...((((((((((.#))))))))))..)))))).)).	1728	1750	1	-21.1	1	0.00123094	0.397	2.43483	2.06969	-9.06125	18	22	10	CDS
rno-miR-146a-5p	XM_006249004	Azgp1	TGAGAACTGAATTCCATGGGTT#GACCCAAGTGGAGAGCAGAATTCTCAA#(((((((((..(((((((((((#))))))..)))))..)))..)))))).	453	480	1	-21.9	1	0.00122477	0.574	0	0	-8.00486	20	27	6	CDS
rno-miR-146a-5p	NM_199095	Svs1	TGAGAACTGAATTCCATGGGTT#CCTATGGGCTTCAGCTCTTT#.((((.(((((.((((((((..#)))))))).))))).)))).	1585	1605	1	-21.1	0	0.00121899	0.529	0.0887479	0.608557	-9.04109	17	20	8	CDS
rno-miR-146a-5p	NM_031076	Pcm1	TGAGAACTGAATTCCATGGGTT#AACCCTTTGAAAGCAGTTCTTC#.((((((((..(((...(((((#)))))...)))..)))))))).	3753	3775	1	-19.4	1	0.00121887	0.588	1.26927	1.43732	-8.8291	16	22	8	CDS
rno-miR-146a-5p	NM_001191752	Ccdc77	TGAGAACTGAATTCCATGGGTT#ACCCATGGAAATCAGGATCTGGC#(.(((.((((.((((((((((.#)))))))))).))))..))).).	1332	1355	1	-24.2	0	0.0012186	0.529	1.16189	1.27225	-9.82698	18	23	10	CDS
rno-miR-146a-5p	XM_006237236	Ccdc77	TGAGAACTGAATTCCATGGGTT#ACCCATGGAAATCAGGATCTGGC#(.(((.((((.((((((((((.#)))))))))).))))..))).).	1605	1628	1	-24.2	0	0.0012186	0.529	0	0	-9.82698	18	23	10	CDS
rno-miR-146a-5p	XM_039107656	Ccdc77	TGAGAACTGAATTCCATGGGTT#ACCCATGGAAATCAGGATCTGGC#(.(((.((((.((((((((((.#)))))))))).))))..))).).	1467	1490	1	-24.2	0	0.0012186	0.529	0	0	-9.82698	18	23	10	CDS
rno-miR-146a-5p	NM_031594	P2rx4	TGAGAACTGAATTCCATGGGTT#CCCATGGGAGTTTTGGC#(.((((((....((((((((..#)))))))))))))).).	1524	1541	1	-16.4	1	0.00121543	0.632	0.863631	1.12045	-13.5717	15	17	14	3UTR
rno-miR-146a-5p	NM_001134635	Nxpe1	TGAGAACTGAATTCCATGGGTT#CCCATGGAACTTTTTGTTCA#...((((.((((((((((((..#))))))))).)))..)))).	1266	1286	1	-19.3	0	0.0012082	0.544	0.611932	0.430876	-8.82818	16	20	9	CDS
rno-miR-146a-5p	XM_008766363	Scaper	TGAGAACTGAATTCCATGGGTT#AACCCATGGAATTGTGTG#.....((..(((((((((((((#)))))))))))))..)).	220	238	1	-20.9	0	0.00120654	0.662	0	0	-17.0356	15	18	13	5UTR
rno-miR-146a-5p	XM_006244144	Dlec1	TGAGAACTGAATTCCATGGGTT#GACCCGTGGTGGTCATCGATGTCCCAGCCCTTCAGTTCG#...((((((((..(((((((((#))))))))).....................)))))))).	2607	2646	1	-21.6	0	0.00119251	0.397	0	0	-11.1505	17	39	9	CDS
rno-miR-146a-5p	XM_006235033	Spef1	TGAGAACTGAATTCCATGGGTT#CCCTTGGATCAGTCTCC#.(((.(((((..((((.(((..#))).)))))))))))).	1066	1083	1	-19	0	0.00118967	0.574	0	0	-14.0839	15	17	12	5UTR
rno-miR-146a-5p	NM_001008826	RT1-T24-4	TGAGAACTGAATTCCATGGGTT#CCTGTGACATCCAGAGCCCTCAGTTCTCT#.(((((((((......(((((.#.)))))......))))))))).	1255	1284	1	-19	1	0.00118635	0.5	-0.433869	-0.096638	-13.0794	14	22	9	3UTR
rno-miR-146a-5p	NM_001000481	Olr1339	TGAGAACTGAATTCCATGGGTT#CCCATGGATAAGGCAGTTTC#...((((((...((((((((..#)))))))).....)))))).	795	815	1	-20.1	0	0.0011798	0.559	0.360882	0.891085	-13.9286	14	20	8	CDS
rno-miR-146a-5p	XM_017601097	Pcdhb6l	TGAGAACTGAATTCCATGGGTT#ATGGAATCCAGTGTCTCAT#(((((((((.(((((((.....#))))))).)))).))))).	4584	4603	1	-18.4	1	0.00117193	0.618	0	0	-5.18008	16	19	7	3UTR
rno-miR-146a-5p	XM_006231471	Cnnm2	TGAGAACTGAATTCCATGGGTT#AAGCCGAGGAGTGGGGTTCTCAA#((((((((..(((((.(((.((#)).))).)))))..)))))))).	4738	4761	1	-22.3	1	0.00116982	0.485	0	0	-6.46952	18	23	8	3UTR
rno-miR-146a-5p	XM_039106898	Clec2d	TGAGAACTGAATTCCATGGGTT#AGCCCGTGGTCAGATCTA#..(((.((((...(((((((((#))))))))))))).))).	405	423	1	-20.1	0	0.00116796	0.471	0	0	-14.3187	16	18	13	5UTR
rno-miR-146a-5p	XM_008759280	LOC103691092	TGAGAACTGAATTCCATGGGTT#CCCATCCTGAGTTCAGTTCTCC#.(((((((((((((.(((((..#)))))...))))))))))))).	999	1021	1	-26	1	0.00116747	0.529	0	0	-4.52877	18	22	13	CDS
rno-miR-146a-5p	NM_001108540	Rfesd	TGAGAACTGAATTCCATGGGTT#ACCTGAGTTCAGTTCC#...(((((((((((...((((.#))))))))))))))).	645	661	1	-17.8	0	0.00114254	0.485	1.72631	1.34224	-7.48304	15	16	15	3UTR
rno-miR-146a-5p	XM_039087649	LOC108352207	TGAGAACTGAATTCCATGGGTT#AGCCCATGGAAACAGTG#.....((((..(((((((((((#))))))))))).)))).	440	457	1	-21	0	0.00114084	0.5	0	0	-17.7329	15	17	11	CDS
rno-miR-146a-5p	NM_001108750	Cpne8	TGAGAACTGAATTCCATGGGTT#GCCTATGGAATGGCCCTCAA#((((..((..(((((((((((.#)))))))))))))..)))).	1182	1202	1	-19.6	0	0.00114001	0.544	0.839015	0.915486	-12.2565	17	20	13	CDS
rno-miR-146a-5p	NM_001108590	Epb42	TGAGAACTGAATTCCATGGGTT#AATCCATGGAATAGAGA#......((..((((((((((((#))))))))))))..)).	535	552	1	-17.5	0	0.00113459	0.559	1.11602	0.43358	-17.8655	14	17	12	CDS
rno-miR-146a-5p	XM_008766937	Pkhd1	TGAGAACTGAATTCCATGGGTT#CCTATGGAGTCAAGTTCC#...(((((..((((((((((..#))))))))))..))))).	6339	6357	1	-21.1	0	0.00113191	0.515	0	0	-8.81344	15	18	10	CDS
rno-miR-146a-5p	NM_022204	Exoc5	TGAGAACTGAATTCCATGGGTT#GCCCAGGAGTTACCTTTCGATAGGTTTTCAG#(((((((((((((((.(((((.#))))))))))).).........)))))))).	735	766	1	-18.8	1	0.00113062	0.632	2.29563	2.00691	-4.17062	20	31	11	CDS
rno-miR-146a-5p	NM_001000927	Olr606	TGAGAACTGAATTCCATGGGTT#GACTGAATTCCTTCTCTTGGGATTCAGTGATCAT#(((..(((((((((((.(((..#.))).)))))))))))..))).	26	60	1	-22.5	0	0.00112469	0.603	1.22034	0.239352	-11.0886	17	22	11	CDS
rno-miR-146a-5p	NM_001005904	Ccin	TGAGAACTGAATTCCATGGGTT#GGCCCATGGCAAGTTCA#...(((((.....(((((((((#)))))))))..))))).	923	940	1	-19.1	0	0.00111056	0.456	0.709752	1.08783	-16.2741	14	17	9	CDS
rno-miR-146a-5p	NM_012572	Grik4	TGAGAACTGAATTCCATGGGTT#ACCCTGGGTCTAGTTCTTAC#(((((((((...((((.((((.#))))))))..))))))))).	3270	3290	1	-18.8	1	0.00111016	0.574	1.08575	1.17079	-11.3517	17	20	9	3UTR
rno-miR-146a-5p	XM_006243472	Cyb5r4	TGAGAACTGAATTCCATGGGTT#GCCCAGGGAAGGCCCCAGTTCTCC#.((((((((..((((.(((((.#))))).)))).....)))))))).	604	628	1	-23.5	1	0.00111011	0.485	0	0	-8.09365	17	24	8	CDS
rno-miR-146a-5p	NM_031727	Limk1	TGAGAACTGAATTCCATGGGTT#ACCCGTGGAGTCAGAGGGTCAG#(((...(((.(((((((((((.#))))))))))))))....))).	1477	1499	1	-22.1	0	0.00110905	0.426	2.03995	1.89692	-14.2321	17	22	14	CDS
rno-miR-146a-5p	XM_006249185	Limk1	TGAGAACTGAATTCCATGGGTT#ACCCGTGGAGTCAGAGGGTCAG#(((...(((.(((((((((((.#))))))))))))))....))).	1998	2020	1	-22.1	0	0.00110905	0.426	0	0	-14.2321	17	22	14	CDS
rno-miR-146a-5p	NM_001000337	Olr614	TGAGAACTGAATTCCATGGGTT#GACTGCTATCAGCATCTTCCATGGGATTATTCTCC#.(((((...(((((((((((..#.))))))))))).))))).	740	775	1	-19.1	0	0.00110895	0.529	0.511216	0.571985	-8.70704	16	19	11	CDS
rno-miR-146a-5p	NM_001014023	Trim5	TGAGAACTGAATTCCATGGGTT#CCCATGGGAAGTTCAGAGCCAT#((.(..((((((((((((((..#))))))))..))))))..))).	1595	1617	1	-19.9	0	0.00110747	0.603	-0.0804025	0.0327509	-11.5151	17	22	8	CDS
rno-miR-146a-5p	NM_001100660	Ripor1	TGAGAACTGAATTCCATGGGTT#GCCCAGGAAGTGGTACAGTTCTCT#.((((((((..((((.(((((.#)))))))))......)))))))).	2980	3004	1	-22.6	1	0.00110362	0.456	2.26484	0.794529	-8.09365	17	24	9	CDS
rno-miR-146a-5p	XM_006255472	Ripor1	TGAGAACTGAATTCCATGGGTT#GCCCAGGAAGTGGTACAGTTCTCT#.((((((((..((((.(((((.#)))))))))......)))))))).	3091	3115	1	-22.6	1	0.00110362	0.456	0	0	-8.09365	17	24	9	CDS
rno-miR-146a-5p	XM_006255474	Ripor1	TGAGAACTGAATTCCATGGGTT#GCCCAGGAAGTGGTACAGTTCTCT#.((((((((..((((.(((((.#)))))))))......)))))))).	2895	2919	1	-22.6	1	0.00110362	0.456	0	0	-8.09365	17	24	9	CDS
rno-miR-146a-5p	XM_039095740	Mpp7	TGAGAACTGAATTCCATGGGTT#AGCCCATGGAAGTTCTG#..((((((....((((((((((#)))))))))))))))).	3715	3732	1	-21.9	1	0.00110148	0.588	0	0	-13.4275	16	17	16	3UTR
rno-miR-146a-5p	XM_039098151	Nlrc5	TGAGAACTGAATTCCATGGGTT#GCCCATGGGTTCAGAAGGTCAATCTCAG#(((((.(((((.(((((((((.#))))))))))))))........))))).	6385	6413	1	-23	0	0.00110098	0.5	0	0	-9.18534	19	28	14	CDS
rno-miR-146a-5p	NM_001271292	Hmcn1	TGAGAACTGAATTCCATGGGTT#GCCCAGGAATCAGTCTTTCAC#(((((((((.(((((.(((((.#)))))))))))))).))))).	2232	2253	1	-21.2	1	0.00109403	0.471	1.4399	1.79508	-5.41313	19	21	14	CDS
rno-miR-146a-5p	XM_039090458	Hmcn1	TGAGAACTGAATTCCATGGGTT#GCCCAGGAATCAGTCTTTCAC#(((((((((.(((((.(((((.#)))))))))))))).))))).	2223	2244	1	-21.2	1	0.00109403	0.471	0	0	-5.41313	19	21	14	CDS
rno-miR-146a-5p	XM_039109797	Ythdf2	TGAGAACTGAATTCCATGGGTT#GACTTCTCAGCATGGGGAAATAACAGTTCTCAG#(((((((((..(((((((....#.)))))))......))))))))).	1789	1822	1	-19.1	1	0.00109363	0.544	0	0	-8.00486	16	24	9	CDS
rno-miR-146a-5p	NM_134467	Rnf38	TGAGAACTGAATTCCATGGGTT#CCCATGGGATTCCTCTCT#.((((...((((((((((((..#)))))))))))).)))).	595	613	1	-24	0	0.00108066	0.412	2.0753	2.03768	-9.55161	16	18	12	CDS
rno-miR-146a-5p	XM_006238012	Rnf38	TGAGAACTGAATTCCATGGGTT#CCCATGGGATTCCTCTCT#.((((...((((((((((((..#)))))))))))).)))).	895	913	1	-24	0	0.00108066	0.412	0	0	-9.55161	16	18	12	CDS
rno-miR-146a-5p	XM_006238020	Rnf38	TGAGAACTGAATTCCATGGGTT#CCCATGGGATTCCTCTCT#.((((...((((((((((((..#)))))))))))).)))).	905	923	1	-24	0	0.00108066	0.412	0	0	-9.55161	16	18	12	CDS
rno-miR-146a-5p	XM_008763667	Rnf38	TGAGAACTGAATTCCATGGGTT#CCCATGGGATTCCTCTCT#.((((...((((((((((((..#)))))))))))).)))).	1057	1075	1	-24	0	0.00108066	0.412	0	0	-9.55161	16	18	12	CDS
rno-miR-146a-5p	XM_017593140	Rnf38	TGAGAACTGAATTCCATGGGTT#CCCATGGGATTCCTCTCT#.((((...((((((((((((..#)))))))))))).)))).	1102	1120	1	-24	0	0.00108066	0.412	0	0	-9.55161	16	18	12	CDS
rno-miR-146a-5p	XM_039097570	Nod2	TGAGAACTGAATTCCATGGGTT#AGCCTTTGGAATCAGTTCCTCC#.((((((((.((((((.(((((#))))).)))))))))))).)).	4177	4199	1	-21.9	1	0.00107489	0.559	0	0	-5.03583	19	22	12	3UTR
rno-miR-146a-5p	XM_039099866	Unc93a	TGAGAACTGAATTCCATGGGTT#AGCTTCAAAGCCTGAATGGTGCTTCCTTCATGGAGTCAGTTCTGAT#(.(((((((.((((((((((..#.))))))))))))))))).).	230	276	1	-22.4	1	0.00107118	0.529	0	0	-6.34376	18	21	17	5UTR
rno-miR-146a-5p	XM_006240283	Slc39a9	TGAGAACTGAATTCCATGGGTT#ACCCATTGGTTTTAACATGGTTCTCAC#(((((((((((..((((((((.#)))))).))..))....))))))))).	1819	1846	1	-19.3	1	0.00106204	0.559	0	0	-8.57351	19	27	9	3UTR
rno-miR-146a-5p	NM_001105980	Nvl	TGAGAACTGAATTCCATGGGTT#GATCCTGGGATTCAGAATTTAAAAGATTCTTCTCT#.(((((((((((((((.(((((#)))))))))))))))..............))))).	679	714	1	-21.2	1	0.00106104	0.632	1.96177	1.78072	-3.79332	20	35	15	CDS
rno-miR-146a-5p	NM_001044224	Spag5	TGAGAACTGAATTCCATGGGTT#AGACCATGGAGTTTGTAGATGAAGAGAGTCAAGTTGCTCAC#(((((((((((((((((((...#.))))))))))).................)))).)))).	2438	2479	1	-19.9	1	0.00106087	0.5	0.954031	0.717444	-3.93757	19	39	11	CDS
rno-miR-146a-5p	XM_006245219	Slc11a1	TGAGAACTGAATTCCATGGGTT#GCCCATGGAGCCAAGTTTC#...(((((...((((((((((.#))))))))))...))))).	1658	1677	1	-20.5	0	0.00105026	0.397	0	0	-11.6382	15	19	10	CDS
rno-miR-146a-5p	XM_006245220	Slc11a1	TGAGAACTGAATTCCATGGGTT#GCCCATGGAGCCAAGTTTC#...(((((...((((((((((.#))))))))))...))))).	1679	1698	1	-20.5	0	0.00105026	0.397	0	0	-11.6382	15	19	10	CDS
rno-miR-146a-5p	XM_006253741	Ecm2	TGAGAACTGAATTCCATGGGTT#GAAAGGCGTTTATCCCAAGGGAATCAGTTCTTT#.(((((((((.((((.((((..#.)))).)))).))))))))).	85	118	1	-23.8	1	0.00104981	0.632	0	0	-6.85115	17	21	9	5UTR
rno-miR-146a-5p	XM_017600763	LOC102548031	TGAGAACTGAATTCCATGGGTT#ACCTATTCCAGGAGTGCGTTCTCAC#(((((((...(((((.((((..#.)))))))))..))))))).	6284	6309	1	-18.8	1	0.0010473	0.559	0	0	-8.78315	16	20	9	3UTR
rno-miR-146a-5p	XM_008759541	Mef2a	TGAGAACTGAATTCCATGGGTT#AACCCAGGGAGTTCACTCGT#((((...((((((((.((((((#)))))).)))))))))))).	1278	1298	1	-21.4	0	0.00104565	0.5	0	0	-11.7343	18	20	12	CDS
rno-miR-146a-5p	XM_039080825	Mef2a	TGAGAACTGAATTCCATGGGTT#AACCCAGGGAGTTCACTCGT#((((...((((((((.((((((#)))))).)))))))))))).	1296	1316	1	-21.4	0	0.00104565	0.5	0	0	-11.7343	18	20	12	CDS
rno-miR-146a-5p	XM_039080839	Mef2a	TGAGAACTGAATTCCATGGGTT#AACCCAGGGAGTTCACTCGT#((((...((((((((.((((((#)))))).)))))))))))).	1287	1307	1	-21.4	0	0.00104565	0.5	0	0	-11.7343	18	20	12	CDS
rno-miR-146a-5p	XM_008771778	LOC100912958	TGAGAACTGAATTCCATGGGTT#ACCTGTGGATCTCATCTCAC#(((((..(((..(((((((((.#)))))))))..)))))))).	1461	1481	1	-20.2	0	0.00104304	0.618	0	0	-13.5538	17	20	9	CDS
rno-miR-146a-5p	XM_017592833	Lrrn1	TGAGAACTGAATTCCATGGGTT#GACTCTGGGATTCTGTTCA#...((((.((((((((.(((((#))))))))))))).)))).	736	755	1	-20	0	0.00104259	0.588	0	0	-8.82818	17	19	13	5UTR
rno-miR-146a-5p	XM_008764178	Zscan20	TGAGAACTGAATTCCATGGGTT#GCCTTCACTGCCCTTCCTATGGAAAGCAGTTCTTG#.((((((((..(((((((((..#.)))))))))..)))))))).	3717	3752	1	-25.5	1	0.0010423	0.515	0	0	-7.86061	17	21	9	3UTR
rno-miR-146a-5p	NM_001195564	Uaca	TGAGAACTGAATTCCATGGGTT#GACCTTGCTGGATGCCCTTGGCCATGACAGTTCTTAC#(((((((((....(((.((((.#.)))).)))......))))))))).	746	783	1	-20	1	0.00104078	0.515	1.17391	1.39692	-12.6408	16	25	9	CDS
rno-miR-146a-5p	XM_039108923	Dennd5b	TGAGAACTGAATTCCATGGGTT#AACCCATGGAAAGGGCTCAG#((((..((...(((((((((((#)))))))))))))..)))).	6191	6211	1	-23.7	0	0.00103872	0.559	0	0	-15.0812	17	20	13	3UTR
rno-miR-146a-5p	XM_039108924	Dennd5b	TGAGAACTGAATTCCATGGGTT#AACCCATGGAAAGGGCTCAG#((((..((...(((((((((((#)))))))))))))..)))).	6124	6144	1	-23.7	0	0.00103872	0.559	0	0	-15.0812	17	20	13	3UTR
rno-miR-146a-5p	XM_039108925	Dennd5b	TGAGAACTGAATTCCATGGGTT#AACCCATGGAAAGGGCTCAG#((((..((...(((((((((((#)))))))))))))..)))).	6061	6081	1	-23.7	0	0.00103872	0.559	0	0	-15.0812	17	20	13	3UTR
rno-miR-146a-5p	NM_020083	Ralgapa1	TGAGAACTGAATTCCATGGGTT#ACTCATGGGATTCT#........(((((((((((((.#))))))))))))).	4824	4838	1	-18.3	0	0.00103683	0.544	1.94778	1.79285	-19.4239	13	14	13	CDS
rno-miR-146a-5p	NM_001025012	Gin1	TGAGAACTGAATTCCATGGGTT#AACCCGTGGAGTGTAGTTACTG#..(((((((.((((((((((((#)))))))))))).))))).)).	600	622	1	-23.4	1	0.00103282	0.5	1.09804	0.923249	-6.19951	19	22	12	CDS
rno-miR-146a-5p	XM_039083782	Gin1	TGAGAACTGAATTCCATGGGTT#AACCCGTGGAGTGTAGTTACTG#..(((((((.((((((((((((#)))))))))))).))))).)).	3572	3594	1	-23.4	1	0.00103282	0.5	0	0	-6.19951	19	22	12	CDS
rno-miR-146a-5p	XM_039108599	Slc25a13	TGAGAACTGAATTCCATGGGTT#ACCCATGGAAGTTGACATCTTGTTTCAGTTAGCGG#((..(((((((((((((((((.#)))))))))).............)))))))..)).	1	36	1	-22.5	0	0.00102974	0.492	0	0	-8.52714	19	35	10	5UTR
rno-miR-146a-5p	XM_006256652	Ddx3x	TGAGAACTGAATTCCATGGGTT#GCCTGTACCAGTATCCATGGAGACCGTTCTCAG#(((((((....((((((((((.#.))))))))))...))))))).	1766	1799	1	-22.7	1	0.00101423	0.485	0	0	-11.3749	17	22	10	CDS
rno-miR-146a-5p	XM_006256653	Ddx3x	TGAGAACTGAATTCCATGGGTT#GCCTGTACCAGTATCCATGGAGACCGTTCTCAG#(((((((....((((((((((.#.))))))))))...))))))).	1773	1806	1	-22.7	1	0.00101423	0.485	0	0	-11.3749	17	22	10	CDS
rno-miR-146a-5p	NM_001191685	Rnf17	TGAGAACTGAATTCCATGGGTT#ATCCATGGGGGAAGTTGTCT#.((.((((...((((((((((.#))))))))))..)))).)).	4042	4062	1	-20	0	0.00100866	0.574	0.855342	1.20863	-11.949	16	20	10	CDS
rno-miR-146a-5p	NM_001015024	Osbpl5	TGAGAACTGAATTCCATGGGTT#AGCCCTTGGAATCAGC#......(((.((((((.(((((#))))).))))))))).	2939	2955	1	-18	0	0.00100583	0.559	2.28908	1.32098	-16.8091	14	16	9	3UTR
rno-miR-146a-5p	NM_001106266	Tjp1	TGAGAACTGAATTCCATGGGTT#CTCATGGTTTTCATTCTTAG#((((((.((((..(((((((..#)))))))..)))))))))).	5878	5898	1	-19.4	0	0.00100088	0.603	1.47348	1.79948	-10.1172	17	20	10	3UTR
rno-miR-146a-5p	NM_001100789	Ptpn13	TGAGAACTGAATTCCATGGGTT#GGCCTTGGGTTCAGTTTCTCT#.((((((((((.((((.(((((#)))))))))))))))).))).	4814	4835	1	-20	1	0.000999847	0.588	1.44044	1.33862	-7.14013	19	21	16	CDS
rno-miR-146a-5p	XM_039092276	Ptpn13	TGAGAACTGAATTCCATGGGTT#GGCCTTGGGTTCAGTTTCTCT#.((((((((((.((((.(((((#)))))))))))))))).))).	4299	4320	1	-20	1	0.000999847	0.588	0	0	-7.14013	19	21	16	CDS
rno-miR-146a-5p	XM_039089854	Zfp853	TGAGAACTGAATTCCATGGGTT#CCCATGGAGTCCAGA#......(((.((((((((((..#)))))))))).))).	3660	3675	1	-20.2	0	0.000997791	0.471	0	0	-16.8091	13	15	10	3UTR
rno-miR-146a-5p	XM_008769608	Sele	TGAGAACTGAATTCCATGGGTT#AGCCTTACTGGCTTTATCCCTGTGGGATTCGGTGGCCTCT#.(((.(((((((((((((((..#.)))))))))))))))...))).	2567	2607	1	-24.4	0	0.000992868	0.529	0	0	-7.91236	18	23	15	3UTR
rno-miR-146a-5p	NM_001134573	Ntpcr	TGAGAACTGAATTCCATGGGTT#ATGGAGTTCACTTCTTC#.(((((.((((((((((.....#)))))))))).))))).	842	859	1	-17.2	0	0.000989425	0.574	0.110554	0.294505	-5.33701	15	17	10	3UTR
rno-miR-146a-5p	NM_001081958	Gnl3l	TGAGAACTGAATTCCATGGGTT#GTGGAAGTCAGTTCA#...(((((((.((((((.....#)))))).))))))).	1593	1608	1	-17.9	0	0.000988478	0.456	0.147438	0.91405	-9.33931	13	15	7	CDS
rno-miR-146a-5p	NM_001000304	Olr477	TGAGAACTGAATTCCATGGGTT#CCTATGTCAGTGAGTTCATTCTCAA#((((((.(((((((((((((..#)))))).....))))))))))))).	19	44	1	-19.4	0	0.000978794	0.515	0.434736	0.784125	-5.48126	19	25	13	CDS
rno-miR-146a-5p	NM_001008354	Mrrf	TGAGAACTGAATTCCATGGGTT#CCCAGGAGTCAGCTCTCAC#(((((.(((.(((((.((((..#)))))))))))).))))).	1864	1883	1	-21.8	0	0.000973804	0.412	0.0469188	-0.0717275	-7.31409	17	19	12	3UTR
rno-miR-146a-5p	XM_039105267	Mrrf	TGAGAACTGAATTCCATGGGTT#CCCAGGAGTCAGCTCTCAC#(((((.(((.(((((.((((..#)))))))))))).))))).	1823	1842	1	-21.8	0	0.000973804	0.412	0	0	-7.31409	17	19	12	3UTR
rno-miR-146a-5p	XM_008773691	LOC103694554	TGAGAACTGAATTCCATGGGTT#AGCATCACCATGGAAACCATTGTCTATCTGTAAGTGGTCAGTACTCAT#((((.(((((.((((((((...#.))))))))......................))))).)))).	1510	1558	1	-19.2	0	0.000959656	0.662	0	0	-10.8814	17	42	8	3UTR
rno-miR-146a-5p	NM_138857	Prom2	TGAGAACTGAATTCCATGGGTT#ACCCATGGCAGTTCTTTCTCT#.(((((..(((((((((((((.#)))))))).))))).))))).	2879	2900	1	-23.6	0	0.000955491	0.456	1.26214	0.774689	-7.65065	18	21	8	3UTR
rno-miR-146a-5p	XM_006237338	Usp5	TGAGAACTGAATTCCATGGGTT#GCCCATGGATGCAGCCCTTAA#((((..(((...(((((((((.#)))))))))..)))..)))).	1544	1565	1	-20.6	0	0.000953229	0.515	0	0	-17.3717	16	21	9	CDS
rno-miR-146a-5p	NM_001024235	Ltn1	TGAGAACTGAATTCCATGGGTT#AACCCTGCAGTTCAGTTCTTAT#(((((((((((((.((.(((((#))))))).))))))))))))).	1968	1990	1	-23.8	1	0.000952967	0.618	1.90802	1.37922	-4.79441	20	22	13	CDS
rno-miR-146a-5p	NM_001191816	Fam120a	TGAGAACTGAATTCCATGGGTT#GAACTTAGACCCCCGAGGAATTCAGCTGTCAG#(((.(.(((((((((.((((..#.)))).))))))))).).))).	2309	2341	1	-23.8	0	0.000945325	0.5	1.81128	2.29371	-9.1036	17	22	9	CDS
rno-miR-146a-5p	XM_001055346	Iho1	TGAGAACTGAATTCCATGGGTT#TCTTTGGATCTCAGTTCTG#..((((((((..((((.(((..#))).))))..)))))))).	1774	1793	1	-19.2	1	0.000935722	0.574	0	0	-11.1286	15	19	8	CDS
rno-miR-146a-5p	XM_039101021	LOC103691165	TGAGAACTGAATTCCATGGGTT#ATACCGTGGAGTTTGGTTTTG#..(((((((((((((((((..(#)..))))))))))))))))).	7178	7199	1	-22	1	0.000935315	0.574	0	0	-4.957	18	21	17	3UTR
rno-miR-146a-5p	XM_039101022	LOC103691165	TGAGAACTGAATTCCATGGGTT#ATACCGTGGAGTTTGGTTTTG#..(((((((((((((((((..(#)..))))))))))))))))).	7141	7162	1	-22	1	0.000935315	0.574	0	0	-4.957	18	21	17	3UTR
rno-miR-146a-5p	XM_039101023	LOC103691165	TGAGAACTGAATTCCATGGGTT#ATACCGTGGAGTTTGGTTTTG#..(((((((((((((((((..(#)..))))))))))))))))).	7823	7844	1	-22	1	0.000935315	0.574	0	0	-4.957	18	21	17	3UTR
rno-miR-146a-5p	NM_001012214	Serpinb6b	TGAGAACTGAATTCCATGGGTT#ATCCAGCACAGCAGGACCAATGGGATTGTATTCTGTGGCCGGTTCTCC#.((((((((((((((((.((((#.)))).))))))))............)))))))).	1106	1154	1	-21.4	1	0.000927	0.456	0.392741	0.517991	-3.79332	20	35	8	CDS
rno-miR-146a-5p	XM_039095971	Serpinb6b	TGAGAACTGAATTCCATGGGTT#ATCCAGCACAGCAGGACCAATGGGATTGTATTCTGTGGCCGGTTCTCC#.((((((((((((((((.((((#.)))).))))))))............)))))))).	1423	1471	1	-21.4	1	0.000927	0.456	0	0	-3.79332	20	35	8	CDS
rno-miR-146a-5p	NM_001002823	Wnk1	TGAGAACTGAATTCCATGGGTT#CTATGGCTTTCCAGGTTCTCAG#(((((((((((..((((((...#))))))..)))..)))))))).	4568	4590	1	-20.5	1	0.00092233	0.588	1.05799	1.39974	-8.57351	17	22	8	CDS
rno-miR-146a-5p	NM_001199095	Wnk1	TGAGAACTGAATTCCATGGGTT#CTATGGCTTTCCAGGTTCTCAG#(((((((((((..((((((...#))))))..)))..)))))))).	4541	4563	1	-20.5	1	0.00092233	0.588	0.775857	1.26738	-8.57351	17	22	8	CDS
rno-miR-146a-5p	NM_053794	Wnk1	TGAGAACTGAATTCCATGGGTT#CTATGGCTTTCCAGGTTCTCAG#(((((((((((..((((((...#))))))..)))..)))))))).	3044	3066	1	-20.5	1	0.00092233	0.588	0.69514	1.61364	-8.57351	17	22	8	CDS
rno-miR-146a-5p	NM_199108	Hp1bp3	TGAGAACTGAATTCCATGGGTT#AGCCCAGGAGTTCTGTTTCCAA#((.((((.(((((((.((((((#))))))))))))).)))).)).	1466	1488	1	-21.7	0	0.000909931	0.485	0.854908	1.03838	-8.0418	19	22	13	CDS
rno-miR-146a-5p	NM_001108181	Acad11	TGAGAACTGAATTCCATGGGTT#GGCCTGTGGAACCTGTTCTTG#.((((((....(((((((((((#)))))))))))...)))))).	1361	1382	1	-20	1	0.000905209	0.412	2.2392	1.63687	-11.2306	17	21	11	CDS
rno-miR-146a-5p	XM_006253772	LOC102554838	TGAGAACTGAATTCCATGGGTT#AGCTCGTGGAGTCAGA#......(((.((((((((((((#))))))))))))))).	950	966	1	-18.6	0	0.000902991	0.559	0	0	-16.8091	15	16	15	CDS
rno-miR-146a-5p	XM_039103815	Tafa3	TGAGAACTGAATTCCATGGGTT#AGCCCATGGGATCTCT#.((((......(((((((((((#))))))))))))))).	2502	2518	1	-19.2	0	0.000896692	0.485	0	0	-14.6753	15	16	15	3UTR
rno-miR-146a-5p	XM_345867	Arid2	TGAGAACTGAATTCCATGGGTT#AATCCAGATTGTTCAGTCTCTCGG#((((((((((((....((((((#))))))....))))))).))))).	1836	1860	1	-19.3	1	0.000894774	0.588	0	0	-7.05204	18	24	7	CDS
rno-miR-146a-5p	XM_006248341	Btla	TGAGAACTGAATTCCATGGGTT#ACCTCAGGTTTCAGTTCTCT#.((((((((((..((..((((.#))))..)).)))))))))).	3604	3624	1	-20.9	1	0.000891347	0.588	0	0	-8.66231	16	20	10	3UTR
rno-miR-146a-5p	XM_006237149	Washc2c	TGAGAACTGAATTCCATGGGTT#AGCACATGGAAAGCAGAAACGGCCCAGGATTCTTCAGGTCTCAC#(((((.(((((.(((.((((((#.)))))))))...))))).))))).	2805	2849	1	-23	0	0.000890762	0.515	0	0	-9.41839	19	25	9	CDS
rno-miR-146a-5p	NM_001039036	Gabpb1	TGAGAACTGAATTCCATGGGTT#AAGCCATGAGCTCTCAGTTCTTG#.(((((((((...((((((.((#)).))))).)...))))))))).	1312	1335	1	-18.9	1	0.000890437	0.662	1.66261	1.28754	-11.254	17	23	9	3UTR
rno-miR-146a-5p	XM_006252664	Wnt5a	TGAGAACTGAATTCCATGGGTT#GCCCATGGAATTAATTCTGGC#(.((((...((((((((((((.#))))))))))))..)))).).	451	472	1	-21.1	0	0.000889695	0.397	0	0	-10.015	17	21	12	5UTR
rno-miR-146a-5p	NM_001007646	Fkbp9	TGAGAACTGAATTCCATGGGTT#CCACGTGGAATTTAGG#......((((((((((((((..#)).)))))))))))).	1339	1355	1	-18.8	0	0.000874773	0.529	1.39341	1.95957	-15.5666	14	16	12	CDS
rno-miR-146a-5p	XM_002729836	Mroh6	TGAGAACTGAATTCCATGGGTT#AGCCTATGGGGGCCATTCTTAT#((((((.((..(((((((((((#)))))))))))..)))))))).	1346	1368	1	-19.3	0	0.000867224	0.574	0	0	-9.54854	19	22	11	5UTR
rno-miR-146a-5p	XM_006231982	Nim1k	TGAGAACTGAATTCCATGGGTT#GACCAAAGGCTGATTTACAAGACTCTTCCTTTCTGGAGTTCAGATTCTTAA#((((((((((((((((.(((..#.)))...)))))))))).)))))).	347	398	1	-22	1	0.000867196	0.559	0	0	-3.93757	19	25	10	5UTR
rno-miR-146a-5p	NM_001108670	Tm2d1	TGAGAACTGAATTCCATGGGTT#AGCCTCCCTGATTTCAATCAAGAGCCCTGTGTGTGGAATTCCAGATTTCC#.((((.((((((((((((((((#.))))).....))))))))).)).)))).	1078	1128	1	-19.8	0	0.000867124	0.618	0.118019	-0.00632639	-5.69428	20	29	9	3UTR
rno-miR-146a-5p	NM_053332	Cubn	TGAGAACTGAATTCCATGGGTT#GGCCAACTGATCCGTTTGGAGTTCAGTTCC#...(((((((((((((((((((#.))))))..))))))))))))).	2964	2994	1	-24.5	0	0.000862293	0.515	1.14848	1.08675	-6.51454	19	23	13	CDS
rno-miR-146a-5p	NM_130737	Gucy2e	TGAGAACTGAATTCCATGGGTT#GGCCCATGGAACGGGGCTCT#.(((..(((..(((((((((((#))))))))))))))..))).	1223	1243	1	-24.7	0	0.000859884	0.441	0.460698	0.925016	-13.8806	17	20	14	CDS
rno-miR-146a-5p	XM_039107437	LOC297568	TGAGAACTGAATTCCATGGGTT#CCTGTGGAGTTCAGC#......((((((((((((((..#)))))))))))))).	1674	1689	1	-21.4	0	0.000859038	0.485	0	0	-15.5666	14	15	14	CDS
rno-miR-146a-5p	XM_039082982	Ppp4r1	TGAGAACTGAATTCCATGGGTT#CCCATGGACCAGTTTGCT#.(.((((((...((((((((..#)))))))).)))))).).	2903	2921	1	-19.9	0	0.00085742	0.456	0	0	-12.7649	15	18	8	CDS
rno-miR-146a-5p	XM_039082983	Ppp4r1	TGAGAACTGAATTCCATGGGTT#CCCATGGACCAGTTTGCT#.(.((((((...((((((((..#)))))))).)))))).).	3438	3456	1	-19.9	0	0.00085742	0.456	0	0	-12.7649	15	18	8	CDS
rno-miR-146a-5p	XM_008764657	LOC314140	TGAGAACTGAATTCCATGGGTT#GACCCTTTCCTGGCCAAATACCTTGGATTCAGTGATCAT#(((..((((((.((((.((((.#.))))))))))))))..))).	1982	2021	1	-19.2	0	0.000854709	0.603	0	0	-14.4354	17	21	14	3UTR
rno-miR-146a-5p	NM_001105826	Tubd1	TGAGAACTGAATTCCATGGGTT#AGCCGCTGGACATGGTTGTGGGCAAGGCGTGGAATATGTTCTCAT#(((((((...((((((((....#.))))))))..))))))).	1388	1433	1	-19.1	1	0.000851056	0.529	2.508	1.79952	-8.55011	15	19	8	CDS
rno-miR-146a-5p	XM_039085552	Tubd1	TGAGAACTGAATTCCATGGGTT#AGCCGCTGGACATGGTTGTGGGCAAGGCGTGGAATATGTTCTCAT#(((((((...((((((((....#.))))))))..))))))).	1437	1482	1	-19.1	1	0.000851056	0.529	0	0	-8.55011	15	19	8	CDS
rno-miR-146a-5p	XM_039106816	Cdan1	TGAGAACTGAATTCCATGGGTT#AACTTGCTGGAGTCAGTTCTCAT#(((((((((.((((((((((((#)))))).))))))))))))))).	4713	4736	1	-23.2	1	0.00084151	0.544	0	0	-5.18008	21	23	15	3UTR
rno-miR-146a-5p	XM_039084585	Ccnyl1	TGAGAACTGAATTCCATGGGTT#ACCTCAACAACATTGTTTATGGAGTTCAGAGCTTAG#((((..((((((((((((((..#.))))))))))))))..)))).	3534	3570	1	-21	0	0.000839002	0.662	0	0	-9.95757	18	22	14	3UTR
rno-miR-146a-5p	XM_237502	Foxn2	TGAGAACTGAATTCCATGGGTT#CTTGTAGGATTCAGTGTCTCAC#((((((((((((((.(((((..#))))).))))))))).))))).	3999	4021	1	-18.7	1	0.000836733	0.485	0	0	-4.67302	19	22	9	3UTR
rno-miR-146a-5p	XM_039090767	Astn1	TGAGAACTGAATTCCATGGGTT#GACCCAGGAAAGCAGGCCTCAT#((((..(((..((((.((((((#))))))))))..)))..)))).	3664	3686	1	-23.5	0	0.000836375	0.485	0	0	-14.2579	17	22	10	CDS
rno-miR-146a-5p	XM_039108511	Vom1r71	TGAGAACTGAATTCCATGGGTT#CCTGTGGAGTTACTATCCCCTTCAGGGCTGCAA#((((..((((((((((((((..#))))))))))...........))))..)).)).	1252	1285	1	-18.4	0	0.000830801	0.529	0	0	-9.95757	18	33	10	3UTR
rno-miR-146a-5p	XM_039091608	Eri2	TGAGAACTGAATTCCATGGGTT#AGCAATGGATTTGTCTATGGAATCATAGGTTCTCAC#((((((((..((((((((((..#.))))))))))....)))))))).	958	994	1	-22.1	1	0.00082995	0.632	0	0	-6.23647	18	24	10	3UTR
rno-miR-146a-5p	XM_008765742	Pced1b	TGAGAACTGAATTCCATGGGTT#AACCCAGGAGCAGTTCCCAG#((.((((((..((((.((((((#)))))))))))))))).)).	900	920	1	-20.3	0	0.000829513	0.397	0	0	-9.79544	18	20	16	5UTR
rno-miR-146a-5p	NM_001001518	Sucnr1	TGAGAACTGAATTCCATGGGTT#GACCTATGGAGATGTTCTCT#.((((((....(((((((((((#)))))))))))..)))))).	307	327	1	-22.7	1	0.00082827	0.5	1.66367	1.21115	-11.2306	17	20	11	CDS
rno-miR-146a-5p	NM_001305238	Stoml1	TGAGAACTGAATTCCATGGGTT#AACCTGTGGTAGTTCTCT#.((((((((....(((((((((#))))))))))))))))).	1468	1486	1	-20.6	1	0.000826128	0.485	-0.176172	0.116918	-12.4965	17	18	17	3UTR
rno-miR-146a-5p	NM_001012461	Dntt	TGAGAACTGAATTCCATGGGTT#GACTGAAGACAGCTGAGAAATGGTTCAGGATGGGGTTCAGAACTCTCAG#(((((.(((((((((((.....#.)))))))))))...))))).	792	841	1	-20.3	0	0.000824694	0.559	1.41449	1.05043	-5.83853	16	21	11	CDS
rno-miR-146a-5p	XM_006239775	Galnt14	TGAGAACTGAATTCCATGGGTT#GACCTGTGGGAGCAGTTTG#...((((((..(((((((((((#))))))))))).)))))).	2190	2209	1	-20.3	0	0.000824336	0.471	0	0	-10.5818	17	19	11	CDS
rno-miR-146a-5p	XM_017589771	Nell1	TGAGAACTGAATTCCATGGGTT#GACCAAAATGTATCTATGGAGGAAAAGTTCTTG#.(((((((...((((((((((.#.))))))))))....))))))).	1539	1572	1	-20.6	1	0.000821511	0.559	0	0	-8.917	17	23	10	CDS
rno-miR-146a-5p	XM_039093886	Setdb2	TGAGAACTGAATTCCATGGGTT#AGCCCATGGGAGCTAAGTA#.....(((...(((((((((((#)))))))))))....))).	3149	3168	1	-19.2	0	0.000819927	0.515	0	0	-18.7893	14	19	11	5UTR
rno-miR-146a-5p	XM_017597112	Ctns	TGAGAACTGAATTCCATGGGTT#GCCCCAGAATCCAGTTCTTG#.((((((((.((((...((((.#))))..)))).)))))))).	504	524	1	-18.6	1	0.000819284	0.544	0	0	-6.00433	16	20	8	CDS
rno-miR-146a-5p	XM_039084113	Pid1	TGAGAACTGAATTCCATGGGTT#AGCCTATGGGGGACATTCTCAT#((((((.((..(((((((((((#)))))))))))..)))))))).	126	148	1	-21.2	0	0.000816316	0.647	0	0	-9.54854	19	22	11	5UTR
rno-miR-146a-5p	XM_039100462	Ftsj1	TGAGAACTGAATTCCATGGGTT#AGCATTCACAAGCGCATCCATGGAGTGAGTTCA#...(((((..(((((((((((.#.))))))))))).))))).	1365	1398	1	-21.7	0	0.000812453	0.5	0	0	-8.81344	16	19	11	3UTR
rno-miR-146a-5p	XM_039100463	Ftsj1	TGAGAACTGAATTCCATGGGTT#AGCATTCACAAGCGCATCCATGGAGTGAGTTCA#...(((((..(((((((((((.#.))))))))))).))))).	1353	1386	1	-21.7	0	0.000812453	0.5	0	0	-8.81344	16	19	11	3UTR
rno-miR-146a-5p	NM_001270860	Slc4a7	TGAGAACTGAATTCCATGGGTT#CTCTGAAAGGAATTCAGTTTTTT#.((((((((((((((.......#.)))))))))))))).	3313	3336	1	-18.9	1	0.000806781	0.647	0	0	-4.02637	14	16	14	CDS
rno-miR-146a-5p	NM_001109501	Arhgap10	TGAGAACTGAATTCCATGGGTT#GATAAGATGGGATTCACAATTCTCAG#((((((.((((((((((.....#.))))))))))...)))))).	1363	1389	1	-18.9	0	0.000802545	0.544	1.29058	1.311	-5.48126	16	21	10	CDS
rno-miR-146a-5p	NM_001305274	Marchf6	TGAGAACTGAATTCCATGGGTT#GTGGGATGTCAGTTTTCT#.((((((((((((((((.....#))))))).))))))))).	6111	6129	1	-19.1	1	0.000798651	0.618	0.385616	0.595163	-3.79332	16	18	9	3UTR
rno-miR-146a-5p	XM_008760826	Marchf6	TGAGAACTGAATTCCATGGGTT#GTGGGATGTCAGTTTTCT#.((((((((((((((((.....#))))))).))))))))).	6121	6139	1	-19.1	1	0.000798651	0.618	0	0	-3.79332	16	18	9	3UTR
rno-miR-146a-5p	NM_139101	Alg10	TGAGAACTGAATTCCATGGGTT#GACCAAAGTCAAGACTTTTCTTAGCTTAGTTTGGAAACGTAGAGTTCAGTTCTCT#.(((((((((((((.(((..((#.))..))).))))))))))))).	1029	1084	1	-22.2	1	0.00079766	0.647	0.544701	0.818121	-4.52877	18	23	13	CDS
rno-miR-146a-5p	NM_001130541	Colec10	TGAGAACTGAATTCCATGGGTT#AGCCCATGGGGACACCAGTTA#....(((((..(((((((((((#)))))))))))....))))).	3536	3557	1	-19.7	0	0.000794424	0.559	0.0975616	0.0220801	-13.6138	16	21	11	3UTR
rno-miR-146a-5p	NM_001013894	Lilrb4	TGAGAACTGAATTCCATGGGTT#ATCCATGGGATTTGGCAGATTCAT#((((..(((((((((((((((.#)))))))))))))))....)))).	446	470	1	-19.5	0	0.000793612	0.559	0.0824183	0.0262217	-9.95757	19	24	15	CDS
rno-miR-146a-5p	XM_039081226	Mst1r	TGAGAACTGAATTCCATGGGTT#AACCCATGGATGTCAGAAGCCCTCC#.(((..((((..((((((((((#))))))))))..)))).....))).	2283	2308	1	-23	0	0.000793114	0.426	0	0	-15.9849	17	25	10	CDS
rno-miR-146a-5p	NM_001008380	Dis3l	TGAGAACTGAATTCCATGGGTT#AACCCATGGGAAAGAGTA#.....(((...(((((((((((#)))))))))))...))).	663	681	1	-18.9	0	0.000788119	0.412	0	0	-18.7893	14	18	11	CDS
rno-miR-146a-5p	NM_001134702	Meis1	TGAGAACTGAATTCCATGGGTT#CTATGGAGTTCCATTCTTG#.(((((..(((((((((((...#)))))))))))..))))).	1613	1632	1	-19.7	0	0.000783589	0.574	2.8297	2.69541	-7.65065	16	19	11	3UTR
rno-miR-146a-5p	XM_006242190	Lrrk2	TGAGAACTGAATTCCATGGGTT#AACCCATGGAACGTCTCT#.((((......(((((((((((#)))))))))))..)))).	1514	1532	1	-19.8	0	0.000783538	0.485	0	0	-14.6753	15	18	11	CDS
rno-miR-146a-5p	XM_008765689	Lrrk2	TGAGAACTGAATTCCATGGGTT#AACCCATGGAACGTCTCT#.((((......(((((((((((#)))))))))))..)))).	1514	1532	1	-19.8	0	0.000783538	0.485	0	0	-14.6753	15	18	11	CDS
rno-miR-146a-5p	XM_006234835	Ttbk2	TGAGAACTGAATTCCATGGGTT#AATCTAGATTCATCTGTGGAGATCAGTTTCTCAT#((((((((((.((((((((((.#.)))))))))).)))))).)))).	8163	8197	1	-23.6	1	0.000783339	0.691	0	0	-6.76235	20	24	10	3UTR
rno-miR-146a-5p	XM_006234837	Ttbk2	TGAGAACTGAATTCCATGGGTT#AATCTAGATTCATCTGTGGAGATCAGTTTCTCAT#((((((((((.((((((((((.#.)))))))))).)))))).)))).	8016	8050	1	-23.6	1	0.000783339	0.691	0	0	-6.76235	20	24	10	3UTR
rno-miR-146a-5p	NM_001108260	Baz2b	TGAGAACTGAATTCCATGGGTT#CTCATGGTGGTGCAGTTCTTAC#(((((((((.((((((((((..#))))))).))).))))))))).	3736	3758	1	-21.2	1	0.000782775	0.588	2.14425	2.37137	-5.18008	19	22	9	CDS
rno-miR-146a-5p	XM_039105322	Baz2b	TGAGAACTGAATTCCATGGGTT#CTCATGGTGGTGCAGTTCTTAC#(((((((((.((((((((((..#))))))).))).))))))))).	3181	3203	1	-21.2	1	0.000782775	0.588	0	0	-5.18008	19	22	9	CDS
rno-miR-146a-5p	XM_039105324	Baz2b	TGAGAACTGAATTCCATGGGTT#CTCATGGTGGTGCAGTTCTTAC#(((((((((.((((((((((..#))))))).))).))))))))).	3133	3155	1	-21.2	1	0.000782775	0.588	0	0	-5.18008	19	22	9	CDS
rno-miR-146a-5p	NM_181432	Hps6	TGAGAACTGAATTCCATGGGTT#GGCCCAGTTCAAAGCACCTTTGAGGACATCCTATGGGATTCAGGCACTCC#.(((..((((((((((((((..#.))))))))))))))...))).	2327	2377	1	-24.8	0	0.000778671	0.426	0.506694	0.723086	-9.81332	17	22	14	CDS
rno-miR-146a-5p	XM_003748791	Zfp526	TGAGAACTGAATTCCATGGGTT#GGCTGTGAGATGGGAATCAGTTCTTAG#((((((((((.((((((.....#.)))))).)))))))))).	3159	3186	1	-20.8	1	0.000772533	0.471	0	0	-6.76235	16	19	10	3UTR
rno-miR-146a-5p	XM_006228514	Zfp526	TGAGAACTGAATTCCATGGGTT#GGCTGTGAGATGGGAATCAGTTCTTAG#((((((((((.((((((.....#.)))))).)))))))))).	3816	3843	1	-20.8	1	0.000772533	0.471	0	0	-6.76235	16	19	10	3UTR
rno-miR-146a-5p	XM_006228517	Zfp526	TGAGAACTGAATTCCATGGGTT#GGCTGTGAGATGGGAATCAGTTCTTAG#((((((((((.((((((.....#.)))))).)))))))))).	3337	3364	1	-20.8	1	0.000772533	0.471	0	0	-6.76235	16	19	10	3UTR
rno-miR-146a-5p	XM_039093560	Zfp526	TGAGAACTGAATTCCATGGGTT#GGCTGTGAGATGGGAATCAGTTCTTAG#((((((((((.((((((.....#.)))))).)))))))))).	3522	3549	1	-20.8	1	0.000772533	0.471	0	0	-6.76235	16	19	10	3UTR
rno-miR-146a-5p	NM_001108434	Fech	TGAGAACTGAATTCCATGGGTT#GCCCCAGGCGCATAGCCTAATAAACGTGTGGAAGTTCAGTCCTCG#.(((.(((((((((((((.(((#.))).))))))).)))))).))).	2168	2213	1	-21.8	0	0.000764801	0.574	1.79742	1.47173	-7.91236	19	24	7	3UTR
rno-miR-146a-5p	XM_006254850	Fech	TGAGAACTGAATTCCATGGGTT#GCCCCAGGCGCATAGCCTAATAAACGTGTGGAAGTTCAGTCCTCG#.(((.(((((((((((((.(((#.))).))))))).)))))).))).	2489	2534	1	-21.8	0	0.000764801	0.574	0	0	-7.91236	19	24	7	3UTR
rno-miR-146a-5p	NM_001170347	Pcnx1	TGAGAACTGAATTCCATGGGTT#GACCCAGGAATTGAAGAAAGGATCAGTTGCCTCT#.((((((((((((((.((((((#)))))))))))...........))))))..))).	7868	7902	1	-19.7	1	0.000762559	0.618	0.395139	0.378723	-4.02637	20	34	11	3UTR
rno-miR-146a-5p	NM_001107986	Srrm1	TGAGAACTGAATTCCATGGGTT#CCCATGGAACAGTTCC#...((((((..(((((((((..#))))))))))))))).	3285	3301	1	-22.4	0	0.000753987	0.471	1.85031	2.26608	-10.5818	15	16	15	3UTR
rno-miR-146a-5p	XM_006239182	Srrm1	TGAGAACTGAATTCCATGGGTT#CCCATGGAACAGTTCC#...((((((..(((((((((..#))))))))))))))).	3432	3448	1	-22.4	0	0.000753987	0.471	0	0	-10.5818	15	16	15	3UTR
rno-miR-146a-5p	XM_006239185	Srrm1	TGAGAACTGAATTCCATGGGTT#CCCATGGAACAGTTCC#...((((((..(((((((((..#))))))))))))))).	3387	3403	1	-22.4	0	0.000753987	0.471	0	0	-10.5818	15	16	15	3UTR
rno-miR-146a-5p	NM_138542	Rhov	TGAGAACTGAATTCCATGGGTT#AACCCCTGGGACTCAGTTCTCT#.(((((((((.(((((.(((((#))))).))))).))))))))).	939	961	1	-28	1	0.000749981	0.426	1.24411	1.39737	-6.6181	19	22	9	3UTR
rno-miR-146a-5p	NM_023961	Fgf20	TGAGAACTGAATTCCATGGGTT#ATCCTGGAATTCAT#.......(((((((((.((((.#))))))))))))).	288	302	1	-15.5	0	0.00074955	0.426	2.24041	1.89224	-17.1102	13	14	13	CDS
rno-miR-146a-5p	NM_001109076	Nectin4	TGAGAACTGAATTCCATGGGTT#GCCTGTGGTTCTGGAAAGTTCTCT#.(((((((.....((((((((.#))))))))........))))))).	2879	2903	1	-19.5	1	0.000749125	0.515	-0.0643954	-0.140652	-13.5529	15	24	8	3UTR
rno-miR-146a-5p	XM_017598898	Nectin4	TGAGAACTGAATTCCATGGGTT#GCCTGTGGTTCTGGAAAGTTCTCT#.(((((((.....((((((((.#))))))))........))))))).	3476	3500	1	-19.5	1	0.000749125	0.515	0	0	-13.5529	15	24	8	3UTR
rno-miR-146a-5p	XM_039090983	Nectin4	TGAGAACTGAATTCCATGGGTT#GCCTGTGGTTCTGGAAAGTTCTCT#.(((((((.....((((((((.#))))))))........))))))).	3402	3426	1	-19.5	1	0.000749125	0.515	0	0	-13.5529	15	24	8	3UTR
rno-miR-146a-5p	NM_001105827	Mtmr4	TGAGAACTGAATTCCATGGGTT#CCCTCTAGTTGATTAGCACTATCTTCTGTGGAGTTTGGTTCA#...(((((((((((((((((..#.))))))))))))))))).	4154	4196	1	-21.5	0	0.00074898	0.603	1.18482	1.12091	-6.51454	17	19	17	3UTR
rno-miR-146a-5p	NM_001024803	Lrrc63	TGAGAACTGAATTCCATGGGTT#GGCCTTTGGAGTTCAGTA#.....(((((((((((.(((((#))))).))))))))))).	2180	2198	1	-22.2	0	0.000744316	0.515	0.683441	0.228179	-13.6656	16	18	11	3UTR
rno-miR-146a-5p	NM_023970	Trpv4	TGAGAACTGAATTCCATGGGTT#GCCCATGGATTCGTTGTTCG#...((((((((.(((((((((.#)))))))))))))..)))).	398	418	1	-21.2	0	0.000742809	0.412	2.26009	1.42085	-9.86134	17	20	13	CDS
rno-miR-146a-5p	NM_001271333	Prelid2	TGAGAACTGAATTCCATGGGTT#GCCTCACGTGGACACAGTATGCATCCATGAGGGAAGAGTCAGTTTTCC#.(((((((((.((((((((((.#.))))))...))))...))))))))).	331	379	1	-19.4	1	0.000733141	0.529	1.20575	1.0966	-6.6181	19	27	9	CDS
rno-miR-146a-5p	XM_006237282	Mug1	TGAGAACTGAATTCCATGGGTT#CCTGTGGAGTTCAGC#......((((((((((((((..#)))))))))))))).	1677	1692	1	-21.4	0	0.000730037	0.485	0	0	-15.5666	14	15	14	CDS
rno-miR-146a-5p	XM_039084979	Usp43	TGAGAACTGAATTCCATGGGTT#GCCCTGGAATTCCTGCTCT#.(((....((((((((.((((.#))))))))))))...))).	589	608	1	-19.8	0	0.000710479	0.471	0	0	-13.6706	15	19	12	CDS
rno-miR-146a-5p	NM_134379	UST4r	TGAGAACTGAATTCCATGGGTT#AGCCCTAAATTCCTAACCATGGTGACAGTTCTTG#.((((((((....((((((...#.))))))...)))))))).	855	889	1	-20.7	1	0.000707372	0.515	0.428941	0.427311	-12.4965	14	19	8	CDS
rno-miR-146a-5p	NM_001191583	Tdrd6	TGAGAACTGAATTCCATGGGTT#GGCCCGTAAAGCTTCAGAAGCCCCTGGAACCTTCAGTTCA#...(((((((((((((.(((((#.))))).)))))..)))))))).	2890	2930	1	-23.6	0	0.000706981	0.471	0	0	-6.51454	18	23	8	CDS
rno-miR-146a-5p	XM_039105048	Pax1	TGAGAACTGAATTCCATGGGTT#AACCCAGGAACCCAGGAGGCTCT#.(((..(((..((((.((((((#))))))))))..)))....))).	2324	2347	1	-19	0	0.000705021	0.515	0	0	-14.1137	16	23	10	3UTR
rno-miR-146a-5p	XM_039111806	Fosl2	TGAGAACTGAATTCCATGGGTT#CCCTCGGGGTTTGTTCTCGT#(((((((.(((((((..(((..#)))..)))))))))))))).	7098	7118	1	-20.3	1	0.00069818	0.647	0	0	-6.48426	17	20	14	3UTR
rno-miR-146a-5p	NM_001100987	Aqr	TGAGAACTGAATTCCATGGGTT#AGCTTGAGGAATTCAGAGCTTC#.(((..(((((((((.((((((#)))))).)))))))))..))).	3143	3165	1	-18.7	0	0.000697085	0.544	1.91697	1.99494	-10.0464	18	22	9	CDS
rno-miR-146a-5p	XM_006234753	Meis2	TGAGAACTGAATTCCATGGGTT#GCTGTGGAATTGGTATTGTATGTCCATGGGATCCTCTTTTCTCAG#((((((..((((((((((((..#.))))))))))..))..)))))).	2654	2699	1	-21.1	0	0.000693791	0.574	0	0	-7.7949	18	24	10	3UTR
rno-miR-146a-5p	XM_006234755	Meis2	TGAGAACTGAATTCCATGGGTT#GCTGTGGAATTGGTATTGTATGTCCATGGGATCCTCTTTTCTCAG#((((((..((((((((((((..#.))))))))))..))..)))))).	2633	2678	1	-21.1	0	0.000693791	0.574	0	0	-7.7949	18	24	10	3UTR
rno-miR-146a-5p	XM_039104937	Meis2	TGAGAACTGAATTCCATGGGTT#GCTGTGGAATTGGTATTGTATGTCCATGGGATCCTCTTTTCTCAG#((((((..((((((((((((..#.))))))))))..))..)))))).	2537	2582	1	-21.1	0	0.000693791	0.574	0	0	-7.7949	18	24	10	3UTR
rno-miR-146a-5p	XM_039089189	Snx8	TGAGAACTGAATTCCATGGGTT#GACTCTGGGTTAAGGGCGTGAAGAGGCTGGTGCTGTGGGATTCGGCTCGA#((((..(((((((((((((...#.))))))))))))))))).	2439	2489	1	-20	0	0.000692332	0.456	0	0	-9.95757	17	19	17	3UTR
rno-miR-146a-5p	NM_001079895	Rbfox2	TGAGAACTGAATTCCATGGGTT#TCCAAGGGATTCGGGTTCGTAA#((.((((((((((((.((((..#)))).))))))))).))).)).	1071	1093	1	-18.9	0	0.000688183	0.515	1.44048	1.59642	-5.72816	18	22	9	CDS
rno-miR-146a-5p	XM_039104342	Rxra	TGAGAACTGAATTCCATGGGTT#TCCATTCGGTTCTCAT#((((((((((.....(((((..#))))))))))))))).	5028	5044	1	-17.1	1	0.000687657	0.643	0	0	-12.9906	15	16	15	3UTR
rno-miR-146a-5p	XM_003751162	Tbl2	TGAGAACTGAATTCCATGGGTT#AACCTTGATGAGATTGTTTTTCCCTGGGCTTCAGTTTTCT#.((((((((((.((((.(((..#.))))))).)))))))))).	2173	2213	1	-22.6	1	0.000681501	0.603	0	0	-7.14013	17	20	10	3UTR
rno-miR-146a-5p	NM_001106976	Ppl	TGAGAACTGAATTCCATGGGTT#CCATGTGCTTCAGTTCTTG#.((((((((((...(((((...#)))))...)))))))))).	2290	2309	1	-19.8	1	0.000680059	0.5	0.584029	1.04702	-9.2861	15	19	10	CDS
rno-miR-146a-5p	NM_001001002	Olr1417	TGAGAACTGAATTCCATGGGTT#GCCTGTGGGGTGCAGATGTTTCTCT#.((((((((.(((((((((((.#))))))))))).)))....))))).	279	304	1	-21.2	1	0.00067689	0.5	0.610758	0.142369	-5.03583	19	25	11	CDS
rno-miR-146a-5p	NM_001106022	Prorsd1	TGAGAACTGAATTCCATGGGTT#GACTAATGCTGCAACCATGGGATTAAGTCCCGAAGACTTTCTCGT#((((((((.((((((((((...#.)))))))))).)))...........))))).	460	505	1	-19	1	0.00066925	0.529	0.37425	0.629474	-4.99396	18	32	10	CDS
rno-miR-146a-5p	XM_039078606	Scn8a	TGAGAACTGAATTCCATGGGTT#GACCCGTGGAACTGGTTAGACTTCAGTGTCATCAT#((((((((((((((((((((((#)))))))))))..........)))))).)).))).	756	791	1	-23.2	1	0.000669217	0.559	0	0	-3.93757	22	35	11	CDS
rno-miR-146a-5p	XM_039078608	Scn8a	TGAGAACTGAATTCCATGGGTT#GACCCGTGGAACTGGTTAGACTTCAGTGTCATCAT#((((((((((((((((((((((#)))))))))))..........)))))).)).))).	756	791	1	-23.2	1	0.000669217	0.559	0	0	-3.93757	22	35	11	CDS
rno-miR-146a-5p	XM_039103933	LOC120101042	TGAGAACTGAATTCCATGGGTT#CAGGAATTCAGAGCTCAC#((((..(((((((((.((....#)))))))))))..)))).	588	606	1	-19.3	0	0.000668566	0.485	0	0	-10.1906	15	18	11	CDS
rno-miR-146a-5p	NM_031685	Gosr2	TGAGAACTGAATTCCATGGGTT#ATGGATCAGTTCTCAC#((((((((((..(((((.....#))))))))))))))).	1096	1112	1	-19.9	1	0.000667768	0.471	-0.249209	-0.0336521	-10.1092	15	16	15	3UTR
rno-miR-146a-5p	XM_017597520	Gosr2	TGAGAACTGAATTCCATGGGTT#ATGGATCAGTTCTCAC#((((((((((..(((((.....#))))))))))))))).	997	1013	1	-19.9	1	0.000667768	0.471	0	0	-10.1092	15	16	15	3UTR
rno-miR-146a-5p	XM_006230110	Gprc5b	TGAGAACTGAATTCCATGGGTT#GACCTTGAGGTTAACTCATGGATCAGTCTCC#.(((.(((((..((((((((((#.)))))))))))))))))).	1842	1873	1	-22.2	0	0.000667463	0.456	0	0	-14.0839	18	20	18	3UTR
rno-miR-146a-5p	XM_039107629	Gprc5b	TGAGAACTGAATTCCATGGGTT#GACCTTGAGGTTAACTCATGGATCAGTCTCC#.(((.(((((..((((((((((#.)))))))))))))))))).	1940	1971	1	-22.2	0	0.000667463	0.456	0	0	-14.0839	18	20	18	3UTR
rno-miR-146a-5p	NM_019346	Slc14a1	TGAGAACTGAATTCCATGGGTT#AACCCGTGGACAGG#......(((...((((((((((#))))))))))))).	820	834	1	-17.8	0	0.000661351	0.485	1.48626	1.19451	-22.9806	13	14	13	CDS
rno-miR-146a-5p	NM_001108022	RGD1304624	TGAGAACTGAATTCCATGGGTT#GGCTCACACCAAACAGCGCCTTTGGGATTTATTTCTCAT#((((((.(((((((((.((((.#.)))).))))))))).)))))).	367	406	1	-22.9	0	0.00065833	0.544	1.56215	1.23373	-5.48126	19	23	9	CDS
rno-miR-146a-5p	NM_012927	Cdh6	TGAGAACTGAATTCCATGGGTT#GATCCTGGTCTATCAGTTGTCAA#(((.((((((...(((.(((((#))))))))....)))))).))).	3018	3041	1	-19	0	0.000657168	0.618	2.06277	1.72833	-14.4303	17	23	8	3UTR
rno-miR-146a-5p	NM_001134859	Sec23ip	TGAGAACTGAATTCCATGGGTT#GGCCACGGAGTTCAGTTTCAA#((((.((((((((((.(((.(.#).))).)))))))))))))).	225	246	1	-21.4	0	0.00065679	0.397	1.64276	1.10648	-8.28966	18	21	14	CDS
rno-miR-146a-5p	NM_001107375	Pex19	TGAGAACTGAATTCCATGGGTT#CCCATGGGGCAGTGTCCAA#((.((((((..(((((((((..#))))))))))))).)))).	1883	1902	1	-18.2	0	0.000654738	0.529	0.613726	0.976935	-9.56239	17	19	13	3UTR
rno-miR-146a-5p	NM_001108789	Xpo5	TGAGAACTGAATTCCATGGGTT#GACCCAGATGGAGAAGTGTGCTCTCATGGAAGCCCTGGTTCTCGT#(((((((((..(((((((((..#.)))))))))..)..)))))))).	1986	2031	1	-21.8	1	0.000653726	0.5	1.93611	1.4137	-8.00486	18	24	9	CDS
rno-miR-146a-5p	NM_022281	Abcc1	TGAGAACTGAATTCCATGGGTT#AGCCTAAGGGAAGTTCTCAG#((((((((...((((.((((((#)))))).)))))))))))).	892	912	1	-20.1	1	0.000653652	0.485	1.28841	1.52395	-9.29429	18	20	12	CDS
rno-miR-146a-5p	XM_006241321	E2f7	TGAGAACTGAATTCCATGGGTT#GGCCCGTGGACTTCAGCTCCAT#((.((.(((((.((((((((((#)))))))))).))))).)))).	1195	1217	1	-24.1	0	0.000652521	0.485	0	0	-10.7429	19	22	10	CDS
rno-miR-146a-5p	NM_001012109	Galnt14	TGAGAACTGAATTCCATGGGTT#GACCTGTGGGAGCAGTTTG#...((((((..(((((((((((#))))))))))).)))))).	355	374	1	-20.3	0	0.000651298	0.471	0.0349011	-0.0996813	-10.5818	17	19	11	CDS
rno-miR-146a-5p	NM_001106271	Akap13	TGAGAACTGAATTCCATGGGTT#ACCCGGAAAGTCAGTTCTGAT#(.((((((((.((((..((((.#))))))))..)))))))).).	248	269	1	-19.4	1	0.00064879	0.529	0.802561	1.36102	-8.15907	17	21	8	CDS
rno-miR-146a-5p	XM_039105549	Akap13	TGAGAACTGAATTCCATGGGTT#ACCCGGAAAGTCAGTTCTGAT#(.((((((((.((((..((((.#))))))))..)))))))).).	1473	1494	1	-19.4	1	0.00064879	0.529	0	0	-8.15907	17	21	8	CDS
rno-miR-146a-5p	XM_039105554	Akap13	TGAGAACTGAATTCCATGGGTT#ACCCGGAAAGTCAGTTCTGAT#(.((((((((.((((..((((.#))))))))..)))))))).).	1472	1493	1	-19.4	1	0.00064879	0.529	0	0	-8.15907	17	21	8	CDS
rno-miR-146a-5p	XM_039105560	Akap13	TGAGAACTGAATTCCATGGGTT#ACCCGGAAAGTCAGTTCTGAT#(.((((((((.((((..((((.#))))))))..)))))))).).	1472	1493	1	-19.4	1	0.00064879	0.529	0	0	-8.15907	17	21	8	CDS
rno-miR-146a-5p	XM_039105573	Akap13	TGAGAACTGAATTCCATGGGTT#ACCCGGAAAGTCAGTTCTGAT#(.((((((((.((((..((((.#))))))))..)))))))).).	447	468	1	-19.4	1	0.00064879	0.529	0	0	-8.15907	17	21	8	CDS
rno-miR-146a-5p	NM_001108609	Pard6b	TGAGAACTGAATTCCATGGGTT#GCCCTCTGTGAAGTCTGATTGTCTGTTAGCCACTGGGAACCTCAGTTCTTAG#((((((((((.(((((..((((#.))))..)))))...)))))))))).	1604	1656	1	-21.9	1	0.000644975	0.574	0.339852	0.181598	-6.76235	19	26	10	3UTR
rno-miR-146a-5p	XM_006247533	Cdc27	TGAGAACTGAATTCCATGGGTT#AACCCTCAGAGTTCAGTTTTA#..((((((((((((...(((((#)))))...)))))))))))).	2004	2025	1	-21.2	1	0.000643682	0.574	0	0	-5.9255	17	21	12	CDS
rno-miR-146a-5p	NM_001002804	C1rl	TGAGAACTGAATTCCATGGGTT#AACCTATGGAGTTCT#........((((((((((((((#)))))))))))))).	69	84	1	-20.3	0	0.000631647	0.426	0.245538	0.602101	-19.4239	14	15	14	CDS
rno-miR-146a-5p	NM_012514	Brca1	TGAGAACTGAATTCCATGGGTT#ATGGATGTTTCAGTTCTTC#.((((((((((.(((((.....#)))))...)))))))))).	1369	1388	1	-17.7	1	0.000631337	0.632	0.745571	0.600923	-7.14013	15	19	10	CDS
rno-miR-146a-5p	XM_006233350	Cenpe	TGAGAACTGAATTCCATGGGTT#TCCATGGAATTCC#........((((((((((((..#)))))))))))).	5880	5893	1	-17.9	0	0.000629673	0.603	0	0	-19.4239	12	13	12	CDS
rno-miR-146a-5p	XM_039103858	Cenpe	TGAGAACTGAATTCCATGGGTT#TCCATGGAATTCC#........((((((((((((..#)))))))))))).	5805	5818	1	-17.9	0	0.000629673	0.603	0	0	-19.4239	12	13	12	CDS
rno-miR-146a-5p	NM_001077651	Elavl4	TGAGAACTGAATTCCATGGGTT#GACCCAAGAGGAATTCAGGAGTCTCT#.((((.(((((((((.((((((#))))))...)))))))))...)))).	317	343	1	-24.9	0	0.000628624	0.529	0.845454	0.946984	-5.92733	19	26	9	CDS
rno-miR-146a-5p	XM_006238593	Elavl4	TGAGAACTGAATTCCATGGGTT#GACCCAAGAGGAATTCAGGAGTCTCT#.((((.(((((((((.((((((#))))))...)))))))))...)))).	276	302	1	-24.9	0	0.000628624	0.529	0	0	-5.92733	19	26	9	CDS
rno-miR-146a-5p	XM_006238594	Elavl4	TGAGAACTGAATTCCATGGGTT#GACCCAAGAGGAATTCAGGAGTCTCT#.((((.(((((((((.((((((#))))))...)))))))))...)))).	443	469	1	-24.9	0	0.000628624	0.529	0	0	-5.92733	19	26	9	CDS
rno-miR-146a-5p	XM_039110515	Elavl4	TGAGAACTGAATTCCATGGGTT#GACCCAAGAGGAATTCAGGAGTCTCT#.((((.(((((((((.((((((#))))))...)))))))))...)))).	383	409	1	-24.9	0	0.000628624	0.529	0	0	-5.92733	19	26	9	CDS
rno-miR-146a-5p	XM_039110516	Elavl4	TGAGAACTGAATTCCATGGGTT#GACCCAAGAGGAATTCAGGAGTCTCT#.((((.(((((((((.((((((#))))))...)))))))))...)))).	385	411	1	-24.9	0	0.000628624	0.529	0	0	-5.92733	19	26	9	CDS
rno-miR-146a-5p	NM_001106312	Scart1	TGAGAACTGAATTCCATGGGTT#CATGGGCTAACGGTTCTCT#.((((((((...((((((....#))))))....)))))))).	206	225	1	-18.6	1	0.000627738	0.485	-0.103071	0.104768	-11.2074	14	19	8	5UTR
rno-miR-146a-5p	XM_008769639	Rasal2	TGAGAACTGAATTCCATGGGTT#ACATAGGGAATTTAGTTCTGGG#(.(((((((((((((.......#.))))))))))))).).	4197	4219	1	-18.9	1	0.000622341	0.588	0	0	-5.3343	14	17	13	3UTR
rno-miR-146a-5p	XM_017598813	Rasal2	TGAGAACTGAATTCCATGGGTT#ACATAGGGAATTTAGTTCTGGG#(.(((((((((((((.......#.))))))))))))).).	4228	4250	1	-18.9	1	0.000622341	0.588	0	0	-5.3343	14	17	13	3UTR
rno-miR-146a-5p	XM_039083777	Fbxl17	TGAGAACTGAATTCCATGGGTT#GACCTCCAGTGTGTTGGCTTCATGGGTTGTTCAGTTACTTC#.(((((((((((((((((((((#.)))).))))))..)))))))).))).	1869	1910	1	-18.7	1	0.000618459	0.544	0	0	-3.79332	21	27	8	CDS
rno-miR-146a-5p	NM_001191846	Foxo1	TGAGAACTGAATTCCATGGGTT#AGCCCTGGGTCTCAGTTTTCT#.(((((((((..((((.(((((#)))))))))..))))))))).	945	966	1	-22.6	1	0.00061735	0.426	1.72833	1.70344	-9.9649	18	21	9	CDS
rno-miR-146a-5p	NM_001106291	Nlrp10	TGAGAACTGAATTCCATGGGTT#GGCCATAAAGTACAACAGGTCATGGGATTTGGAATTCTCT#.((((((((((((((((((.((#.)).)))))))))))))..))))).	1690	1730	1	-20.7	1	0.000617075	0.647	0.71734	0.488684	-3.79332	20	25	13	CDS
rno-miR-146a-5p	NM_001191707	Plch1	TGAGAACTGAATTCCATGGGTT#GCCTGTGGAGTGATTGGCTCTCC#.((((.(((((((((((((((.#)))))))))))..)))).)))).	3708	3731	1	-20.1	0	0.000616744	0.485	2.03477	1.91228	-5.69428	19	23	11	CDS
rno-miR-146a-5p	NM_001105852	Otop3	TGAGAACTGAATTCCATGGGTT#GCCCTCATGGAAAAGTTCTCAG#((((((((...((((((((((.#))))..)))))).)))))))).	805	827	1	-21.9	1	0.000615016	0.471	0.7139	0.941897	-9.06125	18	22	8	CDS
rno-miR-146a-5p	XM_039082400	Pml	TGAGAACTGAATTCCATGGGTT#AACCAACACCTTATTTGGTCTGGGAGTTGGGATTCAGTTTTTG#.(((((((((((((((......#.))))))))))))))).	5308	5351	1	-19.6	1	0.000611325	0.544	0	0	-3.79332	15	17	15	3UTR
rno-miR-146a-5p	XM_006249926	Nek7	TGAGAACTGAATTCCATGGGTT#AACCCTGAGGTGGAATTTGTTTTCC#.((((((.((((((((((((((#)))))....))))))))))))))).	2471	2496	1	-20.2	1	0.000610706	0.603	0	0	-6.10696	20	25	15	3UTR
rno-miR-146a-5p	XM_039090897	Nek7	TGAGAACTGAATTCCATGGGTT#AACCCTGAGGTGGAATTTGTTTTCC#.((((((.((((((((((((((#)))))....))))))))))))))).	2588	2613	1	-20.2	1	0.000610706	0.603	0	0	-6.10696	20	25	15	3UTR
rno-miR-146a-5p	NM_012841	Dcc	TGAGAACTGAATTCCATGGGTT#GGCTGGAGTCGAGTTCTCAT#((((((((..((((((......#.))))))..)))))))).	2685	2705	1	-19.5	1	0.000610457	0.588	1.9342	1.49593	-6.23647	14	18	8	CDS
rno-miR-146a-5p	XM_008772087	Dcc	TGAGAACTGAATTCCATGGGTT#GGCTGGAGTCGAGTTCTCAT#((((((((..((((((......#.))))))..)))))))).	3078	3098	1	-19.5	1	0.000610457	0.588	0	0	-6.23647	14	18	8	CDS
rno-miR-146a-5p	XM_039103934	LOC120101043	TGAGAACTGAATTCCATGGGTT#CAGGAATTCAGAGCTCAC#((((..(((((((((.((....#)))))))))))..)))).	588	606	1	-19.3	0	0.000608109	0.471	0	0	-10.1906	15	18	11	CDS
rno-miR-146a-5p	NM_001134840	Cnot1	TGAGAACTGAATTCCATGGGTT#GCCCAGCTGAGTAAAGTTCTCAA#((((((((..((((..(((((.#)))))...))))..)))))))).	642	665	1	-21.7	1	0.000606747	0.618	2.21922	2.333	-7.20497	17	23	8	CDS
rno-miR-146a-5p	XM_039097544	Cnot1	TGAGAACTGAATTCCATGGGTT#GCCCAGCTGAGTAAAGTTCTCAA#((((((((..((((..(((((.#)))))...))))..)))))))).	646	669	1	-21.7	1	0.000606747	0.618	0	0	-7.20497	17	23	8	CDS
rno-miR-146a-5p	XM_039097549	Cnot1	TGAGAACTGAATTCCATGGGTT#GCCCAGCTGAGTAAAGTTCTCAA#((((((((..((((..(((((.#)))))...))))..)))))))).	646	669	1	-21.7	1	0.000606747	0.618	0	0	-7.20497	17	23	8	CDS
rno-miR-146a-5p	XM_039098731	LOC120098792	TGAGAACTGAATTCCATGGGTT#CCCGTGGGTGAAAGTTCC#...(((((....((((((((..#))))))))....))))).	32	50	1	-19.3	0	0.000604948	0.515	0	0	-14.985	13	18	8	CDS
rno-miR-146a-5p	NM_138857	Prom2	TGAGAACTGAATTCCATGGGTT#GACGTTCCTAAAAAGCTGCAGGCCGTGGCTGATCAGTTCTCC#.(((((((((...((((((.((#.)).))))))....))))))))).	717	759	1	-23.2	1	0.000601785	0.5	0.337907	0.110451	-11.254	17	24	9	CDS
rno-miR-146a-5p	XM_006238100	Fam219a	TGAGAACTGAATTCCATGGGTT#AGCAATTCCCAGGTTTCTCCAGGGCTTCAGTTCTCAC#(((((((((((.(((.((((..#.))))))).))))))))))).	2059	2096	1	-23.9	1	0.000596067	0.574	0	0	-7.51743	18	21	11	3UTR
rno-miR-146a-5p	NM_001009491	Oas1h	TGAGAACTGAATTCCATGGGTT#GCCCATGGGACAGCCTTCCTCAC#(((((((((..((((((((((.#)))))))))))))..))).))).	1267	1290	1	-19.7	1	0.000583863	0.412	0.556322	0.167414	-8.00486	19	23	13	3UTR
rno-miR-146a-5p	NM_001107835	Fbxw2	TGAGAACTGAATTCCATGGGTT#GACTTCCTCAAACTCCTTCCCCTGGAGCTCAGTTTTTAT#((((((((((.(((((.(((..#.))).))))).)))))))))).	307	346	1	-22.5	1	0.000581209	0.574	0.603214	1.02284	-6.76235	18	22	10	CDS
rno-miR-146a-5p	XM_006233976	Fbxw2	TGAGAACTGAATTCCATGGGTT#GACTTCCTCAAACTCCTTCCCCTGGAGCTCAGTTTTTAT#((((((((((.(((((.(((..#.))).))))).)))))))))).	441	480	1	-22.5	1	0.000581209	0.574	0	0	-6.76235	18	22	10	CDS
rno-miR-146a-5p	NM_001107170	Tfcp2l1	TGAGAACTGAATTCCATGGGTT#AGCCTATGGGACCCGTTTCTCAT#((((((.((..(((((((((((#)))))))))))..)).)))))).	2438	2461	1	-22.1	0	0.000573661	0.5	0.102748	0.090884	-9.54854	19	23	11	3UTR
rno-miR-146a-5p	NM_031568	Clcn7	TGAGAACTGAATTCCATGGGTT#CCTTCTGGAATCAGTTCC#...((((((.((((((.(((..#)))..)))))))))))).	1010	1028	1	-18	0	0.000571965	0.5	2.91543	2.06683	-7.75705	15	18	12	CDS
rno-miR-146a-5p	NM_001191599	Prmt9	TGAGAACTGAATTCCATGGGTT#AATCCAGGGGATCAGTATCTTG#.((((((((.(((((.((((((#)))))).))))))))).)))).	1516	1538	1	-18.8	1	0.000571953	0.632	2.03897	1.69908	-5.26888	19	22	9	CDS
rno-miR-146a-5p	XM_008769698	Rc3h1	TGAGAACTGAATTCCATGGGTT#CCTGTGGAGTTTGTTGTCC#.((.(((.((((((((((((..#))))))))))))))).)).	9075	9094	1	-19.6	0	0.000571588	0.676	0	0	-9.13898	17	19	15	3UTR
rno-miR-146a-5p	XM_008759934	Znf48	TGAGAACTGAATTCCATGGGTT#GCCCCTGAGGGTGAGGTATTGCTGTGGAGAAAGCAGTTTTCAC#(((((((((..((((((((...#.))))))))....))))))))).	4105	4148	1	-19.5	1	0.000568058	0.5	0	0	-8.00486	17	23	9	3UTR
rno-miR-146a-5p	NM_001308148	Hnf1b	TGAGAACTGAATTCCATGGGTT#AGCCCATGGAGTTTC#........((((((((((((((#)))))))))))))).	2131	2146	1	-20.3	0	0.000567264	0.559	0	0	-19.4239	14	15	14	3UTR
rno-miR-146a-5p	NM_001106952	Efhc2	TGAGAACTGAATTCCATGGGTT#GCTGGTGGGATGTTCTTG#.((((((...(((((((.(((.#))).))))))))))))).	1516	1534	1	-17	1	0.000566609	0.559	1.93605	1.68519	-8.40586	16	18	13	CDS
rno-miR-146a-5p	XM_236761	Dppa5	TGAGAACTGAATTCCATGGGTT#CCCGTGGGTGAAAGTTCC#...(((((....((((((((..#))))))))....))))).	892	910	1	-19.3	0	0.000561516	0.515	0	0	-14.985	13	18	8	CDS
rno-miR-146a-5p	XM_039081078	Fbxo22	TGAGAACTGAATTCCATGGGTT#CCACGGACAGTTCTCT#.((((((((...(((.(((...#))).))))))))))).	348	364	1	-18.8	1	0.000560777	0.515	0	0	-11.4405	14	16	11	5UTR
rno-miR-146a-5p	NM_032082	Hao2	TGAGAACTGAATTCCATGGGTT#GATTCAGTTCTCC#.((((((((((((.........#)))))))))))).	1241	1254	1	-16.2	1	0.00056015	0.559	0.901687	0.593542	-5.61866	12	13	12	CDS
rno-miR-146a-5p	XM_006245978	Cpeb4	TGAGAACTGAATTCCATGGGTT#ACCCAGGATCCGATAGTTCTCT#.((((((((...(((.(((((.#)))))))).....)))))))).	1225	1247	1	-20.4	1	0.000559925	0.588	0	0	-11.4405	16	22	8	CDS
rno-miR-146a-5p	NM_001354180	Trpm3	TGAGAACTGAATTCCATGGGTT#CCGGTGGAATTTGGAAGGGGTCATGAATCAGACTGATGCTTCTCGA#(((((((((((((((((.((..#)).))))))))))).........................)))))).	65	111	1	-19.5	1	0.000559914	0.529	0	0	-3.93757	19	46	11	CDS
rno-miR-146a-5p	NM_001100730	Nipsnap1	TGAGAACTGAATTCCATGGGTT#GGCCTGTGGAGTGGGTTCAGTGATTCTGGGGTCTCT#.(((((((((((((((((((((#))))))))))....)))))))..........)))).	1740	1776	1	-21.4	1	0.000559221	0.456	0.354802	0.38558	-3.79332	21	36	10	3UTR
rno-miR-146a-5p	XM_575081	Stpg3	TGAGAACTGAATTCCATGGGTT#AGCCCATGAGGTAGGACCCAGGGAGTCAGCTCAC#((((..(((.(((((.((((((#.)))))).)))))))))))).	1477	1511	1	-21.1	0	0.000558016	0.382	0	0	-11.4331	18	21	12	3UTR
rno-miR-146a-5p	XM_008764754	Arel1	TGAGAACTGAATTCCATGGGTT#GACCCAGGGGGCAAGTTCTCAT#((((((((...((((.((((((#))))))))))...)))))))).	7809	7831	1	-24.1	1	0.00055484	0.588	0	0	-9.29429	18	22	10	3UTR
rno-miR-146a-5p	NM_001013864	Lpp	TGAGAACTGAATTCCATGGGTT#ACCTATGGGACCTCCTTCAGTTCCTCC#.((((((((((((((((((((.#)))))))))).....)))))))).)).	1293	1320	1	-22.9	1	0.000553509	0.456	0.581817	0.759159	-3.79332	20	27	10	CDS
rno-miR-146a-5p	NM_001005895	Ddx19b	TGAGAACTGAATTCCATGGGTT#GACCTGTGGGGCAGTTGTCAG#(((.(((((..(((((((((((#)))))))))))))))).))).	2259	2280	1	-22.3	0	0.000551276	0.485	0.133827	0.158779	-11.0369	19	21	16	3UTR
rno-miR-146a-5p	XM_008772534	Ddx19b	TGAGAACTGAATTCCATGGGTT#GACCTGTGGGGCAGTTGTCAG#(((.(((((..(((((((((((#)))))))))))))))).))).	2207	2228	1	-22.3	0	0.000551276	0.485	0	0	-11.0369	19	21	16	3UTR
rno-miR-146a-5p	XM_039095005	RGD1562641	TGAGAACTGAATTCCATGGGTT#TCCATGGAATTCT#........((((((((((((..#)))))))))))).	1539	1552	1	-18.3	0	0.000549185	0.529	0	0	-19.4239	12	13	12	5UTR
rno-miR-146a-5p	NM_022294	Adgrl4	TGAGAACTGAATTCCATGGGTT#AACCAAAGAAAAACCTTAAAATTTACAGATACATGGATGAGTGTTCTCAC#(((((((.....((((((.(((#.))).)))))).....))))))).	3088	3138	1	-18.3	1	0.000547863	0.75	0.02804	-0.0496215	-14.7217	16	24	7	3UTR
rno-miR-146a-5p	XM_006246545	Mief2	TGAGAACTGAATTCCATGGGTT#AACCAAGTGACCATGGCAGAGTTCTCAC#((((((((.....((((((...#.))))))...)))))))).	343	371	1	-20.4	1	0.000546278	0.5	0	0	-13.6972	14	19	8	5UTR
rno-miR-146a-5p	NM_001004072	Pdha1	TGAGAACTGAATTCCATGGGTT#GACCCTGGAGTCAGTTATCG#.((.(((((.((((((.(((((#)))))))))))))))).)).	923	943	1	-21.5	0	0.000545602	0.544	1.7481	2.2154	-8.06785	18	20	16	CDS
rno-miR-146a-5p	NM_053572	Cdhr1	TGAGAACTGAATTCCATGGGTT#ATTTGTTGGAAGCCAGTTCTCT#.((((((((..(((((......#.)))))..)))))))).	3556	3578	1	-19.7	1	0.00054527	0.618	1.93507	1.27152	-7.86061	13	17	8	3UTR
rno-miR-146a-5p	XM_008766357	Dmxl2	TGAGAACTGAATTCCATGGGTT#AACCCTGTGGTGTTCAGTTTTTAC#((((((((((((.(((((((((#))))).)))).)))))))))))).	5707	5731	1	-25	1	0.000544413	0.647	0	0	-5.22671	21	24	12	CDS
rno-miR-146a-5p	XM_008766359	Dmxl2	TGAGAACTGAATTCCATGGGTT#AACCCTGTGGTGTTCAGTTTTTAC#((((((((((((.(((((((((#))))).)))).)))))))))))).	5706	5730	1	-25	1	0.000544413	0.647	0	0	-5.22671	21	24	12	CDS
rno-miR-146a-5p	XM_008763374	Dusp16	TGAGAACTGAATTCCATGGGTT#CCCAGGATGTTGGTTCTCT#.(((((((((..(((.((((..#)))))))..))))))))).	768	787	1	-22.4	1	0.000543721	0.515	0	0	-10.198	16	19	9	CDS
rno-miR-146a-5p	NM_207608	Trpa1	TGAGAACTGAATTCCATGGGTT#GCCTATGGCTTCAGAGCTCAT#((((..(((((..((((((((.#)))))))).)))))..)))).	2142	2163	1	-22	0	0.000543196	0.603	1.93716	1.42318	-14.5935	17	21	8	CDS
rno-miR-146a-5p	XM_008758962	Zfp61	TGAGAACTGAATTCCATGGGTT#GCCCATGGGAGACAGA#......(((..((((((((((.#))))))))))..))).	616	632	1	-20.4	0	0.000541357	0.5	0	0	-19.6338	13	16	10	CDS
rno-miR-146a-5p	XM_039112403	Wars1	TGAGAACTGAATTCCATGGGTT#ACCCTGGGTTCAGTCTCC#.(((.((((((.((((.((((.#))))))))))))))))).	2459	2477	1	-20.7	0	0.000539452	0.471	0	0	-11.2592	17	18	17	3UTR
rno-miR-146a-5p	XM_039112405	Wars1	TGAGAACTGAATTCCATGGGTT#ACCCTGGGTTCAGTCTCC#.(((.((((((.((((.((((.#))))))))))))))))).	2347	2365	1	-20.7	0	0.000539452	0.471	0	0	-11.2592	17	18	17	3UTR
rno-miR-146a-5p	NM_001004245	Esam	TGAGAACTGAATTCCATGGGTT#GCCCTTCCTGATTTGGTTCTTG#.((((((((((((....((((.#)))).....)))))))))))).	296	318	1	-17.1	1	0.0005318	0.441	0.872407	0.108009	-5.61866	16	22	12	CDS
rno-miR-146a-5p	NM_053407	Asah1	TGAGAACTGAATTCCATGGGTT#GCCCAATGGGTAGGGTTTATCACTAGATCAGTTCTGGA#(.((((((((..(((((((((.#))))).)))).................)))))))).).	766	804	1	-19.1	1	0.000531785	0.588	1.59536	1.68002	-11.2728	18	38	8	CDS
rno-miR-146a-5p	NM_001000272	Olr1695	TGAGAACTGAATTCCATGGGTT#ACCCATGGGAAGTTCATCTCTCT#.((((..((((((((((((((.#)))))))))..)))))..)))).	798	821	1	-23.1	0	0.000525425	0.544	0.752497	0.400526	-7.23797	18	23	9	CDS
rno-miR-146a-5p	XM_006234991	Slc20a1	TGAGAACTGAATTCCATGGGTT#CCATGGAATTCTGCTCC#.(((....(((((((((((...#)))))))))))..))).	218	235	1	-20.3	0	0.000522095	0.5	0	0	-13.6706	14	17	11	5UTR
rno-miR-146a-5p	XM_039100846	Slc9a3	TGAGAACTGAATTCCATGGGTT#CCATGGTGTTCTACCCGCGGATTCCAGGTTCTCAA#(((((((((((.(((.(((((.#.))))).))))))..)))))))).	1	36	1	-23.1	1	0.000520928	0.477	0	0	-7.51743	19	24	8	5UTR
rno-miR-146a-5p	NM_001134885	Usp40	TGAGAACTGAATTCCATGGGTT#TCCGGAAGAGCTCGGTTCTCT#.(((((((((.(((..((((..#))))...))).))))))))).	332	353	1	-18.2	1	0.000520139	0.544	0.115878	0.246265	-7.5866	16	21	9	CDS
rno-miR-146a-5p	XM_039097315	Sap130	TGAGAACTGAATTCCATGGGTT#GCCCAGGCGGAAATGAGTTCTCAG#((((((((.(.((((.(((((.#)))))...)))).).)))))))).	846	870	1	-23.6	1	0.000519498	0.397	0	0	-8.05179	18	24	8	5UTR
rno-miR-146a-5p	XM_017595428	Cyb5r4	TGAGAACTGAATTCCATGGGTT#GCCCAGGGAAGGCCCCAGTTCTCC#.((((((((..((((.(((((.#))))).)))).....)))))))).	587	611	1	-23.5	1	0.000519402	0.485	0	0	-8.09365	17	24	8	CDS
rno-miR-146a-5p	NM_001000630	Olr691	TGAGAACTGAATTCCATGGGTT#ACCCTGCAGAGAGCCGCAGAAAAGCTCTTTCCACATGCAGTTCTCAT#(((((((((.....((((((..#.)).))))))))))))).	676	723	1	-17.1	1	0.000519378	0.559	0.214145	0.357714	-13.4976	15	18	13	CDS
rno-miR-146a-5p	XM_017601967	Foxo4	TGAGAACTGAATTCCATGGGTT#GGGATTCAGTTCTGGA#(.(((((((((((((.......#))))))))))))).).	75	91	1	-20.9	1	0.000518153	0.397	0	0	-5.3343	14	16	13	5UTR
rno-miR-146a-5p	NM_001134993	Ca13	TGAGAACTGAATTCCATGGGTT#TCCACTGGAATTCAGA#......((((((((((((((..#)))).)))))))))).	419	435	1	-18.6	0	0.000516153	0.515	0.126832	-0.0404011	-15.5666	14	16	10	CDS
rno-miR-146a-5p	NM_023958	Impg1	TGAGAACTGAATTCCATGGGTT#GTGGAGTTCAGCATCTCT#.((((.(((((((((((.....#)))))))))))..)))).	876	894	1	-19.9	0	0.000515682	0.5	2.07759	1.71879	-5.69428	15	18	11	CDS
rno-miR-146a-5p	XM_008766309	Fam219b	TGAGAACTGAATTCCATGGGTT#AGCCTCTTCCTGGAATTTAGTTTTCC#.(((((((((((((((.(((..#.)))))))))))))))))).	1842	1868	1	-22.4	1	0.000515507	0.559	0	0	-3.79332	18	20	18	3UTR
rno-miR-146a-5p	XM_039107441	Cpamd8	TGAGAACTGAATTCCATGGGTT#CCTGTGGAGTTCAGC#......((((((((((((((..#)))))))))))))).	1702	1717	1	-21.4	0	0.00051477	0.5	0	0	-15.5666	14	15	14	CDS
rno-miR-146a-5p	XM_039107442	Cpamd8	TGAGAACTGAATTCCATGGGTT#CCTGTGGAGTTCAGC#......((((((((((((((..#)))))))))))))).	1702	1717	1	-21.4	0	0.00051477	0.5	0	0	-15.5666	14	15	14	CDS
rno-miR-146a-5p	XM_039098365	LOC120098765	TGAGAACTGAATTCCATGGGTT#AACGTGAGGGAGTTGGAACTTCAGTTCTCC#.(((((((((((((((......#.))))).)))))))))).	4944	4974	1	-20.5	1	0.000513816	0.574	0	0	-3.79332	15	18	10	3UTR
rno-miR-146a-5p	XM_006240613	Zfp839	TGAGAACTGAATTCCATGGGTT#CCTGAGGAATGTTAGTTCTCT#.((((((((((((((.((((..#)))).))))).))))))))).	5853	5874	1	-21.4	1	0.000513332	0.544	0	0	-4.02637	18	21	9	3UTR
rno-miR-146a-5p	XM_006238030	Tgfbr1	TGAGAACTGAATTCCATGGGTT#TGGAATTTAGTTCTA#..((((((((((((((......#)))))))))))))).	3885	3900	1	-19.3	1	0.000511128	0.75	0	0	-4.957	14	15	14	3UTR
rno-miR-146a-5p	XM_017595409	Cntn5	TGAGAACTGAATTCCATGGGTT#CAGGGATTCAGGGCTCT#.(((..(((((((((.((....#)))))))))))..))).	812	829	1	-19.9	0	0.000510616	0.529	0	0	-10.0464	14	17	11	CDS
rno-miR-146a-5p	NM_001098724	Necab3	TGAGAACTGAATTCCATGGGTT#ACCCTGGGGTCAGTCCTA#..((.((((.((((((.((((.#)))))))))))))).)).	1513	1531	1	-17.9	0	0.000509134	0.529	0.355293	0.866407	-10.3185	16	18	14	3UTR
rno-miR-146a-5p	XM_006243631	Stag1	TGAGAACTGAATTCCATGGGTT#CCCATGGGAGAGCAGATTCA#...((((((..(((((((((..#)))))))))...))).))).	3671	3691	1	-19.7	0	0.000506517	0.471	0	0	-10.5818	15	20	9	CDS
rno-miR-146a-5p	XM_039082627	Fbxw12	TGAGAACTGAATTCCATGGGTT#CCTGTGGAGGAAGTTCTG#..((((((...(((((((((..#)))))))))..)))))).	392	410	1	-20	1	0.00050126	0.529	0	0	-10.0807	15	18	9	CDS
rno-miR-146a-5p	NM_001107959	Atpaf1	TGAGAACTGAATTCCATGGGTT#ACTAGATGGGTCTTTCTCACCTGCAGACATTCACATGGGATTTAGATTCTCT#.(((((((((((((((((((..#.)).)))))))))))).))))).	2813	2865	1	-22.2	1	0.000499954	0.588	0.0440246	0.0389724	-3.79332	19	23	12	3UTR
rno-miR-146a-5p	XM_039087509	Tmem235	TGAGAACTGAATTCCATGGGTT#GACCCCTGGGTTCAGTTTTG#..(((((((((.((((.(((((#))))).))))))))))))).	4967	4987	1	-22	1	0.000499416	0.412	0	0	-8.3038	18	20	13	3UTR
rno-miR-146a-5p	XM_039087573	Znf750	TGAGAACTGAATTCCATGGGTT#AGCCCAGGAGTCCACCCATCGAGAGGTGCCCACCCTCAGTTCTACAG#(((((((((((((((.((((((#)))))))))))........................)))))))).)).	2290	2337	1	-21.6	1	0.000498631	0.426	0	0	-4.17062	21	47	11	CDS
rno-miR-146a-5p	NM_001106306	Cpxm2	TGAGAACTGAATTCCATGGGTT#GGCCCATGGCAATGAGGTTCTGGG#(.((((((..((((((((((((#))))))))).)))..)))))).).	1284	1308	1	-24.5	1	0.000494362	0.368	0	0	-7.40015	19	24	9	CDS
rno-miR-146a-5p	NM_001164657	Fcgbp	TGAGAACTGAATTCCATGGGTT#GCCCATCCAGGAATGTGGCTGCTACCACAATGGGGTCTACTATGAGCCAGAGGAGTCAGTTCTCAT#(((((((((.(((((.(((.((#.)).)))..)))))))))))))).	3547	3613	1	-24.5	1	0.00049429	0.485	2.50914	0.698218	-5.41313	19	24	14	CDS
rno-miR-146a-5p	XM_006242118	A4galt	TGAGAACTGAATTCCATGGGTT#GGGACTCAGTTCTCAG#((((((((((.((((.......#)))).)))))))))).	369	385	1	-20.8	1	0.000493527	0.5	0	0	-6.9954	14	16	10	5UTR
rno-miR-146a-5p	XM_017595080	A4galt	TGAGAACTGAATTCCATGGGTT#GGGACTCAGTTCTCAG#((((((((((.((((.......#)))).)))))))))).	278	294	1	-20.8	1	0.000493527	0.5	0	0	-6.9954	14	16	10	5UTR
rno-miR-146a-5p	NM_001107183	Ro60	TGAGAACTGAATTCCATGGGTT#GACCCAGGATCTAAGTTTTA#..((((((....(((.((((((#)))))))))....)))))).	3372	3392	1	-17.2	1	0.000490904	0.721	1.9299	1.48449	-13.6605	15	20	9	3UTR
rno-miR-146a-5p	NM_001168630	Cdh9	TGAGAACTGAATTCCATGGGTT#GCTCCATCGCACCAAGCGTGGCTGGATGTGGAATCAGTTCTTC#.((((((((.(((((((.....#.))))))))))))))).	137	180	1	-19.1	1	0.000488609	0.529	0	0	-5.03583	15	17	15	CDS
rno-miR-146a-5p	NM_001107959	Atpaf1	TGAGAACTGAATTCCATGGGTT#GGCCCTGAGTTCAGTTCCCAG#((.(((((((((((...(((((#))))).))))))))))).)).	2411	2432	1	-22.2	0	0.000482707	0.485	0.116659	0.0910592	-6.46361	18	21	11	3UTR
rno-miR-146a-5p	NM_001008863	Usp54	TGAGAACTGAATTCCATGGGTT#ATCCAGCAGTCTTCATGTACTCCATAGGTCATCTTGGAATTCGGGTTCTG#..((((((((((((((.((((.#.)))))))))))))).)))).	4529	4579	1	-18.9	1	0.000480696	0.485	0.77177	0.346794	-4.957	18	21	14	CDS
rno-miR-146a-5p	XM_006238632	Kif2c	TGAGAACTGAATTCCATGGGTT#AACCCTGGGAATTCAGTTCG#...((((((((((((..(((((#)))))..)))))))))))).	665	685	1	-27.7	0	0.000480411	0.515	0	0	-6.74759	17	20	12	CDS
rno-miR-146a-5p	XM_017593141	Kif2c	TGAGAACTGAATTCCATGGGTT#AACCCTGGGAATTCAGTTCG#...((((((((((((..(((((#)))))..)))))))))))).	692	712	1	-27.7	0	0.000480411	0.515	0	0	-6.74759	17	20	12	CDS
rno-miR-146a-5p	NM_031828	Kcnma1	TGAGAACTGAATTCCATGGGTT#CTCAGACTGATTCAGTTTTCAG#(((((((((((((...((((..#))))....))))))))))))).	1323	1345	1	-18.8	1	0.000479037	0.691	2.46884	2.37979	-5.76291	17	22	13	CDS
rno-miR-146a-5p	XM_039084516	Col19a1	TGAGAACTGAATTCCATGGGTT#CCATGGGGTGTTCTTCTCAT#((((((....(((((((((...#)))))))))....)))))).	10522	10542	1	-19.8	0	0.000476429	0.662	0	0	-10.0938	15	20	9	3UTR
rno-miR-146a-5p	XM_017592167	Fam171b	TGAGAACTGAATTCCATGGGTT#AACCCACTGGAATGCGGTTTTTG#.((((((((.((((((((((((#)))))).)))))).)))))))).	4511	4534	1	-23.2	1	0.000476305	0.632	0	0	-5.03583	20	23	8	3UTR
rno-miR-146a-5p	XM_575160	Fam171b	TGAGAACTGAATTCCATGGGTT#AACCCACTGGAATGCGGTTTTTG#.((((((((.((((((((((((#)))))).)))))).)))))))).	4786	4809	1	-23.2	1	0.000476305	0.632	0	0	-5.03583	20	23	8	3UTR
rno-miR-146a-5p	XM_006236631	Chmp3	TGAGAACTGAATTCCATGGGTT#GGCCACACTCAGAAGCTAGGGCCCCCCAGTTGGGGTCTCAGTTCTCT#.(((((((((((((((((((..#.))))..)))))).))))))))).	691	738	1	-25.5	1	0.000475008	0.441	0	0	-3.79332	19	24	9	CDS
rno-miR-146a-5p	NM_001108406	Sptlc1	TGAGAACTGAATTCCATGGGTT#GGCGGGGGACAAATGTCCATGGGACAGTTCTTG#.((((((((..(((((((((..#.))))))))))))))))).	2756	2789	1	-22.3	1	0.000471667	0.441	-0.465138	0.0433863	-7.86061	17	19	17	3UTR
rno-miR-146a-5p	XM_006229746	Lrrc32	TGAGAACTGAATTCCATGGGTT#AGCTTGTGAGGATCAGTTCTCT#.((((((((.((((((((((((#)))))))).)))))))))))).	5925	5947	1	-21.7	1	0.000463127	0.574	0	0	-5.03583	20	22	12	3UTR
rno-miR-146a-5p	NM_001170539	Stt3b	TGAGAACTGAATTCCATGGGTT#CTCATGGGTTCTATGAGTTCTTAA#(((((((((((.((((((((..#)))))))))))....)))))))).	404	428	1	-19.3	1	0.000463084	0.603	2.05325	2.18198	-7.28438	19	24	11	CDS
rno-miR-146a-5p	XM_006228035	Myadm	TGAGAACTGAATTCCATGGGTT#AGCCTGTGTCAGTCAGAGGAAAACTTTTGGGAATCAGTTCTCT#.(((((((((.(((((.(((((#.))))).))))).))))))))).	183	226	1	-23.9	1	0.000462912	0.544	0	0	-6.6181	19	23	9	5UTR
rno-miR-146a-5p	NM_001108658	Topors	TGAGAACTGAATTCCATGGGTT#GATCCAGGAGTTCAGATTCCCGT#((.((((((((((((.((((((#))))))))))))))).))).)).	1960	1983	1	-21.4	0	0.00046151	0.515	0.623505	0.922323	-5.72816	20	23	15	CDS
rno-miR-146a-5p	XM_006233447	Odf2l	TGAGAACTGAATTCCATGGGTT#AGCTTATGGAATTCTGTGCTTTCTCAA#(((((((.((((((((((((((#)))))))))))))).))....))))).	3268	3295	1	-22.8	1	0.000457202	0.662	0	0	-6.25121	21	27	14	5UTR
rno-miR-146a-5p	XM_006233449	Odf2l	TGAGAACTGAATTCCATGGGTT#AGCTTATGGAATTCTGTGCTTTCTCAA#(((((((.((((((((((((((#)))))))))))))).))....))))).	3267	3294	1	-22.8	1	0.000457202	0.662	0	0	-6.25121	21	27	14	5UTR
rno-miR-146a-5p	NM_001107727	Mttp	TGAGAACTGAATTCCATGGGTT#TTCAATGGAATTCAGTCTG#..((.(((((((((((((((..#)))).))))))))))))).	2386	2405	1	-18.3	0	0.000456506	0.544	1.35445	1.46018	-9.07604	17	19	13	CDS
rno-miR-146a-5p	NM_001106129	Zadh2	TGAGAACTGAATTCCATGGGTT#AGCCCGTGGAGACAGTTCTGAA#(.(((((((..(((((((((((#))))))))))).))))))).).	746	768	1	-26.1	1	0.000449226	0.515	0.841687	1.14401	-9.16853	19	22	11	CDS
rno-miR-146a-5p	NM_001012205	Dpp10	TGAGAACTGAATTCCATGGGTT#AGGCCAGATGGTGACAGAAAAATTTCATGTTGACTGGGATTCAGTTCTTAT#((((((((((((((((......#.)))))))))))))))).	1715	1766	1	-23	1	0.000445528	0.647	0	0	-3.93757	16	18	16	CDS
rno-miR-146a-5p	XM_017598874	Dpp10	TGAGAACTGAATTCCATGGGTT#AGGCCAGATGGTGACAGAAAAATTTCATGTTGACTGGGATTCAGTTCTTAT#((((((((((((((((......#.)))))))))))))))).	1888	1939	1	-23	1	0.000445528	0.647	0	0	-3.93757	16	18	16	CDS
rno-miR-146a-5p	XM_039090947	Dpp10	TGAGAACTGAATTCCATGGGTT#AGGCCAGATGGTGACAGAAAAATTTCATGTTGACTGGGATTCAGTTCTTAT#((((((((((((((((......#.)))))))))))))))).	1325	1376	1	-23	1	0.000445528	0.647	0	0	-3.93757	16	18	16	CDS
rno-miR-146a-5p	XM_039096375	RGD1564999	TGAGAACTGAATTCCATGGGTT#GCCCGTGGAGGCCAGA#......(((..((((((((((.#))))))))))..))).	1159	1175	1	-19.8	0	0.000439546	0.471	0	0	-19.6338	13	16	10	5UTR
rno-miR-146a-5p	XM_341552	Tasor2	TGAGAACTGAATTCCATGGGTT#GACCCACGGAGCTTTAGTTTTCAC#(((((((((((((((.((((((#)))))).)))).))))))))))).	155	179	1	-25.1	1	0.000438755	0.426	0	0	-4.17062	21	24	11	5UTR
rno-miR-146a-5p	NM_001191727	Med14	TGAGAACTGAATTCCATGGGTT#ATCCAGTGGAATTCCATTCATCAG#((((((..(((((((((((((.#))))).))))))))..))).))).	2633	2657	1	-18.8	0	0.000437765	0.632	2.24735	1.97815	-7.7949	19	24	8	CDS
rno-miR-146a-5p	XM_039081297	Ctdspl	TGAGAACTGAATTCCATGGGTT#AGCCCCCAGCAGTGGTGACGTGGGTGCCTGGGGAGTTACAGTTTTCT#.((((((((((((((..((((.#.))))..)))))).)))))))).	4518	4565	1	-22.8	1	0.000436136	0.456	0	0	-4.02637	18	23	8	3UTR
rno-miR-146a-5p	XM_039081298	Ctdspl	TGAGAACTGAATTCCATGGGTT#AGCCCCCAGCAGTGGTGACGTGGGTGCCTGGGGAGTTACAGTTTTCT#.((((((((((((((..((((.#.))))..)))))).)))))))).	4487	4534	1	-22.8	1	0.000436136	0.456	0	0	-4.02637	18	23	8	3UTR
rno-miR-146a-5p	NM_001164656	Fcgbpl1	TGAGAACTGAATTCCATGGGTT#GCCCATGGAGAAATGCGGCTGCCATCATAACGGAGTCTACTATGAGCCAGAGGAGTCAGTTCTCAT#(((((((((.(((((.(((.((#.)).)))..)))))))))))))).	3483	3549	1	-24.5	1	0.000434414	0.5	0.716004	0.484422	-5.41313	19	24	14	CDS
rno-miR-146a-5p	NM_017015	Gusb	TGAGAACTGAATTCCATGGGTT#GGCCCGTGGAACAGG#......(((..(((((((((((#)))))))))))))).	842	857	1	-19	0	0.000433535	0.456	0.758045	0.790625	-19.6338	14	15	14	CDS
rno-miR-146a-5p	NM_001106693	Eif4g3	TGAGAACTGAATTCCATGGGTT#CCCGGATTCGGTTCA#...(((((((((((...(((..#)))))))))))))).	3142	3157	1	-17.6	0	0.000428583	0.544	2.12491	2.20614	-7.48304	14	15	14	CDS
rno-miR-146a-5p	XM_008764222	Eif4g3	TGAGAACTGAATTCCATGGGTT#CCCGGATTCGGTTCA#...(((((((((((...(((..#)))))))))))))).	4568	4583	1	-17.6	0	0.000428583	0.544	0	0	-7.48304	14	15	14	CDS
rno-miR-146a-5p	XM_039109671	Eif4g3	TGAGAACTGAATTCCATGGGTT#CCCGGATTCGGTTCA#...(((((((((((...(((..#)))))))))))))).	3451	3466	1	-17.6	0	0.000428583	0.544	0	0	-7.48304	14	15	14	CDS
rno-miR-146a-5p	NM_001100862	Fam13a	TGAGAACTGAATTCCATGGGTT#GTGGATGACAGTTCTCC#.((((((((...(((((.....#)))))...)))))))).	2246	2263	1	-18.2	1	0.000426842	0.485	0.0590167	0.500931	-11.2074	13	17	8	3UTR
rno-miR-146a-5p	NM_001014012	Hars2	TGAGAACTGAATTCCATGGGTT#GGCCCTGAGTTCAGTTCC#...(((((((((((...(((((#))))).))))))))))).	2398	2416	1	-21.1	0	0.000426639	0.515	0.102864	0.127736	-7.48304	16	18	11	3UTR
rno-miR-146a-5p	XM_006254575	Hars2	TGAGAACTGAATTCCATGGGTT#GGCCCTGAGTTCAGTTCC#...(((((((((((...(((((#))))).))))))))))).	2329	2347	1	-21.1	0	0.000426639	0.515	0	0	-7.48304	16	18	11	3UTR
rno-miR-146a-5p	NM_181367	Lhx9	TGAGAACTGAATTCCATGGGTT#GGCCCTGGAATCGGAGCTCAC#((((..(((.((((((.(((((#))))))))))))))..)))).	407	428	1	-21.7	0	0.000425112	0.471	1.78743	2.10324	-11.2001	18	21	14	CDS
rno-miR-146a-5p	XM_006249914	Lhx9	TGAGAACTGAATTCCATGGGTT#GGCCCTGGAATCGGAGCTCAC#((((..(((.((((((.(((((#))))))))))))))..)))).	909	930	1	-21.7	0	0.000425112	0.471	0	0	-11.2001	18	21	14	CDS
rno-miR-146a-5p	XM_006249919	Lhx9	TGAGAACTGAATTCCATGGGTT#GGCCCTGGAATCGGAGCTCAC#((((..(((.((((((.(((((#))))))))))))))..)))).	505	526	1	-21.7	0	0.000425112	0.471	0	0	-11.2001	18	21	14	CDS
rno-miR-146a-5p	XM_039089429	Tmem132b	TGAGAACTGAATTCCATGGGTT#CCCTGGAAGCCAGGACTCAC#((((..(((..(((((.(((..#))))))))..)))..)))).	5688	5708	1	-20.8	0	0.000423602	0.5	0	0	-14.0249	15	20	8	3UTR
rno-miR-146a-5p	NM_024128	Nsg1	TGAGAACTGAATTCCATGGGTT#AGCATCACGCGCTCAGTGTCACCGTGGATGTCAGTTCTG#..((((((((..(((((((...#.)))))))..)))))))).	541	580	1	-25.2	1	0.000422195	0.456	2.01859	2.06926	-11.1286	15	19	8	CDS
rno-miR-146a-5p	XM_229957	RGD1564306	TGAGAACTGAATTCCATGGGTT#GATATCCCCCCATGGGTGAAAGTTCC#...(((((....((((((((..#.))))))))....))))).	215	241	1	-20.1	0	0.000419123	0.529	0	0	-14.985	13	19	8	CDS
rno-miR-146a-5p	XM_006246109	Sh3pxd2b	TGAGAACTGAATTCCATGGGTT#GCCCACGGCTGGTGCTGGGGACCCCTGGGTTCTCAGTTCTTC#.(((((((((..((((.(((((#.))))).))))...))))))))).	7171	7213	1	-23.4	1	0.000417203	0.382	0	0	-9.9649	18	24	9	3UTR
rno-miR-146a-5p	XM_017597616	Sh3pxd2b	TGAGAACTGAATTCCATGGGTT#GCCCACGGCTGGTGCTGGGGACCCCTGGGTTCTCAGTTCTTC#.(((((((((..((((.(((((#.))))).))))...))))))))).	7257	7299	1	-23.4	1	0.000417203	0.382	0	0	-9.9649	18	24	9	3UTR
rno-miR-146a-5p	NM_001106634	Sdr16c5	TGAGAACTGAATTCCATGGGTT#GACTCGGAAGGCTTTTAGCATTGCAGTTCGCCCGCCTGGGATCAGTGCTCGT#((((.((((.(((((((((((.#.)))))..)))))))))).)))).	370	422	1	-21.8	0	0.000415144	0.5	0.935551	0.785844	-9.29912	19	24	10	CDS
rno-miR-146a-5p	XM_006234173	Cacnb4	TGAGAACTGAATTCCATGGGTT#TCCGTGGGATGGGTCTCAA#((((.(((..((((((((((..#)))))))))).))))))).	258	277	1	-20.1	0	0.000413784	0.471	0	0	-10.3555	17	19	10	5UTR
rno-miR-146a-5p	NM_001100518	Hs2st1	TGAGAACTGAATTCCATGGGTT#ACCCGTGGAGGTTAGTG#.....(((((.((((((((((.#)))))))))).))))).	1658	1675	1	-20.8	0	0.000411602	0.456	1.16481	1.08038	-16.4904	15	17	10	3UTR
rno-miR-146a-5p	NM_001099508	Vom2r61	TGAGAACTGAATTCCATGGGTT#AGCCTTCATGGAATTTATCCCAGTTACTCAC#((((((((((((((((((((((#))))..))))))))).....))))).)))).	710	741	1	-20.9	1	0.000411137	0.588	0	0	-3.93757	22	31	9	CDS
rno-miR-146a-5p	XM_008761673	Sptan1	TGAGAACTGAATTCCATGGGTT#CCCATGGAAGTCTGCTCGA#((((....((.(((((((((..#))))))))).))..)))).	3730	3749	1	-19.9	0	0.000405768	0.426	0	0	-16.6397	15	19	9	CDS
rno-miR-146a-5p	XM_039105782	Sptan1	TGAGAACTGAATTCCATGGGTT#CCCATGGAAGTCTGCTCGA#((((....((.(((((((((..#))))))))).))..)))).	3572	3591	1	-19.9	0	0.000405768	0.426	0	0	-16.6397	15	19	9	CDS
rno-miR-146a-5p	XM_039105783	Sptan1	TGAGAACTGAATTCCATGGGTT#CCCATGGAAGTCTGCTCGA#((((....((.(((((((((..#))))))))).))..)))).	3512	3531	1	-19.9	0	0.000405768	0.426	0	0	-16.6397	15	19	9	CDS
rno-miR-146a-5p	XM_039105784	Sptan1	TGAGAACTGAATTCCATGGGTT#CCCATGGAAGTCTGCTCGA#((((....((.(((((((((..#))))))))).))..)))).	3572	3591	1	-19.9	0	0.000405768	0.426	0	0	-16.6397	15	19	9	CDS
rno-miR-146a-5p	NM_001106215	Smoc2	TGAGAACTGAATTCCATGGGTT#CCCGTGGAAGGCAGAGCTA#..((..(((..(((((((((..#)))))))))..)))..)).	2267	2286	1	-21.9	0	0.000401216	0.426	-0.189994	-0.107834	-15.0443	14	19	9	3UTR
rno-miR-146a-5p	XM_006227958	Smoc2	TGAGAACTGAATTCCATGGGTT#CCCGTGGAAGGCAGAGCTA#..((..(((..(((((((((..#)))))))))..)))..)).	2358	2377	1	-21.9	0	0.000401216	0.426	0	0	-15.0443	14	19	9	3UTR
rno-miR-146a-5p	NM_001008382	Cnot8	TGAGAACTGAATTCCATGGGTT#AACCCGTGGAGTCAT#.......((.((((((((((((#)))))))))))))).	1832	1847	1	-18.7	0	0.0003964	0.441	0	0	-18.3528	14	15	14	3UTR
rno-miR-146a-5p	XM_039111272	Phactr4	TGAGAACTGAATTCCATGGGTT#GCTCCTGAAGGAGGGAGGCTCAGTTCTCAC#((((((((((.((((.......#.))))..)))))))))).	4220	4250	1	-19.7	1	0.000395543	0.368	0	0	-6.9954	14	18	10	3UTR
rno-miR-146a-5p	XM_039111273	Phactr4	TGAGAACTGAATTCCATGGGTT#GCTCCTGAAGGAGGGAGGCTCAGTTCTCAC#((((((((((.((((.......#.))))..)))))))))).	4503	4533	1	-19.7	1	0.000395543	0.368	0	0	-6.9954	14	18	10	3UTR
rno-miR-146a-5p	XM_039095269	LOC120097578	TGAGAACTGAATTCCATGGGTT#ACCCTGGACATTCAGTCTTAT#((((.(((((((((((.((((.#)))))))).))))))))))).	997	1018	1	-21.4	0	0.000395054	0.559	0	0	-8.05661	19	21	11	CDS
rno-miR-146a-5p	NM_001166403	RT1-T24-3	TGAGAACTGAATTCCATGGGTT#GGCTCTTAGGCTTGTGGACAGCTTTTGGGAGTCAGTTCTCAC#((((((((((.(((((.(((((#.))))).))))).)))))))))).	1326	1368	1	-24.8	1	0.00039405	0.529	0.17181	0.0327443	-6.76235	20	24	10	3UTR
rno-miR-146a-5p	NM_001108544	Adamts6	TGAGAACTGAATTCCATGGGTT#CTGTGGAGTTTCAGATCTCAC#(((((.(((((((((((((...#)))))))))).))).))))).	633	654	1	-21.7	0	0.000393512	0.574	0	0	-5.83853	18	21	10	CDS
rno-miR-146a-5p	NM_001000880	Olr1126	TGAGAACTGAATTCCATGGGTT#AGCCTTTTCTACCTGTGGGTCTCATCTCTCAG#(((((..(((..(((((((((.#.)))))))))..)))..))))).	707	739	1	-20	0	0.000384314	0.618	-0.136415	0.368928	-13.5538	17	23	9	CDS
rno-miR-146a-5p	XM_006241323	Bbs10	TGAGAACTGAATTCCATGGGTT#AGCCTCTGTTTTCATCGTCTAGCTCGGAATTTGTTCTCGA#(((((((.(((((((..(((((#.))))))))))))))))))).	819	859	1	-18.7	1	0.000383246	0.544	0	0	-6.48426	19	21	19	CDS
rno-miR-146a-5p	XM_008764025	Ago1	TGAGAACTGAATTCCATGGGTT#ATGCGTGGGAAACAGTTCTACAA#(((((((((..(((((((.((.#)).)))))))..))))))).)).	1509	1532	1	-20	1	0.000382855	0.485	0	0	-8.00486	18	23	7	CDS
rno-miR-146a-5p	NM_001127375	Zbtb7c	TGAGAACTGAATTCCATGGGTT#GGCCCATGGGTTCTTGAGTTTGCAT#((.(((((.((.((((((((((#))))))))))...)).))))).)).	3550	3575	1	-20.7	0	0.000381895	0.559	0.275934	-0.195539	-9.89831	19	25	10	3UTR
rno-miR-146a-5p	NM_030858	Smad7	TGAGAACTGAATTCCATGGGTT#AACTCGTGGATACGGTTTTTC#.((((((((...((((((((((#))))))))))..)))))))).	568	589	1	-19.5	1	0.000381819	0.544	0.968006	0.822283	-11.2074	18	21	10	5UTR
rno-miR-146a-5p	XM_008766404	Tln2	TGAGAACTGAATTCCATGGGTT#CCCATGGAAATCGATTCTGCAC#((((((.(((.(((((((((..#))))))))).))).)))).)).	3501	3523	1	-21.1	0	0.000380405	0.485	0	0	-8.30604	18	22	9	CDS
rno-miR-146a-5p	XM_017596080	Tln2	TGAGAACTGAATTCCATGGGTT#CCCATGGAAATCGATTCTGCAC#((((((.(((.(((((((((..#))))))))).))).)))).)).	3502	3524	1	-21.1	0	0.000380405	0.485	0	0	-8.30604	18	22	9	CDS
rno-miR-146a-5p	XM_017596083	Tln2	TGAGAACTGAATTCCATGGGTT#CCCATGGAAATCGATTCTGCAC#((((((.(((.(((((((((..#))))))))).))).)))).)).	3502	3524	1	-21.1	0	0.000380405	0.485	0	0	-8.30604	18	22	9	CDS
rno-miR-146a-5p	NM_031030	Gak	TGAGAACTGAATTCCATGGGTT#AGCTGGTGGAGTTTCTCAG#(((((....((((((((.((((#)))).))))))))))))).	489	508	1	-18.1	0	0.000367812	0.515	2.19497	1.61564	-10.7522	17	19	13	CDS
rno-miR-146a-5p	NM_001169101	Alk	TGAGAACTGAATTCCATGGGTT#ATCCGTGGGGTTCT#........(((((((((((((.#))))))))))))).	2596	2610	1	-17.8	0	0.000366337	0.471	2.45432	1.8544	-19.4239	13	14	13	CDS
rno-miR-146a-5p	NM_001106457	Nhlh2	TGAGAACTGAATTCCATGGGTT#CCCGAGGGGGTGGTAGCTTTAACCCTGGAGGTTTTCAGTTCC#...(((((((((((((.(((((#.))))))))))...)))))))).	2788	2830	1	-21.8	0	0.00036468	0.515	-0.0666158	-0.043146	-6.51454	18	23	10	3UTR
rno-miR-146a-5p	XM_006233047	Nhlh2	TGAGAACTGAATTCCATGGGTT#CCCGAGGGGGTGGTAGCTTTAACCCTGGAGGTTTTCAGTTCC#...(((((((((((((.(((((#.))))))))))...)))))))).	1192	1234	1	-21.8	0	0.00036468	0.515	0	0	-6.51454	18	23	10	3UTR
rno-miR-146a-5p	XM_039095340	Fancc	TGAGAACTGAATTCCATGGGTT#ACCTATGGAAGCTTCAGGTCTCAC#(((((.(((((((((((((((.#))))))))))..))))).))))).	4249	4273	1	-25.4	0	0.000364016	0.485	0	0	-5.83853	20	24	10	3UTR
rno-miR-146a-5p	NM_001287618	Malrd1	TGAGAACTGAATTCCATGGGTT#ACACCATGGAAAACAGTGTTCT#.(((.((((..((((((((((.#)).))))))))..)))).))).	1087	1109	1	-19	0	0.000357281	0.618	0.795088	0.693561	-11.9796	17	22	8	CDS
rno-miR-146a-5p	XM_008773660	Phf6	TGAGAACTGAATTCCATGGGTT#ACCCATGGAGAAATAGAGCTCC#.(((..(((..((((((((((.#))))))))))...)))..))).	3066	3088	1	-20.2	0	0.000355584	0.632	0	0	-13.8806	16	22	10	3UTR
rno-miR-146a-5p	XM_039100499	Phf6	TGAGAACTGAATTCCATGGGTT#ACCCATGGAGAAATAGAGCTCC#.(((..(((..((((((((((.#))))))))))...)))..))).	2965	2987	1	-20.2	0	0.000355584	0.632	0	0	-13.8806	16	22	10	3UTR
rno-miR-146a-5p	NM_001105730	Rps28	TGAGAACTGAATTCCATGGGTT#AGCCCATGGAATG#..........((((((((((((#)))))))))))).	272	285	1	-18.7	0	0.000355444	0.574	1.72016	1.60461	-21.7228	12	13	12	3UTR
rno-miR-146a-5p	XM_344862	Zfp324	TGAGAACTGAATTCCATGGGTT#AACCCTAAACCTTGAGGGCAGATGGGTGCGTGGGATTCAGTTTGCT#.(.(((((((((((((((.(..#.).))))))))))))))).).	3327	3373	1	-21.6	0	0.000355346	0.456	0	0	-5.35086	17	21	15	3UTR
rno-miR-146a-5p	NM_001108555	Lrba	TGAGAACTGAATTCCATGGGTT#GCCCTTGGAGATCTGTCTGTTGACCCACCTGTGCAGTTCAGATCTTT#.((((.(((((((.(((((((.#.))))))).))))))).)))).	4983	5030	1	-19.7	0	0.000353821	0.574	2.06595	1.53066	-6.55112	18	22	7	CDS
rno-miR-146a-5p	XM_039082627	Fbxw12	TGAGAACTGAATTCCATGGGTT#CCCGTGGAAATTGGTTTC#...(((((((.(((((((((..#))))))))).))))))).	552	570	1	-20.4	0	0.000353815	0.603	0	0	-9.33931	16	18	9	CDS
rno-miR-146a-5p	XM_039089863	Sdk1	TGAGAACTGAATTCCATGGGTT#GGCCCTGGAGTGAGCTGGTGCGGGGCCGTACACGGGAGTCAGTTCCTTCAG#((((((((((((((((.(((((#)))))))))))...........................)))))))..))).	4072	4123	1	-19.7	1	0.000347123	0.426	0	0	-3.93757	21	51	11	CDS
rno-miR-146a-5p	NM_001270982	Serpina3m	TGAGAACTGAATTCCATGGGTT#CCCTGGGAGCAAAGGGCAACACCCTGGAAGAGATTCTAGAAGTTCTCAG#((((((((((((((((.((((.#.))))))))....))))....)))))))).	358	407	1	-21.1	1	0.000345847	0.544	0.254202	0.318982	-3.93757	20	30	8	CDS
rno-miR-146a-5p	XM_006231050	Cyb561a3	TGAGAACTGAATTCCATGGGTT#GGCCCAAGCTGCCCTGGAAAGTTCTCC#.(((((((...(((((.((((.#.)))))))))))))))).	960	987	1	-20.7	1	0.000343287	0.382	0	0	-8.917	16	18	16	CDS
rno-miR-146a-5p	XM_039084244	Cyb561a3	TGAGAACTGAATTCCATGGGTT#GGCCCAAGCTGCCCTGGAAAGTTCTCC#.(((((((...(((((.((((.#.)))))))))))))))).	925	952	1	-20.7	1	0.000343287	0.382	0	0	-8.917	16	18	16	CDS
rno-miR-146a-5p	NM_001191642	Nlrp3	TGAGAACTGAATTCCATGGGTT#GACTCAGGAGTTCAAGTTTTG#..(((((((((((((.((((((#)))))))))))))).))))).	3031	3052	1	-20	1	0.000342035	0.574	0.6973	0.747305	-5.19005	19	21	14	CDS
rno-miR-146a-5p	XM_039085396	Nlrp3	TGAGAACTGAATTCCATGGGTT#GACTCAGGAGTTCAAGTTTTG#..(((((((((((((.((((((#)))))))))))))).))))).	3091	3112	1	-20	1	0.000342035	0.574	0	0	-5.19005	19	21	14	CDS
rno-miR-146a-5p	XM_039081030	Gramd1b	TGAGAACTGAATTCCATGGGTT#GAGCCATGGAAGTTCAGTA#.....((((((((((((((.((#)).)))))))).)))))).	8012	8031	1	-20.8	0	0.000338052	0.721	0	0	-13.6656	16	19	8	3UTR
rno-miR-146a-5p	XM_039081037	Gramd1b	TGAGAACTGAATTCCATGGGTT#GAGCCATGGAAGTTCAGTA#.....((((((((((((((.((#)).)))))))).)))))).	7070	7089	1	-20.8	0	0.000338052	0.721	0	0	-13.6656	16	19	8	3UTR
rno-miR-146a-5p	XM_039081038	Gramd1b	TGAGAACTGAATTCCATGGGTT#GAGCCATGGAAGTTCAGTA#.....((((((((((((((.((#)).)))))))).)))))).	9465	9484	1	-20.8	0	0.000338052	0.721	0	0	-13.6656	16	19	8	3UTR
rno-miR-146a-5p	XM_039081040	Gramd1b	TGAGAACTGAATTCCATGGGTT#GAGCCATGGAAGTTCAGTA#.....((((((((((((((.((#)).)))))))).)))))).	6953	6972	1	-20.8	0	0.000338052	0.721	0	0	-13.6656	16	19	8	3UTR
rno-miR-146a-5p	XM_039081042	Gramd1b	TGAGAACTGAATTCCATGGGTT#GAGCCATGGAAGTTCAGTA#.....((((((((((((((.((#)).)))))))).)))))).	12170	12189	1	-20.8	0	0.000338052	0.721	0	0	-13.6656	16	19	8	3UTR
rno-miR-146a-5p	NM_080776	Mmp16	TGAGAACTGAATTCCATGGGTT#GCTTCTGGTTTCCATGGAGACAGTTCC#...((((((..(((((((((..#.))))))))).)))))).	993	1020	1	-20.1	0	0.000337274	0.515	1.93286	1.98868	-10.5818	15	18	9	CDS
rno-miR-146a-5p	NM_001013157	Nnt	TGAGAACTGAATTCCATGGGTT#GACACCGTGAATTCAGCGGCTCAG#((((..(((((((.((((((((#))).))))))))))))...)))).	3170	3194	1	-19	0	0.000335974	0.529	2.09276	2.06087	-10.8144	19	24	12	CDS
rno-miR-146a-5p	NM_001005889	Rdx	TGAGAACTGAATTCCATGGGTT#ACCCATGGGCAGTCTCAA#((((.((((...(((((((((.#))))))))))))))))).	2979	2997	1	-22.6	0	0.000333958	0.559	0.746678	0.678459	-15.4707	17	18	17	3UTR
rno-miR-146a-5p	XM_039092718	Atp10d	TGAGAACTGAATTCCATGGGTT#CCTGTGGAGGACGAGTCTTCTCAG#((((((((...(((((((((..#)))))))))....)))..))))).	2304	2328	1	-19.1	1	0.00033183	0.485	0	0	-9.06125	17	24	9	CDS
rno-miR-146a-5p	XM_039084172	Sdhaf2	TGAGAACTGAATTCCATGGGTT#ACCTATGGGGTTGCAGA#......(((((((((((((((.#)))))))))))).))).	690	707	1	-18.8	0	0.000323096	0.574	0	0	-15.5666	15	17	12	3UTR
rno-miR-146a-5p	XM_006249554	Ep400	TGAGAACTGAATTCCATGGGTT#CCCAGGATGGTTCTCAG#(((((((((...(((.((((..#)))))))))))))))).	2458	2475	1	-19.2	1	0.000323015	0.485	0	0	-11.5847	16	17	16	CDS
rno-miR-146a-5p	XM_039089512	Ep400	TGAGAACTGAATTCCATGGGTT#CCCAGGATGGTTCTCAG#(((((((((...(((.((((..#)))))))))))))))).	2065	2082	1	-19.2	1	0.000323015	0.485	0	0	-11.5847	16	17	16	CDS
rno-miR-146a-5p	XM_006229513	Pnma3	TGAGAACTGAATTCCATGGGTT#GCCCAGGGATGGTTCTCAA#((((((((..(((((.(((((.#)))))))))))))))))).	1845	1864	1	-22.9	1	0.00032139	0.5	0	0	-6.46952	18	19	18	CDS
rno-miR-146a-5p	NM_031641	Sult4a1	TGAGAACTGAATTCCATGGGTT#TGTAGCCTGTGGAGTTCAGTTTTCT#.(((((((((((((((((((((#.))))))))))))))))))))).	1356	1381	1	-31.1	1	0.000319164	0.441	1.82486	1.67512	-3.79332	21	23	21	3UTR
rno-miR-146a-5p	XM_006232329	Elf2	TGAGAACTGAATTCCATGGGTT#GCCCATGGAGGCCAGA#......(((..((((((((((.#))))))))))..))).	4790	4806	1	-20.2	0	0.000317687	0.485	0	0	-19.6338	13	16	10	3UTR
rno-miR-146a-5p	XM_039102597	Elf2	TGAGAACTGAATTCCATGGGTT#GCCCATGGAGGCCAGA#......(((..((((((((((.#))))))))))..))).	5210	5226	1	-20.2	0	0.000317687	0.485	0	0	-19.6338	13	16	10	3UTR
rno-miR-146a-5p	XM_006229745	B3gnt6	TGAGAACTGAATTCCATGGGTT#GCCCTGGAATTCCAAGTGCTG#..((.(((((((((((.((((.#))))))))))))..))).)).	7976	7997	1	-18.6	0	0.000313901	0.544	0	0	-9.07604	17	21	12	3UTR
rno-miR-146a-5p	NM_001130062	Dok7	TGAGAACTGAATTCCATGGGTT#AACCTGGACGTGTGGCGGGCTGGCGAGGAATTCGGTTCTCT#.((((((((((((((.(.((((#.)))).)...)))))))))))))).	1030	1071	1	-24.3	1	0.000311006	0.309	0.743412	0.553716	-4.02637	19	25	14	CDS
rno-miR-146a-5p	XM_006251239	Dok7	TGAGAACTGAATTCCATGGGTT#AACCTGGACGTGTGGCGGGCTGGCGAGGAATTCGGTTCTCT#.((((((((((((((.(.((((#.)))).)...)))))))))))))).	1175	1216	1	-24.3	1	0.000311006	0.309	0	0	-4.02637	19	25	14	CDS
rno-miR-146a-5p	NM_001271133	Piwil4	TGAGAACTGAATTCCATGGGTT#TCCACGGGATTCAGTG#.....((((((((((.((((..#)))).)))))))))).	1470	1486	1	-19.2	0	0.00030996	0.5	1.26181	1.2785	-13.8986	14	16	10	CDS
rno-miR-146a-5p	NM_001107004	Zfp39	TGAGAACTGAATTCCATGGGTT#GACCCTGGGTTTCAGCCTCGA#((((..(((((.((((.(((((#))))))))).))))).)))).	3306	3327	1	-20.9	0	0.000308377	0.603	-0.297661	0.0214576	-13.3044	18	21	9	3UTR
rno-miR-146a-5p	XM_039086260	Glyr1	TGAGAACTGAATTCCATGGGTT#AGCCCATGGGAAGGGGTCTTAA#((((.(((...(((((((((((#)))))))))))...))))))).	2679	2701	1	-21.7	0	0.000305769	0.471	0	0	-13.1803	18	22	11	3UTR
rno-miR-146a-5p	XM_039086261	Glyr1	TGAGAACTGAATTCCATGGGTT#AGCCCATGGGAAGGGGTCTTAA#((((.(((...(((((((((((#)))))))))))...))))))).	2457	2479	1	-21.7	0	0.000305769	0.471	0	0	-13.1803	18	22	11	3UTR
rno-miR-146a-5p	NM_052829	Rims1	TGAGAACTGAATTCCATGGGTT#CCCATCCTCCCCTGGAGTCCAGTTCA#...((((((.((((((.(((..#.))).)))))).)))))).	2563	2589	1	-21.8	0	0.000302508	0.529	2.70993	1.97424	-7.75705	15	19	6	CDS
rno-miR-146a-5p	XM_008766936	Rims1	TGAGAACTGAATTCCATGGGTT#CCCATCCTCCCCTGGAGTCCAGTTCA#...((((((.((((((.(((..#.))).)))))).)))))).	2558	2584	1	-21.8	0	0.000302508	0.529	0	0	-7.75705	15	19	6	CDS
rno-miR-146a-5p	NM_001000815	Olr1213	TGAGAACTGAATTCCATGGGTT#CCCATGTCATAGCTGTTTCTCTTTTCTATGGAGCTTCAGCGTTCAT#((((..((((((((((((((..#.))))))))).)))))..)))).	739	785	1	-18.6	0	0.000302407	0.588	0.0554694	-0.151902	-9.95757	18	23	9	CDS
rno-miR-146a-5p	XM_017594726	Ano4	TGAGAACTGAATTCCATGGGTT#GCCTATGGACTCTTCGATGAATACCTGGAAATGATCCTTCAGTTCG#...((((((((.(((((((((.#)))))))))............................)))))))).	2935	2981	1	-19.6	0	0.000302161	0.588	0	0	-9.86134	17	46	9	CDS
rno-miR-146a-5p	XM_017594729	Ano4	TGAGAACTGAATTCCATGGGTT#GCCTATGGACTCTTCGATGAATACCTGGAAATGATCCTTCAGTTCG#...((((((((.(((((((((.#)))))))))............................)))))))).	3629	3675	1	-19.6	0	0.000302161	0.588	0	0	-9.86134	17	46	9	CDS
rno-miR-146a-5p	XM_039078688	Ano4	TGAGAACTGAATTCCATGGGTT#GCCTATGGACTCTTCGATGAATACCTGGAAATGATCCTTCAGTTCG#...((((((((.(((((((((.#)))))))))............................)))))))).	2895	2941	1	-19.6	0	0.000302161	0.588	0	0	-9.86134	17	46	9	CDS
rno-miR-146a-5p	NM_001017445	Faf2	TGAGAACTGAATTCCATGGGTT#GACTCCATGGAGCAGTGTCG#.((..((((..(((((((((((#))).)))))))))))).)).	90	110	1	-17.7	0	0.000300838	0.485	1.25385	0.935075	-15.0117	17	20	12	5UTR
rno-miR-146a-5p	NM_172039	Hdlbp	TGAGAACTGAATTCCATGGGTT#CCTGTGGAAGGTTCTGGT#(.((((((...(((((((((..#))))))))))))))).).	2246	2264	1	-18	1	0.000300833	0.485	1.50757	1.78924	-10.2249	16	18	15	CDS
rno-miR-146a-5p	NM_001015017	Olfm2	TGAGAACTGAATTCCATGGGTT#AGCCGATGGGTCAGTCTCAG#((((.(((((..(((((.((((#)))).)))))))))))))).	553	573	1	-21.7	0	0.000300242	0.456	2.83668	1.90494	-14.2282	18	20	14	CDS
rno-miR-146a-5p	XM_008772564	LOC103694328	TGAGAACTGAATTCCATGGGTT#GGCCTGTGGGGTTGAGTCTTG#.(((.(((.(((((((((((((#))))))))))))).)))))).	4384	4405	1	-21.9	0	0.000295888	0.515	0	0	-8.96875	19	21	13	3UTR
rno-miR-146a-5p	XM_039092533	Apbb2	TGAGAACTGAATTCCATGGGTT#GGCCCTGAGTTCGGTCCTCAG#((((.(((((((((...(((((#))))).))))))))).)))).	9370	9391	1	-21.8	0	0.000295886	0.4	0	0	-9.02511	18	21	9	3UTR
rno-miR-146a-5p	NM_053755	Slc26a3	TGAGAACTGAATTCCATGGGTT#TCCTGGAGTCAGTCTTCTCAC#(((((((((.((((((.(((..#)))))))))))))..))))).	900	921	1	-19.1	1	0.000295258	0.574	0.84233	0.949172	-5.18008	18	21	13	CDS
rno-miR-146a-5p	NM_001009704	Sipa1l2	TGAGAACTGAATTCCATGGGTT#CCATGGAGGGAAGTTCA#...(((((...((((((((...#))))))))...))))).	401	418	1	-19.8	0	0.000294399	0.529	0.163697	0.695016	-11.6382	13	17	8	5UTR
rno-miR-146a-5p	NM_001107972	Hivep3	TGAGAACTGAATTCCATGGGTT#GACCCATGGAAACAGGTGTCTCT#.(((((((...(((((((((((#)))))))))))...))).)))).	240	263	1	-24.5	1	0.000293566	0.456	0.465792	0.482917	-8.917	18	23	11	5UTR
rno-miR-146a-5p	XM_039090285	Hnrnpu	TGAGAACTGAATTCCATGGGTT#AGCCATACAGTATAGATTCTCGAGCGCATGGAGTGTTCTCAA#(((((((...((((((((.(((#.))).))))))))))))))).	4854	4896	1	-22.8	1	0.000293562	0.559	0	0	-8.55011	18	21	15	3UTR
rno-miR-146a-5p	NM_012502	Ar	TGAGAACTGAATTCCATGGGTT#TCCATGGGGTTGGGTG#.....(((.(((((((((((..#))))))))))).))).	1718	1734	1	-19.3	0	0.000293034	0.471	1.36465	1.23742	-14.722	14	16	11	CDS
rno-miR-146a-5p	NM_001107520	Herc2	TGAGAACTGAATTCCATGGGTT#ACGCTGTGGAAGTCAGTTTTCT#.(((((((((.((((((((((.#)).)))))))).))))))))).	1991	2013	1	-22.4	1	0.000291933	0.632	2.08793	2.10595	-6.6181	19	22	9	CDS
rno-miR-146a-5p	XM_006229304	Herc2	TGAGAACTGAATTCCATGGGTT#ACGCTGTGGAAGTCAGTTTTCT#.(((((((((.((((((((((.#)).)))))))).))))))))).	2167	2189	1	-22.4	1	0.000291933	0.632	0	0	-6.6181	19	22	9	CDS
rno-miR-146a-5p	XM_039112608	Herc2	TGAGAACTGAATTCCATGGGTT#ACGCTGTGGAAGTCAGTTTTCT#.(((((((((.((((((((((.#)).)))))))).))))))))).	2067	2089	1	-22.4	1	0.000291933	0.632	0	0	-6.6181	19	22	9	CDS
rno-miR-146a-5p	NM_022925	Ptprq	TGAGAACTGAATTCCATGGGTT#AACCCAGGAGTCTGTTCCAG#((.((((.(.(((((.((((((#)))))))))))).)))))).	4186	4206	1	-18.8	0	0.000290619	0.515	0.640986	1.03371	-9.2843	18	20	12	CDS
rno-miR-146a-5p	NM_053487	Pex11a	TGAGAACTGAATTCCATGGGTT#GCCTATGAATGTAGGAATGTCAGTTTTCT#.((((((((((((((((((((.#)))))).......))))).))))))))).	1806	1835	1	-20.4	1	0.000289444	0.647	0.778485	1.22191	-3.79332	20	29	9	3UTR
rno-miR-146a-5p	NM_012567	Gja1	TGAGAACTGAATTCCATGGGTT#ATTTTCGTTCCCGTGGAGTTGGTACTCAA#((((.(((.(((((((((((..#.)))))))))))))).)))).	1419	1448	1	-23.9	0	0.000289172	0.559	0.83274	0.570701	-9.113	18	21	14	3UTR
rno-miR-146a-5p	NM_001024236	Gtf2h3	TGAGAACTGAATTCCATGGGTT#AGCCCACCTCAGAACTGCAGTGGGCCCCTGGGATTTTGTTTTCAC#(((((((.((((((((.(((((#.))))).)))))))).))))))).	1224	1269	1	-24.1	1	0.000288742	0.5	2.05392	2.25164	-6.25121	20	24	8	3UTR
rno-miR-146a-5p	NM_001100640	Lamc2	TGAGAACTGAATTCCATGGGTT#CTCATGGAGTTGAGTGTCTA#..((((((.(((((((((((..#))))))))))).))).))).	4743	4763	1	-21.2	1	0.000285309	0.618	0.942169	0.974336	-6.01339	17	20	11	3UTR
rno-miR-146a-5p	XM_006239771	Pcare	TGAGAACTGAATTCCATGGGTT#GTGGCATTCAGTTCTTT#.(((((((((((.((((.....#)))).))))))))))).	352	369	1	-19.2	1	0.000284262	0.515	0	0	-5.08246	15	17	11	CDS
rno-miR-146a-5p	XM_039111087	Dennd4c	TGAGAACTGAATTCCATGGGTT#CCCGTGGAGAGAAAAGTGGTCTCT#.(((((((...(((((((((..#))))))))).....)))..)))).	1275	1299	1	-19	1	0.000283873	0.485	0	0	-8.917	16	24	9	CDS
rno-miR-146a-5p	NM_019143	Fn1	TGAGAACTGAATTCCATGGGTT#ACCCTTAAGCCTTCTGCTCTGGAGTCAAGTTCTCAG#((((((((..((((((.((((.#.))))))))))..)))))))).	7740	7776	1	-23.3	1	0.000281849	0.515	2.41716	1.78678	-6.23647	18	22	10	3UTR
rno-miR-146a-5p	XM_006245151	Fn1	TGAGAACTGAATTCCATGGGTT#ACCCTTAAGCCTTCTGCTCTGGAGTCAAGTTCTCAG#((((((((..((((((.((((.#.))))))))))..)))))))).	7488	7524	1	-23.3	1	0.000281849	0.515	0	0	-6.23647	18	22	10	3UTR
rno-miR-146a-5p	XM_006245152	Fn1	TGAGAACTGAATTCCATGGGTT#ACCCTTAAGCCTTCTGCTCTGGAGTCAAGTTCTCAG#((((((((..((((((.((((.#.))))))))))..)))))))).	7484	7520	1	-23.3	1	0.000281849	0.515	0	0	-6.23647	18	22	10	3UTR
rno-miR-146a-5p	NM_133623	Slc6a13	TGAGAACTGAATTCCATGGGTT#AGCCCAGGGAATTCAGTTTTA#..(((((((((((((.((((((#)))))).))))))))))))).	898	919	1	-26.8	1	0.000281763	0.471	1.53494	1.63614	-5.19005	19	21	13	CDS
rno-miR-146a-5p	XM_006237222	Slc6a13	TGAGAACTGAATTCCATGGGTT#AGCCCAGGGAATTCAGTTTTA#..(((((((((((((.((((((#)))))).))))))))))))).	757	778	1	-26.8	1	0.000281763	0.471	0	0	-5.19005	19	21	13	CDS
rno-miR-146a-5p	NM_198761	Adamts5	TGAGAACTGAATTCCATGGGTT#AAGCCATGGAAATTGGGGGTCCTGGGGCCCCTGGGGTCAGTGTTCTCG#.((((((((.((((((.(((((#.))))).))))))))))..)))).	2082	2130	1	-22.6	1	0.000279178	0.382	-0.0180315	0.378664	-5.03583	19	24	10	CDS
rno-miR-146a-5p	XM_017592821	Aak1	TGAGAACTGAATTCCATGGGTT#GACTCATCAGTCATTCCTATGGAACCAGCAGTTCTCAG#(((((((((..(((((((((..#.)))))))))....))))))))).	4368	4406	1	-26.3	1	0.00027875	0.5	0	0	-8.00486	18	24	9	3UTR
rno-miR-146a-5p	XM_017592822	Aak1	TGAGAACTGAATTCCATGGGTT#GACTCATCAGTCATTCCTATGGAACCAGCAGTTCTCAG#(((((((((..(((((((((..#.)))))))))....))))))))).	4272	4310	1	-26.3	1	0.00027875	0.5	0	0	-8.00486	18	24	9	3UTR
rno-miR-146a-5p	NM_001013997	Bora	TGAGAACTGAATTCCATGGGTT#CCCGGGAACCTCAGTTCTTC#.(((((((((.((((.((((..#))))))))..))))))))).	813	833	1	-21.2	1	0.000278201	0.5	1.4519	1.55829	-6.85115	17	20	9	CDS
rno-miR-146a-5p	NM_001099509	Vom2r62	TGAGAACTGAATTCCATGGGTT#AGCCTTCATGGAATTTATCCCAGTTACTCAC#((((((((((((((((((((((#))))..))))))))).....))))).)))).	710	741	1	-20.9	1	0.000277775	0.588	0.524219	0.322721	-3.93757	22	31	9	CDS
rno-miR-146a-5p	NM_001106962	Asb11	TGAGAACTGAATTCCATGGGTT#GCCCTGGATTCAGTCCTCC#.(((.((((((.((((.((((.#)))))))))))))).))).	1252	1271	1	-21.8	0	0.000275256	0.691	0.300074	1.02971	-11.2592	17	19	14	3UTR
rno-miR-146a-5p	XM_006239179	Necap2	TGAGAACTGAATTCCATGGGTT#ACTCATCCCTCCCTCTGGAGAGCAGTTTTCT#.((((((((..(((((.(((..#.)))..)))))..)))))))).	657	688	1	-20.8	1	0.000273158	0.456	0	0	-7.86061	16	22	8	CDS
rno-miR-146a-5p	NM_001039915	Teddm1	TGAGAACTGAATTCCATGGGTT#AGCCCAGAATTCTGTACTCAG#((((.((.((((((..((((((#)))))))))))).)).)))).	1188	1209	1	-19.1	0	0.000273129	0.515	0.63087	-0.014271	-11.3387	18	21	12	3UTR
rno-miR-146a-5p	XM_006246109	Sh3pxd2b	TGAGAACTGAATTCCATGGGTT#CCCATGGAGTTGATTTCCACGGCACAGTTCC#...(((((((((((((((((..#))))))))))).............)))))).	5990	6021	1	-22	0	0.000271571	0.5	0	0	-6.51454	17	31	11	3UTR
rno-miR-146a-5p	XM_017597616	Sh3pxd2b	TGAGAACTGAATTCCATGGGTT#CCCATGGAGTTGATTTCCACGGCACAGTTCC#...(((((((((((((((((..#))))))))))).............)))))).	6076	6107	1	-22	0	0.000271571	0.5	0	0	-6.51454	17	31	11	3UTR
rno-miR-146a-5p	NM_001191653	Tanc2	TGAGAACTGAATTCCATGGGTT#GACCCATGGAGCAGATGTCAA#(((.(.(((..(((((((((((#)))))))))))))).).))).	3539	3560	1	-22.3	0	0.000268822	0.485	2.44927	2.09952	-12.9378	18	21	14	CDS
rno-miR-146a-5p	NM_001105778	Rnf145	TGAGAACTGAATTCCATGGGTT#CTGTGGGATGTGGTTTTCC#.(((((((..(((((((((...#)))))))))..))))))).	3168	3187	1	-18.3	1	0.000268463	0.618	1.48383	1.62132	-6.09222	16	19	9	3UTR
rno-miR-146a-5p	XM_039082535	LOC103690438	TGAGAACTGAATTCCATGGGTT#GACCCATGGAATATGCAGAGCTCAC#((((..(((.((((((((((((#))))))))))))...)))..)))).	7868	7893	1	-26.2	0	0.000268169	0.529	0	0	-11.2001	19	25	12	3UTR
rno-miR-146a-5p	XM_006253787	Snrnp48	TGAGAACTGAATTCCATGGGTT#GCCCATGGAAGGGTCTCAA#((((.(((...((((((((((.#)))))))))).))))))).	1827	1846	1	-22.6	0	0.000267692	0.471	0	0	-13.1803	17	19	10	3UTR
rno-miR-146a-5p	NM_207604	Tlr6	TGAGAACTGAATTCCATGGGTT#GACCTGTGGAGTATCTCAA#(((((.....((((((((((((#)))))))))))).))))).	1101	1120	1	-18.7	0	0.000267477	0.618	0.568504	0.475966	-11.9948	17	19	12	CDS
rno-miR-146a-5p	XM_039080311	Efcab6	TGAGAACTGAATTCCATGGGTT#AGGCTATGGAATTTGGAGATGTTCTCAA#(((((((((((((((((((.((#)).)))))))))))).....))))))).	3470	3498	1	-21.2	1	0.000267419	0.529	0	0	-3.93757	21	28	12	CDS
rno-miR-146a-5p	NM_001012051	Zfp367	TGAGAACTGAATTCCATGGGTT#AGCTAGGTTTTGCAAGTTTAATGCATTCATTGGAAGCAGTTCTCAC#(((((((((..((((((((((.#.)))))).)))).))))))))).	1467	1513	1	-21.9	1	0.000262633	0.647	0.790137	1.06835	-8.00486	19	23	9	3UTR
rno-miR-146a-5p	NM_001044238	Gdpd1	TGAGAACTGAATTCCATGGGTT#GCCCATTCGAGAGCAGTTCTTT#.((((((((..(((.((((((.#))))))..)))..)))))))).	721	743	1	-19.5	1	0.000261565	0.485	1.73995	1.86939	-8.59606	17	22	8	CDS
rno-miR-146a-5p	NM_199494	Fpgt	TGAGAACTGAATTCCATGGGTT#AACCCTGGAAGATATAAAGGCACTTCAGTTCTTT#.(((((((((((((((.(((((#)))))))))).............)))))))))).	1443	1477	1	-22.3	1	0.000260805	0.632	1.47515	1.49824	-3.79332	20	34	10	CDS
rno-miR-146a-5p	XM_006235705	Rab22a	TGAGAACTGAATTCCATGGGTT#GATGGGTGGATGTCCCTGGGACAGTTCTCAC#(((((((((..(((((.(((..#.))))))))))))))))).	1458	1489	1	-22.7	1	0.000257418	0.485	0	0	-8.00486	17	19	17	3UTR
rno-miR-146a-5p	NM_024385	Hhex	TGAGAACTGAATTCCATGGGTT#GCCCAGTGAACAGAATAAAGGTGCCTCTTTGGACAGTTCTCAG#(((((((((...((((.((((.#.))))...))))))))))))).	676	719	1	-20.8	1	0.000257255	0.485	0.714817	0.884018	-11.3517	17	22	13	CDS
rno-miR-146a-5p	NM_153301	Alox15b	TGAGAACTGAATTCCATGGGTT#CCATGGAATTCTTTCTGGA#(.((((..(((((((((((...#))))))))))).)))).).	903	922	1	-21	0	0.000254834	0.515	0.441133	1.13068	-8.95857	16	19	11	CDS
rno-miR-146a-5p	NM_178092	Slc4a10	TGAGAACTGAATTCCATGGGTT#GGAATTCAGTTGTTT#.((.(((((((((((.......#))))))))))).)).	2908	2923	1	-17.9	0	0.000253284	0.544	2.3946	2.22208	-7.0584	13	15	11	CDS
rno-miR-146a-5p	XM_006234279	Slc4a10	TGAGAACTGAATTCCATGGGTT#GGAATTCAGTTGTTT#.((.(((((((((((.......#))))))))))).)).	3097	3112	1	-17.9	0	0.000253284	0.544	0	0	-7.0584	13	15	11	CDS
rno-miR-146a-5p	XM_006234280	Slc4a10	TGAGAACTGAATTCCATGGGTT#GGAATTCAGTTGTTT#.((.(((((((((((.......#))))))))))).)).	3011	3026	1	-17.9	0	0.000253284	0.544	0	0	-7.0584	13	15	11	CDS
rno-miR-146a-5p	XM_039104483	Slc4a10	TGAGAACTGAATTCCATGGGTT#GGAATTCAGTTGTTT#.((.(((((((((((.......#))))))))))).)).	2929	2944	1	-17.9	0	0.000253284	0.544	0	0	-7.0584	13	15	11	CDS
rno-miR-146a-5p	NM_001107800	Stk4	TGAGAACTGAATTCCATGGGTT#GCCCGTGGAGTCGGACCTGCAG#((((..(((.(((((((((((.#))))))))))))))..)).)).	235	257	1	-21.2	0	0.000252165	0.471	2.05657	2.04334	-11.2001	18	22	14	CDS
rno-miR-146a-5p	NM_024488	Cdk5rap3	TGAGAACTGAATTCCATGGGTT#AGCTCATGGAGCTTGAGATCTTC#.((((.((.(((((((((((((#))))))))))).)).)).)))).	1157	1180	1	-19.6	0	0.00024936	0.559	0.554597	1.2083	-6.75067	19	23	11	CDS
rno-miR-146a-5p	NM_001172084	Idua	TGAGAACTGAATTCCATGGGTT#GACCTCCTCATGGAAAACCAGCTTCTCC#.((((((((..(((((((((..#.)))))))))...))).))))).	431	459	1	-20.3	1	0.000249316	0.485	0.17015	-0.210575	-7.86061	17	23	9	CDS
rno-miR-146a-5p	XM_342892	Szt2	TGAGAACTGAATTCCATGGGTT#GACCTACCATGGGCAGCAGTTCTTAG#(((((((((...(((((((...#.)))))))...))))))))).	8366	8392	1	-23.4	1	0.000249086	0.515	0	0	-11.3517	16	21	9	CDS
rno-miR-146a-5p	NM_021741	Cep78	TGAGAACTGAATTCCATGGGTT#AATGCAGGACATCGGTTTTCAG#((((((((((..(((.((.(((#))).)))))..)))))))))).	1793	1815	1	-18.3	1	0.00024716	0.574	0.793215	1.53546	-10.3422	18	22	10	CDS
rno-miR-146a-5p	NM_001000446	Olr1234	TGAGAACTGAATTCCATGGGTT#CTTATGGGGTTAACAGTTCA#...(((((((((((((((((..#)))))))))))..)))))).	48	68	1	-18.8	0	0.000245967	0.529	0.650011	0.413342	-6.51454	17	20	11	CDS
rno-miR-146a-5p	NM_001003673	Pmpca	TGAGAACTGAATTCCATGGGTT#GGCGCTGTGCGCGCGGCCCAAGTTCGGTTCTCC#.((((((((((((...((((((#.)))))))))))))))))).	53	86	1	-22.8	1	0.000245808	0.338	0.189793	0.467052	-5.61866	18	20	18	CDS
rno-miR-146a-5p	XM_002729287	Cped1	TGAGAACTGAATTCCATGGGTT#ATCCACTGTTCCTGGGATTCAGTCTCT#.(((.(((((((((((.(((..#.))))))))))))))))).	2343	2370	1	-22.4	0	0.000244695	0.529	0	0	-7.91236	17	19	17	CDS
rno-miR-146a-5p	NM_022855	Csnk1g3	TGAGAACTGAATTCCATGGGTT#GGCCCTGGGTTCAGTCCTCAG#((((.((((((.((((.(((((#))))))))))))))).)))).	77	98	1	-23.2	0	0.000243435	0.338	1.45317	0.578567	-11.4034	19	21	15	5UTR
rno-miR-146a-5p	NM_001013916	Cd302	TGAGAACTGAATTCCATGGGTT#GACTGTCCTTCGTCCATCTGGGTTCAGTTCCAA#((.(((((((((((.(((((..#.)))))..))))))))))))).	296	329	1	-19.3	0	0.000242977	0.529	0.605114	0.49519	-6.23056	18	22	13	CDS
rno-miR-146a-5p	NM_001107350	Ripk1	TGAGAACTGAATTCCATGGGTT#GACCTGTGGAGGAGTCCTGGTTTTCT#.(((((((((.(((((((((((#)))))))))))...))..))))))).	1406	1432	1	-19.9	1	0.000242476	0.441	-0.231445	0.0366827	-6.6181	20	26	11	CDS
rno-miR-146a-5p	NM_001134601	Cfap97d1	TGAGAACTGAATTCCATGGGTT#AGCCTGCCGTGGATACCAGTCCTCC#.(((.((((...(((((((...#.)))))))...)))).))).	179	204	1	-19.6	0	0.000242199	0.574	0.540617	0.661652	-15.3264	14	20	7	CDS
rno-miR-146a-5p	XM_039106148	Ppp1r26	TGAGAACTGAATTCCATGGGTT#CCATGGAAGTGAGTTTTCT#.(((((((.(.((((((((...#)))))))).).))))))).	5278	5297	1	-21.9	1	0.000241771	0.632	0	0	-7.67449	16	19	8	3UTR
rno-miR-146a-5p	XM_039106149	Ppp1r26	TGAGAACTGAATTCCATGGGTT#CCATGGAAGTGAGTTTTCT#.(((((((.(.((((((((...#)))))))).).))))))).	5434	5453	1	-21.9	1	0.000241771	0.632	0	0	-7.67449	16	19	8	3UTR
rno-miR-146a-5p	XM_017598104	Epha6	TGAGAACTGAATTCCATGGGTT#GAAACTTACTTTCCCATGAGTTTAGTTTTCAT#(((((((((((((.((((((..#.))))))))))))))))))).	10369	10401	1	-24	1	0.000240751	0.691	0	0	-4.79441	19	21	19	3UTR
rno-miR-146a-5p	XM_039088721	Epha6	TGAGAACTGAATTCCATGGGTT#GAAACTTACTTTCCCATGAGTTTAGTTTTCAT#(((((((((((((.((((((..#.))))))))))))))))))).	10916	10948	1	-24	1	0.000240751	0.691	0	0	-4.79441	19	21	19	3UTR
rno-miR-146a-5p	NM_001109446	Uqcc1	TGAGAACTGAATTCCATGGGTT#AAGCCATGGGGTTCAC#.......((((((((((((.((#)).)))))))))))).	297	313	1	-18.6	0	0.000240739	0.544	0.466062	0.421965	-17.1102	14	16	12	CDS
rno-miR-146a-5p	XM_039091847	Septin11	TGAGAACTGAATTCCATGGGTT#GCCCATGGACTGTGGTC#.....((((...(((((((((.#)))))))))...)))).	4050	4067	1	-17.2	0	0.000240002	0.441	0	0	-21.0797	13	17	9	3UTR
rno-miR-146a-5p	NM_022207	Unc5b	TGAGAACTGAATTCCATGGGTT#GGCCCACGGGTTTCAGTTCTG#..(((((((((.(((.((((((#)))))).))).))))))))).	3469	3490	1	-25.3	1	0.000239683	0.426	0	0	-8.53685	18	21	9	3UTR
rno-miR-146a-5p	XM_006256423	Unc5b	TGAGAACTGAATTCCATGGGTT#GGCCCACGGGTTTCAGTTCTG#..(((((((((.(((.((((((#)))))).))).))))))))).	3551	3572	1	-25.3	1	0.000239683	0.426	0	0	-8.53685	18	21	9	3UTR
rno-miR-146a-5p	XM_039094978	Ankrd28	TGAGAACTGAATTCCATGGGTT#ATGGACAGACACCTCTTATGCTGTCGGTTCTCAA#((((((((((....((((((..#.))))))...)))))))))).	2292	2326	1	-19.1	1	0.000239588	0.485	0	0	-12.2551	16	21	10	CDS
rno-miR-146a-5p	XM_039094979	Ankrd28	TGAGAACTGAATTCCATGGGTT#ATGGACAGACACCTCTTATGCTGTCGGTTCTCAA#((((((((((....((((((..#.))))))...)))))))))).	2419	2453	1	-19.1	1	0.000239588	0.485	0	0	-12.2551	16	21	10	CDS
rno-miR-146a-5p	XM_039094980	Ankrd28	TGAGAACTGAATTCCATGGGTT#ATGGACAGACACCTCTTATGCTGTCGGTTCTCAA#((((((((((....((((((..#.))))))...)))))))))).	3374	3408	1	-19.1	1	0.000239588	0.485	0	0	-12.2551	16	21	10	CDS
rno-miR-146a-5p	XM_006256367	Rtkn2	TGAGAACTGAATTCCATGGGTT#GCCCATGGAGGCCAGA#......(((..((((((((((.#))))))))))..))).	5271	5287	1	-20.2	0	0.000235858	0.456	0	0	-19.6338	13	16	10	3UTR
rno-miR-146a-5p	NM_053427	Slc17a6	TGAGAACTGAATTCCATGGGTT#CCCATGGAGGAAGTTTTTC#.(((((((...(((((((((..#)))))))))..))))))).	1364	1383	1	-21.3	1	0.000234967	0.559	2.27739	2.26798	-8.917	16	19	9	CDS
rno-miR-146a-5p	XM_017600324	LOC108353077	TGAGAACTGAATTCCATGGGTT#CCCGTGGTAACAATTCAGTTCA#...(((((((((((((((((..#)))))))....)))))))))).	4862	4884	1	-23.7	0	0.000234702	0.603	0	0	-6.51454	17	22	10	3UTR
rno-miR-146a-5p	NM_207614	Rtcb	TGAGAACTGAATTCCATGGGTT#CCCACGGGGTTCTGTGACTCT#.(((.((.(((((((.((((..#)))).))))))).))..))).	1718	1739	1	-19.6	0	0.000232767	0.441	0.0240168	0.0513631	-10.459	16	21	7	3UTR
rno-miR-146a-5p	XM_243980	Osbpl10	TGAGAACTGAATTCCATGGGTT#GGCCCATGGAGTCCAGGAACCTCT#.(((..(((.((((((((((((#)))))))))))).)))....))).	2231	2255	1	-24.5	0	0.000232709	0.397	0	0	-11.0558	18	24	12	CDS
rno-miR-146a-5p	XM_006254183	Akr1c2	TGAGAACTGAATTCCATGGGTT#GCCTATGGAGTTCTGGG#......(((((((((((((((.#))))))))))))).)).	897	914	1	-19.9	0	0.000231389	0.544	0	0	-15.5666	15	17	13	CDS
rno-miR-146a-5p	NM_001108149	Peak1	TGAGAACTGAATTCCATGGGTT#GACCTTCAGAAATCCATGGAAAGCAGTCTCT#.(((.((((..(((((((((((#.)))))))))))..))))))).	3942	3973	1	-24.7	0	0.000231069	0.529	0.64949	0.974136	-11.9796	18	22	11	CDS
rno-miR-146a-5p	NM_001191591	Gprc5c	TGAGAACTGAATTCCATGGGTT#TCCATGGAGCTCAGA#......((((.(((((((((..#))))))))).)))).	1767	1782	1	-18.2	0	0.000230866	0.441	0.382354	0.457181	-18.3913	13	15	9	3UTR
rno-miR-146a-5p	XM_006247679	Gprc5c	TGAGAACTGAATTCCATGGGTT#TCCATGGAGCTCAGA#......((((.(((((((((..#))))))))).)))).	2491	2506	1	-18.2	0	0.000230866	0.441	0	0	-18.3913	13	15	9	3UTR
rno-miR-146a-5p	XM_008772222	Zfp407	TGAGAACTGAATTCCATGGGTT#CCCGTGGAATTCCGG#......(.((((((((((((..#)))))))))))).).	5512	5527	1	-20.1	0	0.000227296	0.485	0	0	-17.8802	13	15	12	CDS
rno-miR-146a-5p	XM_003750369	Zfp7	TGAGAACTGAATTCCATGGGTT#GACCCGGTGTTGAGACCTGAGCTCGTGGAGGCCATTCTCAT#((((((.((..(((((((((((#.)))))))))))..)))))))).	2814	2855	1	-21.8	0	0.000224042	0.485	0	0	-9.54854	19	23	11	3UTR
rno-miR-146a-5p	XM_006236674	Tcf7l1	TGAGAACTGAATTCCATGGGTT#GGCAAGAAGGACTTCCCAGGGTAGCCATGGAGTTCAGTG#.....((((((((((((((.(.#.).)))))))))))))).	246	285	1	-23.9	0	0.000222638	0.471	0	0	-13.6656	15	18	14	5UTR
rno-miR-146a-5p	XM_039107582	Tcf7l1	TGAGAACTGAATTCCATGGGTT#GGCAAGAAGGACTTCCCAGGGTAGCCATGGAGTTCAGTG#.....((((((((((((((.(.#.).)))))))))))))).	246	285	1	-23.9	0	0.000222638	0.471	0	0	-13.6656	15	18	14	5UTR
rno-miR-146a-5p	XM_006253152	Stox2	TGAGAACTGAATTCCATGGGTT#CCCATGGAGTTTTCCTTAG#((((....((((((((((((..#))))))))))))..)))).	7756	7775	1	-19.7	0	0.000222569	0.706	0	0	-13.8149	16	19	12	3UTR
rno-miR-146a-5p	XM_006237052	Fancd2os	TGAGAACTGAATTCCATGGGTT#AGCTACACTGGAGCGTGCAATCCGCGTGGAGTTCAGTAGGACTGTCAA#(((.((((((((((((((((..#.)).))))))))))))).....).))).	174	222	1	-22.2	0	0.000221557	0.412	0	0	-6.9696	19	28	13	CDS
rno-miR-146a-5p	XM_006255482	Slc12a4	TGAGAACTGAATTCCATGGGTT#CCCATGGGACAGGTTCTG#..((((((...(((((((((..#)))))))))..)))))).	549	567	1	-22	1	0.000221152	0.515	0	0	-10.0807	15	18	9	5UTR
rno-miR-146a-5p	NM_001107911	Ppp1r8	TGAGAACTGAATTCCATGGGTT#CCCATGGAGAGTTCTGGT#(.((((((...(((((((((..#))))))))))))))).).	1613	1631	1	-21	1	0.000219085	0.5	2.20861	2.22241	-10.2249	16	18	15	3UTR
rno-miR-146a-5p	NM_019249	Ptprf	TGAGAACTGAATTCCATGGGTT#CCATGGAGCTTGAGTTCA#...(((((.((((((((((...#)))))))).)).))))).	4905	4923	1	-20.4	0	0.000218721	0.397	1.35529	1.18759	-7.57093	15	18	8	CDS
rno-miR-146a-5p	XM_008759109	Akt2	TGAGAACTGAATTCCATGGGTT#CCCATGGGGTGCAGC#......(((.((((((((((..#)))))))))).))).	2746	2761	1	-19.2	0	0.000218524	0.353	0	0	-16.8091	13	15	10	3UTR
rno-miR-146a-5p	NM_001271211	Rsad1	TGAGAACTGAATTCCATGGGTT#AGCCCATGGACAATTTGTGCCTCAG#((((.((.((((((((((((((#))))))))))..))))))..)))).	995	1020	1	-20.4	0	0.000214445	0.368	0	0	-10.3702	20	25	10	CDS
rno-miR-146a-5p	XM_039086838	Rsad1	TGAGAACTGAATTCCATGGGTT#AGCCCATGGACAATTTGTGCCTCAG#((((.((.((((((((((((((#))))))))))..))))))..)))).	933	958	1	-20.4	0	0.000214445	0.368	0	0	-10.3702	20	25	10	CDS
rno-miR-146a-5p	XM_039078973	Prtn3	TGAGAACTGAATTCCATGGGTT#ACCCACGGACCCGCTGGAATGGAGTCAGTTCTG#..((((((((((((((((((((#.)))))).))))))....)))))))).	1413	1446	1	-25	1	0.000214419	0.471	0	0	-4.957	20	27	8	3UTR
rno-miR-146a-5p	NM_001108236	Lpin2	TGAGAACTGAATTCCATGGGTT#CCCATGCCCAGAGTTCAGTTCC#...(((((((((((((((((..#))))))....))))))))))).	2703	2725	1	-23.2	0	0.000214254	0.485	1.48751	1.61378	-6.51454	17	22	11	CDS
rno-miR-146a-5p	NM_001109398	Mthfd2	TGAGAACTGAATTCCATGGGTT#GACCCTGGCTTTCCTGAAAGTTCTCAA#(((((((((((..(((.(((((#))))))))..))).....)))))))).	1911	1938	1	-21.7	1	0.000211554	0.574	0.336007	0.555986	-8.57351	19	27	8	3UTR
rno-miR-146a-5p	XM_039108338	Mthfd2	TGAGAACTGAATTCCATGGGTT#GACCCTGGCTTTCCTGAAAGTTCTCAA#(((((((((((..(((.(((((#))))))))..))).....)))))))).	2047	2074	1	-21.7	1	0.000211554	0.574	0	0	-8.57351	19	27	8	3UTR
rno-miR-146a-5p	XM_006238269	Pappa1	TGAGAACTGAATTCCATGGGTT#ACCCATGGAAGTGGGTACTG#..((.(((.(.((((((((((.#)))))))))).).))).)).	3801	3821	1	-20.9	0	0.000209305	0.515	0	0	-12.9572	16	20	10	CDS
rno-miR-146a-5p	XM_039109883	Pappa1	TGAGAACTGAATTCCATGGGTT#ACCCATGGAAGTGGGTACTG#..((.(((.(.((((((((((.#)))))))))).).))).)).	3890	3910	1	-20.9	0	0.000209305	0.515	0	0	-12.9572	16	20	10	CDS
rno-miR-146a-5p	XM_006256858	Asb11	TGAGAACTGAATTCCATGGGTT#GCCCTGGATTCAGTCCTCC#.(((.((((((.((((.((((.#)))))))))))))).))).	1359	1378	1	-21.8	0	0.000208288	0.691	0	0	-11.2592	17	19	14	3UTR
rno-miR-146a-5p	XM_006245338	Sp100	TGAGAACTGAATTCCATGGGTT#ATGGGGTTTAGTTTTCC#.((((((((((((((((.....#)))))))))))))))).	2222	2239	1	-19.5	1	0.000206854	0.456	0	0	-3.79332	16	17	16	3UTR
rno-miR-146a-5p	NM_181376	Spats1	TGAGAACTGAATTCCATGGGTT#CCCGAGGAATTCAGCCTGCTCAA#((((..(((((((((.((((..#)))).)))))))))....)))).	378	401	1	-23.6	0	0.000204872	0.485	0.816829	0.444854	-10.1906	17	23	9	CDS
rno-miR-146a-5p	XM_039102610	Supt20h	TGAGAACTGAATTCCATGGGTT#TCTGTGGAGTTGGCGTTCTGAG#(.((((((.(((((((((((..#))))))))))).).))))).).	243	265	1	-19	1	0.000204135	0.544	0	0	-6.15764	18	22	11	5UTR
rno-miR-146a-5p	XM_039102611	Supt20h	TGAGAACTGAATTCCATGGGTT#TCTGTGGAGTTGGCGTTCTGAG#(.((((((.(((((((((((..#))))))))))).).))))).).	242	264	1	-19	1	0.000204135	0.544	0	0	-6.15764	18	22	11	5UTR
rno-miR-146a-5p	XM_039109990	Mob3c	TGAGAACTGAATTCCATGGGTT#ATCCAGGAGTTCAGC#......(((((((((.(((((.#)))))))))))))).	1104	1119	1	-18.4	0	0.000204092	0.485	0	0	-15.7996	14	15	14	CDS
rno-miR-146a-5p	XM_006237300	Phc1	TGAGAACTGAATTCCATGGGTT#AGCCTTTCCCGGTGGGATGTTCTCAG#(((((((...(((((((.((..#.)).)))))))))))))).	2440	2466	1	-21	1	0.000203222	0.441	0	0	-8.55011	16	19	14	CDS
rno-miR-146a-5p	XM_006237303	Phc1	TGAGAACTGAATTCCATGGGTT#AGCCTTTCCCGGTGGGATGTTCTCAG#(((((((...(((((((.((..#.)).)))))))))))))).	2283	2309	1	-21	1	0.000203222	0.441	0	0	-8.55011	16	19	14	CDS
rno-miR-146a-5p	XM_039113127	Rab30	TGAGAACTGAATTCCATGGGTT#GATCTATGGAATCATAGTTTTCT#.((((((((.((((((((((((#))))))))))))..)))))))).	4004	4027	1	-21.6	1	0.000200628	0.632	0	0	-5.03583	20	23	12	3UTR
rno-miR-146a-5p	XM_039113130	Rab30	TGAGAACTGAATTCCATGGGTT#GATCTATGGAATCATAGTTTTCT#.((((((((.((((((((((((#))))))))))))..)))))))).	3561	3584	1	-21.6	1	0.000200628	0.632	0	0	-5.03583	20	23	12	3UTR
rno-miR-146a-5p	XM_017600895	Kctd16	TGAGAACTGAATTCCATGGGTT#GCTGCTGGAATTCAGTG#.....(((((((((((..(((.#)))..))))))))))).	9346	9363	1	-18.9	0	0.000196518	0.485	0	0	-13.6656	14	17	11	3UTR
rno-miR-146a-5p	NM_001271079	Ppm1h	TGAGAACTGAATTCCATGGGTT#GACCATGTTTCCTTAGGGAAGGGGGTGTGGGATTCAGGCTCC#.(((..(((((((((((.....#.))))))))))).))).	2623	2665	1	-18.6	0	0.000196284	0.426	1.83705	1.7389	-9.81332	14	17	11	3UTR
rno-miR-146a-5p	NM_053018	Cd9	TGAGAACTGAATTCCATGGGTT#GATCCGGGGGTTCGGTTCA#...((((((((((((.((((((#)))))))))))))))))).	902	921	1	-23.1	0	0.00019397	0.662	2.19643	1.62691	-6.74759	18	19	18	3UTR
rno-miR-146a-5p	NM_024357	Htt	TGAGAACTGAATTCCATGGGTT#GACCGGAGGAGTCAGTTCA#...((((((.(((((.(.((((#)))).).))))))))))).	759	778	1	-20.5	0	0.000192711	0.5	-0.314961	-0.237501	-7.9901	16	19	11	CDS
rno-miR-146a-5p	XM_006251230	Htt	TGAGAACTGAATTCCATGGGTT#GACCGGAGGAGTCAGTTCA#...((((((.(((((.(.((((#)))).).))))))))))).	1771	1790	1	-20.5	0	0.000192711	0.5	0	0	-7.9901	16	19	11	CDS
rno-miR-146a-5p	NM_053607	Acsl5	TGAGAACTGAATTCCATGGGTT#CCTGTGGAGGCAAAATTGGGTTCTTC#.(((((((.(((((((((((..#))))))))......))).))))))).	1081	1107	1	-19.1	1	0.000192158	0.544	1.35992	1.03655	-4.84971	18	26	8	CDS
rno-miR-146a-5p	XM_039111057	RGD1310951	TGAGAACTGAATTCCATGGGTT#GCCTGTGTCTGTCGGTTCTCC#.(((((((((....(((((((.#)))))))....))))))))).	3173	3194	1	-21.1	1	0.000189786	0.529	0	0	-12.1109	16	21	9	3UTR
rno-miR-146a-5p	XM_039099680	Rbmx	TGAGAACTGAATTCCATGGGTT#AGCCTTCCATACTCTAATCAGGCCTGGAGTGGGTTCTCT#.(((((((..((((((.((.((#.)).)))))))).))))))).	3163	3202	1	-19.8	1	0.000187611	0.647	0	0	-6.09222	17	21	8	3UTR
rno-miR-146a-5p	NM_001107625	Rtkn2	TGAGAACTGAATTCCATGGGTT#GACCAATGGACAGTTCCTCAT#(((((((((...(((((.((((#)))).))))))))))).))).	1336	1357	1	-18.8	1	0.000186704	0.515	0.630749	0.398081	-11.3517	18	21	11	CDS
rno-miR-146a-5p	NM_001106875	Acer1	TGAGAACTGAATTCCATGGGTT#ACCCGTATGCCCAGAAGCGTTCCTGGGGTATCTATGGAGTGTCAGTCCTCT#.(((.((((((((((((((((.#.))))))))))).))))).))).	192	243	1	-23.2	0	0.000184611	0.529	0.867611	0.802181	-7.91236	19	23	11	CDS
rno-miR-146a-5p	XM_039100849	Acp7	TGAGAACTGAATTCCATGGGTT#GCCCACGGAGGCCAGTGGAGTCAGTTCTCT#.((((((((.(((((((.((((#.)))).))))))))))))))).	432	462	1	-26	1	0.00018374	0.382	0	0	-5.03583	19	22	15	5UTR
rno-miR-146a-5p	NM_001012216	Tmc5	TGAGAACTGAATTCCATGGGTT#GGCCCTGGGTTTGGTCCTCAG#((((.((((((.((((.(((((#))))))))))))))).)))).	2846	2867	1	-19.7	0	0.000177513	0.574	0.70684	0.028526	-11.4034	19	21	15	3UTR
rno-miR-146a-5p	NM_001191760	Dock11	TGAGAACTGAATTCCATGGGTT#CCCATGGAAGACATATCTCT#.((((..((..(((((((((..#)))))))))..))..)))).	300	320	1	-21.7	0	0.000177077	0.529	1.92799	1.57074	-11.3053	15	20	9	CDS
rno-miR-146a-5p	XM_006257453	Dock11	TGAGAACTGAATTCCATGGGTT#CCCATGGAAGACATATCTCT#.((((..((..(((((((((..#)))))))))..))..)))).	488	508	1	-21.7	0	0.000177077	0.529	0	0	-11.3053	15	20	9	CDS
rno-miR-146a-5p	XM_017602037	Dock11	TGAGAACTGAATTCCATGGGTT#CCCATGGAAGACATATCTCT#.((((..((..(((((((((..#)))))))))..))..)))).	489	509	1	-21.7	0	0.000177077	0.529	0	0	-11.3053	15	20	9	CDS
rno-miR-146a-5p	NM_001107334	Mfsd14b	TGAGAACTGAATTCCATGGGTT#AACCGGTGGAGTTCAGA#......(((((((((((.((((#)))).))))))))))).	1722	1739	1	-23	0	0.000176251	0.544	1.57535	1.6815	-15.5666	15	17	11	CDS
rno-miR-146a-5p	XM_008772166	Mapk4	TGAGAACTGAATTCCATGGGTT#GATCCATGGAGATACAAGATAATGATTCGGGCTTCTCC#.(((((((((((((((((((((#))))))))))..............))))))..))))).	597	635	1	-20.8	1	0.00017451	0.588	0	0	-3.79332	21	38	10	5UTR
rno-miR-146a-5p	XM_039097050	Mapk4	TGAGAACTGAATTCCATGGGTT#GATCCATGGAGATACAAGATAATGATTCGGGCTTCTCC#.(((((((((((((((((((((#))))))))))..............))))))..))))).	597	635	1	-20.8	1	0.00017451	0.588	0	0	-3.79332	21	38	10	5UTR
rno-miR-146a-5p	NM_001106809	Vps26b	TGAGAACTGAATTCCATGGGTT#GACATACAATCCCCATGGGAACAGGTTCA#...(((((...(((((((((..#.)))))))))...))))).	3011	3040	1	-21.6	0	0.000174392	0.471	2.05462	1.6539	-11.6382	14	19	9	3UTR
rno-miR-146a-5p	NM_001271363	Astn2	TGAGAACTGAATTCCATGGGTT#AACTGGGGAGTGCAGTTGTCAC#(((.(((((.(((((.(.((((#)))).)))))).))))).))).	1631	1653	1	-18.6	0	0.000174009	0.426	1.79505	1.80609	-8.44515	18	22	6	CDS
rno-miR-146a-5p	NM_031143	Dgkz	TGAGAACTGAATTCCATGGGTT#GCCCACGTCACCCTGGAGTTTCATGAGTCTCGA#((((.(((((((((((.((((.#.))))))))))))....))))))).	1552	1585	1	-19.6	0	0.000173424	0.471	2.12298	1.66532	-8.05661	19	25	12	CDS
rno-miR-146a-5p	NM_001106159	Stard4	TGAGAACTGAATTCCATGGGTT#CCCAGAGGGTTGGTTCTCAG#((((((((.(((((..((((..#))))..))))))))))))).	2347	2367	1	-20.5	1	0.000171508	0.485	1.83944	1.26492	-5.96246	17	20	13	3UTR
rno-miR-146a-5p	NM_001106395	Foxo3	TGAGAACTGAATTCCATGGGTT#CCCGTGGAGCAGAACTCT#.(((..(((..(((((((((..#))))))))))))..))).	2550	2568	1	-19.4	0	0.000171478	0.5	0.677071	0.915622	-13.8806	15	18	12	3UTR
rno-miR-146a-5p	XM_039091496	Iars2	TGAGAACTGAATTCCATGGGTT#AGCCATGGAGATCAGGGAGAAAGCCAGGTCGTTTGCTCAA#((((..((((.((((((((.(.#).)))))))).))))....................)))).	639	679	1	-18.8	0	0.000168856	0.485	0	0	-12.7823	17	40	8	CDS
rno-miR-146a-5p	NM_001109066	Spring1	TGAGAACTGAATTCCATGGGTT#GCCCTGGTTTTCGGGCTCTCG#.((((.(((((..(((.((((.#)))))))..)))))..)))).	155	176	1	-21.6	0	0.000168824	0.426	0.0583702	-0.00691524	-10.3302	16	21	7	CDS
rno-miR-146a-5p	XM_039107284	Lrguk	TGAGAACTGAATTCCATGGGTT#AATTCAGGGGAATCAGTTTTCAT#((((((((((.((((.((((((#)))))).)))).)))))))))).	4463	4486	1	-21	1	0.000165523	0.676	0	0	-6.9954	20	23	10	3UTR
rno-miR-146a-5p	NM_001004241	Samm50	TGAGAACTGAATTCCATGGGTT#CCCATGGAGCTCACTTCG#...(((.(((.(((((((((..#))))))))).))).))).	658	676	1	-20.1	0	0.000165304	0.471	2.09256	1.5832	-10.883	15	18	9	CDS
rno-miR-146a-5p	NM_201990	Pgap1	TGAGAACTGAATTCCATGGGTT#CAGGAATTCCTGTTCTCT#.((((((.(((((((.((....#)))))))))..)))))).	270	288	1	-18.3	1	0.000165234	0.588	-0.210135	0.258955	-6.34001	15	18	9	CDS
rno-miR-146a-5p	XM_017589707	Pcgf5	TGAGAACTGAATTCCATGGGTT#AATCCTTGTGGTGTTGCAGTTTTCAC#((((((((((((.(((((((((#)))))..)))).))).))))))))).	1434	1460	1	-19.9	1	0.000164733	0.721	0	0	-5.22671	21	26	9	3UTR
rno-miR-146a-5p	XM_006240697	Itgb8	TGAGAACTGAATTCCATGGGTT#CCCATGGATACATTCATGTGCTGTCTCT#.(((((((((((((((((((..#))))))))...))))).))....)))).	1672	1700	1	-20.4	1	0.000163752	0.574	0	0	-3.79332	19	28	8	CDS
rno-miR-146a-5p	NM_031715	Pfkm	TGAGAACTGAATTCCATGGGTT#AACCCGTGGTTCTCGTCTCAA#(((((...(((..(((((((((#))))))))))))...))))).	913	934	1	-21.3	0	0.000163363	0.485	1.66505	1.74908	-14.3318	17	21	12	CDS
rno-miR-146a-5p	XM_039079863	Pfkm	TGAGAACTGAATTCCATGGGTT#AACCCGTGGTTCTCGTCTCAA#(((((...(((..(((((((((#))))))))))))...))))).	1089	1110	1	-21.3	0	0.000163363	0.485	0	0	-14.3318	17	21	12	CDS
rno-miR-146a-5p	NM_001107687	Rab25	TGAGAACTGAATTCCATGGGTT#GCAATGAATTCAGCCACGACAGCCGCACCACCATCGGGGTTGAGTTCTCC#.(((((((.((((((((((...#.)))).)))))).))))))).	327	377	1	-23.5	1	0.000162768	0.338	0.938356	1.10798	-4.84971	17	21	7	CDS
rno-miR-146a-5p	XM_008759233	LOC100912787	TGAGAACTGAATTCCATGGGTT#AATCCAGACATAGATTTCAGTTCTCAG#(((((((((((.((..((((((#))))))......)).))))))))))).	639	666	1	-21.3	1	0.000162288	0.588	0	0	-8.25288	19	27	11	CDS
rno-miR-146a-5p	XM_008759940	LOC103691238	TGAGAACTGAATTCCATGGGTT#AACTCATGGATCAGCTTCTA#..((((((((..((((((((((#)))))))))))))).)))).	3553	3573	1	-20.3	1	0.000162104	0.618	0	0	-11.1286	18	20	14	3UTR
rno-miR-146a-5p	NM_017031	Pde4b	TGAGAACTGAATTCCATGGGTT#GGCTGAATGGATTCAGTGAGTCTCAG#(((((((((((.(((((.((((#))))..)))))))))))...))))).	179	205	1	-18.9	1	0.000160917	0.529	1.4865	1.22526	-7.28438	20	26	11	5UTR
rno-miR-146a-5p	XM_006245546	Olr1353	TGAGAACTGAATTCCATGGGTT#TCCAGAGGACCTGAGTTTGGTTCTCAG#((((((((((((((...(((((#.))))))))))))))))))).	1988	2015	1	-21.8	1	0.000159255	0.456	0	0	-4.90607	19	21	19	3UTR
rno-miR-146a-5p	XM_006247803	Engase	TGAGAACTGAATTCCATGGGTT#ACCCACATCCTCCTGTAATGCTCTCCGTGGGATGTGGTTCTCAA#((((((((..((((((((((..#.))))))))))..)))))))).	2520	2564	1	-25.9	1	0.000158437	0.5	0	0	-6.23647	18	22	10	3UTR
rno-miR-146a-5p	XM_006247804	Engase	TGAGAACTGAATTCCATGGGTT#ACCCACATCCTCCTGTAATGCTCTCCGTGGGATGTGGTTCTCAA#((((((((..((((((((((..#.))))))))))..)))))))).	2380	2424	1	-25.9	1	0.000158437	0.5	0	0	-6.23647	18	22	10	3UTR
rno-miR-146a-5p	NM_001106958	Gpr143	TGAGAACTGAATTCCATGGGTT#ACCCATGGAGGCTCTCT#.((((.((....(((((((((.#))))))))))).)))).	891	908	1	-19.7	0	0.000158313	0.485	0.619119	1.60051	-14.1648	15	17	11	CDS
rno-miR-146a-5p	XM_039108548	Nom1	TGAGAACTGAATTCCATGGGTT#GGCCCTGGGTTCGGTTCTCAG#(((((((((((.((((.(((((#)))))))))))))))))))).	5512	5533	1	-27	1	0.000156807	0.603	0	0	-7.28438	20	21	20	3UTR
rno-miR-146a-5p	XM_039100624	Klf8	TGAGAACTGAATTCCATGGGTT#CTCATTGTGATAGTTTCTTGGAGTTCTTTGTTCTCAA#(((((((.((((((((.(((..#.))).))))))))...))))))).	4366	4403	1	-20.4	1	0.000156376	0.603	0	0	-6.25121	18	24	8	3UTR
rno-miR-146a-5p	NM_001108539	Hace1	TGAGAACTGAATTCCATGGGTT#GATCTGTGGAGTGCTTGGTTCTTC#.(((((((((((((((((((((#))))))))))))..))))))))).	226	250	1	-20.8	1	0.000155815	0.544	2.08273	2.27137	-3.79332	21	24	12	CDS
rno-miR-146a-5p	NM_057195	Smu1	TGAGAACTGAATTCCATGGGTT#CCACGTGGAGTGCGCTCGGTTCTCT#.(((((((((((((((((((..#)).))))))))....))))))))).	669	694	1	-24.4	1	0.000154693	0.412	1.93124	2.04844	-3.79332	19	25	9	CDS
rno-miR-146a-5p	XM_039103327	LOC120100586	TGAGAACTGAATTCCATGGGTT#CCTGTGGAGTGGGTGCTCAG#((((.(((..((((((((((..#)))))))))).))).)))).	383	403	1	-20.2	0	0.000154249	0.485	0	0	-10.3555	17	20	10	5UTR
rno-miR-146a-5p	NM_019148	Strn	TGAGAACTGAATTCCATGGGTT#ATCCAGGAGTTCACAGCTCAT#((((...((((((((.(((((.#)))))))))))))...)))).	2264	2285	1	-20	0	0.000153636	0.588	1.10767	1.51814	-11.7343	17	21	13	CDS
rno-miR-146a-5p	XM_006239622	Strn	TGAGAACTGAATTCCATGGGTT#ATCCAGGAGTTCACAGCTCAT#((((...((((((((.(((((.#)))))))))))))...)))).	2456	2477	1	-20	0	0.000153636	0.588	0	0	-11.7343	17	21	13	CDS
rno-miR-146a-5p	NM_001108501	Ccp110	TGAGAACTGAATTCCATGGGTT#GACTCAGAGGTGTTTGGTTCTCT#.(((((((((((.((.((((((#))))))..)).))))))))))).	782	805	1	-21.9	1	0.000152327	0.485	0.134173	0.232314	-5.3155	19	23	11	CDS
rno-miR-146a-5p	XM_039082806	Ccp110	TGAGAACTGAATTCCATGGGTT#GACTCAGAGGTGTTTGGTTCTCT#.(((((((((((.((.((((((#))))))..)).))))))))))).	862	885	1	-21.9	1	0.000152327	0.485	0	0	-5.3155	19	23	11	CDS
rno-miR-146a-5p	XM_039082822	Ccp110	TGAGAACTGAATTCCATGGGTT#GACTCAGAGGTGTTTGGTTCTCT#.(((((((((((.((.((((((#))))))..)).))))))))))).	862	885	1	-21.9	1	0.000152327	0.485	0	0	-5.3155	19	23	11	CDS
rno-miR-146a-5p	XM_039082825	Ccp110	TGAGAACTGAATTCCATGGGTT#GACTCAGAGGTGTTTGGTTCTCT#.(((((((((((.((.((((((#))))))..)).))))))))))).	862	885	1	-21.9	1	0.000152327	0.485	0	0	-5.3155	19	23	11	CDS
rno-miR-146a-5p	XM_223012	Tp53bp2	TGAGAACTGAATTCCATGGGTT#CCCAGTTTCTCTATGGGGTTCAGG#......((((((((((((((..#.)))))))))))))).	3381	3405	1	-19.8	0	0.000152105	0.5	0	0	-15.5666	14	16	14	CDS
rno-miR-146a-5p	XM_039103390	Adgrv1	TGAGAACTGAATTCCATGGGTT#GGCCCTGAGGAATTCGTTCTTG#.((((((.(((((((..(((((#)))))...))))))))))))).	13143	13165	1	-21.5	1	0.00015179	0.5	0	0	-6.34001	18	22	13	CDS
rno-miR-146a-5p	NM_022628	Nphs1	TGAGAACTGAATTCCATGGGTT#GCTCTTGCAGAGGACCCGAGTTTGGTTCTCAG#((((((((((((((...(((((#.))))))))))))))))))).	4628	4660	1	-23.5	1	0.000149383	0.5	-0.0835435	0.0209823	-4.90607	19	21	19	3UTR
rno-miR-146a-5p	XM_006250462	Angel2	TGAGAACTGAATTCCATGGGTT#AACCCAGTGGAGTTCT#........((((((((((((((#)))))).)))))))).	799	815	1	-18.8	0	0.000148609	0.5	0	0	-19.4239	14	16	8	CDS
rno-miR-146a-5p	XM_039090819	Angel2	TGAGAACTGAATTCCATGGGTT#AACCCAGTGGAGTTCT#........((((((((((((((#)))))).)))))))).	2434	2450	1	-18.8	0	0.000148609	0.5	0	0	-19.4239	14	16	8	CDS
rno-miR-146a-5p	XM_039109641	Zfp46	TGAGAACTGAATTCCATGGGTT#GTGGAGTTCAGCATTCTCC#.((((((((((((((((.....#)))))))))))..))))).	4518	4537	1	-20.1	1	0.000148077	0.5	0	0	-3.79332	16	19	11	3UTR
rno-miR-146a-5p	XM_006232515	Map9	TGAGAACTGAATTCCATGGGTT#CTCAGAGTGCTCTCTGTCTGGGATTCAGGACTCAG#((((..((((((((((......#.))))))))))..)))).	3777	3812	1	-20.4	0	0.000147107	0.544	0	0	-9.95757	14	18	10	3UTR
rno-miR-146a-5p	NM_001100810	Rnpc3	TGAGAACTGAATTCCATGGGTT#AGCCCATGGTGGTTCAGTTTGCTCGA#((((((((((((((((((((((#))))))))).)))))))))..)))).	1523	1549	1	-26.8	1	0.000146878	0.544	2.01971	1.44768	-3.93757	22	26	9	CDS
rno-miR-146a-5p	NM_145779	Pzp	TGAGAACTGAATTCCATGGGTT#AACTCTAGAGTATGGAGTACAGTACTCAA#((((.((((.((((((((....#.)))))))).)))).)))).	240	269	1	-19	0	0.000146725	0.544	0.491511	1.14215	-9.29912	16	20	8	CDS
rno-miR-146a-5p	XM_006245226	Cnppd1	TGAGAACTGAATTCCATGGGTT#AGCCCAGGAGGGTAGATTTCT#.((((.(((..((((.((((((#))))))))))..))).)))).	2461	2482	1	-17	0	0.000146488	0.544	0	0	-9.99461	17	21	10	3UTR
rno-miR-146a-5p	XM_039087752	Atxn7l3	TGAGAACTGAATTCCATGGGTT#AACCCCAGTCTCCCCTGGGGTGGTTCTCAC#((((((((..((((((.(((..#.))).)))))))))))))).	2890	2920	1	-21.2	1	0.000145887	0.441	0	0	-6.23647	17	20	14	3UTR
rno-miR-146a-5p	XM_039087756	Atxn7l3	TGAGAACTGAATTCCATGGGTT#AACCCCAGTCTCCCCTGGGGTGGTTCTCAC#((((((((..((((((.(((..#.))).)))))))))))))).	2827	2857	1	-21.2	1	0.000145887	0.441	0	0	-6.23647	17	20	14	3UTR
rno-miR-146a-5p	XM_039084411	RGD1559960	TGAGAACTGAATTCCATGGGTT#CCCATGGAGGGAAGTCTTCAA#((((.(((...(((((((((..#)))))))))...))).)))).	839	860	1	-21.1	0	0.000145317	0.529	0	0	-13.1803	16	21	9	5UTR
rno-miR-146a-5p	NM_019189	Hapln1	TGAGAACTGAATTCCATGGGTT#GCCCTGGAGTCAGTTCTCGA#(((((((((.((((((.((((.#))))))))))))))))))).	1142	1162	1	-27.2	1	0.000145215	0.559	-0.00805518	1.41743	-5.18008	19	20	19	3UTR
rno-miR-146a-5p	NM_017158	Cyp2c7	TGAGAACTGAATTCCATGGGTT#GAGCTCCCCATGGATGCAGGTCTGCAA#(((((.(((...((((((((..#.))))))))..))).))).)).	644	671	1	-20	0	0.000142415	0.588	0	0	-13.2526	16	22	8	CDS
rno-miR-146a-5p	XM_008762730	Zfp804b	TGAGAACTGAATTCCATGGGTT#AATCCAAGCTGGATTTCAGTTCC#...((((((((.((((((((((#))))))...)))).)))))))).	7704	7727	1	-21	0	0.00014174	0.574	0	0	-9.86134	18	23	8	3UTR
rno-miR-146a-5p	XM_228962	Klhl34	TGAGAACTGAATTCCATGGGTT#GGCCCAGAGATTGGGGTTCTCT#.(((((((....((..((((((#))))))..))....))))))).	1997	2019	1	-20	1	0.000141686	0.515	0	0	-13.2323	15	22	7	5UTR
rno-miR-146a-5p	XM_008769342	Ankle2	TGAGAACTGAATTCCATGGGTT#GGCCCCAACAGCCCCCAACTTGGGGTTCAGGCTGGTCTGGAACCTGGGTTCTCAT#((((((((((((((((((((..#.))))...)))))))))..................))))))).	5362	5417	1	-21.8	1	0.000138804	0.426	0	0	-3.93757	20	43	9	CDS
rno-miR-146a-5p	XM_006234425	Cwc22	TGAGAACTGAATTCCATGGGTT#GCTCACCTTTTATACACAGACTCACTTCCGTGGAGTGTTCTCGA#(((((((...((((((((((..#.))))))))))))))))).	1899	1943	1	-21.4	1	0.000138246	0.544	0	0	-8.55011	17	19	17	CDS
rno-miR-146a-5p	XM_342453	Cwc22	TGAGAACTGAATTCCATGGGTT#GCTCACCTTTTATACACAGACTCACTTCCGTGGAGTGTTCTCGA#(((((((...((((((((((..#.))))))))))))))))).	1902	1946	1	-21.4	1	0.000138246	0.544	0	0	-8.55011	17	19	17	CDS
rno-miR-146a-5p	NM_001008831	RT1-Ba	TGAGAACTGAATTCCATGGGTT#GCCCTTGGAATTCTCCTCTGAT#(.(((...((((((((.((((.#)))).))))))))...))).).	1002	1024	1	-20.1	0	0.000136656	0.574	-0.142897	0.16099	-10.8595	16	22	8	3UTR
rno-miR-146a-5p	NM_022261	Bspry	TGAGAACTGAATTCCATGGGTT#AGCCCTCTACTGACTCAACTGTGGGCAACATCGGTTCTCGG#((((((((((..(((((((...#.))))))).....)))))))))).	806	847	1	-19.9	1	0.000135759	0.456	1.13446	1.12356	-10.1092	17	24	10	CDS
rno-miR-146a-5p	NM_022179	Hk3	TGAGAACTGAATTCCATGGGTT#CCCGTGGAGAATCAGGGTCTGAA#(.(((.((((.(((((((((..#)))))))))..))))..))).).	542	565	1	-20.8	0	0.000132644	0.544	0.0619152	1.51921	-9.82698	17	23	9	CDS
rno-miR-146a-5p	NM_001037354	Klf11	TGAGAACTGAATTCCATGGGTT#GGCCTTGGGGGGTTCGGTTGCTCAT#(((((((((((((((..(((((#)))))...))))))))))).)))).	3333	3358	1	-23.2	1	0.000132184	0.485	0.271894	0.0524486	-4.17062	20	25	11	3UTR
rno-miR-146a-5p	NM_173290	Yy1	TGAGAACTGAATTCCATGGGTT#GACCCTGGAGGGCGAGTTCTCGG#(((((((((..(((((.(((((#))))))))))..).)))))))).	629	652	1	-24.1	1	0.000131988	0.5	2.19863	2.24561	-8.00486	19	23	10	CDS
rno-miR-146a-5p	NM_001277668	Mcpt1l1	TGAGAACTGAATTCCATGGGTT#ACCCTTGGAGTTCAT#.......(((((((((.((((.#)))).))))))))).	256	271	1	-19	0	0.000130671	0.544	-0.513215	0.149618	-17.1102	13	15	9	CDS
rno-miR-146a-5p	NM_001006597	Olr990	TGAGAACTGAATTCCATGGGTT#CCTTAAAATCTCTTGTTCAGACACGTGGTTCATGGAGCACACAGTTCTCAT#(((((((((..(((((((((..#.)))))))))....))))))))).	542	593	1	-22.1	1	0.000130302	0.544	0	0	-8.00486	18	24	9	CDS
rno-miR-146a-5p	NM_001106272	Zfp592	TGAGAACTGAATTCCATGGGTT#GCCCATGGGAGCTCTGGGTTCTGGA#(.((((((((.((((((((((.#))))))))))..))..)))))).).	4883	4908	1	-23.2	1	0.000129217	0.471	0	0	-7.92602	19	25	10	3UTR
rno-miR-146a-5p	XM_039095064	LOC120097482	TGAGAACTGAATTCCATGGGTT#CCCGTGGTAACAATTCAGTTCA#...(((((((((((((((((..#)))))))....)))))))))).	4461	4483	1	-23.7	0	0.000127168	0.574	0	0	-6.51454	17	22	10	3UTR
rno-miR-146a-5p	XM_006240471	Slc24a4	TGAGAACTGAATTCCATGGGTT#ACCCATGGAGATGTCGGTG#.....(((((.((((((((((.#))))))))))...))))).	1989	2008	1	-20.9	0	0.000126095	0.485	0	0	-16.4904	15	19	10	CDS
rno-miR-146a-5p	XM_039101269	Muc5ac	TGAGAACTGAATTCCATGGGTT#AGCCAAAGGGTACAAGTTCTGTGAGAAGCCATGGAATGTTGAGTGCAGGGCTCAGTTCTTT#.((((((((((((((((((.((#.)).)))))))))..............))))))))).	4901	4962	1	-23.6	1	0.000125025	0.471	0	0	-3.79332	20	37	9	CDS
rno-miR-146a-5p	NM_001107744	Nup160	TGAGAACTGAATTCCATGGGTT#AAGCCGTGGATTTGGTCTCT#.(((.((((((.(((((((.((#)).)))))))))))))))).	4512	4532	1	-19.4	0	0.000124569	0.603	1.13227	1.15142	-11.2592	18	20	16	CDS
rno-miR-146a-5p	XM_039083767	Sned1	TGAGAACTGAATTCCATGGGTT#AACCCAGCCACCCAGGTTCTCAG#((((((((........((((((#))))))........)))))))).	3900	3923	1	-19.3	1	0.000123904	0.441	0	0	-15.5225	14	23	8	CDS
rno-miR-146a-5p	NM_001134688	Ccdc40	TGAGAACTGAATTCCATGGGTT#CCCGTGGGATAGTTTCAGTTTTA#..((((((((((((((((((..#))))))))))....)))))))).	5123	5146	1	-22.8	1	0.000122516	0.6	0	0	-4.957	18	23	10	3UTR
rno-miR-146a-5p	NM_053652	Flt4	TGAGAACTGAATTCCATGGGTT#ACCTATGGGGTACCCCAACCTCTCAGTGTTCAG#((((.((((((((((((((((.#)))))))))))...........))))).)))).	1338	1371	1	-20.3	0	0.000121796	0.412	0.702153	1.21514	-8.05661	20	33	11	CDS
rno-miR-146a-5p	NM_001302217	Elavl2	TGAGAACTGAATTCCATGGGTT#GGCTTATGGAGTGAAGAGGTTTTCAC#((((((((..((((((((((((#)))))))))))).....)))))))).	1402	1428	1	-21.2	1	0.000120565	0.574	1.49969	1.964	-6.23647	20	26	12	CDS
rno-miR-146a-5p	XM_039111240	Csmd2	TGAGAACTGAATTCCATGGGTT#GACCTGTGGAAAGCGGGGTTCTCC#.(((((((...(((((((((((#))))))))))).....))))))).	4126	4150	1	-23.1	1	0.000120038	0.368	0	0	-8.917	18	24	11	CDS
rno-miR-146a-5p	XM_006234533	Nr1h3	TGAGAACTGAATTCCATGGGTT#GACTTTGCCAAAGCAGGGCTGCAGGTGGAGTTCATTAACCCCATCTTTGAGTTCTCC#.((((((((((((((((..((.#.))..))))))))))................)))))).	1155	1212	1	-18.9	1	0.000119004	0.559	0	0	-3.79332	18	38	10	CDS
rno-miR-146a-5p	XM_039087131	Ubtd2	TGAGAACTGAATTCCATGGGTT#GCTCTGGATTCCCTATGAGTGGATTTAGTTCTGAG#(.((((((((((((((((((..#.))))))...)))))))))))).).	1131	1166	1	-21.1	1	0.000118038	0.574	0	0	-5.10125	19	25	12	3UTR
rno-miR-146a-5p	NM_001029920	Vstm4	TGAGAACTGAATTCCATGGGTT#GACCTTGGGACATAAGTCCATGGGGGAAGTTGCTCT#.(((((((...(((((((((..#.)))))))))..)))).))).	1915	1951	1	-19.1	1	0.000117901	0.544	-0.471314	-0.0320789	-8.917	16	21	9	3UTR
rno-miR-146a-5p	NM_001105825	Ppm1d	TGAGAACTGAATTCCATGGGTT#AGCTCATGTAGGTGACTCTGGAGTGGTCCTTGGAATTCAGG#......((((((((((.(((..#.))).)))))))))).	757	798	1	-18.9	0	0.00011644	0.529	2.16693	1.7693	-15.5666	13	16	10	CDS
rno-miR-146a-5p	XM_006241809	Gsdmd	TGAGAACTGAATTCCATGGGTT#GACCCAGGAGTTGGGAAAAACTCAA#((((..((.((((((.((((((#)))))))))))).)).....)))).	2149	2174	1	-20.3	0	0.000115985	0.644	0	0	-11.247	18	25	12	3UTR
rno-miR-146a-5p	XM_039108984	LOC103692025	TGAGAACTGAATTCCATGGGTT#GGCCCATGGAGTGTCACGTCTTG#.((((..(((((((((((((((#)))))))))))).)))..)))).	1459	1482	1	-23.1	0	0.000114642	0.412	0	0	-7.23797	19	23	12	3UTR
rno-miR-146a-5p	NM_001000353	Olr678	TGAGAACTGAATTCCATGGGTT#CCTATGGGGTCATCTTGTTCTCT#.((((((.((((((((((((..#))))))))))..))..)))))).	646	669	1	-21.1	1	0.000112719	0.515	0.492693	0.302119	-6.10696	18	23	10	CDS
rno-miR-146a-5p	NM_001166267	RGD1562885	TGAGAACTGAATTCCATGGGTT#CCCATGGAGTCCTGGCCCTCAG#((((..(((.((((((((((..#)))))))))).).))..)))).	360	382	1	-20.6	0	0.000109627	0.368	0	0	-11.2001	17	22	10	CDS
rno-miR-146a-5p	XM_039080007	Pmel	TGAGAACTGAATTCCATGGGTT#AACCCTGGGCTTCCTTCCTGTGGACATTAGACTTGGGTTAAGGACAGTTCTCT#.(((((((((((((((((((..#.)))))))).)))................)))))))).	721	774	1	-19.5	1	0.000108527	0.529	0	0	-3.79332	19	38	8	5UTR
rno-miR-146a-5p	XM_008767722	Trim7	TGAGAACTGAATTCCATGGGTT#TCCTGAGTTCAGTTCTCAG#((((((((((((((...(((..#))).)))))))))))))).	4075	4094	1	-22.8	1	0.000107462	0.5	0	0	-4.90607	17	19	14	3UTR
rno-miR-146a-5p	XM_039092519	Rfc1	TGAGAACTGAATTCCATGGGTT#AACCAGTGGAGTGTGTTTCGTGGAGATCGGTTCA#...(((((((.(((((((((..#.))))))))).))))))).	4731	4765	1	-20.2	0	0.000107393	0.574	0	0	-9.33931	16	19	9	3UTR
rno-miR-146a-5p	XM_006235252	Rbck1	TGAGAACTGAATTCCATGGGTT#AGCCCATGGGGTCCAGCTCTGCAT#(((((.(((.((((((((((((#)))))))))))).))).))).)).	2203	2227	1	-24.2	0	0.000105443	0.5	0	0	-7.08104	20	24	12	3UTR
rno-miR-146a-5p	NM_001170548	Thumpd3	TGAGAACTGAATTCCATGGGTT#ACTCTTGCCTATGGGATGCTCAGGCTCT#.(((..(((((((((((((((.#.)))))))))))..)))).))).	986	1014	1	-22.6	0	0.00010505	0.559	0	0	-9.81332	18	23	11	CDS
rno-miR-146a-5p	XM_006237049	Thumpd3	TGAGAACTGAATTCCATGGGTT#ACTCTTGCCTATGGGATGCTCAGGCTCT#.(((..(((((((((((((((.#.)))))))))))..)))).))).	1360	1388	1	-22.6	0	0.00010505	0.559	0	0	-9.81332	18	23	11	CDS
rno-miR-146a-5p	XM_006233627	Fbxw5	TGAGAACTGAATTCCATGGGTT#CCTATGGAGGGAGCAGTTCTA#..(((((((..(((((((((..#)))))))))....))))))).	500	521	1	-22.7	1	0.000104443	0.397	0	0	-9.02428	16	21	9	CDS
rno-miR-146a-5p	NM_001108339	Gatc	TGAGAACTGAATTCCATGGGTT#AGCCCCTGGAGTCGGTTCTGGA#(.(((((((.((((((.(((((#))))).))))))))))))).).	289	311	1	-24.4	1	0.000102976	0.397	0	0	-6.34376	19	22	13	CDS
rno-miR-146a-5p	XM_008766594	Col6a5	TGAGAACTGAATTCCATGGGTT#AGCATCCATCCTCACGGCCACCATGGAGTTCAGTG#.....(((((((((((((((((#.))))..))))))))))))).	5897	5932	1	-22.5	0	0.000101566	0.441	0	0	-13.6656	17	21	13	CDS
rno-miR-146a-5p	XM_039091668	Fras1	TGAGAACTGAATTCCATGGGTT#GACCCTTGGAATCGGTTCA#...((((((.((((((.(((((#))))).)))))))))))).	3329	3348	1	-23.6	0	0.000100758	0.529	0	0	-7.75705	17	19	12	CDS
rno-miR-146a-5p	XM_039107900	Ptdss2	TGAGAACTGAATTCCATGGGTT#CCCATTCGTGTGTGCACATGTCCATGCAGGATACGGTTCTCAC#(((((((((.((((((((((..#.))))))..)))).))))))))).	2154	2197	1	-21.6	1	9.96162e-05	0.456	0	0	-5.18008	19	24	9	3UTR
rno-miR-146a-5p	XM_008759956	RGD1559891	TGAGAACTGAATTCCATGGGTT#ACCTAGTGGGGTTGGTTCTCT#.(((((((.((((((((((((.#))))).)))))))))))))).	2602	2623	1	-21.6	1	9.59079e-05	0.544	0	0	-4.84971	19	21	14	3UTR
rno-miR-146a-5p	XM_039110613	Gmeb1	TGAGAACTGAATTCCATGGGTT#CCCGTGGGTCAGTCTTTCTCC#.(((((((((..((((((((..#)))))))))))))...)))).	1357	1378	1	-21.3	1	9.45341e-05	0.426	0	0	-9.9649	17	21	13	CDS
rno-miR-146a-5p	XM_039113281	Rad51b	TGAGAACTGAATTCCATGGGTT#AGCCCTGGGGTTTGGTGGAGCAACAGTGCTAATCTCC#.(((((((((((((((.(((((#))))))))))))))))................)))).	1831	1868	1	-19.7	1	9.40573e-05	0.441	0	0	-3.79332	20	37	16	3UTR
rno-miR-146a-5p	XM_039092825	Fam193a	TGAGAACTGAATTCCATGGGTT#AACCTATGGGGAGCAATTCTCAT#((((((.((..(((((((((((#)))))))))))..)).)))))).	7241	7264	1	-22.2	0	9.38437e-05	0.632	0	0	-9.54854	19	23	11	3UTR
rno-miR-146a-5p	XM_223536	Fam193a	TGAGAACTGAATTCCATGGGTT#AACCTATGGGGAGCAATTCTCAT#((((((.((..(((((((((((#)))))))))))..)).)))))).	7049	7072	1	-22.2	0	9.38437e-05	0.632	0	0	-9.54854	19	23	11	3UTR
rno-miR-146a-5p	NM_001107993	Ubiad1	TGAGAACTGAATTCCATGGGTT#GGCCCTGAGACCCTGGAGCTTCAGTGCCTCAC#((((.(((((((((((.(((((#.)))))))))).))))))..)))).	455	487	1	-24.5	0	9.36023e-05	0.382	0.242037	0.118215	-8.05661	20	25	10	CDS
rno-miR-146a-5p	XM_017600921	Dsg3	TGAGAACTGAATTCCATGGGTT#GGCCTAAAATCACATGGAGTGAAGTGTGTCTCAT#((((((((..((((((((((((#.)))).))))))))..)))...))))).	4585	4619	1	-20.5	1	9.26322e-05	0.647	0	0	-6.23647	20	28	8	3UTR
rno-miR-146a-5p	XM_039112258	Arid4a	TGAGAACTGAATTCCATGGGTT#CTGTGGAGTGGGGGTATTTGAACCCAGGTCTTGGTTCTCC#.(((((((((...((.((((((#.))))))))..))))))))).	314	354	1	-20.1	1	9.24594e-05	0.559	0	0	-11.4871	17	21	9	5UTR
rno-miR-146a-5p	NM_031351	Atrn	TGAGAACTGAATTCCATGGGTT#GACCGATGGTCAGTTCTCC#.(((((((((...((((.((((#)))).))))))))))))).	1860	1879	1	-23.8	1	9.21165e-05	0.485	1.75946	1.8736	-11.254	17	19	13	CDS
rno-miR-146a-5p	NM_031623	Grb14	TGAGAACTGAATTCCATGGGTT#AGCTCGTGGAGTTCTACCAGCTCAA#((((....((((((((((((((#))))))))))))))......)))).	1606	1631	1	-22.6	0	9.09024e-05	0.456	1.30665	1.2682	-13.8149	18	25	14	CDS
rno-miR-146a-5p	XM_008769706	Mroh9	TGAGAACTGAATTCCATGGGTT#AGCTCATGGAGTTCCCAGTCCCTGCAGACAAAGTTCTG#..((((((((((((((((((((#)))))))))))))).................)))))).	1134	1172	1	-22.8	1	8.91637e-05	0.441	0	0	-4.957	20	38	14	CDS
rno-miR-146a-5p	XM_008766937	Pkhd1	TGAGAACTGAATTCCATGGGTT#AGCCCTAAAGTGGAAAGAGATGAAGTTCTCAT#((((((((..((((((((((((#)))))....))))).....))..)))))))).	5867	5899	1	-19.9	1	8.81851e-05	0.588	0	0	-6.23647	20	32	8	CDS
rno-miR-146a-5p	NM_001271280	Zfp180	TGAGAACTGAATTCCATGGGTT#GGCCCTGGAAGGGACCTGTGGGATTCGA#.......(((((((((((((((#.))))))))))))))).	601	629	1	-20.3	0	8.72185e-05	0.441	0.488957	0.227571	-17.1102	15	17	15	CDS
rno-miR-146a-5p	XM_006250596	Btbd8	TGAGAACTGAATTCCATGGGTT#AACCTGTGAGAGTCAGTTCTCT#.((((((((.((((((((((((#)))))))).)))))))))))).	6497	6519	1	-25	1	8.57714e-05	0.456	0	0	-5.03583	20	22	12	3UTR
rno-miR-146a-5p	XM_008766241	Dapk2	TGAGAACTGAATTCCATGGGTT#GGCCTGTGGGGACGGTTCTTG#.((((((((..(((((((((((#))))))))))).)))))))).	6492	6513	1	-22	1	8.5765e-05	0.471	0	0	-7.86061	19	21	11	3UTR
rno-miR-146a-5p	XM_006244201	Lars2	TGAGAACTGAATTCCATGGGTT#AGCCCGTGGGATGAGAGTG#.....(((..((((((((((((#))))))))))))...))).	1500	1519	1	-19.9	0	8.5368e-05	0.471	0	0	-15.9645	15	19	12	CDS
rno-miR-146a-5p	XM_008766727	Lars2	TGAGAACTGAATTCCATGGGTT#AGCCCGTGGGATGAGAGTG#.....(((..((((((((((((#))))))))))))...))).	1347	1366	1	-19.9	0	8.5368e-05	0.471	0	0	-15.9645	15	19	12	CDS
rno-miR-146a-5p	XM_006242639	Fbxl12	TGAGAACTGAATTCCATGGGTT#GGGTGAAGGGGGTTCAGGGCTCT#.(((..(((((((((.......#.)))))))))..))).	1689	1712	1	-19.1	0	8.47599e-05	0.456	0	0	-10.0464	12	16	9	3UTR
rno-miR-146a-5p	NM_019226	Dync1h1	TGAGAACTGAATTCCATGGGTT#CGTGGAGTTGCAGTTCTG#..((((((((((((((((....#))))))))).))))))).	14024	14042	1	-21.8	1	8.44874e-05	0.515	1.37555	0.980462	-4.957	16	18	9	CDS
rno-miR-146a-5p	NM_017332	Fasn	TGAGAACTGAATTCCATGGGTT#AACCCTAATGCCTTGTTCCCACCTGTGGAATTCCCGGTTCC#...((((((((((((((((((.#.)))))))))))))..))))).	2514	2555	1	-23.1	0	8.09564e-05	0.412	1.28381	0.982309	-6.51454	18	22	13	CDS
rno-miR-146a-5p	NM_001038596	Dnaja3	TGAGAACTGAATTCCATGGGTT#GACCCCGAGGAGCTATTCAGGAAGATCTTTGGAGAGTTCTCAT#((((((((...(((((.(((((#.))))).))))))))))))).	540	583	1	-18.9	1	8.07844e-05	0.559	2.10949	1.68358	-9.06125	18	21	13	CDS
rno-miR-146a-5p	XM_017592333	LOC686641	TGAGAACTGAATTCCATGGGTT#GCCACTGTGAAGACTGAATTTCTTCTCCTGGGATTCAGTGATCAC#(((..(((((((((((.(((..#.))))))))))))))..))).	36	81	1	-22.3	0	7.85787e-05	0.559	0	0	-11.0886	17	21	14	CDS
rno-miR-146a-5p	XM_008767902	Derl2	TGAGAACTGAATTCCATGGGTT#GCCCTGGGTGCTCATGGGGTTCTCC#.(((((((.....((((((((.#.))))))))))))))).	527	552	1	-19	1	7.81374e-05	0.426	0	0	-13.5529	15	17	15	CDS
rno-miR-146a-5p	XM_039087317	Derl2	TGAGAACTGAATTCCATGGGTT#GCCCTGGGTGCTCATGGGGTTCTCC#.(((((((.....((((((((.#.))))))))))))))).	504	529	1	-19	1	7.81374e-05	0.426	0	0	-13.5529	15	17	15	CDS
rno-miR-146a-5p	XM_039108923	Dennd5b	TGAGAACTGAATTCCATGGGTT#ACCCGGGAAGATGGTTCTCG#.(((((((...((((.(((((.#)))))))))...))))))).	1058	1078	1	-21.8	1	7.70518e-05	0.559	0	0	-9.15004	16	20	9	CDS
rno-miR-146a-5p	XM_039108924	Dennd5b	TGAGAACTGAATTCCATGGGTT#ACCCGGGAAGATGGTTCTCG#.(((((((...((((.(((((.#)))))))))...))))))).	991	1011	1	-21.8	1	7.70518e-05	0.559	0	0	-9.15004	16	20	9	CDS
rno-miR-146a-5p	XM_039108925	Dennd5b	TGAGAACTGAATTCCATGGGTT#ACCCGGGAAGATGGTTCTCG#.(((((((...((((.(((((.#)))))))))...))))))).	1081	1101	1	-21.8	1	7.70518e-05	0.559	0	0	-9.15004	16	20	9	CDS
rno-miR-146a-5p	NM_017250	Htr2b	TGAGAACTGAATTCCATGGGTT#GCCTAGTAAGTGCAAGGCCCTGGGTTCGGTTCTCAG#(((((((((((.((((.(((((#.)))))))))))))))))))).	1931	1967	1	-27.3	1	7.52903e-05	0.632	0.58085	0.285925	-7.28438	20	22	20	3UTR
rno-miR-146a-5p	NM_012717	Calcrl	TGAGAACTGAATTCCATGGGTT#CCCATGGGCTTCTCAGTTGCTG#..((((((((..((((((((..#))))))))....)))))).)).	2643	2665	1	-19.7	1	7.33541e-05	0.529	0	0	-11.1286	16	22	8	3UTR
rno-miR-146a-5p	XM_006234439	Calcrl	TGAGAACTGAATTCCATGGGTT#CCCATGGGCTTCTCAGTTGCTG#..((((((((..((((((((..#))))))))....)))))).)).	2463	2485	1	-19.7	1	7.33541e-05	0.529	0	0	-11.1286	16	22	8	3UTR
rno-miR-146a-5p	XM_039085715	Lcor	TGAGAACTGAATTCCATGGGTT#GATGAGTGGAGTTCAGTGGGACTCTCGG#(((((((((((((((((..(((#)))..)))))))))))).....))))).	7145	7173	1	-21.2	1	7.32748e-05	0.471	0	0	-3.93757	20	28	12	3UTR
rno-miR-146a-5p	XM_039085725	Lcor	TGAGAACTGAATTCCATGGGTT#GATGAGTGGAGTTCAGTGGGACTCTCGG#(((((((((((((((((..(((#)))..)))))))))))).....))))).	6905	6933	1	-21.2	1	7.32748e-05	0.471	0	0	-3.93757	20	28	12	3UTR
rno-miR-146a-5p	NM_021764	Rbck1	TGAGAACTGAATTCCATGGGTT#AGCCCATGGGGTCCAGCTCTGCAT#(((((.(((.((((((((((((#)))))))))))).))).))).)).	2271	2295	1	-24.2	0	7.25409e-05	0.5	-0.152509	-0.208311	-7.08104	20	24	12	3UTR
rno-miR-146a-5p	XM_006252734	Ercc6	TGAGAACTGAATTCCATGGGTT#CCCAGGAAAGCTAGGCACGTTGCCTGTGTTCATGGAGCAGTTCTCT#.((((((((..(((((((((..#.))))))))))))))))).	2193	2239	1	-21.7	1	7.17358e-05	0.441	0	0	-7.86061	17	19	17	CDS
rno-miR-146a-5p	NM_001013957	Pqbp1	TGAGAACTGAATTCCATGGGTT#GACCCATGGCTTCAGA#......(((((..(((((((((#))))))))).))))).	993	1009	1	-19.7	0	7.11133e-05	0.471	0	0	-20.2025	14	16	9	3UTR
rno-miR-146a-5p	XM_006256708	Pqbp1	TGAGAACTGAATTCCATGGGTT#GACCCATGGCTTCAGA#......(((((..(((((((((#))))))))).))))).	995	1011	1	-19.7	0	7.11133e-05	0.471	0	0	-20.2025	14	16	9	3UTR
rno-miR-146a-5p	NM_153296	Aurka	TGAGAACTGAATTCCATGGGTT#GGCCCTCCTGTTTTAAGCCTTCTGAAGCCCATGTGGGGTTCAGATCCTCAA#(((((.((((((((((((((((#.))))))..)))))))))).)).))).	1602	1653	1	-24.3	0	7.08214e-05	0.471	1.70076	1.65863	-5.83853	21	27	10	3UTR
rno-miR-146a-5p	XM_006235675	Aurka	TGAGAACTGAATTCCATGGGTT#GGCCCTCCTGTTTTAAGCCTTCTGAAGCCCATGTGGGGTTCAGATCCTCAA#(((((.((((((((((((((((#.))))))..)))))))))).)).))).	1803	1854	1	-24.3	0	7.08214e-05	0.471	0	0	-5.83853	21	27	10	3UTR
rno-miR-146a-5p	XM_006235676	Aurka	TGAGAACTGAATTCCATGGGTT#GGCCCTCCTGTTTTAAGCCTTCTGAAGCCCATGTGGGGTTCAGATCCTCAA#(((((.((((((((((((((((#.))))))..)))))))))).)).))).	1881	1932	1	-24.3	0	7.08214e-05	0.471	0	0	-5.83853	21	27	10	3UTR
rno-miR-146a-5p	XM_006257320	Arf3	TGAGAACTGAATTCCATGGGTT#ACCCATGGAGCAGGCCTG#..((..(((..((((((((((.#)))))))))))))..)).	1841	1859	1	-20.4	0	7.00995e-05	0.426	0	0	-15.0443	15	18	13	3UTR
rno-miR-146a-5p	NM_001025276	RGD1305807	TGAGAACTGAATTCCATGGGTT#CCCATGGGCAGTTTC#...((((((...((((((((..#)))))))))))))).	514	529	1	-18.3	0	6.97168e-05	0.515	1.15156	0.769044	-13.9286	14	15	14	CDS
rno-miR-146a-5p	NM_019346	Slc14a1	TGAGAACTGAATTCCATGGGTT#AGCCTGTGGTGCTCCAGTTCA#...((((((....(((((((((#))))))))).....)))))).	263	284	1	-19.2	0	6.80869e-05	0.485	1.81919	0.802853	-15.2178	15	21	9	CDS
rno-miR-146a-5p	NM_001108447	Nfatc3	TGAGAACTGAATTCCATGGGTT#TCTAGGAGTTGGTTCTCAG#((((((((.((((((.((((..#)))))))))))))))))).	597	616	1	-19.2	1	6.80419e-05	0.5	2.56846	2.04507	-5.22701	18	19	18	CDS
rno-miR-146a-5p	XM_006238793	Mycl	TGAGAACTGAATTCCATGGGTT#GACTCATGGGAATGCTGTCCTTCTCTGGCGCCTTTGGCTTCTCAG#((((((((((((((((((((((#))))))))))).....................))))).)))))).	1578	1623	1	-19.8	1	6.74596e-05	0.441	0	0	-3.93757	22	45	11	3UTR
rno-miR-146a-5p	XM_006247784	Cyth1	TGAGAACTGAATTCCATGGGTT#GGGATCCAGTTCTTAA#(((((((((.(((((.......#))))).))))))))).	378	394	1	-18	1	6.74323e-05	0.588	0	0	-5.41313	14	16	9	CDS
rno-miR-146a-5p	XM_039089907	Evi5l	TGAGAACTGAATTCCATGGGTT#CCCTTGGGGAGTTCTCAG#((((((((...(((((.(((..#))).))))))))))))).	3452	3470	1	-20	1	6.54445e-05	0.441	0	0	-9.06125	16	18	13	3UTR
rno-miR-146a-5p	XM_039089908	Evi5l	TGAGAACTGAATTCCATGGGTT#CCCTTGGGGAGTTCTCAG#((((((((...(((((.(((..#))).))))))))))))).	3419	3437	1	-20	1	6.54445e-05	0.441	0	0	-9.06125	16	18	13	3UTR
rno-miR-146a-5p	XM_039089909	Evi5l	TGAGAACTGAATTCCATGGGTT#CCCTTGGGGAGTTCTCAG#((((((((...(((((.(((..#))).))))))))))))).	3365	3383	1	-20	1	6.54445e-05	0.441	0	0	-9.06125	16	18	13	3UTR
rno-miR-146a-5p	NM_001025670	Gpat3	TGAGAACTGAATTCCATGGGTT#ACCCATGGAAAAAGGGCTCT#.(((..((...((((((((((.#))))))))))..))..))).	531	551	1	-23	0	6.50666e-05	0.485	2.14946	1.91258	-14.937	15	20	10	CDS
rno-miR-146a-5p	NM_001107877	Adamts9	TGAGAACTGAATTCCATGGGTT#GGCCCGTGGAGCTCGTGTTCTG#..((((((((.(((((((((((#))))))))))).))).))))).	4564	4586	1	-24.7	1	6.45997e-05	0.441	2.01701	1.80823	-7.78178	19	22	11	CDS
rno-miR-146a-5p	NM_001107762	Nusap1	TGAGAACTGAATTCCATGGGTT#AGCGCAAGACCATCCATGGAATTCCTACCTCC#.(((....(((((((((((((.#.)))))))))))))....))).	543	575	1	-21.5	0	6.40782e-05	0.529	0.0942964	0.23055	-13.6706	16	22	13	CDS
rno-miR-146a-5p	XM_006234768	Nusap1	TGAGAACTGAATTCCATGGGTT#AGCGCAAGACCATCCATGGAATTCCTACCTCC#.(((....(((((((((((((.#.)))))))))))))....))).	401	433	1	-21.5	0	6.40782e-05	0.529	0	0	-13.6706	16	22	13	CDS
rno-miR-146a-5p	XM_008762102	Nusap1	TGAGAACTGAATTCCATGGGTT#AGCGCAAGACCATCCATGGAATTCCTACCTCC#.(((....(((((((((((((.#.)))))))))))))....))).	546	578	1	-21.5	0	6.40782e-05	0.529	0	0	-13.6706	16	22	13	CDS
rno-miR-146a-5p	XM_001059757	Ptpn3	TGAGAACTGAATTCCATGGGTT#ATGAGAAACTGGAATTTGGTTCTCT#.(((((((((((((((......#.))))))))))))))).	4781	4806	1	-21.2	1	6.4004e-05	0.515	0	0	-3.79332	15	17	15	3UTR
rno-miR-146a-5p	XM_233485	Rlf	TGAGAACTGAATTCCATGGGTT#AGCCTATGGGATTTGAGTCTTC#.(((.(((((((((((((((((#)))))))))))))).)))))).	5341	5363	1	-21	0	6.34399e-05	0.618	0	0	-7.91236	20	22	14	CDS
rno-miR-146a-5p	NM_031322	Lrp4	TGAGAACTGAATTCCATGGGTT#AGCCCTGGGATCTCGTCCATTGCTGGCAGTGGACGTTCTCAC#((((((((((((((((.(((((#))))))))))).)))...................))))))).	6291	6333	1	-19.6	1	6.18906e-05	0.441	0.765989	0.156069	-3.93757	21	42	11	3UTR
rno-miR-146a-5p	XM_039088772	Krtap11-1	TGAGAACTGAATTCCATGGGTT#AGCCGATGGAAGGCATTCTCC#.(((((.((..((((((.((((#)))).))))))..))))))).	1284	1305	1	-21.5	0	6.15337e-05	0.515	0	0	-9.40429	17	21	7	5UTR
rno-miR-146a-5p	XM_220775	Slfn5	TGAGAACTGAATTCCATGGGTT#GCCCGTGGAGACTCAGG#......((((.((((((((((.#))))))))))..)))).	3670	3687	1	-20.3	0	6.11712e-05	0.529	0	0	-18.3913	14	17	10	3UTR
rno-miR-146a-5p	NM_001134599	Flna	TGAGAACTGAATTCCATGGGTT#TGGATGTTCAGTTCTCAG#((((((((((((((((......#)))).)))))))))))).	2888	2906	1	-21.9	1	6.04407e-05	0.485	1.85883	1.64378	-3.93757	16	18	12	CDS
rno-miR-146a-5p	XM_039099535	Flna	TGAGAACTGAATTCCATGGGTT#TGGATGTTCAGTTCTCAG#((((((((((((((((......#)))).)))))))))))).	2839	2857	1	-21.9	1	6.04407e-05	0.485	0	0	-3.93757	16	18	12	CDS
rno-miR-146a-5p	XM_006249856	Kif21b	TGAGAACTGAATTCCATGGGTT#ACCCAGGTAGTTCTCAG#(((((((((....((.(((((.#)))))))))))))))).	5605	5622	1	-19.4	1	5.92403e-05	0.426	0	0	-12.8738	16	17	16	3UTR
rno-miR-146a-5p	XM_006249857	Kif21b	TGAGAACTGAATTCCATGGGTT#ACCCAGGTAGTTCTCAG#(((((((((....((.(((((.#)))))))))))))))).	5602	5619	1	-19.4	1	5.92403e-05	0.426	0	0	-12.8738	16	17	16	3UTR
rno-miR-146a-5p	XM_006249858	Kif21b	TGAGAACTGAATTCCATGGGTT#ACCCAGGTAGTTCTCAG#(((((((((....((.(((((.#)))))))))))))))).	5563	5580	1	-19.4	1	5.92403e-05	0.426	0	0	-12.8738	16	17	16	3UTR
rno-miR-146a-5p	NM_053548	Opn1mw	TGAGAACTGAATTCCATGGGTT#TCCAGACGTGTTCAGCGGTACCTCGTATCCTGGGGTTCAGTCTTAT#((((.(((((((((((.((((.#.))))))))))))))))))).	596	642	1	-22	0	5.91306e-05	0.485	1.53689	1.50875	-8.05661	19	21	19	CDS
rno-miR-146a-5p	XM_216317	Sbspon	TGAGAACTGAATTCCATGGGTT#ACTCTTGCAGAGGACTGGAGTTTGGTTCTCAG#((((((((((((((((......#.)))))))))))))))).	2517	2549	1	-22.4	1	5.90208e-05	0.456	0	0	-3.93757	16	18	16	3UTR
rno-miR-146a-5p	NM_001099471	Vom2r26	TGAGAACTGAATTCCATGGGTT#GGAGCCAGTTCTCAC#(((((((((..((((.......#)))).))))))))).	1278	1293	1	-17.2	1	5.88517e-05	0.603	0.305957	0.245944	-8.2379	13	15	9	CDS
rno-miR-146a-5p	XM_039087511	Dnah17	TGAGAACTGAATTCCATGGGTT#CCCATGTGGATTGAGTCTCTCAA#((((((((.(((((((((((..#)))))).))))).))).))))).	6794	6817	1	-24.1	1	5.85061e-05	0.515	0	0	-4.99396	19	23	6	CDS
rno-miR-146a-5p	NM_001000533	Olr1581	TGAGAACTGAATTCCATGGGTT#AGCCTCTTCAGTCTGTGCCATGGGGTTCTTGCTCTCAC#(((((.(.(((((((((((...#.)))))))))))..).))))).	431	469	1	-22.2	0	5.82002e-05	0.441	0.566633	0.514702	-8.15217	17	22	11	CDS
rno-miR-146a-5p	XM_006241920	LOC102555083	TGAGAACTGAATTCCATGGGTT#CCCGTGGAGTTGAAGTTCCAG#((.(((((.(((((((((((..#)))))))))))..))))))).	164	185	1	-23.5	0	5.79986e-05	0.471	0	0	-6.5515	18	21	11	5UTR
rno-miR-146a-5p	XM_003749311	Fbxw7	TGAGAACTGAATTCCATGGGTT#GTGGATTTAGTTCTTG#.((((((((((.(((((.....#))))))))))))))).	2837	2853	1	-17.1	1	5.70252e-05	0.544	0	0	-7.14013	15	16	15	3UTR
rno-miR-146a-5p	XM_006232555	Fbxw7	TGAGAACTGAATTCCATGGGTT#GTGGATTTAGTTCTTG#.((((((((((.(((((.....#))))))))))))))).	3234	3250	1	-17.1	1	5.70252e-05	0.544	0	0	-7.14013	15	16	15	3UTR
rno-miR-146a-5p	XM_039103738	Fbxw7	TGAGAACTGAATTCCATGGGTT#GTGGATTTAGTTCTTG#.((((((((((.(((((.....#))))))))))))))).	2921	2937	1	-17.1	1	5.70252e-05	0.544	0	0	-7.14013	15	16	15	3UTR
rno-miR-146a-5p	XM_039103739	Fbxw7	TGAGAACTGAATTCCATGGGTT#GTGGATTTAGTTCTTG#.((((((((((.(((((.....#))))))))))))))).	3500	3516	1	-17.1	1	5.70252e-05	0.544	0	0	-7.14013	15	16	15	3UTR
rno-miR-146a-5p	XM_006242558	Slc36a4	TGAGAACTGAATTCCATGGGTT#AGCCCGTGGAGTTGTCTTCAG#((((.((..(((((((((((((#))))))))))))))).)))).	760	781	1	-21	0	5.69625e-05	0.353	0	0	-11.4266	19	21	15	CDS
rno-miR-146a-5p	NM_145682	Filip1	TGAGAACTGAATTCCATGGGTT#AACCCATGGAACGGTCCTCGG#((((.((((..(((((((((((#))))))))))))))).)))).	2604	2625	1	-24.4	0	5.26543e-05	0.412	2.36375	1.58635	-12.1239	19	21	15	CDS
rno-miR-146a-5p	XM_039078354	Rap1b	TGAGAACTGAATTCCATGGGTT#AACCTGTGGAGACAGTGATCT#.((..((((..(((((((((((#))))))))))).))))..)).	1333	1354	1	-19.9	0	5.17364e-05	0.721	0	0	-15.0117	17	21	11	3UTR
rno-miR-146a-5p	NM_001100966	Scap	TGAGAACTGAATTCCATGGGTT#GACCCGTGGAATTCTCCACGCCTGTGAAGGGTTACTCG#.(((((((((((((((((((((#))))))))))))))...............)))).))).	440	478	1	-25.3	1	5.15012e-05	0.382	1.63252	1.20108	-3.79332	21	38	14	CDS
rno-miR-146a-5p	XM_006238010	Npr2	TGAGAACTGAATTCCATGGGTT#GCCCGTGGACCTGCGGTTTGTCAG#(((((((((...(((((((((.#)))))))))....)))))).))).	215	239	1	-22.1	1	5.06098e-05	0.324	0	0	-11.3517	18	24	9	CDS
rno-miR-146a-5p	NM_031548	Scnn1a	TGAGAACTGAATTCCATGGGTT#AGCCCAAGGGAGTTGAGTTCTG#..((((((.((((((.((((((#))))))..)))))).)))))).	1761	1783	1	-25	1	4.99642e-05	0.471	0.0705257	1.38791	-6.24644	18	22	6	CDS
rno-miR-146a-5p	NM_001108938	Egflam	TGAGAACTGAATTCCATGGGTT#ACTCTGGAATTCAGGGCA#...(..((((((((((.((((.#))))))))))))))..).	1423	1441	1	-20.3	0	4.99201e-05	0.544	0.940917	1.78568	-12.5345	15	18	14	CDS
rno-miR-146a-5p	XM_039102639	Trim2	TGAGAACTGAATTCCATGGGTT#GCCGAGGTCTTGCACTAGAAACTGGAATGGAGTTCTCAA#((((((((..((((((......#.))))))..)))))))).	3342	3381	1	-19	1	4.97686e-05	0.5	0	0	-6.23647	14	18	8	3UTR
rno-miR-146a-5p	XM_039102642	Trim2	TGAGAACTGAATTCCATGGGTT#GCCGAGGTCTTGCACTAGAAACTGGAATGGAGTTCTCAA#((((((((..((((((......#.))))))..)))))))).	2435	2474	1	-19	1	4.97686e-05	0.5	0	0	-6.23647	14	18	8	3UTR
rno-miR-146a-5p	XM_039102647	Trim2	TGAGAACTGAATTCCATGGGTT#GCCGAGGTCTTGCACTAGAAACTGGAATGGAGTTCTCAA#((((((((..((((((......#.))))))..)))))))).	2504	2543	1	-19	1	4.97686e-05	0.5	0	0	-6.23647	14	18	8	3UTR
rno-miR-146a-5p	NM_177425	Csrp2	TGAGAACTGAATTCCATGGGTT#GGCCCAAGGGATTCGGC#......(((((((((.((((((#)))))).))))))))).	575	592	1	-21	0	4.82424e-05	0.426	2.32895	2.04719	-15.7996	15	17	9	CDS
rno-miR-146a-5p	NM_001107094	Hoxd10	TGAGAACTGAATTCCATGGGTT#AACCTGTGGACTGCTCCCGTCTCT#.((((...((..((((((((((#))))))))))....))...)))).	246	270	1	-16.8	0	4.72833e-05	0.515	3.06272	2.31302	-15.7232	16	24	10	CDS
rno-miR-146a-5p	XM_006238531	Rab3b	TGAGAACTGAATTCCATGGGTT#GACCATCACCACAGCCTACTACCGCGGGGCCATGGGCTTCATTCTCAT#((((((.((((.(((((((.((#.)).))))))).)))))))))).	417	465	1	-21.9	0	4.4588e-05	0.456	0	0	-8.82806	19	23	10	CDS
rno-miR-146a-5p	XM_008764107	Ermap	TGAGAACTGAATTCCATGGGTT#CCCAGGGCTCAGTTCTGAA#(.((((((((..(((.((((..#))))))).)))))))).).	1908	1927	1	-19.8	1	4.4522e-05	0.618	0	0	-11.5059	16	19	8	3UTR
rno-miR-146a-5p	XM_039111198	Ermap	TGAGAACTGAATTCCATGGGTT#CCCAGGGCTCAGTTCTGAA#(.((((((((..(((.((((..#))))))).)))))))).).	2277	2296	1	-19.8	1	4.4522e-05	0.618	0	0	-11.5059	16	19	8	3UTR
rno-miR-146a-5p	XM_006243206	Uaca	TGAGAACTGAATTCCATGGGTT#CCCAGGAGACCTGAGTTTAGTTACTCAG#((((((((((((((...(((((#.))))))))))))))).)))).	151	179	1	-19.2	1	4.42381e-05	0.544	0	0	-4.90607	19	22	15	5UTR
rno-miR-146a-5p	XM_008760445	Hpse2	TGAGAACTGAATTCCATGGGTT#CCCATGGGGAGTCAGTACTCT#.(((.(((((.(((((((((..#)))))))))..))))).))).	10322	10343	1	-23.3	0	4.37509e-05	0.544	0	0	-10.7371	17	21	9	5UTR
rno-miR-146a-5p	XM_039093858	Aldh1a1	TGAGAACTGAATTCCATGGGTT#AGCCCATGGAATGCTGTG#.....((...((((((((((((#))))))))))))...)).	134	152	1	-19.8	0	4.35888e-05	0.485	0	0	-18.2781	14	18	12	5UTR
rno-miR-146a-5p	NM_001024247	Lactb2	TGAGAACTGAATTCCATGGGTT#AACCTTGAGGAATCATTCTCAG#((((((.((.(((((..(((((#)))))...))))))))))))).	739	761	1	-16.8	0	4.33761e-05	0.603	1.30813	1.0285	-6.95682	18	22	13	CDS
rno-miR-146a-5p	NM_001169137	Epha5	TGAGAACTGAATTCCATGGGTT#ACCCATTGAAGTGGGTTTTCAG#((((((((.(.(((.((((((.#)))))).))).).)))))))).	7014	7036	1	-20.3	1	4.3298e-05	0.662	0.0799658	0.298571	-8.55419	18	22	8	3UTR
rno-miR-146a-5p	XM_342676	Arhgef5	TGAGAACTGAATTCCATGGGTT#GGCCCTGGAGTTCAGTGTCTCC#.(((((((((((((((.(((((#)))))))))))))))).)))).	4315	4337	1	-27.6	1	4.26377e-05	0.397	0	0	-3.79332	20	22	16	CDS
rno-miR-146a-5p	NM_001100477	Ces2e	TGAGAACTGAATTCCATGGGTT#AGCCTGTGGATTCAGA#......(((((.((((((((((#))))))))))))))).	838	854	1	-18.7	0	4.22635e-05	0.471	0.185688	0.399919	-18.9134	15	16	15	CDS
rno-miR-146a-5p	XM_006238350	Ttc39b	TGAGAACTGAATTCCATGGGTT#ACCTATGTCAGGCAGTTCTCAA#(((((((((..(..(((((((.#)))))))..)..))))))))).	4281	4303	1	-22.5	1	4.2098e-05	0.559	0	0	-10.1508	17	22	9	3UTR
rno-miR-146a-5p	XM_008763774	Ttc39b	TGAGAACTGAATTCCATGGGTT#ACCTATGTCAGGCAGTTCTCAA#(((((((((..(..(((((((.#)))))))..)..))))))))).	4326	4348	1	-22.5	1	4.2098e-05	0.559	0	0	-10.1508	17	22	9	3UTR
rno-miR-146a-5p	XM_039103595	Zfp704	TGAGAACTGAATTCCATGGGTT#ATCCTGTAGCACTGCATTCAGCTGTGGAAATCAGTTCCAC#((.(((((((.((((((((.(.#.).)))))))).))))))))).	7868	7908	1	-21.1	0	4.192e-05	0.515	0	0	-8.31989	18	22	9	3UTR
rno-miR-146a-5p	NM_001000557	Olr1693	TGAGAACTGAATTCCATGGGTT#CTCATGGGGTTCTCAG#((((((((.....(((((((..#))))))))))))))).	30	46	1	-18.7	1	4.16082e-05	0.559	0.240413	0.579288	-13.6972	15	16	15	CDS
rno-miR-146a-5p	XM_237056	Tmem131	TGAGAACTGAATTCCATGGGTT#AGCCCGTGGGATTCTGAGGGCGTGTCGAGGAGTCGGAGCTCAC#((((..((((((((((((((((#))))))))))))))....................))..)))).	23	66	1	-22.9	0	4.07916e-05	0.338	0	0	-9.95757	20	43	14	5UTR
rno-miR-146a-5p	NM_001001511	Gcnt2	TGAGAACTGAATTCCATGGGTT#GCTCCTGCCCGCAGGGATTCGGTTCC#...((((((((((((.(((((.#.)))))..)))))))))))).	203	229	1	-23.9	0	4.04682e-05	0.353	1.07348	0.16218	-6.74759	17	21	12	5UTR
rno-miR-146a-5p	NM_021661	Rgs19	TGAGAACTGAATTCCATGGGTT#GCCCAGGAGATGTTCTCAT#(((((((....((((.(((((.#)))))))))..))))))).	1101	1120	1	-20.2	1	3.96633e-05	0.485	0.420585	0.703502	-11.6079	16	19	9	3UTR
rno-miR-146a-5p	XM_039090018	LOC120095902	TGAGAACTGAATTCCATGGGTT#AGCCCATGGATTCAGG#......(((((.((((((((((#))))))))))))))).	7212	7228	1	-22.5	0	3.91048e-05	0.559	0	0	-18.9134	15	16	15	3UTR
rno-miR-146a-5p	NM_023024	Dync2h1	TGAGAACTGAATTCCATGGGTT#GACCCAGGGAATTCAGAATCAG#(((...(((((((((.((((((#)))))).)))))))))..))).	5139	5161	1	-24.2	0	3.85105e-05	0.574	1.72677	1.74842	-13.2226	18	22	9	CDS
rno-miR-146a-5p	XM_008772670	Nup133	TGAGAACTGAATTCCATGGGTT#ACCCATGGGCAGCTTCTCT#.((((((((...(((((((((.#)))))))))))).))))).	2665	2684	1	-22.3	1	3.83886e-05	0.456	0	0	-11.2074	17	19	12	CDS
rno-miR-146a-5p	NM_019217	Map1b	TGAGAACTGAATTCCATGGGTT#CGGTGGAAGGGGTTCTCGG#((((((((...((((((.(...#).))))))..)))))))).	8810	8829	1	-20.3	1	3.80688e-05	0.485	0.405647	0.598572	-9.06125	15	19	8	3UTR
rno-miR-146a-5p	NM_001007264	Ugt2b37	TGAGAACTGAATTCCATGGGTT#GGCCGATGGAATTCAGTC#.....((((((((((((.((((#)))).)))))))))))).	127	145	1	-23.9	0	3.79296e-05	0.588	0.440606	0.609922	-13.6656	16	18	12	CDS
rno-miR-146a-5p	NM_031590	Ccn5	TGAGAACTGAATTCCATGGGTT#AGCAGGTGACCAGCTCCAGTTCTCTGGTTCAGCCTGGGATTCTGGGTTCTCC#.((((((((((((((..(((((#.))))))))))))..))))))).	1214	1266	1	-21	1	3.78708e-05	0.485	0.127191	-0.0776668	-4.02637	19	23	12	3UTR
rno-miR-146a-5p	NM_001007688	Fam210a	TGAGAACTGAATTCCATGGGTT#AGCCCCTATGGGGTCGATGTTCTCAG#((((((((..((((((((((..#.))))))))))..).))))))).	7299	7325	1	-23.1	1	3.7667e-05	0.544	0.283252	-0.186077	-6.23647	18	23	10	3UTR
rno-miR-146a-5p	NM_001099472	Vom2r28	TGAGAACTGAATTCCATGGGTT#GGAGCCAGTTCTCAC#(((((((((..((((.......#)))).))))))))).	1278	1293	1	-17.2	1	3.73941e-05	0.588	0	0	-8.2379	13	15	9	CDS
rno-miR-146a-5p	XM_039085529	Abr	TGAGAACTGAATTCCATGGGTT#GGAAGCTAGTTCTCT#.((((((((..((((.......#))))..)))))))).	267	282	1	-16.7	1	3.73583e-05	0.456	0	0	-8.09365	12	15	8	CDS
rno-miR-146a-5p	NM_001100730	Nipsnap1	TGAGAACTGAATTCCATGGGTT#AACCAGTTGCTTCTGGAATTCAGCTTCTGGA#(.((((((((((((((.((((.#.)))).)))))))))).)))).).	505	536	1	-21.2	1	3.69671e-05	0.426	1.97253	1.7772	-5.10125	19	24	10	CDS
rno-miR-146a-5p	XM_006239833	Otof	TGAGAACTGAATTCCATGGGTT#GACCCATGGATTACCAGGTCA#...((.(((...((((((((((#))))))))))....))).)).	937	958	1	-20.6	0	3.63795e-05	0.426	0	0	-15.8296	15	21	10	CDS
rno-miR-146a-5p	XM_039113009	Otof	TGAGAACTGAATTCCATGGGTT#GACCCATGGATTACCAGGTCA#...((.(((...((((((((((#))))))))))....))).)).	748	769	1	-20.6	0	3.63795e-05	0.426	0	0	-15.8296	15	21	10	CDS
rno-miR-146a-5p	XM_006235215	Apmap	TGAGAACTGAATTCCATGGGTT#GACCAGTTGCAGTTCCCTAATGGAGTTCAGCTGTCTCC#.((((.((((((((((((((..#.)))..)))))))))))...)))).	844	882	1	-23	0	3.63735e-05	0.471	0	0	-5.69428	18	25	11	CDS
rno-miR-146a-5p	XM_006248472	Smco1	TGAGAACTGAATTCCATGGGTT#AGCCCAAGACGAGATATGGACAGCAGCTCTGGCCCTGGGGTTCACCTCAA#((((...(((((((((.(((((#.)))))))))))))).)))).	288	338	1	-21.6	0	3.52232e-05	0.544	0	0	-11.5013	18	21	14	CDS
rno-miR-146a-5p	XM_006238108	Tdrd7	TGAGAACTGAATTCCATGGGTT#AACCCAGAGGAGGGTTCTCAG#((((((((...((((.((((((#))))))..)))))))))))).	49	70	1	-21.9	1	3.50263e-05	0.382	0	0	-9.29429	18	21	12	CDS
rno-miR-146a-5p	NM_001106490	Mybpc3	TGAGAACTGAATTCCATGGGTT#CCATGGAGTGGTTCA#...(((((..(((((((((...#)))))))))))))).	3355	3370	1	-18.8	0	3.48281e-05	0.529	2.2738	1.67984	-8.81344	14	15	14	CDS
rno-miR-146a-5p	NM_012877	Scn2b	TGAGAACTGAATTCCATGGGTT#AACCCGAGGGGTTCAGCTCAG#((((..(((((((((.((((((#)))))).))))))))))))).	3571	3592	1	-24.2	0	3.4123e-05	0.529	0	0	-10.1906	19	21	13	3UTR
rno-miR-146a-5p	XM_001061329	Rbms3	TGAGAACTGAATTCCATGGGTT#TGGGGTTCGGTTCCAC#((.(((((((((((((......#))))))))))))))).	87	103	1	-18.7	0	3.31664e-05	0.324	0	0	-5.49511	15	16	15	5UTR
rno-miR-146a-5p	XM_006244038	Rbms3	TGAGAACTGAATTCCATGGGTT#TGGGGTTCGGTTCCAC#((.(((((((((((((......#))))))))))))))).	87	103	1	-18.7	0	3.31664e-05	0.324	0	0	-5.49511	15	16	15	5UTR
rno-miR-146a-5p	XM_039082843	Rbms3	TGAGAACTGAATTCCATGGGTT#TGGGGTTCGGTTCCAC#((.(((((((((((((......#))))))))))))))).	87	103	1	-18.7	0	3.31664e-05	0.324	0	0	-5.49511	15	16	15	5UTR
rno-miR-146a-5p	NM_001047101	Adamts7	TGAGAACTGAATTCCATGGGTT#ACCCACCCCTGCACACAGTGGGTGGTAGGGCCCTGGGGTCAGTGCTCAG#((((.((((.((((((.(((((#.))))))))))))))).)))).	5064	5113	1	-23.2	0	3.26043e-05	0.324	1.92205	1.43063	-9.29912	19	22	15	CDS
rno-miR-146a-5p	NM_001106294	Ndufab1	TGAGAACTGAATTCCATGGGTT#AGCTCAGTGGTAGAGCGCCCTGGGTTCGGTCCTCAG#((((.((((((.((((.((((.#.)))))))))))))).)))).	845	881	1	-22.6	0	3.24493e-05	0.588	-0.11105	0.029896	-11.4034	18	21	14	3UTR
rno-miR-146a-5p	XM_006238260	Rgs3	TGAGAACTGAATTCCATGGGTT#AGCCCATGGAGGCAGCTCTGGT#(.(((.(((..(((((((((((#))))))))))).))).))).).	2553	2575	1	-23.1	0	3.17608e-05	0.397	0	0	-11.0695	18	22	11	CDS
rno-miR-146a-5p	XM_017593595	Rgs3	TGAGAACTGAATTCCATGGGTT#AGCCCATGGAGGCAGCTCTGGT#(.(((.(((..(((((((((((#))))))))))).))).))).).	2777	2799	1	-23.1	0	3.17608e-05	0.397	0	0	-11.0695	18	22	11	CDS
rno-miR-146a-5p	XM_039090618	Adora1	TGAGAACTGAATTCCATGGGTT#GCCCTGAGTTCAGTTCC#...(((((((((((...((((.#)))).))))))))))).	4778	4795	1	-20.7	0	2.98201e-05	0.441	0	0	-7.48304	15	17	11	3UTR
rno-miR-146a-5p	XM_006234532	Spi1	TGAGAACTGAATTCCATGGGTT#GGAGTCAGTTCTCT#.((((((((.(((((.......#))))))))))))).	3573	3587	1	-19.3	1	2.95444e-05	0.5	0	0	-5.26888	13	14	13	3UTR
rno-miR-146a-5p	NM_001108068	Sbno2	TGAGAACTGAATTCCATGGGTT#CCTGTGGGGTCAGTTCTGGT#(.(((((((.((((((((((..#))))))))))))))))).).	1931	1951	1	-23	1	2.88265e-05	0.441	2.28722	1.48269	-6.34376	18	20	17	CDS
rno-miR-146a-5p	XM_017594814	Sbno2	TGAGAACTGAATTCCATGGGTT#CCTGTGGGGTCAGTTCTGGT#(.(((((((.((((((((((..#))))))))))))))))).).	1817	1837	1	-23	1	2.88265e-05	0.441	0	0	-6.34376	18	20	17	CDS
rno-miR-146a-5p	XM_039078982	Sbno2	TGAGAACTGAATTCCATGGGTT#CCTGTGGGGTCAGTTCTGGT#(.(((((((.((((((((((..#))))))))))))))))).).	2617	2637	1	-23	1	2.88265e-05	0.441	0	0	-6.34376	18	20	17	CDS
rno-miR-146a-5p	XM_006244005	Klhl18	TGAGAACTGAATTCCATGGGTT#GACCTGTGGCAAGGTGCTCATGGGGTTTGGTCTCC#.(((.((((((((((((((((.#.))))))))))))))))))).	2788	2823	1	-24.1	0	2.86095e-05	0.485	0	0	-7.91236	19	21	19	3UTR
rno-miR-146a-5p	XM_236647	Klhl18	TGAGAACTGAATTCCATGGGTT#GACCTGTGGCAAGGTGCTCATGGGGTTTGGTCTCC#.(((.((((((((((((((((.#.))))))))))))))))))).	2773	2808	1	-24.1	0	2.86095e-05	0.485	0	0	-7.91236	19	21	19	3UTR
rno-miR-146a-5p	NM_017064	Stat5a	TGAGAACTGAATTCCATGGGTT#CCCATGGAGCTGGTTCG#...((((((..(((((((((..#))))))))).)))))).	353	370	1	-19.7	0	2.82585e-05	0.471	2.24411	1.84463	-10.5818	15	17	9	CDS
rno-miR-146a-5p	NM_001107141	Pptc7	TGAGAACTGAATTCCATGGGTT#GGCGTTGGAGGGTGGAGAGACTATGGAGTGGACCCGTCTCAGTTCTCAG#(((((((((((((((((((...#.))))))))).........)))))))))).	528	577	1	-24.7	1	2.80336e-05	0.485	2.27608	1.85848	-3.93757	19	30	10	CDS
rno-miR-146a-5p	NM_001033707	Arfgap2	TGAGAACTGAATTCCATGGGTT#CCCGCTGGGATTCAGA#......((((((((((((((..#)))).)))))))))).	1156	1172	1	-20	0	2.79933e-05	0.485	1.686	1.60737	-15.5666	14	16	10	CDS
rno-miR-146a-5p	XM_006234530	Arfgap2	TGAGAACTGAATTCCATGGGTT#CCCGCTGGGATTCAGA#......((((((((((((((..#)))).)))))))))).	1302	1318	1	-20	0	2.79933e-05	0.485	0	0	-15.5666	14	16	10	CDS
rno-miR-146a-5p	XM_008760174	Slc29a2	TGAGAACTGAATTCCATGGGTT#GTGGAGTCAGTTCTTC#.((((((((.(((((((.....#))))))))))))))).	2398	2414	1	-19	1	2.75122e-05	0.485	0	0	-5.03583	15	16	15	CDS
rno-miR-146a-5p	NM_001191864	Cspp1	TGAGAACTGAATTCCATGGGTT#GACTCAGGAATTCAGGACTGGT#(.((..(((((((((.((((((#)))))))))))))))..)).).	1666	1688	1	-21.5	0	2.66134e-05	0.544	0.742385	0.950136	-11.3543	18	22	15	CDS
rno-miR-146a-5p	XM_001062249	She	TGAGAACTGAATTCCATGGGTT#CCCTTGGTGCAGTTCTCT#.((((((((....(((.(((..#))).)))..)))))))).	2036	2054	1	-21.3	1	2.64013e-05	0.456	0	0	-12.4965	14	18	8	3UTR
rno-miR-146a-5p	XM_008761244	She	TGAGAACTGAATTCCATGGGTT#CCCTTGGTGCAGTTCTCT#.((((((((....(((.(((..#))).)))..)))))))).	1927	1945	1	-21.3	1	2.64013e-05	0.456	0	0	-12.4965	14	18	8	3UTR
rno-miR-146a-5p	NM_001017461	Ogdh	TGAGAACTGAATTCCATGGGTT#AGCTCGTGGAGGACCACTTGGCGGTGCAGTCTCTCAT#(((((((((..(((((((((((#)))))))))))...............)))).))))).	442	479	1	-20.9	1	2.56197e-05	0.412	2.49843	1.52781	-8.00486	20	37	11	CDS
rno-miR-146a-5p	XM_039092218	Ogdh	TGAGAACTGAATTCCATGGGTT#AGCTCGTGGAGGACCACTTGGCGGTGCAGTCTCTCAT#(((((((((..(((((((((((#)))))))))))...............)))).))))).	522	559	1	-20.9	1	2.56197e-05	0.412	0	0	-8.00486	20	37	11	CDS
rno-miR-146a-5p	NM_001106281	Prcp	TGAGAACTGAATTCCATGGGTT#GACCCGTGGTCAGG#......((((...(((((((((#))))))))))))).	1340	1354	1	-18.2	0	2.36613e-05	0.5	2.02793	1.5887	-23.0273	13	14	13	CDS
rno-miR-146a-5p	NM_001012223	Bin2	TGAGAACTGAATTCCATGGGTT#GGCCCAGGAGAAGGTTCTGCAG#((((((((...((((.((((((#))))))))))..)))))).)).	110	132	1	-19.5	1	2.35443e-05	0.515	-0.0333271	-0.0277713	-9.29429	18	22	10	CDS
rno-miR-146a-5p	NM_001110365	Wasl	TGAGAACTGAATTCCATGGGTT#GAGCTGTGGGGTTCAGTCCAG#((.(.((((((((((((((.((#)).))))))))))))))))).	3954	3975	1	-20.3	0	2.3052e-05	0.559	1.30517	1.18339	-9.61415	19	21	17	3UTR
rno-miR-146a-5p	XM_039104628	Oser1	TGAGAACTGAATTCCATGGGTT#ACCCAAAGAGTTCAGCACAGGAGAAAACTCTACTTCTCT#.(((((((((((((..(((((.#)))))..))))))))..................))))).	617	656	1	-19.4	1	2.27985e-05	0.544	0	0	-4.76182	18	39	8	CDS
rno-miR-146a-5p	XM_017599555	Zfp951	TGAGAACTGAATTCCATGGGTT#CCTGTGGAGTTCCTCTCC#.((((...((((((((((((..#)))))))))))).)))).	2263	2281	1	-20.8	0	2.21853e-05	0.515	0	0	-9.55161	16	18	12	5UTR
rno-miR-146a-5p	NM_001014242	Isoc1	TGAGAACTGAATTCCATGGGTT#GGCCTAAGCTCTCATGGGATTTAAGGTTCC#...(((((((((((((((((..#.))))))))))))..))))).	2936	2966	1	-19.7	0	2.16239e-05	0.515	1.86992	1.57077	-6.51454	17	21	12	3UTR
rno-miR-146a-5p	XM_006248866	Grid2ip	TGAGAACTGAATTCCATGGGTT#GGCCCAGGAGTTCAGC#......(((((((((.((((((#))))))))))))))).	463	479	1	-21.7	0	2.06472e-05	0.412	0	0	-15.7996	15	16	15	CDS
rno-miR-146a-5p	XM_039100616	Tlr13	TGAGAACTGAATTCCATGGGTT#CCATGCTGTGTATGTGAAGGTGGAGGAGGAGGAGTCAGTTCTCT#.((((((((.(((((.......#.))))))))))))).	7961	8005	1	-19.1	1	2.00536e-05	0.515	0	0	-5.26888	13	15	13	5UTR
rno-miR-146a-5p	NM_001012220	Catsper2	TGAGAACTGAATTCCATGGGTT#AACTCATGTTAGGAGATCAGGAGCAGCTAGTGCGCTTCTCC#.(((((((((.(((((((((((#)))))))....)))).))))...............))))).	509	550	1	-14.9	1	1.94316e-05	0.441	0.237283	0.222144	-6.6181	20	41	7	CDS
rno-miR-146a-5p	NM_032073	Kcnq1	TGAGAACTGAATTCCATGGGTT#GCCCAGTCAGTGGGAACTAGAACTTGGCTGAGCATGGGGTTCCTCTCAG#(((((...((((((((((....#.)))))))))).))))).	2260	2309	1	-18.9	0	1.9245e-05	0.5	-0.211205	0.126411	-9.69585	15	18	10	3UTR
rno-miR-146a-5p	XM_001069975	Prob1	TGAGAACTGAATTCCATGGGTT#AACCCCAGCCTTTATCCCCGTGGAGTTGGGTTCC#...(((((.(((((((((((..#.))))))))))).))))).	4774	4808	1	-26.3	0	1.91108e-05	0.456	0	0	-7.57093	16	19	11	CDS
rno-miR-146a-5p	XM_006253295	Adgra2	TGAGAACTGAATTCCATGGGTT#AGCCCAGGCAAGCTCAGGAAATGAGAGCCCTGGGAACTTCGTTCTCC#.((((((.(((((((..(((((#.)))))..)))).))))))))).	4665	4712	1	-22.6	1	1.89659e-05	0.412	0	0	-6.34001	18	23	9	3UTR
rno-miR-146a-5p	XM_039112198	Sec1	TGAGAACTGAATTCCATGGGTT#GGCCCATGGGGCACAGTGGGTCAT#(((..((((..(((((((((((#)))))))))))..))))...))).	7111	7135	1	-22	0	1.7382e-05	0.515	0	0	-15.1559	18	24	11	3UTR
rno-miR-146a-5p	NM_001100512	Gpld1	TGAGAACTGAATTCCATGGGTT#CCCATTTCTGGTGGAACAGTTCCAA#((.((((((..((((((.((..#.)).)))))))))))))).	718	743	1	-17.8	0	1.73665e-05	0.544	1.39583	1.01006	-9.56239	16	19	14	CDS
rno-miR-146a-5p	XM_006251437	Ddx56	TGAGAACTGAATTCCATGGGTT#AGCCCTTGGGAGGCGGTTCTCGT#(((((((((..(((((.(((((#))))).)))))..))))))))).	3349	3372	1	-28	1	1.71485e-05	0.426	0	0	-8.00486	19	23	9	3UTR
rno-miR-146a-5p	XM_039081833	Zfp266	TGAGAACTGAATTCCATGGGTT#GGATGTCAGTTCTTC#.(((((((((..(((.......#)))..))))))))).	862	877	1	-17.7	1	1.67628e-05	0.574	0	0	-10.198	12	15	9	CDS
rno-miR-146a-5p	NM_001372012	Dock5	TGAGAACTGAATTCCATGGGTT#CCCATGGAGCTCAGCGTGCTCT#.(((..((((.(((((((((..#))))))))).))))....))).	2675	2697	1	-22.7	0	1.65868e-05	0.515	0	0	-12.6381	16	22	9	CDS
rno-miR-146a-5p	XM_039093338	Dock5	TGAGAACTGAATTCCATGGGTT#CCCATGGAGCTCAGCGTGCTCT#.(((..((((.(((((((((..#))))))))).))))....))).	2717	2739	1	-22.7	0	1.65868e-05	0.515	0	0	-12.6381	16	22	9	CDS
rno-miR-146a-5p	NM_001271344	Lpcat2	TGAGAACTGAATTCCATGGGTT#TCCATGGGGTTTAGG#......((((((((((((((..#)))))))))))))).	360	375	1	-19.7	0	1.61109e-05	0.456	0.568968	1.07415	-15.5666	14	15	14	CDS
rno-miR-146a-5p	XM_006234975	Stk35	TGAGAACTGAATTCCATGGGTT#AAACCATGGGTTTGGTTCTG#..(((((((((.(((((((...#.)))))))))))))))).	2694	2714	1	-20.8	1	1.56463e-05	0.559	0	0	-8.3038	16	18	16	3UTR
rno-miR-146a-5p	XM_006256193	Anks1a	TGAGAACTGAATTCCATGGGTT#CCCGGAGCAGTTCTCAG#(((((((((..((((..(((..#)))))))))))))))).	1686	1703	1	-19.9	1	1.51449e-05	0.324	0	0	-8.2379	16	17	16	CDS
rno-miR-146a-5p	XM_006256195	Anks1a	TGAGAACTGAATTCCATGGGTT#CCCGGAGCAGTTCTCAG#(((((((((..((((..(((..#)))))))))))))))).	1623	1640	1	-19.9	1	1.51449e-05	0.324	0	0	-8.2379	16	17	16	CDS
rno-miR-146a-5p	XM_008772813	Anks1a	TGAGAACTGAATTCCATGGGTT#CCCGGAGCAGTTCTCAG#(((((((((..((((..(((..#)))))))))))))))).	1686	1703	1	-19.9	1	1.51449e-05	0.324	0	0	-8.2379	16	17	16	CDS
rno-miR-146a-5p	XM_006246057	Unkl	TGAGAACTGAATTCCATGGGTT#GGCCCATGGCTCAAGTTCTG#..((((((((...(((((((((#))))))))).))).))))).	3444	3464	1	-21.7	1	1.43253e-05	0.412	0	0	-12.4177	17	20	9	3UTR
rno-miR-146a-5p	XM_006246059	Unkl	TGAGAACTGAATTCCATGGGTT#GGCCCATGGCTCAAGTTCTG#..((((((((...(((((((((#))))))))).))).))))).	5825	5845	1	-21.7	1	1.43253e-05	0.412	0	0	-12.4177	17	20	9	3UTR
rno-miR-146a-5p	XM_039080186	Fer1l6	TGAGAACTGAATTCCATGGGTT#GGCCCAGGAGTCTAAGTTCTCC#.(((((((..(((((.((((((#)))))))))))...))))))).	1226	1248	1	-23.1	1	1.42843e-05	0.441	0	0	-6.32527	18	22	11	CDS
rno-miR-146a-5p	XM_039089243	Pheta1	TGAGAACTGAATTCCATGGGTT#ACCTTGAGCGCGCCATGGTTAGCAACTTGTGGGAGTCAGTTCTCT#.(((((((((.(((((((((((#.))))))))))).))))))))).	213	258	1	-26.6	1	1.42591e-05	0.456	0	0	-6.6181	20	23	11	5UTR
rno-miR-146a-5p	XM_039078683	RGD1563365	TGAGAACTGAATTCCATGGGTT#AACCCGTGGCCAGTTCTGGG#(.(((((((....(((((((((#))))))))).))))))).).	1013	1033	1	-22.3	1	1.39716e-05	0.441	0	0	-13.8045	17	20	9	3UTR
rno-miR-146a-5p	NM_001106715	Pum2	TGAGAACTGAATTCCATGGGTT#AGCCCATGGTTTCGGG#......(((((..(((((((((#))))))))).))))).	5519	5535	1	-19.9	0	1.35361e-05	0.588	0.397191	0.109282	-20.2025	14	16	9	3UTR
rno-miR-146a-5p	XM_006239879	Pum2	TGAGAACTGAATTCCATGGGTT#AGCCCATGGTTTCGGG#......(((((..(((((((((#))))))))).))))).	5615	5631	1	-19.9	0	1.35361e-05	0.588	0	0	-20.2025	14	16	9	3UTR
rno-miR-146a-5p	XM_006239883	Pum2	TGAGAACTGAATTCCATGGGTT#AGCCCATGGTTTCGGG#......(((((..(((((((((#))))))))).))))).	5372	5388	1	-19.9	0	1.35361e-05	0.588	0	0	-20.2025	14	16	9	3UTR
rno-miR-146a-5p	NM_017226	Padi2	TGAGAACTGAATTCCATGGGTT#GGCCCAGTGGTTAAAAGCACTTGCTGCTCTTGCAGAGGACCTGGGTTCAGTTCTCAG#((((((((((((((...(((((#.))))))))))))))))))).	3279	3336	1	-24.3	1	1.32904e-05	0.471	0.140884	0.0790203	-4.90607	19	21	19	3UTR
rno-miR-146a-5p	XM_006255916	RT1-Ha	TGAGAACTGAATTCCATGGGTT#GGCCCATGGGAGTAGTTCC#...((((((..(((((((((((#))))))))))).)))))).	1604	1623	1	-23.4	0	1.27518e-05	0.412	0	0	-10.5818	17	19	11	3UTR
rno-miR-146a-5p	XM_006251337	Nipsnap1	TGAGAACTGAATTCCATGGGTT#ACCTATGGCGGTTCTCAG#(((((((((....((((((((.#))))))))))))))))).	1211	1229	1	-22.9	1	1.23813e-05	0.382	0	0	-12.6408	17	18	17	CDS
rno-miR-146a-5p	XM_039087450	Cpsf4l	TGAGAACTGAATTCCATGGGTT#GCCCATGGGGTAAGGC#......((..(((((((((((.#)))))))))))..)).	118	134	1	-18.4	0	1.22212e-05	0.5	0	0	-17.8655	13	16	11	5UTR
rno-miR-146a-5p	NM_001106951	Cul4b	TGAGAACTGAATTCCATGGGTT#CCTGTATCAGCTCTTCAGTAGAGTTCGGGGAGGAGTTCAGGTTCTCC#.((((((((((((((.......#.))))))))).))))).	1716	1763	1	-19.6	1	1.22046e-05	0.515	2.50498	2.28896	-4.02637	14	17	9	CDS
rno-miR-146a-5p	XM_039099624	Cul4b	TGAGAACTGAATTCCATGGGTT#CCTGTATCAGCTCTTCAGTAGAGTTCGGGGAGGAGTTCAGGTTCTCC#.((((((((((((((.......#.))))))))).))))).	1651	1698	1	-19.6	1	1.22046e-05	0.515	0	0	-4.02637	14	17	9	CDS
rno-miR-146a-5p	NM_001106228	Ercc1	TGAGAACTGAATTCCATGGGTT#CCCGTGTTGAAGTTTGTTCGCAGTGTGCCCTGGGAATTCGGTG#.....((((((((((..((((.#.))))..)))))))))).	450	493	1	-22.8	0	1.16974e-05	0.471	1.09523	1.18762	-13.8986	14	18	10	CDS
rno-miR-146a-5p	NM_001008280	Lrrc59	TGAGAACTGAATTCCATGGGTT#AGCCTCGGAGCTTGGATTCCTATGGAATTGGGTTCTG#..((((((.(((((((((((..#.))))))))))).)))))).	1159	1196	1	-25.9	1	1.1388e-05	0.5	0.902466	0.950339	-6.01339	17	20	11	3UTR
rno-miR-146a-5p	NM_001191738	Fastkd1	TGAGAACTGAATTCCATGGGTT#AGCACCGTTGCCATCTAGGCCAGTGGAGGCCAGTTCTCC#.((((((((..((((((.((((#.)))).))))))..)))))))).	304	343	1	-24.3	1	1.1221e-05	0.353	-0.135901	0.672375	-7.86061	18	23	8	5UTR
rno-miR-146a-5p	NM_133578	Dusp5	TGAGAACTGAATTCCATGGGTT#ACCCTGGGGAGTCGTTTTCAA#(((((((.((.((((..((((.#))))..)))).))))))))).	2203	2224	1	-19.8	1	1.11664e-05	0.515	0.335147	0.188639	-9.30903	17	21	9	3UTR
rno-miR-146a-5p	XM_039110727	Rims3	TGAGAACTGAATTCCATGGGTT#GCCCATGGAGTCTCCAGG#......(((.(((((((((((.#)))))))))))...))).	1591	1609	1	-20.4	0	1.09504e-05	0.426	0	0	-16.8091	14	18	11	3UTR
rno-miR-146a-5p	NM_001034933	Arsa	TGAGAACTGAATTCCATGGGTT#GATCCATGGAGTCTTCGCGGTTCG#...((((((.((((((((((((#)))))))))))).....)))))).	1145	1169	1	-21.2	0	1.08912e-05	0.5	2.42302	1.4904	-7.75705	18	24	12	CDS
rno-miR-146a-5p	NM_001271346	Ddb2	TGAGAACTGAATTCCATGGGTT#GACCCTGCCTATGGGAGCAGGTTCTG#..((((((...((((((((((.#.))))))))))...)))))).	1493	1519	1	-23.1	1	1.08346e-05	0.471	0.249434	0.392763	-10.0807	16	21	10	3UTR
rno-miR-146a-5p	NM_012874	Ros1	TGAGAACTGAATTCCATGGGTT#GTGGAATTTAGTGCTCAT#((((.((((((((((((.....#)))))))))))).)))).	3335	3353	1	-20.3	0	1.05587e-05	0.588	1.00974	0.555127	-8.05661	16	18	12	CDS
rno-miR-146a-5p	XM_039098445	Ros1	TGAGAACTGAATTCCATGGGTT#GTGGAATTTAGTGCTCAT#((((.((((((((((((.....#)))))))))))).)))).	3466	3484	1	-20.3	0	1.05587e-05	0.588	0	0	-8.05661	16	18	12	CDS
rno-miR-146a-5p	NM_022402	Rplp0	TGAGAACTGAATTCCATGGGTT#AATCCGATGAGGACATGGGATTCGGTCTCT#.(((.(((((((((((((..((#.))..)))))))))))))))).	989	1019	1	-21.8	0	1.04859e-05	0.441	2.41283	2.2294	-7.91236	18	22	16	CDS
rno-miR-146a-5p	NM_153733	Serpinb10	TGAGAACTGAATTCCATGGGTT#GCCCTTTATTTTAAAGGAACCTGGGAGCATCAGTTCTCAG#((((((((((.((((..(((((#.))))).))))..)))))))))).	617	657	1	-24	1	1.04411e-05	0.574	1.86389	0.92234	-6.9954	19	24	10	CDS
rno-miR-146a-5p	XM_006252913	Tmem161a	TGAGAACTGAATTCCATGGGTT#CCCATGGGAATCAGG#......((((.(((((((((..#))))))))).)))).	2702	2717	1	-20.8	0	1.04328e-05	0.441	0	0	-18.3913	13	15	9	3UTR
rno-miR-146a-5p	NM_001017489	Eif2d	TGAGAACTGAATTCCATGGGTT#CCCATGGGAACCCAGGTTCTGAG#(.((((((...(((((((((..#))))))))).....)))))).).	1934	1957	1	-21.3	1	1.04111e-05	0.574	0.318124	1.05182	-10.2249	16	23	9	3UTR
rno-miR-146a-5p	XM_006237753	Prex2	TGAGAACTGAATTCCATGGGTT#ACCCAGTGGGATTACAGTC#.....((((((((((((((((.#))))).))))))).)))).	8980	8999	1	-19.1	0	9.74444e-06	0.632	0	0	-13.6656	16	19	7	3UTR
rno-miR-146a-5p	XM_006229431	Hddc3	TGAGAACTGAATTCCATGGGTT#CCCATCGGTGGGCGTGCCGGTTGGGAAGCAGTTCTCT#.((((((((..((((((.(((.#.))).)).))))..)))))))).	127	164	1	-23.6	1	9.63303e-06	0.338	0	0	-7.86061	17	23	8	5UTR
rno-miR-146a-5p	NM_001127538	Spire2	TGAGAACTGAATTCCATGGGTT#AGCCCGTGGGTTTGGTTCTCT#.((((((((((.((((((((((#)))))))))))))))))))).	1112	1133	1	-27.6	1	9.56853e-06	0.324	0.286549	1.22677	-7.14013	20	21	20	CDS
rno-miR-146a-5p	XM_006251448	Ogdh	TGAGAACTGAATTCCATGGGTT#AGCTCGTGGAGGACCACTTGGCGGTGCAGTCTCTCAT#(((((((((..(((((((((((#)))))))))))...............)))).))))).	522	559	1	-20.9	1	9.45684e-06	0.412	0	0	-8.00486	20	37	11	CDS
rno-miR-146a-5p	XM_039092222	Ogdh	TGAGAACTGAATTCCATGGGTT#AGCTCGTGGAGGACCACTTGGCGGTGCAGTCTCTCAT#(((((((((..(((((((((((#)))))))))))...............)))).))))).	522	559	1	-20.9	1	9.45684e-06	0.412	0	0	-8.00486	20	37	11	CDS
rno-miR-146a-5p	NM_001034020	Syn2	TGAGAACTGAATTCCATGGGTT#GATCCACAGTGTCTCCTTTCTCCCCTCTGGAGAGCAGTTCTG#..(((((((..(((((.(((..#.)))..)))))..))))))).	2452	2494	1	-20.8	1	9.39286e-06	0.5	0.0538016	0.178264	-9.02428	15	21	7	3UTR
rno-miR-146a-5p	NM_001107596	Cemip2	TGAGAACTGAATTCCATGGGTT#GCTGAGTTCGGAGAGCAGTTCTCAT#(((((((((..((((.......#.))))..))))))))).	4332	4357	1	-18.7	1	8.9636e-06	0.471	0.733239	0.547696	-8.2379	13	17	9	3UTR
rno-miR-146a-5p	XM_039080171	Cemip2	TGAGAACTGAATTCCATGGGTT#GCTGAGTTCGGAGAGCAGTTCTCAT#(((((((((..((((.......#.))))..))))))))).	4539	4564	1	-18.7	1	8.9636e-06	0.471	0	0	-8.2379	13	17	9	3UTR
rno-miR-146a-5p	NM_001000785	Olr1408	TGAGAACTGAATTCCATGGGTT#CCCACTTAACTGTGGTCATTCTGTTCTATGGGACAGTTCTGGG#(.(((((((..(((((((((..#.)))))))))))))))).).	733	776	1	-19.4	1	8.92692e-06	0.529	0.713588	0.331843	-9.16853	17	20	16	CDS
rno-miR-146a-5p	XM_006253372	Defb14	TGAGAACTGAATTCCATGGGTT#GGCCCATGCCATAGCCAAAGGATCACCTGTGGAATCTGTTTTCC#.((((((.(.(((((((((((.#.)))))))))))).)))))).	2127	2171	1	-20.9	1	8.20162e-06	0.529	0	0	-7.34947	18	21	12	5UTR
rno-miR-146a-5p	NM_033350	Plcb3	TGAGAACTGAATTCCATGGGTT#CCCATGGAGTTCGT#.......(((((((((((((..#))))))))))))).	1911	1925	1	-21.1	0	8.14719e-06	0.456	1.68529	1.4812	-17.1102	13	14	13	CDS
rno-miR-146a-5p	NM_001109037	Gemin4	TGAGAACTGAATTCCATGGGTT#GCCCAGGAGCTTCAGCTCTCT#.((((.(((((((((.(((((.#))))))))).))))).)))).	2740	2761	1	-23.3	0	7.98019e-06	0.5	1.17271	0.793852	-5.92733	18	21	9	CDS
rno-miR-146a-5p	XM_006241205	Washc4	TGAGAACTGAATTCCATGGGTT#GGCCTTCCTGTGGGGTTGGGTTCCAC#((.(((((.(((((((((((..#.))))))))))).))))))).	4070	4096	1	-22.7	0	7.92213e-06	0.456	0	0	-6.5515	18	21	11	3UTR
rno-miR-146a-5p	XM_039096218	Etl4	TGAGAACTGAATTCCATGGGTT#AGCCCTTTCTCCCAGCTCTGGGAAAAGCAGTTCTCT#.((((((((..((((..(((((#.)))))..))))...)))))))).	6043	6079	1	-21.6	1	7.65912e-06	0.441	0	0	-8.09365	17	24	8	CDS
rno-miR-146a-5p	XM_039096219	Etl4	TGAGAACTGAATTCCATGGGTT#AGCCCTTTCTCCCAGCTCTGGGAAAAGCAGTTCTCT#.((((((((..((((..(((((#.)))))..))))...)))))))).	5780	5816	1	-21.6	1	7.65912e-06	0.441	0	0	-8.09365	17	24	8	CDS
rno-miR-146a-5p	XM_039096220	Etl4	TGAGAACTGAATTCCATGGGTT#AGCCCTTTCTCCCAGCTCTGGGAAAAGCAGTTCTCT#.((((((((..((((..(((((#.)))))..))))...)))))))).	5663	5699	1	-21.6	1	7.65912e-06	0.441	0	0	-8.09365	17	24	8	CDS
rno-miR-146a-5p	XM_039096222	Etl4	TGAGAACTGAATTCCATGGGTT#AGCCCTTTCTCCCAGCTCTGGGAAAAGCAGTTCTCT#.((((((((..((((..(((((#.)))))..))))...)))))))).	5558	5594	1	-21.6	1	7.65912e-06	0.441	0	0	-8.09365	17	24	8	CDS
rno-miR-146a-5p	XM_039096230	Etl4	TGAGAACTGAATTCCATGGGTT#AGCCCTTTCTCCCAGCTCTGGGAAAAGCAGTTCTCT#.((((((((..((((..(((((#.)))))..))))...)))))))).	3892	3928	1	-21.6	1	7.65912e-06	0.441	0	0	-8.09365	17	24	8	CDS
rno-miR-146a-5p	XM_039096231	Etl4	TGAGAACTGAATTCCATGGGTT#AGCCCTTTCTCCCAGCTCTGGGAAAAGCAGTTCTCT#.((((((((..((((..(((((#.)))))..))))...)))))))).	3877	3913	1	-21.6	1	7.65912e-06	0.441	0	0	-8.09365	17	24	8	CDS
rno-miR-146a-5p	XM_006237224	Erc1	TGAGAACTGAATTCCATGGGTT#CCCGTGAGGGTTCGGTGGACTCT#.(((.(((((((((((((((..#)))))).)))))))))...))).	5322	5345	1	-22.6	0	7.4408e-06	0.412	0	0	-7.91236	18	23	9	3UTR
rno-miR-146a-5p	XM_006237225	Erc1	TGAGAACTGAATTCCATGGGTT#CCCGTGAGGGTTCGGTGGACTCT#.(((.(((((((((((((((..#)))))).)))))))))...))).	5310	5333	1	-22.6	0	7.4408e-06	0.412	0	0	-7.91236	18	23	9	3UTR
rno-miR-146a-5p	XM_006237227	Erc1	TGAGAACTGAATTCCATGGGTT#CCCGTGAGGGTTCGGTGGACTCT#.(((.(((((((((((((((..#)))))).)))))))))...))).	5226	5249	1	-22.6	0	7.4408e-06	0.412	0	0	-7.91236	18	23	9	3UTR
rno-miR-146a-5p	XM_039091668	Fras1	TGAGAACTGAATTCCATGGGTT#ACCTAGGAGGAATTCAGTTTG#...((((((((((((.(((((.#)))))...)))))))))))).	10717	10738	1	-20.7	0	7.3185e-06	0.5	0	0	-6.74759	17	21	12	CDS
rno-miR-146a-5p	XM_008769272	Dnah10	TGAGAACTGAATTCCATGGGTT#CCCATGGAACAAGCTAGTTCC#...((((((..(((((((((..#))))))))).....)))))).	7706	7727	1	-19.3	0	7.15834e-06	0.529	0	0	-10.5818	15	21	9	CDS
rno-miR-146a-5p	NM_001130581	Fam227a	TGAGAACTGAATTCCATGGGTT#AACCTGTGGATTTCAGG#......(((((.((((((((((#)))))))))).))))).	1027	1044	1	-20.7	0	6.93644e-06	0.544	0.275683	-0.0682165	-18.9134	15	17	10	CDS
rno-miR-146a-5p	XM_039078837	Fam227a	TGAGAACTGAATTCCATGGGTT#AACCTGTGGATTTCAGG#......(((((.((((((((((#)))))))))).))))).	1057	1074	1	-20.7	0	6.93644e-06	0.544	0	0	-18.9134	15	17	10	CDS
rno-miR-146a-5p	XM_039108135	Creb5	TGAGAACTGAATTCCATGGGTT#ACCCAGGCGGTTCTCAG#(((((((((....((.(((((.#)))))))))))))))).	746	763	1	-20.3	1	6.92849e-06	0.294	0	0	-12.8738	16	17	16	5UTR
rno-miR-146a-5p	NM_022851	Aldh5a1	TGAGAACTGAATTCCATGGGTT#TCCTGGAGTGGTTCTCAG#((((((((..((((((.(((..#))))))))))))))))).	467	485	1	-19.6	1	6.86309e-06	0.515	2.37034	1.05066	-6.23647	17	18	17	CDS
rno-miR-146a-5p	XM_039094613	Zcchc24	TGAGAACTGAATTCCATGGGTT#GGCCTGTGGGAAGTTCTCC#.(((((((...(((((((((((#)))))))))))))))))).	1434	1453	1	-21.8	1	6.6886e-06	0.426	0	0	-8.917	18	19	18	3UTR
rno-miR-146a-5p	XM_039082345	Kmt2a	TGAGAACTGAATTCCATGGGTT#GGCCCAGGGGTTCAGC#......(((((((((.((((((#))))))))))))))).	8663	8679	1	-20.7	0	6.50187e-06	0.412	0	0	-15.7996	15	16	15	CDS
rno-miR-146a-5p	XM_039083807	Gtf3c3	TGAGAACTGAATTCCATGGGTT#TCCACGTCAGGGGACAACTCTTGGGAGCTAGTTCTCT#.((((((((..(((((.(((((#.))))).)))))..)))))))).	3879	3916	1	-22.3	1	6.49577e-06	0.5	0	0	-7.86061	18	23	8	3UTR
rno-miR-146a-5p	NM_001000886	Olr1710	TGAGAACTGAATTCCATGGGTT#GGAATTCTCCTCATGGGGTTCTCT#.(((((((.....(((((((..#.)))))))))))))).	30	54	1	-17.9	1	6.17603e-06	0.515	0.245071	0.254907	-13.5529	14	16	14	CDS
rno-miR-146a-5p	XM_006242110	Tcf20	TGAGAACTGAATTCCATGGGTT#GACCCATGGAAACCATGAAGGCCCAGGCCTCT#.(((..(((..(((((((((((#)))))))))))............)))..))).	7047	7079	1	-21.5	0	5.51241e-06	0.397	0	0	-13.8806	17	32	11	3UTR
rno-miR-146a-5p	NM_001127635	Zfp9	TGAGAACTGAATTCCATGGGTT#AACCTTATCGAGAACATGCCCATCATGGAATGTTAGTTCCAT#((.((((((((((((((((((.#.)))))...)))))).))))))))).	1985	2027	1	-21.4	0	5.38645e-06	0.662	0	0	-5.49511	20	26	9	3UTR
rno-miR-146a-5p	XM_039083012	Adgrf5	TGAGAACTGAATTCCATGGGTT#ACCCAAGGAGACACGGTTCTCC#.((((((((..((((.(((((.#))))).))))...)))))))).	4958	4980	1	-22.5	1	5.38229e-06	0.574	0	0	-8.09365	17	22	8	3UTR
rno-miR-146a-5p	NM_001191941	Myo7b	TGAGAACTGAATTCCATGGGTT#ACCCTGGAGGAGTTCTCC#.(((((((...(((((.((((.#))))))))).))))))).	4942	4960	1	-20.2	1	5.20997e-06	0.485	1.23183	1.31337	-8.917	16	18	9	CDS
rno-miR-146a-5p	XM_006254600	Myo7b	TGAGAACTGAATTCCATGGGTT#ACCCTGGAGGAGTTCTCC#.(((((((...(((((.((((.#))))))))).))))))).	4974	4992	1	-20.2	1	5.20997e-06	0.485	0	0	-8.917	16	18	9	CDS
rno-miR-146a-5p	XM_006240948	Sppl2b	TGAGAACTGAATTCCATGGGTT#CCCATGGAGCAGGCTCC#.(((..(((..(((((((((..#)))))))))))).))).	2160	2177	1	-19.8	0	4.95071e-06	0.353	0	0	-13.8806	15	17	12	3UTR
rno-miR-146a-5p	XM_039097987	Arhgap10	TGAGAACTGAATTCCATGGGTT#AGCCCGTGGGACAGAGAGGGCAGTCCTCAT#((((.((((..(((((((((((#))))))))))).........)))).)))).	2880	2910	1	-22.5	0	4.3037e-06	0.397	0	0	-12.1239	19	30	11	3UTR
rno-miR-146a-5p	NM_022531	Des	TGAGAACTGAATTCCATGGGTT#AACATGAAGTGCTGTAAGCCAGGAATTCAGTGTCC#.((..((((((((((.(((.((#.)).))))))))))))).)).	1474	1509	1	-19.6	0	4.24639e-06	0.441	0.885937	1.16454	-11.1774	17	21	13	CDS
rno-miR-146a-5p	NM_001107773	Stk35	TGAGAACTGAATTCCATGGGTT#GACTCTAGAAAAAAGACCTAAACCATGGGTTTGGTTCTG#..(((((((((.(((((((...#.)))))))))))))))).	3293	3332	1	-20.8	1	4.20988e-06	0.559	0.116968	0.412642	-8.3038	16	18	16	3UTR
rno-miR-146a-5p	NM_001305276	Helz2	TGAGAACTGAATTCCATGGGTT#CCCAGCAGGGAGCCAGTTCTCAT#(((((((((..((((.((((..#))))...))))..))))))))).	5019	5042	1	-24.1	1	4.17484e-06	0.368	0	0	-8.2379	17	23	9	CDS
rno-miR-146a-5p	NM_001014104	Metrnl	TGAGAACTGAATTCCATGGGTT#GACACCGTACTGCTGTCCTTCAGATGAGCCATGGCTCAGTTGCTCT#.(((((((((...((((((.((#.)).)))))).)))))).))).	1142	1188	1	-21.2	1	4.13068e-06	0.515	-0.168439	0.207323	-11.254	17	22	6	3UTR
rno-miR-146a-5p	XM_008767723	LOC684471	TGAGAACTGAATTCCATGGGTT#GGCACGTGTATGGAAGTCAGGGACCTCCATGGAGTCAGTTCTG#..(((((((.((((((((((..#.))))))))))))))))).	133	176	1	-25.1	1	4.06921e-06	0.471	0	0	-6.19951	17	19	17	5UTR
rno-miR-146a-5p	NM_001108299	Etv4	TGAGAACTGAATTCCATGGGTT#CCATGGAGAGCAGTGTCTTT#.((((((((..((((((((...#))))))))..)))).)))).	624	644	1	-20	1	3.89375e-06	0.441	0.187252	0.857892	-7.86061	16	20	8	CDS
rno-miR-146a-5p	XM_006247371	Etv4	TGAGAACTGAATTCCATGGGTT#CCATGGAGAGCAGTGTCTTT#.((((((((..((((((((...#))))))))..)))).)))).	574	594	1	-20	1	3.89375e-06	0.441	0	0	-7.86061	16	20	8	CDS
rno-miR-146a-5p	NM_001191862	Flnc	TGAGAACTGAATTCCATGGGTT#GCCCGTGGAGTTCACCATTGATGCTCGTGATGCTGGTGAGGGGCTTCTCAC#(((((((((((((((((((((.#))))))))))))))............................).)))))).	4865	4916	1	-24.4	1	3.702e-06	0.441	1.82917	1.81043	-3.93757	21	51	14	CDS
rno-miR-146a-5p	NM_001025687	Dclre1b	TGAGAACTGAATTCCATGGGTT#ACCCAGGAGTGCAGTTCCCG#.(.((((((.(((((.(((((.#)))))))))).)))))).).	120	140	1	-22.1	0	3.69833e-06	0.382	0.245021	0.0538471	-6.82642	17	20	10	5UTR
rno-miR-146a-5p	NM_001107744	Nup160	TGAGAACTGAATTCCATGGGTT#AGCCTCTTACCCGGTGGGGTTCATGTCTCT#.((((..((((((((((((((.#.))))).)))))))))..)))).	941	971	1	-23.4	0	3.52822e-06	0.559	0.71725	1.29573	-7.23797	18	23	9	CDS
rno-miR-146a-5p	XM_039099292	Crybg1	TGAGAACTGAATTCCATGGGTT#AACCCGTGGTGATCGGTTCCAT#((.(((((((...(((((((((#)))))))))...))))))))).	4235	4257	1	-24.3	0	3.37264e-06	0.515	0	0	-12.9558	18	22	9	CDS
rno-miR-146a-5p	NM_134396	Micu2	TGAGAACTGAATTCCATGGGTT#AACCTGTGGGAGCCGGTTCTCC#.((((((((..(((((((((((#)))))))))))..)))))))).	1482	1504	1	-26.9	1	3.21827e-06	0.456	2.24967	1.74228	-7.86061	19	22	11	3UTR
rno-miR-146a-5p	XM_039092977	Micu2	TGAGAACTGAATTCCATGGGTT#AACCTGTGGGAGCCGGTTCTCC#.((((((((..(((((((((((#)))))))))))..)))))))).	1460	1482	1	-26.9	1	3.21827e-06	0.456	0	0	-7.86061	19	22	11	3UTR
rno-miR-146a-5p	XM_220237	Ptx4	TGAGAACTGAATTCCATGGGTT#AGCTCGTTTCCCTGGGAACCTTGGGTTCTCAG#((((((((.((((((..(((..#.)))..))))..)).)))))))).	64	96	1	-22.6	1	3.09886e-06	0.456	0	0	-5.22701	17	24	8	5UTR
rno-miR-146a-5p	NM_001109576	Tsen54	TGAGAACTGAATTCCATGGGTT#GGCCCAGGAGTTGGGG#......((.((((((.((((((#)))))))))))).)).	1877	1893	1	-18.4	0	2.94855e-06	0.5	-0.145916	0.457415	-16.856	14	16	12	3UTR
rno-miR-146a-5p	NM_001170326	Gpr158	TGAGAACTGAATTCCATGGGTT#CCCGGAATTCAGG#......(((((((((..(((..#)))))))))))).	1593	1606	1	-17.1	0	2.7528e-06	0.544	2.10676	1.74108	-15.7996	12	13	12	CDS
rno-miR-146a-5p	NM_001012222	Fbxo7	TGAGAACTGAATTCCATGGGTT#ATCCAGGACCTGCTGCCCACGTTGGGGTTCAGTTCTGAT#(.(((((((((((((((((((.#.)))))...)))))))))))))).).	123	162	1	-27.6	1	2.63481e-06	0.529	0.075687	0.178864	-5.10125	20	26	14	CDS
rno-miR-146a-5p	XM_006235038	Ap5s1	TGAGAACTGAATTCCATGGGTT#CCCTGGAGTTCCCAACCATTCTTCTGAGGGGCTTAGTTCTTAA#((((((((((((((((.(((..#))))))))))).......................)))))))).	3738	3781	1	-20.5	1	2.48184e-06	0.574	0	0	-3.93757	19	43	11	3UTR
rno-miR-146a-5p	NM_001108690	Emc1	TGAGAACTGAATTCCATGGGTT#GCCCATGGAGGCCAGA#......(((..((((((((((.#))))))))))..))).	5741	5757	1	-20.2	0	2.3532e-06	0.456	0.0192912	0.00821548	-19.6338	13	16	10	3UTR
rno-miR-146a-5p	XM_006229763	Uvrag	TGAGAACTGAATTCCATGGGTT#GACCCATGGGGCCAGTCCG#...(.((((..(((((((((((#))))))))))).)))).).	2442	2461	1	-19.7	0	2.30273e-06	0.426	0	0	-14.7009	16	19	11	3UTR
rno-miR-146a-5p	NM_001282324	Pnpla3	TGAGAACTGAATTCCATGGGTT#GCCCGTGGAGTCGGCCATCG#.((...(((.(((((((((((.#))))))))))))))...)).	1095	1115	1	-21.5	0	2.16967e-06	0.353	1.63938	0.520666	-14.0878	16	20	14	CDS
rno-miR-146a-5p	XM_006235598	Rbpjl	TGAGAACTGAATTCCATGGGTT#AGCCTAGGGGATTTGTTCTCC#.((((((.(((((((.((((((#)))))).))))))))))))).	2051	2072	1	-21.5	1	2.12057e-06	0.529	0	0	-6.34001	19	21	13	3UTR
rno-miR-146a-5p	XM_006254816	Cdx1	TGAGAACTGAATTCCATGGGTT#CTCGTGGGAACACAGGTTCTCAA#((((((((...(((((((((..#))))))))).....)))))))).	4196	4219	1	-21.7	1	1.79845e-06	0.515	0	0	-9.06125	17	23	9	5UTR
rno-miR-146a-5p	XM_039091930	Arap2	TGAGAACTGAATTCCATGGGTT#GTGGGAAGCAGTTCTCAT#(((((((((..((((((.....#))))))..))))))))).	228	246	1	-21.4	1	1.4765e-06	0.544	0	0	-8.00486	15	18	9	5UTR
rno-miR-146a-5p	NM_001013223	Pcbp2	TGAGAACTGAATTCCATGGGTT#GACCCATGGCAACACCGGATTCAGTGGCATTGAATCCAGCTCTCC#.(((((((((((((((((((((#)))))))))........))))))))...............)))).	996	1041	1	-22.3	1	1.32736e-06	0.485	1.92869	2.15525	-3.79332	21	45	9	CDS
rno-miR-146a-5p	XM_006253152	Stox2	TGAGAACTGAATTCCATGGGTT#AGCCCATGGAAGTGGGTC#.....(((.(.(((((((((((#))))))))))).).))).	3448	3466	1	-20.3	0	9.991e-07	0.485	0	0	-17.5468	15	18	11	3UTR
rno-miR-146a-5p	XM_039082345	Kmt2a	TGAGAACTGAATTCCATGGGTT#GGCCCATGGGAAGTGGGCTCAC#((((..(....(((((((((((#)))))))))))...)..)))).	10329	10351	1	-22.1	0	9.21007e-07	0.471	0	0	-17.3949	16	22	11	CDS
rno-miR-146a-5p	XM_006240075	Strn3	TGAGAACTGAATTCCATGGGTT#AACCAAGGACTATTAGTGAATTAAAACAAAGGTGTGGAGTTTAGTACTCC#.(((.((((((((((((.....#.)))))))))))).))).	3283	3333	1	-19	0	8.74365e-07	0.676	0	0	-7.91236	15	18	12	3UTR
rno-miR-146a-5p	XM_006240076	Strn3	TGAGAACTGAATTCCATGGGTT#AACCAAGGACTATTAGTGAATTAAAACAAAGGTGTGGAGTTTAGTACTCC#.(((.((((((((((((.....#.)))))))))))).))).	3253	3303	1	-19	0	8.74365e-07	0.676	0	0	-7.91236	15	18	12	3UTR
rno-miR-146a-5p	XM_006240077	Strn3	TGAGAACTGAATTCCATGGGTT#AACCAAGGACTATTAGTGAATTAAAACAAAGGTGTGGAGTTTAGTACTCC#.(((.((((((((((((.....#.)))))))))))).))).	3142	3192	1	-19	0	8.74365e-07	0.676	0	0	-7.91236	15	18	12	3UTR
rno-miR-146a-5p	NM_033359	Ngb	TGAGAACTGAATTCCATGGGTT#CCCATGGGGCCCTGAGTTCTGGG#(.((((((.(.(((((((((..#)))))))))...).)))))).).	1481	1504	1	-21.4	1	7.67759e-07	0.426	0.178703	0.0720996	-8.98241	17	23	9	3UTR
rno-miR-146a-5p	XM_017595430	Clstn2	TGAGAACTGAATTCCATGGGTT#CCATGGGGCAGTTCTA#..(((((((..((((((((...#))))))))))))))).	3463	3479	1	-20.2	1	7.59869e-07	0.471	0	0	-9.02428	15	16	15	3UTR
rno-miR-146a-5p	XM_006233883	Ttf1	TGAGAACTGAATTCCATGGGTT#GACCCATGGTGGGTTCG#...(((((.(...(((((((((#)))))))))).))))).	2277	2294	1	-20.1	0	6.26017e-07	0.471	0	0	-15.0316	15	17	10	CDS
rno-miR-146a-5p	XM_039108705	LOC102552663	TGAGAACTGAATTCCATGGGTT#AACCGTCAGTTCTTGTGAGAGGCCAGGACTTCAGTTCTGGG#(.(((((((((.(((.(((.((#.)).)))))).))))))))).).	2901	2942	1	-21.4	1	4.90167e-07	0.426	0	0	-8.6811	18	23	9	3UTR
rno-miR-146a-5p	XM_006253421	Mcf2l	TGAGAACTGAATTCCATGGGTT#AGCCTGTGGAGACAGTGCTCT#.(((.((((..(((((((((((#))))))))))).)))).))).	2557	2578	1	-21.3	0	4.32888e-07	0.426	0	0	-11.9796	18	21	11	CDS
rno-miR-146a-5p	XM_006253424	Mcf2l	TGAGAACTGAATTCCATGGGTT#AGCCTGTGGAGACAGTGCTCT#.(((.((((..(((((((((((#))))))))))).)))).))).	2532	2553	1	-21.3	0	4.32888e-07	0.426	0	0	-11.9796	18	21	11	CDS
rno-miR-146a-5p	XM_039094162	Mcf2l	TGAGAACTGAATTCCATGGGTT#AGCCTGTGGAGACAGTGCTCT#.(((.((((..(((((((((((#))))))))))).)))).))).	2557	2578	1	-21.3	0	4.32888e-07	0.426	0	0	-11.9796	18	21	11	CDS
rno-miR-146a-5p	XM_039094166	Mcf2l	TGAGAACTGAATTCCATGGGTT#AGCCTGTGGAGACAGTGCTCT#.(((.((((..(((((((((((#))))))))))).)))).))).	2470	2491	1	-21.3	0	4.32888e-07	0.426	0	0	-11.9796	18	21	11	CDS
rno-miR-146a-5p	XM_039094167	Mcf2l	TGAGAACTGAATTCCATGGGTT#AGCCTGTGGAGACAGTGCTCT#.(((.((((..(((((((((((#))))))))))).)))).))).	3331	3352	1	-21.3	0	4.32888e-07	0.426	0	0	-11.9796	18	21	11	CDS
rno-miR-146a-5p	NM_031700	Cldn3	TGAGAACTGAATTCCATGGGTT#GGAGTTGGTTCTCAG#((((((((.((((((.......#)))))))))))))).	353	368	1	-17.9	1	4.20429e-07	0.397	0.483165	0.546385	-5.22701	14	15	14	5UTR
rno-miR-146a-5p	XM_039107349	Alms1	TGAGAACTGAATTCCATGGGTT#GCCCAGGAGAGTTCTCT#.(((((((...((((.(((((.#)))))))))))))))).	10859	10876	1	-20.4	1	1.77752e-07	0.441	0	0	-9.15004	16	17	16	CDS
rno-miR-146a-5p	XM_039107350	Alms1	TGAGAACTGAATTCCATGGGTT#GCCCAGGAGAGTTCTCT#.(((((((...((((.(((((.#)))))))))))))))).	10832	10849	1	-20.4	1	1.77752e-07	0.441	0	0	-9.15004	16	17	16	CDS
rno-miR-146a-5p	XM_039107352	Alms1	TGAGAACTGAATTCCATGGGTT#GCCCAGGAGAGTTCTCT#.(((((((...((((.(((((.#)))))))))))))))).	10769	10786	1	-20.4	1	1.77752e-07	0.441	0	0	-9.15004	16	17	16	CDS
rno-miR-146a-5p	XM_039107353	Alms1	TGAGAACTGAATTCCATGGGTT#GCCCAGGAGAGTTCTCT#.(((((((...((((.(((((.#)))))))))))))))).	10664	10681	1	-20.4	1	1.77752e-07	0.441	0	0	-9.15004	16	17	16	CDS
rno-miR-146a-5p	XM_006238022	Il11ra1	TGAGAACTGAATTCCATGGGTT#TGGAGGCAGTTCTCC#.((((((((..(((((......#))))).)))))))).	67	82	1	-17.5	1	1.34681e-07	0.397	0	0	-7.86061	13	15	8	5UTR
rno-miR-146a-5p	NM_001106564	RGD1306233	TGAGAACTGAATTCCATGGGTT#AACCTATGGGAGCAGAGCTCC#.(((..(((..(((((((((((#))))))))))).)))..))).	250	271	1	-21.7	0	1.09353e-07	0.485	0.127041	0.00896306	-13.8806	17	21	11	CDS
rno-miR-146a-5p	XM_039085857	Amdhd2	TGAGAACTGAATTCCATGGGTT#CCCATGGGGCAGGGGTCCTCGG#((((.(((...(((((((((..#)))))))))....))).)))).	539	561	1	-19.9	0	1.64009e-08	0.353	0	0	-13.1803	16	22	9	CDS

## Sheet: miRDB
Target Detail	Target Rank	Target Score	miRNA Name	Gene Symbol	Gene Description
Details	1	99	rno-miR-146a-5p	Irak1	interleukin-1 receptor-associated kinase 1
Details	2	97	rno-miR-146a-5p	Nova1	NOVA alternative splicing regulator 1
Details	3	94	rno-miR-146a-5p	Fbxw2	F-box and WD repeat domain containing 2
Details	4	94	rno-miR-146a-5p	Kctd9	potassium channel tetramerization domain containing 9
Details	5	94	rno-miR-146a-5p	Rida	reactive intermediate imine deaminase A homolog
Details	6	93	rno-miR-146a-5p	Slc10a3	solute carrier family 10, member 3
Details	7	93	rno-miR-146a-5p	Popdc2	popeye domain containing 2
Details	8	93	rno-miR-146a-5p	Traf6	TNF receptor associated factor 6
Details	9	92	rno-miR-146a-5p	Eif4g2	eukaryotic translation initiation factor 4, gamma 2
Details	10	92	rno-miR-146a-5p	Tmem56	transmembrane protein 56
Details	11	92	rno-miR-146a-5p	Lactb2	lactamase, beta 2
Details	12	91	rno-miR-146a-5p	Hnrnpd	heterogeneous nuclear ribonucleoprotein D
Details	13	90	rno-miR-146a-5p	Srp54a	signal recognition particle 54A
[truncated: 2 more rows]
